# Supplementary material for: Cellular mechanisms underlying central sensitization in a mouse model of chronic muscle pain
Source: eLife. 2022 Nov 15;11:e78610. doi: 10.7554/eLife.78610 (PMC9665847; doi:10.7554/eLife.78610)
Supplement: Figure 1—figure supplement 1—source data 1. [file elife-78610-fig1-figsupp1-data1.xlsx]

## Sheet: Figure 1-Figure Supplement 1A  
The open-arm time and total distance in Ctrl and MP mice
Individual data showing the open-arm time (%) of each mouse
mouse	Ctrl		mouse	MP
1	16.59		1	11.1
2	24.46		2	14.63
3	19.46		3	5.31
4	19.92		4	7.91
5	31.14		5	11.45
6	18.6		6	8.97
7	23.23		7	15.83
8	30.83		8	19.27
9	26.378		9	16.7249
10	28.2477		10	19.29
11	18.85		11	22.9614
12	16.3312		12	21.0651
13	22.1658		13	16.0367
14	14.9927		14	11.7617
15	23.4726		15	17.573
Individual data showing the total distance of each mouse
mouse	Ctrl		mouse	MP
1	27.4851		1	37.0412
2	22.3621		2	14.3844
3	19.3387		3	17.4215
4	23.2478		4	15.0619
5	17.79		5	17.4215
6	19.5167		6	19.6702
7	21.3902		7	17.8843
8	21.8792		8	21.9041
9	19.8453		9	21.2766
10	20.0979		10	19.3261
11	20.389		11	24.3535
12	23.6852		12	31.1688
13	25.1		13	25.5427
14	23.0525		14	20.3661
15	23.0987		15	25.4187

## Sheet: Figure1-Figure Supplement 1B
The number of transitions and total distance in Ctrl and MP mice
Individual data showing the time in light zone (s) of each mouse							Individual data showing the number of transitions of each mouse							Individual data showing the total distance (m) of each mouse
mouse	Ctrl		mouse	MP			mouse	Ctrl		mouse	MP			mouse	Ctrl		mouse	MP
1	339		1	199			1	39		1	17			1	29.924		1	25.287
2	295		2	271			2	24		2	25			2	25.769		2	29.579
3	269		3	293			3	30		3	34			3	31.156		3	36.721
4	277		4	268			4	59		4	27			4	30.469		4	27.259
5	377		5	87			5	53		5	29			5	27.394		5	25.179
6	312		6	278			6	32		6	25			6	29.216		6	20.531
7	98		7	218			7	49		7	29			7	29.76		7	21.084
8	317		8	267			8	33		8	31			8	23.393		8	28.95
9	281		9	162			9	47		9	38			9	23.771		9	24.456
10	273		10	192			10	42		10	33			10	25.222		10	24.32
11	361		11	167			11	38		11	33			11	27.901		11	23.466
12	326		12	263			12	27		12	41			12	25.088		12	32.568
13	285		13	216			13	25		13	24			13	20.507		13	22.43
14	302		14	228			14	37		14	20			14	34.812		14	24.191
15	316		15	174			15	24		15	30			15	12.521		15	29.079
16	231		16	149			16	32		16	22			16	38.971		16	29.22
17	200		17	292			17	36		17	11			17	29.358		17	14.756
18	275		18	195			18	21		18	22			18	10.86		18	23.334
19	137		19	272			19	27		19	21			19	20.6		19	20.16
			20	196						20	24						20	19.173
			21	189						21	26						21	25.428
			22	143						22	23						22	28.827

## Sheet: Figure1-Figure Supplement 1C
The number of buried marbles in Ctrl and MP mice
Individual data showing the number of buried marbles of each mouse
mouse	Ctrl		mouse	MP
1	5		1	8
2	6		2	7
3	5		3	9
4	10		4	15
5	11		5	14
6	10		6	15
7	7		7	16
8	9		8	20
			9	19

## Sheet: Figure1-Figure Supplement 1D
The relative time of immobility in Ctrl and MP mice
Individual data showing the relative time of immobility (%) of each mouse
mouse	Ctrl		mouse	MP
1	35.31		1	51.83
2	31.75		2	53.33
3	54.67		3	60.28
4	44.17		4	72.41
5	63.61		5	76.97
6	40.7639		6	63.62
7	45.2667		7	62.12
8	49.7575		8	61.0056
9	48.7289		9	72.9611
10	54.4925		10	61.3583
11	69.29		11	61.9422
12	60.26		12	70.3704
13	44.2814		13	62.7853
14	38.6941		14	74.664

## Sheet: Figure1-Figure Supplement 1E
The social-zone time and total distance in Ctrl and MP mice
Individual data showing the social-zone time of each mouse							Individual data showing the total distance (m) of each mouse
mouse	Ctrl		mouse	MP			mouse	Ctrl		mouse	MP
1	53.95		1	44.11			1	32.0641		1	23.7645
2	45.85		2	39.013			2	34.2575		2	23.0449
3	62.3949		3	37.53			3	30.6423		3	22.6171
4	72.2693		4	38.5914			4	32.574		4	18.4501
5	51.9046		5	38.7946			5	20.8173		5	22.2049
6	64.3899		6	42.57			6	29.7636		6	28.8242
7	54.6188		7	48.1037			7	22.0261		7	29.0634
8	42.9825		8	48.1689			8	28.1712		8	23.2496
9	46.3508		9	55.3896			9	30.2495		9	32.4963
10	61.432		10	40.8125			10	21.7232		10	34.9588
11	73.834		11	59.8634			11	28.1466		11	30.5317
			12	60.1279						12	41.6065
			13	48.402						13	25.4763
