# Supplementary material for: Cellular mechanisms underlying central sensitization in a mouse model of chronic muscle pain
Source: eLife. 2022 Nov 15;11:e78610. doi: 10.7554/eLife.78610 (PMC9665847; doi:10.7554/eLife.78610)
Supplement: Figure 1—source data 1. [file elife-78610-fig1-data1.xlsx]

## Sheet: Figure 1B
The paw withdrawal (PW) threshold to mechanical stimuli over time
Individual data showing the PW threshold (g)
Ctrl-ipsi
Days	mouse 1	mouse 2	mouse 3	mouse 4	mouse 5	mouse 6	mouse 7	mouse 8	mouse 9	mouse 10	mouse 11	mouse 12	mouse 13	mouse 14	mouse 15	mouse 16	mouse 17	mouse 18	mouse 19	mouse 20	mouse 21	mouse 22	mouse 23	mouse 24	mouse 25	mouse 26
BL	0.4	0.4	0.4	0.6	0.4	0.4	0.4	0.4	0.4	0.4	0.4	0.4	0.4	0.4	0.4	0.4	0.4	0.4	0.16	0.4	0.16	0.4	0.4	0.4	0.4	0.4
4hr	0.16	0.6	0.6	0.16	0.4	0.6	0.4	0.16	0.07	0.16	0.4	0.4	0.4	0.4	0.16	0.16	0.07	0.16	0.07	0.4	0.16	0.4	0.4	0.4	0.4	0.4
1	0.6	0.6	0.4	0.4	0.4	0.4	0.4	0.4	0.4	0.4	0.4	0.4	0.4	0.4	0.4	0.4	0.4	0.07	0.16	0.4	0.07	0.4	0.4	0.4	0.4	0.04
3	0.6	0.16	0.6	0.4	0.16	0.4	0.4	0.4	0.4	0.4	0.4	0.4	0.4	0.16	0.4	0.4	0.4	0.4	0.4	0.4	0.16	0.4	0.4	0.4	0.4	0.4
4hr	0.4	0.4	0.6	0.4	0.4	0.4	0.4	0.4	0.4	0.07	0.4	0.4	0.4	0.4	0.4	0.4	0.16	0.16	0.16	0.4	0.04	0.16	0.4	0.4	0.4	0.16
4	0.4	0.4	0.4	0.4	0.4	0.4	0.4	0.4	0.4	0.4	0.4	0.4	0.4	0.4	0.4	0.4	0.16	0.4	0.4	0.4	0.4	0.4	0.4	0.4	0.4	0.16
6	0.4	0.4	0.4	0.4	0.16	0.4	0.4	0.4	0.4	0.16	0.4	0.4	0.4	0.4	0.4	0.4	0.16	0.16	0.4	0.4	0.16	0.4	0.4	0.4	0.4	0.16
10	0.4	0.4	0.4	0.4	0.6	0.4	0.4	0.4	0.4	0.4	0.4	0.4	0.4	0.4	0.4	0.4	0.4	0.16	0.4	0.4	0.16	0.4	0.4	0.16	0.4	0.16
14	0.6	0.4	0.6	0.4	0.4	0.4	0.4	0.4	0.4	0.4	0.4	0.4	0.4	0.4	0.4	0.4	0.4	0.4	0.16	0.4	0.4	0.4	0.4	0.16	0.4	0.16
Ctrl-contra
Days	mouse 1	mouse 2	mouse 3	mouse 4	mouse 5	mouse 6	mouse 7	mouse 8	mouse 9	mouse 10	mouse 11	mouse 12	mouse 13	mouse 14	mouse 15	mouse 16	mouse 17	mouse 18	mouse 19	mouse 20	mouse 21	mouse 22	mouse 23	mouse 24	mouse 25	mouse 26
BL	0.16	0.4	0.4	0.16	0.4	0.6	0.6	0.4	0.4	0.4	0.4	0.4	0.4	0.4	0.4	0.4	0.4	0.4	0.4	0.4	0.4	0.4	0.4	0.4	0.4	0.4
4hr	0.6	0.6	0.4	0.4	0.6	0.6	0.6	0.4	0.4	0.16	0.4	0.4	0.07	0.4	0.4	0.4	0.4	0.4	0.16	0.4	0.4	0.4	0.4	0.16	0.4	0.4
1	0.4	0.6	0.4	0.4	0.6	0.4	0.6	0.4	0.4	0.4	0.4	0.4	0.16	0.4	0.4	0.16	0.4	0.4	0.4	0.4	0.4	0.4	0.4	0.4	0.4	0.4
3	0.6	0.6	0.4	0.4	0.6	0.6	0.4	0.4	0.6	0.4	0.4	0.4	0.16	0.4	0.4	0.4	0.4	0.4	0.4	0.4	0.4	0.4	0.4	0.4	0.4	0.07
4hr	0.6	0.4	0.4	0.4	0.4	0.6	0.6	0.4	0.6	0.4	0.4	0.4	0.16	0.4	0.4	0.4	0.4	0.4	0.4	0.4	0.4	0.4	0.4	0.4	0.6	0.4
4	0.6	0.4	0.4	0.4	0.6	0.6	0.4	0.4	0.4	0.4	0.4	0.4	0.16	0.4	0.4	0.4	0.4	0.4	0.4	0.4	0.4	0.16	0.4	0.16	0.4	0.4
6	0.6	0.4	0.4	0.4	0.6	0.4	0.6	0.4	0.4	0.4	0.4	0.4	0.16	0.4	0.4	0.4	0.4	0.16	0.4	0.4	0.16	0.16	0.4	0.4	0.4	0.4
10	0.6	0.4	0.4	0.4	0.6	0.4	0.4	0.4	0.4	0.4	0.4	0.4	0.16	0.4	0.4	0.4	0.4	0.4	0.4	0.4	0.16	0.4	0.4	0.16	0.4	0.4
14	0.6	0.4	0.6	0.4	0.4	0.4	0.4	0.4	0.4	0.4	0.4	0.4	0.16	0.4	0.4	0.4	0.4	0.4	0.16	0.4	0.4	0.4	0.4	0.16	0.4	0.4
MP-ipsi
Days	mouse 1	mouse 2	mouse 3	mouse 4	mouse 5	mouse 6	mouse 7	mouse 8	mouse 9	mouse 10	mouse 11	mouse 12	mouse 13	mouse 14	mouse 15	mouse 16	mouse 17	mouse 18	mouse 19	mouse 20	mouse 21	mouse 22	mouse 23	mouse 24	mouse 25	mouse 26	mouse 27	mouse 28
BL	0.6	0.6	0.4	0.6	0.4	0.4	0.16	0.6	0.4	0.4	0.4	0.4	0.4	0.16	0.16	0.4	0.4	0.16	0.4	0.4	0.4	0.4	0.16	0.4	0.4	0.4	0.4	0.16
4hr	0.16	0.16	0.16	0.16	0.04	0.16	0.07	0.07	0.07	0.04	0.04	0.04	0.04	0.04	0.04	0.04	0.04	0.04	0.04	0.16	0.04	0.04	0.04	0.04	0.04	0.16	0.04	0.04
1	0.6	0.4	0.4	0.4	0.4	0.4	0.16	0.6	0.4	0.04	0.04	0.04	0.04	0.04	0.04	0.04	0.07	0.04	0.04	0.4	0.04	0.4	0.07	0.04	0.04	0.16	0.07	0.07
3	0.4	0.4	0.4	0.6	0.4	0.4	0.16	0.4	0.4	0.16	0.16	0.16	0.4	0.4	0.16	0.4	0.16	0.04	0.04	0.4	0.4	0.4	0.16	0.4	0.07	0.4	0.4	0.16
4hr	0.16	0.16	0.16	0.16	0.07	0.16	0.16	0.07	0.07	0.04	0.04	0.04	0.04	0.04	0.04	0.04	0.04	0.04	0.04	0.4	0.04	0.16	0.04	0.04	0.04	0.16	0.04	0.04
4	0.16	0.16	0.16	0.16	0.07	0.16	0.07	0.16	0.07	0.04	0.04	0.04	0.04	0.04	0.04	0.04	0.04	0.04	0.04	0.4	0.04	0.16	0.04	0.04	0.04	0.16	0.04	0.04
6	0.16	0.16	0.16	0.16	0.07	0.16	0.07	0.07	0.07	0.04	0.04	0.04	0.04	0.04	0.04	0.04	0.04	0.04	0.04	0.4	0.04	0.07	0.04	0.04	0.04	0.16	0.04	0.04
10	0.07	0.07	0.16	0.07	0.07	0.16	0.07	0.07	0.07	0.04	0.04	0.04	0.04	0.04	0.04	0.04	0.04	0.04	0.04	0.16	0.04	0.07	0.04	0.04	0.04	0.4	0.04	0.04
14	0.07	0.16	0.16	0.16	0.07	0.16	0.07	0.07	0.07	0.04	0.04	0.04	0.04	0.04	0.04	0.04	0.04	0.04	0.04	0.16	0.04	0.07	0.04	0.04	0.04	0.4	0.04	0.04
MP-contra
Days	mouse 1	mouse 2	mouse 3	mouse 4	mouse 5	mouse 6	mouse 7	mouse 8	mouse 9	mouse 10	mouse 11	mouse 12	mouse 13	mouse 14	mouse 15	mouse 16	mouse 17	mouse 18	mouse 19	mouse 20	mouse 21	mouse 22	mouse 23	mouse 24	mouse 25	mouse 26	mouse 27	mouse 28
BL	0.4	0.4	0.16	0.4	0.16	0.6	0.16	0.4	0.6	0.4	0.4	0.4	0.07	0.4	0.4	0.4	0.4	0.07	0.07	0.4	0.4	0.4	0.4	0.4	0.4	0.4	0.4	0.04
4hr	0.4	0.16	0.07	0.16	0.07	0.16	0.07	0.16	0.4	0.04	0.04	0.16	0.04	0.04	0.04	0.04	0.04	0.04	0.04	0.04	0.04	0.07	0.07	0.04	0.04	0.16	0.04	0.04
1	0.16	0.4	0.4	0.4	0.16	0.4	0.16	0.4	0.4	0.07	0.4	0.4	0.04	0.04	0.04	0.04	0.07	0.04	0.04	0.07	0.04	0.16	0.4	0.04	0.04	0.16	0.07	0.07
3	0.4	0.16	0.4	0.4	0.4	0.4	0.16	0.4	0.4	0.4	0.4	0.4	0.07	0.4	0.16	0.16	0.4	0.04	0.04	0.4	0.4	0.4	0.04	0.4	0.07	0.4	0.4	0.16
4hr	0.16	0.16	0.16	0.16	0.07	0.16	0.07	0.07	0.07	0.04	0.04	0.04	0.04	0.04	0.04	0.04	0.04	0.04	0.04	0.04	0.04	0.16	0.04	0.04	0.04	0.07	0.04	0.04
4	0.07	0.16	0.16	0.16	0.4	0.4	0.16	0.16	0.4	0.04	0.04	0.04	0.04	0.04	0.04	0.04	0.04	0.04	0.04	0.04	0.04	0.16	0.04	0.04	0.04	0.16	0.04	0.04
6	0.16	0.16	0.07	0.16	0.07	0.16	0.16	0.07	0.07	0.04	0.04	0.04	0.04	0.04	0.04	0.04	0.04	0.04	0.04	0.04	0.04	0.4	0.04	0.04	0.04	0.16	0.04	0.04
10	0.16	0.07	0.07	0.07	0.07	0.16	0.07	0.07	0.07	0.04	0.04	0.04	0.04	0.04	0.04	0.04	0.04	0.04	0.04	0.04	0.04	0.07	0.04	0.04	0.04	0.07	0.04	0.04
14	0.16	0.16	0.07	0.16	0.07	0.16	0.07	0.07	0.07	0.04	0.04	0.04	0.04	0.04	0.04	0.04	0.04	0.04	0.04	0.04	0.04	0.07	0.04	0.04	0.04	0.07	0.04	0.04

## Sheet: Figure 1C
The PW responses to different filaments on day 14
Individual data showing the PW response (%)
Ctrl-ipsi
Von Frey stimulation (g)	mouse 1	mouse 2	mouse 3	mouse 4	mouse 5	mouse 6	mouse 7	mouse 8
0.04	0	0	0	0	0	0	0	0
0.07	0	0	0	0	0	0	0	0
0.16	0	40	40	20	20	20	20	0
0.4	40	80	40	60	60	80	40	20
0.6	60	100	60	80	100	100	100	60
1	100	100	100	100	100	100	100	100
Ctrl-contra
Von Frey stimulation (g)	mouse 1	mouse 2	mouse 3	mouse 4	mouse 5	mouse 6	mouse 7	mouse 8
0.04	0	0	0	0	0	0	0	0
0.07	0	0	0	0	0	0	0	20
0.16	0	40	0	40	0	20	20	20
0.4	40	40	40	40	20	40	40	60
0.6	80	60	80	60	60	100	80	100
1	100	60	100	100	100	100	100	100
MP-ipsi
Von Frey stimulation (g)	mouse 1	mouse 2	mouse 3	mouse 4	mouse 5	mouse 6	mouse 7	mouse 8	mouse 9
0.04	60	0	0	0	0	80	60	80	60
0.07	60	60	40	20	60	80	60	80	60
0.16	100	80	60	40	80	60	80	80	100
0.4	100	100	80	60	100	80	100	100	100
0.6	100	100	100	100	100	100	100	100	100
1	100	100	100	100	100	100	100	100	100
MP-contra
Von Frey stimulation (g)	mouse 1	mouse 2	mouse 3	mouse 4	mouse 5	mouse 6	mouse 7	mouse 8	mouse 9
0.04	60	100	80	60	60	80	60	20	20
0.07	60	80	60	80	60	80	80	80	60
0.16	60	80	100	60	80	80	80	100	100
0.4	80	100	80	80	100	100	100	100	100
0.6	100	100	100	100	100	100	100	100	100
1	100	100	100	100	100	100	100	100	100

## Sheet: Figure 1E
The effects of PGB treatment on PW threshold in Ctrl and MP groups
Individual data showing the PW threshold (%)
Ctrl-ipsi
Days	mouse 1	mouse 2	mouse 3	mouse 4	mouse 5	mouse 6	mouse 7	mouse 8	mouse 9	mouse 10	mouse 11	mouse 12	mouse 13
BL	0.4	0.4	0.4	0.6	0.4	0.4	0.4	0.6	0.4	0.4	0.4	0.6	0.4
4hr	0.4	0.4	0.4	0.6	0.4	0.4	0.4	0.6	0.4	0.4	0.4	0.6	0.16
1	0.16	0.4	0.4	0.6	0.4	0.4	0.4	0.6	0.4	0.4	0.4	0.6	0.4
3	0.4	0.4	0.4	0.6	0.4	0.4	0.4	0.6	0.4	0.4	0.4	0.6	0.4
4hr	0.16	0.4	0.4	0.6	0.4	0.4	0.4	0.6	0.4	0.4	0.4	0.6	0.4
4	0.16	0.4	0.4	0.6	0.4	0.4	0.4	0.6	0.4	0.4	0.4	0.6	0.4
6	0.4	0.4	0.4	0.4	0.4	0.4	0.4	0.4	0.4	0.4	0.4	0.6	0.4
10	0.4	0.4	0.4	0.6	0.4	0.4	0.4	0.4	0.4	0.4	0.4	0.6	0.4
14	0.4	0.4	0.4	0.4	0.4	0.4	0.4	0.6	0.4	0.4	0.4	0.6	0.4
15	0.4	0.4	0.4	0.4	0.4	0.4	0.4	0.6	0.4	0.4	0.4	0.6	0.4
16	0.4	0.4	0.4	0.4	0.4	0.4	0.6	0.6	0.4	0.4	0.4	0.6	0.16
18	0.16	0.4	0.4	0.4	0.4	0.4	0.4	0.6	0.4	0.4	0.4	0.6	0.16
19	0.4	0.4	0.4	0.6	0.4	0.4	0.4	0.6	0.4	0.4	0.4	0.6	0.4
Ctrl-contra
Days	mouse 1	mouse 2	mouse 3	mouse 4	mouse 5	mouse 6	mouse 7	mouse 8	mouse 9	mouse 10	mouse 11	mouse 12	mouse 13
BL	0.16	0.4	0.16	0.6	0.4	0.4	0.4	0.4	0.6	0.4	0.4	0.6	0.4
4hr	0.16	0.4	0.16	0.6	0.4	0.4	0.4	0.4	0.6	0.4	0.4	0.6	0.4
1	0.16	0.16	0.4	0.6	0.4	0.4	0.4	0.4	0.4	0.4	0.4	0.6	0.4
3	0.16	0.4	0.4	0.6	0.4	0.4	0.4	0.4	0.6	0.4	0.4	0.6	0.4
4hr	0.16	0.4	0.4	0.6	0.4	0.4	0.4	0.4	0.6	0.4	0.4	0.6	0.4
4	0.16	0.4	0.4	0.4	0.4	0.4	0.4	0.4	0.6	0.4	0.4	0.6	0.4
6	0.16	0.4	0.4	0.4	0.4	0.4	0.4	0.4	0.6	0.4	0.4	0.6	0.4
10	0.4	0.4	0.4	0.6	0.4	0.4	0.4	0.4	0.4	0.4	0.4	0.6	0.16
14	0.4	0.4	0.16	0.4	0.4	0.4	0.4	0.4	0.6	0.4	0.4	0.6	0.4
15	0.4	0.4	0.4	0.4	0.4	0.4	0.4	0.4	0.6	0.4	0.4	0.6	0.4
16	0.4	0.4	0.4	0.6	0.4	0.4	0.4	0.4	0.6	0.4	0.4	0.6	0.4
18	0.4	0.4	0.4	0.4	0.4	0.4	0.4	0.4	0.6	0.4	0.4	0.6	0.4
19	0.4	0.4	0.4	0.4	0.4	0.4	0.4	0.4	0.6	0.4	0.4	0.6	0.4
MP-ipsi
Days	mouse 1	mouse 2	mouse 3	mouse 4	mouse 5	mouse 6	mouse 7	mouse 8	mouse 9	mouse 10	mouse 11	mouse 12
BL	0.16	0.16	0.16	0.6	0.6	0.4	0.6	0.4	0.4	0.4	0.4	0.4
4hr	0.04	0.04	0.04	0.04	0.04	0.04	0.04	0.07	0.04	0.04	0.04	0.04
1	0.04	0.04	0.04	0.04	0.04	0.04	0.04	0.07	0.04	0.04	0.04	0.04
3	0.16	0.16	0.16	0.6	0.6	0.6	0.6	0.16	0.16	0.4	0.4	0.07
4hr	0.04	0.04	0.04	0.04	0.04	0.04	0.04	0.04	0.04	0.04	0.04	0.04
4	0.04	0.04	0.04	0.04	0.04	0.04	0.04	0.04	0.04	0.04	0.04	0.04
6	0.04	0.04	0.04	0.04	0.04	0.04	0.04	0.04	0.04	0.04	0.04	0.04
10	0.04	0.04	0.04	0.04	0.04	0.04	0.04	0.04	0.04	0.04	0.04	0.04
14	0.04	0.04	0.04	0.04	0.04	0.04	0.04	0.04	0.04	0.04	0.04	0.04
15	0.04	0.04	0.04	0.04	0.04	0.04	0.04	0.04	0.04	0.04	0.04	0.04
16	0.16	0.07	0.4	0.4	0.4	0.4	0.4	0.4	0.4	0.4	0.4	0.4
18	0.04	0.04	0.04	0.04	0.04	0.04	0.04	0.04	0.04	0.04	0.04	0.04
19	0.16	0.16	0.4	0.4	0.4	0.4	0.4	0.4	0.4	0.4	0.4	0.4
MP-contra
Days	mouse 1	mouse 2	mouse 3	mouse 4	mouse 5	mouse 6	mouse 7	mouse 8	mouse 9	mouse 10	mouse 11	mouse 12
BL	0.16	0.4	0.4	0.6	0.4	0.4	0.6	0.4	0.6	0.4	0.4	0.4
4hr	0.04	0.04	0.04	0.04	0.04	0.04	0.04	0.04	0.04	0.04	0.04	0.04
1	0.04	0.04	0.04	0.04	0.04	0.04	0.04	0.04	0.04	0.07	0.04	0.04
3	0.16	0.16	0.16	0.4	0.4	0.4	0.4	0.16	0.4	0.4	0.4	0.4
4hr	0.04	0.04	0.04	0.04	0.04	0.04	0.04	0.04	0.04	0.04	0.04	0.04
4	0.04	0.04	0.04	0.04	0.04	0.04	0.04	0.04	0.04	0.04	0.04	0.04
6	0.04	0.04	0.04	0.04	0.04	0.04	0.04	0.04	0.04	0.04	0.04	0.04
10	0.04	0.04	0.04	0.04	0.04	0.04	0.04	0.04	0.04	0.04	0.04	0.04
14	0.04	0.04	0.04	0.04	0.04	0.04	0.04	0.04	0.04	0.04	0.04	0.04
15	0.04	0.04	0.04	0.04	0.04	0.04	0.04	0.04	0.04	0.04	0.04	0.04
16	0.16	0.16	0.4	0.4	0.16	0.4	0.4	0.4	0.4	0.4	0.4	0.4
18	0.04	0.04	0.04	0.04	0.04	0.04	0.04	0.04	0.04	0.04	0.04	0.04
19	0.16	0.07	0.16	0.4	0.4	0.4	0.4	0.4	0.6	0.4	0.4	0.4

## Sheet: Figure 1F
The effects of PGB treatment at primed state on PW threshold in ACSF and PGB groups
Individual data showing the PW threshold (%)
MP-ipsi-ACSF
Days	mouse 1	mouse 2	mouse 3	mouse 4	mouse 5	mouse 6	mouse 7	mouse 8
BL	0.6	0.4	0.4	0.4	0.4	0.16	0.4	0.4
4hr	0.04	0.04	0.04	0.04	0.04	0.04	0.04	0.04
1	0.04	0.04	0.04	0.04	0.04	0.04	0.04	0.04
3	0.4	0.4	0.4	0.4	0.4	0.16	0.4	0.4
4hr	0.04	0.04	0.04	0.04	0.04	0.04	0.04	0.04
4	0.04	0.04	0.04	0.04	0.04	0.04	0.04	0.04
6	0.04	0.04	0.04	0.04	0.04	0.04	0.04	0.04
10	0.04	0.04	0.04	0.04	0.04	0.04	0.04	0.04
14	0.04	0.04	0.04	0.04	0.04	0.04	0.04	0.04
MP-contra-ACSF
Days	mouse 1	mouse 2	mouse 3	mouse 4	mouse 5	mouse 6	mouse 7	mouse 8
BL	0.6	0.4	0.4	0.4	0.4	0.4	0.4	0.4
4hr	0.04	0.04	0.04	0.04	0.04	0.04	0.04	0.04
1	0.07	0.04	0.04	0.04	0.04	0.04	0.04	0.04
3	0.4	0.4	0.4	0.4	0.4	0.16	0.4	0.4
4hr	0.04	0.04	0.04	0.04	0.4	0.04	0.04	0.04
4	0.04	0.04	0.04	0.04	0.4	0.04	0.04	0.04
6	0.04	0.04	0.04	0.04	0.4	0.04	0.04	0.04
10	0.04	0.04	0.04	0.04	0.4	0.04	0.04	0.04
14	0.04	0.04	0.04	0.04	0.4	0.04	0.04	0.04
MP-ipsi-PGB
Days	mouse 1	mouse 2	mouse 3	mouse 4	mouse 5	mouse 6	mouse 7	mouse 8	mouse 9
BL	0.6	0.4	0.6	0.4	0.6	0.4	0.16	0.6	0.16
4hr	0.04	0.04	0.04	0.04	0.04	0.04	0.04	0.04	0.04
1	0.04	0.04	0.04	0.04	0.04	0.04	0.07	0.04	0.04
3	0.4	0.16	0.4	0.4	0.4	0.4	0.16	0.6	0.16
4hr	0.4	0.16	0.4	0.4	0.4	0.4	0.07	0.07	0.16
4	0.4	0.16	0.4	0.4	0.4	0.4	0.07	0.16	0.16
6	0.4	0.16	0.4	0.4	0.4	0.4	0.07	0.07	0.16
10	0.4	0.16	0.4	0.4	0.4	0.4	0.07	0.07	0.07
14	0.4	0.16	0.4	0.4	0.4	0.4	0.07	0.16	0.16
MP-contra-PGB
Days	mouse 1	mouse 2	mouse 3	mouse 4	mouse 5	mouse 6	mouse 7	mouse 8	mouse 9
BL	0.6	0.4	0.4	0.6	0.6	0.4	0.16	0.6	0.4
4hr	0.04	0.04	0.04	0.04	0.04	0.04	0.04	0.04	0.04
1	0.04	0.04	0.04	0.04	0.04	0.04	0.07	0.04	0.04
3	0.4	0.4	0.4	0.4	0.4	0.4	0.16	0.6	0.16
4hr	0.4	0.4	0.4	0.4	0.4	0.4	0.16	0.4	0.16
4	0.4	0.4	0.4	0.4	0.4	0.4	0.16	0.4	0.16
6	0.4	0.4	0.4	0.4	0.4	0.4	0.07	0.4	0.16
10	0.4	0.4	0.4	0.4	0.4	0.4	0.16	0.4	0.16
14	0.4	0.4	0.4	0.4	0.4	0.4	0.16	0.4	0.16
