# Supplementary material for: Cellular mechanisms underlying central sensitization in a mouse model of chronic muscle pain
Source: eLife. 2022 Nov 15;11:e78610. doi: 10.7554/eLife.78610 (PMC9665847; doi:10.7554/eLife.78610)
Supplement: Figure 2—figure supplement 1—source data 1. [file elife-78610-fig2-figsupp1-data1.xlsx]

## Sheet: Figure 2- Figure supplement 1A
The paw withdrawal (PW) threshold to mechanical stimuli over time
Individual data showing the PW threshold (g)
MP-ipsi
	Day 0	3 hr	Day 1	Day 3	3 hr	Day 4	Day 6	Day 10	Day 14	Day 15	Day 16	Day 18	Day 19
m1	0.16	0.04	0.04	0.16	0.04	0.04	0.04	0.04	0.04	0.04	0.16	0.04	0.16
m3	0.16	0.04	0.04	0.16	0.04	0.04	0.04	0.04	0.04	0.04	0.07	0.04	0.16
m11	0.16	0.04	0.04	0.16	0.04	0.04	0.04	0.04	0.04	0.04	0.4	0.04	0.4
m14	0.6	0.04	0.04	0.6	0.04	0.04	0.04	0.04	0.04	0.04	0.4	0.04	0.4
m20	0.4	0.04	0.04	0.6	0.04	0.04	0.04	0.04	0.04	0.04	0.4	0.04	0.4
m21	0.6	0.04	0.04	0.6	0.04	0.04	0.04	0.04	0.04	0.04	0.4	0.04	0.4
m31	0.4	0.07	0.07	0.16	0.04	0.04	0.04	0.04	0.04	0.04	0.4	0.04	0.4
m33	0.4	0.04	0.04	0.16	0.04	0.04	0.04	0.04	0.04	0.04	0.4	0.04	0.4
MP-contra
	Day 0	3 hr	Day 1	Day 3	3 hr	Day 4	Day 6	Day 10	Day 14	Day 15	Day 16	Day 18	Day 19
m1	0.16	0.04	0.04	0.16	0.04	0.04	0.04	0.04	0.04	0.04	0.16	0.04	0.16
m3	0.4	0.04	0.04	0.16	0.04	0.04	0.04	0.04	0.04	0.04	0.16	0.04	0.07
m11	0.4	0.04	0.04	0.16	0.04	0.04	0.04	0.04	0.04	0.04	0.4	0.04	0.16
m14	0.4	0.04	0.04	0.4	0.04	0.04	0.04	0.04	0.04	0.04	0.16	0.04	0.4
m20	0.4	0.04	0.04	0.4	0.04	0.04	0.04	0.04	0.04	0.04	0.4	0.04	0.4
m21	0.6	0.04	0.04	0.4	0.04	0.04	0.04	0.04	0.04	0.04	0.4	0.04	0.4
m31	0.4	0.04	0.04	0.16	0.04	0.04	0.04	0.04	0.04	0.04	0.4	0.04	0.4
m33	0.6	0.04	0.04	0.4	0.04	0.04	0.04	0.04	0.04	0.04	0.4	0.04	0.6
The normalized PW threshold to mechanical stimuli over time and the change of PW threshold
Individual data showing the normalized PW threshold (%)
MP-ipsi
	Day 0	3 hr	Day 1	Day 3	3 hr	Day 4	Day 6	Day 10	Day 14	Day 15	Day 16	Day 18	Day 19		Day19-18	Day16-15	(Day19-18)+(Day16-15)/2	(ipsi+contra)/2 average
m1	1	0.25	0.25	1	0.25	0.25	0.25	0.25	0.25	0.25	1	0.25	1		0.75	0.75	0.75	0.75
m3	1	0.25	0.25	1	0.25	0.25	0.25	0.25	0.25	0.25	0.4375	0.25	1		0.75	0.1875	0.46875	0.328125
m11	1	0.25	0.25	1	0.25	0.25	0.25	0.25	0.25	0.25	2.5	0.25	2.5		2.25	2.25	2.25	1.425
m14	1	0.0666667	0.0666667	1	0.0666667	0.0666667	0.0666667	0.0666667	0.0666667	0.0666667	0.666667	0.0666667	0.666667		0.6	0.6	0.6	0.6
m20	1	0.1	0.1	1.5	0.1	0.1	0.1	0.1	0.1	0.1	1	0.1	1		0.9	0.9	0.9	0.9
m21	1	0.0666667	0.0666667	1	0.0666667	0.0666667	0.0666667	0.0666667	0.0666667	0.0666667	0.666667	0.0666667	0.666667		0.6	0.6	0.6	0.6
m31	1	0.175	0.175	0.4	0.1	0.1	0.1	0.1	0.1	0.1	1	0.1	1		0.9	0.9	0.9	0.9
m33	1	0.1	0.1	0.4	0.1	0.1	0.1	0.1	0.1	0.1	1	0.1	1		0.9	0.9	0.9	0.833333
MP-contra
	Day 0	3 hr	Day 1	Day 3	3 hr	Day 4	Day 6	Day 10	Day 14	Day 15	Day 16	Day 18	Day 19		day19-18	day16-15	(day19-18)+(day16-15)/2
m1	1	0.25	0.25	1	0.25	0.25	0.25	0.25	0.25	0.25	1	0.25	1		0.75	0.75	0.75
m3	1	0.1	0.1	0.4	0.1	0.1	0.1	0.1	0.1	0.1	0.4	0.1	0.175		0.075	0.3	0.1875
m11	1	0.1	0.1	0.4	0.1	0.1	0.1	0.1	0.1	0.1	1	0.1	0.4		0.3	0.9	0.6
m14	1	0.1	0.1	1	0.1	0.1	0.1	0.1	0.1	0.1	0.4	0.1	1		0.9	0.3	0.6
m20	1	0.1	0.1	1	0.1	0.1	0.1	0.1	0.1	0.1	1	0.1	1		0.9	0.9	0.9
m21	1	0.0666667	0.0666667	0.666667	0.0666667	0.0666667	0.0666667	0.0666667	0.0666667	0.0666667	0.666667	0.0666667	0.666667		0.6	0.6	0.6
m31	1	0.1	0.1	0.4	0.1	0.1	0.1	0.1	0.1	0.1	1	0.1	1		0.9	0.9	0.9
m33	1	0.0666667	0.0666667	0.666667	0.0666667	0.0666667	0.0666667	0.0666667	0.0666667	0.0666667	0.666667	0.0666667	1		0.933333	0.6	0.766667
The changes of immobility time in the FST
Individual data showing the relative time of immobility (%)
	MP-ACSF	MP-PGB	ACSF-PGB
m1	66.67	33.33	33.34
m3	59.44	42.5	16.94
m11	55	39.44	15.56
m14	50.56	43.33	7.23
m20	59.32	57.35	1.97
m21	47.8	53.98	-6.18
m31	70.35	40.06	30.29
m33	65.83	50.69	15.14

## Sheet: Figure 2- Figure supplement 1B
The paw withdrawal (PW) threshold to mechanical stimuli over time
Individual data showing the PW threshold (g)
MP-ipsi
	Day 0	3 hr	Day 1	Day 3	3 hr	Day 4	Day 6	Day 10	Day 14	Day 15	Day 16	Day 18	Day 19
m1	0.16	0.04	0.04	0.16	0.04	0.04	0.04	0.04	0.04	0.04	0.16	0.04	0.16
m3	0.16	0.04	0.04	0.16	0.04	0.04	0.04	0.04	0.04	0.04	0.07	0.04	0.16
m11	0.16	0.04	0.04	0.16	0.04	0.04	0.04	0.04	0.04	0.04	0.4	0.04	0.4
m14	0.6	0.04	0.04	0.6	0.04	0.04	0.04	0.04	0.04	0.04	0.4	0.04	0.4
m20	0.4	0.04	0.04	0.6	0.04	0.04	0.04	0.04	0.04	0.04	0.4	0.04	0.4
m21	0.6	0.04	0.04	0.6	0.04	0.04	0.04	0.04	0.04	0.04	0.4	0.04	0.4
m31	0.4	0.07	0.07	0.16	0.04	0.04	0.04	0.04	0.04	0.04	0.4	0.04	0.4
m33	0.4	0.04	0.04	0.16	0.04	0.04	0.04	0.04	0.04	0.04	0.4	0.04	0.4
MP-contra
	Day 0	3 hr	Day 1	Day 3	3 hr	Day 4	Day 6	Day 10	Day 14	Day 15	Day 16	Day 18	Day 19
m1	0.16	0.04	0.04	0.16	0.04	0.04	0.04	0.04	0.04	0.04	0.16	0.04	0.16
m3	0.4	0.04	0.04	0.16	0.04	0.04	0.04	0.04	0.04	0.04	0.16	0.04	0.07
m11	0.4	0.04	0.04	0.16	0.04	0.04	0.04	0.04	0.04	0.04	0.4	0.04	0.16
m14	0.4	0.04	0.04	0.4	0.04	0.04	0.04	0.04	0.04	0.04	0.16	0.04	0.4
m20	0.4	0.04	0.04	0.4	0.04	0.04	0.04	0.04	0.04	0.04	0.4	0.04	0.4
m21	0.6	0.04	0.04	0.4	0.04	0.04	0.04	0.04	0.04	0.04	0.4	0.04	0.4
m31	0.4	0.04	0.04	0.16	0.04	0.04	0.04	0.04	0.04	0.04	0.4	0.04	0.4
m33	0.6	0.04	0.04	0.4	0.04	0.04	0.04	0.04	0.04	0.04	0.4	0.04	0.6
The normalized PW threshold to mechanical stimuli over time and the change of PW threshold
Individual data showing the normalized PW threshold (%)
MP-ipsi
	Day 0	3 hr	Day 1	Day 3	3 hr	Day 4	Day 6	Day 10	Day 14	Day 15	Day 16	Day 18	Day 19		Day19-18	Day16-15	(Day19-18)+(Day16-15)/2	(ipsi+contra)/2 average
m1	1	0.25	0.25	1	0.25	0.25	0.25	0.25	0.25	0.25	1	0.25	1		0.75	0.75	0.75	0.75
m3	1	0.25	0.25	1	0.25	0.25	0.25	0.25	0.25	0.25	0.4375	0.25	1		0.75	0.1875	0.46875	0.328125
m11	1	0.25	0.25	1	0.25	0.25	0.25	0.25	0.25	0.25	2.5	0.25	2.5		2.25	2.25	2.25	1.425
m14	1	0.0666667	0.0666667	1	0.0666667	0.0666667	0.0666667	0.0666667	0.0666667	0.0666667	0.666667	0.0666667	0.666667		0.6	0.6	0.6	0.6
m20	1	0.1	0.1	1.5	0.1	0.1	0.1	0.1	0.1	0.1	1	0.1	1		0.9	0.9	0.9	0.9
m21	1	0.0666667	0.0666667	1	0.0666667	0.0666667	0.0666667	0.0666667	0.0666667	0.0666667	0.666667	0.0666667	0.666667		0.6	0.6	0.6	0.6
m31	1	0.175	0.175	0.4	0.1	0.1	0.1	0.1	0.1	0.1	1	0.1	1		0.9	0.9	0.9	0.9
m33	1	0.1	0.1	0.4	0.1	0.1	0.1	0.1	0.1	0.1	1	0.1	1		0.9	0.9	0.9	0.833333
MP-contra
	Day 0	3 hr	Day 1	Day 3	3 hr	Day 4	Day 6	Day 10	Day 14	Day 15	Day 16	Day 18	Day 19		day19-18	day16-15	(day19-18)+(day16-15)/2
m1	1	0.25	0.25	1	0.25	0.25	0.25	0.25	0.25	0.25	1	0.25	1		0.75	0.75	0.75
m3	1	0.1	0.1	0.4	0.1	0.1	0.1	0.1	0.1	0.1	0.4	0.1	0.175		0.075	0.3	0.1875
m11	1	0.1	0.1	0.4	0.1	0.1	0.1	0.1	0.1	0.1	1	0.1	0.4		0.3	0.9	0.6
m14	1	0.1	0.1	1	0.1	0.1	0.1	0.1	0.1	0.1	0.4	0.1	1		0.9	0.3	0.6
m20	1	0.1	0.1	1	0.1	0.1	0.1	0.1	0.1	0.1	1	0.1	1		0.9	0.9	0.9
m21	1	0.0666667	0.0666667	0.666667	0.0666667	0.0666667	0.0666667	0.0666667	0.0666667	0.0666667	0.666667	0.0666667	0.666667		0.6	0.6	0.6
m31	1	0.1	0.1	0.4	0.1	0.1	0.1	0.1	0.1	0.1	1	0.1	1		0.9	0.9	0.9
m33	1	0.0666667	0.0666667	0.666667	0.0666667	0.0666667	0.0666667	0.0666667	0.0666667	0.0666667	0.666667	0.0666667	1		0.933333	0.6	0.766667
The changes of the number of buried marbles
Individual data showing the relative number of buried marbles (%)
		MP-ACSF	MP-PGB	ACSF-PGB/ACSF
m1		16	13	0.1875	0.1875
m3		16	12	0.25	0.25
m11		17	9	0.470588	0.470588
m14		14	10	0.285714	0.285714
m20		14	4	0.714286	0.714286
m21		12	7	0.416667	0.416667
m31		15	9	0.4	0.4
m33		16	5	0.6875	0.6875
