# Supplementary material for: Cellular mechanisms underlying central sensitization in a mouse model of chronic muscle pain
Source: eLife. 2022 Nov 15;11:e78610. doi: 10.7554/eLife.78610 (PMC9665847; doi:10.7554/eLife.78610)
Supplement: Figure 2—source data 1. [file elife-78610-fig2-data1.xlsx]

## Sheet: Figure 2B
The effects of PGB treatment on open-arm time and total distance
Individual data showing the open-arm time (%) of each mouse
mouse	Ctrl-ACSF		mouse	Ctrl-PGB
1	32.4232		1	14.1704
2	20.6406		2	27.7469
3	19.3339		3	17.699
4	45.2569		4	25.0445
5	30.6365		5	15.303
6	29.343
mouse	MP-ACSF		mouse	MP-PGB
1	12.7224		1	25.1382
2	3.69217		2	33.1128
3	7.68457		3	24.583
4	17.0874		4	53.0138
5	27.8019		5	56.1333
6	19.633		6	47.328
7	16.944		7	29.621
Individual data showing the total distance (m) of each mouse
mouse	Ctrl-ACSF		mouse	Ctrl-PGB
1	19.3824		1	19.1323
2	25.5886		2	29.5218
3	21.935		3	22.9376
4	18.059		4	24.8335
5	22.4238		5	18.0584
6	37.3462
mouse	MP-ACSF		mouse	MP-PGB
1	22.6529		1	26.08
2	17.6352		2	12.3586
3	25.0633		3	25.538
4	21.183		4	18.8084
5	23.5046		5	31.1842
6	20.3465		6	22.9948
7	19.4636		7	22.1169

## Sheet: Figure 2C
The effects of PGB treatment on the number of buried marbles
Individual data showing the number of buried marbles
	mouse	Ctrl-ACSF	Ctrl-PGB
	1	14	13
	2	14	8
	3	7	5
	4	11	9
	5	5	11
	6	2	5
	7	9	9
	8	9	10
	mouse	MP-ACSF	MP-PGB
	1	16	13
	2	16	12
	3	17	9
	4	14	10
	5	14	4
	6	12	7
	7	15	9
	8	16	5

## Sheet: Figure 2D
The effects of PGB treatment on the relative time of immobility in the FST
Individual data showing the relative time of immobility (%)
	mouse	Ctrl-ACSF	Ctrl-PGB
	1	26.11	33.12
	2	56.39	54.44
	3	43.61	46.39
	4	33.75	35.32
	5	57.47	54.52
	6	42.94	43.19
	7	47.7	46.32
	8	46.45	41.44
	9	43.43	60.01
	mouse	MP-ACSF	MP-PGB
	1	66.67	33.33
	2	59.44	42.5
	3	55	39.44
	4	54.38	47.71
	5	50.56	43.33
	6	59.32	57.35
	7	47.8	53.98
	8	65.83	50.69

## Sheet: Figure 2E
The effects of PGB treatment on the social-zone time
Individual data showing the social-zone time (%) of each mouse
mouse	Ctrl-ACSF		mouse	Ctrl-PGB
1	55.6272		1	41.776
2	49.0269		2	45.1957
3	51.3178		3	41.1366
4	47.8341		4	47.5182
5	41.2651		5	41.3262
6	22.4757		6	28.6404
			7	19.2202
mouse	MP-ACSF		mouse	MP-PGB
1	31.2945		1	47.665
2	36.7104		2	60.7818
3	42.371		3	55.7996
4	40.5138		4	56.7616
5	30.7482		5	42.8603
6	23.2979		6	27.4648
Individual data showing the total distance (m) of each mouse
mouse	Ctrl-ACSF		mouse	Ctrl-PGB
1	38.5787		1	21.1086
2	45.4246		2	32.437
3	47.4514		3	39.2661
4	33.4745		4	40.1275
5	41.7283		5	39.6668
6	47.179		6	33.5439
			7	40.389
mouse	MP-ACSF		mouse	MP-PGB
1	36.1664		1	39.145
2	32.4777		2	20.449
3	51.7657		3	42.0191
4	43.1995		4	39.5953
5	36.764		5	42.1356
6	36.8698		6	44.4205

## Sheet: Figure 2G
The effects of PGB treatment in a primed state on open-arm time and total distance
Individual data showing the open-arm time (%) of each mouse
mouse	MP-ACSF		mouse	MP-PGB
1	19.2615		1	56.0442
2	26.9517		2	55.0212
3	10.6567		3	48.7545
4	36.4657		4	55.5426
5	28.5309		5	22.4601
6	25.4187		6	17.357
7	13.2347		7	38.8033
8	16.2457		8	32.9923
			9	37.8302
Individual data showing the total distance (m) of each mouse
mouse	MP-ACSF		mouse	MP-PGB
1	30.8063		1	13.6832
2	21.8768		2	25.9318
3	12.5077		3	18.4222
4	17.4398		4	21.7889
5	25.6826		5	21.0384
6	25.4187		6	16.0645
7	13.2347		7	38.8033
8	16.2457		8	32.9923
			9	37.8302

## Sheet: Figure 2H
The effects of PGB treatment on the number of buried marbles
Individual data showing the number of buried marbles
	mouse	MP-ACSF	MP-PGB
	1	14	7
	2	15	11
	3	20	10
	4	21	12
	5	18	7
	6		7

## Sheet: Figure 2I
The effects of PGB treatment on the relative time of immobility in the FST
Individual data showing the relative time of immobility (%)
	mouse	MP-ACSF	MP-PGB
	1	52.15	42.3528
	2	55.2056	36.6222
	3	53.5472	51.6083
	4	55.6111	36.9028
	5	57.4528	42.5694
	6		36.0111

## Sheet: Figure 2J
The effects of PGB treatment on the social-zone time
Individual data showing the social-zone time (%) of each mouse
mouse	MP-ACSF		mouse	MP-PGB
1	31.7738		1	37.7224
2	40.347		2	48.9791
3	27.6897		3	45.4682
4	44.6739		4	46.3412
5	38.4863		5	40.7807
6	32.7458		6	43.8
7	23.322		7	45.1982
8	26.792		8	30.4677
			9	40.5272
Individual data showing the total distance (m) of each mice
mouse	MP-ACSF		mouse	MP-PGB
1	32.1546		1	34.4532
2	46.1121		2	51.4053
3	40.0005		3	28.7198
4	34.6735		4	42.289
5	46.2033		5	45.4692
6	41.7829		6	31.4522
7	41.7822		7	35.1902
8	35.9418		8	50.0685
			9	47.2223
