# Supplementary material for: Cellular mechanisms underlying central sensitization in a mouse model of chronic muscle pain
Source: eLife. 2022 Nov 15;11:e78610. doi: 10.7554/eLife.78610 (PMC9665847; doi:10.7554/eLife.78610)
Supplement: Figure 3—figure supplement 1—source data 1. [file elife-78610-fig3-figsupp1-data1.xlsx]

## Sheet: Figure3-Figure Supplement 1A
Cumulative probability of inter-event interval in the CeA-SST neurons																										mEPSC frequency in the CeA-SST neurons									Cumulative probability of amplitude in the CeA-SST neurons
Individual data showing the inter-event interval (ms) of each cell																										Individual data showing the mEPSC frequency (Hz) of each cell									Individual data showing the amplitude (pA) of each cell
Ctrl							MP																				Ctrl			MP					Ctrl							MP
cell 1	cell 2	cell 3	cell 4	cell 5	cell 6		cell 1	cell 2	cell 3	cell 4	cell 5	cell 6	cell 7	cell 8	cell 9	cell 10	cell 11	cell 12	cell 13	cell 14	cell 15	cell 16	cell 17				cell 1	0.89		cell 1	1.75				cell 1	cell 2	cell 3	cell 4	cell 5	cell 6		cell 1	cell 2	cell 3	cell 4	cell 5	cell 6	cell 7	cell 8
415.3	555.9	5.7	3691.1	42.5	631		1135.7	1494.9	225.8	152.899	5.8	14.4	59.5	783.9	14.7	22	407	431.9	323.4	408.9	1692.4	115.9	135.2				cell 2	0.7		cell 2	0.94				10.986	14.954	11.902	5.188	14.343	15.869		17.09	13.733	21.973	15.4653	10.2447	9.155	9.46	7.324
1201.7	149.7	1298.1	2995.8	82.6	1455.8		771.2	394.5	41.2	406.899	671.9	497.8	71.6	60	267.6	55.25	28.4	638.3	128.3	567.5	2241.5	110	564.4				cell 3	0.87		cell 3	1.44				16.785	28.992	5.798	12.817	12.207	11.902		14.343	12.512	13.428	15.1101	8.6725	7.019	10.071	8.545
440.7	348.6	84.7	692	519.1	963.1		778.6	287.1	354.9	892.906	156.2	83.1	214.7	260.8	737.4	96	833.3	232.5	211	639.3	1190.8	83.5	117				cell 4	3.95		cell 4	3.06				10.986	12.207	23.499	5.798	12.207	11.292		10.376	19.226	16.785	23.0933	8.46094	11.292	15.564	6.409
1982.6	236.7	98.8	1073.2	838.7	636.7		118.5	73.4	1016	113.797	191.3	218.2	397	108.2	164.2	729.25	701.4	28.3	661.4	404.9	3482.5	352.2	76.6				cell 5	1.51		cell 5	2.78				16.479	25.33	7.324	6.714	8.85	15.869		10.681	16.479	12.512	21.9257	11.4752	7.629	10.376	6.714
2217.3	159	245.8	735.5	65.8	82		749.1	911.8	51.8	347.797	620.2	867.7	97.1	150.1	330.7	104.5	158.2	118.4	1327.4	341.4	1554.9	545.9	87				cell 6	0.51		cell 6	2.59				11.597	14.648	5.798	19.836	12.817	10.986		11.597	13.428	17.7	11.7983	8.8583	6.409	14.038	9.766
5322.7	707.3	54.9	2914.2	473.2	27.6		142.5	641.9	1017.1	711.703	141.5	348.9	79	293.2	185.8	91.5	482.4	339.8	882.1	1010.2	3832.2	99.3	222.1							cell 7	3.22				6.409	6.714	7.019	6.409	13.428	13.123		11.597	12.512	10.986	12.3213	7.42221	16.479	12.817	19.226
1287	1979.2	1165.8	2269	83.5	535.4		199.8	673.4	1032.9	269.898	415.3	34.7	90.1	465.5	55.4	79	402	116.4	1235.3	57.9	480.5	93.2	70.8							cell 8	1.49				7.324	7.629	6.714	7.324	20.752	16.785		12.512	13.123	11.597	12.7023	9.70638	8.24	32.349	7.629
2479.9	472.6	3504.7	1988.5	204.2	154.3		1175.4	145.2	448.6	0.304688	561.3	318.7	195.7	11	669.9	33.5	51.1	410	386.3	138.1	2612.7	28.6	50.3							cell 9	3.52				37.231	7.629	7.324	7.324	23.499	16.785		9.766	29.297	12.817	12.7751	9.65012	9.46	12.817	7.935
2811.9	298.7	1019.8	2802.8	25.6	93.7		571.7	931.1	84.7	216.094	681.3	357.6	406.5	941.4	137.5	278.75	60.2	555	344.4	1819.9	1180.6	234.4	202.2							cell 10	2.58				7.935	7.019	27.771	5.188	21.362	10.986		9.46	17.7	11.902	10.9746	8.45985	8.545	23.804	15.564
3635.3	4254.2	2002.9	966.4	816.2	460.6		1469.9	37.5	289.7	538.601	137.8	1108.2	126.6	117.7	50.1	333.25	1169.4	549.6	1123.2	252.4	233.6	122.8	194							cell 11	1.09				6.104	9.46	6.104	6.104	22.583	16.479		9.766	14.038	11.292	16.67	9.88685	7.935	9.766	15.869
1640.5	197.3	1730.3	2009.2	70.8	1044.1		458.1	806.8	1848	183.602	831.2	419.8	62.3	547.3	113	812	493.3	551.6	847.6	272.6	668.5	190.8	49.9							cell 12	3.08276				5.798	6.104	17.395	6.409	7.019	17.09		16.174	12.817	15.564	16.5718	14.4267	10.681	10.071	9.766
1984.3	1089.2	6740.9	2416.5	380.3	120.2		194.1	1018	430.6	170.102	208.9	2357.7	640.2	646.9	367.2	153.5	23.8	310.7	273.8	101.9	1826.7	308.2	146.2							cell 13	2.38621				9.766	7.935	5.188	8.85	7.019	22.888		14.038	13.428	20.142	17.4159	13.7786	5.798	16.785	9.766
975.3	432.6	270.4	3075.2	843.2	223.9		250.2	606.4	266.3	404.898	561.8	708.5	100	746.7	94.7	150.5	939	15.6	438.2	142.6	521.2	141.2	243.4							cell 14	2.1931				9.46	7.629	7.629	9.155	6.714	12.512		14.648	13.733	12.207	22.8337	9.9131	5.798	17.395	8.545
121.2	1429.7	2174.2	904.5	58.3	797		1067.1	493.2	170.4	392.203	289.4	147.3	81.5	9.1	168.6	35.75	489.9	72.9	44.9	111.6	1410.6	544.1	32							cell 15	5.09				7.324	12.512	8.545	5.188	25.024	28.381		11.902	14.954	14.954	11.5791	10.3191	6.714	32.043	12.512
10804.4	357.4	64.9	4171.1	48.8	398.2		256.6	98.4	865.2	266.297	49.3003	633.9	203.2	32.9	152.8	37.75	1409.2	43.2	229.3	200.6	47.9	32.3	54.7							cell 16	2.00952				8.545	9.46	7.019	6.409	18.311	14.954		14.343	13.123	18.616	16.6994	11.4647	6.104	13.733	14.954
2117.7	53	1009.9	4175	33.5	881.7		60.6	583.4	157.1	117.5	81.6997	143.2	139.5	90	64.9	167.25	385.7	150	598.6	223.1	577.5	159.9	188.5							cell 17	3.87				7.324	6.714	5.493	5.798	13.733	37.842		9.155	11.902	17.09	14.0336	12.4551	14.343	24.719	10.681
6956.1	81.4	912.4	898.4	95.1	265.8		42.8	34	324.7	153.5	79.8003	409.7	687.8	62.4	150.1	126.75	74.3	358.6	2256.3	494.8	1021.4	95.3	53.2												6.714	14.954	7.629	5.188	7.629	17.395		10.071	11.902	12.817	11.2802	10.9072	10.681	13.123	15.869
4021.4	46.9	6995.7	1021.8	308.8	563.4		169.1	763.7	149.8	284.102	76.1997	466.9	78	126.8	196.4	98.75	377.2	347	73	1015.4	279.7	318.7	147.2												6.714	8.545	9.766	6.409	17.09	22.278		9.46	15.259	11.597	18.4472	11.1853	16.785	31.128	7.935
6035	1697.7	567.3	2996.8	42.7	43.8		145.8	1028.4	273.6	480	101.3	52.7	35	632	699.8	462.5	831.8	266.2	436.2	200.1	761.9	525.9	234.4												7.019	13.428	4.883	21.362	30.518	14.954		10.681	17.395	12.207	10.0402	8.92487	10.681	10.376	14.648
10984.8	384	3473.1	1583.3	61.6	1096.3		610.3	761.2	92.5	130.602	1070.1	43.4	209	175.5	49.4	135.5	1922.6	234.6	833	994.7	5377.8	132.6	176.5												7.629	7.935	6.409	14.343	32.349	37.231		9.155	20.752	11.902	21.8713	8.95697	8.545	14.954	10.681
1051.7	1493.4	83	1115.1	52.7	83.3		702.9	89.4	438.6	369.5	0.600098	222.1	165.8	1132	105.9	43	17	303	461.9	124.4	793.1	81.7	46.6												10.376	11.902	5.493	5.493	15.869	29.602		11.597	12.207	14.038	25.1466	9.02948	14.954	9.766	8.545
5925.8	209.4	2314.9	4284.5	146.1	26.4		204.8	72.5	187.9	68	0.300293	177.8	233.2	244.1	185.2	343.5	612.2	70	123	578.9	1429.6	210.1	66.7												7.324	6.409	8.24	14.343	11.902	32.349		10.071	16.174	16.174	10.6477	8.95923	12.817	9.155	10.071
7859.5	955	195.9	501.3	283.8	20.2		223.5	1024.2	1285.6	242.195	41.3999	845.4	17.2	546	195.9	131.75	175.4	148.8	1577.4	234.1	563.4	71.1	55.4												9.155	19.836	11.902	13.733	15.564	19.531		9.155	18.005	13.123	15.9782	14.9212	10.376	9.766	7.019
6759.8	240.1	1426.3	2112.1	65.2	41.5		647.2	1499	297.6	496.703	112.8	159.1	214.8	474	130.9	71.25	358.5	275.7	1137.4	676.9	506.3	104.8	178												8.85	6.104	6.104	9.766	34.18	13.123		10.071	15.869	10.986	11.5301	9.54564	10.376	11.902	6.714
3684.4	2252.7	1865.2	1815.5	356.4	169		149	637.1	1214.6	233.5	63.7002	1013.6	31.8	296.5	93.8	182.25	2086.3	612.8	147.7	225.1	345.6	197	38.4												5.798	10.071	7.324	11.902	17.395	20.752		9.46	16.479	16.479	13.8055	10.6565	14.343	27.466	9.766
2130.1	2574.3	775.5	441.5	612	8.2		129.6	464.8	515.3	75.8984	267.5	428.1	367.9	63	49	57	1303	242.6	734.9	494.8	111.5	394.6	357												7.629	6.714	4.883	7.935	26.245	25.94		9.766	11.292	14.343	21.1606	11.021	21.667	9.766	25.635
1395.2	841.8	379.5	4020.5	812.4	133.9		149.4	1599.6	1144.8	158.102	1426.4	541.2	71.9	203.8	496.1	373.75	226.1	305.5	425.6	99	275.5	603.6	136.1												10.071	6.409	5.188	6.714	16.174	11.292		19.531	14.343	12.207	21.4737	10.312	13.123	11.597	6.714
248.1	2468.8	959.4	1649.4	52.3	1358.2		264.7	1785.2	423.8	32.1953	425.1	142	806.1	24	334.5	270.5	115.9	1039.4	83.7	1186.2	251.4	25.6	177.5												12.817	17.7	10.986	11.597	17.7	11.292		11.597	12.817	11.597	31.2622	9.96061	11.902	14.954	12.512
518.7	774	35.7	2015	35	86.4		1162.7	1012.7	13.9	207.203	353.101	406.2	61.7	718	454.4	80.5	480.4	48	522.5	212.7	281	92.9	167.2												5.798	6.409	6.409	7.019	14.648	10.986		12.817	14.038	16.479	9.03675	20.5346	8.85	18.005	7.629
3122.6	312.4	2003.2	192.7	76	338		6.3	737.3	326.2	578.602	256	420.1	225.5	152.9	211.9	80.25	1752.9	427	645.1	119.8	852.9	72.9	229												6.409	10.376	5.798	9.46	37.537	18.005		9.46	12.207	21.667	8.87706	15.8915	14.343	11.597	8.85
1988.3	147.8	1190	5906.5	585.8	836.8		321.5	588.6	346.4	104.297	584	63.5	226.6	486.4	69.8	136	149.2	534.5	157.5	70.4	233.5	351.2	79.2												5.798	11.597	13.123	7.629	21.667	18.616		10.376	19.836	14.343	15.1373	6.70297	5.798	12.512	7.935
596.3	1602.9	2413.2	702.4	118.4	487.9		247.2	475	120.9	121.703	427.8	209.8	105	525.5	621.1	122.5	53.4	283	65	137	1193.8	101	647.1												7.019	7.629	6.714	7.324	21.667	22.888		11.597	25.94	11.597	19.2639	11.214	7.935	44.25	7.935
120.7	2348.1	614.9	553.1	122.1	51.9		186.3	1572.8	309.2	40.5	757.9	497.2	44.4	303.6	340.9	20.25	616.1	402.6	1613.1	195.3	1077.1	463.1	133.2												5.798	7.629	8.24	12.512	22.888	32.349		8.85	13.123	29.907	15.4242	14.3291	6.409	19.226	18.616
1671.8	798.7	9.2	2061.8	48.7	903.5		672.2	315.5	603.1	165.5	122.199	24	397.1	265.8	187.4	160.25	1564.4	145.7	271.5	828.9	1814.1	260.1	155.5												6.104	6.104	6.409	7.324	22.888	11.902		10.681	14.954	24.414	17.277	12.9596	42.419	11.292	7.629
700.8	1259.8	1823.6	5166.1	822	78.3		242.7	678.2	46.1	406.602	1585.7	60.2	139	60.4	57.3	101.25	244.4	462.9	1377	1074.4	857	85.9	109.8												5.798	7.935	6.409	13.733	8.24	25.635		9.155	32.349	11.597	22.2775	12.3549	7.629	20.447	8.24
396.7	2436.2	4582.2	220.6	85.7	643		33.2	1463.5	82.5	43.1953	182.7	2164.1	354	142.4	30.5	122.25	2132.5	168.3	2046.7	50.6	1925.8	249.9	142												7.629	10.376	10.376	5.493	36.011	13.123		10.986	23.499	17.7	11.9029	11.1464	13.733	21.362	12.207
68.4	1000	2191.4	2014.1	393.4	19.8		912.3	840.7	208.5	262	264.9	91.2	11.6	70.6	118.6	152.25	239	50.1	30.3	25.3	54.2	55.6	160.6												6.104	8.24	24.719	8.24	10.071	12.207		8.85	13.123	12.512	10.475	9.7946	8.545	10.071	8.85
1205.6	300.4	297.1	111.4	376.7	394.9		19.2	72	408.8	169.203	501.8	139.9	19.9	690.7	301	155.75	492.3	173.2	903.2	130.2	816.3	48.4	202.5												9.155	36.316	4.883	6.409	9.766	12.817		19.226	10.986	18.311	18.9868	13.3809	14.038	9.46	7.935
1417.4	1493.5	2691.5	2692.4	75.4	593.8		703	62	598	233.5	215.899	904.6	56.1	211.7	369.3	153.25	1489.3	223.4	211.2	613.3	869.7	291.5	267.2												10.986	7.324	5.188	12.817	18.616	13.123		10.071	16.174	13.733	9.35764	8.1677	6.714	43.03	9.766
1592.2	280.8	2108.9	575.9	37.7	1106.2		1167.8	905.3	24.4	32.8984	0.300781	204.5	157.7	19.7	325.6	83.25	58.4	58.7	348.6	49	1367.5	231.5	151.4												5.798	25.635	11.597	6.104	18.005	14.343		10.986	22.583	14.648	12.6318	8.23491	11.597	21.362	7.629
1509.1	1700.4	130.3	1255.3	402.6	556.9		334.1	1426.5	261	67.2969	99.5996	319	783.8	1213.8	498	34.25	1537.8	104.7	867.7	48.9	515.8	221.4	179.2												6.409	9.155	7.324	5.798	6.714	21.973		10.071	12.817	11.902	13.1063	10.0172	8.545	15.259	8.545
1202.2	824.8	213.8	2864.8	41.3	1433.4		381.1	522.7	115.7	133.305	251.9	260.8	63.2	66.3	123.8	108.25	519.1	124	711.7	73.6	200.5	0.6	13.3												7.019	8.24	13.123	7.324	13.428	28.076		13.123	18.005	15.564	14.3127	11.0061	6.714	9.46	14.343
123	748	637	398.7	16.5	569		62.4	675.2	430.9	531.398	253.399	583.8	182.9	78	62.4	54.5	2043.7	243.5	102.1	4969	2283.5	223.6	57.7												5.798	10.681	6.714	5.798	9.155	14.954		15.564	15.259	14.343	11.5445	11.3774	7.935	23.499	20.447
43.7	1572.8	3721.5	6740.5	365.4	1102.9		324.1	622.7	228.8	319.602	793.601	150.1	98.4	361.3	147.3	621.5	3292.6	119.8	267.4	343.8	2259.6	497.2	92.7												6.104	6.104	32.043	9.766	22.888	11.597		9.46	17.7	11.902	9.68262	11.1026	7.324	9.155	13.123
1381.3	649	1070.3	850.4	147.6	240		525	809.2	399	144.898	375	939.6	764.7	790.5	108.3	64.25	2206	429.2	735.9	584.6	98	89.1	253.2												8.24	11.597	4.883	5.493	11.597	11.292		12.207	17.09	13.428	9.9496	15.522	7.324	18.616	8.545
754.1	538.6	2885.3	1489.5	246.9	416.4		795.8	401.4	1862.1	213.797	863.299	598.9	52.1	515.7	231.7	129.75	1012	166.8	146.5	36.4	558.9	337.3	146.3												9.155	7.935	8.545	13.428	18.921	10.376		11.292	19.836	12.817	9.54639	9.52569	7.019	10.071	9.155
2944.7	1228.8	374	2777.2	186.4	144.2		662	2582.5	967.3	52.7031	202.4	81.4	13.3	41.6	20.7	488	106.2	317.6	96.3	1104.7	153.4	254.6	150.9												5.798	7.629	7.324	22.583	6.409	11.292		8.85	12.207	19.836	10.2304	14.6199	11.292	40.588	17.7
198.8	263.3	865.5	4328.7	260.5	21		182.9	203.1	566.1	58.2031	184.4	101	150.4	225.4	22.8	44.75	199.2	352.7	125.5	29.2	1123.4	149.4	42.2												5.798	9.766	5.188	6.409	21.057	65.613		12.512	14.343	10.986	23.1621	11.094	9.766	12.207	6.409
132.5	661.5	716	2708.3	181.1	154.6		183.8	156.2	151.8	88.3984	38.5996	422.5	207.2	689.2	17.2	241.5	1040.7	521.5	39.1	959.4	3229.3	304.9	83.2												10.376	6.409	5.493	5.798	10.681	14.038		9.46	13.428	12.207	29.7659	8.44538	11.292	13.123	10.986
542.7	1251	278.7	3343.3	302.2	120.1		87.7	2244	547.7	118.602	278	115.9	117.7	548	65.5	163.25	333	92.8	97.2	31.8	1242.2	53	87.6												9.766	12.817	7.324	5.188	12.512	10.681		13.733	17.09	13.123	18.6573	9.53987	6.714	24.414	6.409
1480.1	1556.5	1373.5	2175.7	358.3	932.5		84.4	1696.9	17.8	87.5	0.300781	107.6	123.4	205.6	335.7	232.5	130.1	315.8	290.3	1740.8	485.5	83.5	81.6												7.019	7.019	7.019	16.479	6.714	31.128		13.123	35.706	15.564	14.1896	9.50407	22.888	10.681	15.564
432.7	115.6	914.8	1381.6	68	535.2		37.6	156.8	8.1	303.594	0.699219	303.2	36	97.1	195.6	67.75	710.8	294.3	1455.3	616.6	731.8	167.8	141.5												6.104	7.629	17.7	5.493	11.902	19.226		14.343	27.771	17.09	17.258	9.72841	6.104	9.46	12.817
8.3	698.6	1614.9	690	66.6	943.1		348.8	941.6	426.6	415.305	1614.3	267.9	27.3	403.8	227	106	2895.8	694	56.4	546.4	960.6	219.7	16.5												10.376	7.629	7.019	16.479	11.292	16.174		12.207	20.142	14.343	13.1244	13.0353	7.324	11.292	11.902
85.5	1123	1606.6	93.4	107.8	157		332.2	1180.1	581.5	253	357.199	239.7	661.1	21.6	115.7	802.75	51.9	47.9	24.7	912.6	634.2	48	65.6												6.104	6.714	16.479	18.005	27.161	17.7		11.292	13.733	11.902	9.53937	10.93	24.719	16.174	7.935
1076.6	942.5	1234.5	373.7	58	295.1		285.6	160.5	1239.5	786.102	644	138.7	83.6	84	372.9	54.75	433	479.4	362.3	771.6	3043.5	2.4	383.1												7.324	10.986	13.733	15.564	16.479	13.428		12.207	11.902	14.038	32.4321	9.04315	16.174	12.207	7.629
2417.3	533.7	2893.9	3256.1	141.5	2677.4		622.2	535.4	50.3	647.594	481.9	810.1	85	151.8	122.7	241.25	26.3	468.8	155.3	70.2	126.7	111.5	222												6.104	18.616	11.292	5.493	14.038	12.817		14.648	13.123	10.986	10.4058	11.8722	9.155	12.207	14.954
3043.8	523.7	330.8	3604	83.9	264.2		208	423.6	1004.9	31.7031	52.5996	44.8	384.4	304.7	203.6	223.5	131.1	489.4	240.9	394.6	389.3	224.1	191.2												7.629	10.071	6.104	5.493	20.142	16.174		11.902	12.512	14.343	8.3653	8.32146	8.24	10.681	8.545
4548.9	53.3	385.8	434.2	164.6	572.1		1008.8	1844.2	580	900.5	91.5996	127	376.1	67.2	111.7	350	861.1	408.3	1701.4	49.3	214.9	136.3	120.4												5.798	23.193	4.883	18.005	25.635	16.479		9.155	19.531	11.597	17.8769	10.1593	29.297	10.681	32.959
2174	752.5	82.6	7924.3	87.3	691		67.3	262.6	109.9	159.5	168.4	36.2	260.3	278.5	117.1	294.5	517.8	54.9	1171.1	302.2	1697	334.8	42.9												18.921	7.324	11.902	6.104	21.362	11.597		12.512	25.024	12.817	26.5239	13.9875	8.24	18.311	7.935
1761.7	16.2	1864.1	2460.1	112.9	415.4		498.2	180	173.4	24.1016	228.801	345	133.4	278.2	313.2	276	99.6	1205.6	280	1304.7	901.7	361.6	63.4												12.207	9.766	6.409	17.09	11.597	19.531		9.46	12.512	13.428	14.769	13.8767	8.545	14.648	11.902
200.2	2798.6	3476.4	2402.1	102.7	1473.2		69	811.7	333.5	290.102	117.6	67.5	42.7	686.5	115.9	48.5	520.4	209.5	423.3	62	1679.7	130	47.3												5.798	14.343	4.883	8.85	19.226	13.428		10.681	14.648	20.142	11.0746	11.8447	12.207	16.479	14.343
17.3	2932.3	36.5	1868.6	202.9	2477.9		84.5	602.3	182.3	469.695	1148.5	765.3	143.1	1473.5	351.8	106.5	149	526.1	625.2	688.4	1683.4	251.7	51.3												6.104	10.986	5.188	5.493	20.142	15.259		10.681	25.33	18.921	14.503	11.481	33.569	16.785	10.986
333.9	1800.3	745.7	254.1	25.6	110.8		600.6	57.8	976.6	166.805	78	52.1	254.3	42.4	175.2	148.75	1292.3	122.1	1053.1	264.3	930.5	93.2	174.9												6.409	7.324	4.883	7.019	8.85	10.681		9.155	14.954	13.428	24.2073	10.7042	7.324	23.499	14.038
1492.3	257.2	1148.3	268.9	216.6	507.4		126.3	28.7	907	215.695	1126.5	810.2	356.1	303	341.7	1288.5	832.8	1058.7	2664.5	53.1	941.8	100.3	132.4												11.292	9.46	5.188	7.019	7.019	18.616		12.207	12.512	15.869	8.47	8.54209	32.654	20.447	7.019
3095.3	159.8	119.4	67.3	40.7	44.4		197.4	693.5	107.6	0.203125	270.5	345.2	793.7	555.8	45.7	32	926.3	528.3	78.2	39.6	1792.9	388.5	154.9												20.142	12.817	10.071	5.798	10.071	11.902		14.038	14.648	14.038	8.47912	10.0541	10.681	25.635	7.629
878.7	532.1	1688.7	7411	287	153.7		388.5	421.7	634.8	42.3984	662.6	45.4	660.7	216.7	169.4	58.5	81.3	337.4	1165.7	1421.9	1451.8	468.9	622.5												5.798	6.409	9.155	6.104	10.681	11.902		9.46	11.597	11.597	16.2674	12.5266	5.798	39.673	13.123
1148.8	2108.5	986.8	1414.2	139	104.3		463.3	994.4	419.4	737.398	741	22	156	1080.2	35.7	46.75	51.4	182.9	327.2	58.8	615.3	78.2	12.6												5.798	7.629	5.188	6.104	24.109	11.597		10.986	17.395	14.954	12.1244	10.1753	36.011	18.921	13.123
926.6	5937.4	948.8	1522	281.3	1269.1		437.6	1458.8	18.6	33.8047	287	24.1	152.3	56.4	106	42.75	538.2	64.8	678.2	29	289.7	139.6	23.5												12.817	9.766	5.493	8.545	22.583	36.621		10.376	14.038	14.343	10.1815	12.8358	6.104	27.466	7.629
1339.6	75.2	710.4	79.1	617.2	65.2		49.4	300.5	772.9	83.2969	25.5	31.5	204.9	227.9	148.2	162.25	18.2	310	1455.1	0.8	574.4	195.8	218.4												6.714	7.324	10.376	7.629	17.09	15.259		9.766	15.259	18.005	17.7144	11.9379	24.719	13.733	7.629
3817.3	1814.9	4001.5	2031.9	150.3	330.8		218.2	2372.2	1067.9	375.203	392	23.5	164.3	184.5	195.4	62.5	1757.4	125.6	327.4	66	1092.9	522.9	272.2												5.798	21.667	5.798	6.104	40.588	10.376		10.986	15.259	14.343	12.5228	11.013	7.935	11.292	11.292
2207.8	258.2	2893.6	127.1	230.8	350.9		157.8	428	936.3	19.5	429.201	144.9	468.1	1257.6	23.1	247.5	2336.6	234	398.4	462.5	60.4	516.4	300.7												6.714	9.155	10.071	8.545	15.564	23.804		9.46	11.597	11.292	11.1079	9.65095	21.667	18.921	7.935
247.8	775.9	540.5	549.9	696.8	406.3		93.4	2409.3	133.6	211.594	209.699	679.7	333.5	1219.7	102.1	30.5	204.8	417.6	205.8	309.9	4939.7	33.3	182												7.629	6.714	7.629	5.493	7.019	12.207		11.597	15.564	12.817	9.7185	8.59207	6.409	20.142	22.278
348.9	796.4	245.9	534.1	98	9.2		967.2	428.9	286.3	230.5	132.199	569.7	200.5	77.1	100	231	352.8	314.5	1464.7	27.8	573.4	177.3	477.6												6.104	8.545	24.109	7.629	34.18	20.447		9.766	16.174	12.207	11.5025	9.36531	6.409	22.888	16.174
2140.8	1860.2	771.4	1962.7	244.5	120.9		367.1	744.2	1830.6	457.703	544.201	678.4	931.7	139.2	61.5	130.5	513.2	212.7	172	570.4	3135.8	161.3	358.4												7.019	6.409	7.629	5.493	6.714	18.921		9.46	12.817	12.207	12.8734	8.14913	6.104	36.926	12.817
480	2980.2	138	52.2	293.5	1013.7		330.4	45.6	1217	401.898	756.1	66.8	903.5	311.7	30.4	241.5	532.3	713.9	57.8	81.7	644	95	500.3												7.324	6.409	6.409	5.493	17.09	14.038		14.954	11.902	13.428	14.672	8.54335	18.311	26.55	12.512
703.5	773.7	3246.1	2961.7	30.6	14.8		1094.4	1180.1	217.1	331.305	206.801	311	219.8	207.8	120.7	178.75	446.9	183.1	508.3	813.6	85.1	438.8	526.8												7.629	10.376	7.629	7.629	7.019	32.654		11.597	25.94	11.597	12.8849	13.3903	10.376	18.616	7.629
402.7	638.3	305.7	1134.7	500.3	551.7		1033.3	101.9	110.6	960.695	89.0996	432.9	503	436.1	196.3	224.75	380.4	1374	274.2	59.2	423.8	408.6	61.8												7.629	7.019	5.188	10.681	8.24	16.479		14.343	11.292	17.7	8.72125	9.36219	24.414	32.959	7.629
14.2	2016.9	226.9	1301.4	105.3	150.2		1903	1702	39.9	52.7031	1036.2	222.1	314	132.3	636.9	89.25	2009.4	191.8	1249.7	625.1	567.3	158.7	306.3												12.817	10.376	7.935	7.629	10.376	23.193		10.376	31.433	18.616	10.9775	11.1762	11.597	42.419	15.564
323.4	96.7	97.8	1953.9	135.2	77.8		503	482.5	1004.6	866.102	274	219.6	799.3	989.2	155.5	58.5	357.6	133.8	120.3	127	1033.6	74.6	97.9												5.798	10.071	6.104	11.597	22.278	27.161		11.292	13.123	14.954	14.8941	10.2928	19.836	15.869	11.597
159.9	1763.2	835.4	1672.7	228.8	512.7		2025.5	57	462.4	92.8984	340.201	224.8	45.1	173.9	13.4	102.25	182.2	163.3	215.7	18.4	250.4	85.7	188.2												12.512	8.545	5.798	6.409	27.466	18.005		17.395	12.512	18.311	20.3489	15.2313	7.629	11.292	10.681
45.2	138.3	1379.6	2133.6	235.1	1114.6		558.3	670.8	2001.5	49.6016	185.299	50.9	164.6	537	11.8	117.25	1187.5	383.7	231.7	612.8	705.8	162.1	191												9.46	7.324	9.46	6.714	9.766	23.193		10.376	13.428	11.292	11.2605	9.35977	7.019	11.902	7.935
22.4	1336.4	738.5	2063.3	357.8	926.2		141.8	1482.5	146	136.797	1050.7	63.4	1086	416.2	20.2	190.25	1559.7	144.6	524.2	289.9	2275.8	115.1	97.3												7.324	6.714	5.493	15.564	17.09	18.921		13.123	12.512	15.564	10.6795	8.00677	25.024	9.155	7.019
295.2	3651.4	438.3	1342.5	48.2	34.7		1912.7	777.6	514.6	946.898	263.199	187.8	14.8	329.4	158.1	752.25	89.4	219.7	541.5	105.7	1411.1	112.6	134.1												7.019	6.104	4.883	6.409	18.005	14.343		11.292	14.343	15.259	15.3292	9.265	23.804	9.46	11.902
620.4	1415	674	1364	376.4	221.1		806.1	282.5	199.4	199.398	828.4	34.4	74.6	692.5	126.6	42.75	222.1	484.5	1193.8	455.5	88.2	357.5	189.5												10.376	6.409	4.883	5.188	30.212	31.128		11.292	17.7	12.817	11.7283	8.9519	12.817	30.212	18.311
326.6	405.4	1349.1	416.5	17	474.6		93.6	202.3	208.4	209.406	1270	905.2	38.2	474.5	296.8	93.25	383	107.6	1331.8	617.1	98.1	213	176.1												5.798	6.104	8.24	9.46	21.362	12.512		11.292	21.667	11.902	8.82871	9.96844	13.733	10.376	9.155
36.9	232.7	35.9	3685.9	49.6	813.1		271	626.8	1027.2	253.094	192.203	219.8	21	292.9	231.7	88	492.9	463.6	2233.5	296.4	605.1	170.7	69.2												7.629	20.447	7.324	10.071	9.155	13.428		10.986	21.667	10.986	22.121	9.98785	12.817	10.376	16.479
179.7	211.9	837.6	1545.7	107.6	122.6		2275.8	333.8	255.8	96.9062	465.398	319.2	225.8	64.3	500.9	36.25	809.5	118	234.9	133.4	309.1	134.5	109.7												9.155	7.935	5.493	16.479	25.024	22.583		11.292	26.245	14.038	12.7135	11.5308	8.545	11.597	6.714
91.4	697.7	65.8	2043.3	69.9	636		67.3	1229	432.5	252.5	928.699	39.5	97.5	110.5	254.9	333.75	159.1	70.4	442.4	435	761.4	279.2	130.8												5.798	7.935	20.447	5.188	8.24	12.817		10.071	20.447	21.362	10.6474	8.88874	7.019	21.362	30.212
58.1	241.7	680.1	122.4	122.1	404.6		154.9	156.2	65.2	146.094	1523.1	75.3	190.5	218.5	363.6	591.25	443.4	51.3	223.3	436.4	4927.5	119.1	21.3												8.545	10.376	5.188	6.104	7.019	15.869		12.512	19.226	11.292	10.5709	8.67837	9.766	12.512	18.921
72.4	1092.4	2284.6	892.7	63.2	645.2		915.6	2123.1	746.8	246.406	213.398	641.3	125	146	117.5	37.5	415.4	34.6	538.7	103	2333.8	413.6	94.4												12.207	20.142	6.104	18.005	8.85	12.207		16.785	17.395	11.292	11.0237	10.8887	7.935	15.869	6.714
67.3	533	1314.2	591.2	197.9	337.3		385.6	1966.9	472.2	463.695	280.199	47.6	694.2	410.4	124	92	643.6	89.2	1758.6	39.9	4161.1	138.3	826.2												7.019	6.714	9.766	5.493	14.954	18.616		13.123	13.123	14.954	13.8396	7.97383	7.019	13.733	10.681
50.6	1421.7	58.9	572.6	24.8	869.7		652.6	499.3	630.2	511.602	174.301	75.2	321.4	670.8	605.3	343	733	19.3	218.6	293	711.5	316.3	118												5.798	6.714	8.24	5.798	16.479	14.954		13.428	13.733	13.428	10.2169	11.8809	10.071	18.616	14.343
109.7	2389.2	2898.2	1115.3	44.4	352.7		231.7	412	494.1	288.898	244.199	381.7	345.6	115.6	87.5	430	587.7	115.7	246	228.3	6068.8	482.3	78.9												8.24	6.714	14.954	16.785	16.785	20.142		18.311	23.499	14.038	21.7164	24.3974	21.057	9.155	7.324
319.6	593.3	631.3	748.5	124.3	373.2		91.1	804.7	971.3	528.203	209.703	1048.9	134.2	810.8	323.9	44	669.3	395.8	60.5	170.6	1928.8	79.6	435.9												6.714	8.85	5.493	5.493	7.019	24.414		10.071	14.343	18.311	8.17384	9.93939	9.155	9.46	9.155
3776.2	1164.8	312.2	437.4	197	10.6		213.9	485.3	190.2	82.6016	178.398	764.6	197.9	129.5	838.1	621	974.7	162.4	238.1	295.6	162	47.1	581.2												12.817	20.142	6.104	15.564	9.766	19.531		9.46	14.648	12.207	24.0641	8.90715	10.071	12.512	26.855
2657.7	1449.5	1957.9	105.4	44	216.3		778.9	1268	145	160.594	396.801	71.5	360.5	487.7	652.8	399.75	438.5	280.1	656.6	448.7	1434.8	86.5	87												6.104	7.629	5.188	5.188	14.954	11.292		11.597	20.142	11.597	12.8406	13.2146	9.766	35.095	10.071
855	77.2	1791.8	3450.7	299.2	204.3		805.9	1426.4	1824.8	372.203	792.801	427.2	349	320.5	108.4	458.5	184	535.5	512.5	218.6	1123.8	109.2	383.7												15.869	9.155	7.324	5.798	6.714	23.804		10.986	18.005	11.292	8.07449	7.91467	7.324	9.766	6.409
653.4	1517.5	2094.5	1670.7	83.1	1666.5		1303.6	578	370.4	200.5	839.297	763	122	300.3	108.8	419.75	1033.7	1053.5	277.2	253.4	150.2	198.7	283.3												5.798	7.629	9.46	6.409	9.155	10.986		10.376	11.597	11.292	8.39047	9.79229	14.954	9.155	9.46
1390.5	1623.6	82.3	75.5	166	1103.6		341.6	527.1	285.3	219.797	1223.4	199.3	525.9	562.7	41.6	1291.75	1300.2	912.1	1136.2	59.7	125.3	209.3	44.2												6.714	7.935	5.188	6.409	18.616	18.921		9.46	12.817	10.986	8.70154	10.8965	7.629	11.902	10.376
380	1010.9	1524.9	1278.9	56	1343.2		96.3	95.3	1933.7	269.406	250.699	48.6	51.2	702.9	240.6	33.75	525.4	730.1	511.5	188.1	307.4	22.7	62.6												8.545	6.714	8.24	10.376	10.376	18.616		9.155	10.986	11.597	13.4263	10.2545	18.005	14.954	7.629
2253.8	1121.1	47.1	1118	93.2	470.4		163.7	4207.6	331.6	330.695	392.602	1385.9	156.6	160.6	58.4	181.25	176.1	285.9	230.3	311.7	270	18.7	82.5												5.798	7.629	7.324	13.733	9.155	20.447		11.597	18.616	14.038	10.5162	10.6263	13.123	31.128	11.292
270.7	510.6	1441.4	2023.2	117.7	1589.1		303.5	2356.6	1371.7	0.703125	626.797	599.8	235.8	23.1	111	84.25	422.3	67.3	658.3	415.4	1970.2	855.6	49												7.019	7.019	6.714	6.714	18.616	25.635		10.071	15.259	11.292	10.4173	13.8124	6.714	23.499	7.019
379	2785.5	1046	158.9	43	2839		655	862.1	453.6	312.102	180.602	131.7	363.8	388.4	96.1	33.5	727.7	982.8	271.2	276	1988.8	578.2	214.1												6.714	7.629	7.019	7.019	7.324	31.433		16.479	17.395	10.986	10.3508	13.7049	7.324	9.155	8.24
548	788.3	804	2452.9	336.9	1374.6		29.1	38.3	879.3	50.5938	1048.6	177.3	52.7	80.6	156	117.5	426.1	314.7	569.2	26.3	551.2	244.3	96.6												5.798	7.019	5.798	15.259	18.311	14.648		12.817	12.817	13.733	9.32231	14.0498	7.019	21.667	10.376
615.8	57.6	688.9	184.9	296.8	291.7		279.3	3150.4	103	142.602	171.199	75.6	75.1	124.6	145.6	54.5	1415.9	110.4	419.4	13.6	1150.9	646.4	395												6.714	7.324	4.883	6.104	10.071	14.038		14.343	21.057	13.428	7.2375	10.4581	8.545	30.518	10.986
49.9	1153.8	718.6	116.2	297.6	394		12.8	120.3	124.4	145.703	54.1992	89.4	27.9	558.4	68.9	254.25	335.1	437.1	630	19.5	281.3	116.3	188.5												17.09	6.409	7.019	9.155	24.719	12.207		11.292	13.123	11.597	16.8458	11.7809	5.798	10.071	9.46
2089.7	226.4	15.5	132.3	142.1	292		339.8	596.1	44.3	24.7969	179.801	98.8	1046.5	156.9	155.7	113.75	12.3	150.8	574.6	272	510.3	348.1	16.5												10.376	7.629	5.493	17.395	31.433	12.207		13.428	15.564	13.428	9.09458	9.7691	22.278	13.733	9.155
2301.2	661.7	2857.9	1122.6	23.7	609.1		653.4	274.5	1057.7	60.8984	339	64.1	375.4	372.3	160.6	553.5	223.7	172	717.6	1031.1	137.7	121.5	360.1												6.104	6.714	11.902	14.648	7.324	16.174		10.071	13.428	12.207	10.4843	9.17061	8.545	10.071	9.155
418.7	1464.9	234.2	1953.8	193.9	105.2		225.1	1756.8	300.5	86	729.898	94	253.5	263.6	184.7	74.5	173.9	578.4	291.2	25	951.1	517.8	135.4												6.104	7.324	7.324	6.104	19.836	16.785		14.038	13.733	14.954	13.1092	7.87101	7.019	15.564	15.259
566.3	805.6	942	1832.3	31.8	279		90.5	485.8	72.7	70.8047	0.199219	208.9	100.4	68.7	93.8	84.5	613.2	132	414.9	315.6	83.7	36	245.1												6.409	6.714	4.883	18.616	10.681	14.343		9.766	16.479	11.292	11.9854	7.84852	32.349	9.46	9.155
356.5	358.8	1528.3	1370.8	41.1	531.2		333.8	2433.9	231.3	214.602	273.703	671.2	391.9	188.1	227.1	398.75	358.3	123.4	359.6	98.7	460.7	511.9	304.8												6.409	9.46	5.188	6.409	11.597	14.343		11.292	15.869	11.292	7.9238	8.32929	7.324	25.635	19.226
1227.2	12	4039.1	1046.1	195	51.9		196.1	984.8	492.8	275	781.098	124.4	36.6	223	11.2	235.75	215.4	214	177.9	178.5	327.6	569.7	72.6												6.104	7.629	6.409	5.493	10.986	16.785		12.207	15.564	16.785	15.8207	10.5204	7.935	14.038	6.714
125.6	381.7	49.2	319.6	503.2	371.2		914	3103.5	961.1	77.6953	447	15.7	48.7	634.7	150.9	194	241.5	88.7	352.1	48.3	358.6	120.9	575.2												5.798	7.324	5.798	7.935	26.855	21.057		9.155	11.597	11.902	13.099	21.4224	6.104	22.583	8.85
176.7	142.5	3717.1	2379.2	207.6	244.7		1185.7	65.7	510.8	100.305	32.8008	193.8	922.9	239.2	265.9	46.25	420.4	156.2	890.6	268.5	56	126.3	141												6.104	9.766	6.409	12.512	7.935	35.4		9.46	16.174	15.259	11.2758	14.9216	32.959	10.986	7.935
11327.5	373.6	2845.3	499.6	665.9	305.3		1911.7	766.4	63.1	266.195	229.199	823.8	430.7	953.2	28.1	83	214.8	198	2637.8	186.4	183.6	67.4	24.5												8.24	7.324	11.902	5.493	40.588	19.226		9.46	15.564	11.902	34.2875	16.4667	10.681	10.071	18.005
753.3	42.2	1317.8	686.6	68.2	1141.7		1079.2	557.1	995.8	59.5	430.402	265.6	192.5	376	196.7	737.5	30.4	294.4	147.5	49.9	89.7	248.5	244.5												5.798	8.85	5.188	13.123	25.33	24.414		9.46	12.207	12.512	10.861	9.51574	5.798	22.583	13.428
662.8	554.5	1550.8	4305.9	138.7	206.6		205	2143.9	223.6	437	957.098	841.8	91.1	209.2	178.9	187.5	1414.6	262.1	121	340.3	36.7	65.8	564.5												11.902	7.935	6.104	7.019	23.193	35.4		12.817	11.902	12.512	8.86782	10.3913	7.935	9.46	7.324
473.5	282.4	216.7	1066.7	91.3	80.7		697.3	1631.8	133.4	218.602	0.699219	521.4	115.9	92.5	123.5	525.5	315.8	57.9	1331.8	569.8	233.3	178.6	230.2												10.681	6.714	4.883	8.85	13.428	17.7		18.921	24.719	21.667	13.4182	10.4903	16.479	11.902	13.428
862.2	675.2	476	1804.9	209.5	65.8		25.1	282.3	960.4	176.203	1224.8	295.2	289.6	1769.7	54	60.25	141	576.6	983.7	269.8	18.8	160.8	434.4												6.104	30.212	6.104	21.667	7.324	22.888		14.038	16.479	10.986	26.5882	7.82625	6.104	18.921	6.409
2726.2	1204.7	692.8	273.4	10.4	797.1		160.6	1560.5	450.8	215.797	221.699	378.7	36.3	354.7	38.6	143.25	75.7	228.5	325.9	395.3	29.1	102.4	47.9												6.409	6.104	7.935	6.104	7.324	11.597		10.376	12.817	22.278	18.9189	11.1171	8.85	27.771	12.512
2384.1	1338.5	242.7	1436.5	116.7	1136.6		37.9	546.1	335.5	371.297	108.102	708.7	145.9	951.9	147.6	286.5	308.5	22.1	701.7	142.5	146.7	304.1	218.6												8.545	7.629	6.104	5.798	18.616	28.076		13.428	25.33	14.954	5.96862	15.1715	6.714	11.597	13.123
2471.2	32.8	996.7	8.9	46	271.7		393.9	1175.4	37.1	622.703	833.602	725	40.1	911.4	204.2	2157.25	422.3	137.6	1344.7	1104.2	108.4	278.6	108.6												6.104	10.376	7.019	6.104	14.038	18.921		14.648	53.406	12.512	15.9959	9.85939	27.771	11.902	8.24
401.9	788.4	163.1	5418.3	519.6	468.7		1036.5	2350.5	32	71.1016	360.797	86.9	120.2	522.9	63.9	47.5	1293.4	528.8	324.5	531.1	8.8	534.2	111.4												7.324	27.771	6.714	8.24	12.817	12.512		13.733	12.817	15.259	23.0282	13.7281	41.809	24.414	22.278
4519.9	1504.7	598.2	5995.5	294.7	835		2583.1	731.9	235.6	44.3984	171.203	26.8	832.8	814.9	64.1	648.25	86.7	81.6	72.7	186.7	91.3	38.3	56.7												7.629	7.324	7.935	10.986	18.005	29.907		10.071	11.902	12.207	9.45225	10.6078	33.875	10.681	9.155
2166.4	334.9	2475.7	255.7	107.5	202.1		1085.8	121.3	28.1	59.1016	249.5	154.5	529.6	209.7	569.1	580.25	1527.5	442.8	78	19	192.4	61.2	90.3												9.46	7.019	5.798	33.569	12.512	13.123		8.85	11.902	10.986	8.60709	19.7722	10.071	10.071	8.24
431.8	610.2	403.8	1448.1	189.5	118.8		611.7	1176	246.9	448.602	904.699	144.8	103.7	675.8	66.5	199.5	696.8	74.1	300.5	690.3	56.6	144.1	52												5.798	6.409	20.752	6.104	18.005	33.264		16.479	11.597	13.733	9.92416	11.4016	10.376	16.479	7.019
330.7	126	1361.2	83.6	52.9	544.9		316.4	5754.8	900.8	93.3984	57.3984	123.1	244.4	620.5	143.4	404.5	2946.2	88.3	301.5	269.8	153.7	318.5	166.5												6.104	32.654	7.935	10.986	14.954	31.128		12.512	18.005	10.986	18.5604	8.3432	9.46	12.207	8.24
8832.2	439.3	1759.6	1413.1	69.8	248.2		466.7	2055.8	13.9	585.398	32.5	75.7	362.5	428.7	51.9	66.75	15.5	937.8	191.5	84.2	130.7	535	266.2												5.798	11.902	8.85	5.493	12.512	12.512		9.46	11.902	12.207	12.4193	15.8569	6.714	10.986	14.954
2106.1	2983.1	1799.5	1316.1	379.3	413.5		1422.1	1782.6	526	611.102	156.301	204.8	619.4	64	135.9	51.25	1950.8	643.2	2996.4	421.2	27.1	103	56.3												10.986	6.714	12.817	7.324	8.545	35.4		14.648	24.109	11.292	22.7922	10.1124	21.362	31.128	7.324
1127.7	410.2	58.2	95.4	52.1	453.5		324.5	3145.7	470.7	456.398	977.5	362.4	1560.7	20.8	154	154.25	973.5	314.5	147.2	890.7	565.3	55.4	595												8.545	6.409	4.883	5.188	12.817	29.297		14.038	27.466	14.343	24.8656	16.932	28.992	20.447	17.09
6687.2	1567.6	652.2	2683.4	226.2	210.9		966	811.1	203.8	959.203	486.898	273.7	12.6	46.3	68.5	259.75	252	226.7	83.6	934.1	18.9	375	152.4												6.104	9.46	4.883	5.798	12.512	14.954		8.85	10.986	23.193	31.8401	8.94538	7.019	20.752	8.24
645.4	25	5253.7	1535.5	119.1	139.2		19.4	1381.2	57.4	386.797	191.102	232.4	124.8	112.6	227.2	307.75	67.9	230.8	191.8	235.5	71.2	319	749.8												7.324	8.24	6.714	14.648	30.212	11.902		10.986	12.512	14.954	17.254	9.65066	8.24	24.414	9.155
1642.9	1041.4	329.6	4915	66.2	381.6		1336.5	87.7	387.6	600.102	1162.5	462	43.7	381.8	272	39.25	820.1	15.7	287.8	272.2	356.4	334.4	49.4												6.714	7.019	6.104	7.935	9.766	33.264		11.902	11.597	13.733	17.4216	10.9064	8.85	20.447	17.395
3765.4	1039.4	138.3	311	30.4	520.8		3633	483.5	418	162.898	244.199	991.6	407.9	57.1	21.8	419.75	669.9	19.9	1312.3	90.5	155.4	241.7	98.8												5.798	6.409	11.292	10.681	11.597	20.752		8.85	16.479	10.986	19.0805	12.2968	14.038	25.635	12.512
2160.4	691	289	1567.1	690	3150.9		76.6	2000.9	50.4	64.2969	264.5	438.1	20.3	371	285.4	381.5	910.3	224.9	295.5	362.6	85.6	55.4	143.5												14.343	6.714	5.188	5.798	28.992	37.842		17.09	18.616	10.986	14.0612	13.514	8.545	13.733	10.376
5344.9	926.1	4154.9	420	109.7	279.4		374.6	103.2	126.6	231.102	189.402	95.3	784.2	207.6	55.2	80.75	116.3	635.4	1138.1	965.1	485.4	485.7	21.3												6.104	6.409	6.714	41.504	21.667	26.55		12.817	13.733	14.038	23.6913	8.55415	6.409	33.875	14.954
5047.2	2382.3	5503.6	1635.4	41.1	2468.2		2450.3	868.4	848.7	1474.31	270.098	456.6	376.4	52.1	469.6	231.5	1246.7	929.1	548.2	413.5	285.1	657.8	187.7												6.104	8.24	11.902	10.071	15.869	17.395		13.123	10.986	12.207	12.0409	9.6976	13.123	21.667	19.226
5732.7	151.3	2790.4	3595.7	437.3	1334.4		2013.3	452	1218.6	220.297	192.301	357.3	1286.3	827.8	55.1	19.75	712.4	114.3	197.3	513.1	165.5	420.2	101.5												6.714	6.409	8.85	5.798	7.935	10.986		9.766	11.292	13.428	8.87888	8.51615	7.629	26.55	7.019
691.1	1300.1	155.9	15.9	130.4	111		1149.8	148.5	147.5	37.8984	163.898	357.7	390	19.1	287.1	145.5	55.7	242	884.3	97.6	229.7	458.4	80.2												10.681	6.409	5.493	5.493	7.629	21.667		10.681	17.395	14.038	17.7262	10.5906	16.785	18.921	7.324
1780.2	568.1	1921	2051	217.1	517.5		334.1	1372.1	2569.2	618.5	694.102	76.3	417.4	265.6	122.6	99.75	507.8	100	1338.4	389	97.2	193.6	157.4												6.104	18.005	4.883	9.46	10.986	15.564		10.071	21.667	10.986	13.6569	13.9927	10.071	11.292	9.155
473.8	554.7	245.3	1012	433.9	1066.2		39	1451.8	41.6	548.203	856	143.2	143.6	247.3	18.4	185.25	278	252.7	1090.6	96.7	230.5	133.8	226.9												11.902	8.545	7.019	7.324	31.738	26.55		10.376	11.902	12.207	7.21241	12.3277	24.719	26.245	9.46
7207.1	258.4	3770.3	238.3	278.4	414.8		253.5	733.8	316.5	425.195	316.703	158.3	1386.7	856.8	302.1	1125.75	109.9	861.5	163.5	821.2	61.2	325.3	210.5												6.409	9.155	5.493	6.714	9.766	18.311		11.597	18.616	23.499	9.02601	11.1335	19.226	14.648	14.038
982.4	749.6	307.8	512.2	343.9	121.1		1053.5	91.6	146.5	176.906	131.195	232.6	326.4	1095	71.8	164.5	105.5	274.3	344.7	1143.8	263.5	75.1	100												8.24	8.545	10.986	6.714	8.24	15.259		9.46	10.986	11.292	9.75775	8.61882	18.311	50.354	21.667
347.4	265.2	861.1	2655.8	456.8	397.8		222.3	67.7	160.5	189.797	99.8046	418.9	199.1	126.2	70.1	54	83	169.8	127.8	890.7	25.1	548.7	210.8												19.531	7.324	4.883	5.188	33.569	39.368		13.123	11.597	14.343	10.0083	16.2721	7.629	11.902	11.292
12893	234.8	5384.8	1898.4	46.6	373.6		233.5	3737.4	1408.6	199.797	548.5	53.1	131.9	535.3	82.4	140	483.3	1034.5	272.3	61.9	161	455.5	156.1												5.798	7.935	7.935	6.104	15.564	17.09		15.259	17.395	10.986	8.33634	10.3011	6.104	10.071	9.766
4103.4	988	361.1	2523.5	104.4	358.1		6570.4	1011.5	259.1	127.203	362.594	65	24	179.8	30.9	82.25	798.7	156.3	2105.2	579.3	383.5	142	77.6												9.46	6.714	5.188	6.714	13.123	43.945		12.817	14.954	13.123	13.2895	8.20118	6.409	20.447	6.409
1640.5	584.5	3304	342.5	595.4	387.9		41	2023.2	1772.9	437.797	0.304443	705	434.3	225.1	309.6	227.25	13.2	542.3	76.2	674.8	197.9	267.2	314.5												12.512	6.714	6.409	11.292	39.063	12.207		10.681	11.902	16.479	9.71693	8.17828	5.798	13.428	9.766
128.6	1373.1	1653.4	62.5	625.8	39.7		535.2	939.5	1134.9	778.805	150.5	88.3	507.2	1179.9	193.6	130.75	630	107	567	1080.3	374.2	186.6	81.6												5.798	6.104	6.104	7.935	14.648	11.597		10.071	14.038	15.564	9.37967	10.6352	7.324	9.46	8.545
5441.8	407.7	824.9	627.5	161.8	966.5		1906	98.9	617.6	161.195	497.602	92.1	356.7	253.7	116.2	664.25	1429.4	582.3	778.6	285.1	105.5	630.5	66.9												15.869	7.935	6.104	5.188	7.935	23.499		9.46	12.512	13.733	23.7808	10.3733	8.24	15.259	6.714
411.6	928.5	2991.7	350.5	295.9	401.2		1040.6	818.1	90.4	72.3047	129	64.3	29.1	118.4	306.7	97.25	1348.3	356.7	389.9	250.1	56.5	284.9	372.6												8.545	7.935	8.24	7.324	22.278	23.804		11.597	13.428	15.869	17.4844	17.6785	12.512	43.945	9.46
6647.5	1221.9	1646	201	470.9	670.4		78.8	526.4	58	107.102	231.797	422.7	199.5	602.3	191.9	170.5	711.2	366.1	180.9	338.7	75.3	114.1	314.5												12.207	8.85	7.629	6.409	21.667	16.785		12.207	11.902	12.207	16.5119	9.37327	10.986	10.071	9.155
1003.3	158.7	1053.9	2075.2	44.3	2686.1		723	68.5	1008.5	589	0.797119	377.9	349.2	113.1	391.3	349.75	225.9	361.7	96.5	104.7	134.9	103	185.8												11.597	6.104	6.409	5.493	15.259	30.212		10.071	12.207	11.597	9.51372	9.49665	16.479	12.817	7.629
	336.1	1067	1330	164.2	480.1		515.3	213.4	2734.1	692.094	1054.6	155.1	139.3	79.8	45.9	107.5	1053.4	265.9	1193.8	328.4	444.3	263.4	283.8													10.376	8.85	5.188	16.479	18.921		9.155	19.531	10.986	21.5234	24.6656	28.687	16.174	11.902
	2043.1	1060.3	5359.7	182.7	1142.1		1048.6	1834.1	133.4	139	142.398	162.5	570.6	245.6	287.9	717.25	1081.6	33.7	271.2	183.5	190.7	646.4	18.4													7.324	10.376	18.616	10.071	10.376		10.071	12.512	14.038	10.0678	16.9671	28.992	10.071	6.409
	1056.1	5213.9	599.3	9.9	226.7		332.1	323.4	1808.8	387.805	214	147.9	251.5	315.9	110.3	206.75	901.7	28.6	1472.4	712	256.3	107.1	15.6													9.46	5.493	6.714	7.629	23.499		10.376	15.564	14.038	15.5179	8.4734	17.7	14.648	16.174
	451.5	1833	1801.6	119.9	691.2		29.8	2295.4	146.8	84.7969	357.805	131.5	75.8	1365	97.7	160	335.2	237	672.9	322.6	92.6	187.9	103.7													6.714	17.09	5.188	21.362	39.368		9.766	11.292	10.986	10.5485	10.4393	8.85	21.057	9.155
	472.3	2100.5	2072.7	26.7	735		461.3	1942.3	125.3	361.898	1345.1	831.8	612.3	37.2	168.8	127.25	181.4	165.3	1789.8	158.4	360.1	33.3	422.4													7.324	5.493	13.123	11.292	45.776		10.071	13.733	12.817	7.76383	13.4722	6.714	25.33	9.766
	1306	1409	636.4	605.9	156		370.4	2004.5	549.6	83.6016	67.7969	99.3	367.7	629.2	176.7	108.25	653	174.6	526.7	945.5	276.4	93.5	220.7													9.155	4.883	6.714	15.869	30.823		15.259	21.667	13.733	10.1832	8.25381	31.433	20.752	11.597
	2028.4	525.3	85	235.8	2051.1		956.9	3783.5	451.3	88.1016	34.2969	510.5	335.2	79.7	134.6	912.5	43	23.2	319.2	137.9	212	66.8	31.4													8.24	5.188	5.493	22.583	47.913		9.766	13.733	11.292	6.59426	16.1159	9.155	9.46	8.85
	371	3318.9	2453	668.7	263.4		1156.2	268.7	844.4	151.602	119.602	282.1	165.6	247.8	16.6	55	186.4	40.2	69.2	586.2	462.1	56.8	154.2													8.85	9.46	5.493	12.207	43.64		9.155	23.193	14.648	10.1551	9.06368	9.46	27.161	7.019
	472.5	46.8	1544.3	183.6	760.3		1183.9	819.9	815.2	181.898	439.602	1172.2	218.8	311.8	9.9	233.5	844.1	342.7	1052.3	33.2	34.4	115.1	124.8													7.324	6.714	5.493	6.409	29.602		14.038	17.7	11.902	11.4909	12.7474	23.193	24.109	7.324
	687.9	2964.6	3311	90.6	253.5		494.6	924.4	102.3	69.7031	141.102	537.4	907.4	182.1	140	113.5	588.9	264.5	273.5	842.1	215.1	317.8	209.8													14.954	5.493	6.104	8.85	12.512		8.85	14.038	16.174	9.56302	11.0975	6.714	16.479	14.648
	1291.1	1470.8	345.4	189.7	25		1479.4	120.5	23.7	405.297	404.898	512.5	19.2	457.6	80.4	469	1737.3	155.5	863.6	484.5	317.9	338.4	272.2													8.545	9.46	8.24	19.836	41.199		11.292	13.123	11.597	15.4584	10.4696	8.24	10.071	9.46
	3666.3	1973	2762.8	873.9	310.3		206.7	2258.4	332.1	1487.6	165	23.3	56	36.1	43.3	134.75	1131.2	339.8	673.8	150.9	364.2	189.8	281.9													10.376	5.493	9.155	14.038	10.986		12.207	13.733	18.616	12.8749	11.5341	7.324	9.46	7.935
	1929.5	611.7	423.1	95.3	155.9		1181.7	563.3	565.7	736.5	156.898	62.2	30.1	115.8	177.1	115.5	9.4	352.1	533.5	68.4	15.5	290.2	60.6													44.861	5.493	6.409	29.907	26.55		11.902	11.597	10.986	12.8399	12.3712	7.629	11.597	12.207
	1702.1	1533.6	237.5	145.4	91.4		345.9	2664.5	688.5	438.898	442.898	16.7	87.2	30.8	35.5	66.75	260.2	647.7	436.2	989.9	1604.4	198.5	521.5													6.714	10.986	18.616	10.071	10.681		9.155	19.531	13.428	11.0721	10.0364	12.207	15.564	16.479
	123.1	220.6	849.7	397.4	1797.9		271.6	396.9	630.5	0.398438	48.2031	532.9	371.3	28.2	73.9	536.75	68.5	94.4	222.1	187	433.2	69.7	305.5													7.324	4.883	11.597	10.681	28.381		8.85	17.395	15.869	11.2869	10.4201	6.409	26.55	10.986
	1270.2	1399.7	1056.7	276.8	1115.5		367.6	1766.8	321.9	167.5	523.203	96.8	311.7	50.8	97	121.75	351.2	196.8	698	115.1	531.7	720.2	117.5													14.648	13.123	5.493	24.109	12.512		9.766	18.311	16.479	10.4969	17.1049	6.409	15.869	14.648
	90.6	577.3	101.9	110.3	418.1		526.1	2490.3	968.4	87.7031	60.5938	2	164.6	256	280.1	223.5	12.3	307.4	82.8	109	534.6	154.1	536.4													7.935	7.019	6.104	7.324	18.616		13.733	14.648	18.005	16.0777	10.7127	10.071	25.33	38.757
	823.7	2449.2	2042.1	458.1	512.8		260.7	3133.1	2615.6	218.898	78.5	98.2	914.9	126.3	33	122	33.4	59.1	446.6	181.7	393.6	326.4	44.1													9.766	4.883	10.376	27.771	39.368		18.311	13.733	11.292	11.6883	8.26395	8.545	22.278	15.259
	4074.6	1039.1	2364.2	55.6	112.5		119.3	230	913.2	323.102	0.304688	427.6	480.9	769.2	121.1	274.5	39.7	245.6	210	319	410.8	390.1	188.6													6.714	7.935	12.512	7.935	15.869		18.005	10.986	13.123	15.1781	8.2888	31.738	17.7	12.512
	2457.8	716.6	3310.5	162.6	707.2		903.1	252	1453.3	345.398	219.797	47.7	490.6	594.8	354.2	668	498.1	93.3	667.6	419.6	358.6	92.4	190.1													6.409	5.188	7.019	24.109	15.564		15.869	22.583	10.986	11.7675	10.6466	23.804	17.09	8.85
	883.1	392.6	1848.9	90.5	29.2		256.1	1024.6	659.3	94.7031	110.703	18.4	344.6	337.6	153.3	169.25	566.2	847.9	265.3	137.4	1117.7	523.8	68.2													22.278	6.104	8.85	11.902	18.311		9.766	11.597	11.902	7.08433	13.134	6.104	17.7	9.155
	2036.2	212.5	5865.3	160	76.3		1708.4	609.2	843.6	0.296875	918.297	146.8	393.8	819.3	146.6	38.5	452.4	78.7	131.8	525.4	77	295.5	97.2													8.545	5.493	14.038	18.005	15.259		12.512	16.479	11.292	7.07233	11.6439	9.155	9.766	12.817
	525.7	164.2		39.3	248.6		1043.1	472	2390.4	377.602	78.2031	396.9	573.5	132.3	89.4	74.25	54.1	231.8	875.6	453.4	598.5	218	176.7													7.019	10.376		39.063	21.057		9.766	14.038	11.902	23.8439	10.8038	8.545	18.311	20.447
	5697.4	1986.8		167.5	108.4		222.2	6505.9	2149.2	137.398	292.898	341.9	559.4	660.4	76.8	192	134.6	354.3	200.7	124.3	430.8	53.6	346.9													8.545	8.24		13.123	25.94		10.376	12.207	12.512	13.8313	14.7444	16.479	41.809	28.076
	364.1	708.6		399.8	718.5		2107.7	310.9	263.2	46.3984	199.297	36.1	148.5	651.9	24.9	211.5	9.6	44.3	333.1	163.8	270	39.7	136.8													9.155	8.24		6.714	10.681		10.376	14.038	15.564	14.1175	17.4212	11.902	23.804	6.409
	982.9	1646.1		105.2	115.7		100.9	1768.1	52.8	288.398	379.703	1035.9	539	195.6	19.5	183.75	53.7	176	61.9	28.6	471.1	363.6	46.5													15.869	7.019		25.94	25.024		14.954	18.921	12.207	8.07371	8.3601	15.564	10.071	26.245
	96.8	3836.4		265.2	368.5		1066.9	251.2	463.3	0.203125	563.398	238.1	473.5	176.1	55.5	773.5	242.3	469.6	10.4	1821.9	345.9	190.1	23.5													7.629	5.493		10.376	27.466		10.376	24.414	13.733	8.04639	10.7221	14.343	10.376	10.071
	216.2	21.5		30.1	372		1001.8	1052.6	425	0.296875	485	359.1	288.5	1069.1	106.6	47.25	285	938.9	624.1	295.2	28.9	73.6	82.6													8.545	5.188		7.019	16.174		16.785	11.292	10.986	8.05121	12.3217	21.057	14.343	25.635
	254.1	2148.2		133.4	597		347.5	1638.7	1107.4	149.203	500.398	179.1	123.3	324.4	145.9	128.25	2076.6	97.6	394.4	519.7	2248.8	156	759.6													42.419	6.104		29.602	21.973		8.85	13.428	14.343	22.7414	7.92459	8.24	9.766	6.409
	819	873.6		149.6	762.9		530.8	514	43.9	233.602	166.5	73.8	342.6	603.2	110.1	762.75	28.7	173.2	1012	91.6	241	52.2	88.5													12.512	6.104		9.46	14.954		9.766	14.343	12.207	10.4877	10.9952	7.935	27.466	15.259
	904.2	721.4		68.5	209.1		254.6	65	1594.8	242.398	780.102	112.9	164.5	276.4	108	344.5	1621	462.8	327.1	598.1	1841.8	556.1	1.2													6.104	11.902		27.161	14.954		9.155	12.512	11.597	12.5735	8.33503	14.648	13.733	7.935
	2063.7	1459.3		145	24.1		396.8	985.2	667.7	781.203	0.304688	93.7	11.3	1300.7	282.2	389.75	2265.3	867.9	1381	17.3	719.5	464.5	195.1													10.071	9.155		46.387	17.7		10.376	18.616	12.817	9.08928	8.40242	31.738	10.986	6.714
	169.4	177.1		67.4	2383.1		1145.7	1899	463.9	126.195	383.094	124.2	184.3	278.5	42	231.75	335.2	202.9	124.4	18.1	221.7	66	191.7													6.409	5.798		19.226	11.597		12.207	12.512	12.817	12.1772	12.7249	16.479	10.376	6.714
	341.3	1741.1		309	53.5		1173.1	1111.6	648.5	191	69.2031	1725.5	244.5	231.1	40.2	329	868.6	429.1	1211	945.5	1546.1	159.5	291.7													17.395	4.883		13.123	18.005		9.766	13.428	19.226	24.8674	13.1634	12.207	10.681	15.869
	626.5	2406.1		304	377.8		149.7	610.2	2302.3	95.3047	505.297	149.5	120.5	107.1	101	393.5	2529.5	55.8	29.7	271.2	1860.3	20.6	70.8													6.714	6.714		22.583	12.512		10.071	14.343	13.123	26.4315	17.6051	22.278	25.635	8.24
	559.8	373		264	124.4		749.1	1431.7	252.7	965.5	322.602	708.5	407.6	304.6	33.6	138.25	406.9	105.1	2140.5	430.6	1703.6	604.4	37.1													6.104	9.46		33.569	21.057		12.817	16.174	13.733	7.83117	14.3736	31.738	14.038	8.24
	1080.9	1960.9		213.2	320.3		702.1	1485.6	432.1	864.5	445.805	1283.5	253.5	193.5	64	215	322.4	36.9	265.8	459	1287.4	73.6	12.8													10.986	7.019		11.292	12.207		12.512	15.259	11.292	13.0348	9.23713	10.681	23.499	7.629
	7678.5	2565.6		520.3	135.9		516.2	1957.6	1326.7	81.7969	183.898	736.2	307.4	316.8	42.6	608.75	1114.9	55.1	49.8	102.4	1131.4	27.9	204.7													9.766	8.85		9.155	24.719		10.986	14.038	28.687	8.84	14.361	7.935	15.869	7.935
	2502.2	1806.7		134.2	569.7		704.2	1436.7	398.8	131.102	596.102	92.2	245	369.9	188.1	363.75	202.5	86.3	103.6	98	96.5	161.1	110.8													7.629	8.24		12.817	12.512		9.46	13.428	12.817	9.13676	10.4808	6.409	11.597	20.447
	262.5	508.6		333.9	31		726.6	375.6	2353.3	0.296875	182.094	454.9	247	102.7	223.2	602.5	97	40.7	591.7	386.6	524	221.6	187.9													7.935	6.409		24.414	35.095		10.986	14.343	11.292	9.13319	8.60922	17.395	12.207	7.935
	436.2	158.6		291.7	54.8		1414.4	374.4	875	461.305	49.1016	628.9	348.5	639.3	22.4	1378.75	45.6	138.3	394.9	210	2419.8	218.7	225.4													6.409	5.188		32.043	10.376		11.292	12.207	12.512	14.5737	13.109	7.935	10.376	11.292
	1065.3	858.7		92.4	454.5		588.4	272.4	461.2	257.898	61	90.7	13	365.3	14.2	148.75	35.4	147.4	175.5	1472	709.7	158.5	196.9													8.24	6.714		6.714	23.193		13.123	11.292	20.142	8.84924	12.5132	20.142	10.681	8.545
	421.1	1287.8		202.4	471.7		418.1	172.4	1079	191.695	706.703	132.9	1110.3	1414.1	18	314.25	580	149.9	70.2	22	103.6	98.5	30.9													14.038	4.883		15.869	11.597		11.902	14.954	12.512	15.0371	12.2378	7.629	40.283	8.85
	1201.9	823.5		293.2	90.7		356.8	645.3	229.9	68.6016	53.3984	120.6	381.7	177.2	175	172	1242.4	224.3	453.5	71.6	323.2	98.1	372.5													21.973	9.46		11.292	11.902		9.766	22.583	11.597	11.5352	8.8679	14.648	17.395	13.428
	1118	1414.7		198.6	273.2		169.4	1068.3	249.5	267	128.703	186.1	34.5	1490.2	172.3	68	466.4	92.7	300	1124.7	1321.7	276.5	721.6													6.409	14.954		22.278	26.245		11.292	10.986	13.733	6.97935	9.68009	8.85	9.46	17.09
	6646.9	6082.9		182.1	222.9		510.2	483.4	719.9	165.703	841.195	436.6	46.6	347.3	31.5	30.5	192.4	252.3	747.6	59.4	809.2	275.5	192.9													8.545	13.428		22.888	34.18		14.343	17.395	22.888	14.8852	10.4526	32.654	10.071	7.324
	1578.9	1512.1		122.5	748.7		1041.2	318.2	77.8	51.2969	0.398438	198.4	606.4	2275.7	351.1	52	318.6	251.1	197.2	42.6	2681.2	1331.2	639.5													7.935	6.714		10.071	11.902		11.597	24.414	12.512	17.6195	10.5036	11.597	20.447	15.259
	3747.9	8340.4		186.3	284.8		25.7	2999.3	15.4	25.8047	238.305	386.2	103.9	254.3	91	151.5	946.6	180.8	201.6	311.3	3035.3	126.4	193.7													9.46	10.376		8.24	10.376		13.428	14.343	10.986	11.8149	8.9856	5.798	9.155	21.057
	885.2	1553.5		349.5	549.7		1047.1	3902.8	743.9	122.797	99.2969	76.4	642.8	68	62.6	190	302.5	25.8	164.6	1280.5	682.2	336.9	133.6													9.766	13.428		19.836	38.147		13.123	13.733	12.817	11.9585	10.6032	7.019	9.46	8.85
	13.8	334.1		74.9	520.7		339.6	2399.6	16.4	239	355.805	127.5	417.6	864.9	22.8	88	134	30.3	786.5	64.7	4528.4	473.4	59.3													7.324	17.395		28.992	24.109		8.85	22.278	17.09	8.24192	12.2083	14.038	9.155	7.935
	225.5	1267.8		222.2	1473.1		280.1	1739.7	1483	183.102	755.297	497.7	50.6	231.8	228.4	436.25	12.8	46.6	314	353.5	987.3	973.5	325.8													7.629	11.902		17.7	12.817		13.123	25.635	11.292	15.2943	9.19968	10.986	15.564	13.733
	761.3	1543.6		20	9.2		120.9	1128.5	1220.5	1022.8	366.703	263.3	128.8	310.1	131.6	196.25	549.3	80.3	1017.2	9.6	1569.8	473.5	110.6													9.155	7.324		6.409	24.109		10.376	20.447	12.817	9.9143	12.2921	9.766	19.226	7.019
	149.4	135.9		598.6	225.3		98.6	1103.5	0.4	94.7031	272.5	60.1	414.4	182	119.2	837.5	291.9	74.8	3023.3	361.9	3341.2	81.4	125.2													14.648	10.681		11.902	18.616		14.648	12.207	12.817	18.6057	11.5162	5.798	10.376	7.019
	1215	4168.3		317.1	2990.7		101.3	1153.8	264.1	219	107.094	64.3	61	628.5	139.2	514.5	54.7	244	283.2	987.9	537.9	80.4	153.2													6.409	5.188		14.343	18.005		12.817	12.207	11.597	15.3907	11.13	11.597	12.207	10.071
	9442.3	1397.1		222.1	563.6		58.5	2751.7	111.8	566.398	608.703	583.4	31.5	140.9	25	1524.75	53.1	150.3	842.1	188	2238.8	464.7	167.2													8.24	5.798		6.714	10.681		12.512	20.447	17.7	8.4754	8.01292	7.629	17.395	7.935
	2304.3	3715.1		34.3	424.7		160	409.7	2285	258.398	615.602	373.1	111.1	1371.4	24.1	497.25	470.7	33.7	380.7	252.4	3047.4	121	54.5													6.409	5.188		7.019	30.518		9.766	25.33	11.902	9.58981	11.4116	7.629	9.46	8.545
	329.1	320.7		306.9	228.1		239.7	448.5	869.3	117.406	448.102	383.4	27.4	62.1	217.7	165.5	936.8	268.2	187.8	45.9	5146.2	320.6	726.6													8.24	5.798		21.973	12.207		8.85	18.921	12.512	11.6485	12.0192	8.545	11.292	8.545
	252.3			203.8	126.6		294.6	47.8	578.2	85.1878	187.594	181.6	1452.2	47.4	84	31.5	321.8	67.8	621.9	737.7	945.9	1079.5	500.3													9.155			25.94	14.343		18.311	11.292	11.597	12.2128	33.3234	9.766	10.071	10.376
	1393.4			215.1	404.9		634.9	203.9	1276	811.093	1102.41	371.7	247.4	425.4	202.5	492	101.4	23.9	93.7	275.3	614	328.7	52.6													6.409			10.681	22.888		9.766	13.123	11.292	9.94313	19.1613	10.376	13.733	13.123
	75.8			32.5	686		1112.8	996.8	603.1	129	316	180.7	212.3	62.2	135.4	853	32.9	329.4	135.8	171	350.2	297.5	24.8													6.104			19.226	17.7		15.259	14.038	24.109	8.594	14.1559	18.005	21.973	7.629
	1026.7			12.5	110		233.2	157.3	807.7	490.625	638.594	263.1	9.2	48.9	47	568.75	75.2	219.5	165.8	228.2	428.7	252.2	15.6													7.019			8.85	21.362		9.766	39.368	11.292	8.14388	9.43298	6.714	10.376	11.597
	951.6			129.1	1128.9		74.3	1562.7	1363.1	424.875	54.6016	161.9	504.5	92.7	113.5	235.25	12.1	121.7	100.6	148.3	123.9	421.7	270.1													15.564			18.005	11.292		9.155	14.038	13.428	9.16057	10.0894	7.019	10.071	10.376
	2332.5			820.6	285		781.9	3091.9	540.7	72.9065	1901.4	140	132	262.1	180.3	1360.75	20.8	115.4	1655.6	59.8	171.8	114.2	526.6													8.24			8.85	19.226		10.681	18.311	10.986	10.1012	13.9367	7.324	23.804	10.071
	1131.7			153.3	446.6		1625.2	1271.8	820.7	103.094	212.805	37.9	194.2	64	47.3	115.25	25.6	82.7	421.4	56.3	288.1	352.2	164.4													10.986			18.005	37.842		11.292	15.259	21.057	8.41215	11.3739	17.7	10.986	8.545
	6327.5			31.2	2302.8		457.1	1536.6	874.1	474.5	889.297	386.1	102.6	45.9	39.7	45	48.8	52	153	24.4	541.2	142.3	37.9													8.545			7.629	12.207		8.85	14.343	23.804	14.394	12.3338	12.512	9.155	6.409
	1098.5			367.5	482.8		516.3	3172.9	2058.3	351.125	100.398	33.3	204.8	1105.3	9.1	270.75	39.7	146.4	326.7	720.9	1358.8	618	67.5													10.681			32.959	14.038		9.46	30.212	20.142	9.2319	11.5441	7.324	28.381	7.324
	1216.1			43.9	2137.6		103.1	866.6	141.3	219.781	353.703	1986.3	475.4	174.3	121.4	104	1055.5	787.8	42.6	328.6	182.9	763.8	20.9													7.324			12.207	12.817		10.376	10.986	17.7	6.71238	10.541	11.292	10.986	17.7
	1112.1			84	1356.5		39.9	1459.7	772.5	0.718506	72.5	80.7	769.3	386.3	274.2	185.5	138.8	164.7	109.5	184	3073.1	18.1	198.3													8.545			11.292	23.193		28.687	18.005	11.292	6.70265	11.7808	27.161	11.597	21.057
	1524.1			84.4	308		456.3	417.5	1066	713.094	383.5	267.4	197.2	268.7	24.9	284.25	698.8	208.2	1281.8	951.3	1871.5	236.2	121.1													6.714			11.597	23.804		10.681	16.174	22.583	6.38103	11.0168	16.785	12.207	8.85
	1994.3			175.2	407.4		118.4	2229.5	495.3	49	423.203	462.3	1805.3	1006.3	25.6	51.75	42.1	432.2	1199.7	789.4	356.1	248.9	362.4													9.46			14.954	21.362		13.733	12.817	15.869	10.4734	9.04177	8.545	16.785	6.409
	1257.1			102.5	272.7		690.6	3052.8	1469.9	807.281	424.297	505.2	1269.5	689.8	137.1	154.5	513.4	571.7	571.5	56.2	532.4	237.7	301.8													12.817			32.043	24.414		11.902	15.869	16.174	8.24562	7.52987	21.057	22.583	15.259
	72.7			269.6	261.5		548.7	5219.7	58.6	76.125	1140.4	246.2	1029.7	767.2	75.3	162.75	218.6	82.7	429.1	631.6	1135.5	17.9	174.7													13.123			9.155	28.687		10.071	31.738	15.564	10.0383	11.0944	5.798	10.071	7.324
	587.5			210.7	388.1		1114.7	373.4	1998.9	813.688	1933.9	122.3	537.4	16.5	29.6	164	127.2	203.7	231.8	199.6	684	214.4	163.1													18.616			7.935	18.311		9.46	20.447	12.817	8.31456	8.68423	27.161	10.681	11.292
	93.8			318.5	34		1570.4	355.6	1280.5	202.906	91.9062	782.2	26.1	344.6	95.9	419.75	633.9	77.4	202.9	163.1	145.3	129.7	148.9													25.94			21.362	11.292		10.681	15.564	13.123	8.62861	9.14704	8.85	17.395	10.986
	1228			375.5	1607.3		124.3	598.9	503.2	98	38.5938	216.1	913.1	93.6	97.6	973.5	38	24.7	553.1	28.5	384.4	230.8	91.3													16.479			21.667	11.292		9.155	10.986	18.311	17.1091	9.20389	12.512	11.902	9.46
	977.5			215.3	251.3		255.5	1141	303.5	223.094	446.602	472.4	305	397.4	115.3	393	207.4	256.2	640.3	782.1	1314.8	383.4	82.6													10.376			23.193	13.123		12.207	13.123	14.648	8.91633	7.86828	13.123	10.376	7.629
	2580.5			418	225.3		978.9	1647.7	303.2	479.594	0.398438	44.3	108.6	827.8	77.2	454.5	326.8	189.5	261.4	99.7	353.4	135.3	448.1													14.038			19.531	31.128		13.428	11.902	13.733	5.96375	7.78027	16.479	21.973	11.292
	295.7			195	2120.4		611.4	204.2	720.5	1022.81	151.5	163.2	1299.2	125.6	54.4	108.25	461.7	167.6	329.9	45	982.8	261	52.4													7.019			21.667	47.913		9.46	12.512	11.902	8.60957	11.6568	6.714	25.635	6.714
	2145.3			702.8	1619.3		422.9	1162.2	986.3	423.5	468.703	403.3	626.4	707.5	238.9	601	330.6	142.6	154.4	159.9	3768.4	182.5	147.7													8.545			14.038	13.733		13.428	16.174	14.343	10.0069	7.61337	9.766	13.428	11.597
	410.7			12.9	207.9		70.6	127.5	2091.2	74.9062	155.898	68.1	35	231.2	108.1	551.75	293.4	250.8	66.3	257.6	587.5	95.9	251.4													8.545			26.855	14.954		9.46	11.902	11.292	11.2991	8.52858	12.817	19.226	12.207
	2470.2			202.9	88.5		263	86.7	2320.9	804.375	45.1016	153.8	32.2	1060.9	23.7	234.5	341.8	31.2	664.2	639.8	2413.5	224.8	83													6.714			7.019	14.038		10.071	12.207	13.428	9.80618	7.25627	22.888	15.564	12.512
	2070.6			109.3	184.6		440.9	91.5	85.9	349.406	143.703	333.7	123.5	695.5	110.5	196.5	168.1	1394.7	88.8	757.8	22.2	553.6	171.4													7.019			19.836	25.024		9.766	10.986	11.292	9.44457	9.44739	16.174	10.376	12.817
	2516.8			34.6	1123.8		1153.8	1748.9	1177.9	565.5	243.398	55.5	57.1	87.6	57.2	540.5	393.9	74.2	2187.7	78.3	2285	517.8	131.9													21.362			29.907	20.447		9.155	16.479	11.292	7.35915	9.26545	8.545	15.564	7.019
	310.8			212	2841.6		835.9	393.6	376.4	1371.59	811.898	32.2	195.6	26.3	136.6	282	236.8	262.7	18.1	108.8	1643.6	16.7	385.5													6.104			10.071	30.823		13.123	13.428	11.597	10.2617	10.218	24.109	12.207	6.409
	508.7			195.5	542.5		250	1657.2	432.5	114.5	0.796875	183.4	15.6	107.6	87	246.75	893.8	34.2	394.9	292.9	2575.2	29.5	74.4													7.019			9.46	28.687		15.869	14.954	16.174	6.75243	9.87143	10.986	9.155	8.24
	274.9			646.3	1358.6		266.3	1792.8	2300.6	127.719	226.703	488.8	627.9	563.6	210.6	119	70.3	258.3	429.6	79.1	711.1	181.6	78.9													6.409			7.324	20.142		12.512	14.038	12.512	11.0941	13.1238	12.817	24.109	8.24
	1266			853.3	1286.9		320.2	1662.3	747.2	33.4062	89.2969	135.4	745.3	687.1	25	442	555.7	281.5	765.5	442.3	1937.1	55.9	69.8													8.545			8.85	14.343		9.155	16.785	14.038	7.97095	11.0553	21.057	9.46	7.629
	251.7			344.2	1299.7		1258.5	235.6	496.7	1280.5	20.1016	2.2	118.2	210.2	93.7	63	214.3	432.4	741	75.6	2133.2	467.9	171.9													6.714			11.902	21.667		14.038	14.038	11.597	19.9106	7.96164	28.992	10.681	7.629
	614.1			162.6	1216.8		221.7	3340.7	1497.3	241.188	300.602	714.9	897	353.5	70.1	288.25	122.9	370.1	2130.6	110.2	3252.6	126.7	344.5													6.104			24.414	20.447		10.986	11.292	11.902	12.8924	10.8595	8.24	10.071	12.207
	1521.1			395.2	498.8		608	465.3	200	181.406	202.703	375.6	448.6	39.8	352.1	376.75	239.5	484	975.1	133.8	3584.4	77.4	23.1													6.104			21.362	37.537		11.597	21.057	12.512	7.80153	7.5742	12.817	41.199	10.681
	261.5			363.9	475		275.1	81.6	99	78.6875	527.297	458.1	801.5	350.1	161.3	954	58.1	317.4	438.4	367.4	2519.8	175.3	56.7													6.104			21.667	11.902		8.85	14.648	14.038	10.4998	17.0566	8.545	22.278	8.545
	4217.4			352.1	990		2258.8	509.8	1499.9	762.906	838.398	82.9	37.4	27.3	150.1	213	660.4	33.7	131.4	186.1	1169.1	309.4	282													11.597			27.161	10.681		11.902	17.09	15.869	9.92237	8.13097	14.954	21.667	7.935
	2165.3			88.5	104.6		275.4	411.2	2152.5	390.188	421.305	179.9	546.9	140.1	92.3	261	824.1	127.8	565.6	65.6	1820.6	52.3	334.6													16.174			33.569	21.973		10.071	16.785	12.207	10.8387	8.20661	28.076	13.733	25.635
	322.7			348.3	1333.5		52	722	189.5	1670.72	71.5	338.7	564.6	304.5	116.1	337	389.6	44.1	2092.1	79.6	1296.1	31.5	225.9													8.545			6.409	23.193		12.512	11.597	13.123	10.1469	11.271	18.311	12.512	15.564
	1870.1			141.6	166.3		157.4	2573.2	1333.9	125.094	599.594	353.8	812	895.8	88.2	835	61.7	36.1	214.5	123.5	2649.6	1322.6	555.7													6.409			32.349	22.278		12.207	14.954	13.123	6.89238	12.6977	9.766	28.076	8.24
	219.1			214.6	185.9		1956.9	1486.3	367.6	403.312	498.406	44.2	81.3	345.7	143.7	646.75	14.5	115.6	93.1	667.3	1562.3	291.7	202.6													7.324			35.095	12.817		10.071	14.954	11.292	9.15186	11.605	12.207	10.986	14.648
	1168.7			214.1	1701.2		318	3593.5	854	0.78125	189	169.8	85.3	98.6	17.9	263	1329.7	125.3	1079.6	287	4377.4	488.5	258.5													35.4			33.569	25.33		27.771	10.986	17.7	9.19588	10.9701	21.667	9.155	11.292
	42.1			263.3	2409.4		265.8	3629.8	3505	195.094	117	114.4	330.8	861.8	93.5	449.25	89.4	17.8	2573.6	414.7	633.2	77.5	38.3													8.545			21.667	14.343		15.564	16.479	16.785	6.96905	9.03241	9.766	28.687	12.817
	298.2			116	351.6		232.9	2826.3	9.2	352.125	616.594	462.8	163.7	38.8	54.7	39.5	162	387.1	438.9	486	3076.9	136.7	17.1													8.24			12.817	16.785		12.817	10.986	11.902	16.9084	10.4956	18.616	13.123	18.616
	1297.3			381.3	1177		391.2	480.6	173.5	340.094	478.203	169.2	123.2	937.6	15.1	78.5	548.3	86.6	154.4	43.3	498.7	251.7	231.2													7.935			30.212	19.531		9.46	14.038	20.752	10.5922	9.99137	6.104	15.564	8.545
	1218.3			312.9	141.7		416.8	118.1	1647.6	496.688	188.703	196.3	167.4	112.7	44.2	1026.75	591.4	320	0	143.8	104.6	428.9	45.5													9.766			8.545	11.597		10.986	11.597	13.123	14.4229	10.5505	13.123	10.986	6.409
	3146.1			223.5	2267.8		891.7	173.3	515.7	42.9062	270.398	37.5	349.6	850.6	130.3	130	214.6	186.3	12.1	62.2	3080.1	420	122.3													9.155			10.376	11.902		10.376	13.428	11.902	12.5788	10.0377	10.071	19.836	7.324
	449.6			629.7	337.6		32.2	211	700.6	470.5	136.398	937.5	506	679.4	164.4	155.75	128.5	72.7	167.6	46	102.6	282.8	346.7													8.545			9.766	42.419		12.512	27.466	14.954	11.7581	9.57768	19.531	10.071	7.324
	469.9			263.7	100.1		556.8	252.6	362.6	623.312	674.703	116.5	1554.2	431.9	77.4	530	645.3	29.6	1187.3	391.5	66.4	295.3	150.9													6.409			17.395	11.292		11.597	14.954	11.597	10.7533	11.3678	10.681	12.512	6.714
	429.3			374.7	255.7		145	96.9	78.9	1107.28	315	662.2	223	597.9	130.3	308	209.8	391.9	1074.9	44.6	39.6	79.1	55.4													12.512			34.18	13.123		9.155	23.499	12.512	8.88008	8.29246	14.038	12.817	7.019
	1941.9			164.5	49.1		884.5	900.4	468.4	0.59375	944	391.8	84.9	99.6	35	101.25	216.1	42.6	528.4	363.4	14.4	737	397.5													6.714			14.038	22.583		11.292	10.986	13.428	8.85704	18.5081	7.324	35.095	7.629
	152.1			232.1	82.4		239.5	1134.3	3998.3	138.5	241.594	836.3	888.1	471.3	69.6	611	134.9	241.5	157	108.5	31.7	94.9	200.3													7.324			9.766	10.376		11.292	11.597	16.479	12.0347	9.47616	7.324	22.583	6.714
	333.8			16.5	2782.9		371	1864	3086.7	592.312	503.406	188.8	25.4	945.6	21.3	156.75	299.2	719.3	163.2	27.7	110.2	382.2	272.1													9.155			14.038	16.174		14.648	12.817	12.512	7.95251	12.0093	7.019	25.33	49.133
	310.4			344	3782		600.3	331.5	435.3	75.0938	362.594	647.2	49.1	51.1	167	663.75	497.5	568.6	189.1	622	85.5	222.4	110.5													6.104			11.292	18.005		9.155	14.648	11.292	8.49955	19.5152	7.935	10.376	10.071
	1046.8			112.3	816.3		696.8	224.3	1283.4	1080	1944.7	404.2	199.1	344.2	24.4	433.5	171.7	99.9	26.7	708.4	41.6	46.9	24.3													6.104			15.869	26.55		10.376	14.648	15.564	9.71358	16.1599	10.986	15.869	9.155
	418.6			500.3	245.8		15.7	190.8	1376	1484.59	179.703	1132.7	62.6	478.9	81.2	951.75	973.1	50.5	1212.9	324.3	306.1	174.3	53.7													7.324			11.597	22.278		9.155	10.986	13.123	17.0426	8.19512	5.798	12.817	6.409
	1797			591.5	198.7		1284.3	79.7	404.7	395.219	176.297	226.9	2023.7	99.1	13.4	92.75	725.6	144.6	2975.2	204.6	171.5	215.7	138.2													10.071			6.409	10.376		10.681	12.512	10.986	13.499	7.41151	11.597	24.109	6.409
	311.1			320	387		587.9	351.9	88.3	940.781	898.203	732.5	499.5	485.6	83	47.75	863.4	54.8	803.4	92.8	94.1	11.8	126.2													9.155			27.771	13.428		12.817	14.343	29.602	12.553	13.7772	5.798	29.907	7.019
	726.2			181.8	678.7		647.2	146.6	204.5	634.219	356.5	198.8	268.2	435.7	39.3	168.5	101.9	132.5	73.5	212.2	1614.3	553.6	42.6													6.409			13.123	19.836		10.681	14.954	12.207	13.6227	19.5892	6.714	27.466	7.324
				137.1	356.9		808.2	438.6	60.3	342.406	143.195	36.2	57.3	173.4	382.6	149	89.4	120.2	2634.1	149.6	512.9	123.3	99.6																28.381	11.292		12.512	11.597	12.207	9.21591	14.1163	7.324	9.766	10.071
				34.7	1264		682.9	412	3025.8	1050.69	152.398	170.8	753.9	151.6	140.1	212.25	198	141.6	284.6	390.7	1026.9	244.6	451.6																31.128	10.986		16.785	10.986	15.259	10.5292	11.5516	33.569	10.376	7.019
				81.1	203.2		390.3	721.5	298.1	192.5	283.5	230.7	23.2	37.2	38.7	144.25	108.4	98.4	66.1	441.1	533.7	430.4	317.2																25.024	19.836		14.648	21.057	16.174	9.33103	10.401	7.019	10.681	9.155
				63.7	1405.7		189.2	5151.5	82.2	938.312	123.805	383.7	742.3	20.3	134.6	175.25	199.8	307.2	294.7	1106.2	2557.8	102.7	228.3																6.714	22.888		11.597	10.986	14.038	11.9883	12.0693	6.104	14.038	9.155
				499.6	177.2		987.4	570.8	764.3	764.875	457.898	73.5	718.7	84.5	34.1	442.75	322.5	157.9	1733.6	74.4	509.5	69.6	544.3																6.714	13.733		14.954	10.986	11.292	11.7388	9.23569	12.207	24.109	10.986
				281.9	330.1		122.6	2109.6	802.1	1110.81	394.297	415.4	1233.6	409.7	89	623.75	458.7	101.1	427.4	92	467.2	34.8	220.9																11.902	10.681		10.681	13.733	11.902	8.3498	10.0343	9.155	19.836	13.428
				464.5	118.2		556.2	1283.5	83.4	455.312	424.5	157.7	112.7	405.6	89.4	41	23.3	88.2	470.5	394.7	1364.7	567	79.2																30.823	22.583		11.597	12.512	19.226	9.07161	14.2299	7.935	15.564	9.155
				227.5	72.8		51.1	2320.1	147.7	172.875	975.805	1872.5	865.8	915.4	13	292	35.6	36.9	352.3	289.4	22.3	154	113.9																9.766	13.428		11.597	12.207	13.123	7.19952	10.7401	9.46	52.49	43.945
				33.1	2186.9		584	86.8	166.3	121.906	282.797	275.9	83.9	134.7	93.2	62.25	508.5	35.4	242.3	451.9	51.3	239.3	60.1																35.706	20.142		10.376	21.362	13.428	8.63282	17.2728	16.174	10.681	6.714
				46.4	163.2		565.4	547.4	644.7	164.906	64.3047	343.1	82.9	405.7	222	293.25	440.5	138.4	323.8	183.1	123.6	221.4	192.1																38.757	18.616		13.733	15.564	12.817	8.57034	9.97417	7.324	11.292	7.019
				226.5	2010.1		1070.5	10	281.7	275.5	327	33.4	42.2	97	7.4	449.75	248.8	73.5	1019.1	88	1329.5	24.3	59.3																15.259	15.564		8.85	15.564	11.292	7.05866	9.4107	7.935	13.123	7.935
				538.7	234.5		181.6	987.4	842.8	55.5	0.59375	118.2	714.1	292.2	41.7	134.25	145.9	56.1	1362.7	535.9	74.3	170.4	83.3																14.343	23.804		10.681	13.733	16.174	8.44564	9.27236	15.869	9.766	7.935
				29	869.6		81.2	312.4	1670	365.188	326	631.1	290.8	92.3	209.8	554	70.8	269.3	188.9	72	912.8	15.8	216.1																10.681	11.597		13.123	21.973	13.428	9.32659	19.1379	14.648	10.071	14.648
				341.1	490		714.5	1299.4	444.7	0.40625	41.2031	803.9	389.8	557.1	31	508.5	294.9	158.2	1889.5	13.6	2492.8	232.5	247.1																27.466	21.362		14.954	13.123	11.597	9.38851	19.0326	8.24	37.537	11.292
				102.2	938.6		660.1	685	227.1	702	1414.1	134.6	216.3	279	85.1	163.5	52.4	607.6	538.4	243.1	449.9	148.3	86.8																6.409	22.278		14.038	11.292	12.817	10.6243	12.8649	8.545	12.207	6.409
				11.2	144.7		534.1	737.1	884.7	861.094	234.695	285.1	405.3	2.4	48.8	210	271	64.5	695.5	132.1	2477.9	241.9	85.9																8.24	10.376		9.155	14.343	11.902	8.07267	9.20762	7.019	17.7	10.986
				346.4	1831.2		677.7		101.3	385.719	155.5	97.5	376.5	119.9	118.1	118.5	977.7	206	665	1343.7	1774.3	174.6	415.7																13.123	19.531		14.343		13.733	9.11894	8.51639	8.24	19.226	7.935
				134.6	603.5		804.2		129.7	317.906	289.305	113.9	285.9	63.5	27.6	221	258.7	33	1098.1	60.7	30	539.9	69.4																17.395	13.733		15.564		12.207	11.7575	14.345	10.681	13.428	6.409
				353.1	755.3		1294.1		218.6	268.094	261	73	686.8	203.7	6.9	57	88.7	240.6	1121.9	961.8	1048.5	230.9	175																19.531	23.499		10.681		11.292	11.5109	12.804	17.09	29.602	7.324
				915.9	542.4		162.9		967.3	640.406	81.2969	108.9	354.1	27.4	160.7	208.5	150.9	50	121.6	309.5	252.7	162.5	29.4																14.038	15.564		10.071		12.207	13.1844	7.89819	10.376	28.381	10.071
				251.1	626.5		536.4		523.6	389.094	0.304688	467.6	514.5	35	230.8	575.25	308.9	35.6	422.4	811.5	359.8	103.5	129.7																22.583	22.888		12.207		12.817	6.48339	7.91006	6.714	9.155	6.409
				80.1	1264.2		600.1		1059.8	73.5938	366.797	480.2	655.9	318.4	54.1	48.25	106.4	384.4	1088.4	13.9	15.9	176	29																9.155	25.024		9.46		12.817	11.7807	9.84423	7.019	9.46	10.376
				293.8	1332.1		808.3		526.7	281.312	1069.8	605.4	442.9	897.1	17.6	223	163.4	600.6	31.1	297.5	45.1	376.1	53.2																19.531	13.733		10.986		12.512	10.5623	12.3371	7.935	9.155	7.629
				35.3	836.6		519.9		392.8	465.594	840.703	468.2	333.9	19.7	32.2	259.5	551.8	251.9	119.3	395.9	153.7	34.1	765.1																14.038	23.499		10.376		11.902	8.25703	18.7354	7.324	11.597	10.986
				13.2	73.8		194.7		380.7	0.28125	842.602	120.9	70.2	59.9	136.3	116.25	748.2	497.7	1246.9	573.7	1024.4	238.7	26																9.46	10.681		19.531		14.343	8.28293	12.1926	10.681	18.005	7.629
				378	142		457.9		333.5	33.9062	433.797	866.7	432.8	1492.5	26.3	9.75	246.4	550.9	610.7	189.2	28.5	1014.2	258.4																15.564	24.414		9.155		11.902	12.4524	13.2715	10.071	9.766	10.681
				303.7	17.5		384.5		435.8	854.219	142	122.4	31.9	806.6	50.4	1091	66	128.1	112	63.1	115.3	92.3	149																11.292	11.597		11.292		12.817	6.73128	18.0834	12.207	18.921	14.038
				302.2	344.6		1884		178.2	736.5	328.594	707.2	396.8	148.3	20.4	721.5	250.4	46.7	347.1	62.2	285.4	193.7	66.3																30.212	40.588		11.597		10.986	7.91504	14.1626	12.207	19.531	12.512
				113.7	1422.3		369.9		164.6	718.781	640.906	1002.6	1367.5	118	25.8	211	37.2	556.8	382.9	47.9	70.1	220.9	42.7																11.292	21.973		9.766		15.564	8.13879	10.6305	9.46	11.597	6.409
				75.4	264.2		201.4		672.5	120.812	215.5	22.6	324.8	1494.8	83	1101.25	158	121.1	435.2	350.1	28.6	678.6	354																10.986	10.986		8.85		10.986	12.1475	8.21724	7.324	80.566	13.123
				503.9	1077.4		994.9		585.8	248.594	677.094	51.3	0.3	10.1	102.7	307.25	801.5	106.7	883.6	260.7	214	418	201.1																8.545	37.537		10.986		13.123	7.1319	8.85358	9.46	79.651	6.409
				134.1	912.7		405.2		135.5	192.688	108.5	210.8	813.3	62.3	68	363	194.8	743.1	2173.6	56	110.1	27	28.6																13.428	11.902		9.155		10.986	11.289	9.35308	7.935	9.46	13.428
				74.8	441.7		294.7		486.6	545.812	248.609	1366	171	264.9	129.5	654.75	40.9	465.4	1040.8	580.7	111.8	181.7	281.5																26.855	12.207		14.648		11.597	7.87026	12.9032	10.681	11.597	7.935
				636.1	795.9		462.8		88.2	182.188	173.203	1171.3	23.9	937.2	82.7	259.5	1786	316.2	1036.5	77.8	286.2	132.6	133.4																20.142	12.207		9.766		12.207	11.4921	9.67458	6.409	11.902	7.019
				275.4	456		608.1		90.2	320.812	0.390869	139	242.8	143.1	50.1	323.75	38.9	127.8	256.8	287.8	85.1	758.2	149																13.428	31.433		10.071		11.597	12.3506	9.6414	6.409	23.193	9.46
				93.3	28.3		690.6		60.3	779.312	112.703	101.7	135.7	177.7	92.2	55.75	530.1	569.2	451.9	0.4	16.4	123.4	48.7																23.499	15.564		11.292		12.817	10.8559	9.8263	24.109	19.836	22.888
				166.4	1287.9		1258.2		28.5	213.594	0.297119	137.1	577	452.9	253.2	288.75	839.8	270.7	61.6	157	314.3	223.2	169.7																9.46	17.395		10.376		11.902	7.26764	9.85568	6.104	13.733	9.155
				897.4	91.3		668.4		262.5	72.2812	143.703	291	2.1	77.9	370.8	94.5	228.6	88.8	1914.1	68.7	160	82.9	312.7																28.992	19.226		10.681		11.902	8.3619	12.5336	38.757	10.681	7.935
				560.7	696.1		672.5		104	683.312	1517.2	1252.4	1035.1	387.9	40	648.75	422.2	187.1	219.5	700.2	74.6	298.6	44																12.817	24.109		11.597		12.817	15.6088	8.59497	6.714	11.902	7.629
				97.8	427.9		340.3		82	200.812	31.7969	370.5	77.9	105.4	14.2	43.5	202.6	387.5	1737.1	143	1344.8	572.4	426.2																13.733	11.597		8.85		14.648	6.85358	17.0691	9.46	9.766	8.545
				15.2	1056.8		419.6		41.8	550	44.0942	68.1	669.2	373.6	47.5	688.75	160.6	491.4	1569.1	776.1	258.1	165.8	40.8																19.226	12.512		9.46		13.428	21.8402	9.91781	10.071	48.218	10.986
				377	1121.2		105.1		163.8	648.5	271.203	134	447.9	108.8	77	1068.5	26.7	197	85.5	38.4	734.6	132.1	89.8																21.362	11.292		10.681		18.921	8.95025	9.58471	11.597	10.376	7.324
				197.6	2025.5		472.2		29.6	1398.5	587	177.8	641.8	132.4	123.7	493	178.7	381.3	203	502.1	1053.8	286.3	34.2																14.343	49.438		11.902		12.817	8.78635	10.5182	5.798	12.207	7.019
				264.7	1035		695.2		96.2	936.5	592.906	897.1	26	445.7	81.6	320.25	1023.9	195.3	784.1	134.5	258.1	49.8	456.4																32.349	45.166		17.395		11.902	12.6915	12.9895	8.545	13.428	24.414
				70.7	575.7		298.5		234.5	366.781	67.5	287.8	817.8	403.4	110.4	143.75	89.6	395.4	42.2	369.6	1191.9	431.6	68.7																8.85	24.414		10.376		11.597	8.12272	9.7921	15.869	9.46	16.479
				164.6	406.9		156.3		620.9	453.312	822.297	636.2	820.7	90.3	118.1	244.5	285.1	702.1	1215	194.5	460.3	189.2	255.6																15.259	14.038		10.376		16.174	10.6781	10.0478	13.428	38.147	6.409
				134.8	902.5		224.6		259.8	2432.5	43.2031	548.6	1196.1	52.3	166.5	717	29.4	236.8	110.9	270.9	1327.9	710.1	87.9																18.005	25.024		15.259		11.292	8.90117	8.7989	12.207	31.433	11.597
				88.2	463.1		308.5		9.1	41	1498.89	1516.3	564.8	149.4	13	34.25	1158.4	450.6	141.2	465.6	1203	184.3	222.6																17.395	13.123		10.986		12.207	8.85471	13.6778	9.766	12.817	6.409
				144.3	419		526.8		395.6	1621.5	221.203	1329.7	147.5	134.2	183.9	28.5	146.5	41.2	29.2	355.7	1724.6	14.6	133.3																22.278	12.817		10.681		20.142	12.2423	12.8322	11.902	9.155	7.324
				265.4	240.2		196.4		93.5	789	144.797	92.9	663.4	259.6	102.1	1002.75	241.2	129.7	195.2	212.7	515.5	583.3	21.3																21.057	11.292		9.766		14.343	7.49264	9.52008	10.071	26.55	8.85
				1394.7	513.3		371.6		303.8	141.594	917.812	1015.2	52.7	306.8	17.7	89.5	125.6	442.4	464.3	275.6	919.2	327.3	114.7																16.174	23.499		13.123		11.292	9.29582	10.3803	11.902	15.869	7.935
				288.6	890.1		50.8		591.9	34.9062	2826.89	1203.1	1182.9	44	150.9	372.75	591.4	67.3	31	81.1	79.2	116.1	91.6																22.888	41.504		9.766		15.564	7.26956	14.482	6.104	25.024	6.409
				181.9	2620.8		140.2		431.7	539.688	378.906	48.6	27.6	45.5	258.3	325.25	112.9	121.7	381.6	179.6	391.1	687	98.4																11.292	14.038		9.766		11.597	12.4845	10.6968	8.85	16.785	7.935
				155	109.8		706.3		433.7	456.094	0.703125	729	279.4	64.4	55.7	1667	1953.9	113.1	805	490	1473.3	337.2	164.7																15.869	15.564		14.648		17.7	13.4974	10.8038	10.071	10.681	12.207
				221.2	447.8		561.3		203.8	544	395.891	472.7	390.1	206.4	224.6	262	1468.2	187.2	3144.6	269.2	62.6	45.7	215.2																12.512	23.499		10.376		12.512	13.7779	11.6696	6.714	10.986	6.714
				164.4	702.6		1700.8		12.1	485.219	1634.7	434.4	219.7	483.8	174	399.75	74.3	247	1330.5	92.6	87.5	235.4	34.7																9.46	14.954		9.155		12.817	12.791	8.98769	9.155	27.466	13.123
				526	681.7		885.4		1381	842.188	798.5	250.5	27.4	369.9	34.9	190.25	591.2	300	162.2	116	2087.6	60.6	249.3																13.428	28.687		11.902		13.428	11.1479	10.3691	8.545	13.733	11.902
				231	650.4		397.3		982	1565.5	105	437.3	203.8	419.3	88.8	304.5	1069.6	56.5	437	1207.6	258.7	156.4	204.2																18.311	42.114		8.85		13.733	10.1343	21.7728	10.071	11.902	17.395
				17.4	936.7		350.6		1054.5	807.906	122.297	424.4	85	515.2	62.7	1423.5	51.3	101.1	106.9	306.7	323.6	278.5	33.5																8.24	16.785		10.986		21.667	7.21118	10.3671	7.935	21.057	9.46
				302.2	254		1129.6		159.4	444.188	475.203	1832.2	629	581.9	96.6	609.5	153.1	147	230.9	774.2	9.5	62	86.8																43.335	25.024		10.986		14.648	6.98341	13.6272	13.428	10.681	8.545
				768.3	104.9		1072		1295.8	170.688	140.094	442.8	248	497.4	130.6	377	29.6	159.4	756.2	318.6	3415	246.7	426.2																18.005	13.428		9.766		14.648	10.3317	8.10069	8.545	19.531	8.545
				351.7	110.4		943.2		3090.9	0.906494	243.406	836.7	689.2	1291.1	53.4	235.25	16.7	451	993.6	251.6		355.7	292.9																51.575	13.428		9.155		11.597	9.88877	16.8293	14.648	12.207	11.597
				39.9	695		247.2		409.4	430	794.703	1581.9	88.4	17.7	24.7	317.5	827.8	661.7	769.4	321.7		1110.8	323.2																26.855	11.292		16.479		16.479	11.5554	15.0533	9.766	27.771	11.597
				34.6	986.7		186.1		672.4	1510.41	45.3906	385.8	160.4	100	40.6	63.75	23.6	21.1	208.9	135.5		145.2	137.6																22.583	27.161		11.597		13.733	8.83703	10.897	25.94	14.343	6.714
				744.4	168		1846		247.7	78.1875	267.703	265.8	354.7	192.5	127.5	164	771.2	584.7	460.9	94.3		86.8	14.8																14.648	10.681		11.902		12.207	8.20525	8.27188	6.409	26.855	7.019
				537.1	225.9		126.9		291.2	302.312	0.40625	1.3	266.4	410.9	305.8	163	151.7	138.6	673.9	25		122.3	89.2																14.648	10.681		12.817		15.564	7.11862	8.28638	7.324	13.733	7.324
				111.4	351.6		711.9		1671.6	1787.09	65.5938	721.7	53	331.7	162.8	86.5	418.7	140.1	27.1	135.4		78.3	43.3																36.621	11.902		9.46		15.259	11.6112	8.40554	11.902	22.278	14.954
				568.6	189.9		69.8		1177.1	148.5	81.7969	147.3	64.9	464.6	176.7	442	470.7	142.3	157.3	1084.1		65.9	260.6																16.479	19.531		10.071		12.207	8.51442	9.78177	6.104	26.855	8.85
				141.8	79.3		945.7		432.5	535.218	499.703	516.8	120	133.4	59.3	49.5	476.1	79.6	299.9	100.5		877.3	414.8																12.817	13.123		9.766		12.207	8.04134	19.0373	12.817	9.766	6.714
				193.3	13.4		996.3		450.4	97.0938	282	1859.7	152.1	142.4	45.7	652.25	336	224.7	139.3	596.1		238.9	77.4																38.452	14.038		10.986		16.785	13.9003	16.9953	6.104	14.954	10.376
				78.3	387.2		663.9		541.4	378.188	121.5	1010.1	107.7	450.2	30.2	217.75	1398.2	506.7	244.1	225.7		216.8	128.5																9.766	13.428		9.155		13.428	14.2213	16.7969	6.104	21.973	14.648
				87.1	313.8		897.1		343.7	358.406	62	125.7	85	409.6	107.8	932	544.7	490.8	576.8	181		439.1	44.9																21.973	10.681		12.817		12.207	8.06302	7.26468	7.019	11.292	7.324
				182.2	13.1		3524.2		629.8	886.906	0.203125	1007.1	260	1897.6	74.9	32.75	426.6	188.7	744.6	201.2		700.6	37.7																25.94	19.531		12.207		12.207	7.66206	7.25137	7.935	23.499	7.935
				588.8	98.9		31.5		34	776.594	160.297	283.9	32.6	206.1	330.2	199.75	48.9	226	819.3	117.7		65.9	25.4																11.902	17.09		9.766		10.986	10.9248	11.4545	7.935	32.959	6.409
				92.7	366.7		868.2		1295.2	136.406	1105.11	317.3	345.6	127.9	188.2	51.5	949.3	275.9	159.9	559.7		544.9	140.6																13.733	43.64		16.174		11.292	12.3617	8.52876	7.629	23.193	7.629
				512.4	890.5		252.1		67.3	335.906	486.594	125	76	314.3	352.4	34	274.4	33	316.2	291.2		349.8	284.8																7.019	31.433		8.85		13.123	8.18245	11.7895	6.409	9.46	12.207
				126	1444.4		134		499	153.094	1008.2	48.2	25.9	1110.7	37	128	98.7	422	1285.9	256.7		31.2	373.5																16.174	11.597		11.597		13.123	9.23868	8.2081	7.935	9.46	6.409
				763.9	596.2		3131		75	232.781	0.296875	619.7	1264.6	55	219.1	409.75	602.8	589.5	430.5	338.8		536.8	30.8																7.019	14.954		12.207		11.597	9.09236	8.17597	11.597	46.082	10.071
				9.1	376.1		570.2		22.1	243.406	1643.09	296.3	302.5	539.2	344.2	464	22.4	104.8	689.6	25.7		589.6	49.2																25.33	25.024		10.986		13.428	8.38017	8.64639	9.766	18.311	6.409
				80.4	426.5		58.4		245.2	851.719	1420.61	361.9	1718.1	94	370.9	17.75	43.7	619.4	178	178.6		1111.3	65.8																9.46	20.447		14.954		10.986	6.62988	8.51107	7.935	61.646	9.155
				313.1	225.8		362.5		1132.4	748.781	712.297	938.5	2.1	0.7	238.3	155.25	235.6	633.6	123.9	166.1		106.5	246																25.024	15.564		10.071		11.902	9.84929	14.0487	6.409	55.847	11.902
				83.4	3145.6		130.1		3551.7	322.719	687	351.5	356.1	22.4	369.4	63.25	344	52.4	345.5	336.2		349.9	216.1																10.071	20.447		10.681		13.428	7.32887	20.5724	19.226	19.836	6.409
				210	1362		1355.4		230.7	157.594	3330.41	51.9	124.5	17.3	292	69.25	184.8	83.7	531.6	650.2		450.5	107.5																7.019	18.921		9.46		11.292	6.53573	19.6564	35.095	11.902	19.836
				307.9	137.9		109.3		35.4	0.40625	25.2969	577	283.6	550.3	100	41.75	4524.2	122.3	1670.5	152.8		415.5	236.8																25.024	11.292		15.564		15.259	6.48527	11.3372	9.766	22.888	10.986
				30.1	3616.2		174.2		722.7	119.094	67.7969	243.7	368.7	176.9	36.5	385.5	754.9	493.8	1154	56.2		119.2	465.1																15.259	61.035		12.817		12.512	8.89903	8.92351	21.057	9.46	6.409
				71.5	463.2		120.7		594.5	260.281	131.797	417	108.7	206.1	245.3	454.75	142.9	144.7	1307.5	35.1		152.7	844.6																20.752	22.888		9.155		19.531	12.6157	10.1036	8.545	26.245	9.766
				125.7	334.4		861.5		28.2	931.906	1772.7	1415.5	161.4	493.7	847	104.25	282	386.9	939.7	106.3		110.3	407.1																12.512	16.785		16.479		16.174	8.06238	7.82507	12.817	27.771	7.324
				622.4	74.2		975.8		645.3	711.094	55.7031	116	36.1	274.2	63.2	281.75	983	440.4	58.7	749.4		0	155.3																28.381	21.667		10.071		13.123	9.41863	7.99618	11.597	23.804	8.545
				69.2	239.7		953.2		2333.4	0.71875	160.891	1518.9	427.7	26.7	142.8	52	93.6	203.7	520.8	55.8		404.5	294.6																14.038	11.597		10.071		14.038	9.30089	29.0003	7.019	62.256	13.733
				164.8	2705.7		227.3		1060.1	472.188	224.609	391.9	320.7	102.9	112.8	327.75	1961.8	53.5	86.5	37.5		388.3	39.5																7.935	11.597		9.766		18.311	10.9284	13.6703	7.324	21.057	16.174
				251.8	546		62.1		601.7	299.5	694.891	224.6	503.7	746.7	89.9	371	302	121.1	447.5	411.4		454.8	56.7																13.123	22.278		9.155		12.817	8.79074	8.56324	36.621	12.207	14.648
				26.5	1664.7		84.7		1010.8	3383.31	155.109	188.7	104	22.2	237.5	65	951.1	82.3	129.1	94.4		61.7	27.6																16.785	29.907		11.597		14.038	11.8271	9.30336	8.24	20.447	6.714
				49.7	690.5		360.1		2168.9	906.5	366	286.4	288.7	812.4	133	421.5	45.8	96.9	3655.5	837.8		64	32.5																16.174	14.954		10.071		19.226	13.8458	14.232	11.902	28.381	12.512
				199.8	593.9		1171.9		122.8	100.906	872	88.7	73.3	247.5	135.4	141.25	164.2	34	55.2	438.2		188.4	229.4																21.973	16.174		9.46		11.292	7.9791	7.7897	21.057	10.376	9.155
				537.6	1341.5		276.2		131.3	848.375	541.391	22.8	896.6	272.8	405.1	95.25	1066.3	113.9	1133.2	219.9		50.2	293.3																24.414	26.55		12.207		11.597	11.8863	8.58052	14.954	60.12	7.324
				207.8	451.2		755.9		1330.7	78.4062	912.609	782.5	239.6	176.8	782.8	128.75	307.2	668.8	633.8	62.9		159.1	35.1																18.921	11.597		9.766		13.428	8.51343	11.0122	7.935	26.245	9.155
				57	194.6		110.1		722	0.8125	1769.5	112.8	37.3	750.1	1565.7	572.25	270.2	475.5	776.9	47.1		540	242.1																22.583	10.986		11.902		11.902	8.06308	10.4834	18.005	11.597	11.902
				383.9	80.2		579.6		4402.1	1839	91.7969	93.5	534.9	2347	194	142.75	76.2	567.4	1032.5	635.1		325.1	184.9																16.479	19.531		11.902		13.733	9.0893	8.28587	8.24	26.55	35.4
				327	2023.3		337.9		574.9	897.688	223	349.4	949.8	248.3	51.2	661.75	572.9	442.5	382.9	252.9		272.4	73.2																7.324	15.869		13.428		12.512	17.1937	10.0311	13.733	9.155	6.409
				139.2	1937.5		850.3		118.6	255.5	113.5	273.6	235.3	612.9	267.6	315.25	200.4	115.5	1263.1	712.2		97.3	111.3																17.09	13.123		19.836		17.7	11.8674	12.4139	8.85	17.7	25.024
				490.6	508.3		293.5		9.1	122.5	1385.7	310.2	77.8	29.4	243.8	44.5	334.9	50.8	800.9	82.4		265.3	149																6.409	20.752		11.597		14.343	11.3665	12.6817	9.155	32.349	11.902
				153.1	557.2		1254.5		772	339.406	108.703	8.4	218	206.1	255.9	596.25	1715.2	64.7	503.1	198		13.5	198.1																22.888	13.733		10.071		19.226	6.87469	13.5635	11.902	17.7	12.207
				29.6	418.3		550.3		477.8	444.406	474.297	483.5	378.9	82.7	184.6	105.25	175.9	429.5	338.1	815.4		379.3	116.3																21.057	10.681		12.512		14.343	6.36731	9.66881	10.376	9.155	10.376
				96.8	944.5		455.7		615.5	45.4062	1524.09	414.7	108.1	283.3	498.1	40	53.6	320.2	358.9	22.5		537.7	461.7																18.616	14.038		10.376		14.343	10.1408	20.9963	9.155	19.836	6.714
				487.9	1281.4		932.5		1558.2	0.78125	24.9062	342.4	345.1	67.7	55.2	527.75	99.6	189.3	853.5	600.6		18.2	74.5																31.128	12.512		8.85		10.986	9.91389	8.52517	7.324	12.512	6.714
				29.3	1623.3		1480.8		2058.5	639.906	2109.8	245.1	51.9	239.2	68.3	599	236.6	542	4757.2	390.3		320.3	91.7																23.804	14.648		12.512		11.902	8.43324	13.5613	13.428	18.616	7.324
				82.5	482		261.7		70.8	1546.91	511.297	812.4	56.6	362.4	253.6	462.75	99.5	206.7	173	50.8		17.4	21.1																19.531	10.681		9.46		12.512	10.0809	12.0403	7.324	11.902	8.545
				78.8	4793.4		536.2		393.1	101.5	1631.91	340.2	692.6	341.6	30.9	45.5	175.1	260.1	1523.4	274		679.9	380.4																16.785	11.292		9.46		14.648	7.27578	8.59304	8.545	31.128	9.155
				128.3	1524.6		176.4		435.8	0.28125	144.203	184.1	975.7	172.8	170	84.75	42.4	98.3	2401.7	66.2		338.4	72.4																21.362	12.512		10.376		14.038	7.42115	16.2441	20.752	58.594	10.376
				271.6	87.7		355.6		1420.1	55.2188	927.391	465	662	427.3	54.7	456	14	1.3	3135.6	1124.7		57.9	166.6																17.09	10.376		10.986		15.259	8.55105	11.7893	12.207	12.817	14.038
				644.5	68.3		1179.8		861	240.281	0.90625	126.8	143.5	157.8	245.9	439	107.6	400.4	146.8	160.6		88.8	271.3																15.869	10.681		14.038		20.752	9.05667	12.1612	17.09	10.986	8.85
				375.8	2555.9		1071.4		1.1	468.812	382.5	561.1	40.3	553.8	772.5	455.75	273.4	26.1	966.1	839.2		53.1	222.2																40.894	31.128		10.681		25.024	7.37158	14.0448	7.324	10.071	7.629
				225.7	902.3		10.6		4546.2	552.5	523.391	1235.9	82	337.8	77.2	171.25	141.4	343.7	780.3	39		713.4	119.4																7.935	58.289		10.376		11.597	8.5667	8.38949	7.935	11.292	21.362
				38.5	1184.2		516.8		963.4	621.594	0.609375	282.2	112.8	566.3	22.9	104.75	947.9	118	53.4	157.2		334.6	103.7																32.349	19.836		10.071		11.902	9.42374	8.26999	6.714	22.583	7.019
				309.1	551		1668.1		1771.7	592.5	51.2031	121.6	149.7	713.8	83.8	935.75	1535.2	37.1	198	74.3		51.2	42.7																17.09	37.842		18.311		15.869	11.303	11.9536	8.85	25.33	8.85
				162.6	362.6		309.7		337.9	720.594	393.188	35.5	64.3	352.2	808.3	870	57.2	251.7	377.6	586.1		138.8	71.9																13.733	13.428		9.766		11.597	8.92091	9.27301	8.24	17.7	14.954
				546.8	16.6		75.7		1670.9	129.219	557.203	484.1	63.6	840.6	247.2	119.5	147.4	14.3	224.4	373.3		135.1	231.4																10.376	18.005		11.597		17.395	8.99587	7.73835	7.629	25.024	6.714
				296.7	2210.3		303.2		1700.2	146.906	0.296875	656.9	420.1	189.7	134	1618.75	16.8	372.1	258.9	389		24.4	284.7																10.071	22.278		8.85		25.33	11.9185	7.71293	26.245	15.564	11.902
				329.7	407.2		1066.9		621.3	510.594	1271.61	376.7	141.5	125.2	391.3	222.5	363.9	444.2	447.6	92.9		85.7	105.7																23.193	15.564		11.902		12.512	7.34279	9.68358	5.798	10.071	16.174
				65.3	1818.3		161.6		2101.5	656.281	336.5	622	1649	370.3	255.8	216.5	368.5	168.6	1849.7	243.9		315.4	52.4																19.226	16.785		10.071		11.902	9.2842	13.9284	6.714	14.954	6.409
				97.9	119.3		671.9		3594.8	65.125	176.391	716.8	376.1	366.3	450.7	219	299.1	76.8	1149.1	29.5		253	130.6																18.921	14.648		10.681		10.986	6.32113	11.8234	6.409	24.414	9.46
				165.7	2547.9		2812.2		1278.8	80.0938	214.406	355.5	331.1	1034.7	526.8	3	153.5	154.7	2838.3	116.9		135.8	15.6																10.986	13.733		9.155		12.512	11.7824	10.9691	6.714	14.648	11.292
				957.9	130.6		381.2		112	170.688	277.406	42.1	116	466.5	18.2	64	34.1	34.5	990.9	90.4		18.9	122.1																9.766	11.597		11.902		10.986	13.2701	8.59241	20.142	41.504	9.46
				584.8	661.6		245.5		86.5	665.906	0.390625	656.2	664.8	952.6	305.5	566.25	66.3	209.8	91.5	524.3		367.3	107.1																10.681	25.33		24.719		16.174	8.09799	8.55761	12.207	26.245	21.362
				31.8	344.5		741.3		64.8	681.812	130.906	195.8	234.3	55.2	39.4	61.25	93.4	33.1	667.3	339.6		181.4	345.8																15.869	19.531		9.46		14.954	7.31334	9.75049	13.428	18.921	8.545
				22.3	1335.7		546.6		1845	194.594	0.390625	375.2	131.1	166.8	114.3	61	145.4	36.8	814.5	269.9		202.9	19.4																21.362	20.447		10.376		25.635	7.90042	9.79551	7.019	10.681	6.714
				306.9	326		133.3		595.5	60.5938	907.812	439.3	36.5	510.6	82.2	126	7.9	243.8	454.6	141		256.9	114.6																6.409	14.954		17.09		11.902	9.23894	8.99795	18.005	9.766	12.817
				100.3	44.1		142.7		339.9	131.594	2205.59	291.2	46.4	86.6	400.3	578.75	1450	162.1	59.8	296.8		77.5	133.8																15.259	16.479		13.428		12.817	7.1827	15.789	10.071	11.902	6.409
				67.2	165.7		600.2		111.4	1147.72	534.594	373.2	60.6	167.3	163.1	376	92.3	508.4	905.6	165.4		41.6	20.2																7.629	18.005		9.766		15.564	11.6654	12.0389	15.259	51.27	6.409
				367	343.8		781.3		1143	431	1076.72	108.8	282.2	1010.2	266.3	659.25	486	306.1	351.5	272.6		407.9	79.3																20.447	20.142		11.902		15.564	6.74642	12.8418	9.46	66.223	7.324
				546	318.6		748.8		916.6	486.281	693.875	305.5	85.4	290.8	88.3	42	47	191.6	949.2	540.9		193.7	477.4																17.09	15.259		10.986		13.733	8.28384	8.31072	6.714	50.964	6.714
				75.6	862.8		922.6		460.4	895.906	1073.5	714.6	28.1	186.5	146.5	61.5	268.3	195.9	484.6	261.9		306.8	181.3																7.019	13.733		12.512		11.597	11.4741	9.07929	6.409	18.921	13.123
				69.3	147.6		342.1		254.8	90.3125	236.812	75.3	1703.6	198.1	657.4	135.75	1019.2	93.5	531	919.3		30.7	224.2																14.648	18.921		13.733		18.616	6.82442	8.65124	5.798	39.063	7.019
				144.8	245.6		1634.3		552.7	1791.28	270	247	660.1	1020.1	197.5	429.25	213.3	725.5	245.7	206		25.3	13.5																14.648	12.512		10.376		12.817	14.1451	8.86083	10.681	21.362	20.447
				89.9	1709.6		595.2		206.1	2242.72	82	65.6	1290	375	1436.1	52	637.5	90.1	1158.6	353.6		554.1	117.2																21.057	12.207		10.071		14.343	9.26919	9.46028	10.681	55.847	13.733
				279.2	712.7		578.1		663.9	201.781	187.375	280.2	38.3	214.8	800.1	77.25	418.6	97.5	568.8	347.9		131	97.7																27.161	15.564		11.902		14.343	9.77454	10.2982	7.629	16.174	10.986
				128.7	41.8		51.6		1138.3	497.5	773.625	72.7	60.9	224.8	90.4	267.75	184.1	48.2	81.4	66.5		274.1	245.6																16.785	11.597		9.155		10.986	7.77871	8.94599	7.324	12.512	8.545
				114.5	262.1		1509		725.5	365.406	1052.38	315.5	241.8	451.7	221	72.5	35.5	175.6	321.8	338.2		35.5	31.4																12.207	16.785		10.071		15.869	8.81402	14.5993	7.935	9.46	7.629
				223.5	597.2		299.5		870.5	1598.41	516.719	431.4	54.3	699.6	128.1	1021.75	88.8	117.1	74.1	205.4		215.7	42.6																26.55	13.428		11.597		13.123	9.00747	12.1685	6.104	38.452	13.733
				224.3	517		126.6		276.8	1609.5	128.781	119.2	59.7	214.6	305.9	476.75	24	79.6	29.9	398.6		77.3	464.8																7.324	15.259		14.343		18.005	10.4347	15.2234	16.174	13.733	6.409
				149.1	546.3		129.8		411.4	705.094	1771.31	966.3	7.9	237.5	592.3	81.5	85.5	221.6	61.4	415.1		494.9	69.8																14.343	26.55		9.46		12.512	6.68319	11.7262	7.324	14.038	7.324
				20.4	390.6		487.7		200.6	0.40625	58.9062	268.3	124.4	103.9	161.5	281.25	39.8	24.9	212.5	108.6		119.3	369.6																27.161	15.259		9.766		14.954	6.67456	21.4931	15.869	10.376	8.24
				440.6	44.3		259.8		49.7	1912.41	136.094	68.5	178.4	35.6	455	390	63.9	49.4	904	583.1		407.9	65.2																12.817	15.259		8.85		12.512	10.143	14.2363	7.019	34.485	15.259
				159.2	123.4		224		856.3	1079.88	304.812	398.9	523.7	546.6	1301.7	38	187.4	892.1	510	37		330.6	154.3																49.744	11.292		15.259		15.564	10.531	19.7597	14.343	20.142	15.869
				91.2	2139.3		35.6		399.7	1368.31	472.594	132.1	403.7	1553.5	49.4	92.5	1297.9	544.1	677.7	82.4		425	31.8																19.531	15.259		13.428		12.207	8.21346	8.07835	13.123	20.752	7.019
				255.3	184.5		1099.7		474	1183.59	0.90625	1647.9	37	260	21.6	169.75	22.4	789.1	234.7	297.1		364.8	160.8																21.667	19.531		12.512		12.512	7.67743	7.76352	8.24	16.785	7.019
				38.7	152.1		126.8		460.7	367.312	181.282	1292.4	641.5	78.6	136.9	12.75	345.1	110.8	308	89.9		61	232.3																9.155	13.733		15.259		10.986	10.1748	7.94294	12.207	38.757	16.785
				281.5	217.4		390.8		770.1	119.281	511.093	833.8	902.1	30.2	316.6	403.5	72.3	41.4	1579.5	363.7		30.2	497.9																19.531	18.616		11.292		14.343	8.26663	11.8334	9.766	13.733	7.019
				446.2	566.5		1560.1		1475.9	261.906	333.719	289.6	307.2	232.7	33.2	140.25	70.8	43.2	837	197.9		256.5	364.2																25.94	27.466		11.902		11.292	8.8878	18.5484	5.798	22.888	6.714
				104.7	1080		161.4		208.4	305.594	1169.19	122.1	496	232.6	149.6	77.75	51.6	224.5	1183	13.3		300.3	207.4																15.869	16.174		10.071		12.817	7.56341	16.7424	6.104	10.071	7.935
				115.8	97.1		241		432.6	997.219	138.593	186.4	354.2	350.5	164.8	65.75	316.1	232.2	2493.7	418.4		317.2	15.8																7.324	11.597		9.155		11.597	7.09329	8.0427	6.104	12.207	8.85
				186.8	324.1		1520.7		2580.7	0.40625	391.406	54.1	37.1	22.5	127.7	180	1080.7	1008.1	966.2	393.5		21.7	454																15.869	26.55		9.46		10.986	7.1954	8.71788	10.071	12.512	6.714
				1807.1	1015.5		626.7		1537.2	688.688	181.094	48.3	23.4	117.7	504.6	286.5	68.8	355.7	404.5	479		143.8	19.9																10.681	21.973		16.479		11.292	8.68925	21.4474	8.24	12.512	11.292
				38.5	421.1		532.5		926.8	1095.59	118.719	645.5	118.3	292.6	19.7	106	35	125.8	1353.7	1248		1005.8	594.2																10.071	10.986		15.259		12.512	22.8788	9.63781	10.376	23.193	11.902
				253.6	209.3		656.9		1569.6	184.312	344.594	54.6	599.2	621.7	110.6	524	209.5	374.2	3447.2	956.3		231.3	459																31.738	10.986		16.174		10.986	9.45781	10.6227	7.324	43.64	7.019
				587.9	720.9		274.4		428.5	256.906	1105.69	378.4	177.6	355.8	409.4	252	554.6	619.8	694.9	96.3		258	170.3																18.311	13.733		14.038		16.479	8.53736	13.0405	16.785	10.986	7.019
				348.5	934.7		140.5		1553.5	699.188	143.219	52.9	14.5	476.3	177	130.25		31.1	637.7	673		123.4	66.8																33.569	36.926		13.733		14.648	10.4479	10.3711	14.648	10.071	9.46
				42.7	1173.7		191.8		221	156.906	673.406	537	59.9	397.6	36.1	34.25		175.6	173.6	939.5		72.3	320.3																10.071	16.174		10.681		13.733	13.1713	10.7058	13.428	19.836	13.428
				167.6	1527.3		202.1		283.9	155	733	160	148.2	139.8	737.6	278.5		177.7	881.9	81.2		136.1	333.3																16.479	24.414		13.428		13.123	6.36758	11.2933	7.629	21.973	9.766
				56.9	803.9		1096.1		2175.2	1301.19	89	735.1	515.2	539.8	17	57		597.3	900.6	14.7		143.3	499.3																7.019	12.512		10.376		10.986	10.0505	12.6433	6.104	13.733	10.986
				249	1002.7		193.8		282.2	937.219	905.688	175.3	106	32.5	84.2	65.75		96.8	636.4	549.8		305.5	516.5																9.46	18.921		15.564		14.343	8.27485	9.0224	9.766	9.155	7.935
				648	367.1		212.6		895.9	688.781	594.188	891.7	128	928.6	831.6	50.25		386.2	979.7	307		346.7	72.3																22.888	19.226		12.817		11.902	15.9264	9.13978	36.011	10.071	7.629
				304.4	134.5		106.7		607.1	1665.81	1011.22	301.7	15.3	759.8	172.3	29		29	1630.3	1248.5		70.4	816.9																14.954	10.376		12.207		12.817	8.1067	13.4647	11.597	13.428	12.512
				381.3	852.9		284.6		274.9	148	160.281	186.1	206.7	419.7	56.7	454		88	290.9	631		140.3	590.5																17.7	11.292		9.155		13.123	9.82074	15.8717	16.479	81.177	9.46
				809.3	323.1		287		1066.5	156.188	169.406	604.5	0.5	242.3	996.9	820.25		115.9	875.7	260.2		710.3	424.1																12.207	14.343		13.733		11.292	15.7199	9.37507	18.311	86.67	18.921
				63.5	469.9		385.5		93.4	479.688	137.594	37.4	145.6	112.2	163.5	201.25		127.6	460.4	78.6		18.2	1432.1																24.109	17.395		12.817		14.648	14.5323	10.4892	6.714	13.428	7.019
				73.3	839.5		248.5		532.9	91.5	48.625	173.1	244.3	75.8	63.9	423.75		186	2796.5	609.9		20.1	291.4																22.278	19.226		13.733		10.986	12.209	7.90512	7.935	14.648	8.24
				150.6	1341.6		1257.2			1891.91	811.5	164	281.9	822.2	35.5	214.75		1058.1	263.8	37.3		393.9	115																16.785	19.836		14.343			7.05837	10.61	16.479	12.817	6.714
				95.1	486.5		1467.9			759.093	521	891.3	324.6	1056.1	317.7	36.75		33	193.9	461.5		141.3	444																32.654	30.823		12.207			9.22553	10.2788	6.409	14.038	7.324
				333.3	197.4		79.7			743.5	232.781	27	262.2	238.1	1119	39.25		69.3	27	540.1		79.7	32.5																23.804	19.836		11.597			12.102	8.16645	8.545	10.681	7.324
				966.8	238.8		739.7			298.625	311.094	314.3	336.3	224	55.7	312.5		488.5	114.2	24.1		150.6	90																13.428	17.7		8.85			13.6025	12.8351	18.005	20.752	12.207
				33.3	487.5		113			1142.5	288.406	153.8	506.2	264.5	171.4	271		705.9	161.6	1529.1		355.2	263.1																6.714	17.7		9.766			7.26844	10.9433	7.935	32.959	11.292
				158.1	105.5		137.3			1421.19	107.312	384.1	116.5	87.9	312.8	199		133.1	3075.7	28.3		229	155.2																80.261	10.986		10.681			13.1402	19.2361	10.986	32.349	14.343
				26.2	396.5		754.6			189.406	941.5	379.4	325.2	176.1	1694.2	473.25		41.4	121.6	526		25.1	260.3																20.752	26.855		11.597			18.5308	12.9455	11.902	10.986	7.019
				76.2	1898.3		116.7			391.594	96.5938	254.3	240.3	192.8	328.1	233.25		363.9	963.3	213.3		54.7	396.5																10.071	14.648		13.428			14.4324	8.9647	11.292	11.292	13.428
				332.6	3030.6		709.1			197.906	725.594	91	113.6	635.7	417.5	47.75		187.2	317.1	716.4		154	213.1																20.447	12.817		9.46			7.50485	11.1298	15.869	17.7	7.019
				86.6	109.5		146.9			914.188	88.3125	466.1	693.3	134.9	712.2	328.75		291.7	11.7	62.2		52.3	274.7																7.935	12.207		9.46			8.05588	11.2024	6.104	13.123	14.038
				27.6	1127.2		241.3			202.219	175.094	32.3	840.3	643.9	669.9	420.5		28.7	5748.3	625.4		167.7	139.8																7.629	22.583		15.259			11.3331	10.3868	13.123	11.597	7.324
				38.6	330.8		808			126.375	90.5	171.8	328.2	129.1	724.8	11.5		448.5	735.7	286.3		677.3	122.2																6.409	22.888		10.681			7.59662	9.48437	11.292	20.447	9.766
				134.3	663.2		620.1			233.219	136.188	56.5	361.4	611.7	100.3	229.25		201.1	1453.5	97.1		531.7	52.7																8.24	11.902		9.766			15.9709	10.3422	6.409	10.376	10.071
				150.4	276.9		131.4			96.2812	1062.41	451.2	1104.6	436.4	157.7	110		68.8		1079.3		303.9	390.6																6.409	10.376		12.207			9.70145	13.3726	8.85	9.46	19.531
				87.4	518.9		399.1			67.625	1049.91	756	364	988.5	554.8	200.75		326.5		30.2		30.7	17.9																15.259	13.123		15.564			9.22462	8.23365	23.499	15.259	7.019
				61.9	769.6		132.4			751.594	2649.41	572.1	131.3	100.9	149.4	223.5		103.1		554.5		514.9	161.1																13.428	29.602		12.207			9.80008	16.27	9.766	20.447	10.376
				264.3	989.5		353.4			852.906	89.2812	73.1	378.3	91.3	261.6	77.5		226.8		1102.3		102.6	76.7																22.583	19.531		10.071			13.3384	9.62187	9.766	10.681	12.512
				448.9	135.3		998.8			285.875	271.812	105.7	133.1	1831.7	498	343.5		15.7		243.8		423.1	148.7																18.311	17.7		15.259			6.16557	9.85571	13.733	16.174	9.766
				209.3	241.5		589.8			513.719	51	87.7	225.1	1717.8	1035.6	123.75		139.1		185.9		411.4	681																11.292	12.207		16.785			10.5453	7.61677	9.155	20.447	11.292
				85			1040.1			262.406	202.094	194.9	592.9	391.1	554.3	84		297.4		221.4		295.1	128.6																10.681			10.071			9.7463	10.6792	14.648	9.766	11.292
				320.9			175.6			315.5	261.719	845	402.9	399.7	588.4	406		810.8		196.3		293.3	205.1																16.174			12.512			10.4695	12.1944	9.155	9.46	6.714
				26.2			472.6			642.781	169.281	332.9	133.4	924.6	124.7	62.75		71.7		104.9		287.4	45.8																11.902			11.597			16.1821	15.1423	8.85	10.681	8.545
				37.5			129.3			73.9062	880.312	151.2	14.2	155.4	19.7	63.5		56.5		508.3		180.4	535.5																9.155			10.071			8.87894	10.6652	14.954	13.123	7.629
				309.9			735.7			506.188	491.906	242.3	564.5	20.4	375.4	851		62.4		305		164.7	35.9																6.409			10.681			10.2495	10.8651	16.479	12.817	7.629
				97.3			89.6			653.719	19.0938	58.4	323.2	93.4	334.4	157.25		25.8		1208		279.2	192.4																6.409			10.376			10.5897	9.17531	7.324	16.174	10.986
				928.2			152.2			32	0.40625	213.8	246.8	664.3	520.4	731.25		162.3		329		156.5	153.9																13.123			13.733			7.55166	9.0522	7.019	12.512	11.597
				6.8			334.9			152.5	207.281	195.3	64.7	18.8	137.2	233.5		161		99.8		127.7	567.9																12.512			14.343			13.185	8.92991	28.381	28.687	6.409
				128.1			372.5			2248.69	81.5938	67.3	239.8	171.5	67.5	165		334.5		45.3		649.3	61.1																17.395			17.09			8.8207	16.1473	14.954	20.142	7.935
				74.1			119.8			540.219	253.406	297	44.7	72.3	347.6	392.25		765.3		422.6		127.6	33.5																25.33			9.766			14.2184	16.9255	18.616	9.46	13.428
				350.4			267.8			1071.69	31	289.4	274.5	446.5	460.6	678.25		322.5		384.3		216.2	232																43.03			10.681			7.32668	9.63426	13.123	11.902	8.24
				214.5			711			204.594	148	82.3	132.6	826.3	257.1	1170		37.8		265.5		829	302.5																22.583			10.681			8.82482	12.1273	6.104	64.087	6.409
				323.1			384.3			716.5	331.719	38.5	467.6	105.6	228.1	628.5		412.3		739.7		43.2	150.1																34.485			15.259			10.0229	7.90332	6.409	14.954	19.836
				85.5			1239.8			1562.5	384.5	134.9	299.7	411.7	239.7	188.5		118.9		453.2		453.4	111.6																19.836			13.428			9.46266	9.80144	6.409	11.292	7.019
				457.2			3113.4			272	59	1125.9	82.5	140.1	185.4	437.5		1049.9		0.1		398.5	92.2																9.766			9.766			11.664	10.4414	19.531	10.376	19.531
				1051.7			287.8			348.594	1073.59	405.4	535.8	260.2	48.7	222		577		364.6		1.6	393.3																15.564			11.292			11.6172	7.63857	6.409	9.766	11.292
				156.2			583.7			481.625	1472.28	260.7	224.2	1417.8	422	164		246.9		1281.1		157.5	311.1																10.071			9.155			11.698	18.5766	7.935	9.766	11.597
				21.7			919.2			659.688	430.125	73.1	257.6	12	458.5	551.75		416.3		844.1		563	45.5																17.7			10.071			6.33726	13.8503	10.681	11.597	6.714
				621.9			219.4			118.5	697.375	363.3	83.9	386.9	190.2	239.75		122.8		194		127.8	37.1																16.785			11.292			13.7388	11.3715	6.104	11.597	22.278
				252.1			209			145.5	281	62.3	1749.2	198.2	794.6	363		79.7		522.4		375.8	51.1																15.564			10.681			9.14483	9.30615	10.681	11.292	8.545
				578.3			1097.4			962.812	604.906	104	69.8	1336.1	190.7	1292		252.9		162.5		532.1	101.4																9.46			9.155			14.0705	13.2978	8.545	10.071	7.019
				68.8			485.3			982.281	247.906	70.5	141.2	263.2	53.5	214.5		938.8		92.1		233.1	94.1																16.479			9.155			12.2857	9.84796	6.409	14.343	8.24
				137.5			237			710.312	46.9062	171.2	321.6	219.9	357.3	261		563.7		49.9		344.6	140.5																7.935			8.85			15.0753	9.68484	6.714	42.419	7.629
				421.2			573.8			1999.59	94.4062	102.1	270.2	304.7	258.4	247		29.6		776.7		75.4	251.3																9.766			13.733			9.43534	11.5065	10.681	12.512	22.278
				264.6			444.5			87.9062	396.781	64.8	96.6	695.8	477.5	1041.75		92.9		280.8		208.6	37.5																21.057			8.85			8.85487	8.82201	14.954	22.583	6.409
				194.2			14.7			0.28125	566.812	22.5	568.1	234.9	227	39		137.1		21.3		202.1	333																7.629			12.207			8.92711	11.0245	7.019	10.071	26.55
				49.6			253.6			460.406	212.281	741.4	370.4	69.1	217.3	132.75		103.6		80.8		600.3	39.8																12.207			12.512			7.31341	10.5554	8.24	14.648	11.292
				355.6			479.5			533.312	58.3125	286.1	674	412	147.4	63		79.7		452.2		591.4	165.1																7.935			9.46			11.6263	10.9593	8.24	31.128	6.714
				319.4			251			35.5	182.594	390.9	37.4	121.7	12.2	104.75		224		35.5		99.1	55.8																11.292			10.376			8.51896	21.5406	8.24	15.259	25.33
				712.3			592			655.188	1062.09	744.6	193.3	32.4	96	235.75		63.8		226.6		106.7	24.7																17.7			13.428			13.1259	12.3926	6.409	16.174	11.292
				449.8			12.5			523.906	1334.41	16.8	165.3	121.7	26.2	307.25		353.1		210.3		342	745.8																8.24			13.123			7.06836	8.90215	14.038	9.155	6.714
				34.8			434			648.688	163.906	376.8	1274.7	38.4	440.3	630.5		391.1		197.7		84.6	48.2																10.376			11.597			12.182	9.48119	8.24	66.223	6.714
				224.6			287.1			911.312	0.40625	317.8	1427.3	57.2	76.1	647.25		31.9		303.7		298.7	273.6																14.343			8.85			8.96875	9.40155	16.479	41.199	7.629
				63.2			342.8			98.8125	166.781	406	217.2	79.5	147.7	311.75		222.8		251.8		188.6	203																12.512			10.376			11.4264	13.6895	8.85	21.362	7.935
				587.3			395			311	30.2188	79.3	291	52	61.8	120.25		38.4		184.6		280	32.6																11.597			10.376			11.8085	9.93013	13.733	11.292	7.019
				731.5			1135.4			172.094	355.594	249.9	222.6	97.9	1225.8	59		157.8		276.2		406.7	51.8																11.292			10.071			7.86401	8.01799	6.714	11.902	8.24
				124.2			96.8			356.281	97.5938	16.4	875.9	34.7	361.2	1387.25		234.8		524.9		323.6	342																28.381			10.986			12.8734	18.9444	19.531	13.428	7.935
				122.3			86.2			183	76	386.1	26.2	327	110.6	149.25		438.1		87.1		165.3	18.5																22.888			9.46			8.57733	11.059	26.855	9.766	7.324
				60.7			259.3			76.7188	528.312	239	103.7	257.4	395.7	386.5		31.5		78.6		104.8	226.9																17.395			10.376			7.49375	7.84499	18.005	11.292	8.24
				211.9			47.6			396.406	85.9062	135.3	352.9	410.8	771.5	529.25		434		835.1		89.9	184.1																14.343			10.376			6.52637	11.954	15.564	49.133	10.071
				325.7			247.6			374.688	396.094	84.4	413.2	25.6	206.3	244.25		61.5		315.8		453.1	149.1																10.071			9.155			8.89904	11.2512	6.104	32.043	6.714
				172.3			398.9			109.5	195	213.1	81.2	320.4	109.2	54.5		50.1		344.7		334.2	314.6																7.935			11.597			10.1079	11.8909	7.019	13.123	6.409
				1139.8			643.4			198	489.594	266.1	1157.7	1602.5	299.3	520		48.2		415.2		177.2	31.3																26.245			13.733			13.5474	21.6733	7.629	38.757	8.24
				105.7			43.1			324.812	80.6875	236.7	518.5	265.7	82.4	2479		15.8		24.4		171.9	47.3																31.738			10.071			11.0572	12.8872	7.935	30.212	7.324
				211.8			205.8			63.6875	431.625	592.1	52.1	269.9	766.5	1224		1118.7		139.2		683.2	124.2																9.46			17.7			8.85621	13.6656	10.986	10.376	14.648
				585.4			879.8			93.4062	1359.78	994.7	213	172.6	223.4	685.25		375		1206.6		600.5	110.9																9.155			18.005			9.20509	11.681	19.531	11.597	9.155
				57.8			119.4			70.6875	276.219	881.3	249.7	374.7	51.3	811.75		148.5		151.8		140.9	142.7																23.193			9.155			11.4789	9.28025	5.798	65.002	26.245
				164.6			777.1			379.094	289.875	35.1	426.6	204.3	425.7	101		104.9		75.3		536	82.7																11.902			14.343			9.88079	11.4208	8.24	10.071	6.409
				53.8			612.2			73.7188	176.812	462.2	106.8	107.3	317.9	110.5		61		179.1		679.3	77																21.362			10.681			9.35462	18.519	7.324	14.954	12.207
				110.4			65			179.188	102.5	88	425.9	496.5	97.8	168.5		648.1		196.6		362	184.9																32.349			10.986			8.88303	10.3795	8.545	10.376	34.79
				45.8			387.3			201.594	86.3125	318.5	219.2	521.8	222.3	305.5		527.9		66		43.9	296.7																9.155			10.376			8.33192	10.0531	5.798	14.954	10.376
				155.3			100			510.312	267.375	739.5	36.6	182.9	280.4	385.25		212.9		431.9		1149.5	298.3																10.986			8.85			11.3867	9.6974	5.798	10.376	7.935
				150.5			268.3			849.594	410.625	53.8	272.2	536	311.7	268.25		199.9		680.6		725.7	39																17.09			15.564			8.37762	10.6351	34.485	39.063	13.428
				1133.2			170.9			163.906	861.875	99.4	365.8	414.5	393.2	1007.25		84.1		162.8		174.2	175.4																25.024			16.785			11.7453	10.9304	7.324	15.564	10.681
				399.7			566			821.188	175.719	147.8	106.8	201.5	215.8	55.25		159.7		1824.1		213.4	186																8.85			9.155			16.1242	11.7372	5.798	18.311	7.935
				255.8			628.2			217.625	52.7812	2	1304.3	57.3	81.5	9		247.6		351.1		40.7	58.3																19.836			11.292			10.0543	8.88833	10.376	18.005	16.785
				550.4			171			42.5	260.625	159.3	66.6	12.6	242.9	958.5		110.5		240.6		662.8	44.6																10.071			9.155			7.03729	15.0046	16.479	22.278	11.902
				98.7			409.8			0.78125	885.188	314.3	762.8	11.1	781.4	266.75		32.3		616.2		38.5	207.1																9.766			11.597			7.13952	8.68888	13.733	14.343	14.343
				129.3			953.4			89.3125	1223.81	166.7	370.7	323.6	101.2	236		20.4		263.5		54.6	169.4																14.648			11.597			9.87039	9.52297	14.954	12.512	6.714
				359.1			953.9			395.781	634.688	71.2	58.5	9.9	529.2	102.5		769		527.4		341.3	24.5																20.752			11.597			18.0692	10.8211	19.226	9.766	8.545
				902.9			613.8			60.5	32.8125	722.3	158.1	444.3	75.1	225.75		529.1		341.2		302.6	60																28.687			8.85			11.558	8.21205	14.648	10.376	8.24
				367.3			380.5			514.312	257.188	391.4	292.7	395.3	48.7	658		349.9		839.8		98.1	88.3																36.926			9.766			8.0335	10.8486	16.479	10.986	10.071
				1018.8			548.5			98.5	211.594	284	357.1	447.3	151.3	148.5		113.5		329.1		333.3	249.5																17.09			15.259			8.86241	13.7237	15.259	16.174	10.071
				647.3			269.1			257	473.812	10	41.7	62.7	159.6	307.25		101.3		279.6		592.7	155.3																7.019			9.46			7.02942	11.5402	13.733	9.766	9.766
				81.2			18.1			50.3125	69.1875	271	917.5	356.6	428.3	470.5		319		501.8		36.8	38.6																11.292			12.817			10.7371	9.85307	6.409	79.041	8.545
				517.1			452.9			126.094	770.594	98.8	463.6	0.5	362.5	61		18.5		236.3		65.6	51.8																7.019			10.681			17.2142	13.5859	9.155	10.376	8.545
				528			117.4			106.5	318.719	535.4	36	405.6	288	527.25		135.3		824.5		77.5	31.7																9.46			8.85			9.58545	9.11624	14.954	21.362	7.324
				110.6			95			107.594	441.406	1124.2	389.9	101.3	21.2	32.5		138.4		621.7		239.9	83.3																15.869			10.071			11.2386	11.5425	21.057	59.204	7.324
				167.5			790			370.5	526.5	589.5	361.2	176.1	318.4	122.5		399.4		169.4		59.7	29.7																21.057			9.46			10.5756	12.141	11.292	10.681	21.973
				758.6			69.4			334.5	489.594	302.7	652.9	688	79.5	332.5		68.5		876.8		53.1	134.2																7.935			15.259			9.13669	11.3842	9.46	10.071	7.935
				81.2			1501.9			231.594	1376.69	1503.7	21.4	1036.3	56.8	51.75		118		90.9		48.3	139.6																9.46			16.785			15.264	10.4756	22.278	11.902	12.512
				168.3			130.4			312.906	863.594	245.2	17.7	206.7	350.5	647.75		201.7		984.9		614.4	180.9																8.545			11.292			17.1257	8.16197	9.155	10.071	8.24
				131.4			151.5			353.812	851.719	108.1	1184.6	298.3	760.4	33.5		71.6		511.9		264.2	175.6																11.597			9.155			6.33888	10.3	6.409	25.33	7.324
				127.3			1064.6			343.688	133.594	485.3	289.2	41.3	290.6	470.5		197.4		1024.6		61.3	90.4																8.24			10.376			11.2851	7.84983	18.921	12.817	8.24
				75.8						474.594	89.3125	64.9	472.5	28.8	1535.1	1191.25		365.4		858.8		63.1	150.9																23.193						9.49006	10.209	10.986	13.428	17.09
				86.1						538.812	734.781	864.2	382	158.3	791.9	544.5		34.4		16.1		98.1	67.2																11.902						8.65122	11.5332	13.123	12.207	8.24
				53.2						1177.59	559.094	26.9	86.1	341.4	34.7	305		88.7		466.6		82.4	126.5																13.123						14.6478	8.42425	19.836	12.207	6.409
				11.3						286.312	414.219	730.8	151	42.7	1052.6	122.75		412.1		157.7		148.3	127.9																12.207						8.27423	10.8705	9.46	14.038	7.935
				137.1						125	213.594	50.7	435.1	156.7	146.9	735.5		18.6		325.5		44.8	475.7																26.855						7.71026	7.85735	27.466	21.667	11.902
				375.5						468	580.188	116.3	184.4	647.7	594.6	942		29.7		318.8		517.1	324.2																7.935						6.27069	13.9034	18.311	9.46	32.043
				54.9						65.1875	462.812	549.3	97.9	549.6	92.2	88.75		142.9		312		472.4	42.3																15.259						8.50024	12.6166	6.104	16.174	10.376
				250.2						33.4062	1499.81	1144.2	545.3	98.5	156.8	164.25		331.8		613.8		162.1	120.8																7.629						7.33114	11.588	27.161	12.817	13.123
				81.9						210	1405.81	617.4	2557.7	2798.8	62.6	100.5		646.4		17.7		259.3	425.9																15.869						6.91626	14.8619	11.292	13.428	16.479
				487.1						233.688	424.875	831.3	342.6	15.1	100.3	425		52.1		190.5		231.8	176.6																12.817						14.0033	14.7746	6.104	11.597	7.324
				140.9						112.312	2003.19	119.7	819.7	597.6	161.7	89.75		274.6		2385		140.7	70.3																7.629						9.17861	15.9959	10.376	16.174	6.409
				72.4						446.406	1084	314.5	262.1	61	145	19.25		131.1		298.1		381.2	184.2																8.545						18.865	11.8059	16.174	14.038	7.019
				177.1						512.594	181.938	44.4	16.9	448.2	134.9	59.5		132.4		118.2		68.3	84.7																13.428						7.89627	7.71527	9.46	17.09	10.071
				140.4						416	713.375	37	387.7	201.7	51.4	1062.5		94.5		648		42.2	211.2																31.433						6.53683	12.5701	6.104	11.597	6.714
				30.1						189.188	628	801.9	1974.6	629.8	502.1	372.75		50.3		62.7		209.5	226.1																12.817						8.96903	18.6467	7.019	17.09	6.714
				268.4						0.40625	553.188	268.4	100.4	519.3	851.4	94.25		17.8		390.4		255.4	43.3																10.681						8.85986	15.68	18.311	9.766	9.155
				1.4						633.312	528.438	74.3	42.9	708.4	383.4	1048.5		414.1		130.9		370.9	79.9																11.292						12.6492	9.21287	9.766	12.817	11.597
				336.9						330.188	129.188	13.3	245.9	218.1	85.6	155		11.5		1220.3		405.5	126.5																14.343						18.8324	10.7201	12.817	14.954	9.155
				246.2						319.906	913.375	220	485.9	209.2	276.4	412.75		21.4		352.7		178	217.3																8.24						8.36098	8.27649	6.409	16.479	7.019
				46.2						465.281	42.3125	578.5	82.4	418.3	341.4	236.25		79.6		399.5		41.6	123																14.648						9.21996	12.969	8.24	12.207	6.714
				321.6						277.719	795.125	857.2	681.8	39.5	405.2	68.5		24.3		526.9		154.5	40.3																9.766						6.43844	10.2178	8.545	10.986	7.629
				496.3						506.594	1052.06	162.9	29.6	395.8	794	203		230.9		313.9		192.9	284.5																27.771						15.5962	9.39836	20.752	15.869	6.714
				489.7						190.594	898.188	220.6	1526.1	540.4	55.1	428.5		226.5		673.8		614	157.9																17.09						10.8506	11.3549	22.278	15.564	18.005
				246.7						301.906	733.5	184.1	35.9	132	150	91.75		192.1		635		48.1	263.8																30.823						10.5435	7.64979	29.297	10.681	7.629
				227.6						145	615.625	657.6	117.6	233.8	260.4	148.25		571.4		230		154.5	721.8																7.629						10.523	11.146	7.935	9.155	11.597
				51.8						503.406	454.188	167	343.8	85.9	667.6	683.5		39.8		145.5		200.1	321																8.85						9.44464	10.9929	9.46	13.428	13.428
				32.1						228.094	560.438	520.9	216	51.4	1349.9	928		307.4		188.3		127.7	69.9																13.123						13.718	11.2662	8.85	12.207	9.155
				96.2						272.812	974.5	70.1	312.9	1029.5	318.8	146		502.5		496		14.6	238.1																8.545						13.1195	9.3055	17.395	10.071	20.752
				232						69.875	1463.19	81.7	90.6	81	113.6	688.5		91.7		1635.1		1114.5	257																19.531						10.6028	7.25945	10.376	15.259	12.207
				179.4						242	2155.31	141.6	531.4	123.1	590.3	243.5		21.5		389.3		13.1	72.5																20.752						8.10723	8.88454	7.324	21.667	7.629
				289.7						40.7188	267.25	364.2	138.4	136.5	98.5	1054.25		188.2		735.9		24.3	163.4																24.414						11.3096	10.2525	17.395	17.09	8.85
				59.2						351.688	647.75	733.7	8.9	871.2	282.1	12.25		182.3		537.5		572.3	301.5																19.531						7.61237	8.1514	13.733	12.817	8.24
				232.4						108.812	909.188	609.9	96.9	92.2	808.3	534.75		61.8		1176.5		111.5	786.5																7.629						9.59685	17.3759	16.479	11.902	12.512
				379						1025.19	73.1875	102.2	1104.8	306.3	157.5	227.5		18.8		186.9		27.9	278.5																19.531						13.8285	8.8226	6.104	9.155	8.545
				645.3						78.7188	464.625	255.8	14.7	286.7	323.6	59.75		341		1292.6		156.2	247.6																36.011						9.52926	12.0378	12.817	10.986	7.935
				443						34	380.375	239.2	802	304.5	434.2	629.25		80.1		881.2		630.4	354.6																19.226						10.9272	12.7543	36.926	12.512	14.954
				397.7						337.375	458.188	305.7	810.9	326.3	315.5	1013.75		116.6		153.2		471.4	49.7																20.142						8.93267	10.1526	9.766	14.343	6.409
				71.9						350.906	162.938	84.6	60.6	396.1	286.5	101		193.8		34.3		99.4	144.1																20.142						8.78178	13.4768	9.766	12.207	29.602
				365.3						32	145.688	235.5	604.6	32.8	630.1	66.75		126.4		120.7		497.8	53.2																8.24						12.9503	10.155	8.545	16.479	6.714
				144.7						406.594	314.812	34.7	297.4	456.1	130.9	304.5		68.8		188		78	77.6																16.785						7.07724	12.4236	17.395	9.46	12.207
				160.5						0.40625	409.375	166.3	1843	775.6	387.6	454.75		148.8		752.7		116.2	155.4																25.94						6.99127	8.53752	6.714	25.33	12.207
				136.5						311.5	761.5	535.4	212	90.3	354.3	82.25		46.8		111.7		68.2	70.9																14.343						11.2381	9.27123	15.869	15.869	7.629
				192.5						405.719	115.375	244.2	21.4	337.2	163	196.5		361.4		1118.7		925.1	177																14.648						9.27269	8.06912	7.629	20.752	6.409
				912.4						243.188	572.438	956.3	1183.7	116.2	515.6	17		113.2		374.3		63	41.7																22.278						8.00007	6.08724	7.019	21.057	7.324
				420.8						152.688	48	50.8	347.4	102.4	363.3	101.25		392.4		268.1		269.4	135																25.024						9.18981	8.89039	6.409	9.766	15.564
				212.3						175.719	1365.81	518.7	312.1	1235.2	528.6	146.5		245.6		1240.9		49.7	202.6																38.452						8.7081	8.34362	8.545	13.428	7.629
				17.5						0.40625	96.75	282.3	397.7	115.2	355.3	147.5		109.9		1450		117.4	206.4																30.518						8.74279	16.2127	6.409	9.46	14.954
				50.7						297.594	925.625	1066.7	545.6	273.7	53.5	260.25		26.5		21		155	784.5																10.376						7.30931	8.58967	6.714	12.512	7.935
				519.5						0.1875	1258.69	576.9	186.7	72.2	80.7	251.25		99.9		882.8		325.8	561																6.409						7.27656	9.67709	6.409	17.09	12.512
				267.8						399.312	243.688	217.7	35.6	150.4	130.9	36.75		42.2		90.5		182.8	233.1																13.428						17.7575	13.2261	6.714	10.071	21.057
				279						139.094	394.312	115	67.3	241	46.1	521		92.8		1504.8		409.7	41.2																11.292						9.14508	10.5813	6.104	18.311	7.935
				415.3						137.594	160.625	165.9	70.2	285.1	215.6	50		172.8		342.8		172.6	539.6																18.616						8.50097	12.3963	13.733	18.005	6.409
				294.3						271.906	323.562	108	109.1	0.9	11.4	62.75		26.7		91		59.9	54																9.155						13.9653	15.019	19.226	15.564	7.019
				262.3						137.406	344.25	211.2	321.5	629.4	499.3	211		27.3		49.4		328.5	84.3																16.785						8.93908	9.82093	10.071	13.428	7.935
				120.1						699.406	632.875	366	41.2	292.1	849.6	112.25		34.9		435.8		97.8	185.6																9.46						17.519	11.785	8.24	9.155	17.09
				111.5						126.906	221.812	108.8	185	413.8	925	476.25		638.3		547.5		476	125.4																24.719						10.3232	7.62882	7.629	10.986	9.155
				46.8						136	391.562	360.6	32.6	20.2	337.8	111.25		461.7		551.4		201.8	189.2																17.7						8.25463	8.1852	7.019	11.902	7.935
				981						312.688	64.25	484.8	801.9	102.4	1415.2	91.75		29.1		211.1		187.5	183.6																22.583						7.06567	7.64275	7.324	9.766	6.714
				453.2						0.40625	261.562	97.3	137.8	595.4	227	77.75		66		217.5		28.8	43.4																14.343						7.14383	9.16829	9.155	26.245	15.869
				94.1						397.188	797.125	122.2	443.7	141.1	52.5	155.25		68.8		263		170.5	61.4																39.673						10.8206	8.85172	12.512	24.109	7.019
				382.2						150.594	414.375	112.6	737.1	270.4	597.5	454.5		146.6		734.6		778.4	313.7																8.24						9.57082	17.0699	7.324	11.902	6.409
				436.8						209.406	846.938	40.5	17.5	613.3	143.6	925		84.4		168.1		241.5	218.8																19.226						11.9826	8.17822	10.986	22.278	11.902
				118.7						1265.5	89.0625	526.1	206.6	189.7	379	415.25		25		497.4		200.2	52.7																17.7						8.40669	8.6702	21.667	22.278	7.935
				465						137.312	251.688	98	453.9	129.2	614.1	1188.75		50.1		501.2		119.8	230.2																16.785						10.6869	10.8408	6.714	21.973	10.071
				7.6						601.781	951.25	359.4	363	156.4	11.4	490.25		292.4		832		118.2	30.7																7.019						13.6995	14.559	15.259	26.245	8.85
				42.9						123.907	166	45.3	7.6	584	211.3	153		208.7		525.7		94.3	294.9																16.785						9.77805	16.1415	12.817	18.616	10.681
				93.3						185.218	319.25	89.1	41.2	588.1	307.9	513.75		202.2		112.7		240.5	419.5																9.46						10.0176	18.2918	10.986	36.621	12.207
				2.3						49.1875	85.5	209.3	229	231.4	303.4	619.75		145.8		262.8		16.7	188.2																15.869						14.9003	10.053	10.376	10.071	6.409
				629.9						2059.81	151.312	105.5	186.5	21.7	399.2	2882.5		49.2		1254.5		481.8	19.9																19.836						9.75534	11.0131	10.376	10.071	13.428
				317.4						1582	1079.44	20.3	377.5	732.7	163.6	76.75		59.6		1917.6		145.9	59.3																11.597						8.39626	9.22464	10.681	11.597	9.766
				163.7						292.688	468	114.3	194.5	117.7	554.4	58.5		69.3		488.2		451.5	256.7																11.597						9.63929	8.94849	10.376	35.706	15.869
				78.2						617.812	757.188	48.3	1680.2	260	768.6	44.75		32.8		365.6		754	398																17.395						10.3159	9.84557	10.986	14.954	18.005
				458.3						304.188	250.062	384.4	9.8	235.7	640.3	521.25		120		78		38.5	86.9																8.85						13.9459	11.5194	8.24	10.986	16.174
				118.4						1906.31	581.312	864.3	12.5	609.1	247	652.75		179.2		90.6		137.3	244.9																13.428						6.70256	11.9947	16.174	9.766	8.24
				289.2						832.594	239	494.4	12.1	210.4	716.1	534.75		1028.1		363.7		154	782																13.428						8.6421	19.2979	9.46	9.155	6.409
				318.6						399.781	578.125	267	28.3	137.3	683.7	62.25		118		403.6		329.8	41.2																9.46						13.2236	8.23208	15.869	10.986	7.629
				647.8						44.2188	138.5	116	427.3	0.7	960	102		27		69.9		279	195.2																16.479						7.26174	8.16364	12.207	17.7	9.46
				184						1141.59	413.562	507.7	42.9	538	163.8	121.25		146.3		188.7		329.3	91.4																12.512						19.1996	8.05955	16.174	47.607	39.368
				16.8						213.188	948.812	275.1	483.6	910.1	501.1	334.5		54.7		274.5		148.8	198.1																7.019						7.8204	10.0366	11.597	13.123	6.409
				405.1						37.4062	984.625	133.3	48.6	90.1	32.1	39		26.9		156		452.9	564.8																23.499						10.4106	14.8105	8.85	27.466	7.019
				863						0.3125	729.812	48.7	1112.4	685.6	867.2	36.75		98.5		68.9		230.9	121.7																31.128						10.3377	9.38163	11.597	9.766	8.24
				1584.8						0.28125	53.875	656.7	1565.5	124	849.2	849		323.1		57.4		20.1	141.1																18.616						10.3054	7.58144	6.714	15.564	8.24
				590.3						444.812	597.5	71.6	577	164.7	617.2	987.5		200.3		765.6		491.1	46.5																16.174						8.42559	35.2425	22.278	9.46	10.681
				87.3						236.688	126	218.4	244	267.9	610.4	172		307		437.8		456.1	388.7																10.681						10.8445	10.0877	21.362	12.817	7.324
				482.2						437.5	768.375	678.2	29.9	658.1	445.1	39		100.7		192		136.1	192.6																30.823						13.3351	10.937	22.583	18.311	12.817
				38.6						530.812	674.625	22.7	460.3	97.5	320.5	45.25		91.1		68.9		72	278.4																23.804						10.0738	10.0735	11.597	11.292	6.714
				72.4						662.094	121	86.8	265.8	904.4	763.3	488.75		114.1		211.9		72.1	94.7																18.005						11.475	13.4589	15.869	12.207	10.986
				152.8						152.406	288.188	26.2	68.8	1838.7	82.7	723		27.2		424.3		15.3	747.4																18.005						20.2692	11.9729	27.771	15.564	15.259
				351.9						398.188	176.312	336.1	77.9	28.3	146.8	363.75		34.3		700.3		608.8	356.1																21.057						7.63086	6.9942	14.648	11.597	21.973
				141.8						130.906	247.375	97.7	1278.1	66.2	150.3	1131.5		61.2		84		55	153.2																9.46						10.6343	9.21347	8.545	23.804	8.24
				303						286.094	2004.94	344.1	70.6	293.9	19.4	955.5		16.8		291.5		272.5	325.9																17.09						7.5903	11.1096	10.071	29.602	12.817
				873.2						0.40625	304.688	759.4	768.7	93.2	799.8	157.75		196.8		114.9		81.8	155.6																6.714						7.67397	14.2331	8.24	40.283	14.954
				138.8						329.719	347.312	165.1	1044.8	38.6	375.8	778.25		37.1		102.3		335	22.3																10.071						9.43687	23.3638	10.681	18.921	7.324
				115.2						275.875	432.562	45.8	1035.7	562	149.6	29.75		275.8		165.8		105.4	461.7																10.071						14.0772	19.9088	5.798	9.46	7.935
				396.8						340	470.5	56.1	212.8	81.2	147.8	798.25		216.4		106.1		87.2	616.8																21.667						9.85409	13.0196	15.564	10.986	6.714
				85.1						1066.31	294.75	2.4	375.2	197.3	115.9	101.25		107.2		328.6		430.4	172.3																27.161						10.232	10.6857	18.616	22.278	7.019
				310.6						681.406	638.375	280.8	251	75.9	181.4	62.5		0.9		211.3		20.7	12.3																17.09						12.686	18.2913	12.207	10.071	11.902
				528.9						342.906	799.688	399.3	116.8	422.4	228	60.75		591.3		73		19	348																25.33						8.0914	9.06366	13.123	13.123	6.714
				874.5						266.094	427.5	312.5	41.1	210.3	45.7	291.5		228.9		723.3		93.6	928.8																7.324						11.1643	10.0863	6.104	9.155	6.714
				2.4						206	177.812	253.8	1378.4	454.3	21.2	91.75		73.1		1711.6		449.9	184.7																16.479						7.64186	6.56477	21.667	12.512	7.019
				49.6						342.688	440.188	561.9	518.2	338.1	458.1	182.75		145.7		427.7		493.5	31.9																12.817						8.10977	9.27717	10.681	58.899	9.155
				8.2						622	118.312	175.2	111.1	480.9	170	458		129.3		40.9		291.9	174.9																19.531						14.2054	12.9937	9.46	13.428	9.46
				611.1						863.906	485	9.8	50.8	33.8	635.1	263.75		47.9		127.2		141	332.4																29.907						7.34757	15.2431	12.512	10.376	28.687
				222.9						1181.19	255.875	196.5	210.8	851.5	667.6	69.25		18.8		34.1		94.5	48.9																14.343						8.12404	10.4562	9.155	22.888	16.174
				283.1						643	833.125	242	759.1	284.5	448.6	334		39.6		469.5		987.1	447.5																53.101						15.4826	6.72802	10.376	12.817	13.428
				674.7						589.312	1490	183.2	210.3	296.8	147.7	32.25		35.5		358.9		110.7	550.5																34.18						28.9139	10.7144	12.817	20.447	21.057
				169.8						165.188	93	110.7	526.2	161.7	527.8	35.25		224.6		79.5		393.3	147.6																13.733						11.1745	9.25502	15.564	10.986	15.869
				23.3						250.719	48.375	66.5	1094.3	44.1	69	1135.5		151.7		109.3		200.7	536.9																26.55						11.2813	7.27147	8.545	9.46	6.714
				57.4						541.906	543.5	175.9	124.2	58.4	1830.1	306.25		1111.5		336		520.6	87.3																8.545						8.3419	11.3244	7.629	37.537	7.629
				148.5						390.375	1002.5	30.6	855.1	554.8	100.2	286.25		88.6		440.7		322.1	177.6																8.24						9.85723	16.6237	30.518	17.395	7.935
				109.8						703.906		41.4	538.3	38.4	546.9	223.25		100.6		112.8		175	135.4																7.629						10.6567		7.019	17.7	6.714
				397.9						483.906		90.2	563.4	121.8	224.9	759.5		108.2		170.4		473.3	16.5																12.817						11.9104		12.512	14.343	7.629
				410.1						128.406		96.3	317.1	28.6	132.1	656		65.8		127.4		521.1	54.9																6.714						6.78905		8.545	16.479	8.85
				167.4						130.906		9.2	65.4	61.1	71	317.25		246.6		1342.7		130.4	122.7																43.64						12.1641		11.292	13.733	9.155
				564						57.875		535.1	174.8	1003.8	987.6	120.75		468.2		354.9		162.1	240.9																10.986						10.3194		7.629	31.738	11.597
				168.5						1189.62		1130.9	72	443.9	23	236		47.7		251.1		430.2	556																28.687						8.51987		7.019	11.292	9.46
				241.9						247.875		201.3	625.5	933.7	226.2	207.75		854.1		80.1		337.3	34.7																24.719						20.4796		26.855	12.207	6.409
				41.2						67.3125		24.1	114.8	280.2	317.3	716.25		22.1		0.9		23.4	288.7																7.629						8.62638		16.785	13.123	7.324
				530.3						129.688		238.3	21.9	263.6	326.8	204.5		123		113		268.3	389.1																17.7						16.761		25.94	11.597	16.479
				408.4						173		72.7	445.5	255.4	245.5	174.5		283.8		857.6		380.3	163.9																45.166						16.0057		18.311	16.785	8.545
				336.2						427.406		141.7	180.1	158.2	504.9	324.5		300		70.8		291.7	111.3																22.278						10.7667		17.395	43.335	11.597
				173.1						402.219		238.7	89.9	422.5	460	254		295.5		103		120.4	45																7.019						14.9634		6.409	11.292	17.7
				227.8						330.688		1027.2	110.3	960.6	615.2	2524.5		43.2		80.5		1394.9	37.9																7.324						9.61201		11.597	9.155	17.395
				32.7						277.406		118.9	125	333.9	95.6	539.5		48.4		1166		607.8	163.1																10.681						7.72234		7.019	12.817	9.766
				362.5						62.5		1345.1	79.4	135.6	37.4	35		323.7		477.2		131.4	35.9																12.512						7.10362		7.324	9.46	8.545
				332.3						179.188		99.8	224.1	1162.3	863.7	402.25		79.9		173.6		199.9	77.8																11.902						9.41463		12.512	10.681	10.071
				342						409		273	318.4	316.7	320.8	1056.5		37.4		224.5		176.6	97.7																19.226						9.02203		11.597	9.766	8.85
				202.1						66		808.5	609.9	230.3	258.9	1043.25		284.3		2078		30.6	48.2																14.648						8.15655		8.24	19.531	15.259
				260.1						335.312		197.7	185.1	500.9	246.8	83		138.1		62.2		788.4	13.9																28.992						7.15272		6.104	14.648	6.714
				216.1						433.188		222.8	40.8	542.5	456.4	318.5		168.2		86.7		96.2	427.4																25.635						13.365		11.597	9.766	7.935
				196						1293.09		119.7	188.7	74.8	172.4	170.25		250.5		1393		78.7	394																6.409						9.0221		11.292	11.292	9.46
				71.4						689.312		389.1	1365.3	306.4	184.1	357		59.5		48.7		471.1	101.1																9.766						11.0534		24.719	23.499	6.714
				115.7						63		57.1	119.3	499.6	1517.4	199.5		71.4		117.5		296	443.5																19.226						8.533		8.85	10.986	6.714
				198						1026.81		677.9	112.9	120.2	1124.7	104.5		318		368.5		465.9	36.7																15.869						8.80122		10.376	16.785	6.409
				857.3						197		26.5	242.6	129.2	243.3	401.75		39.4		419.5		175.5	301.7																14.038						8.90265		9.46	10.071	13.733
				322.1						103.188		45.9	147.5	98.3	615.3	283		53.4		121.5		787.3	211.4																11.292						15.3883		10.986	11.292	7.019
				39.6						785.688		277.9	57.2	22	252.2	267.5		117.7		472.1		840.2	104.4																15.564						10.9198		6.409	9.766	9.46
				228						206.5		121.4	613.6	2026.4	821.6	212.5		291.2		113.1		41.5	328.9																13.733						13.1337		12.207	11.292	10.986
				372.6						1679.62		48.1	107	1505.3	175.5	283.5		73.7		112.2		935.7	305.5																13.733						10.5646		20.752	79.956	9.155
				146.9						577.812		62.3	360.6	273.5	107.1	312.5		67.7		194		522.9	93.4																35.095						7.51981		17.395	11.292	6.409
				580.8						499.5		270.4	129.7	540	1239.7	68		169.2		354.4		115.3	54.9																7.935						8.46585		18.311	14.954	6.409
				355.9						421.875		308.5	249.7	479.8	866.9	178		430.6		625.9		168	291.6																17.395						10.1813		7.019	14.343	9.46
				24.3						445.688		162.7	335.3	31.9	274.2	169.5		249		470.7		121.5	153.6																7.935						9.76926		10.376	22.583	14.343
				192.8						862.812		235.3	422.4	439.6	46.9	72.25		314.8		135.4		432.4	96.8																6.714						9.53061		6.104	33.569	9.46
				305.6						651.625		481.7	74.2	1055.9	1354.6	524.5		199.5		167.1		222.9	204.2																17.09						7.20748		31.128	10.376	6.714
				196.4						653		553.1	929.8	514.5	1567.3	74.5		68.1		480.6		375.2	123.3																10.071						9.66443		17.7	14.343	18.005
				37.9						349.062		82	84.2	159.4	751.5	74.75		208.9		15.4		16.6	103																12.207						12.4976		12.512	12.817	8.545
				145.1						35.8125		532.7	313.3	289	522.2	388		21.4		466.3		36.2	293.4																11.597						11.8565		9.766	9.766	7.629
				28.9						1933.38		190.7	375.7	105.2	19.1	33		107.8		531.2		24.3	331.7																10.376						12.6179		19.531	20.752	8.24
				117.1						51.125		91.6	1132.4	286.7	366.3	294		370		199.2		36.4	219.4																17.395						10.8849		7.324	10.986	10.071
				41						374.688		120	62.7	639.7	210.5	61.5		244.8		1077.2		85.3	491.9																14.038						9.65308		11.292	10.071	18.921
				152.1						1335		224.9	771.7	254.7	104.6	426		272.6		343		105.3	547.7																44.25						13.6035		14.648	44.25	11.597
				481.2						957.625		312.2	139.9	302.6	741.1	697.5		480.4		36.6		281.5	67.9																11.597						18.557		12.207	26.245	15.564
				511						3146		595.6	468.1	275.6	901.2	1041.75		302		453.1		125.4	407																7.324						10.4173		43.64	12.207	9.155
				282.2						124.875		38.3	19.8	63.1	28.7	58		1527.3		37.4		20.1	77.5																33.569						10.3343		14.648	31.738	10.071
				89.5						351		68	461.4	611.4	1135.6	421.25		659.1		521.3		86.9	268.5																7.935						6.98698		6.104	15.564	8.85
				384.6						709.438		70.9	737.7	221.3	36.1	820		75.6		193.2		123.8	49.7																43.03						12.2413		7.019	24.414	7.324
				115.3						807.75		395.9	171.2	243.5	70.3	304		17.6		29.3		167.8	34.6																11.902						16.5207		17.09	12.817	21.973
				742.5						723.438		978.4	20.8	355.4	2057.1	735		27.8		384.8		345	111.3																7.629						8.13834		22.278	10.681	17.09
				184.7						121.875		552.4	332	36.4	213.7	240		636.6		682.3		48.5	24.1																17.395						15.9881		6.409	11.292	7.324
				197.4						262.188		296.8	119.9	296.5	51.7	107.25		20.4		138.9		115.8	396.1																39.978						7.87281		14.343	38.452	9.46
				113.5						64.25		909.3	169.1	126	691.6	28.75		770		172.7		115.9	1222.6																10.376						12.1602		22.583	16.479	24.414
				104						355		564.7	287.8	202.9	784.2	449		177.4		205.5		51.4	266.5																28.992						8.43994		14.648	13.123	15.564
				59.9						595.25		29.5	479.5	541.2	176.4	425.5		82.1		246.8		110.6	148.1																9.155						8.60246		12.512	12.512	6.409
				74						174.438		127.8	308.8	202.3	824.1	515.75		864.3		62.9		141.2	184.3																10.071						11.8908		15.564	14.954	6.714
				404						962.875		724.8	228.2	420.4	1610.4	560.5		57.7		108.4		201.5	144.6																7.629						14.0286		6.714	16.479	7.935
				58								95.1	64.3	124.7	30	915.75		369.7		392.4		311.1	1151.5																29.907								10.071	12.207	19.226
				23.2								86.3	151.3	122.5	92.1	1028		130.2		434.2		172.2	64.5																8.85								10.986	31.128	11.597
				122.5								107	261.9	202.4	43.5	953.25		158		1445		254.3	111.8																17.09								7.629	9.46	27.161
				465.7								226.1	107.4	655.7	933.6	242.75		145.6		21.2		76.5	533.7																21.667								18.921	11.292	7.324
				168.7								333.1	433.9	654.9	124.5	584.75		270.8		979.6		210.4	41.8																9.46								8.545	19.531	14.954
				23.8								236.8	863.6	785.4	480.9	217.5		457.5		13.8		70.9	82.3																9.46								9.46	15.869	30.823
				185.3								122.8	225.3	18.7	358.9	315.75		525.3		173.7		228	633.2																7.019								12.512	11.292	12.207
				117.2								97.7	36.3	466.9	323.2	252.5		562.6		119		62.4	387.4																20.752								23.804	42.419	8.24
				58.6								92.4	314.7	214	520.5	361.75		762.2		684.3		299.7	172.5																14.954								6.104	12.207	10.681
				244.5								132.7	270.8	461.7	242.9	314		46.2		217.2		145.1	46.4																18.921								6.714	15.564	9.155
				142.6								194.5	89.2	726.4	1444.6	139		723.4		287.1		165.6	82.8																14.648								36.011	9.46	6.409
				110								245.9	614.5	231.3	12.3	211.5		63.4		379.1		42.8	30.8																7.935								5.798	28.076	7.019
				151.7								544	406.8	320.2	388.5	772		504.8		798		57.7	290.3																18.616								7.629	12.512	12.207
				922								574.8	509.8	36.8	6.7	218.5		44.1		417.1		197	357.6																15.564								5.798	11.597	8.24
				80.1								274.8	469.6	644.7	247.9	47.75		460.2		424.1		57.6	482.2																14.038								6.409	25.94	13.123
				265.8								136.2	77.6	358.8	137.2	1008.75		729.8		317.1		239.2	211.4																22.888								14.038	11.902	9.155
				18.3								356.8	305.6	419.3	741.3	73.75		929		550.4		91.4	193.9																16.785								7.935	13.733	7.324
				484								204.7	856.9	82.6	179.9	405.5		250.1		1722.1		82.1	127.5																12.207								12.817	30.518	8.24
				30.5								596.2	369	1285	431.3	23.5		157.5		521.9		117.3	47.6																18.311								7.935	28.381	6.714
				61								129.4	159.5	346	92.3	69.25		84.2		421.8		84.6	129.2																11.292								9.46	11.597	11.902
				107.6								152.9	23	737.2	149.4	131		163.7		388.4		245.3	80.1																9.46								13.428	13.123	9.46
				144.2								376.3	1437	1280.9	1322.8	1056.5		92.1		205.8		58.5	102.7																18.921								16.785	32.959	13.428
				222.7								55.8	37.1	266.4	356.1	495		1004.4		581		65.8	617.4																17.09								8.24	49.438	15.259
				111.6								479.3	470.8	427.4	488.3	477.5		284		511.7		59.8	11.5																7.324								5.798	10.376	6.714
				162.4								535	78	561.7	1123.5	124.5		54.6		147.3		30.9	165.8																10.071								9.155	25.635	23.499
				103.7								251.2	235	151.1	427.1	100		547.5		256.9		17.7	263.6																13.428								16.785	14.954	18.005
				124.6								614.9	1193.2	58.7	226.6	347.25		378.7		575		56.5	78.3																14.954								7.324	11.292	6.409
				60.8								133.6	35.6	327.8	497.1	209		264.4		982.6		94.9	388.6																33.264								10.986	9.766	8.85
				297.3								264.1	201.7	123.4	287.2	684.75		233.9		649.4		370.6	107.8																8.545								8.85	11.597	9.155
				155.5								1172.2	162.6	727.4	194.4	267.25		447.1		1753.2		57.8	92.7																12.512								7.629	21.362	14.954
				260.7								17.9	823.6	1288.3	89.1	43.75		468.6		164.5		310.8	176.5																7.324								15.869	21.057	9.766
				255.6								543.9	99.9	164.9	243.8	544.75		146.2		25.2		97.3	185.1																6.409								22.888	11.597	6.409
				16.2								1434.3	228.1	226.6	178.7	74.5		281.6		242.5		128.2	123.9																26.55								15.869	17.09	11.597
				71.4								154.1	759.6	964.8	813.5	91.75		82.7		374.2		26.7	216.6																24.109								8.24	26.245	7.324
				178.8								122.2	278	304.4	369.7	36.75		380.9		698.8		55.9	558.3																10.986								7.019	32.959	7.629
				53.2								243.1	86.8	297.3	464.4	944.25		11.8		481.5		148.8	25.9																6.714								11.902	18.311	7.324
				240.4								122.8	854.7	231.9	578.3	175		121.1		236.6		210.2	124.6																8.24								12.207	24.109	6.714
				234.7								364.4	943	69.5	323	130.75		269.6		1086.4		219.1	575.4																10.681								13.123	16.785	6.714
				142.9								66.7	199.1	1295.5	80.3	192		126		57		116.4	142.1																11.597								18.311	15.259	9.155
				217.8								73.3	1340.5	33	34.6	362.25		313.5		680.8		45.7	394.5																7.324								7.019	12.207	9.155
				309								27.9	324.4	1839.1	712.9	273.75		196.5		658.3		177.7	213																7.935								23.499	18.616	6.409
				460.1								418.5	530.2	617.3	275.5	166.5		80.3		730.4		274.5	401.3																8.85								16.785	13.123	16.174
				288.7								70.9	319.6	445.7	852.5	586		328.8		319.6		36.7	95																10.376								16.174	22.278	9.155
				128.2								110	580.3	1063.2	164.4	158.75		480.4		915.7		124.5	93																12.512								18.005	10.681	9.766
				325.5								91.4	374.6	459.8	259.5	160.75		102.1		222.1		154.5	346.9																7.629								27.161	22.888	20.142
				634.8								84.2	171.8	742.1	129.1	43		20.6		108.3		129.2	41.6																15.564								8.24	10.071	14.648
				20.9								910.9	51.8	307.4	206.8	436		598.1		220.3		78.9	76.8																15.259								6.104	25.024	35.095
				75.6								130.1	163.5	1477.8	46.5	71.5		533.8		370		27.4	34.6																14.038								15.564	9.46	13.123
				70.5								581.4	127.2	507.6	164.7	91.5		53.6		369.2		57.4	23.7																9.46								13.428	9.46	30.823
				336.7								488.7	808.2	284.9	100.4	287.25		108.8		302.9		82.7	310.8																17.09								14.648	17.395	6.714
				267.7								320.1	1321.1	290.6	343.4	552.25		361.1		640.8		89.8	32.5																8.24								7.019	16.479	6.714
				88.3								56.4	114.9	740.1	103.9	167.25		232.5		1090		221.3	17.3																6.409								12.512	13.123	12.817
				487.1								8.6	550.4	768.9	390.3	205.25		170.6		251.4		59.8	227.8																14.038								6.104	43.335	9.46
				53.9								11.5	876.3	2137.8	17.4	61.75		153.7		26.6		117.5	74.6																11.292								8.24	16.479	8.85
				38.5								198.4	292.5	253.3	320.4	143.25		101.6		33.1		209.5	151.7																27.771								19.531	9.46	7.935
				64.3								855.1	158.2	913.5	271.6	411		333.6		1045.1		224	59.9																6.714								8.24	9.766	9.155
				292.1								163.2	314.4	1454.6	178.8	118.5		183.7		587.4		197.1	386.5																7.629								22.888	14.038	15.564
				150.8								99.4	236.3	1170.7	287.9	178.25		251.2		434.4		39.4	117																8.545								10.681	56.152	14.343
				30.8								72.1	654.8	330.7	862.9	204		0		42.7		88.5	320.5																33.875								8.24	12.207	13.123
				119.4								301.3	252.6	402.4	406	436		763.7		375.2		66.9	76.1																14.648								10.071	14.038	24.414
				794.1								26	1141.4	9.7	390.7	279.25		57.5		744.4		41.4	133.6																14.648								21.057	13.428	11.292
				151.2								917.3	188.3	195.9	835.4	122.5		107		443.6		223.3	116.1																23.193								12.207	31.128	7.629
				66.9								372.2	200.5	287.6	576.3	234.5		498.3		205.2		138.8	323.4																10.986								18.311	19.836	16.174
				33.7								327.1	181.1	557.6	1062.3	461.25		35.2		943.5		181.4	52.4																14.954								19.226	14.038	6.409
				48								197.1	59.7	1380.2	91	66.75		469.1		102.8		140.5	29.5																12.207								13.428	14.648	10.071
				31.3								0.9	374.3	104.7	852.1	246.75		412.2		902.4		120.4	434.7																10.071								13.428	25.024	54.932
				147.3								281.7	390.3	162.9	324.6	459		226.8		243.9		78.7	255.4																15.259								10.376	15.564	10.986
				92.4								29.1	131.5	463.1	148.5	473		526.4		13.4		18.5	701.6																8.545								53.101	15.259	12.512
				24								159.5	1011.1	63.6	165.9	106.25		545.1		948.9		187.2	561.5																6.714								13.733	15.869	7.324
				54.7								99.4	728.4	534.5	100.6	192.75		484.4		1073		52.3	26.7																23.804								16.479	18.005	10.376
				69.4								176.6	856.4	175.3	1245.8	46.25		144.7		341.3		362.3	98.1																6.409								54.016	10.376	6.409
				74.2								32.5	718	174.8	1456.8	275.25		28.1		1491.1		138.5	63.2																23.193								8.24	13.733	7.324
				150.8								413.6	28.9	484.3	986.8	365.75		28		174.4		42	587.9																17.7								7.935	10.071	19.836
				491								228.5	113.5	502.1	89.8	346.25		689		263.6		35.5	32.2																10.986								18.005	11.597	7.324
				24								162.6	1742.5	198.3	266.7	395.5		1116.1		148.6		54.8	125.4																18.005								14.648	31.128	8.24
				71								89	107	117.8	715.4	214		547.9		261.5		172.1	71.8																22.583								11.902	18.311	6.409
				90.6								94.9	115.9	1138.2	1182	125		492.8		175.1		347.8	76.5																23.499								11.292	24.109	8.85
				146.2								508.2	230.1	357.7	178	1226		139.7		226.6		24.1	435																21.667								11.597	11.902	7.019
				39.1								332.9	997.1	195.5	285.9	807.5		84.3		262.7		75	62.9																8.85								8.24	9.155	6.714
				224.2								65	369.6	902.5	218.8	46		192.2		180.8		45.3	85.8																7.629								8.24	62.866	13.428
				199.6								1179	163	85.8	40.5	90.25		315		53.8		29.3	242.6																6.714								8.545	31.433	12.207
				48.8								170.5	1464.7	535	1210.4	170.5		391.2				135.4	54.1																10.986								13.428	61.646	12.512
				46.4								98.5	767.1	398.3	130.4	81.75		20.8				283.7	106.5																46.387								10.071	21.973	25.635
				126.1								591	389.8	411.9	598.2	245.75		228.3				362.1	266																12.512								11.902	20.142	10.681
				117								395.7	42.5	15.5	92.8	275		131.9				320.7	62																9.766								14.038	17.395	10.986
				478.2								265.9	51.1		289.4	295		178.5				50.8	20.4																6.714								11.292	28.381
				334.6								176.4	688.1		212.8	290		278.1				64.1	64.7																17.395								8.24	17.09
				216.5								779.5	344.6		52.3	87.5		252.9				186.8	732.7																12.817								12.207	18.005
				25.7								159.9	725.5		240.3	993		398.4				1008.1	102.4																13.123								12.817	9.766
				556.3								113	317.7		562.1	643		178.1				97.2	33.3																20.447								29.602	24.719
				23.6								312.5	282.2		1372.6	759.5		338.2				80.6	170.1																12.207								7.935	25.94
				118.5								382.7	730.6		753.6	611.5		931.3				40.1	190																15.869								12.207	9.766
				191.9								371.9	278.4		278.2	432.75		123.2				67.3	273.8																17.395								19.531	10.986
				406.9								302.7	440.6		198	1049.75		42.2				85.5	61.1																27.466								7.629	21.973
				148.5								983.7	55.2		237.2	17		127.8				337.3	208.2																16.479								6.714	9.46
				222.3								2.2	2553.7		76	489.5		204.9				421.4	73.1																12.817								13.123	43.335
				10.8								262.6	246.1		872.9	139.5		1201.7				55.8	475.9																11.292								10.681	28.992
				268.2								414.7	150.6		1198.6	181.5		323.5				183.2	123.8																12.817								13.123	10.986
				110.3								301.6	126.3		767.2	108		163.8				216.5	139.5																7.019								7.935	25.024
				230.4								378.9	110		1779.5	143.75		65.7				365.4	135.5																14.038								6.714	14.648
				29.3								118.2	1728.4		1188.6	156.5		108.4				90.8	298.3																18.311								12.207	19.836
				16.6								723.1	429.5		537.3	899		160.1				312	241.8																21.973								9.46	17.7
				146								314.6	116		826.3	644.25		362.5				90.5	148.9																7.629								6.714	15.259
				133.6								920.9	1316.1		136.4	610.25		334.2				347.6	27																10.376								18.005	12.207
				679								171	762.9		78.7	56.5		209.5				298	481.8																14.648								16.174	16.785
				45								322.9	497.8		269.2	1606.75		229.7				22.7	555.3																11.597								13.123	22.278
				329.5								100.4	349.6		1878.6	299.5		306.1				261.6	120.6																25.94								5.798	16.785
				79								113.5	154.9		407.9	993.25		99.4				247.5	76																19.836								7.324	11.597
				88.7								88.3	502.8		497.3	141.75		95.2				164.8	98.8																13.733								7.324	9.46
				124.4								13.1	333.1		200.4	262.75		333.7				236.6	66.9																23.804								21.057	12.207
				27.5								75.9	103.6		932.2	327.75		304.3				32	114.2																25.024								18.311	12.207
				126.5								276.5	275.6		1130.2	354.75		118.2				661.5	68.3																7.935								19.836	15.564
				130								66.5	84.4		649.9	106.25		190				588.1	144.8																9.155								7.019	14.648
				284.5								608.6	275.3		126.5	793.75		727.1				214.6	174.2																32.043								9.46	17.7
				583.4								105.5	752.7		35.1	416.75		135.2				105.3	255.5																10.986								5.798	9.46
				177.5								349.8	457.7		853.4	229.5		207.9				23.6	25																12.207								10.986	14.648
				83.1								66.1	108.1		321.6	93.25		184.9				330.4	1045.2																16.174								17.7	63.477
				216.4								504.5	203.8		339	310		39.4				66.5	727.3																7.935								6.409	10.071
				78.3								38.9	273.9		82.5	204.25		447.2				109	73.8																12.817								21.667	14.648
				76								198.9	566.8		258.8	87.25		58.8				195.3	293.7																8.545								17.7	22.888
				302.1								61.9	435.8		911.7	85.75		90.1				351.1	70.9																10.681								7.324	20.447
				110.1								5.8	148.7		166.6	90		302.4				392.5	244.9																9.46								24.414	11.597
				114.9								475.6	736.6		348.4	391		221.1				101.4	76.3																32.654								71.716	10.376
				350.3								1.6	305.9		494.6	370.5		153.7				218.1	269.3																24.109								91.858	21.973
				99.9								59.2	317		813.8	111.25		31.6				9.9	59.7																13.733								13.123	9.155
				101.5								34.6	51.2		47	224.5		158.1				67.8	358.7																11.292								11.597	10.986
				209.3								167.3	339		248.5	438.5		127.8				65.1	11.7																10.681								18.005	38.452
				834.4								131.5	215		1794.9	151.75		26.1				509	33																10.986								10.376	15.259
				61.2								747.7	399.3		474.3	402.25		271.1				139	720.6																9.155								11.292	25.024
				205.4								461.8	123		523.8	403.25		172.8				64	65.4																11.902								11.597	17.09
				40.6								297.1	735.5		84.8	671.25		463.5				350	130.7																11.292								13.733	9.766
				100.8								240.9	143.7		143.8	57.75		49.1				284.5	104.6																7.935								7.324	26.245
				652.7								52.4	753.6		460.5	203		55.8				321	16.9																30.518								15.259	13.428
				57.8								69.5	60.1		104.3	254		357.6				164.9	379.8																11.292								11.597	29.297
				139.2								17.7	1228.5		45.4	363.25		121.3				447.2	410.5																15.869								10.376	9.155
				58.8								131.8	58.8		584.7	1228.25		145.9				119.4	174.8																39.673								5.798	14.648
				132								819.8	169.4		242.7	502.25		807.3				213	317.4																7.935								6.104	15.564
				493.1								28.9	38.3		1130	1135.75		122.6				331.8	371.1																20.142								10.681	12.817
				55.8								34.2	179.8		194.8	354		68.5				81.8	73.4																10.376								13.733	10.071
				251.1								39.9	61.3		12.1	271.5		368.6				636.5	12.4																10.376								21.057	14.343
				229.3								903.1	220.5		207.5	95.25		484.9				869.7	32.1																7.629								16.174	11.597
				182.5								18.1			224.4	158.75		259.8				123.7	70.2																13.733								10.376
				666.1								96.9			297.6	205.5		245.3				504.2	209.8																11.292								6.409
				109								379			335.1	432.5		284.6				477.7	15.5																10.681								9.46
				710.3								200			569.8	85.75		43.1				12.6	91.3																13.428								7.935
				404.9								702			150.5	605.75		604.4				16.1	127.2																28.992								8.85
				626.8								131.8			521.1	128.25		307.7				149.4	98.6																13.733								18.311
				247.8								278.2			739.5	78.25		1117.1				580.7	671																6.409								21.667
				52.7								662.9			196.2	117.25		210.3				173.2	56.1																36.621								7.629
				25.4								1031.4			832.3	866.5		192.3				1081.7	51.3																17.395								18.921
				43.9								76.7			215.7	490.25		140.9				190.6	124.8																14.343								19.836
				247.8								11.7			118.1	891		466.2				210.1	132.2																8.24								16.479
				167.9								415.2			301.3	107.25		246.6				417.3	35.8																7.019								9.46
				133.2								630.6			436.9	300.75		48.1				160.7	10.8																21.667								8.545
				255.4								58.8			141.5	591.25		354.7				713.5	344.1																34.18								11.597
				234.7								253.6			177.2	111.75		45.4				282.7	15.7																12.817								20.447
				193.9								70			348.4	238.5		464				14.9	108.3																7.019								10.376
				41.7								85			1149.6	722.5		43.4				118.8	89.9																13.733								27.466
				181.9								399			23.7	283.5		474.4				104.5	105.5																22.278								8.24
				36.6								161.2			301.6	132.25		692.9				676.7	23.4																11.292								18.311
				384.5								135.5			330.1	313.75		319.4				174.7	139.7																26.55								14.343
				334.3								465.2			274.3	103.25		155.8				200.3	144.5																8.85								22.278
				93.2								124.9			440.4	329.25		181.7				77.1	407.7																24.109								23.193
				117.9								42.7			75	721.25		68.3				191.4	93.8																25.94								6.104
				57.2								202.7			674.9	456.25		295.2				152.6	283.1																24.109								13.733
				92.7								50.8			256.2	73		466.4				24.2	29.2																6.714								15.564
				273.2								80.2			940.6	403.25		869.4				380.8	33																15.564								6.409
				152.7								308.9			1005.6	75.75		16.5				336.9	63.5																7.935								8.24
				466.2								34.6			199.8	737.5		214.1				573.4	54.3																15.869								10.681
				110.8								158.8			46.4	699.75		108.3				917.3	197																10.986								15.564
				153.2								485.5			255	59.25		405.8				53.8	52.5																12.512								7.019
				300.9								261.4			40.7	132		311.5				185	191.4																37.231								8.545
				258.7								92.3			647.2	769		73.6				54.7	213.7																14.343								22.583
				82.7								28.4			537.1	207.5		124.1				466.8	140.8																10.071								6.714
				31.6								33.6			263.8	283.5		343.5				650.9	103.4																10.986								10.071
				290.6								111.1			270.2	108		99.1				1057.9	226.6																7.019								15.869
				61.1								487.6			700.2	32.75		111.1				260	107.9																12.817								8.545
				159.9								164.1			254.6	187		77.8				37.4	56.8																14.954								9.46
				106.1								18.3			442.8	48.25		67.6				34	63.5																22.583								6.714
				344.1								64.1			573.5	306.5		33.6				476.9	399.8																6.409								8.545
				341.8								140.2			35.8	122.75		53.4				188.4	74.1																10.376								7.629
				359.9								373.4			61.5	96.25		283.7				433	300.1																12.817								10.376
				62.5								85.8			203.8	17		157				478.2	32.2																9.766								16.174
				141.2								279.7			50.9	360		261.6				189.9	167.3																8.85								19.531
				354.9								743.4			424.7	38.75		74.1				225.3	152.3																15.869								12.512
				278.2								219.7			462	712.5		38.6				1322.3	19.2																10.986								15.869
				49.4								87.2			857.9	52.5		82.4				32.9	131.2																18.005								8.85
				85.3								247			451.5	168.5		214.8				573.2	371.6																12.512								15.259
				161.1								171.5			288.7	262.25		42.3				334.1	29.9																16.785								18.921
				309.2								75			981.4	227.75		126.2				91.1	59																11.597								22.278
				48.2								222			181.7	112.75		49.9				282.3	46.6																19.226								15.564
				91.7								811			420.4	193.5		753.4				84.9	198.5																10.681								15.869
				119.5								16.3			564.7	92.75		269.4				114.2	211.1																12.207								10.071
				327.7								41			753.1	172.25		324.1				570.8	298																8.545								6.409
				57.5								553.9			95.9	32.25		45.1				30.3	144.3																11.597								28.076
				46.3								124.8			586.2	246.75		315.1				858.5	30																7.324								14.343
				313								346			815.7	403		549.6				290.4	109.6																11.597								24.414
				218.8								75.1			332.8	143.75		268.6				916.7	182																18.616								10.071
				61.2								30.1			330.5	267.75		194.5				201.4	165.1																9.155								15.259
				60.1								100.2			1406.7	105.25		16.4				258.6	1139.8																19.226								10.376
				40.2								178.5			157.6	54		124.7				153.8	337.5																27.771								7.629
				247.3								204.5			321.4			273.9				966.4	639.6																18.921								6.714
				205.2								376.2			331.4			266				76.3	204.4																10.071								6.409
				99.1								103.4			250			979.7				500.9	133.1																12.207								7.629
				338.6								15.4			777.9			36.8				355.8	143																14.648								7.019
				277								142.9			220.8			34.4				72.8	126.4																11.597								8.24
				586.3								19.8			41.9			419.8				1036.5	240.1																33.875								13.428
				52.8								166.7			498.5			25.1				112.3	709.9																7.324								7.019
				493.4								155.3			930.6			128.9				150.4	144.2																9.155								22.278
				729.6								175.7			186.6			75.7				246.6	506.2																11.597								18.616
				80.7								107.8			479.1			645.9				1625.9	177.5																7.019								5.798
				52.2								390.5			318.4			45.5				57.6	182.1																12.207								18.311
				124.8								277.4			825.9			512.2				785.5	538.9																10.681								24.109
				418.5								335.8			184			94.8				421.1	153.4																20.752								26.855
				133.8								253.2			149.3			291.1				465.9	64.6																8.545								11.292
				282.7								266.2			193.7			98				49.8	324.9																6.409								13.733
				31.2								134.9			667.2			575.4				228	39.2																16.479								12.512
				107								355.3			818.9			62.7				278.2	67.9																14.954								7.935
				17.2								68			715			233.8				127.1	434.6																11.292								31.128
				19.2								117.1			72.6			72.5				73.9	212.1																6.409								11.902
				23.6								54.2			188.9			30.6				186.8	44																18.005								12.817
				886.5								329.3			808.3			23.8				312.5	124.1																16.174								9.155
				286.2								297.6			46.7			479.4				205.8	134.9																11.292								10.376
				221.7								425.5			135.2			412.4				375	250.1																12.512								9.155
				1328.1								285.7			104.3			42.1				170.1	398.3																16.174								7.629
				345.5								71.7			321.1			109.2				52.1	73																8.545								19.836
				64.5											140.9			159.1				158.4	957.1																8.85
				431.7											1669.9			322.9				25.1	79.1																19.226
				151.2											1067			176.4				27.1	60.7																23.193
				408											212.6			217.1				653.5	351																6.409
				178.5											632.3			437.1				516.4	377.4																6.409
				293											311.5			177.7				768.3	151.8																15.259
				312.8											908.3			317				34.4	8.2																9.155
				321.4											170.2			75.8				346.8	293.4																21.973
				385.7											201.6			794.7				599.1	59.2																10.376
				274											678.7			363.8				18.9	405.3																23.193
				178.7											410.7			60.9				1071.3	235.3																8.85
				300.7											151.2			240.4				19.7	199																6.714
				34.3											96			123.7				675.5	155.3																7.019
				10.1											354.6			432.9				1197.7	194.2																27.466
				154.4											29.9			213.2				46.7	86																7.019
				283.9											146.2			192.6				257.8	77.3																7.324
				46.2											144.2			102.1				266.8	45.1																9.46
				116.2											1720.4			605.7				499.4	60.7																23.804
				76.6											210.9			257.4				1158.9	17.9																9.46
				387.5											137.4			44.7				55.7	80.5																7.019
				923.2											530.8			434.4				314.3	42.7																25.024
				189.8											211.6			246.3				78.1	423.8																19.836
				179.4											399			640.8				16	46.4																9.155
				380.6											154.5			89				835.7	61.7																17.09
				87.3											158			204				59.6	495.5																14.648
				199.7											405.2			20.5				84.9	148.8																14.648
				272.2											163.1			131.5				454.6	399.4																17.09
				217.9											1255.8			364.4				729.2	128.4																13.123
				654.3											460.4			124.8				179.2	146																29.297
				319.7											2700.9			310.6				14.8	546																22.278
				594.3											189.8			83.4				296.3	20.7																11.597
				100.2											122.4			161.3				25.8	44.6																6.714
				50.7											1052.5			653.1				269.5	209.3																7.019
				188.8											520.2			287.8				200.5	88.8																10.376
				47.6											314.8			180.5				1107	13.7																6.409
				362											975.8			26.3				352.9	190.8																19.531
				36.7											924.7			127.1				44.4	64.6																33.569
				157.8											539			523.1				825.1	35.4																21.973
				130.7											975.9			707				755	31.6																28.687
				68.2											1150.5			63.7				740.3	345.3																16.479
				648.8											155.6			53.1				424.7	86.7																6.714
				1068.7											10			34.2				122.3	67.4																6.714
				460.7											125			18.1				331	100.1																21.057
				43.6											106.1			41.5				369.7	9.1																9.46
				233.3											594.6			1039.6				109.4	194.2																17.395
				407.4											97.6			54.3				449.8	53.3																11.902
				138.6											187.5			265.8				28.7	374.2																21.973
				2192.6														63.9				137.6	57.5																13.123
				139.9														305.8				108.8	190.6																6.409
				29.4														300.3				273.3	583.4																19.226
				139.7														75.4				85.6	36.6																16.785
				229.8														132.2				236.6	473																18.616
				47.1														282.1				108.9	317.2																24.109
				188.8														108.4				38.1	106																21.057
				253.2														91.3				204.5	93.9																21.362
				178.5														0				282.3	44.9																14.343
				792.7														41.3				21.6	111.9																20.752
				263.3														75.9				298.1	104.5																20.447
				175.4														0				825.4	37.6																26.55
				26.8														336.3				93.5	188.7																17.7
				116.1														0				826.4	203.9																15.869
				315.1														262				42.6	41																26.55
				657.6														56.1				625.3	822.1																25.94
				74.3														373.4				177.4	67.7																22.888
				707.7														44.8				276	47																20.142
				132.4														241.3				183.1	193.8																25.94
				57.5														534.6				607.3	67.1																7.324
				641.5														363.2				72.6	260.9																22.278
				109.5														463.7				516.4	473.5																29.907
				354.6														302.1				250.5	732.9																12.817
				53.3														120.8				439.6	387.1																30.212
				141.6														44.7				104.2	114																10.376
				132.5														66.5				129.2	284.2																33.264
				201.9														117.7				1918.5	61.7																17.09
				715.2														14				41.1	149.8																19.836
				31.3														362.9				607.2	590.2																14.038
				455.7														608.7				367.9	347																20.752
				71.6														170.6				655.6	75																16.479
				65.2														52				269.7	129.5																6.409
				133.2														80.9				97.7	29.3																10.071
				499.1														211.3				533.7	46.5																19.836
				186.1														143.4				160.1	254.9																7.629
				385.7														580.3				92.6	22.2																16.174
				119.3														538.6				520.4	348.7																23.193
				552														1320.3				190.9	17.2																21.362
				475.6														477.5				135.7	253.7																26.245
				469.5														9.3				410.8	117.6																18.616
				565														785.6				143	334.4																7.935
				101.8														614.1				1684.2	76.7																9.46
				26.5														117				458.4	122.2																15.259
				597														461.9				847.7	24.5																9.766
				50.4														490.2				152.1	49.6																22.278
				209.5														31.4				980.5	202.6																10.986
				663.3														130.1				1071.9	142.6																10.681
				295.6														106.2				409.5	32.5																8.545
				77.6														71				134	424.7																22.888
				166.9														142.5				193.4	338.1																9.155
				823.3														342				871.8	21.2																20.752
				166.4														356.3				448.5	34.5																8.24
				307.8														159.2				1135.8	16.3																10.071
				120.6														137.7				35.3	208.5																23.499
				41.7														1095.9				2605.6	49.9																22.583
				197.8														54.6				262	771.2																7.629
				2183.5														116.3				21.3	155																13.428
				27														41.5				1469.4	126.5																51.575
				614.1														214.1				1612.3	30.9																14.648
				88.3														375.2				396	197.8																10.376
				523														153.7				98.3	41.8																7.324
				16														198.2				152.8	29.5																7.324
				160.7														533.6				438.5	128																9.155
				152.4														738.7				1175.8	94.9																15.869
				217.7														106.8				304.7	777																7.935
				53.7														90.6				996.7	91.2																22.888
				394.7														768.3				1045.6	202.2																7.019
				706.4														531.6				526.1	102.1																10.986
				75.7														534.3				383.8	109.5																9.46
				166.5														157.1				508.1	209.6																26.245
				68.6														567.4				128.1	253																22.888
				83.9														155.2				253.6	130.8																14.954
				42.3														149.4				105.7	38.2																12.512
				250.8														104.7				197.1	72.4																14.954
				469.4														202.3				885.9	141.1																10.376
				40.1														324.8				204.4	140.9																30.823
				689.5														206.9				1292.3	118.4																21.667
				36.3														36.3				1038.7	29.1																8.85
				487.3														140				58.3	134.2																7.935
				473.6														305.1				1183.9	20.3																9.46
				396														376.4				1285.8	24.9																14.038
				71.9														340				642.4	137.7																13.123
				223														1387.8				463.4	516.1																20.142
				205.1														190.8				607.9	90.2																11.597
				117														780.7				2990.1	24.6																22.278
				115.7														291.6				354.7	209.4																25.024
				183.4														128				2690.1	359.4																11.902
				62.6														155.4				453.5	177																43.03
				339.6														338				937.7	636.8																18.005
				337.7														461.6				215.8	28.6																14.954
				180.9														172				560.5	209.9																18.616
				550.3														22.9				907.3	335																10.986
				87.9														40.1					57.2																16.174
				283.6														303.2					155.4																7.935
				440.2														291.5					158.1																13.733
				592.9														249.3					119.1																17.395
				83														82.2					135.6																35.4
				745.3														615					22.4																11.902
				47.1														164.2					210.4																12.817
				25														147.9					19.5																12.207
				62.4														346.2					115.1																17.09
				601.5														317.2					57.9																8.545
				1265.2														58.7					78																10.071
				285.3														85.6					97.7																12.512
				718.2														124.9					48																10.681
				586.8														817					79.3																11.902
				867.2														208.6					548.9																34.79
				242.4														167.6					89.2																13.428
				55.9														237.6					56.2																23.499
				652.6														49.9					25.5																12.817
				70.2														57.3					49.2																15.259
				153.6														660.1					51.8																15.259
				374.6														226.1					33.1																29.907
				30.4														1505.8					357.2																23.193
				99														510.6					311.3																26.55
				134.8														70.1					1086.7																24.414
				73.7														345.3					826.2																7.629
				552.9														351.9					367.1																10.071
				904														143.9					312.6																14.954
				93.1														306.4					57.8																30.823
				147.2														69.3					543.7																29.907
				37.6														67.9					22.2																21.057
				186.7														52.7					210.7																8.85
				412.8														451					52																13.123
				750.5														585.4					176.7																7.324
				99.5														358.9					233.8																7.629
				124.5														42					360.2																25.635
				985.1														208.3					225.8																36.316
				377.5														299.1					70.3																10.681
				15.3														60					111.1																20.142
				132.7														151.4					385.8																9.766
				575.1														170.2					75.5																7.324
				1005.9														670.1					294.3																11.597
				635.4														2.2					22.8																13.428
				338.6														134.4					361.1																11.597
				687														114.6					120.8																16.174
				54.3														1552.7					515.9																29.297
				243.3														144.5					199.5																20.447
				276.3														291.6					115.8																21.973
				388.9														384.9					34.1																31.738
				189														29.2					160.6																17.09
				224.4														339.3					259.4																14.343
				410.9														252.9					94.1																8.85
				114														437.7					454.9																14.343
				244.1														354.2					180.8																22.278
				132.6														188					125.4																7.629
				32.7														645.9					38.6																17.7
				40.9														1.7					386.4																8.85
				93.3														38.6					446.9																25.635
				446.5														584.6					41.8																20.752
				23.6														817.7					189.7																11.902
				661.3														439.2					300.5																7.629
				631.2														29.2					183.3																22.278
				223.1														293.3					89.9																14.648
				215														363.9					436.6																8.85
				149.9														143.1					105																13.123
				361														281.7					64.9																37.537
				279.7														35.8					301.3																18.311
				225.6														696.4					468.4																21.667
				142.9														143.7					158.2																11.292
				548.9														110.2					511.6																16.479
				579.6														262					27.8																12.207
				141.3														229.1					242.8																21.057
				215.9														22.4					230.8																27.771
				601														295					180.2																8.545
				27.4														379.2					563.4																13.123
				240														30.1					43.7																20.752
				25.4														44.7					69.1																14.648
				441.3														172.5					392.7																10.986
				153.4														123.3					80.7																11.292
				33.6														207.8					105.7																18.311
				34.8														761.4					66.2																22.278
				278.6														140.3					482.3																10.986
				640.1														292.5					66.8																7.019
				139.3														48.3					27.6																14.343
				53.5														86.4					59.1																37.231
				162.3														170					224.1																15.869
				86.6														98.5					104.6																19.226
				602.8														47.4					183.7																23.804
				69.2														168.4					117.1																14.648
				293.6														50					202.4																18.616
				254.9														114.6					94.9																26.245
				449.4														248.5					89.4																22.583
				319.5														614.7					60.2																13.428
				760.3														606.2					424.2																13.123
				205.1														555.2					200.3																15.564
				249.4														457.7					66																25.024
				63.6														959.4					45.6																6.409
				286.9														37.8					19.5																8.24
				205.9														462.2					157.6																26.55
				260.7														65.4					75.1																17.7
				46.9														443.7					75.5																7.629
				381.4														356.3					100																8.545
				127.1														116					93.9																15.259
				220.3														2.3					343.4																18.311
				495.3														570.7					304.2																18.616
				444.7														179.2					110.9																39.063
				657.6																			86																18.921
				155.5																			326.4																22.583
				491.6																			16.2																10.071
				91.8																			18																25.94
				1049.9																			25.5																9.766
				329																			732.6																26.245
				108.1																			33.4																16.785
				269.6																			71.6																18.616
				174																			352.4																10.986
				425.9																			51																6.714
				413.3																			243.8																18.616
				25.8																			82.6																18.311
				28.7																			26.7																24.719
				102.5																			149																19.836
				153.6																			150.2																17.395
				82.5																			228.2																38.147
				121																			71.2																19.531
				200.3																			39.9																30.823
				773.9																			145.8																30.823
				474.1																			728.2																43.335
				111.6																			73.7																19.531
				455.4																			310.6																22.888
				918.5																			187.9																11.597
				37.3																			40.5																12.207
																							353.9
																							842.4
																							296.6
																							152.2
																							24.2
																							138.8
																							628.6
																							259.5
																							125.8
																							207.2
																							39.1
																							125.4
																							113.2
																							57.8
																							720.8
																							66.2
																							201.6
																							103.2
																							71.4
																							262.8
																							221.7
																							525.4
																							142.7
																							71.2
																							209.9
																							21.4
																							146.3
																							159
																							202
																							207
																							246.5
																							139.1
																							317.8
																							135.5
																							57.7
																							64.2
																							76.7
																							252.6
																							299.9
																							121
																							541.5
																							137.8
																							176.2
																							71.8
																							60.3
																							267.7
																							209.5
																							172.5
																							70.1
																							104.7
																							143.4
																							27.7
																							417.3
																							228.1
																							280.5
																							208.7
																							247.8
																							153.9
																							64.1
																							489.6
																							219.6
																							11.9
																							22.4
																							260.9
																							17.9
																							455.7
																							267.3
																							37.1
																							32.2
																							423.8
																							30
																							97.9
																							236.2
																							176.1
																							297.4
																							143.5
																							112
																							186.8
																							302.3
																							88
																							231.6
																							72.9
																							0.9
																							31.7
																							42.9
																							73
																							23.2
																							293
																							133.3
																							716.6
																							106
																							58
																							282
																							448.6
																							638.1
																							128.6
																							74.4
																							129.8
																							267.4
																							341.4
																							405.4
																							12.3
																							37.3
																							206.5
																							265.6
																							50.1
																							71.2
																							116.8
																							193.2
																							158
																							286.4
																							94.1
																							170.8
																							52.6
																							221.5
																							119.4
																							436.1
																							384
																							49.4
																							223.5
																							154.2
																							171.5
																							44.6
																							91.1
																							29.5
																							9.6
																							271.6
																							174.3
																							132.9
																							143.9
																							455.1
																							82.1
																							99.8
																							731
																							43.8
																							53.2
																							403.3
																							134.8
																							151
																							145.9
																							82.4
																							239.3
																							131.2
																							107.1
																							76.8
																							353.3
																							500.2
																							34.1
																							58.7
																							424.3
																							345.4
																							1.8
																							416.5
																							95.4
																							175.4
																							175.7
																							173.7
																							78.8
																							711.7
																							137.6
																							48.7
																							345.7
																							49.3
																							273.3
																							184.2
																							94.8
																							260.4
																							284.6
																							567.3
																							397.1
																							655.6
																							245.7
																							162.6
																							44.5
																							51
																							31.9
																							86.6
																							161
																							195.5
																							690.1
																							193.5
																							134.5
																							40.6
																							496.4
																							74.8
																							226.9
																							80.3
																							493.4
																							343.3
																							188
																							24.4
																							764.1
																							149.5
																							123.8
																							72.2
																							350.2
																							283.8
																							251.8
																							142.7
																							250.9
																							150.4
																							13.6
																							254.9
																							243.1
																							93
																							565.1
																							21.3
																							465.5
																							117
																							326.7
																							1.2
																							46.5
																							855.3
																							277.8
																							311.9
																							78.7
																							124.5
																							75.2
																							203.8
																							174.5
																							332.6
																							106.1
																							238.6
																							221.3
																							36.4
																							144.2
																							278.4
																							211.7
																							505.1
																							520.6
																							50.6
																							166.7
																							83.4
																							101.5
																							185.9
																							239.7
																							70.1
																							40.6
																							40.9
																							85.7
																							587
																							168.6
																							45.5
																							72.7
																							580.4
																							34.8
																							21.6
																							51.6
																							458.1
																							158.6
																							287.2
																							27.1
																							343.2
																							269.4
																							44.3
																							100.8
																							553.7
																							32.4
																							360.7
																							77.6
																							93.4
																							23.5
																							64.2
																							391.4
																							78.8
																							176.4
																							102
																							51.4
																							62.1
																							236.9
																							54.3
																							67.1
																							61.7
																							278.3
																							146.1
																							418.3
																							87.4
																							215.4
																							60.8
																							1147.6
																							65.8
																							48.9
																							59.2
																							110
																							166
																							161
																							162.5
																							429.3
																							304.1
																							390.2
																							55.3
																							31.7
																							53
																							52.2
																							35.5
																							38.3
																							577.8
																							450
																							26.1
																							111.1
																							578
																							100.8
																							22.3
																							13.9
																							583.5
																							1.2
																							80.5
																							158.1
																							75.9
																							78.8
																							1420.5
																							174
																							406.4
																							141.1
																							76
																							23.1
																							57.2
																							112.8
																							382.2
																							171.2
																							16.2
																							253.5
																							273.6
																							230.6
																							121.6
																							42.8
																							200.6
																							334
																							336.5
																							300.8
																							450.6
																							47.2
																							223.5
																							13.8
																							118.5
																							104.9
																							159.6
																							134.3
																							63.3
																							107.5
																							160.7
																							48.5
																							91.1
[truncated: 13 more columns]

## Sheet: Figure3-Figure Supplement 1B
Cumulative probability of inter-event interval in the CeA-PKCδ neurons																						mEPSC frequency in the CeA-PKCδ neurons										Cumulative probability of amplitude in the CeA-PKCδ neurons
Individual data showing the inter-event interval (ms) of each cell																						Individual data showing the mEPSC frequency (Hz) of each cell										Individual data showing the amplitude (pA) of each cell
Ctrl								MP															Ctrl			MP						Ctrl								MP
cell 1	cell 2	cell 3	cell 4	cell 5	cell 6	cell 7		cell 1	cell 2	cell 3	cell 4	cell 5	cell 6	cell 7	cell 8	cell 9	cell 10	cell 11	cell 12				cell 1	7.86		cell 1	3.47					cell 1	cell 2	cell 3	cell 4	cell 5	cell 6	cell 7		cell 1	cell 2	cell 3	cell 4	cell 5	cell 6	cell 7	cell 8	cell 9	cell 10
72.9	77	27	122.5	94.1	92.2	49.5		439.8	191.7	42.1	1090.2	18.9	48	1930.7	19.3	294.2	97.8	34.7	379.6				cell 2	3.14		cell 2	4.42					10.376	17.09	8.545	7.019	21.362	10.376	6.714		25.024	8.24	14.648	12.207	12.817	9.766	16.174	8.24	57.678	15.869
227.6	189.8	10.2	419.5	212	115.7	236.5		76.3	370.1	33.2	244.2	74.5	456.1	338.3	764.9	1825.6	655.7	1902	262.7				cell 3	4.53		cell 3	2.16					10.071	7.019	7.019	9.766	13.428	10.071	7.935		6.714	26.55	7.935	9.46	7.629	14.648	23.193	8.24	26.55	33.569
97.4	92.2	32.9	611.5	196.9	209.4	168.7		180.6	172.1	106.9	352.4	23.5	129.6	905.1	74.4	914.9	472.1	3691.9	26.6				cell 4	3.05		cell 4	5.54					19.531	12.817	16.785	33.264	13.733	7.629	10.681		12.512	7.629	8.24	8.24	12.207	9.155	10.071	21.973	17.7	26.55
275.2	91.9	158.5	108.7	168.9	152.4	221.7		417.3	118.6	528.4	316.5	132.5	941.5	394	994	2097	660.5	1592.6	124.4				cell 5	1.8933		cell 5	2.54					18.616	15.259	7.019	22.583	19.531	12.207	8.85		17.09	10.071	25.33	14.954	16.785	38.452	11.292	8.24	12.207	16.174
195.4	44.6	19.4	439	145.8	132.3	450		71.1	346.4	283	212.4	188.9	119.3	823.4	116.9	3536.5	707	1395.5	265.5				cell 6	6.64		cell 6	2.32667					10.376	7.935	7.324	8.85	8.24	16.174	9.155		32.654	13.733	21.057	8.545	8.85	8.85	10.681	14.038	12.512	14.954
130.1	90.8	29.1	81.8	373.3	142.3	70.8		133.9	1237.4	342	470.6	334.4	90.4	374.4	311.4	5650.9	63.5	671.7	1475.8				cell 7	6.3		cell 7	1.17667					47.913	14.038	10.071	7.935	14.038	8.545	10.986		22.583	11.292	20.752	9.155	9.46	14.038	13.123	21.973	21.973	18.005
182.9	53.2	61.3	78.6	106.6	63.3	157.3		264.9	435	267.1	43	25.3	577.3	1349.7	90.4	655.2	50.1	17	968							cell 8	2.06333					16.785	8.24	13.123	9.46	8.85	10.376	14.038		6.409	14.343	9.46	8.85	8.85	12.207	9.766	18.921	9.155	15.564
189.1	136.4	702.2	110.4	37.2	111.9	847.4		56	1543.2	988.1	404.6	149.8	89.8	133.7	313.1	212.4	163.4	3276.8	290.9							cell 9	2.23333					37.537	7.019	10.376	19.226	10.071	8.24	8.85		6.409	19.226	22.278	12.817	8.85	16.174	9.766	10.681	9.155	16.174
39.7	929	90.5	422.5	43.2	218.8	878.6		314.7	40.7	435.5	638.5	237	532.4	1133.9	1482.7	279.2	78.8	1589.3	67							cell 10	2.20333					18.616	7.629	9.766	21.667	8.85	8.24	9.766		10.376	9.155	7.629	7.324	11.292	32.654	10.376	10.376	9.46	20.142
67.9	551.1	173.6	124.7	472.1	42.1	1116		606.6	2003.8	770.3	27.4	254	607.7	22.5	639.3	790.2	1525.8	1280.3	290.1							cell 11	0.43					9.46	16.785	11.902	7.019	14.648	7.935	10.681		8.85	10.681	7.629	12.207	16.174	10.071	10.376	8.24	11.902	14.648
146.9	349.5	208.4	184.9	259.9	520.9	133		184.4	899.9	439.3	228	317.7	48.3	624.4	1027.2	1174.9	86.9	7606.3	105.7							cell 12	2.91333					10.376	16.785	14.648	14.954	8.24	8.85	6.714		6.714	12.817	7.629	8.24	9.766	8.85	14.038	10.376	14.648	14.648
12.2	267.4	123.8	55.3	48.9	18.6	24.1		74.7	76.9	423.7	22.8	51	619	259	255.5	1750.6	424.9	1633.6	97.7													18.005	15.564	68.054	12.512	8.545	10.071	10.071		7.935	8.85	10.681	9.46	7.629	17.395	13.123	30.823	9.155	19.531
115.7	14.3	81.2	224.9	510.2	363.7	2245.7		213.4	596.4	1819.1	848.7	71.8	201.6	483.1	501.4	246.3	101.6	321.6	870.9													9.46	8.545	10.681	11.902	10.986	24.719	8.24		6.409	10.376	11.597	7.629	15.259	9.155	15.564	7.935	39.368	12.512
140	118.6	58.1	243.8	1489.1	83.1	1421.4		665.7	406.7	822.5	155	221.9	1109.8	1046.8	378.7	107.8	1131.2	2966.4	507.9													12.817	14.648	31.433	11.597	9.766	7.629	7.019		25.635	7.629	8.24	10.681	30.212	15.259	12.207	15.869	8.85	18.616
27.5	16	40.8	147.9	538.9	533.7	38.2		257.7	519.3	171.5	51.3	113	806.5	410.5	613.9	3398.7	73.5	3044.6	278.6													29.297	8.85	7.935	16.479	10.376	12.207	9.155		7.935	10.986	10.071	10.986	18.616	22.583	10.986	10.681	11.902	16.479
345.7	106.6	138.4	128	70.5	491.2	42.6		132.9	14.5	727	104.8	63.4	572.2	486	68.4	1464.3	59.3	526.3	244.6													11.597	13.428	12.512	9.766	26.855	17.09	6.714		6.104	10.376	11.597	7.935	30.518	14.343	11.292	10.986	11.292	14.343
359.3	376.6	45.2	25.7	216.7	74.3	1020.7		566.2	687.8	577.8	825.2	26.2	395.9	1025	349.5	262.3	162	364.4	875.5													12.512	12.817	7.629	11.597	7.324	28.687	18.311		23.193	14.648	7.935	7.629	18.921	21.362	13.123	11.597	10.376	14.954
218.1	814.7	61.9	111.3	97.3	359.4	2258.7		20.6	66	190	226.3	48.3	1413.5	311	194.8	919.1	199.9	29.9	146.1													15.259	17.7	14.343	7.935	24.719	50.659	21.973		7.324	10.376	8.24	19.226	7.324	14.038	11.902	7.935	9.46	19.836
114.9	293.6	67.7	273.8	37.9	267.6	464.6		146.7	816	1028.1	190.2	54.6	1898.4	455.3	327.3	2254.9	1311.7	975.8	160.5													11.597	11.902	10.376	10.071	13.123	25.635	8.24		7.935	15.869	11.902	9.46	15.869	7.324	13.428	22.278	23.499	18.311
376.8	251.7	108.7	306.9	2.9	36.4	289.7		224.8	327.4	462.4	65.9	26.9	879.6	306.1	142.3	88.2	54.9	1619.1	137.8													22.888	25.635	11.597	7.019	20.752	8.24	9.766		7.324	12.512	10.681	13.428	35.4	14.648	12.817	10.376	10.376	16.174
127.3	23.2	297.9	242.6	174.7	125.9	114.8		557.3	1191.1	309.3	149.9	95.4	120	3965.3	1284.7	4230	621.1	1687.3	168.2													9.766	12.207	8.24	6.714	21.362	7.935	9.766		24.719	13.733	9.155	7.629	11.292	16.785	9.766	9.766	8.85	25.024
126.2	457	28.4	74.4	358.1	110.6	170.7		113.2	477.8	96.3	759.5	181.7	68.3	112.8	465.4	1171.9	1007.7	1393.3	98.3													22.888	18.616	7.324	10.376	9.155	16.174	7.629		7.935	9.46	10.681	9.46	33.875	17.09	21.057	10.986	11.292	13.733
43.4	126.7	34.4	311.1	127	35.1	299.3		68.8	811.9	243.3	224.7	162.8	217.3	167.1	65.6	964.4	333.2	257.9	200.1													14.038	10.071	12.817	11.597	15.259	22.278	13.428		7.935	20.142	21.667	12.207	13.428	8.545	10.376	13.733	10.986	25.94
210.2	63	15.7	52.6	154.2	272.8	1092.1		143.2	115.7	77.5	125.3	460.4	681.3	827.6	461	972.1	227.9	526	192.4													27.771	8.24	13.123	16.174	9.766	7.935	10.986		7.019	13.123	8.545	8.545	16.785	13.428	22.888	12.817	9.46	38.147
18	670.9	32.9	655.2	124.8	186.2	2066.7		370.8	1051.6	167.2	36.4	183.3	331.1	419.1	122.4	133.9	315.4	4635.1	243.3													53.101	7.935	14.648	12.817	25.94	7.935	12.817		11.292	8.545	12.207	15.564	8.545	7.019	27.161	11.597	11.597	19.226
149.9	730.3	106	213.4	177	207.6	935.8		319.5	699.8	98	619.3	105.2	96.4	763.3	365.4	2002.6	46.5	1852.7	344													15.564	7.324	36.011	10.986	9.766	7.324	9.46		12.207	7.935	8.545	8.85	7.324	16.785	10.986	23.804	18.921	20.752
50.9	314.5	283.4	197.6	21.7	60.8	284.8		750.3	30.2	55	155.7	427.4	183.7	332.6	45.4	106.9	45.8	355.3	180.7													24.109	7.629	18.921	21.973	17.09	8.85	9.46		24.109	17.395	7.935	8.545	11.292	13.733	18.616	8.85	14.343	13.428
99.4	42.1	158.7	75.9	148.3	290.3	16.2		460.9	197.5	84	60.9	316.1	713.9	1312	296.4	967.1	274.2	2279.7	220													25.635	6.714	11.597	12.817	7.629	7.935	21.973		14.954	7.324	10.071	12.207	8.85	9.766	11.597	15.564	8.85	17.09
52.4	969.8	514.3	462.9	246.3	113.1	237.7		111.6	664.6	136.8	500.4	140.6	157.2	301.9	306.5	295.7	366.8	544.9	190.8													14.038	8.85	16.479	9.46	30.823	11.597	10.071		8.24	9.766	13.733	9.766	17.7	12.207	10.986	10.986	11.597	12.817
134.9	44.8	62.1	38.3	857.5	23.7	146.8		216.9	1666.8	70.6	129.2	255.3	451.5	990.1	69.5	250.4	335.6	3307.8	573.6													20.447	11.902	19.226	13.123	8.545	13.733	13.733		6.409	7.935	12.512	10.376	24.414	10.376	11.292	12.207	10.986	14.038
197.6	265.9	30	32	152.1	109.8	20.2		391.8	784	363.3	20.7	177.8	263.1	1644.6	309.4	1722.2	529.4	4628.5	156.1													10.681	7.019	20.752	14.954	7.629	7.324	14.038		6.104	10.071	14.343	7.629	7.019	22.278	13.733	18.921	16.785	17.395
114.4	116.8	36	61.3	232.8	106.8	334.1		43.6	54.9	76.5	261.6	150.9	937.4	338.5	460.5	634.7	632.2	3202.7	852													14.954	11.292	23.804	12.817	8.545	8.545	45.166		14.343	13.428	8.24	7.935	17.395	13.733	13.733	9.155	10.986	18.616
6.5	730.9	87.5	138.1	85.5	49.8	2309.1		427.8	464.5	570	128.3	31.5	1015.8	159.5	78.9	520.2	120.2	4093.3	122.2													11.292	7.629	6.714	7.629	19.226	9.155	6.714		6.714	19.226	8.545	10.986	14.954	9.46	12.207	8.85	10.986	16.479
361.5	977.1	101.4	106.9	44.2	371.2	695.5		93.1	528.1	673.4	168	0	226.4	68.8	186.6	714.2	106	129.7	82.8													21.667	10.071	7.935	16.785	5.798	7.324	12.207		6.714	17.395	8.85	8.24	14.954	18.005	20.447	19.226	15.869	24.109
312.6	71.2	24.9	175.6	665	497.8	61.2		250.2	521.6	277.8	175	144.5	370.9	30.5	614	478.7	811.4	2862.2	256.7													12.512	17.395	60.425	12.512	7.324	19.226	6.714		13.733	10.376	11.292	7.629	17.7	8.545	28.992	9.155	12.207	13.733
44.2	64.6	94.8	76.1	220.6	420.6	59.6		394.4	776.9	161.8	124.9	36.4	160.7	658.5	814.3	843.5	46.4	2346	205.9													30.823	17.395	12.207	9.46	36.316	24.414	6.714		22.583	9.155	21.362	7.324	7.019	45.776	17.7	12.512	21.973	17.09
223.9	113.6	79.3	19.1	126.5	154.2	379		124.1	70.8	215.7	142.4	56.3	529.6	374.7	394.5	603.1	608.4	406.8	39													11.292	8.24	15.259	18.311	11.292	12.207	11.902		12.512	8.545	8.24	9.46	15.259	21.362	18.616	11.902	18.921	12.512
147.8	123.3	31.7	311.5	43.4	45.6	825		147.9	125.8	17.2	38.4	60.7	284	1145.3	661.4	1669.9	508.4	9409.5	727.5													13.123	10.681	11.597	10.071	14.038	22.888	12.512		7.629	15.869	23.499	7.935	14.343	11.292	10.376	15.259	14.648	25.635
32.6	130.4	83.6	38.2	762.6	145.3	625.1		506.4	195.7	81.6	1296.2	78.8	847.2	984	56.9	394.6	340.9	2541.2	72.1													18.005	18.005	30.518	6.714	15.259	10.071	10.376		14.648	18.005	24.414	12.512	8.85	31.738	10.986	10.986	9.46	25.635
8.3	53.5	130.4	155.7	144.1	191.9	646.9		306.4	152.3	615.2	179.8	169.4	745.7	1180	700.7	39	98.2	3055.5	29.1													17.7	15.869	16.174	18.616	47.302	8.545	11.902		7.629	9.155	8.24	8.545	15.564	18.005	10.071	7.935	9.46	12.817
60.3	101.1	20.6	140.5	283.6	50.7	194.6		119.7	1571.2	83.3	90.2	155.1	827.2	1432.8	1327.9	426.3	1246.8	1322	72.1													16.785	9.155	9.155	13.428	6.104	17.7	10.986		6.104	12.207	8.24	7.324	22.888	7.629	11.597	8.24	13.733	17.7
144.5	813.3	20.4	308.2	30.7	21.4	250.3		482.8	475.8	44.5	82.9	61.1	153	148	149.9	2988.2	651	117	267.2													22.888	16.479	25.33	16.479	32.654	10.071	8.85		8.545	11.902	8.85	8.24	15.564	17.395	19.226	8.85	21.057	12.817
136.7	535.1	326.2	64.6	1147.7	27.1	305.7		72.2	758.6	736	91.3	73	52.7	2064.9	106.9	1176.2	159.1	573	784													10.681	13.733	11.597	21.973	16.479	15.259	17.395		14.038	11.597	13.733	9.155	10.681	55.847	16.785	23.499	10.071	18.311
83.6	501.2	183.4	74.8	46.2	103.1	419.9		269.3	708.1	609.3	56.6	261.1	67.5	1013.8	1064.5	186.5	235.2	6255.4	116.1													22.888	9.766	40.283	36.621	16.785	21.057	11.902		8.24	7.935	11.597	10.376	9.46	10.986	14.038	15.259	9.46	15.869
33.1	107.9	41.7	46.4	94.5	635.8	609.1		294.8	302.6	717.8	90	179.7	86.6	1706.9	248.5	441.4	840.5	3182.2	110.4													10.376	8.24	14.954	25.33	15.869	14.954	10.986		9.155	17.09	11.597	8.545	32.959	19.836	10.681	8.545	8.85	12.512
81.9	107.5	75.3	185.2	51.7	266	245.4		200.3	696.3	461.4	461.5	120.1	0	2236.7	565.9	1334.1	105.8	2225.3	99													13.733	7.629	8.545	9.46	15.564	13.123	15.564		9.766	7.324	11.902	13.123	13.428	19.836	10.986	11.597	8.85	15.869
62.5	14.7	323.4	106	61.1	97.6	251.8		176.7	194.9	689.7	345.5	61.5	94.5	1540.6	40.1	75.4	65.7	1060.5	572.5													10.986	7.324	9.766	14.954	10.681	16.479	7.324		8.24	7.324	11.597	7.324	16.174	35.095	26.245	7.935	21.973	19.226
124.2	102	157.3	129.5	125	570	216.2		52.1	58.2	169.6	58.3	232.7	108.7	889.6	122.8	230.3	929.1	2962.6	390.6													13.733	12.512	7.629	13.428	8.545	12.207	9.155		7.629	11.292	8.85	8.85	8.85	19.531	15.869	22.583	10.986	21.057
22.5	272.1	70.2	177.7	170	40.2	149.7		142.3	195.1	370.1	233.4	243.4	108.2	759.8	512.9	471.6	1157.3	511.8	432													19.226	11.902	13.428	11.597	8.85	7.629	6.714		20.752	7.324	13.733	7.324	7.935	18.921	10.071	8.85	9.766	21.057
86	104.1	39.3	218.4	48	530	511.9		24.5	290.4	1848.6	170.3	152.6	74.8	296.6	151.7	1732	43.1	2162.7	52.3													14.038	16.174	16.785	8.24	13.428	24.109	7.935		8.545	13.733	8.24	7.324	14.343	13.123	17.09	15.259	11.292	12.512
100.9	181.1	348.6	51.7	205.3	106.8	122.6		374.3	67.2	1190.7	174.6	108.3	1591.6	767.7	65.4	1016.2	137	4111.2	148.3													12.512	10.681	22.278	28.687	28.687	11.597	8.24		15.564	16.479	11.902	7.324	15.259	10.681	12.817	15.564	11.292	25.024
9.9	503.5	99.6	191.6	592.6	784.7	25.7		599.6	363.1	766.3	88.9	115.7	726.4	834.6	1911.5	586.3	383.7	2581.3	250.9													11.597	28.381	10.071	10.376	6.714	7.324	13.123		17.09	8.545	10.986	12.207	8.24	15.259	12.512	8.85	11.902	18.921
24.1	214.5	438.7	72	19.7	542.8	55.2		266.9	29.2	42	701	20.7	265.9	24.1	823.2	159.9	1668.2	1983.2	429.6													15.259	10.986	9.155	10.376	7.935	11.902	9.155		14.648	9.766	9.155	9.46	8.545	30.823	14.343	10.681	11.902	14.954
125.4	35.9	71.7	67.5	154.4	180.9	120.2		845.9	520.6	218.5	164.3	292.6	108.9	622.8	1032	221.5	43	199.4	130.7													15.564	19.226	15.564	10.681	13.733	7.935	18.616		7.324	16.785	7.629	7.935	16.785	13.428	14.343	21.667	13.123	32.959
379.7	185.6	59.4	307.7	694.9	87.8	1306.7		476.8	54.2	151.8	50.3	298.5	548.7	290.3	196.8	1216.5	487.3	239.4	118.1													15.259	13.733	7.935	13.733	15.869	10.986	10.376		6.104	9.155	8.24	10.071	18.005	20.447	13.733	15.869	11.902	13.733
83.9	593.2	17.1	76.4	186.4	96.8	56.7		36.7	1383.3	813.2	290.5	134.5	272.7	379.2	156.3	678	180.2	2704.4	48.5													25.635	14.343	33.569	11.902	10.681	23.499	7.935		10.071	8.24	13.733	8.24	8.24	21.667	10.681	27.161	15.564	12.817
24.1	105.4	440.4	548.7	86.4	476.3	854.5		373.3	1177.1	599.4	89.4	111.7	129.9	914.9	137.5	1204	577.3	2706.4	1432.8													10.986	10.986	12.817	14.038	7.324	7.324	16.174		7.629	13.428	7.935	10.376	9.46	8.85	13.123	11.902	22.583	14.343
144.1	128.9	228.1	535.4	183.7	321.5	278.9		32	365.6	639.9	69.3	122.7	391.5	240.4	1212.4	221.2	259.3	1753.8	122.4													13.428	7.629	13.428	8.85	6.409	13.428	9.766		10.986	17.395	14.038	10.681	7.019	11.902	18.005	8.545	16.785	43.945
13.5	137.9	520.4	86.5	95.7	14.7	152.8		457.3	594.4	120.6	1144.1	94.5	1067.5	570.5	97.8	1255	701.4	692.2	1057.5													10.986	18.616	21.057	8.545	11.902	7.629	7.019		10.071	8.85	10.376	13.733	20.447	9.766	15.869	15.259	11.292	12.817
43.8	281.4	253.9	327.8	365.7	102.6	2239		420.1	384.3	175.9	180	53.1	898	336.7	510.1	1029	747.3	3919.9	533.6													10.376	6.714	8.85	16.174	14.343	12.512	8.85		9.46	8.85	7.629	8.24	7.629	23.193	20.447	34.485	11.597	20.752
200.3	363.7	77.5	372.6	476.6	97.5	100.3		124.2	179.9	350.2	280.4	205	965.3	422.9	89.4	1085.5	330.2	122.3	499.8													12.207	10.376	8.545	13.428	7.629	18.921	11.597		26.245	18.616	14.343	15.259	8.545	9.766	17.395	8.85	16.174	16.174
47.7	235.3	221	30.8	245.9	111.5	586.9		105.3	329.7	33.6	749	122.9	121.3	241.8	862.7	592.3	329.8	1827.6	313.1													22.888	16.479	8.85	21.973	9.155	7.935	7.324		13.733	10.681	9.766	8.85	10.681	9.46	26.245	17.395	11.902	16.174
44.1	654.7	178.1	286.1	46.7	25.7	246.3		112.1	1163.6	310.4	721.3	268.8	108	285.4	928.8	238.3	81.6	973	1094.1													10.681	9.46	25.635	14.343	7.019	7.935	7.629		18.616	7.629	12.817	9.766	13.733	8.85	10.376	36.316	13.428	20.142
21.6	187.8	31.4	416.1	72.2	70.6	467.2		86.3	509.3	761.1	61.7	456.3	31.4	830.4	304.9	539.7	23.6	4860.4	39.8													37.842	8.24	17.7	20.752	8.85	8.85	14.648		26.855	13.123	13.733	7.935	10.681	30.823	14.343	10.071	16.174	14.038
100.6	689.5	92.5	52.9	202.9	177.4	283.7		70.2	483.3	250.6	475.2	180.1	94.5	2036.3	484.1	401.2	934.3	2060.1	375.5													39.673	20.447	17.7	14.038	15.869	7.324	8.545		9.46	10.071	12.512	7.324	17.09	10.376	11.292	11.292	9.46	17.395
93.8	190.3	334.8	115.8	318.3	941.1	1339.9		62.6	352.8	114.7	560.9	143.7	1793.5	922.1	531.8	1532.9	233.1	6886.7	495.1													10.071	11.292	15.869	14.038	9.766	7.324	17.395		6.104	10.986	26.55	11.597	15.259	12.512	26.55	13.123	10.986	18.616
104	44.1	643.9	91.7	402.9	315.1	161.1		198.6	302.4	125.5	92.9	126.1	144.3	124.4	852.5	2012.3	233.2	519.9	604.4													13.428	17.09	27.161	7.019	13.733	7.324	7.629		8.24	8.545	10.071	9.766	12.207	32.043	10.071	15.259	10.986	13.733
215.3	271.9	23.9	330.7	18.8	52.6	1256.6		259.8	65.6	1147.4	249	164.7	452	1279.8	396.7	1012.3	77	382.3	1014.5													26.55	10.986	9.766	19.531	10.986	10.071	8.85		7.324	11.902	7.629	8.85	14.648	12.817	10.681	10.986	10.071	17.395
76.5	68.9	439.4	45.4	17.1	57.3	26		436	272.5	117.5	174.7	70.5	317.1	865.1	106.5	797.1	73.1	2003.5	117													16.479	12.207	8.24	6.714	5.798	9.766	7.629		7.324	14.343	10.681	7.935	7.019	22.278	11.292	11.292	18.311	13.428
245.5	380.5	7.2	86.6	274.6	536.2	434.4		90.9	190.4	45.2	67.7	333.7	264.4	45.9	150.4	71.9	1357.5	1267.6	28.9													21.973	8.24	19.836	17.09	10.071	17.395	14.648		7.324	8.545	14.954	9.766	9.46	19.836	10.376	8.24	8.85	16.174
72.4	26.4	17.6	115	185.2	323.4	73.8		259.1	783.9	258.5	201.4	48.4	49.8	2878.2	574.8	605.5	112.8	2620.3	623.8													14.343	15.259	7.019	7.935	8.85	8.24	14.038		8.545	10.986	9.46	17.09	7.935	8.24	11.292	14.648	14.038	12.512
217.9	307.9	37.3	36	246.5	77.1	580.7		227.9	33.8	789.2	493.5	104.9	871.7	1351.1	229.9	712.5	1547	973.2	15.8													18.005	9.155	13.428	34.485	7.324	7.324	26.245		6.714	9.46	8.24	8.545	11.902	21.973	27.466	14.954	19.226	13.428
37.2	64.3	110.1	33.6	247	51.2	1528.1		1.3	87.7	240.7	619.4	332.4	328.3	280.5	1491.1	1437.3	193	4802.7	35.2													11.597	11.597	18.921	16.479	10.986	10.986	21.667		13.428	8.85	13.733	9.155	14.343	15.564	9.766	11.902	13.428	17.09
430.3	257.7	91.9	58.1	64.8	155.8	240.2		58	153.7	76.9	66.3	549.9	44.4	765.2	143.1	288.3	21.5	144.8	1070.7													13.123	7.324	7.629	16.479	29.602	7.935	10.376		6.714	18.616	10.681	10.376	16.479	13.733	11.902	28.076	9.46	29.907
184.1	223.8	72	0	225.3	226	298.8		97.7	1361.4	472.2	219.3	288.7	20	284.8	389.2	207.3	808.1	5421.8	418.4													10.376	18.005	13.733	16.479	25.94	13.428	23.499		28.076	19.531	10.376	7.935	20.142	13.123	11.597	14.343	12.512	14.648
207.6	473.8	34.3	279.6	226.1	150.8	28		64	362.7	351.5	189.1	162.4	121.6	1287.3	136	2030.9	361.3	1323.8	1228.8													13.123	13.428	9.46	10.071	13.733	13.428	7.324		10.376	14.343	7.629	10.376	10.071	23.804	10.986	8.24	16.174	17.7
25.9	27	34.9	209.2	70.5	402.4	512.1		175.8	2845.2	357.8	63	196.6	104.8	400.3	74.4	45	178.8	3332.9	263.3													10.986	16.785	12.512	12.207	5.798	17.09	10.376		13.733	14.343	9.155	8.545	12.512	12.512	16.174	9.155	9.766	14.038
415.8	34.4	72.6	44.6	172.1	186.3	58.6		243.5	381.5	926	214.9	99.7	54	832	31.7	296.2	294.6	879	158.2													16.785	16.174	7.935	28.992	13.123	14.038	8.545		7.019	8.85	10.071	7.935	8.545	9.46	17.395	20.752	19.836	22.583
168	431.3	382.9	258.2	307.5	453.8	81.8		63.3	73.9	30	194.8	481.3	131.6	745.7	439.8	2477.5	888.5	1766	521.5													14.954	14.648	22.278	10.376	7.324	9.766	14.648		8.85	8.24	8.24	9.46	14.343	22.278	10.376	10.071	10.071	18.005
357.7	13.1	119	151.9	54.4	351.5	267.2		75.1	689.8	110.6	165.1	138.3	15.8	261.8	534.7	1165.7	982.5	3309.8	318.3													12.207	8.24	88.501	6.714	6.714	7.935	11.597		7.019	18.616	17.7	12.512	7.629	19.226	10.071	18.921	9.766	15.259
75.4	118.4	263.3	14.7	53.5	33.6	166.1		117.4	193.1	1260.8	52.4	35	137.7	957.6	2179.6	1992.1	124.6	620.6	161.9													10.681	10.071	6.714	14.038	11.597	9.766	15.259		7.629	7.935	8.545	10.071	10.071	18.616	20.142	11.597	12.817	15.869
17.9	89.8	36.1	34.5	65.9	64.5	661.2		12.3	162.1	341.5	281.1	40.2	574.3	160.2	284.1	3812.3	743.4	235.3	26.9													32.043	7.935	19.531	9.155	16.785	9.46	6.714		7.629	7.935	14.038	7.629	13.733	19.531	10.376	16.479	18.311	16.479
504.1	65	100.6	81.8	158.1	822.3	511		83.3	20.8	306.4	122.6	80.4	511	215.6	40.6	486.3	1691.2	1301.3	270.9													11.292	12.817	17.395	16.174	5.493	8.24	8.24		6.104	10.986	13.428	8.24	27.466	16.174	31.128	9.766	17.395	13.123
53.4	94.1	22.8	141.9	224.3	149	48.9		36.2	1872.1	1467.7	413.1	453.5	76.7	44.1	316	30.4	134.6	436.4	51.4													11.902	11.902	31.433	9.155	9.46	22.888	10.376		7.629	17.09	8.24	10.071	13.733	27.466	22.888	8.545	14.343	12.512
21.7	45.3	60.1	20.8	418.6	230.7	359.8		232	14.3	767	459	240.2	156.7	637.7	703.4	285.6	411.2	1147.8	431.8													16.174	7.629	9.46	14.343	11.292	11.292	9.766		14.038	9.766	11.597	14.038	15.564	18.616	10.986	9.766	10.681	18.311
335.9	15	21.5	28.3	59.6	50.1	418.3		167.4	33.7	142.9	448.2	259.6	419.7	668.7	265.2	341.8	151.5	2275.3	62.1													10.071	8.24	15.259	7.324	6.409	11.597	9.46		22.583	15.259	15.259	14.954	31.433	17.09	16.479	20.142	13.733	13.123
89.7	122.8	61.8	234.4	67.1	189.3	536.4		41.6	22.7	754.8	29.8	36.5	233.7	731.9	441.9	689.1	394.1	489.1	249													49.133	17.7	8.545	7.935	13.733	9.766	12.207		6.714	13.733	7.935	8.545	7.019	13.428	10.071	11.902	52.795	13.733
71.6	67	48.8	73.4	182	29.4	954.6		156.9	1234.9	187.2	663.4	59.6	20.3	439.3	168.7	3122.5	469.7	1122.3	281.2													9.46	14.038	36.316	10.071	13.733	10.681	16.479		25.94	7.324	13.733	8.85	9.766	7.019	13.428	26.55	15.869	14.648
26.2	369.7	269.2	202.7	21.4	325.2	686.7		328.7	34.2	194.1	87.4	277.1	496.9	819.4	207.2	94.2	104.3	4665.1	135													31.128	11.902	12.817	10.071	14.343	9.766	10.681		19.836	9.46	14.648	8.85	20.142	21.362	37.537	23.499	14.038	36.621
132.7	335.2	109.1	435.1	30	15	355.8		97.6	36.8	78.7	76	81.2	587	65.1	651.2	718.3	1796.3	5193.2	689.6													13.123	9.766	11.597	9.155	7.019	9.155	8.545		7.019	14.038	9.46	10.986	18.005	8.24	16.479	8.545	41.504	31.738
22.9	37.8	236.5	47.9	19.4	360.9	125.5		562.1	47.9	436.5	465.7	227	222.6	295.2	176.2	2183.9	83.6	3326.7	17													30.518	19.836	21.667	21.667	8.24	7.324	7.935		9.46	11.292	8.85	8.85	9.155	20.142	17.7	14.648	20.752	14.954
141.6	288.5	77.3	35.4	220.4	137.7	1264.2		133.7	57.3	799.4	102	22.9	246	81.2	40.1	1261.9	1066.7	393.7	344.7													21.667	12.817	49.133	15.564	13.123	7.324	7.935		23.193	8.24	11.597	11.902	11.292	14.038	27.161	8.545	22.278	17.09
34.8	321.6	230.1	636.7	79.3	470.8	41.2		178.2	741.8	12	340.6	529.4	200.1	1695.7	27.4	2697.9	26.6	738.8	1018.6													11.597	14.648	14.343	11.292	17.09	13.428	15.259		11.292	8.545	10.986	7.324	11.292	13.733	11.597	17.395	16.785	19.836
16.3	242.4	65.8	768.7	160.6	658.1	460.4		85	180.7	45.9	313	224.4	78.9	1930.6	218.7	1067.8	626	240.1	204.7													10.986	8.85	11.902	10.071	7.019	7.629	7.629		17.395	10.071	8.545	7.629	11.597	7.324	12.207	16.785	9.155	45.776
74.6	140.1	480.7	88.9	80.8	1061	57.9		236.5	123.1	70.6	169.6	493.4	96.1	427.2	227.3	503.5	443.3	1795.4	1310.8													10.681	15.564	13.428	8.545	15.564	11.292	9.46		7.324	11.292	8.85	9.46	11.902	15.869	25.024	25.33	13.123	20.752
94	562.6	514.2	212.8	161.1	367.2	725.9		172.7	18.3	79.2	495.8	25	323.8	868.8	794.4	572	658.6	1299.4	511.5													33.264	6.714	40.588	13.123	11.902	9.766	15.259		7.324	10.071	7.935	13.123	10.376	28.687	10.986	8.24	16.479	15.259
20.4	196.2	89.2	256.4	61.6	531.8	1834.5		551.4	137.6	431.4	632.4	123.3	719.1	1594.6	154.7	158.3	217.1	5664.2	820.7													9.766	10.681	8.545	6.714	7.324	8.85	12.512		6.409	9.46	20.752	8.545	7.935	25.94	10.376	13.733	43.335	13.123
331.6	616.3	124.9	369.5	158.8	865.8	315.1		55.8	850.1	47.6	1147.4	74.1	267.3	671.1	340	37.6	268.6	1176	369.4													28.992	14.648	17.09	17.395	6.714	24.414	8.85		7.324	8.24	8.85	8.545	17.09	7.019	14.343	15.869	8.85	18.005
258.5	25.7	15.5	216.8	51.6	1137	19.4		371.8	870.5	130.8	612.8	198.9	1326.9	510.6	138.8	707.2	35.5	2158.1	62.7													9.766	9.766	14.038	23.499	9.155	13.733	34.79		8.24	14.954	8.545	11.902	11.902	12.817	13.428	11.597	9.46	34.79
32.1	24.7	71	137.1	132.1	366.6	542.9		99.5	368.6	662.7	96.1	141	65.1	327.1	968.2	1463.9	875.4	267.4	494.9													29.602	8.545	18.005	11.902	5.493	8.24	7.324		8.85	8.545	8.24	8.24	11.292	27.161	9.766	27.161	9.46	28.687
150.8	219	279.8	305	127.5	446.9	1175.1		198.2	174.7	447.8	147.7	574.1	134.3	1489	733.6	279.7	338.1	102.1	66													11.597	18.616	67.749	14.954	7.019	8.545	7.629		7.324	7.324	7.935	10.681	11.597	12.817	10.681	9.766	10.986	14.343
252.1	32.9	119.7	127.8	132.3	157.7	67.7		200.8	354	202.4	167.6	440.8	289.2	1939.3	103.7	914.8	439.8	110.7	281.8													15.564	24.109	10.681	9.46	30.518	20.142	7.629		8.85	10.986	17.395	10.071	15.869	9.155	24.109	15.259	11.902	35.706
81.4	414	297.6	95.6	139.2	37	171.4		33.8	200.2	1145.3	111.9	141.5	140.2	692.2	595.4	1073.3	902.8	4727.5	1354.8													16.785	14.648	7.629	22.278	27.161	11.292	6.714		18.616	12.512	16.785	12.817	14.343	7.935	10.376	8.85	15.564	44.25
195.8	471.8	166.4	370.1	133.3	614.6	76.4		180.8	52.8	559.7	104	47.3	794.1	543	102.3	200.3	1224.7	3011.4	298													9.766	10.376	17.09	14.954	19.531	11.597	10.681		7.629	9.46	14.648	11.597	21.057	14.038	10.681	12.207	9.766	14.038
553.7	313.3	264.3	47.5	80.8	287.9	1006		159.5	200	219.5	137.1	131.5	25.9	172.1	343.3	868.6	350.9	1522.6	662.7													16.479	9.46	7.324	10.986	13.428	40.283	15.564		23.804	10.376	7.935	9.766	14.343	14.038	17.7	8.85	11.292	22.583
81.3	663.7	66.5	293.1	216.6	489.4	27.7		36.9	705.9	94.9	112.2	131.9	1263.6	1203.1	31.7	307.4	394.2	2972.3	200.4													10.986	12.207	13.123	8.24	24.719	8.24	7.935		9.46	7.324	11.597	7.324	9.155	14.648	22.278	8.545	16.479	21.057
109.7	75.1	348.8	76.1	191.8	171.9	419.8		270	309	980	352.2	87	456.8	625.5	506.5	522.9	723.9	4271.5	899.7													12.207	12.817	18.921	7.629	19.836	7.324	11.292		16.174	7.935	7.629	10.376	24.109	32.043	13.733	14.343	8.85	14.038
135.9	1345.7	172.2	37.6	225.6	242.3	184.3		294.5	598.5	40.2	167.9	90.1	301.8	913.4	152.1	651.2	164.9	1343.8	313.6													21.362	15.564	18.921	13.428	8.24	7.629	21.667		6.409	11.902	7.629	9.46	8.24	43.03	11.902	8.85	24.719	16.785
150.8	158.7	100.4	144	191.2	154.6	177.9		241.3	1007.6	676.1	213.3	211.1	57.3	79.4	160.8	627.9	190.7	1199.8	366.1													15.259	16.785	6.714	7.935	7.629	8.85	8.85		6.409	8.24	11.902	9.46	16.479	21.973	10.681	8.545	9.766	15.564
69.9	124.6	731.3	34.2	13.4	180.8	88		16.6	842.9	88.5	271.2	82.3	175.4	1092.8	47.1	486.5	47.1	467.9	135.5													13.428	15.869	25.635	15.564	26.855	8.24	20.142		10.986	10.681	14.648	10.986	10.071	17.395	10.376	7.935	11.902	20.752
205.3	484.9	56.1	275	94.8	22.4	34		129.7	1038.6	213.6	37.9	204.9	115.4	49.1	325.6	232.7	177.2	928.4	852.7													22.278	28.381	11.292	24.109	26.855	16.785	9.766		6.104	8.24	12.207	8.85	10.681	9.46	10.681	24.109	9.155	18.311
61.9	169.4	111.6	29.1	138	595.6	720.6		208.4	1370.2	87.7	348.5	27.3	148.3	1907.9	884.4	2178.1	217.8	511.8	493.5													10.071	21.667	10.681	13.123	7.629	12.207	40.894		21.362	16.479	8.24	9.155	10.986	7.324	10.071	8.24	18.005	14.038
92.3	126.1	395.4	109.5	115.8	196.5	1124		648.5	155	431.9	183.8	63.2	267.4	271.8	373.1	31.6	188.8	4432.5	56.6													22.888	13.428	23.193	24.719	14.343	12.512	14.343		8.545	15.564	7.629	8.85	7.935	13.733	10.681	8.85	17.7	13.733
211.3	232	34.8	551.9	333.8	455.7	356.5		46.9	217.5	42.9	401.1	84.2	59.8	1893.1	25.6	1511.4	960.2	8669.3	225.5													14.343	7.324	9.155	9.766	10.376	9.155	8.545		7.935	21.362	15.869	8.24	7.324	12.512	13.428	18.921	8.85	31.738
141.6	50.7	30.2	20.7	0	99	446.1		241	216.3	47.5	27.4	20.7	623.1	131.9	69.9	237.4	87.4	1875.1	99.7													25.635	13.733	24.109	11.597	10.376	16.785	16.174		6.409	12.512	19.531	7.935	12.817	8.545	13.428	30.823	11.902	22.583
60.5	47.5	58.2	73.8	184.8	168.7	806.5		446.8	765	701.8	136.3	150.3	21.8	1772.1	71.4	1341.1	574.3	1901.9	504.6													18.005	14.038	10.681	12.207	5.798	8.545	12.512		8.85	21.057	11.292	16.479	8.24	33.875	12.207	13.428	10.071	27.771
173.5	548.7	48.4	179.8	96.9	263	594.9		119.5	251.3	311.7	873.8	149.1	252.7	430.9	318.1	502.6	757.6	4260	437													9.766	7.324	37.842	9.155	8.85	9.46	8.24		6.104	15.564	21.973	8.545	46.997	18.311	14.038	8.85	13.733	32.654
238.6	17.7	99.3	166	26.7	164.8	178.5		57.3	423.5	271	736.7	59.9	260	266	789.4	181.5	42.1	3367.8	29													22.583	18.616	19.836	14.343	12.817	25.635	7.324		7.324	9.766	8.85	9.155	11.292	12.817	14.648	16.174	10.681	25.635
26.5	262.5	46.7	84.9	76	439.1	231.5		91.5	278.4	831.2	49.2	39	34	3258.1	1143.3	2031.4	124.7	3628.7	61.8													20.752	12.817	10.071	10.071	7.019	14.038	12.512		7.629	11.597	11.292	8.85	12.512	27.161	20.142	9.766	13.123	13.123
104.9	172.3	410.3	180.3	124	1061.8	866.9		399.8	80.3	244	118.9	105.9	286.6	613.7	336.5	1131.6	102.1	7444.1	512.1													21.057	24.109	10.071	12.817	7.324	9.155	12.817		6.104	8.24	11.292	9.155	10.376	24.414	11.292	8.24	18.921	28.687
41.7	418.6	81.9	64.1	135.7	65.8	128.9		26.6	121.9	135.4	75.6	21.3	64.6	249.6	406.9	2958.8	239.9	404.9	67.1													23.499	9.155	10.376	20.447	9.46	8.545	9.766		10.681	9.46	13.733	8.85	10.376	8.85	10.376	8.545	10.071	13.733
650.2	571.8	21.7	68.7	185.7	328.8	938.5		219.3	546.4	52.6	56.2	292.9	535.9	884.4	719.9	720.3	307.6	2474	98.9													14.038	33.569	7.019	12.207	12.817	8.85	20.447		7.324	8.545	14.648	8.24	8.545	26.245	10.376	15.869	10.681	24.414
62.7	291.3	1079.3	33.8	136	96.8	1725.3		101.9	116.1	771.1	121.7	86.4	201.7	38.4	589	1494.7	492.6	1568.4	482.5													10.681	6.714	7.324	8.24	14.038	8.85	8.545		18.005	8.24	10.071	8.545	14.954	13.123	27.466	14.648	24.719	13.733
13.6	899.5	25.6	137.5	109.6	1136.2	376.7		212.5	31.6	37.8	87.8	55.2	689.4	2410.2	185.9	1410.2	762.6	1663.4	471.1													13.123	15.564	11.902	21.667	7.935	21.057	27.466		20.142	14.954	14.954	8.85	15.564	23.499	9.766	12.512	12.207	56.152
175	645.5	155.4	188.4	159.1	225.6	121.9		282.3	29.9	201.3	708.5	159.4	524.6	1371.6	146.4	1092.3	304.8	2757	433.1													28.381	10.986	15.869	8.24	23.193	16.479	9.766		6.714	8.85	10.681	9.46	13.123	17.09	10.071	15.564	12.817	16.785
78.1	49.6	443.6	16.6	71.7	316.3	9.3		155.9	808.2	55.7	126	142.4	137.5	737.9	472.3	63.5	160.4	5017.7	22.9													11.597	12.512	14.954	14.648	7.935	10.376	7.935		21.973	9.46	7.629	7.935	17.09	10.071	13.123	9.155	11.292	44.556
132.2	154.1	12.9	65.2	55.7	592	292.5		28.6	613.7	176.2	308.2	206.8	559.8	97.8	90	395.8	1435.4	724.3	1019													28.687	8.24	11.597	7.324	6.409	14.343	24.109		13.123	9.46	8.24	13.123	23.193	10.376	14.038	11.597	13.733	17.09
181.4	120.9	47.5	149.1	100.6	350.5	344.2		49.1	979	91.4	29	41.6	227.4	1017.7	314.8	458.9	151.3		127.9													15.259	26.55	32.654	7.324	7.324	12.207	25.94		6.104	11.597	21.362	9.766	9.46	9.766	10.376	7.935	12.512	16.174
22.6	798.9	44	14.6	22.6	162.4	71.4		298.3	93.5	160	223.8	87.9	253.3	684.2	203.3	1320.4	78		1032													10.071	17.7	49.133	10.071	6.104	10.986	7.324		6.104	10.071	7.629	10.681	7.629	7.629	14.038	14.954	8.85	13.733
59	186	351.9	95	240.6	44.2	528		19.1	838.7	689.2	634.1	40.9	16.1	22.4	114.4	321.7	62.6		275													23.499	12.817	26.55	11.902	12.817	10.986	7.629		7.324	12.817	8.24	9.766	17.09	13.123	11.902	21.667	8.85	14.038
81.4	165	89.1	133.6	354.6	279.2	339.4		129.6	186.2	174.5	259.1	100.3	53.9	43.5	65	1715.7	403.4		1144													12.512	12.512	15.869	6.714	5.493	8.545	7.019		16.785	7.324	7.935	9.155	21.057	17.395	10.681	25.94	9.46	20.752
393.7	157.9	64	285.5	520.6	1202.5	102.2		175.8	319.9	918.2	64.9	146.6	0	1491.3	225.8	160.1	1422		169.6													16.785	9.46	12.817	6.714	7.324	11.902	10.681		6.714	8.85	15.259	9.766	14.343	17.395	11.292	9.155	9.46	15.869
132.4	401.4	637.1	186.5	255.1	303.2	381		19.7	180.1	387.9	21.4	104.6	665.9	272.4	318.7	1770.9	965.7		264.5													41.809	18.616	10.681	14.648	10.986	40.283	7.935		10.071	10.071	7.935	7.629	10.681	11.292	26.245	25.33	10.376	17.395
154.4	557.8	39.2	30.6	257.7	36.8	297.6		59.6	460.7	35.7	662.2	558.3	831.5	39.5	155.3	90.3	662.1		1212.7													10.376	7.324	21.667	11.597	23.804	17.7	11.597		19.836	10.071	7.629	11.902	13.428	9.766	10.071	24.109	18.311	13.733
569	505.1	153	207.9	133.7	95.9	53.5		352.3	1088.6	117.3	145	230.2	472.2	2907.3	175.5	231.8	404.4		1048.3													17.09	11.597	18.921	20.142	15.259	25.024	6.714		6.409	10.986	21.667	7.629	10.986	14.954	19.531	18.921	11.597	26.855
48	34.1	233.4	208.8	153.6	365.8	245.4		72.4	252.8	124.5	49.6	208.7	92.3	91.3	80.3	1678.2	140.7		334.8													18.921	7.324	15.259	18.311	12.512	10.681	7.019		6.714	10.071	10.986	16.479	9.155	12.207	12.512	14.343	13.428	19.531
34.9	144.7	63.1	287.9	246.6	47	560.7		214.1	18.7	52.7	337	36.9	297.7	472.8	52.9	497.1	620.6		394.9													10.681	7.629	55.542	11.292	18.311	7.935	7.935		9.155	7.935	9.766	9.155	13.733	14.038	12.512	9.46	9.766	26.855
33.3	115.7	25.3	51.9	200.9	462.1	229.5		77.6	1058.4	168.7	177.2	19.3	583.2	1053.3	168.5	2598.4	384.3		132.5													19.531	10.986	18.311	8.545	9.46	8.85	8.24		7.324	7.629	15.869	7.629	28.687	9.46	11.292	9.155	27.466	15.869
74.6	130	92.8	32.5	21.2	54.8	51.7		15.4	851.3	76.7	45.4	56	362.1	679.6	1806.3	1492.3	359.2		659.9													14.954	8.24	11.292	16.479	12.512	15.564	48.523		13.733	21.667	19.836	8.85	24.109	24.109	11.292	14.343	10.376	17.395
71.7	421.8	71	60.2	20.3	590.6	241.7		167.1	1468.6	254.6	154.1	53.9	303	1157.8	934.3	95.2	1641.6		75.8													44.861	19.531	7.629	8.545	20.752	7.935	11.597		35.706	15.564	20.447	8.85	18.616	21.362	12.512	8.24	8.85	22.888
42.9	168	588	219.9	210.6	111.8	1194.7		103.9	584.4	1330.9	221.3	104.7	70.8	1844.9	783.2	926.2	360.4		782.3													23.193	30.823	10.681	25.024	8.545	10.681	9.766		14.038	11.597	8.24	7.324	15.869	40.588	10.681	23.499	10.376	17.7
272.6	134.8	101.4	128	158.9	52.3	117.6		26.9	308.9	28.5	838.8	114.8	175.5	653.7	2397.2	68.4	583.2		128.5													20.752	11.902	29.907	14.038	14.648	9.766	10.071		8.24	11.597	8.24	8.24	17.7	13.428	9.766	15.259	22.888	14.954
13.8	397.3	221.9	37.6	91	51	239.3		35.6	616.9	248.1	46.6	231.3	108.9	5657.9	257.7	2125	310.5		17.9													9.46	17.395	17.395	7.935	9.155	12.512	7.935		7.935	8.545	14.648	7.935	9.766	25.635	24.109	10.681	15.869	19.836
84.8	599.9	397	14.4	193.7	303.7	25.1		136.3	79.1	454.3	617.8	32.1	1185.9	1603.5	580	1629.9	1239.5		254.4													13.123	6.714	10.376	24.109	20.752	8.24	7.629		6.104	12.207	8.24	7.935	12.207	29.602	9.766	8.545	10.376	25.33
245.8	627.5	111.4	280	66.8	294.6	984.5		424.1	1525	195.8	263.8	414.2	348.3	1049.7	177.7	567.1	1814.7		256													12.512	8.545	18.005	14.343	9.766	8.85	7.019		21.057	10.071	7.935	8.545	12.817	12.512	11.597	9.46	25.024	19.531
120.8	321	114.1	325.2	452	503.9	86.2		137.8	93.6	1134.9	67.7	187.2	448.7	439.2	122.3	1755.2	691.1		1229.5													25.635	13.733	12.207	17.09	7.324	16.174	7.629		6.409	9.155	10.986	10.376	13.428	21.973	15.259	22.278	29.602	12.512
83.2	207.4	178.1	331	103.7	94.5	48.7		37.1	96.5	142.7	63.1	195.3	209.7	57.1	1056.9	90.7	42.4		210.5													50.049	9.766	14.648	14.648	7.629	7.629	7.019		10.681	9.46	8.24	7.629	21.362	18.921	9.766	21.973	12.207	14.648
159.6	382.4	434.8	149.1	45.9	82.7	639.2		143.4	1486.1	458.6	191.9	815.4	49.3	67.8	327.2	1346.7	13.7		186													24.109	27.161	8.85	10.681	10.681	15.259	9.155		8.545	13.123	12.512	14.648	19.531	8.24	18.921	22.583	17.7	15.869
133.8	88.8	116.3	42.8	101.5	63.7	186.9		49.8	1116.8	49.5	157.8	220.9	337.9	90.9	1525.2	3730.7	75.4		450.9													21.667	7.629	15.869	9.155	36.011	8.85	8.545		6.104	9.155	24.109	10.071	9.155	16.479	18.005	16.174	9.155	15.564
231.5	592.7	46.5	26.7	145.3	565.9	388.4		175.2	130.9	929.2	125.9	114.8	756.6	467.9	177.7	569.9	1152.7		231.5													15.869	11.597	18.311	9.766	15.869	16.174	12.207		7.019	8.24	7.935	8.545	8.545	13.733	10.376	12.817	9.766	12.817
290.7	154.2	144	91.7	97.6	259.6	134.5		17.3	326.1	121.5	143.4	272	311.6	841.2	1555.4	607.5	67.1		145													19.531	36.621	7.324	18.005	17.7	8.24	53.711		26.55	17.395	9.766	10.376	14.954	15.259	10.071	14.038	10.681	16.479
87.6	1780	51.9	97.5	73.8	923.1	297.5		0.3	694	110.9	59.6	143.3	157.2	1365.3	489.6	715.1	320.2		50													16.479	13.428	11.292	10.986	6.714	8.85	11.597		27.771	7.324	30.823	10.071	7.935	18.921	11.292	10.681	14.038	18.311
78.8	287.6	8.9	24.4	238.6	50.6	390.7		188.9	343.1	390.8	444.4	251.2	614.1	238.3	688.8	339.5	1615.7		154.1													11.902	8.85	14.343	6.714	13.123	8.24	10.986		7.019	13.428	16.174	7.629	28.992	9.155	18.005	7.935	13.428	17.7
74	1535.5	114.4	219.2	119.9	111	166.4		87.5	432.9	961.3	908.7	113.9	1033.1	0.8	41.1	1268.6	286.5		689.4													11.597	10.071	8.24	7.019	6.714	18.921	7.324		7.629	16.174	15.869	9.766	7.324	12.207	26.245	9.46	25.024	13.733
93.5	21.6	642	528.2	352.3	212.3	42.1		43.7	45.3	532.3	363.4	187.1	136.5	732	321.7	194.8	749.2		33													18.005	16.174	16.785	14.038	7.629	9.766	27.466		10.071	13.123	9.46	10.376	23.193	7.629	11.902	8.85	9.155	22.888
84.4	301	79.3	148.7	48.2	261.7	125.6		157.5	1765.7	412.8	1860.5	72.6	1184.4	815.6	74.6	1119.5	77		189.6													10.986	16.174	15.564	10.071	10.681	11.292	7.324		14.038	12.207	11.292	10.681	8.24	15.564	19.226	24.109	16.174	23.193
223.4	344.9	165.9	680.3	326	580.7	243.1		151.3	336.3	240.2	214.9	163.1	546.7	69.1	273.8	63.7	98.7		408.3													19.531	10.681	13.428	8.85	13.428	13.123	38.452		6.714	8.24	19.226	14.038	14.648	32.349	15.869	13.123	11.902	20.752
167.1	646.8	215.9	201.9	49.1	331	41.5		1241.3	435.6	37.1	133.6	583.9	216.5	670.9	369.2	165.5	753.1		202.6													24.719	7.935	10.681	6.714	24.109	7.629	7.019		10.681	10.376	8.85	8.24	15.869	9.155	10.376	12.512	14.648	12.817
166	532.6	299.1	127.3	58.7	61	1158		436.2	281.9	317.8	452.8	31.3	1240.2	50.2	528.9	281.6	1340.8		27.7													24.414	8.545	17.395	11.902	10.071	7.629	46.082		20.447	12.207	10.071	11.292	9.46	9.766	10.376	11.292	11.597	14.648
70.6	1401.8	82.4	235.4	31.5	748	95.1		56	693.1	1899.9	83.1	344.7	524.8	868.7	400.9	277.3	180.5		50.6													16.785	12.817	14.954	23.804	20.142	21.973	19.531		10.071	13.428	7.935	7.324	16.785	23.193	26.855	9.46	25.635	14.954
52.6	1074.4	424.3	342.3	512.3	488.8	202.8		140.4	180.3	486.2	294.9	79.3	1089.1	1588.5	242.5	823.4	977.8		211.4													12.207	7.629	61.035	13.123	11.292	7.629	7.019		9.766	15.869	10.681	10.681	13.428	16.785	14.343	9.155	13.428	15.259
55.7	43.5	92	102.2	118.8	231.7	1138.3		80	157.1	472.6	424.4	45.5	17.9	45	2963.6	114.9	42.7		103.2													12.207	7.019	20.447	25.94	6.104	7.629	9.766		7.324	9.766	8.24	14.648	17.7	20.447	14.343	21.057	8.85	23.193
151.9	457.1	68.5	313.4	98.8	300	318		156.7	852.9	165	645	52.5	868.7	27.2	779.5	369.6	885.9		217.6													11.902	14.343	10.681	19.531	13.733	7.935	7.019		10.681	16.174	7.935	12.207	13.428	9.766	15.259	12.207	27.466	18.921
97.2	344.1	110.4	178.1	212.5	146.6	773.5		85.9	126	437	426.9	27.8	91.9	1274.7	132.5	126.2	2211.8		127.8													18.005	46.082	7.324	9.155	8.85	7.324	10.071		11.902	10.681	9.155	9.155	11.597	23.499	21.973	11.292	9.155	13.733
242.3	188.6	300.7	327.1	351.3	3.3	73.9		295.7	1239.6	623.7	256.1	110.6	168.3	210.6	312.2	217.2	729.5		433.4													14.648	15.259	13.428	10.681	10.681	7.935	7.324		7.019	10.071	9.155	11.292	7.935	18.311	10.376	16.479	10.071	25.024
59.3	181.4	404.3	366.7	147	564	207.1		228	709.2	143.1	242.1	139.8	618.7	3635.3	90	592.5	342.8		106													15.564	16.174	29.602	7.324	9.46	13.428	14.648		7.019	13.428	13.733	7.324	23.804	22.278	15.869	9.46	8.85	17.395
150.2	366.4	64.6	158	21.2	187.4	375.5		26	942.1	20.6	146.4	190.6	156.6	270.2	701.4	421	294.4		847.9													12.817	11.902	11.902	7.935	19.226	7.629	8.24		7.935	15.564	8.24	11.292	11.597	17.09	10.071	10.986	8.85	18.005
22.2	95.5	11.2	173	37.5	154.9	107.4		250.9	115.9	1139.8	71	47.4	77.9	947.3	389.8	60.1	610.2		30.5													25.33	15.564	28.381	9.766	8.545	8.85	9.155		8.85	10.681	14.954	10.376	18.921	8.85	28.687	51.575	37.231	15.259
264	340.5	196	165.2	293.3	441	713.7		264.6	90.6	627.4	478.1	323.8	508.7	1412.9	638.8	1547.4	302.6		241.7													19.531	9.155	10.681	18.005	8.85	9.46	11.902		10.376	10.071	8.85	8.85	39.063	8.85	9.766	9.766	16.479	12.512
174.8	51.8	512.7	40	21.8	33.7	617.5		89.6	95.7	320.7	384.4	256.9	364.2	1535.1	341.4	147	504.3		94.1													14.038	9.766	7.019	7.629	8.24	14.954	7.324		6.104	12.512	8.85	9.155	18.616	21.362	11.597	10.986	10.376	13.733
87.4	216.2	121.3	49.4	134.5	136.2	245.3		55.8	923.2	909.4	27.6	280.1	320.1	215.3	393	420.4	374.5		589.4													9.766	12.817	8.545	8.85	29.297	7.324	7.629		7.019	10.376	13.428	17.09	21.973	7.324	10.681	17.395	10.071	26.855
93	462.5	27.5	155.1	121.6	602.1	418.9		507.1	141.1	549.4	103.6	57.8	402.5	29.2	936	357.9	733.7		404.6													21.057	10.681	7.935	10.376	50.049	7.629	21.057		9.155	7.935	20.447	7.324	10.986	27.771	10.071	17.395	12.817	13.733
20.5	385.5	143	29.6	28.7	39.8	1138.3		183.7	136	579.9	219.3	625.6	915.1	379	905.3	523.5	939.2		186.1													27.161	14.648	13.733	6.714	6.714	11.292	7.019		7.324	9.766	10.376	14.648	21.057	8.545	13.428	20.142	13.733	14.648
573.1	256	632.7	60.3	0	302.6	369		365.8	120.5	130.4	268	155.4	24.3	963.6	604.3	376.4	74.1		196.9													18.005	7.324	12.207	6.714	6.714	17.09	8.85		10.071	11.292	10.376	7.935	15.564	19.836	10.071	7.935	14.038	14.038
130.7	231.7	57.9	44.4	370.5	265	770.5		51.4	998.7	816.5	2263	294.6	498.9	1098.6	456.9	1647.7	56.5		1485.3													13.428	32.349	6.714	11.597	14.954	8.24	7.324		17.7	10.071	11.597	17.7	10.986	22.583	13.428	12.817	12.817	17.7
350.5	120.4	126.9	18	493.3	247.6	32.9		208.1	294.4	15.4	161.3	260.4	372.1	246.9	357.3	51.4	316.2		650.1													17.7	11.292	11.292	9.155	18.005	15.259	36.621		7.019	7.629	10.986	8.545	7.324	16.479	20.447	12.207	11.597	12.817
60.5	604.1	361.5	111.4	380.5	24.2	81.4		521	490	158.4	861.4	333.5	117.2	707.8	713.5	27.5	23.9		418.3													9.766	10.071	52.795	10.071	9.766	8.85	7.935		7.629	8.545	8.24	11.902	30.212	8.545	10.681	10.376	10.681	20.752
22.2	70.2	424.4	44	39.2	70	368		547.2	813	13.5	353.2	505.3	115.9	745.9	72.7	181.8	172.4		139													11.292	22.888	19.531	30.212	6.409	16.174	21.362		6.104	8.545	11.292	17.395	9.46	23.499	25.635	9.766	9.155	12.512
75.5	89.1	224.4	71	0	173.4	423.2		369.4	231.3	110.7	583.2	45.5	267.3	345.9	814.6	143.1	248.4		60.2													10.071	20.142	48.523	8.545	6.409	8.85	11.597		11.292	9.155	8.24	8.545	12.512	14.038	10.986	17.7	9.46	16.479
26.9	180.9	91.3	45.9	149.1	55.7	162		102.7	160.8	13.7	288.3	20.8	482.3	394.1	116.6	192.7	1761.7		27.6													12.207	13.428	12.512	8.85	16.479	18.311	8.24		21.973	11.597	9.46	7.935	10.681	15.564	14.343	12.512	22.583	17.395
31.7	536.4	100.1	218.1	98.1	114.2	34.6		182.7	38	222.8	179.2	128.6	161.4	1172	141.3	697.6	655.2		60.2													19.226	14.648	7.019	6.714	10.986	10.376	9.766		9.766	11.902	8.545	11.597	19.226	8.545	10.681	18.616	9.155	20.752
120.7	49.7	517.6	307.4	137.9	388.5	990.4		834.2	106.7	73.3	224.6	260.2	14.5	578.8	465.3	228.6	300.5		71.8													57.068	14.038	14.954	12.817	5.493	17.395	10.376		8.24	9.766	12.512	8.24	10.986	10.681	10.376	10.681	8.85	16.479
157.7	143.1	35.6	233.4	158.7	60.7	436.9		44.9	335.5	428.4	958.2	363	631.7	69.2	688	3039.8	478.4		233.1													23.193	10.681	14.954	8.85	12.207	14.648	16.174		7.935	26.855	7.935	8.545	10.376	7.935	12.207	10.376	20.142	26.245
19.3	318.3	42.9	306.8	67.4	451.8	398		146.5	358	110.4	85.6	174.3	669.1	1844	270.9	508.8	43.2		704.4													14.954	11.597	11.292	16.785	8.545	7.935	7.324		10.376	7.324	10.071	10.376	25.024	8.545	16.174	13.123	97.351	14.954
77.8	69.2	108.4	154.7	393.2	104.3	1283.4		403.5	240.2	119.6	39.8	106.3	1112.1	114.3	985	0.5	173.9		92.4													13.428	18.311	11.597	16.174	15.564	27.466	7.324		14.954	14.648	7.935	10.681	7.324	18.311	11.902	10.071	100.403	21.973
176.5	233.4	104.4	203.4	98.4	41.9	362.2		104.4	104.3	52	512.4	52.2	410.9	840.3	201.2	1516.8	197.9		249.7													10.986	9.155	7.324	7.629	10.986	7.935	6.714		7.324	7.324	20.752	7.324	12.512	7.324	11.292	11.597	15.259	17.395
172.9	171.6	420.7	145.6	68.6	126.7	335.9		50.8	38.4	10.6	11.9	575.6	133.1	1282.3	404.7	356.4	230.1		1228.1													12.817	7.324	14.648	6.714	21.057	7.324	14.954		31.738	9.155	7.629	10.986	31.128	20.447	21.057	11.292	8.85	16.174
278.4	263.3	151.6	187.1	52.9	74.9	232.2		305.8	39	199.4	167.5	259.9	561.7	95.9	2154.1	404.5	300.9		421													9.766	17.395	12.207	16.479	7.324	8.545	14.954		14.648	11.597	18.311	10.986	7.019	21.667	10.071	8.24	11.292	16.174
73.4	476.9	105.5	96.8	92.9	125.9	931.1		427.9	84.1	145.4	69.7	31.5	872	715.6	1142.7	817.7	337.3		418.7													31.433	20.752	14.954	11.292	7.019	12.512	22.583		6.104	11.292	10.071	8.24	12.512	23.804	14.954	10.376	11.292	16.479
127.1	54.7	21	28.4	225.1	259.4	275.7		239.6	180.6	221.4	143.7	72	246.8	136.9	0.9	271.9	628		175.1													15.869	17.395	11.597	7.324	9.46	9.155	7.935		6.714	9.155	7.629	9.46	8.545	10.071	24.414	13.123	14.038	12.512
26.9	844	144.7	303.1	59.8	23.8	403.9		417.1	2201.3	17.8	44.7	416.8	124.3	408.5	145.3	323.5	139.7		192.2													14.954	12.207	10.681	13.428	10.071	8.85	12.817		7.935	14.954	12.817	18.616	20.142	7.324	13.428	7.935	10.681	21.057
205.2	20.3	37.3	254.1	137.5	210.3	1973.4		778.1	591.8	90	243.5	91.5	149.9	1188	680.5	399.2	299.3		21.8													14.648	7.629	17.09	6.714	9.46	11.597	7.629		17.09	16.785	13.428	11.292	9.46	15.564	14.038	8.85	10.071	19.531
94.3	349.7	41.8	132.8	110.3	107.8	498.2		84.7	462.2	303.1	404.6	353.6	245	435.1	342.3	296.1	172.5		356.4													13.428	18.005	28.687	8.24	9.155	17.395	11.292		10.376	14.038	9.46	9.766	35.095	9.766	20.752	8.545	8.85	15.869
27.3	431.8	51.3	109.4	322.4	365.4	96.9		88.1	535.5	53.3	156.1	101.9	31.8	159.3	549.2	1157.8	9.5		372													22.888	8.545	11.292	10.071	15.259	12.512	41.199		28.992	8.545	10.986	7.324	11.597	33.264	10.681	12.512	14.343	12.817
102.5	162.6	13.4	40.8	48.3	135.5	368.6		80.4	90.7	64.2	99.5	73.6	34.9	11.2	206	31.8	252.5		511.1													23.499	6.714	10.071	7.324	13.733	13.123	7.629		32.349	9.766	10.071	9.766	16.174	13.123	10.071	15.869	10.986	13.123
89.7	441.2	75.8	193.1	672.8	2226.6	87		76.7	761.1	49.6	115.7	79	397.5	551.8	228.2	1326.5	99.1		153.2													10.376	25.33	14.954	11.292	24.719	9.46	15.564		6.714	9.155	13.123	10.681	36.926	18.005	15.564	8.85	28.992	14.038
18.7	278.4	312.1	38.5	298.1	1362.2	47.8		56.7	106.8	79.1	611.6	87.2	626.7	553.8	1061.3	257	128.4		19.2													15.869	14.954	15.869	12.817	11.597	16.785	8.545		7.324	9.46	8.24	8.545	10.986	15.869	19.531	13.428	11.597	14.343
127.5	78.4	203.8	164.8	62	130.2	92.7		229.8	1160.1	117.8	830.8	288.4	428.6	163.5	592.7	559.7	1093.8		162													24.719	11.902	28.687	13.428	5.798	10.681	28.076		6.104	17.7	16.479	11.597	28.076	24.414	14.343	15.869	9.155	25.33
289.2	510.9	501.4	381.7	463.5	22.5	92.6		22.6	190.6	53.9	44.6	95.3	993.5	537.4	391.2	327.1	1004.8		1991.1													16.479	10.986	24.719	10.986	7.019	10.071	10.071		25.635	9.766	15.259	7.935	30.823	16.785	10.071	9.46	14.038	16.785
14.4	400	340	66.8	223.1	714.9	606.9		57.5	967.2	304.4	309.7	472.9	242.5	707.6	1165.2	450.3	324.6		331.9													10.681	11.902	8.545	9.46	8.85	9.155	10.986		14.343	7.629	13.123	7.935	7.629	36.011	13.428	8.24	10.681	14.648
443.2	343.6	49.1	137	439.5	288.3	173.3		16.6	53.5	222.7	347.6	97.9	74.4	1265.9	92.9	393.8	549.6		502.7													18.311	24.109	8.85	6.409	21.973	11.292	20.752		6.409	9.46	10.376	7.324	14.343	19.226	11.292	9.766	14.343	16.479
93.8	41	72.1	113.3	88.8	192.9	523.6		208.3	1112.1	765	368.7	281.3	926	373.3	1147.3	1604.9	881		755.1													18.311	17.09	7.324	15.869	8.545	13.123	7.935		6.714	7.935	12.817	7.629	15.869	18.921	9.766	10.071	10.071	13.733
49.5	212.1	64.8	99.1	26.2	102	144.6		108.6	256.3	121.2	767.4	47.2	1140.8	1188.4	73.2	213.8	417.9		59													13.428	35.706	7.019	7.324	7.935	19.226	8.85		10.681	10.376	22.888	7.629	7.019	11.597	12.207	10.681	17.09	13.733
144.1	344.2	135	54.8	44.9	779.6	45.4		335.2	82.3	121.6	164	49.9	691.2	1071.8	1531	627.5	951.1		230.1													25.024	16.785	8.24	10.376	11.902	8.24	12.207		8.24	14.648	10.376	8.24	25.94	11.292	10.986	22.888	11.902	19.226
173.1	432.6	341.4	140.3	71	145.5	247.2		168.6	460.5	241.3	32.2	133.6	107.2	554.3	581.5	1147	210.3		326.4													10.376	8.545	24.719	12.512	8.545	7.629	8.545		17.09	12.817	17.7	7.935	14.343	20.142	10.681	8.24	14.954	15.564
11.8	274.9	351	47.1	288.8	176.9	370.1		161.6	513.8	257.9	81.5	40.5	815.9	792.1	77.2	62.8	811		885													10.681	6.714	8.85	19.226	20.447	10.376	7.629		10.681	11.902	25.33	7.324	9.155	15.564	10.986	10.376	10.986	13.123
309.9	268.9	101.8	120	66.3	554.5	244.2		136.8	575.8	102.3	1059.1	277.9	474.5	217.2	475.2	154.8	162.4		254.2													9.46	20.447	15.259	13.123	22.278	10.071	10.376		16.785	9.155	13.123	16.174	7.019	8.545	29.297	15.259	9.46	13.733
62.3	90.8	338.2	264.6	546.1	91	108.3		366.9	378.8	221.5	34	547.1	605.6	17.7	229.5	80.2	447.4		1309.2													20.447	23.804	18.311	14.038	7.019	15.869	9.155		8.24	14.038	11.292	8.24	75.073	18.005	10.986	12.817	23.193	12.817
353.6	277.1	583.6	251.4	29.6	62.6	347.1		195.5	1297.6	45.2	315.2	65.4	33.5	285.5	228.2	2027.8	445.1		217.9													15.259	21.362	19.226	11.902	35.4	9.766	7.629		7.324	20.447	17.395	9.46	9.766	9.155	10.071	8.545	13.733	18.616
11.4	284.6	178.1	361.7	314.8	1055	381.6		121.7	417.5	305.2	30.8	350.7	1426	67.7	2.3	258.5	272		241.5													14.343	9.766	7.019	23.499	7.935	7.324	10.681		16.174	14.343	7.629	9.766	17.09	21.973	14.038	11.597	56.763	15.259
283	293.8	79.1	111.3	6.4	147.9	1063.3		177.9	249.7	123.7	218.7	245.7	87	1661	1221.7	59.5	123.4		304.9													12.817	25.024	11.292	10.681	24.719	7.629	6.714		27.161	13.733	7.935	13.733	7.629	21.057	11.292	8.85	9.766	15.259
592.4	168.8	189.4	13.2	87.2	285.3	223.3		60.4	59.1	294.8	304.2	202.9	1926.4	208.5	718.7	710	312.4		213.5													11.597	14.038	11.597	12.817	8.85	8.545	23.804		6.104	12.817	21.973	7.935	10.071	28.076	11.597	14.954	10.376	12.817
63.7	155.4	48.1	36	39	181.7	145.8		129.9	704.1	40.6	41.9	59.1	268.4	754.9	106.1	216.4	697.6		132.3													16.785	18.616	8.85	6.409	8.545	7.629	42.114		7.019	8.24	14.343	8.85	17.09	26.855	10.681	10.071	19.531	12.512
172.6	121	749	50.1	67.1	235	334.4		48	618.6	64	32.1	159.6	383.8	227	54.7	85.2	160.2		405.5													32.043	7.019	10.681	7.629	7.019	23.804	13.123		8.85	8.545	15.869	10.986	10.376	11.902	13.123	12.817	13.428	19.836
58.6	436.9	69.3	14.5	137.4	206.3	119.4		50.8	9.7	20	303.2	557.4	114.5	264.8	23.6	122	504.9		252.1													9.766	22.278	13.123	14.954	14.648	7.629	6.714		9.766	18.616	11.902	7.629	28.381	19.531	16.785	21.973	10.681	14.648
168.5	462.1	224.9	60.1	73.5	113.6	54.1		47.6	1064.7	52.3	842.8	188.7	833.4	2199.3	97.8	718.9	37.9		802.4													20.447	14.648	41.809	8.24	28.076	25.33	16.479		35.095	14.038	17.7	7.629	7.629	7.629	14.648	8.545	14.954	15.564
479.3	105.3	328	52.4	65.6	244.2	865.1		1.1	1406.4	302.6	404.2	49.9	319.9	2083.1	347.6	329.5	1118.6		123.5													13.123	14.343	17.395	8.545	10.376	7.935	12.207		37.842	9.766	12.817	15.259	14.954	7.629	15.259	18.616	14.343	22.278
74.9	594.9	103.6	564.3	111.1	155.2	206.5		80.6	44.4	48	110.4	412.8	351.9	737.4	35.2	125.5	274		39.4													17.09	7.019	22.888	7.324	10.986	13.123	13.428		6.104	19.226	13.733	8.545	8.85	9.766	16.479	36.316	12.512	21.973
58.5	439.6	110.6	193.4	137.1	444.3	218.2		225	171.1	53.9	169.6	282.5	485.7	2444.9	735.3	91.2	611.5		133.7													20.447	10.681	40.283	6.714	8.24	7.629	6.714		6.104	9.46	12.817	16.174	7.629	9.766	12.207	12.207	9.766	14.038
161.1	589.5	51.6	54	124.3	618.1	661.7		1	854.7	395.5	272	153.3	521.1	222.2	291.2	614.2	1098.3		141.6													12.512	12.207	6.714	19.836	8.24	9.155	12.817		7.019	10.071	14.954	7.935	8.24	9.46	19.836	9.46	12.512	18.616
100.1	252.7	91.8	31.5	36.9	63.9	413.5		475.5	898.2	19.9	451.3	32.6	208.3	1109.4	883.3	485.1	655.2		214.7													18.005	9.766	7.629	7.324	6.714	17.7	22.278		20.752	7.935	13.123	7.324	29.297	9.155	17.09	18.311	10.376	16.479
192.4	234.2	117.9	310.4	158.6	87.1	125.4		116.5	1063.9	96.3	43.7	178.7	425.5	35.8	214.8	220.9	105.8		38.1													17.395	9.155	24.414	11.292	5.798	8.24	19.226		9.155	11.902	10.681	8.24	7.324	17.7	9.766	21.057	11.597	18.311
44.2	200.7	46.7	108.5	226.7	326.3	192		335.1	282.6	23.5	203.2	114	29.8	1278.5	925.1	367.8	601.5		349.3													10.681	7.629	7.935	12.512	8.85	17.395	8.545		6.409	7.324	10.986	10.071	10.376	17.7	24.414	18.921	12.207	13.123
98.9	634.4	273.7	71.1	114.8	744.3	994.5		387.5	127.7	202.5	1058.6	48.3	840.7	29	373.2	388	1618.1		84.6													31.128	14.648	21.057	13.123	25.024	8.85	10.681		7.019	8.24	14.343	9.46	12.207	7.019	13.428	8.24	9.46	14.038
237.8	394.5	104.6	138.2	403	171.6	807		55.9	549.3	84.1	468.2	472.4	650.3	312.2	337.8	493.6	743.3		149.3													16.785	16.785	21.973	19.836	16.174	10.986	7.935		6.714	9.155	24.414	10.071	7.019	9.766	12.817	15.259	14.954	14.648
47.2	88	78.4	142	81.8	79.6	9		132.9	398.5	64	81.9	1156.1	158.8	323.9	262.5	59.1	236.3		160.6													13.733	15.564	12.207	12.512	9.155	14.343	9.155		10.376	7.935	9.155	12.207	14.038	17.7	9.766	8.24	17.7	13.428
49.1	668	78.6	326.1	97.5	179.9	309.4		41.1	65.9	144	1011	180	430.8	160.5	161.4	303.9	105.1		1163.1													45.166	7.935	30.518	9.155	15.564	12.512	11.292		10.986	18.921	10.986	10.986	8.85	9.155	20.752	8.24	9.155	18.921
115.6	829.9	71.9	36.7	91.4	62	603.4		91.5	24.4	328.1	887	187.5	1122.9	323.5	180	872.4	139.4		61.7													18.005	16.785	17.7	13.123	9.155	21.057	9.46		14.954	13.428	26.245	7.324	7.629	8.545	10.071	8.24	10.376	18.616
74.9	105.3	81.8	132.6	100.3	63.3	251.9		224.4	290.8	40.2	156	86.4	640.1	551.5	1223.6	224.3	666.9		617.2													11.597	7.935	14.648	12.512	7.935	9.155	7.019		6.104	10.681	10.376	10.071	11.597	11.902	21.057	13.123	9.155	20.447
29	17.2	219.7	140.8	174.5	223.5	1533.9		243.4	725.3	18.8	232	410.2	506.1	583.4	149.7	269	157.2		693.8													11.902	7.324	21.667	20.447	8.85	13.733	9.155		7.324	18.616	15.259	8.545	10.681	17.395	11.902	31.433	12.512	17.7
43.2	166	261.8	135.1	582.8	18.6	43.2		38.7	314.9	335.3	666.1	107	290.7	311.9	1284.5	615.5	241.6		232.9													10.376	10.681	25.94	16.174	6.409	10.986	14.954		25.635	9.155	8.545	7.935	12.512	20.752	23.193	7.935	11.597	15.869
171.2	145.4	135.3	440.2	99.5	147.9	448.5		221.7	958.5	80.8	90.5	34.5	740.8	1581.7	674.4	271.7	720.5		190.5													26.855	7.935	36.621	16.174	9.46	9.155	40.588		39.978	12.817	18.616	13.733	8.85	28.687	17.09	11.597	11.292	17.09
69.3	440.2	156.7	78.2	161.2	147.4	46		81.9	1368.4	175.5	259.3	73.6	188.9	773.6	186	80.2	219		82.4													9.46	8.545	10.071	31.738	7.935	7.629	8.85		9.46	14.648	8.545	8.545	7.019	11.902	18.311	12.207	14.954	13.428
209	110.2	178.4	321.5	184.6	45.4	276.2		49.3	13.6	301.9	66.1	429.5	105.9	219.1	384	190.4	273.8		722.7													10.681	18.005	10.376	12.512	7.629	10.071	9.155		6.409	8.545	9.155	14.954	14.954	32.349	15.869	10.376	12.817	19.836
208.4	291.8	365.9	101.9	141.2	139.4	348		53.1	279.1	32.2	57.5	237.2	285.9	194.7	268.5	200.3	1123.3		1809													9.766	13.733	10.986	7.324	7.629	11.902	34.485		13.428	10.986	10.681	11.597	29.907	8.85	14.954	8.545	9.155	15.259
256.5	214.2	321.6	126.6	396.8	204.4	220		69.3	643.3	180.6	760.7	93.6	253.4	96.6	77.3	299.4	176.8		677													11.597	28.992	6.714	17.395	12.512	7.935	8.545		6.409	11.292	12.817	7.324	9.46	17.395	19.836	13.428	14.648	14.648
65.6	483.7	222.7	208.2	19.2	512.2	796.9		443.2	867.7	87.6	716	183.7	800.9	219.3	1208.3	91.1	74		626.4													22.888	12.512	14.038	7.324	12.512	7.629	13.428		8.545	10.986	9.155	7.629	7.629	18.616	10.376	32.654	14.343	15.869
41.7	40.7	55.5	69.9	590.5	621.5	197.3		365.5	239.8	177.2	470	161.2	58.6	2148.6	1001.5	68.2	429.6		612.3													23.193	14.343	38.757	23.499	8.545	10.986	18.005		9.766	9.155	11.292	7.935	15.869	15.259	10.071	8.85	9.155	23.499
192.4	313.8	286.4	32.1	556.4	500.1	56.2		81.1	561.2	8.5	159.6	41.5	599.2	712.4	1017.4	26.5	235.3		548.4													23.804	9.155	10.986	14.343	13.733	9.766	10.986		6.104	8.545	8.545	7.324	7.324	14.038	25.94	11.292	14.038	19.531
192.6	475.3	42.4	93.1	148.6	45.8	44		102	661.6	234.2	75.9	395.3	767.4	537.8	2001.6	274.9	26.7		19.9													11.902	16.174	9.46	19.226	15.259	10.986	10.986		7.019	14.648	9.766	8.24	13.428	23.193	10.071	7.935	14.038	24.109
73.4	55.4	69.3	39.1	85.3	43.7	294.3		138.4	556.3	475.5	329.2	104.6	272.6	2115.5	150.8	455.7	1933		328.8													20.752	16.174	14.648	14.343	9.46	11.902	11.292		7.019	12.512	10.071	8.545	24.414	45.166	12.207	12.817	16.479	19.531
94.8	149.7	16.6	190.6	255.6	223.2	1019.6		89.7	319.9	233.8	19.1	147.2	400.8	566.1	371.6	450.5	1315.6		446.5													17.09	22.888	13.123	8.85	9.155	10.071	8.85		7.324	12.817	13.428	9.766	8.24	19.226	10.986	11.292	13.733	13.428
353.6	436.5	132.2	137.5	403.4	403.3	820.6		394.6	252.3	113.6	345.6	236.1	76	480.6	445.3	1034.7	6.8		1159.3													10.681	7.629	7.324	8.545	35.706	7.935	7.019		6.409	16.479	7.935	8.85	24.414	19.531	10.376	10.681	10.986	20.752
150.7	275.8	53	52.5	71.6	196.7	1161.6		67.6	200.6	171.8	898.8	117.6	795.5	1804.2	116.7	698.1	632.4		236.5													11.902	7.935	8.545	13.123	7.019	9.155	7.019		7.019	9.766	11.902	8.24	26.245	23.804	13.123	10.071	14.038	12.512
38.7	366.1	171.3	24.3	56.1	579.3	119.7		49.4	155.6	143.6	212.1	965.3	32.8	240.6	712.9	393.9	13.7		21.4													37.231	11.597	19.226	13.428	10.376	20.752	7.629		9.766	9.46	8.545	9.155	28.076	11.902	15.259	31.738	18.005	13.428
23.2	342.6	243.5	28.3	300.7	264.4	1754		193	341.7	12.7	319.1	524.6	234.3	321.5	109.2	144	715.2		107.3													16.785	9.155	6.714	10.376	10.986	10.681	34.18		6.104	8.545	9.155	8.24	8.24	11.597	9.766	16.785	32.959	13.428
86.9	284.9	15.6	147.2	748.8	733.1	802.1		591.7	655.4	118.8	369.8	50.4	548	193.2	232.4	274.2	1018.5		1219.5													24.109	9.766	9.766	10.986	17.395	10.986	10.681		6.104	8.24	15.869	7.935	9.155	20.447	25.635	38.757	12.817	13.733
74.8	551.6	409.4	115.3	29	402.3	171.7		278.3	170.4	69.6	28	58	1825.3	334.1	292.5	85.5	417.2		384													28.381	8.545	7.629	11.597	14.954	36.011	7.324		6.409	18.616	8.24	8.85	17.395	7.019	11.597	22.278	10.071	16.479
75.9	563.2	99.8	30.6	265.6	179.1	1443.5		235.7	323.3	46.2	265.5	56.6	454.8	880.4	744.5	119.6	142.4		797.1													21.057	8.545	11.292	7.935	13.733	10.071	7.935		15.564	12.512	8.85	7.935	10.681	7.019	10.071	8.24	8.85	14.038
77.2	74	155.3	49.4	401.3	451.6	41.8		64.9	811.4	94.3	86.3	65.2	839.3	2542.2	872.5	1036.6	46		558.9													10.071	7.324	49.744	11.597	18.005	17.7	7.324		6.104	7.324	10.681	7.629	7.324	8.85	11.292	8.545	9.766	13.428
145.4	779.6	278.8	20.6	75.9	317	38.1		17.5	548	213.6	56.8	341.2	1610.5	2240.3	45	1145.2	63.9		419													14.038	14.343	12.207	13.428	9.766	8.85	13.733		6.104	10.071	11.902	9.766	7.629	18.616	18.616	20.752	21.667	21.057
155.9	808.7	98.8	57	109.7	306.1	300.5		81.3	96.6	40.6	339.4	79.9	122.1	265.2	399.4	325.7	251.8		60.2													24.109	7.629	18.005	11.292	11.292	13.123	8.545		6.409	11.597	9.155	10.681	19.531	8.85	9.766	8.24	9.155	15.564
288.5	66.8	48.6	223.1	198	295.3	676		64.7	400.1	67.5	1153.2	99.5	450.7	782.9	407.9	42.7	421.7		590.7													20.142	11.292	6.714	7.019	8.85	17.7	6.714		6.409	7.629	10.986	7.324	17.7	9.46	10.376	14.954	8.85	13.733
22.1	677.3	59	364.1	0	23.1	873.2		90.6	227.6	37.5	408.4	224.7	203	368.4	106.8	169.6	141		1033.4													9.46	8.85	9.766	8.85	8.85	17.395	8.545		20.142	17.09	8.24	7.324	17.7	7.935	21.362	10.681	11.902	18.616
198.1	140.3	119.8	270.2	407.9	367.5	337		180.2	175.4	147.5	10.8	136	656.9	3820.5	292.7	281.3	333.5		0													21.667	19.836	12.207	9.155	18.005	8.85	6.714		7.629	11.902	10.986	9.155	25.94	19.836	13.428	8.85	30.212	18.921
290.5	291.6	46.4	135	59.7	196.4	1269.2		26.8	1226.2	155.2	74.7	581.7	603.7	2489.8	239.7	738.9	116.1		333.1													9.766	9.46	47.302	9.46	10.071	22.278	33.569		6.104	25.33	10.986	11.902	21.362	8.24	12.817	19.531	48.828	16.174
131.6	461.7	68.9	115.3	102.8	803.8	368.1		30.6	139.7	80.6	504.9	203.7	828.2	222.4	164.8	357.8	2180.6		59.9													18.921	15.869	19.226	12.817	13.733	12.207	12.512		7.019	12.512	9.46	9.766	14.343	7.935	10.986	10.986	8.85	15.869
184.8	70.9	81.7	411.1	39.3	646.9	434.2		202.3	317.4	31.2	82.7	105.4	1332.1	1456.2	1513.2	444.9	492.1		0													11.902	17.09	13.733	22.278	16.174	11.902	9.155		7.629	17.7	19.836	10.986	18.921	14.648	17.7	14.038	18.921	27.161
233.7	224.8	69.2	163.1	49	147.4	888.7		39.1	109.4	197.3	485.3	126	474.9	834.3	666.5	174.7	312.4		150.6													24.414	18.616	15.564	13.428	13.733	19.836	9.766		7.324	11.292	10.986	9.46	24.719	21.362	14.038	25.024	11.902	13.428
17.7	149.3	8.5	270	77.8	104.6	671.3		92.6	650.2	196	132.1	60.6	704.6	406	185.7	549.9	367.8		0													19.226	9.155	16.174	32.959	11.597	13.733	7.629		7.019	17.09	22.888	15.564	10.071	9.46	9.766	9.766	11.292	15.869
62	368.8	269.7	124.7	74.6	237.6	1644.2		162.7	190.4	29.7	233.4	85.8	2366.5	318.6	164.9	487.9	349.9		406.9													25.635	7.629	7.324	10.986	11.597	11.597	9.155		6.714	14.954	22.888	7.629	13.733	14.648	19.836	10.071	11.292	13.123
355.4	171.1	137.2	42.4	296.8	589	813.2		129.7	216.2	243.3	89.9	178.7	97.2	720.9	969.2	251.7	897.4		0													18.921	25.33	33.264	17.7	18.005	10.376	42.419		9.155	17.7	9.766	10.071	8.545	12.207	13.123	9.766	10.681	19.226
20.7	950.7	252.1	112.5	336.1	176.3	775.6		142.1	266.7	57.9	402.8	262.9	65.1	1678	183.8	385.7	187.8		755.9													14.648	9.155	21.973	14.343	8.85	11.292	16.479		25.635	10.071	10.681	7.629	17.09	13.123	23.499	10.681	8.85	15.564
28.2	81	69.5	74.9	266.2	228.6	27		400.2	31.8	401.2	98.6	22.3	533	540.8	260.9	98.8	718.3		0													23.499	9.766	27.466	9.46	14.343	8.85	8.545		15.869	10.376	27.161	9.155	14.954	16.174	9.766	7.935	20.752	12.512
68.7	229.5	143.4	77.8	335.5	33.5	651.7		88.7	258.5	119.8	426.3	25.8	141.4	739.9	110.4	101.6	300.4		27.8													10.376	6.714	58.289	14.954	17.7	9.155	8.545		6.714	23.804	14.954	8.85	10.071	16.785	11.902	10.071	9.155	16.479
19.6	84.9	64.3	335	128.1	212.7	499.2		103.7	84.7	63.7	454.6	270.8	414.3	2.3	373.2	102.3	94.6		0													12.512	24.109	11.292	13.733	36.316	8.24	25.33		7.324	18.005	12.512	8.24	7.324	10.681	23.804	10.986	12.817	16.479
28.5	521.3	77.3	66.4	145.7	689.9	57.4		167.6	274.2	596.3	62.1	451.7	491.6	946	0.9	222.5	501.9		311.9													10.376	15.259	12.512	18.005	7.935	8.545	9.46		12.512	11.902	20.142	8.85	14.954	20.752	17.09	18.005	11.902	22.278
129.3	741.6	39.1	196.6	228.8	376.6	775.7		97	33.5	87.2	186.2	644.4	183.9	1334.2	923	146.4	254.1		310.1													10.376	13.123	9.46	28.687	6.409	23.804	12.512		7.019	11.292	8.24	9.155	9.766	8.85	11.902	12.817	19.531	12.512
49.4	828.6	208.6	24.4	62	673	266		144	206.4	59.3	563.8	454	838.7	217.3	624.3	519.4	567.5		0													10.986	19.836	12.817	10.071	6.409	8.24	8.85		10.986	9.155	7.629	10.071	10.681	17.395	12.512	14.343	9.155	13.733
40.2	1238.6	195.7	259.3	65.8	462.5	2377.4		185.9	20.8	181.6	668.3	173.6	243.8	2566.6	326.3	45.6	505.2		557.3													12.817	13.428	11.902	9.155	7.324	7.935	10.681		6.714	10.071	10.681	9.155	9.766	16.785	12.207	8.24	15.564	24.719
137.5	374.9	429	148.7	307.5	416.3	1656		320.7	374.8	88.9	891.7	247.4	127.9	75.6	994.3	537.5	399.9		0													37.537	11.902	8.24	7.019	15.259	8.24	11.902		6.104	20.142	7.629	8.545	13.428	24.719	14.954	14.343	10.986	24.414
79	222.9	19.7	16.4	257.1	78.4	1171.3		23.2	101.6	58.9	146.6	36.7	658.4	1155.2	64.8	182.4	187.9		115.3													13.428	7.019	11.597	14.954	6.104	13.428	10.071		6.104	16.174	10.681	8.545	7.935	7.019	15.259	14.648	14.343	28.381
37.3	204.6	67.2	15.7	103	511.9	835		742.1	118.7	95.7	117	209.6	396.5	132.4	28	372.9	21.1		369													10.376	20.447	7.019	6.714	14.343	8.545	7.935		7.935	17.09	14.038	8.545	14.343	11.902	9.766	7.935	10.071	14.038
7.7	490.5	244.3	136.4	88.6	389.9	814.2		122.6	150.4	387.3	71.9	48.4	166.7	1795.1	67	49.6	14.7		159.6													15.259	17.7	9.46	25.024	14.954	11.902	7.019		23.804	18.921	10.681	11.902	16.479	10.376	10.681	12.512	11.597	13.123
40.2	297.6	30.6	27.2	243.9	152.7	605.1		501.7	21.2	133.6	69.6	616.6	57.3	285.7	616.9	376	217.2		75.4													12.207	14.954	14.648	20.447	14.038	10.376	8.545		10.071	25.635	11.292	10.376	14.954	20.142	17.395	7.935	12.512	15.564
298.1	114.7	269.6	86.1	627.9	49.8	17.4		62.8	158.2	15.6	63.2	128.7	652.1	344.3	121.4	251.1	1.9		290.1													10.986	19.836	14.954	17.7	5.493	7.935	14.648		6.104	34.79	15.259	8.24	21.057	12.512	21.057	11.902	24.414	19.531
275.3	175.3	122.4	115.7	301.5	166.3	825.6		67.9	46.8	207.4	219.8	297.5	133.6	1965.4	565	319.1	581.6		409.7													15.564	19.531	8.545	10.071	7.935	15.259	7.629		31.433	21.667	10.071	8.545	9.766	11.597	10.681	25.024	10.071	21.057
73.1	259	233.8	330.8	104.3	242	139		266.9	293.3	226	635.9	66.3	455	1471.2	638.2	157.4	29.4		74.8													31.433	10.986	7.324	8.85	5.798	18.311	12.207		14.954	8.85	8.85	10.376	13.733	23.193	10.681	8.85	8.85	16.785
83.6	385.4	52.9	226.3	197	83.5	592.7		46.3	102.3	59.5	139	75.1	260.3	1209.6	1137.7	148.7	478.6		402													10.681	12.512	15.564	16.479	7.935	10.071	8.85		7.629	9.766	7.935	9.766	11.902	11.597	13.733	21.667	17.7	16.174
70.9	70.7	19.8	21	387	427.1	72.5		193.3	29.3	54.4	329.8	142.8	622.6	269.6	257.7	29.5	910.5		339													14.038	12.207	45.776	11.597	22.278	8.545	14.648		7.935	12.817	14.038	10.376	30.518	15.259	14.343	20.142	10.681	13.428
288.8	68.2	71.4	58.6	646.6	68.8	599.2		291.8	52.2	143.3	62	129.2	56.7	5569.5	233.3	1011.2	753.4		209.7													12.817	7.629	12.207	10.071	15.564	28.076	7.324		35.095	16.785	8.85	9.766	17.7	8.24	20.142	8.85	12.207	25.024
101.5	642.8	28.2	60.5	328.8	447.3	293.7		128.2	54.4	44.4	212.1	17.7	1086.6	871.2	459.8	650.9	255.6		1084.4													12.207	11.292	13.733	10.986	14.038	10.681	9.766		11.902	21.057	14.648	10.071	7.324	16.174	20.752	13.123	9.155	17.395
249.7	174.6	196.4	119.6	198.8	278.9	1292.9		26.3	18.6	249.7	119.2	298.1	297.8	3165.3	1351.2	151	750		637													40.894	13.123	71.106	6.714	9.766	11.902	18.005		7.324	11.597	22.888	19.226	7.629	17.7	9.766	11.292	12.817	14.648
80.4	367	97.3	125.8	170.1	627	1073.6		54.4	33.9	288	253.9	290.9	550.2	337.8	686.7	112.2	40.2		889.8													18.311	20.752	27.771	8.545	17.7	7.629	11.902		7.629	12.207	9.766	8.545	7.324	20.752	14.038	9.155	14.648	27.161
10.4	144	306.9	18.9	138.7	221.4	610.8		429.6	26	425.6	125.5	57.5	597.5	754.4	39.3	594.5	610.3		729.6													27.161	18.311	12.817	11.597	17.7	15.869	9.766		44.861	18.311	22.583	7.935	11.902	23.804	10.681	24.414	12.512	14.038
20.2	552.9	104.8	25.9	741	36.9	234.8		178.6	78.6	23.5	156.6	162.2	156.2	1262.5	1774.8	170.6	1.9		103.4													31.433	10.376	6.714	8.545	8.545	7.629	15.869		10.986	16.479	9.46	10.681	9.766	7.324	9.766	25.33	9.46	19.836
242.7	529.3	58.1	237.4	72.9	639.9	122.8		114	88.5	13.5	51.1	467.1	376.2	538.5	64.8	229.1	163.2		1561.2													11.597	18.616	20.142	11.902	7.629	8.24	7.629		10.681	8.545	23.804	8.545	13.428	11.597	17.395	12.207	11.292	22.888
20.4	104.5	294.3	146.6	236	33.6	13.6		21.5	49.7	43.8	85.4	317.9	770.8	1308.4	353.6	149.7	324.5		288.4													11.902	8.24	13.733	6.409	8.85	8.24	11.597		23.804	9.766	8.24	7.935	35.4	16.479	27.466	19.836	9.46	22.583
221.3	276.3	207.5	16.1	85.2	26.3	1502		195.3	102.4	488.2	488.7	63	19.6	1075.4	88.9	55.9	198.5		389.2													13.123	25.94	15.259	10.681	28.076	7.629	11.597		18.311	22.888	25.33	9.155	25.33	11.597	18.005	7.935	9.766	18.005
467.1	135.8	331.7	57.9	118	484.1	446.7		128	780.2	286.4	414.2	197.2	61.4	350.7	43.3	19.4	290.8		404													12.817	8.24	40.894	7.324	12.512	11.902	8.24		18.005	13.733	11.597	8.24	20.142	24.109	12.512	14.038	9.46	13.733
84.3	370.7	297.9	208.7	43.5	26.3	1175.8		190.5	431.7	82.1	300.7	48.7	779.1	4120.4	428.8	408.7	31.5		47.1													20.142	18.616	28.381	8.85	5.493	10.376	11.597		16.174	12.207	27.466	7.324	9.766	10.071	25.635	8.545	10.986	12.512
193.2	634.4	190.6	294.3	591.2	582.7	96.1		81.1	197	525.8	187.5	80.7	1093.4	1167.6	359.1	236.7	497.2		96.8													14.648	37.842	10.071	7.019	27.771	25.33	27.466		6.104	25.635	11.292	7.629	8.545	10.681	20.447	29.602	12.817	13.123
11.2	658.4	78.9	251.8	101.8	399.4	233.7		8	84.4	222.1	39.9	156.1	1254	175.6	1218.7	1305	68.5		732.6													9.46	24.719	13.733	9.46	9.766	10.681	8.85		6.409	8.85	10.071	10.071	7.019	11.902	10.376	27.161	13.123	12.817
93.8	52	290.1	117.7	74.6	581.3	48.5		166.6	59.4	142.6	438.4	367.3	459.2	648.1	202.4	125.6	213.9		444.1													9.766	7.324	13.428	19.226	7.935	19.836	7.019		12.817	25.94	9.46	9.155	20.447	29.297	16.174	7.935	10.376	15.869
100.5	236.3	116.5	101.4	165.8	187.8	103.4		686.8	82.5	25.7	244.9	463.9	1986.8	659.8	732.8	216.3	226.8		44.6													13.123	14.038	9.155	18.921	6.409	8.545	7.019		9.766	10.986	11.902	11.597	13.123	22.888	13.428	18.311	10.376	23.499
37.4	96.2	48.4	824.9	119	159.9	1796.3		66.9	100.2	427	72.6	466.9	938.1	387.8	85.2	222.1	567.3		138.7													13.428	14.038	27.161	13.428	8.545	10.376	8.24		6.714	13.428	7.629	9.155	12.207	16.479	11.902	24.719	10.376	14.954
100.2	248.8	20.7	132	83.6	158.4	176.9		660.9	102.7	59.2	347.6	295.1	1212.2	148.1	87.9	541.3	422.6		875.5													24.414	14.648	9.766	13.733	28.381	9.155	7.935		7.935	14.343	8.545	7.324	12.512	19.226	15.259	9.46	19.226	18.616
226.8	263.9	159.2	366.8	98.8	126.5	421.8		107.4	81.2	226.8	182.7	265.9	301.8	419.4	365	167.3	70.6		447													30.823	13.123	23.193	8.85	9.155	13.123	6.714		27.161	7.935	9.155	21.057	19.836	14.954	30.212	8.545	24.109	14.648
75.2	79.1	17.7	54.3	746.9	225.9	238.8		83.8	611.5	108.3	101.1	182.9	477.2	833.6	309.1	446.6	284.9		205.3													15.869	17.395	19.531	8.545	9.46	26.245	6.714		6.409	16.174	10.681	7.935	10.681	21.362	14.343	11.902	11.902	14.343
72.4	70.2	220.2	428.2	82.6	799.6	1740.6		161.1	745.6	48.5	657.3	181.6	269.2	2421.7	49.9	373	497		380.5													17.395	18.921	15.259	10.681	19.836	9.46	6.714		9.766	9.46	9.155	10.986	8.545	16.785	10.071	15.259	9.46	19.836
286.9	34.1	132.5	10.4	86.8	29.3	249.3		614.4	358	76.9	183.5	58	475.2	571	324.8	618.7	8.5		259.4													9.46	7.935	13.733	21.973	11.597	11.597	6.714		6.409	25.635	21.667	18.005	15.869	14.343	10.071	10.376	9.46	16.174
109.4	453.3	1.4	35.8	138.2	58.4	121.1		81	563.7	256.6	75.3	390.5	331.4	161.7	443.1	95.3	121.9		75.2													12.207	12.207	20.447	10.071	7.629	9.766	31.128		6.104	12.512	12.512	10.681	8.545	12.512	11.902	9.46	9.46	24.719
78.1	10.9	101.1	85.6	357.6	68.6	72.9		410	130.1	638.8	62.7	61.8	113	3078.6	213.7	230.8	1420.1		239.1													23.499	10.681	16.174	9.155	11.292	15.564	9.155		8.24	15.564	7.935	9.46	11.597	28.687	13.123	12.512	16.479	15.564
71.2	900.7	264.5	335.3	47.7	43	102.3		78.6	649.9	81.8	1067.7	332.6	80.3	1526.3	1076.4	912.8	147.3		147.4													20.752	24.414	11.292	9.46	7.935	7.324	49.744		7.935	21.057	12.207	7.935	16.479	7.935	16.785	13.123	24.414	13.123
363.2	67.3	317.6	46.8	81.2	117.2	1241.1		147.2	99	88.2	325.8	637.9	628.5	221.7	1141.9	640	606.3		229.8													13.428	15.259	34.18	17.09	18.005	11.597	8.545		28.992	20.447	13.428	11.597	19.836	12.817	15.259	11.597	10.681	14.954
109.7	1615	40.5	44.2	134.8	247.2	46.9		528.4	22.5	40.3	94.4	103.9	2026.7	2361.4	691	907.1	651.3		232													18.616	20.447	13.428	6.714	9.766	15.259	8.24		6.104	8.24	17.7	7.324	19.836	17.395	18.311	11.902	13.123	12.512
96.7	321.9	396.2	21.9	90.8	155.8	382.5		217.8	156.5	64	460.6	409.4	115.2	38.9	137.5	334.6	109.1		371													16.479	14.954	21.362	15.564	6.104	7.324	22.278		10.071	11.292	18.005	14.954	8.24	14.038	20.447	12.817	15.564	14.954
323.2	193.4	44.6	463.2	160.8	164.3	2535.2		153.7	65.9	381.3	279.3	318.4	145.3	575.3	54.1	169.7	1735.5		457.8													9.766	8.24	27.771	6.714	6.714	25.024	7.935		7.324	7.629	15.564	7.935	9.46	18.311	10.071	21.362	25.024	15.564
160.9	791.6	22.4	228.8	423.2	1095.7	333.2		38.5	351.4	164	44.6	192.6	187.6	441.4	0.7	373.8	202.7		210.8													11.902	10.071	42.419	8.24	10.376	7.629	6.714		11.597	14.038	7.935	9.766	22.278	33.875	15.869	21.973	8.85	12.817
38.8	261.4	216.1	128.7	248.4	275.5	290.1		38.2	330.9	35.1	43	185.4	406.6	379.6	566.1	50.1	716.2		118.8													18.005	52.49	13.123	7.019	10.376	10.986	10.986		8.545	21.057	7.935	7.629	7.324	9.46	15.564	11.597	15.259	15.869
49.9	2239.3	251.6	67.5	109.6	194.6	527		505.9	215.6	118	39.1	151.2	215.3	930.6	1001	482.3	261.9		57.7													10.986	17.7	7.019	6.409	7.935	8.24	10.986		11.292	19.531	10.986	16.785	31.128	21.973	10.376	8.24	28.381	20.752
94.2	46.1	148	407.2	1003.6	35.8	2280		56.9	146.5	43.4	178.5	148.1	160.9	1019.6	49.6	455.1	526.3		644.9													13.428	7.019	20.142	7.629	8.85	7.324	15.564		6.104	23.499	7.935	15.869	7.324	7.324	10.681	10.071	9.46	34.79
364.3	853.1	94.6	147.5	35.2	117.8	1201.7		134	79	125	262.1	244.7	349.5	643.2	24.7	597	389.7		354.5													14.343	15.259	15.869	6.409	29.602	21.057	30.518		29.907	10.071	9.766	13.733	13.428	13.123	12.817	9.155	15.869	16.174
254.7	157.7	26	507.2	136	259.7	978.8		35.4	461.5	23.3	471.1	97.8	415	590.1	359.3	209.1	506.8		324.5													20.142	9.766	18.921	15.564	19.226	7.935	13.123		7.019	19.836	7.629	11.902	35.4	10.681	12.512	7.935	11.292	13.733
79.1	863.7	98.3	25.6	172.1	328.4	423		125.6	198	117.7	254	539.9	245.2	290.4	80.8	90.3	620.6		174.7													10.376	26.245	10.986	11.597	10.681	25.94	32.959		7.324	11.292	21.667	11.292	10.681	24.414	10.681	20.142	8.85	15.564
30.7	675.1	10.5	62.4	493.3	147.7	96.1		564.8	21.6	146.4	356	90.7	154.7	601.9	1602.5	110.7	877.7		617.8													17.395	12.817	14.038	16.785	14.954	9.155	8.545		12.207	10.376	10.681	7.935	7.019	20.752	13.123	12.512	8.85	12.817
103.8	201.5	574.4	32.3	460.5	175.4	313.8		296.5	461.4	16.1	254.1	55.7	958	1141.1	322.3	1042.6	269.2		183.5													11.597	15.564	10.071	7.629	19.531	10.376	14.954		14.038	14.038	13.123	12.207	18.005	14.648	10.986	11.902	16.174	12.512
102.6	92.7	557.5	231.7	410.9	112.2	98.8		73.4	37.9	116.1	129	291.3	459.2	320.4	176.4	831.6	117.8		227.8													12.207	29.907	10.071	8.24	32.349	7.629	24.109		7.629	22.278	8.545	16.785	11.597	10.376	9.766	9.766	21.362	17.395
82.8	92.6	666.1	168.3	259.3	221.3	304.5		197.2	62	60.1	102.7	257.5	636	977.4	116.7	107.6	179.4		977.7													13.428	8.545	25.94	8.85	10.376	12.207	23.499		8.24	25.33	10.681	18.616	9.155	8.545	10.681	12.817	18.311	15.259
60	501.6	132.3	81.2	322.8	260	35.6		376.5	189.7	33.9	248.1	81.4	1457.1	952.7	751.8	286.9	247.6		441.5													21.362	15.259	15.259	9.46	7.935	8.24	15.259		6.409	14.954	8.24	14.648	14.038	11.292	18.005	10.986	14.343	14.954
125.5	400.1	115.1	96.6	604.9	250.2	714.9		369.4	379.9	60.4	28.4	34.8	1130.2	140.6	349.3	54.6	371.5		257.5													11.597	13.123	37.231	18.616	6.409	8.24	10.986		39.368	24.414	23.804	9.155	43.945	17.395	16.174	8.85	9.155	15.564
63.3	473.1	184.5	189.9	356.8	554.3	23.9		98.3	190.8	636.1	85	106.4	37.2	337.7	118.3	270.1	815.3		1172.8													16.174	27.466	20.752	10.986	16.174	21.057	15.259		6.104	12.512	12.817	8.545	14.954	27.466	10.986	17.395	11.292	15.564
78.2	188.2	457.5	16.5	20.4	1354.3	511		50.8	67.2	59.5	302.4	232.8	619	1308.2	149.5	499.7	1381.1		83.5													22.888	11.597	19.226	23.193	7.019	10.681	11.597		7.629	21.057	8.545	8.545	10.376	25.024	10.071	10.986	17.09	45.776
249.9	222.6	207.4	95.8	23.9	246.7	212.9		145.5	86.3	457.6	28.1	230	160.4	1674.6	64.6	954.9	315.6		501.8													15.564	7.324	13.428	16.785	6.714	23.193	8.24		6.714	13.733	7.629	12.817	19.226	23.499	20.752	18.311	12.207	15.869
8	286.6	148.2	11.8	140.3	33.5	401.7		127.1	13.9	516.3	253.4	126.3	617.6	1198.1	350.2	141.7	29.3		712													22.888	16.785	15.259	19.226	7.629	18.616	11.292		6.104	18.311	11.597	7.629	14.954	40.283	18.005	17.09	10.376	17.395
64.8	1054.2	563.7	98.4	124	468.1	358.1		149.5	40.9	181.1	1012.4	80.8	1563.9	2915.5	452.6	180	147.6		474.4													14.648	7.629	34.79	15.564	9.766	9.155	7.935		7.324	14.648	14.038	8.545	14.648	19.531	12.207	14.038	12.817	14.343
42	58.5	28.7	114.8	411.5	697.7	627		19.4	44.6	237.2	733	229.8	728	164.1	141.3	28	769.9		55.5													14.343	8.545	8.24	8.85	5.493	8.545	7.629		30.212	8.85	18.921	7.629	14.954	10.071	11.597	14.038	14.648	17.09
79.6	92.3	49.7	696.1	263.6	197	221.9		96.9	168	347.1	238.8	32.4	639.7	1440.7	118.6	123.7	1141.7		484.2													16.785	14.954	7.324	8.24	7.629	12.512	7.629		12.512	8.85	9.46	7.629	22.278	7.629	16.785	10.986	9.46	13.123
191.4	140.8	141	55.6	167.5	101.3	81.1		85.4	93.7	25.5	220.4	124.8	269.1	1735.1	360	168	457.4		113.1													18.311	11.597	12.207	9.766	10.071	21.667	7.019		8.85	7.935	13.428	9.766	13.428	10.986	10.986	10.681	9.46	29.602
24.6	334.5	72.5	91.1	0.5	300.7	262.1		62.7	520.6	104.8	111.9	117.9	1003.6	1062.8	329.6	31.3	271.8		787.2													12.207	23.804	10.071	10.071	11.292	10.986	7.324		14.343	7.629	8.545	8.85	23.499	21.973	18.005	8.545	13.428	13.123
53.6	278.2	263.1	193.7	62.3	282	725.8		75.5	604.6	94.3	29	69.7	250.7	1485	2077	431.6	786.2		21.2													11.292	7.629	7.019	14.038	13.733	20.142	8.24		6.714	9.46	7.935	7.324	16.785	7.629	10.986	10.986	10.376	40.283
191.3	75.8	70.2	368.9	195.3	99.8	567.8		169.4	203.9	760.8	217.9	309	110.5	429.9	446.5	108.7	589.3		66.6													10.071	6.714	13.733	9.155	20.752	9.155	9.155		6.409	22.278	7.935	7.324	7.935	20.752	28.381	15.259	9.155	21.667
145.7	259.8	857.8	221.7	534.3	384	247.9		121	385.4	199.3	51.6	315.7	623.1	283.1	250.2	84.2	732.4		341.2													13.733	6.714	18.005	13.428	15.259	12.512	6.714		14.954	14.038	15.564	13.733	8.545	18.311	16.174	13.733	9.155	19.836
68.7	75.7	294.4	46.9	168.3	283.2	196.7		142.3	239.8	190.8	244.1	115.7	668.6	581.6	887.5	275.9	232		224.2													28.076	14.954	48.523	11.597	8.24	8.545	7.019		12.817	20.142	16.785	7.629	13.123	7.935	10.071	9.155	11.292	12.817
88.7	156.1	147.4	12.8	21.8	210.6	501.1		361.7	644.3	111.3	219.3	57.4	215.5	1301.4	627.8	167.8	588.9		460.9													20.752	11.597	12.512	13.123	10.071	22.888	7.019		9.766	14.648	7.935	8.85	7.324	20.752	10.986	27.161	11.597	21.057
50.9	451.7	117.4	156.2	183.7	460.6	132.7		128.3	129.4	242	60.2	127.3	1540.1	374.5	374.9	81.1	156		957.1													14.954	7.935	13.428	11.597	9.155	7.629	18.921		6.104	12.207	8.24	9.46	8.85	10.376	12.817	25.94	9.766	16.479
20.5	561.8	958.5	158.9	297.2	90.3	64.5		173.6	101	28.7	190.6	260.4	157.1	28.8	1199.4	813.3	34.4		236.2													34.79	7.019	10.986	7.629	14.343	8.24	7.935		7.935	13.123	24.719	8.85	14.343	16.479	12.817	28.076	12.817	19.836
78.5	911.2	132.4	23	364.6	697.3	231.8		233.9	78.5	52.9	69.8	231.5	207.3	774.9	0.9	96.4	1482.7		560.3													21.667	11.292	10.376	6.409	8.85	34.18	7.935		6.409	21.667	16.785	11.902	21.362	8.545	9.766	29.297	11.902	27.161
169.2	270	127.7	289.6	119.6	100.5	55.4		84.2	162.8	40.6	421.6	786.3	1267.4	2833.4	83.9	230	734.2		154													9.46	21.667	12.512	12.817	8.545	21.973	8.545		7.019	11.597	21.362	12.817	20.142	7.935	10.986	18.005	25.635	16.174
394.2	1136.9	38.4	321.7	1184.4	87.2	67.8		208.2	219.3	147.6	203.5	59.2	111.7	550.9	527.7	204.3	169.9		1016.4													13.123	9.766	7.019	18.005	12.512	15.869	14.648		21.057	10.376	17.09	7.935	8.24	24.719	12.512	37.231	14.954	14.954
134.6	26.7	220	72.6	185.6	145.5	20.3		115	143.9	344.6	102.2	104.1	355.1	1291.5	56.6	313.6	331		79.3													19.531	15.564	8.545	23.193	11.292	7.935	13.733		8.545	8.24	9.766	9.46	12.512	18.311	10.681	10.681	10.986	14.648
27.7	323.3	78.3	84.9	199.5	108.8	518.3		18.3	526.9	319	469	37.2	76.8	195.3	853.5	87	1323.3		71.8													20.752	19.836	28.381	13.428	14.954	11.292	12.817		15.564	14.343	10.986	9.766	11.902	17.395	16.785	8.545	8.85	15.869
46.5	200	96.4	152.3	23.3	244.5	487.2		364.2	86.3	268.7	70	258.9	76.4	866.4	2067	35.5	38.4		675.1													14.343	12.207	27.771	9.46	8.85	15.869	7.324		22.888	7.324	16.479	14.343	7.629	19.226	10.986	8.85	10.986	25.635
322.4	140.6	223.5	550.3	49.1	194.4	403		264.9	15.1	155.8	153.4	35	153.8	877.8	1750.3	512.5	383.7		974.8													13.733	18.311	7.324	7.935	7.324	10.071	10.986		7.629	7.629	13.123	8.24	18.311	8.85	21.973	11.902	9.766	12.512
33.5	206.4	30.6	20.2	35.6	175	1110.6		25.6	1122.3	88.4	306.9	54.1	175.2	1780.4	714	284.6	336.2		31.6													28.076	10.986	7.935	14.038	5.493	10.376	10.071		9.766	12.817	12.817	7.324	35.095	10.071	11.292	16.785	10.071	12.817
599.7	302.3	40	266.3	197.4	227.3	518.7		24.8	333.1	440.3	73.5	468.3	498.2	718.6	43.1	68.5	152.2		67.4													26.55	7.629	23.499	9.46	31.128	22.278	8.85		7.324	7.935	7.935	10.986	7.324	21.362	11.902	7.935	10.376	13.123
41.7	13.9	164.6	171.1	189.7	333.2	1048		58.5	391.9	130.5	53.8	26.8	254.5	624.5	223.1	42.6	24		296.1													23.193	9.766	9.46	8.85	26.245	7.324	10.376		6.409	7.324	18.616	11.902	11.292	8.85	13.123	14.038	8.85	24.719
33	415.5	419.4	173.6	163.4	145	38.7		107.3	638	128	311.1	260.5	2569.5	2429.3	466.8	19.7	100.2		374.4													11.597	8.85	27.466	9.766	8.85	28.687	12.207		7.019	16.174	11.597	10.681	10.986	12.512	14.954	26.245	14.038	13.428
113.9	115.2	645.2	72.1	93.7	31.1	154.6		129.7	846.2	205.5	113.4	129.8	87.7	1494.8	512.2	141.5	1800.5		153.1													15.564	11.597	7.019	14.343	6.104	9.155	9.155		30.823	11.597	9.155	7.935	20.752	11.902	10.681	9.46	8.85	21.973
48.4	95.8	148.3	356.1	234.7	337.7	394.4		126.7	41.2	165.9	482	232.4	282.5	786.1	256.1	556.1	29		267.5													9.766	12.512	17.395	9.155	10.071	18.005	8.85		17.7	12.512	7.935	7.629	8.24	12.817	24.719	16.479	9.766	28.076
98.8	137	18.5	48.2	165.9	342.4	34.1		394.9	20.1	76.2	231.6	478.8	136.2	862.7	105.4	31.5	915.2		421.5													32.959	22.278	11.292	18.311	18.616	16.479	39.978		9.46	15.869	10.071	9.46	12.817	20.752	12.512	8.545	9.155	16.479
217.8	347.1	57.4	181	115.9	213.1	1022.3		154.5	114.4	97.3	738.9	370.3	95.6	17.6	909.3	51.9	779.6		243.3													39.063	10.071	12.512	18.616	31.128	8.545	10.986		7.629	23.804	13.428	8.24	15.564	16.479	19.531	14.343	8.85	24.414
262.1	826.4	120.2	93	326	317.7	487.8		42.1	453.3	198.9	76.8	50.1	19.1	215.7	188.7	148.6	310.9		136.7													18.616	9.766	23.193	7.019	10.986	14.038	6.714		12.512	21.057	25.33	11.292	10.681	15.869	18.616	16.479	15.259	13.733
17.3	107.8	275.4	20.5	80	552.5	344.3		28.8	39.9	79.7	435.4	177	23.8		42.3	19.9	2380.9		78.8													21.667	8.545	9.155	6.409	7.019	14.954	37.842		35.706	7.324	11.292	8.24	8.85	16.174		7.935	23.193	31.433
52.4	576.9	83.6	67.3	85	197.6	812.1		40.5	16	47.7	502.6	164.7	208.7		736.3	15.4	1408.6		403.3													9.46	15.259	14.038	14.343	5.493	16.174	14.648		13.733	8.85	17.395	12.207	17.09	24.414		25.33	11.597	15.869
20.7	185.7	90.4	41.7	167.4	124.1	1272.4		215.5	332.4	371.6	351.2	320.2	416.5		750.1	294.3	277.7		187.7													13.123	7.019	9.155	9.766	6.104	24.414	8.545		9.46	7.935	7.935	16.174	24.719	32.654		17.395	22.278	14.954
178.6	462.4	44.5	215.2	182	586.7	35.7		609.8	518.9	375.4	732	840.2	184.3		1.7	671.4	97.1		865.5													10.986	10.376	8.85	10.376	7.019	8.24	9.155		7.324	11.292	10.071	11.292	12.207	34.79		20.142	13.733	18.616
127.1	609.2	39.9	26.8	749	1008	27		419.4	87.6	100	227	58	89		378.3	725.6	156.4		584.5													24.109	21.057	7.324	10.376	6.714	10.681	12.817		12.817	17.7	17.7	9.46	39.673	12.512		7.935	8.85	17.09
55.9	475.1	14.2	300.8	35.7	254.5	201.7		210.6	2026.1	193.8	1044.8	125	847.1		1.7	48.1	186.3		72.5													27.771	10.071	33.875	17.09	27.161	24.414	7.324		7.019	7.935	10.986	10.986	10.986	20.142		11.292	9.766	16.479
27.9	389.1	89.7	149.1	271.1	180.4	632.3		239.7	124.5	170	494.5	69.5	112.2		211.4	30.1	38.8		1237.5													22.278	13.123	19.836	20.447	12.512	25.635	7.324		6.409	12.207	8.545	8.24	10.071	11.292		26.55	12.512	22.278
24.6	534.4	43.7	236	116.9	674.6	1155.6		105	413.3	342.8	531.3	281.7	78.7		694.6	821.5	131.4		129													16.174	15.869	11.902	13.428	16.785	7.324	39.673		7.629	9.155	8.545	12.512	12.817	21.973		10.376	12.512	17.09
50.6	73	190.9	78.3	232.1	170.8	161.3		161.6	164.1	396	114	147.4	29.4		577.5	394.2	304		421.6													9.766	8.85	13.733	14.954	9.155	10.681	7.629		6.714	7.629	14.038	8.24	9.766	14.954		24.414	9.766	13.428
243.5	338.1	511.3	78.3	115	231.9	2479.4		208.3	79.6	260	393.5	264	695.9		566.3	158.7	466.9		170.9													10.681	8.85	18.616	21.362	8.545	9.155	7.324		8.85	7.629	12.512	16.174	14.954	7.324		7.935	9.155	13.123
231.2	13.8	53.2	21.7	105.4	335.3	1034		201.9	362	643.8	46.2	42.6	436.9		427.2	7	446.9		486													37.842	17.7	9.46	7.935	6.714	8.85	9.46		6.714	14.038	10.681	10.071	25.024	31.738		26.855	11.292	12.512
132.8	320.4	432.2	15.1	400.4	1149.8	41.4		190	220.8	47.1	369.9	173.3	100.2		251.4	28.3	248.8		270.8													21.362	7.935	7.629	11.292	20.752	19.226	6.714		7.019	10.986	12.512	8.545	12.207	10.376		15.259	8.85	13.428
192.9	321.9	69.1	19.2	553.5	18.8	2123.2		106.7	41.3	552.2	116	125.8	320.7		176.4	442.2	255.1		247.9													18.005	14.954	60.73	31.433	14.038	28.992	10.681		22.888	11.597	8.545	7.935	7.019	23.804		15.259	15.259	17.395
20.9	1005.8	54.2	204.2	105.1	340.7	1116.1		292.5	937.6	145.6	280	287.9	29.2		506.8	1988.9	611.7		51.9													23.193	9.155	7.935	11.902	17.7	14.648	6.714		8.545	11.292	14.648	25.024	12.817	7.019		18.921	10.071	14.343
41.9	538.3	168.7	104.4	217.4	185.8	451.3		476.9	598.4	52.4	341.9	715	444.8		209.7	132	210.2		795													32.654	8.545	23.804	10.986	8.545	10.681	8.545		10.986	9.766	12.512	9.155	15.564	42.114		25.33	19.836	22.278
495.4	41.6	50.8	181.4	112.4	69.2	2321.2		847.2	901.3	256.4	439.1	112.2	48.3		49.2	95.4	69.3		464.5													21.973	11.902	8.545	14.954	9.46	9.155	15.869		7.324	8.85	9.46	8.85	25.94	25.635		12.512	10.986	16.479
84.5	752.7	258.7	48.5	280.5	424.2	103.5		25	1839.3	69.6	855.3	105.9	308.6		137.9	512.1	44		247.9													28.076	12.512	20.447	9.766	5.493	9.155	16.174		6.104	7.324	8.85	10.376	19.836	14.343		8.24	20.447	16.785
139.6	640.2	241.6	287.3	69.3	171.3	1415.1		80.8	34	11.9	61.4	262	137.7		2933	1011.9	349.2		24.5													24.109	7.019	16.785	17.7	17.395	8.85	8.545		7.629	13.123	13.428	10.071	14.343	24.414		12.512	16.174	16.785
183.9	303.8	99.3	116	219.5	184.2	161.6		90.7	119.2	83	137	36.5	461.3		209.1	122.3	148.9		281.6													11.597	10.376	31.128	25.024	6.104	10.986	8.24		8.24	8.85	11.292	14.343	9.155	17.09		9.46	9.766	14.343
289.3	264.8	15.5	80.2	571.6	308.4	1489.4		521.5	370.9	506.8	565.5	16.7	54.8		821.9	785	523.5		398.4													12.207	47.607	13.733	15.259	12.207	11.292	17.09		7.324	12.207	7.629	7.324	8.24	15.869		17.09	15.564	16.479
56.4	245.2	14.7	111.3	873.1	557.4	1258.4		87.1	1399.9	38.4	27.2	12.4	46.3		281.4	467.7	391.3		51.8													9.766	9.155	8.24	11.597	11.292	24.414	12.817		15.564	10.071	13.428	9.766	7.019	11.292		12.512	11.597	16.785
86.8	223.4	71.5	59	184.4	265.3	614.6		30.8	52.7	63.9	103.6	11.9	274.1		70.8	213	978		452.4													12.817	18.921	51.27	7.324	9.46	10.681	7.324		7.629	8.85	8.85	9.155	11.292	10.986		15.564	8.85	17.7
38.9	54.5	129.2	45.1	212.8	236.5	58.2		489.7	124	172.4	857.6	70	133.1		127.5	144.7	2287		51.6													43.03	23.499	11.292	25.94	7.324	9.766	41.199		15.259	8.85	10.376	7.324	18.616	17.09		14.038	10.681	13.428
24.1	338.1	17.6	92.5	161.4	415.6	488.1		144.1	93.8	78.8	131.5	127.8	250.5		735.1	11.3	246.1		33.4													22.278	7.019	15.259	7.324	7.629	7.324	11.292		15.259	15.259	8.85	17.7	15.564	14.343		7.935	9.766	25.94
200.8	152.3	1.4	120.9	77.3	100.9	638.4		308.1	141.4	245.5	314.3	268.2	242.6		464.8	180.7	378.9		1144.3													17.395	10.986	17.395	19.531	22.888	21.057	8.24		11.292	7.935	9.46	7.935	28.992	17.7		10.071	13.733	16.479
16.2	1124.6	205.7	112.2	456.7	86.2	123.2		339.4	368.2	196.9	80.2	158	492.4		400.8	313.1	303		319.1													29.602	12.512	14.648	8.545	14.648	9.766	10.681		14.648	11.292	9.766	8.545	13.123	18.616		8.24	15.564	15.869
70.9	259.4	283.8	13.4	229.1	317.6	583.3		30	271.1	39.8	125.7	168	114.2		789.5	730.7	330		1606.3													15.564	10.681	23.193	24.719	7.935	8.24	15.564		8.545	18.005	9.766	9.46	7.629	8.545		8.24	9.155	18.311
175	325.4	88.6	168.7	323.1	150.5	824.6		117.1	108.7	812.9	374.2	206.5	239.5		92.6	164.3	250.3		476.5													34.18	7.935	7.629	9.155	6.409	9.155	9.46		6.714	9.766	14.954	10.681	17.395	14.038		8.24	11.902	13.123
237.1	417.8	124.8	163.1	46.5	39.2	706		200.1	321	96.4	42.1	208.1	215.3		522.5	810.8	54		328.2													30.212	8.24	13.428	7.019	9.46	7.324	28.076		6.104	10.986	7.935	18.005	7.324	14.038		11.597	12.512	12.817
36	207.5	260.6	343.1	66.2	237.7	44.5		176.3	2619.7	105.4	134.8	120.9	69.4		0.5	103.2	24.6		413.6													12.207	9.46	7.935	18.311	14.038	11.597	14.038		9.766	8.85	9.155	8.545	10.986	22.278		12.512	10.986	27.466
181.1	231.6	51.8	82.6	78.7	423	609.9		138.2	36.3	212.7	42.9	105.9	91.7		62.7	109.2	698.9		9.8													30.212	7.019	14.343	18.616	9.155	7.935	13.733		11.902	15.564	8.24	7.629	30.823	11.902		11.597	9.155	17.7
26.2	237	137.7	296.4	94.1	296	285.7		478.5	227.8	177.5	59.7	64.1	75.3		74.8	539.6	64		191.3													11.597	15.259	15.564	8.24	13.123	7.935	10.071		31.128	25.024	12.207	8.545	16.785	8.24		10.681	10.986	13.428
35.6	456.7	147.8	346.5	111.7	39.6	302.5		296.3	119.5	51.1	29.7	70.3	243.8		1682.4	369.3	1348.9		68.3													16.479	20.142	10.071	24.719	7.324	9.46	7.019		10.986	16.479	15.564	7.629	10.376	11.597		9.155	9.155	16.785
66.5	19.5	28.4	411.8	467.8	77.3	84.6		247.3	882.4	381.2	144.1	283.6	312.5		486.6	60.9	218.2		122.6													38.452	8.85	13.428	20.142	12.512	8.545	10.071		7.324	10.986	15.259	8.545	10.071	28.381		32.959	8.85	16.785
289.7	525.7	202.9	186.5	142.5	55.9	369.1		46.2	287.8	425.9	28.9	21.4	498.8		879.2	59.9	860.6		994.6													9.766	12.207	10.376	8.545	7.629	10.986	8.24		9.46	15.869	12.207	7.935	9.46	20.752		11.902	8.85	17.09
175.8	133.4	24.8	38.3	754.5	235.4	25.2		341.5	288.5	22.2	330.4	39.3	297.4		25.2	16.9	163.3		428.5													13.428	42.114	23.804	7.019	11.597	9.155	6.714		28.076	11.597	13.123	11.597	7.935	10.376		10.986	8.85	26.855
129	242.4	90.6	33.6	64.8	190	916.3		236.5	32.7	193.1	164.5	275.4	267.4		1407.8	9.1	98.5		191													10.071	14.954	7.019	13.428	17.09	8.545	9.766		14.954	24.719	10.376	7.935	16.785	12.817		48.218	11.292	12.512
18.2	442.3	196.2	27.4	93.4	251.7	254.2		162.2	275.6	547.5	196.4	223.3	130.3		413.9	33.6	191.6		269.3													22.278	7.629	79.651	19.836	6.104	9.766	7.019		7.935	12.817	12.512	9.46	15.869	9.46		26.245	8.85	15.259
126.2	180.6	309.1	1.2	201.9	285.7	31.9		92.8	1014	26.9	136.5	66.6	194.5		19.6	65.7	922		354.5													12.207	14.038	26.855	22.278	25.024	14.648	19.226		6.409	13.123	9.766	7.324	14.648	35.095		25.024	10.986	27.161
78.7	299.5	49.6	294.8	39.5	211.2	1247.9		83.5	294.5	77.8	407.3	513.2	49.5		204.8	141.5	99.1		47.7													20.142	13.123	16.479	12.512	12.512	12.207	8.24		16.174	11.597	7.629	7.629	12.512	10.681		34.79	12.817	12.512
265.1	204.4	139.7	308.7	114.6	744.4	335.7		414.5	1512.2	313.9	296.1	45.7	99.7		102.8	46.2	1066.3		504													10.071	7.324	15.869	17.09	7.019	11.902	10.681		8.545	13.733	9.766	7.935	24.414	13.733		14.343	11.292	25.024
195.3	267.5	108.5	180.5	29.2	340	88.6		78.5	1289.7	98.4	18.1	254	941.9		266.8	112.2	1630.5		399.7													20.142	7.019	20.752	18.616	11.902	10.986	8.545		53.711	23.804	17.09	11.597	20.142	10.681		10.071	9.155	21.362
50.3	197.3	46	374.8	215.2	253.6	896.2		0.9	713	24.8	87	261.2	61.8		134.4	87.2	209.1		148													17.7	10.071	7.629	7.324	10.681	12.512	15.869		56.152	7.935	8.545	9.46	9.46	29.602		14.954	14.648	15.259
143.5	70.2	124.9	31.1	196.2	202.5	161.8		159.3	140.1	210.8	91.1	756.7	234.1		1812.4	19.6	70.4		921.3													17.395	25.33	14.954	8.24	7.019	8.545	7.324		10.071	11.597	12.817	8.24	11.292	25.635		14.343	14.648	19.836
20.6	211.3	170.2	91.6	163.3	158.9	54.6		29.8	1461.7	50.1	295.1	265.2	765.2		534.7	115.9	326.5		568.7													12.207	7.629	12.817	7.019	10.986	22.583	10.681		8.545	12.817	9.155	7.935	18.005	9.155		8.85	9.46	36.011
171.1	121.4	105.1	241.9	493.9	17.1	218.1		460.6	548.7	214.7	547.6	79.5	69.1		96.1	349.4	578.6		26.2													24.109	8.545	21.667	13.123	19.836	10.986	7.629		6.714	22.278	10.681	7.629	8.24	21.057		10.681	8.85	14.343
27.5	252.5	179.8	88	163.2	28.7	186.5		45.1	900.1	305.3	213.4	79.4	717.9		865.1	290.1	273.3		31.3													19.531	7.324	20.142	7.019	9.766	8.24	6.714		16.174	18.921	9.766	18.616	8.24	28.992		8.24	9.46	25.33
56.5	152	31.1	27.7	325.1	200.7	312.6		241.6	173.5	134.9	282.8	445.2	280.6		435.2	87.2	711.8		408.9													16.174	6.714	26.855	8.24	14.343	21.362	16.174		10.681	7.935	12.207	7.935	7.629	25.024		15.259	9.766	17.7
20.9	197.4	126.7	988.4	18.2	85.6	942.1		289.2	301.3	479.6	1033.2	322.7	396.5		333.7	165.3	1338.9		605													14.648	11.597	10.071	24.719	10.376	7.935	10.986		16.479	13.123	8.24	12.817	10.986	8.545		8.24	10.071	19.226
61.4	209.5	67.1	120	353.1	36.1	90.1		115.8	1092.5	198.6	117.4	86.5	97.8		47.9	453.4	122.2		626.9													13.733	7.935	19.531	7.935	8.545	7.629	6.714		28.076	13.733	29.297	10.986	17.395	14.954		26.245	9.155	19.836
132.4	220.6	70.9	39.3	102.7	943.4	152.6		284.5	2635.7	183.4	264.7	96.8	696.8		165.1	98.7	1.3		75.4													13.123	10.681	21.973	10.071	7.935	16.785	9.155		6.104	14.954	15.564	7.629	15.564	13.733		9.766	9.155	20.142
77.4	583.1	88.5	58.3	217.7	247.9	385.4		179.4	175.6	81.4	408.2	431.7	695.7		1.9	340.8	637.5		143.6													18.005	6.714	13.428	20.142	12.817	14.954	6.714		18.921	9.46	9.155	7.935	10.376	24.414		14.038	11.597	17.09
169.7	50.4	407.9	143.2	88.1	103.9	51.4		139.2	160.6	385.6	367.1	271	711.3		848.2	55.6	560.5		485.2													14.648	13.733	14.954	19.836	8.545	12.817	7.935		25.024	10.071	10.681	13.428	8.85	7.324		10.986	10.681	13.123
34	558.3	195.8	90.4	461.6	164.4	2097.9		89.7	548	26.6	136	224.8	19.4		138.1	223.5	532		91.6													19.226	7.629	23.499	8.85	10.681	8.24	7.019		14.648	11.902	14.954	10.681	11.292	16.174		12.207	14.038	18.005
245.8	2083.8	151.7	29.1	128	509.3	1073.6		71.5	193.5	188.7	666.1	63.1	800.8		402	241.3	644.3		539.2													14.648	7.629	15.564	7.629	18.311	10.376	12.207		12.817	16.174	10.986	7.629	14.343	15.869		7.935	11.292	20.447
348.7	95.8	129.1	54.2	77	571.6	255.4		78.5	1111.8	103	174	91	105.1		57.8	177.2	230.6		50.6													24.719	18.311	7.019	17.7	11.902	10.376	10.376		25.024	16.174	15.564	7.629	17.09	7.629		39.978	9.155	12.512
93.5	506.2	254.5	195.2	51.4	222.4	841.5		35.1	1693.6	207.2	429.4	626	144.2		510.3	98.9	116.4		259.5													11.902	10.681	34.79	9.46	7.935	9.46	13.733		8.545	8.85	9.766	7.629	9.155	15.259		10.376	21.362	13.123
72.2	140.6	41.9	137.9	129.4	87.1	1316.9		89.6	443.8	85.7	35.4	202.7	47.6		612.5	620	1044.3		433.5													10.071	13.123	11.292	11.292	14.648	8.85	10.376		12.207	11.597	8.545	11.902	20.752	30.518		10.376	9.766	21.362
201.7	154.1	24.7	209.9	87.5	195.8	1179.9		638.9	316.8	538	89	415.4	82.6		300.7	50.4	761.4		106.7													28.381	21.667	23.499	7.019	8.85	7.935	9.46		8.24	10.071	15.259	7.324	7.019	13.428		7.935	14.038	13.123
67.3	133.2	126.6	38.8	68.2	450	89.9		684.8	195.6	72.2	433.1	266.4	111.6		250.1	267.2	106.6		985.7													24.719	14.343	41.199	10.376	10.071	9.46	11.902		26.245	12.207	8.24	20.142	7.324	28.076		13.123	13.733	20.447
52.8	318.5	90.9	129.9	102.8	578.9	740.4		35.2	208.7	177.2	100.5	2.3	171.4		1083.7	1183.1	72		505.8													21.362	11.292	15.259	16.479	11.292	8.24	8.85		12.512	9.766	13.733	16.174	9.46	7.019		13.428	8.85	15.259
30.3	134.2	105.9	47.3	442.1	240.8	115		34	84.6	968	45.6	40.8	61.2		1184.3	110.8	74		998.3													24.414	7.629	17.395	15.564	21.057	30.518	11.292		7.019	10.681	9.766	20.142	19.531	20.752		28.076	12.817	13.428
44.8	394.8	98.9	59.1	394.8	172.3	183.4		184.1	522.3	295.3	372	313.2	473		83.6	94.6	504.1		80.2													23.499	14.343	13.123	10.986	12.207	8.85	8.85		7.019	11.902	8.85	9.155	8.24	11.597		8.24	12.207	12.817
12.7	117.2	139.4	66.3	160.7	68.3	716.3		156.9	870.8	111.8	260.8	879.6	173.7		65.8	343.6	91		24													13.733	8.545	21.667	9.766	7.324	8.24	8.545		31.738	8.85	19.531	14.954	11.597	10.681		9.155	15.259	14.038
110.5	73.4	87.9	83.2	321.2	576.7	574.1		60.4	169	16.6	253.2	229.8	549.1		116.9	15.6	227.1		550.7													10.986	8.545	15.259	14.648	9.46	10.986	7.324		10.376	11.292	11.292	7.935	15.564	12.512		7.935	8.85	26.55
127.8	524.2	159.3	36.1	182.1	145.7	379.6		116.1	194.5	330.6	1032.9	42.9	506.5		71.3	303.3	48.3		79.8													13.428	15.869	18.311	9.155	10.071	10.376	7.935		6.409	8.545	7.935	8.545	11.597	16.785		15.869	14.343	17.09
84	74.5	93.3	274.7	177	50.8	650.8		50.5	1526.4	66.5	22.4	92	326.3		1874.7	17.2	173.2		249.8													21.362	28.076	14.954	23.499	10.071	14.648	8.24		28.076	12.207	11.292	7.324	9.155	12.817		10.986	10.071	14.343
287.7	47.5	113.1	484.5	507.7	267.6	514.3		420.8	731.7	29.9	128.8	11.5	1086		271.5	150.4	16.6		1151.9													16.785	9.766	8.24	13.733	20.142	10.376	7.019		8.545	13.123	9.155	7.629	9.766	32.349		12.207	9.46	22.888
529.7	363.6	13.2	419.2	405.9	235.8	190.5		72.1	61.2	26.1	292.2	702.6	419.3		164.7	13.6	8.4		468.6													12.817	12.817	13.428	21.362	6.409	7.935	12.512		6.104	21.057	8.85	10.071	10.681	7.935		8.85	9.766	15.259
60.7	162.2	102.3	83.1	25.2	166.5	618.4		274.2	1040.9	11.9	59.5	95.2	30.9		258.4	304.3	199.2		465.8													22.583	6.714	10.376	6.714	10.071	17.395	8.85		22.583	10.071	8.85	12.207	7.935	15.564		10.376	12.207	15.564
48.6	171.4	13.4	42.5	76.5	69.2	311		48.1	1305.3	46.6	180.9	243.3	40.5		325	451.3	180.6		195.7													16.479	9.766	10.681	8.85	6.409	9.155	8.85		6.714	15.259	9.766	8.85	14.038	7.935		8.85	10.376	14.954
27.6	160.2	47.9	85.2	292.7	80.4	180.2		870.5	382.3	201	51.5	196.6	242.7		344	454.7	19		452.7													23.193	8.545	12.512	18.616	10.986	11.292	11.597		8.85	14.343	10.986	8.85	7.629	28.687		12.512	9.766	22.278
31.7	463.4	190.8	668.9	77	75.5	875		144	65.9	152.1	610.8	141.1	1278.1		29.4	26.5	209.4		37.9													9.46	8.85	21.667	10.986	6.409	9.155	8.545		25.024	20.142	7.935	9.155	8.545	13.428		8.24	11.292	12.512
137.4	97.6	82.8	134	267.3	109.1	75.3		702.3	1458	147.1	233.7	87.3	402.7		294.4	181.2	77		120													14.038	8.24	32.043	25.33	6.104	14.648	10.071		8.24	18.616	10.376	8.24	9.46	12.817		15.259	10.681	12.817
87.4	66.8	117.7	70.7	394	276	660.9		172.3	1103.7	57.1	145	169.4	142.8		786.5	32.2	902.4		79.6													11.597	10.376	44.25	7.019	12.207	25.024	10.681		7.629	11.902	7.629	10.071	9.155	14.038		22.888	14.038	13.428
107	748.2	90.3	192.5	132	115	327.4		99.4	1419.9	572.3	230.1	326.3	293.4		2138.7	8.7	193.7		71.9													10.071	17.395	14.648	8.85	12.512	9.155	44.861		7.019	9.766	7.935	9.46	12.512	8.85		11.292	10.376	13.123
23.5	47.3	178.1	77.9	220.4	239.8	201.3		260.6	1101.7	100.5	272.7	114.7	234		44.3	31.2	1405		304.1													9.46	9.766	9.766	9.46	22.888	8.24	11.292		8.85	12.207	9.46	8.85	11.597	7.324		11.597	10.071	12.512
20.9	65.2	206.6	15	203.5	559.1	143.7		53.2	186.2	116.5	688.5	24.9	38.2		1.6	147.7	400.5		632													32.043	11.292	7.324	10.071	7.935	7.324	11.292		18.616	9.766	9.766	9.155	30.212	31.738		15.564	9.155	19.531
87.5	339.2	294.8	461.1	201.7	423.3	392.4		612	747.4	248.5	402.9	35.7	24.1		100.7	37.9	128.2		811.9													21.667	11.597	13.733	10.986	6.409	7.629	8.24		8.545	20.142	7.935	12.207	18.616	25.635		15.564	11.292	15.259
19.8	67.4	199.1	158.2	243.6	67.9	1695.3		333.8	299	581.4	99.8	53.1	217.6		485	6.8	643.9		165.7													23.499	11.292	14.343	9.155	10.986	7.324	6.714		6.104	17.7	11.597	10.681	17.7	22.278		11.902	12.207	14.343
46.2	338.6	22.3	48.8	547.8	331	1195.8		275	1561.7	49.2	172.5	262.3	740.1		335.3	99.7	269		97													13.733	8.85	19.836	8.85	23.499	15.259	8.24		13.123	10.376	9.766	9.766	14.954	32.654		8.85	9.155	14.648
72.8	142.3	32.1	180.4	76.9	23.9	947.7		185.3	628.6	86.6	16.2	47.3	153		1104.1	40.9	140.1		35.3													10.071	7.629	28.687	9.155	10.681	11.597	10.986		7.019	11.292	14.954	12.207	14.954	19.836		8.24	9.766	20.142
374	622.1	171.5	64.1	483.2	63.1	289.3		687.2	104.2	651.1	154.8	42.4	616.9		240.3	92.6	380.2		1138													10.681	21.057	11.292	10.986	7.324	7.324	15.564		13.428	18.616	9.46	11.292	12.207	17.395		9.155	9.46	12.817
222.2	208.8	17.9	201.1	376.6	595.1	1731.5		532.7	278.6	171.4	76	180.8	304.1		1218.4	19.1	237.6		207.9													17.7	21.362	7.324	32.043	10.376	8.24	6.714		6.409	13.428	16.174	13.123	20.142	10.071		11.902	9.155	21.057
72.3	439.8	51.3	326	123.4	340.5	84.5		152.7	405.8	964.9	364.5	26.5	315.8		152.9	33.9	117.7		495													12.817	14.343	43.03	8.85	13.428	10.986	8.24		8.24	9.766	14.343	9.46	8.85	15.869		25.635	11.597	24.719
162.8	180.4	53	95.3	173.7	340.2	638.7		33.1	258.6	155.4	69.6	154.1	35.4		373.2	57.8	549.5		261.6													16.785	10.071	40.283	27.771	8.24	8.85	10.071		7.019	9.766	7.935	13.123	13.123	8.85		11.902	10.376	23.804
133.1	525.2	867.2	106.2	70	301.1	641.1		244.8	387.6	474.9	493.2	42.3	42.5		16	135.9	1003.7		440													22.583	16.785	13.428	8.24	8.85	9.46	12.817		9.155	14.343	18.005	9.155	20.752	18.616		12.817	10.986	20.447
422.8	14.7	155.2	153.3	800	85.8	37		163.4	809.8	247.6	560.8	97.2	335		236.9	28.4	101.1		199.3													11.292	33.875	8.545	8.85	7.629	15.259	8.545		11.292	9.155	11.902	8.24	9.766	10.071		10.986	9.155	13.428
92.2	61.9	156.5	135.3	88.8	202.7	482.4		211.3	477.6	91.9	865.3	489	482.9		86.5	27	1073.2		546.1													14.648	12.207	14.343	6.714	10.071	11.292	9.155		6.104	16.785	7.935	15.259	8.24	13.123		9.46	10.681	14.343
48.6	269.6	53.9	63.7	378	340	358.8		296.4	2112.5	62	358.2	56.7	154.3		42.8	89.8	463.1		36.4													13.733	8.545	12.512	16.174	16.479	8.24	15.564		22.583	14.038	13.123	11.292	16.479	7.629		34.79	8.85	15.869
54.8	90.2	97.6	146	199.7	119.6	526.6		739.5	451.9	49.5	106	98.8	1433.4		260.8	52.2	139.4		263.3													14.038	10.986	22.278	11.902	16.479	7.935	7.324		6.104	15.869	13.733	7.324	10.986	10.071		9.46	9.155	17.09
24.8	240.3	46.4	136.7	512.4	296	284.8		223.4	592	27.6	1077.4	13.6	162.4		146.2	33.7	1154.9		168.4													14.038	11.292	14.343	7.935	6.409	8.85	30.212		13.428	10.071	12.207	7.935	7.019	23.804		12.817	8.85	12.512
359.6	86.5	46.3	64	393.7	71.1	204.2		158.3	311.5	336.9	243.9	158.1	148		129.8	32.9	540.2		799.1													11.597	10.681	14.343	12.207	11.597	13.123	33.264		29.602	13.123	11.902	7.324	10.376	39.368		8.85	11.292	28.687
63.3	410.4	156.4	443	1232.5	265.3	1167.1		941.5	2801.8	502.2	176.4	178.6	101.9		289.7	26.3	2130.2		187.4													19.836	28.381	9.46	11.292	6.409	20.142	11.597		7.629	22.888	7.629	8.85	9.155	7.019		10.071	12.207	25.635
215.1	165.9	14.6	197	995.8	807.8	1401.6		447	368.2	275.9	416.2	262.4	874.9		250.1	127.2	959.3		326.8													25.33	12.207	18.311	9.46	19.226	8.545	9.766		26.245	22.583	13.428	7.324	13.733	14.038		10.376	13.733	18.921
48.1	375.7	57.8	181.3	75.5	372.8	1561.3		695.8	129.3	1138.3	250.1	193.4	616.9		139.2	30.1	214.8		633.6													18.005	9.155	10.376	9.46	11.597	9.766	13.733		24.719	7.629	14.648	9.155	7.629	19.836		25.024	10.681	17.7
247.2	279.5	183.8	39.5	232.7	40	132.8		532.2	363.4	139.1	42.3	169	180.7		989.9	45	1512.6		113													18.311	8.85	18.311	9.46	16.174	16.785	17.7		28.687	10.376	10.071	11.597	20.447	14.038		8.85	12.207	15.869
56.9	73.9	163.8	104.1	105.8	118.4	1073.3		164.8	1026.6	681.2	371.3	399.6	441.4		264.9	46.3	474		125.3													26.855	13.123	10.376	11.902	10.986	16.785	10.071		6.104	32.043	10.071	7.324	8.85	17.395		8.24	12.512	20.752
39.5	204.6	253.8	146.9	192.6	441.8	198		51.8	1625.5	146.9	250.5	334.6	93.3		763.3	25.7	845.4		416.9													16.479	24.719	27.771	12.207	10.376	14.343	8.24		10.071	21.667	11.292	8.545	10.071	13.733		15.564	10.986	28.687
11.3	136.6	25	57.4	308.2	392	348.7		409	166.4	92.3	29.1	280	1471		239.6	76.4	982.4		177.6													9.766	10.681	25.33	17.395	9.766	10.681	7.629		24.414	10.071	7.629	10.986	21.362	9.766		7.935	11.292	15.869
57.4	453.4	58.3	125.1	19.2	462.9	137.8		33.5	155.8	18.4	18.1	382.9	257.7		117.9	333.7	205.7		183.9													9.766	21.973	13.123	14.648	7.324	11.292	8.85		25.33	12.512	14.648	9.46	14.343	21.667		23.804	10.376	21.973
213.5	262.8	25.3	695.3	234.8	81.2	525.7		378.2	152.8	45.7	299.4	137	90.6		477.4	13.1	352.4		397.6													19.836	18.311	34.18	14.343	14.954	10.986	7.935		23.804	16.785	12.817	9.46	19.531	7.019		9.155	12.207	24.719
275.6	57.4	47.3	223.5	173.5	42.8	687.2		207.5	835.3	659.4	400.1	50.4	84.2		831.4	9.5	111.1		496.1													11.902	18.005	11.597	7.324	7.324	7.324	7.629		8.545	11.292	10.681	8.85	13.428	17.395		10.071	11.292	15.869
162	562.5	13.2	165.7	245.8	498.9	62.5		846.7	388.7	1028.7	189.5	124	733.2		378.2	10.2	251.7		299.8													10.071	10.071	13.123	9.766	11.902	7.324	17.09		10.986	15.259	14.038	8.24	14.648	19.531		7.935	8.85	13.428
233.8	525.6	83.6	28.7	197.3	211.5	1.6		115	238.5	331.3	762.8	382.3	41.3		16.7	78.1	81.1		787.8													15.259	14.648	20.142	14.038	8.545	12.207	18.005		6.714	10.986	19.836	9.46	17.7	20.447		9.46	12.207	14.954
39.4	779	50.3	216.4	56.3	329.9	417		260.3	273.2	692.7	415.9	37.3	1581.3		568.4	46.1	236.5		190.2													16.785	40.283	31.738	13.733	6.104	7.935	7.629		8.85	18.616	8.24	9.155	12.817	15.564		7.935	10.681	15.259
119.3	15.1	51.5	66.1	25	122.7	514		186.9	1851.8	226.1	15.7	78.2	891.6		662.5	20.8	258.2		178.6													14.954	9.766	14.648	11.597	10.376	26.55	7.935		14.038	19.836	16.785	18.921	11.292	17.09		10.376	27.161	13.733
8.8	272.2	125.7	423.5	203.3	359.1	129.7		271.3	1474.4	190	139.5	112.5	380.3		875.4	33.1	88		90.9													14.648	10.681	18.311	14.648	13.428	12.817	27.466		20.752	22.888	7.935	8.85	10.681	28.687		8.24	11.597	26.55
58.7	1386.7	114.3	370.7	239.2	1225	97		175.7	131	938.5	363.2	55.4	599.4		56.6	55.5	479		502													15.259	17.395	27.771	11.902	6.409	8.24	9.155		6.104	21.973	17.09	17.7	13.428	29.907		9.46	11.292	26.245
54.6	207.6	120.4	23.3	269.1	70.4	366.7		162.1	496.5	56.7	972.8	26.1	192.4		234	225.1	258.3		771.6													10.071	8.85	24.109	19.531	7.324	11.292	10.376		13.428	17.7	15.869	7.324	10.071	17.7		13.733	10.376	21.362
129.8	27.4	196.4	404.8	392.1	158.1	248.9		174.2	1061.5	233.5	35.6	190.4	236.6		300.4	141.7	618		647.2													25.33	10.376	19.226	7.935	7.019	14.648	11.902		7.324	18.005	14.038	9.766	7.324	20.752		11.597	12.512	29.602
16.9	347.1	26.1	102.8	219.1	300.7	39.2		128.6	177.3	142.1	1403.1	67.3	26.3		178.5	87.3	88.8		400.3													16.174	13.733	7.324	9.766	12.817	8.545	8.24		9.766	10.376	9.155	7.629	10.071	14.343		16.174	9.155	25.33
24.4	296.6	142.5	83.6	135.4	449.6	834		118	79.5	296.3	268.5	263.4	1528.4		99.3	78.2	882.6		352.1													9.766	13.733	30.212	16.479	9.46	9.46	18.921		7.019	9.46	8.24	8.85	9.155	37.537		14.038	9.46	13.428
178.2	329.1	39.9	53.6	95.5	180.6	169.1		296.9	635.3	153.5	118.4	31.9	544.7		204	145.4	227		120.8													12.512	13.123	28.687	18.921	7.935	9.46	18.616		6.714	11.597	11.597	12.817	13.428	20.752		7.935	15.259	15.869
194	137.5	31.7	69.4	33.5	32.4	524.9		220.6	1628.6	189.4	297.9	246.6	1368.2		34.3	224.8	132.6		123.9													21.057	9.766	8.24	7.019	9.766	8.85	11.292		10.071	13.733	7.629	10.681	10.681	21.973		8.85	13.123	24.414
90	193.3	202.9	103.1	428.4	1745.1	577.8		18.4	670.7	572.6	59	128.9	99.4		9.9	434.7	73.7		224.5													22.888	10.071	28.076	24.719	14.343	9.766	11.597		35.095	31.738	14.038	9.155	8.24	7.935		10.071	8.85	12.512
32.9	125.9	54.2	157.5	113	368.1	203.5		220.3	415.6	230.2	65.2	249.7	208.1		270.4	147	488.4		42.9													24.109	21.667	32.349	9.155	6.714	17.09	14.038		9.766	16.174	11.902	14.648	14.038	15.564		7.935	9.46	17.395
118.7	434.2	62.7	81.5	134.3	36.7	109.1		216	472.7	21.1	491.3	128.8	115.5		1630.8	7.2	1158.9		252.4													13.123	22.278	10.986	14.343	11.902	8.24	10.681		7.324	8.24	13.123	14.648	7.019	14.648		9.155	9.46	13.733
204.6	532.3	60.7	136.6	562.4	128.1	1048.2		303	188.9	82.2	356.4	215.3	182.4		166	382.9	965.1		172.6													12.512	15.564	19.531	11.902	10.376	9.766	10.681		8.545	9.46	10.986	7.935	9.766	8.85		12.817	10.681	27.771
66.6	628	77.3	137	558.5	351.8	163.6		430.6	162.9	525.7	149.7	66.4	596.1		134.5	252.5	674.5		286.8													35.4	10.681	19.836	7.324	11.902	7.324	10.376		10.681	12.207	9.46	7.629	9.766	8.85		8.85	11.597	13.123
163.4	203.6	208	11.4	256.1	550.7	369.4		535.6	178.6	179.6	459.1	81.2	102.7		287.8	19.3	686		70.6													11.902	9.46	19.531	7.629	16.785	7.629	11.292		7.324	10.071	9.766	8.85	9.155	13.428		15.869	9.766	15.869
19	210.6	283.5	76.9	85.7	794.4	532.4		18.6	210.2	161.1	142.8	176.6	772.7		53.9	126	186.1		54.7													15.564	6.714	39.673	12.817	10.376	9.766	9.155		8.85	23.499	14.038	8.85	13.428	33.875		11.292	10.071	20.752
139.4	516.5	46.4	55.8	554.4	156.2	620.6		112.6	146.9	108.1	18.9	226	210.3		423.4	72.9	64.8		101.9													14.648	18.616	16.479	15.259	12.512	10.071	12.512		14.648	14.648	24.719	11.597	7.935	11.292		8.85	14.038	14.038
114.2	233.9	11.8	101.5	406.9	238.1	919		835.7	305.7	666.6	520.9	18.4	289.8		71.8	121.5	17.1		359.3													20.142	14.038	17.7	9.155	10.071	16.785	10.376		19.531	18.005	8.24	9.155	8.545	13.428		15.564	10.376	25.635
144.5	183	374.4	57	135	71.3	647.6		39.4	572.1	602.2	340.1	235.3	397.2		674.9	179.8	448.6		384.3													10.376	8.85	11.902	7.629	10.681	21.057	30.823		7.629	15.869	8.24	10.681	12.817	18.005		48.828	9.46	13.733
120.8	842.1	148.4	69.8	316.7	457.9	149.9		212.4	445.1	341.3	1176.8	263.6	786.8		33.4	247.1	1087.2		29													14.038	13.123	9.766	8.85	13.123	11.597	8.24		28.076	14.648	9.46	11.292	16.785	31.738		13.123	13.428	17.09
309.9	118.1	47.1	529.9	45.8	689	366.2		25.1	366.4	304.2	467.2	241.1	447.6		435.5	79.2	1299		71													14.648	29.602	21.362	15.259	7.324	21.973	10.071		10.376	16.479	12.512	9.155	23.804	18.921		9.155	12.512	14.343
129.8	292.1	124.9	38.8	60.4	88.4	340.7		271.1	110.2	96.5	52.8	49.6	216.7		476.3	78.6	1222.2		733.4													16.479	6.714	21.057	13.123	6.409	14.343	21.362		10.376	18.005	16.479	8.24	12.817	11.292		10.681	11.292	15.564
219.3	251.2	40.3	225.7	2.2	174.1	1803		155.6	662	834.8	162	214.4	43.7		269.2	22.6	293.6		106													36.926	10.681	23.499	9.46	10.071	18.311	9.46		6.714	27.771	8.24	14.648	17.395	15.869		21.362	8.85	26.855
245	62.4	79	26.9	72.4	190.5	112.9		280.8	235.8	41.9	260.7	45.9	176.4		406.9	140.6	542.7		176.7													17.395	14.648	13.123	8.24	10.986	7.629	8.85		7.324	15.564	13.428	11.292	12.817	9.766		14.954	9.155	13.123
21.6	66	123.2	302.9	270.7	33.1	1635.7		162.2	831.1	300.5	139.8	195.6	358.6		139.1	154.4	513.8		15.8													20.142	7.019	13.123	10.986	23.499	30.518	14.038		25.635	16.174	23.804	12.207	10.071	24.719		12.512	26.245	12.817
84	506.8	115.3	694.2	99.6	555.7	202.1		24.3	53.5	178.6	140.1	395.6	279.1		77.8	98.7	110		78.2													22.278	9.766	8.24	15.259	11.902	7.935	12.817		16.174	12.817	14.343	15.259	10.071	9.766		14.954	9.46	13.428
85.5	149.6	100.9	238.8	59.3	48.4	43.2		115.8	425.7	162.9	1111.7	363.6	198		1946.9	163.4	192.4		71.9													14.343	33.875	9.766	17.09	8.545	8.24	17.7		16.479	7.935	18.311	8.85	7.935	26.55		15.869	11.597	26.245
62	427.5	379.5	113.3	194.5	471.6	565.9		401.4	586.4	199.8	201.9	180.9	122.4		3143.9	216.4	476.4		229.6													12.512	9.766	9.766	9.155	9.46	10.071	7.629		9.46	7.324	10.376	8.85	16.785	18.311		12.512	10.376	12.512
383.5	214	101.6	37.2	240.1	87.9	287.9		137.1	403.1	535.2	91.9	312.1	439.8		322.8	10.2	1209.6		557.2													9.46	16.174	20.752	8.545	10.376	9.155	7.935		10.071	11.292	8.545	7.935	22.278	12.207		19.531	10.071	14.343
294.7	705.7	101.6	282.2	225.5	155.6	507.5		244.1	231.2	639.7	405	32.8	152.7		233.9	62.9	586.6		278.4													14.038	11.292	8.24	7.629	9.766	38.452	13.428		7.019	12.207	17.395	11.902	10.986	28.076		11.597	17.7	26.55
256.7	72.7	19.2	52.6	89.1	475	1617.8		941.8	178.4	322.2	107.3	184.8	1035.4		24.4	93.1	459.1		325.8													10.376	20.142	18.921	10.071	12.817	10.681	9.155		7.629	25.33	9.155	7.324	18.921	22.888		12.817	10.681	13.123
55.2	773.8	18.7	58.7	68.1	237	105.2		898.3	194.3	407.2	239.8	591.9	153.8		137.5	51.9	284.4		35.7													10.071	16.174	7.324	13.428	13.428	16.479	7.935		6.714	12.512	7.935	8.545	7.935	17.7		21.362	10.071	16.479
81.7	157.3	232.3	46	180.9	747.9	730.1		31.3	419.3	586.9	156.6	175.1	829.8		374	309.1	756.5		372.4													22.278	7.629	11.597	8.85	11.597	11.597	12.512		13.123	16.174	13.123	8.85	23.193	16.174		30.518	9.155	16.174
33.7	184.9	79.7	23.1	108.3	299.4	166.7		187.4	1163.9	60.9	398.9	117.5	47.2		117.6	7.6	637.5		261.2													12.817	15.259	16.174	19.836	7.629	9.46	13.123		6.409	15.259	23.193	11.902	13.428	9.766		15.869	10.376	14.038
44.1	577.9	15.1	51	206.7	231	622.6		1149.1	1317.8	83.9	224.1	172.7	330.2		59	262.4	987.1		36.8													10.376	16.785	13.123	14.648	11.597	17.09	7.324		38.757	16.174	7.629	9.155	10.986	17.7		10.376	8.85	14.648
50.9	122.7	109.4	115.8	255.9	610.8	214.5		422.2	476.3	30.4	294.3	130.1	251.3		27.7	571.7	818.3		90.7													11.292	9.155	9.766	19.836	7.935	15.259	8.24		6.104	10.376	12.207	9.155	11.597	14.038		8.24	10.376	22.888
74.8	311.9	76.8	30.9	283.8	1366.7	1101.3		448.7	305.8	100.6	214.7	259.1	23.6		194.4	675.5	137.9		104.8													11.902	13.123	7.019	9.155	6.714	8.85	7.324		6.714	21.057	7.629	10.986	16.785	16.479		18.311	9.46	12.512
98.2	117.6	98.4	46.2	73.5	165.2	868.8		231.5	143.8	1553.4	613	225.5	183.2		256.6	37.6	317.1		517.5													15.869	20.447	6.714	17.395	11.597	14.954	8.24		30.212	15.259	16.479	7.629	21.973	27.466		7.935	9.155	14.648
47.3	440.4	138.7	124.7	364.1	878.1	43		184	362.7	339.3	297.9	205.3	337.2		1747.4	203.6	206.4		318.3													16.174	8.85	6.714	11.292	23.499	9.46	9.46		8.545	7.324	11.597	7.324	15.869	22.583		10.376	9.46	21.667
417.1	48.8	244.4	18.3	277.5	53.9	103.3		89.7	370.9	929	152.2	326.7	185.1		405.7	428.5	243.6		104													10.681	9.155	21.973	7.324	16.785	13.123	10.071		13.733	17.09	8.85	11.292	18.921	8.24		10.681	8.85	12.512
19.2	597.2	63.6	8.7	104.3	641	1310.9		631.8	118.5	1033.1	519	78.8	32.2		136.6	77.9	458.8		244.2													14.343	17.09	16.479	20.447	7.629	9.155	7.629		6.104	17.09	18.005	9.766	33.875	11.902		13.733	10.376	15.869
98.9	838.6	261.2	406.7	201.8	288.8	1173.8		137.3	190.4	148.3	77	160.2	217.8		141.6	137.2	935		261.2													20.142	11.597	7.935	19.226	15.259	23.804	7.019		14.343	17.7	10.376	10.071	7.019	7.935		8.545	9.766	51.27
30.3	871	290.1	443.1	30.3	821.4	251.6		851.6	145	392	266.3	104.2	130.7		187	347.4	488.2		91.8													10.071	8.24	8.545	15.564	14.954	13.733	18.616		7.019	12.512	16.479	10.986	11.597	7.019		12.512	10.681	12.512
73.6	101.7	119.9	36.5	600	1322.7	76.9		385.5	1160.3	199	283	203.9	169.5		811.2	132	31.8		156.7													17.7	8.24	14.648	6.714	12.817	11.597	7.019		8.24	24.414	17.395	12.817	10.071	17.395		10.071	15.564	13.428
200.6	227.8	94.5	127.5	561.5	48.5	884.4		426.9	270.2	1003.1	32.7	116.1	490.2		535.1	1.2	50.4		237													18.921	9.155	17.395	7.324	6.714	12.817	7.935		6.104	14.343	10.071	27.161	17.7	9.766		11.292	20.142	18.616
29.9	41.4	65.1	41.6	71.7	777.7	629.9		124	345.6	1538.4	322.6	363.9	25.2		1157.5	276	272.7		188.1													17.395	23.499	15.564	15.259	6.409	13.123	8.85		12.207	13.428	11.902	10.986	13.428	22.888		14.954	10.071	16.479
16.3	30	140.6	170	306.3	439.1	256.8		38.5	888.2	56.1	189.9	116.3	59.6		2305.1	169.6	280.8		327.2													14.954	17.09	15.564	19.836	7.324	10.681	7.935		7.019	7.629	13.733	8.545	13.733	7.935		11.292	9.155	35.706
178.8	16.4	139	28	74.4	323.4	2325.6		128.9	372.8	286.2	28.2	116.6	934.8		61.4	34.5	27.3		656.6													16.785	13.733	6.714	15.259	7.019	13.428	9.766		7.324	16.174	9.766	11.597	13.428	35.095		13.428	10.986	21.362
12.9	207.1	226.7	133.6	45	141.6	12.3		181.6	112.3	783.6	111.9	302.4	106.7		571.3	787	26.6		659.8													11.292	13.428	17.395	18.311	26.245	7.935	7.019		13.428	22.278	7.629	7.629	15.564	15.869		22.888	8.85	18.311
115	537.6	222.7	55.2	212.6	118	2373.7		156.2	779.4	744.8	200.2	205.4	57.1		429.4	908.7	50		513.9													14.038	7.324	7.324	9.155	15.564	14.954	12.512		6.714	16.174	8.545	11.902	13.123	10.071		14.648	9.46	17.395
73	1024.1	27.7	0	21.5	390.1	1123.8		44	73.6	746.3	247.2	40.8	104.8		512.9	333.3	1202.6		334.2													24.109	9.46	7.629	9.155	8.545	25.94	7.935		13.123	9.155	10.376	11.292	8.24	14.648		8.85	8.85	14.954
200.9	361.2	44.2	178.9	278.2	81.7	927.3		58.6	38.2	229.7	243.1	142.9	88.9		13.8	914.3	214.5		23.8													19.226	15.869	8.24	9.155	24.414	9.766	11.902		16.479	7.935	12.207	8.85	10.681	21.973		13.428	11.597	18.921
66.7	334.3	26.7	122.1	70.5	144.6	1320.6		42.4	62.4	1156.4	878.6	145.8	486.2		53.3	176.4	296.1		126.9													10.681	13.428	11.902	7.019	8.85	8.24	8.545		13.428	10.071	10.681	16.479	24.414	21.667		9.46	10.986	35.4
68.3	167.7	84.5	33.1	854.7	873.2	314.3		554.6	172.4	236.4	219.4	72.3	415.2		29.6	68.8	165.2		130.4													14.038	8.545	13.428	10.681	18.311	12.512	10.986		13.123	11.902	15.869	7.935	36.011	21.973		8.545	12.512	16.174
28.6	122	507.3	152.2	322.3	150.4	2777		54.8	352	928.6	29	466.4	573.9		460.2	287.6	61.3		87													31.128	7.019	8.24	6.714	8.24	19.531	8.85		11.902	18.616	11.292	11.902	19.226	7.935		10.071	14.038	12.512
109.7	370.8	16.7	50.8	195	163.4	788.1		97	1	316.3	298.3	56.7	83.9		275.8	340.4	1177.2		314.2													9.766	13.123	7.935	12.512	22.888	8.545	7.019		36.011	19.226	10.376	8.85	18.311	36.316		9.46	12.207	16.174
109.7	142.8	63.4	37.4	87.1	308.9	225.2		135.9	303	166.7	178.1	100.5	369.5		426.4	39	416.7		135													11.292	10.071	25.33	10.376	7.324	15.259	7.019		6.104	8.85	16.174	9.46	9.766	7.019		9.155	8.85	15.564
33.6	89.5	218.5	112.7	191.6	1100.2	112.8		155.8	100.3	224.6	612.6	498.1	58.7		2633.9	95.3	95.7		10.5													10.376	8.545	25.94	10.376	7.935	8.24	7.019		8.24	7.324	17.09	8.24	8.24	13.428		18.005	21.973	15.259
80.9	32.5	57.7	816.4	430.1	45.2	66.6		118.6	44.8	70.2	372.8	20.5	965.4		1028.5	308.3	270.4		62.5													19.836	15.259	20.142	8.24	9.155	14.648	10.986		6.714	9.766	9.155	8.24	7.629	27.771		8.85	9.766	15.564
250.1	84.7	131.7	307.8	219.9	1183.2	399		135.7	530.4	129.5	52.2	49	1364.1		520.3	30.7	590.7		176.3													11.902	13.123	15.259	7.935	9.155	7.324	9.766		6.104	10.071	7.629	7.935	7.019	23.804		12.512	9.155	19.531
47.8	540.2	134.3	47.2	47.9	514.6	65		735.5	998	913.3	275	384.8	811		916.4	18.9	117.2		839.3													13.428	7.324	10.071	9.46	8.545	9.766	16.174		25.635	15.259	8.24	8.545	21.362	10.986		23.193	9.46	12.817
17.3	133.4	22.4	148.1	182	268.8	725		21.1	251.9	273.9	293.3	98.7	126.1		821.9	25	1185.4		996.6													9.766	10.071	32.654	15.564	14.038	16.174	19.226		6.409	10.986	10.376	8.545	13.428	32.043		9.46	10.376	22.278
199.3	153.6	143.3	145.4	79.6	194.8	871.3		154.8	139.4	559.8	32.3	214.2	477.9		171.4	170.5	250		373.5													11.597	7.324	28.381	7.019	9.155	11.902	15.259		7.324	14.038	10.376	11.902	21.057	7.324		11.902	11.292	16.174
129.9	125.1	166.3	123.3	132.9	194.5	354.4		472.4	337	642.1	41.2	342.4	364.7		647.9	151.7	512.3		264.8													12.817	18.616	17.09	10.071	8.545	10.681	10.681		19.226	8.545	10.986	13.123	11.597	8.24		8.85	11.292	18.311
135.8	146.2	130.6	50.2	178.3	1166	1254.7		75.9	54	319	143.5	73.8	328.4		238.5	20.2	262.6		538.9													9.766	7.935	17.09	9.155	14.648	10.071	6.714		21.362	15.564	17.395	11.902	31.738	10.071		11.597	9.155	15.259
249.4	147.3	141	113.2	47.3	251.8	265.4		176.5	199.2	551.5	536.3	136.3	248.6		580.1	10	68.5		308.1													13.123	11.902	7.935	8.545	6.714	7.324	35.095		7.019	7.629	7.935	10.986	15.564	11.292		9.766	9.46	15.869
140.9	188.5	112.3	27.6	21.2	115.4	1337.4		67.1	780.9	44.2	1187.4	643.3	3409.8		316.8	61.7	55.5		300.7													9.766	12.207	9.46	15.564	16.174	19.836	12.512		30.518	9.766	10.071	10.376	11.292	11.597		11.597	10.681	19.531
92.5	25.9	104.6	15.7	161.8	141.5	701.8		106.5	79.5	136.7	135.7	177.9	302.6		221.4	75.9	214.1		65.8													23.193	13.428	57.068	7.019	12.207	16.785	18.616		10.376	17.09	8.85	11.902	7.935	7.629		12.817	10.071	20.752
70.2	137.6	30.5	27.5	179.2	384.7	1408.6		160.9	501.5	228.3	881.2	66.8	211.3		24.5	203.6	688.5		77.9													18.921	24.414	21.667	14.038	10.681	23.804	36.926		8.85	14.038	9.766	8.85	12.512	23.499		9.155	9.155	16.479
134	467.9	134.1	583.5	221.6	33	1810.8		189.1	331.1	355.4	103.9	249.1	0		406.4	180.7	222.4		628.3													13.733	8.545	19.226	10.071	9.46	8.85	7.019		6.409	15.259	7.935	7.935	8.24	23.499		21.667	8.85	15.259
50.7	92.3	75.2	110.1	535.1	21	120.4		71.9	971.9	1506.9	283	119.5	596.9		1344.1	561.9	1843.4		53.9													21.057	8.85	11.597	9.766	13.428	10.681	15.564		9.46	15.869	19.531	7.629	7.019	12.817		10.681	8.85	23.499
71.7	210.3	88.9	46.4	131.8	31.4	480.4		372.2	2114.3	38.3	187.6	161.5	715.9		614.5	56.5	292.2		167.3													17.395	30.518	18.616	19.226	6.409	13.428	28.381		25.635	15.564	8.24	15.564	7.019	12.817		12.512	12.817	21.362
324.1	811.1	86.2	106.1	461.5	248.7	1617.8		375	323.9	199.7	215.7	274.1	158.3		1924.8	37.7	149.5		303.2													18.005	18.616	18.616	11.597	10.681	7.629	13.428		7.629	9.155	19.836	7.935	16.785	10.681		7.935	8.85	19.836
13.6	20.9	46	370.5	323.4	910.9	1253		100.5	85.7	454.5	207.1	560.1	368.1		684.6	32.8	263.3		266.9													12.817	9.766	28.687	8.85	13.123	9.766	8.85		6.409	9.46	13.123	10.071	9.766	7.935		15.259	9.766	18.616
7.5	255.7	38.2	858.5	297.3	309.6	335.7		657.6	142.3	219.8	61.1	216.4	1117.5		1	80.7	1075.6		1106.8													19.836	26.855	16.785	13.428	23.193	15.564	8.24		7.019	7.324	17.7	10.681	15.259	10.681		18.005	13.733	18.311
126.7	74.4	27.4	319.8	308.2	173.2	106.5		51.5	60.7	47.1	542.6	350.5	93.5		834.5	27.7	425		375.8													34.18	21.362	15.564	8.24	18.005	9.155	7.629		25.635	8.85	8.545	7.324	7.324	9.766		8.24	9.46	12.817
168.3	180.6	17.7	103.3	458.9	419.3	448.1		63	1087.7	1063.9	19.2	205.2	604.5		107.2	60	548.1		187.1													12.512	10.986	15.564	7.935	7.629	19.226	9.46		23.193	12.207	8.85	10.986	7.324	15.869		10.681	11.902	14.038
220	104.8	110.2	234.9	256.1	218	436		250.7	759.3	23	267.4	220.9	28.6		525.6	168.5	662.5		644.3													24.414	36.316	6.714	12.512	7.019	7.324	7.629		21.057	8.85	15.564	10.681	8.85	10.681		10.376	9.155	27.161
35.2	527.5	47.5	309.3	87.2	98.8	156.6		320.9	187.2	217	866.9	158.9	420.1		235.7	126.5	36.6		212.3													10.986	14.038	38.757	8.85	8.24	14.343	23.804		7.324	13.733	15.564	10.986	12.817	7.019		8.545	13.428	12.817
113.7	456.2	58.6	16.2	59.1	247.4	182.1		255.1	100	19.8	56.1	151.1	18.8		930.7	13.3	58		52													9.766	11.597	10.986	17.09	9.155	8.545	40.894		7.324	14.343	7.629	7.629	22.888	7.324		14.343	9.766	19.836
31.6	533.3	44.3	24.1	457	295.6	1386.6		247.2	43.1	226.4	84	125.6	444.8		1003.8	29.5	62		69.2													13.733	7.324	61.34	7.935	10.071	8.85	9.155		11.292	15.259	8.24	10.986	11.902	14.343		11.902	9.46	22.278
53.6	124.2	82.8	188.4	216.7	1205.6	709.9		582.4	1.6	281.6	1150.3	378.4	364.6		127.7	101.6	118.4		433.7													12.512	45.166	12.817	9.766	6.409	7.629	7.324		6.714	22.583	10.986	7.324	11.597	31.433		8.545	11.292	24.719
75	126.8	41.5	83	171.8	256.1	47.7		32.4	430.4	423.4	248.6	58.9	940.7		462.9	261.6	250.2		316.5													13.123	21.057	31.128	7.019	8.85	14.343	10.376		11.597	14.343	8.24	9.155	21.362	9.46		9.155	11.902	20.447
124.7	183.4	49.2	186.5	126.3	232.4	203.6		135.5	712.2	491.3	203.8	49.4	896		586.2	170.9	994.9		130													35.706	12.512	31.738	14.648	9.46	13.428	30.212		7.629	15.259	13.428	14.038	15.564	58.289		11.292	8.85	12.512
52.2	88.5	107.3	578.7	260.5	398.5	258.7		836.3	846.2	266.4	180.7	202	457.2		576.1	14	211.2		463.5													12.817	6.714	20.752	7.324	19.531	8.85	8.85		26.245	10.986	14.343	14.648	25.33	13.428		9.766	9.766	27.161
180.8	213.9	212	178.5	124.1	782.7	501.3		168.8	589.3	505.6	36.7	40.2	479.4		43.1	205.2	215.2		65.1													17.7	16.785	6.714	9.46	10.681	16.479	15.564		6.104	11.597	8.85	9.766	11.597	17.09		14.038	10.376	12.817
40.1	522	309.3	731.2	381.8	836.4	234.1		313.3	288.7	182.2	83.9	84.7	160.7		46.2	396.7	246.7		290.6													25.33	14.954	7.324	37.537	19.531	14.648	7.629		6.714	33.875	7.629	8.545	11.597	14.038		14.648	13.733	21.057
14.8	225.6	168.2	470.4	47.9	143	288.1		111.9	1969.6	502.8	40.2	19.1	1135		80.1	266.6	1050.1		590.7													21.973	15.564	12.512	8.24	9.155	8.85	20.752		7.019	8.24	16.479	11.597	12.817	9.46		10.681	10.376	39.978
58.7	130.5	138	24.4	85.2	132.4	80.1		24.9	387.3	459	347.8	26.5	301.7		452.9	64.6	246.5		39.5													12.817	9.46	8.545	13.733	14.648	10.071	10.986		25.635	17.7	10.681	7.935	14.343	9.766		33.264	10.071	12.817
52.1	310.7	106.6	20.3	143.9	590.6	89.3		1.4	928.8	676.3	154.8	65	604.1		482.4	14.3	1.3		73.6													11.292	10.681	39.368	7.324	10.986	17.7	11.902		27.466	21.973	7.629	8.24	8.24	10.071		8.24	14.648	17.395
14.3	126.7	47.3	249.1	127.7	229.5	1049.1		69.4	647.3	521	1033.6	53.2	489.1		874.8	876.7	501.4		546.2													13.733	20.142	14.038	12.512	8.24	11.597	7.019		6.714	15.869	15.259	8.24	13.428	19.226		8.85	9.46	31.433
208.2	33.8	125.5	11.3	86.3	264.6	1588.9		110.8	82.3	843.5	242.3	45.3	56.4		644.5	64.2	96.2		34.8													14.038	25.94	9.46	10.376	10.071	13.123	10.681		6.104	18.616	8.545	11.902	9.155	8.24		7.935	16.785	14.648
719.8	330.1	13.7	114.1	105.3	301.3	1628.1		313.5	343.1	113.5	38.5	457.9	431.4		1509.2	26.7	101.2		191.2													35.706	36.621	16.479	9.766	14.343	28.076	9.155		7.019	26.55	10.071	9.155	21.057	7.324		20.752	9.155	21.057
143.1	458.5	213.8	59.5	316.9	316.8	1341.4		3	185.5	1625.2	69.9	280	253		1360.8	24.9	384.4		213.7													10.681	8.85	33.875	9.155	8.545	11.597	39.673		11.597	14.038	19.226	10.681	21.362	10.681		8.24	8.85	21.057
228	286	39.8	320.7	26.5	115.7	38.1		216.8	194.8	634.6	1454.1	77.9	729.6		1021.5	629.6	42.8		339.3													22.278	14.343	11.597	8.24	10.376	13.123	6.714		11.597	24.414	8.545	9.46	15.259	9.155		11.292	13.428	21.362
208.4	890.1	144.2	45.4	128.5	177.1	737		910.8	246.4	148.5	1100.5	94	164.4		1282.8	39.3	193.3		341.9													15.869	8.545	7.629	15.869	13.123	9.46	10.376		6.104	7.935	10.071	7.324	12.512	22.278		11.902	10.681	16.479
37.4	1258.9	119.6	50.6	84.1	307.4	84.1		1179.4	63	22.2	148.3	486.9	700.3		322.4	294.2	107.2		123.8													11.902	7.324	14.648	25.33	8.24	8.545	9.766		19.836	7.324	11.597	7.629	12.512	27.161		10.681	9.766	12.512
27.4	613.8	61.4	254.6	71.8	1039.5	934.6		104.6	352.7	935.3	240.5	104.2	358.5		497.7	173.6	113.1		38.1													14.954	9.46	19.836	9.46	11.597	7.324	6.714		25.635	10.986	8.545	9.766	21.057	20.752		9.46	14.343	24.109
201.8	272.9	78.6	166.7	430.4	317.8	513		80.7	577.3	161.5	99.9	506.7	439.7		401.8	117.6	759.6		34.8													12.207	11.597	10.986	6.714	7.019	8.85	6.714		34.79	7.629	7.629	8.24	7.935	8.85		10.986	15.259	15.564
323.2	676.1	12.5	69.4	1194.8	50.9	768.3		316.5	778.9	20.9	279.9	598.8	816.5		167.5	227.1	195.1		293.9													39.063	16.785	7.935	12.207	11.902	36.011	8.85		7.935	22.278	8.545	14.954	9.766	7.935		8.85	9.766	14.343
15	126.8	44.6	367.9	579.9	189.1	361.6		51	697.4	247.1	87.6	60.2	721.6		85	190.9	979.5		157.1													24.719	10.376	32.349	8.545	11.292	14.648	9.155		6.104	9.46	13.428	9.46	13.733	11.597		11.902	10.376	14.038
11.7	691.2	29.9	140.3	44.8	487.5	189.4		373	357.4	567.9	119.6	126.8	141.9		629.8	28	485.6		157													17.09	12.817	7.629	8.24	26.855	9.766	13.733		10.376	15.869	12.207	8.545	8.24	8.85		10.986	9.46	17.395
130.2	1265.5	564.3	100.4	92	127.9	320.6		576.9	462.8	250.5	710.8	472.4	1026.8		506.8	211.8	337.8		580.3													20.447	18.005	7.324	11.597	9.766	10.071	10.681		7.019	12.512	9.766	10.681	8.24	11.597		10.986	14.954	22.888
14	534.3	227.1	203.3	74.5	596.3	187.4		152.9	277.9	19.8	122.1	79.8	249.6		413.5	716	384.3		221.1													10.071	10.986	10.376	10.986	6.409	15.564	9.155		9.766	7.324	9.155	10.986	7.324	10.071		48.828	10.986	19.836
8.1	518	27.9	160.3	243	321.7	133.5		627.5	991.1	202	89.3	356.6	624.8		77.2	125	76.8		394.9													14.343	15.869	11.292	8.85	10.986	10.071	9.155		9.155	12.512	11.597	20.142	15.564	26.245		11.902	10.071	12.512
132	43.7	182.8	65.2	169.7	1031.5	131.2		502.4	1102.4	1366.3	987	132.1	1706.4		739.6	1034.1	584.5		262													23.804	14.038	30.518	11.597	16.479	7.629	14.648		7.935	11.902	7.935	9.46	10.681	11.902		10.071	19.226	13.428
60.6	90	152.9	36	15.8	56.3	71.6		101.2	1014.4	574	642	179.4	339.2		12	31	492.9		30													21.667	26.245	28.687	9.46	24.414	7.935	7.019		14.343	15.564	13.428	14.038	8.85	15.564		10.071	8.85	30.212
76.1	440.3	91.3	282.9	0	26.4	2296		379	383.3	260	373	306.9	138.3		598.3	626.9	262.4		391.3													19.531	14.343	9.155	13.733	24.414	13.123	7.629		11.597	10.376	7.935	12.207	25.024	33.875		10.986	11.902	20.752
92.1	179.1	67.7	24.7	526.1	131.5	873.7		48.5	970	76	675	37.1	368		1.3	348.8	652.9		262													22.278	20.142	10.681	7.019	11.597	7.935	7.324		6.104	17.395	8.545	8.24	16.785	8.24		19.226	8.85	21.362
81	328.4	133.6	11.7	47.6	751			33.9	717.6	273.8	44.6	178.5	76.2		63.1	482	169.5		137.9													18.005	12.817	18.921	12.512	20.142	11.902			14.038	14.648	14.038	14.343	21.057	13.123		10.071	8.85	13.428
86.7	92.9	274	131.6	353.6	90.4			128.5	216.1	857.7	213	299.9	1787.6		637.4	306.9	637.7		776.4													36.316	14.648	26.55	7.935	18.005	14.954			11.597	7.629	8.85	11.597	11.902	7.019		8.545	8.85	15.564
68.6	436.3	272.7	524.9	187.7	109.7			369	349.4	349.3	294.7	51.2	417.3		1214.1	92.6	876.6		133.9													10.071	7.935	14.038	10.376	14.343	7.324			9.46	15.259	21.973	7.324	14.648	13.428		8.24	10.376	14.648
121.7	643.2	112.1	219.7	138.2	972.3			42	1883.1	371.2	508.2	19.2	154.5		127.1	80	146.1		219.7													17.7	10.986	48.523	11.902	7.629	11.292			10.681	15.869	7.629	8.24	7.629	25.024		14.648	11.902	17.09
35.7	473.6	343.8	712	31.4	569.8			225.1	561.9	690	203.7	2.6	236.2		460.6	641.6	1249.4		202.1													11.292	19.836	13.123	8.24	20.447	13.123			10.681	11.902	10.681	8.85	16.174	14.648		10.376	27.161	14.648
26.8	365.5	126.8	157.1	150.8	289.4			30.6	17.7	315.9	1080.5	2.3	1343.4		140.2	47	514.3		205.1													23.499	10.071	7.019	9.766	9.155	8.545			6.104	11.292	7.629	7.629	10.071	8.85		11.292	14.038	20.752
123.1	112.6	242.4	111.6	465.3	185.8			32	606.5	11.8	77.6	103.7	135.8		986.9	267.3	347		404.7													9.46	11.597	20.752	25.024	8.85	8.85			14.954	12.207	14.648	14.038	9.155	26.245		10.376	11.292	14.954
24.9	832.1	270.5	42.2	52.3	41.2			60.2	45.6	314.7	69.1	83.8	691.9		133.6	402	379.3		416.5													15.259	15.259	22.278	10.376	8.85	26.245			9.46	14.343	7.629	23.499	8.545	8.85		7.935	15.564	18.005
322.4	49.1	35.6	740	407.4	939.8			49.1	269	460.4	280.2	30.6	962.5		978.5	63.4	327.1		162.3													27.161	12.207	20.447	24.414	12.512	9.766			7.935	8.85	9.155	10.681	7.324	23.804		7.935	10.986	15.564
160	215.7	136.7	21.4	28.2	388.6			56.7	381.8	1764.7	153.2	203.1	217.4		224.2	460.8	74.2		880.5													15.259	9.46	14.954	7.019	7.629	19.836			7.629	12.207	14.343	8.24	10.071	7.935		12.207	10.071	13.123
56.4	299.6	339.6	245.1	364.2	412.6			53.2	805.4	854	234.8	33.2	106.4		1393.9	625.9	72.5		391.9													23.499	17.7	16.174	7.324	7.629	12.512			8.545	9.46	9.155	12.207	9.766	17.7		21.973	10.376	12.512
217.5	269.2	42.9	240.9	105.8	523.2			238.5	84.2	188.9	154.3	487.6	229.4		549.1	51.5	333.6		609.8													25.635	8.545	8.545	9.766	23.804	7.629			6.714	11.292	17.7	17.09	9.766	19.226		12.512	10.681	14.343
57.7	445.4	208.8	31.9	49	68			233.7	247.8	198.6	744.4	732.6	61.6		835	415.8	77.6		117.9													25.635	13.123	16.174	17.395	7.324	25.635			6.104	13.123	7.935	10.071	15.259	23.804		13.428	10.681	27.161
331.2	511.9	113.6	164.6	242.4	996.5			178	432	414.4	435.5	69.7	1496.2		962.1	41.2	212.7		67.5													11.902	14.343	8.85	11.597	9.766	21.362			6.104	11.292	8.85	8.545	11.292	7.935		12.512	9.766	17.09
60.4	191.9	200.7	120.7	321.8	472.4			85	827.6	236.9	51.1	116.3	1344.2		548.9	116.9	667.3		79.2													20.142	9.46	15.564	18.311	6.409	10.986			7.935	11.292	7.935	10.376	14.343	13.123		9.155	9.155	12.817
155.4	472.6	235.7	27.1	539.8	97.7			151.8	344.9	950.2	34.7	206.2	1155.7		704.5	342.1	269.8		90.4													36.011	15.259	10.681	10.681	8.85	10.376			38.452	13.123	8.24	15.564	15.259	7.324		15.564	9.155	16.785
85.1	106.3	72.8	52.2	212.1	953.1			195.3	398	124.6	235.9	336.1	607.5		30.3	283.7	88.1		214.9													25.94	7.019	11.597	7.324	7.935	13.123			18.005	8.545	12.817	14.038	12.817	17.09		9.155	11.597	12.512
96.2	826.7	133.3	36	123.2	81.2			599.8	1066.7	117.6	571.2	54.3	450.8		308.4	334.2	161.3		31													30.518	8.545	19.531	12.207	9.766	11.902			11.597	11.292	18.005	9.766	7.324	13.733		20.752	10.986	15.259
74.1	490.7	39.7	220.2	42.6	223.8			63.5	97.6	273.3	119.9	315.8	53.9		87.3	526.6	172.8		180.5													25.024	18.921	7.019	7.629	16.174	13.428			28.687	9.46	21.362	8.545	13.123	9.46		7.935	10.376	19.226
110.5	306	198.7	85.1	81.8	96.5			200.6	660.8	138	84.4	174.8	547.7		1034.2	1615.5	1330.9		41													34.485	7.019	10.681	7.019	9.766	11.902			6.409	17.7	13.123	9.766	11.902	11.597		8.24	13.123	13.428
299.3	41.6	11.7	161	0.8	730.7			0.1	43.8	592.5	184	30.3	157.2		1293.2	700.3	86.9		249.8													9.766	12.207	16.785	13.428	12.512	8.24			6.409	9.766	8.85	7.324	12.207	9.766		10.071	9.766	12.512
43.6	90.5	95.3	217	2.5	141.4			177.1	319.4	200.7	747.8	124.3	141.3		293	317.3	658.4		366.8													25.024	10.376	39.673	11.292	8.545	9.46			9.155	8.85	14.343	15.564	10.986	10.681		18.311	20.142	18.921
195.7	143.1	65.9	37.9	339.8	235.5			502.9	461	78.4	422.5	22.7	359.1		598.6	382.5	468.1		278.5													15.564	13.733	9.766	6.409	15.259	10.681			28.687	14.343	8.85	9.46	14.038	9.155		7.935	10.986	16.174
64.1	47.5	88	150.9	233.4	256.2			458.1	537.9	19.4	117.4	31	122.1		878	491.1	132.3		629.2													25.024	12.512	29.602	7.324	14.038	7.324			24.719	8.24	14.038	8.24	14.038	18.311		10.376	10.986	13.733
68.1	381.7	27.2	104.9	237.8	174.8			415.6	807.3	497.9	207.2	285.5	59.3		990.5	201.4	790.3		74													42.419	12.512	20.752	7.629	7.629	11.597			8.24	13.428	9.46	7.629	10.071	8.85		9.46	9.155	16.479
154.2	171.2	215.4	79	136.8	172.9			198.2	269.4	187.1	62.1	238.5	796.7		657.3	151.6	532.9		157.9													19.226	15.564	7.019	27.161	17.395	23.499			13.123	11.292	13.123	7.324	11.292	7.935		9.46	10.376	14.343
50.8	111.9	142.3	202.1	362.7	810.8			172.4	173	943.4	52	888.7	840		701.7	17.4	307.6		554.8													40.283	27.466	18.921	13.123	10.376	11.597			8.24	16.785	8.85	10.376	7.935	29.297		14.038	10.681	13.428
358.2	696.6	27.6	91.8	191.9	189.3			55	518.7	252.9	81.9	47.2	87.4		192.4	80.4	76.3		66.8													54.016	13.123	34.485	7.935	7.324	18.616			11.597	16.785	11.597	12.817	9.155	30.518		8.545	9.766	15.259
81	104.1	110.5	130.5	337.7	322.1			688	427.2	893.1	1007.1	22.1	3060.2		131.7	19.4	39.7		32.1													14.954	9.155	19.531	15.259	19.226	10.986			11.292	8.85	11.292	10.986	19.226	11.292		8.85	11.597	15.869
180.3	608.4	125.5	193.3	113.1	344.8			123.8	186	401	163.1	40.5	1328.2		433.8	57.5	737.2		526.6													31.433	7.629	9.766	23.499	26.55	7.935			6.714	13.123	10.071	9.46	13.123	22.888		23.193	12.512	12.817
24.3	386.9	17.4	35.9	119.8	120.6			295.3	776.9	214.8	65.9	38.4	181.5		173.3	15.1	230		385.2													17.7	11.597	24.109	12.207	14.038	22.278			16.785	11.292	12.817	10.071	12.512	7.019		8.545	9.766	24.719
37.6	76.5	72.5	51.3	374.7	341.3			794.6	132.8	72.3	171.2	435.9	381		838.6	8	200.8		194.1													10.681	12.512	12.512	11.597	6.714	8.85			9.46	8.24	18.616	7.324	21.973	15.259		23.193	11.597	20.142
25.8	940.7	91.3	137.2	50	330.1			489.9	481.9	603.2	177.7	173.4	244.6		317.4	21.8	921.8		244.2													11.292	14.648	8.24	9.766	14.038	16.479			11.902	14.954	8.24	13.428	7.629	17.395		9.46	11.292	23.804
42.3	441.2	87.3	294.3	51.1	31			175.8	1147.6	399.8	87.6	40.1	1371.2		346.7	8.3	679.3		107.9													11.902	10.376	21.973	10.986	10.986	8.24			24.109	7.324	8.545	9.766	20.752	17.09		10.681	8.85	12.817
164.5	78.2	247.7	336.1	59.6	30.6			63.2	111.9	2827.1	241.1	165.9	610		303.5	15.4	233.4		275.1													11.292	7.324	7.629	12.817	9.155	12.207			7.019	7.935	12.817	7.935	15.869	26.245		14.343	10.071	15.869
41.8	592.8	20	28.8	15.4	482.2			106.3	387.8	111.5	136.3	289.9	76.8		717.9	28.8	421.6		102.1													14.038	9.766	6.714	16.479	7.324	8.24			6.104	13.733	10.986	7.629	18.005	21.362		18.921	10.681	22.583
24.7	353.7	23	74.4	63.4	202			540	77.3	1206.3	16.9	77	552.4		683.8	23.9	61.9		32.1													16.479	32.654	16.479	7.019	6.409	25.024			7.935	8.545	11.292	8.545	14.648	36.011		21.667	10.681	20.752
30.5	193.8	65.2	312.2	178.3	298			240.5	1297.4	16.7	306.6	69.2	152.6		282.2	20.7	1027.9		460.8													19.531	9.155	14.038	12.512	18.311	8.24			8.85	13.123	17.09	8.545	12.512	15.869		13.123	13.123	14.954
23	164.2	626.2	264.6	26.3	144.4			56	464.5	994	614.2	129.3	85.3		988.4	31.1	22.3		179.5													12.817	26.855	16.174	10.071	7.935	8.24			23.193	11.292	12.207	13.428	7.935	8.24		17.395	9.766	13.428
64	333.8	356.5	128.1	33.1	1339			254.8	88.8	1649.9	193.7	116	576.6		759.1	12	71.7		283.3													24.719	13.428	21.973	18.005	7.019	9.46			11.902	11.292	21.362	8.24	14.343	25.94		22.583	9.46	23.499
219.8	886.2	89	225.8	126.6	251.4			345.4	450.2	548.7	210.5	380.5	97.5		1052.4	14.3	79.3		184.6													10.071	14.038	21.667	11.597	8.545	10.681			9.155	12.817	12.207	16.479	19.531	14.038		15.564	9.155	27.161
182.4	393	75.1	343.4	205.1	29.5			34	250.4	941.7	216.1	104.5	94.3		251.9	121.5	517.6		774.1													12.817	10.376	16.174	12.817	10.986	16.174			6.104	10.986	7.629	11.902	11.597	14.038		11.597	9.155	24.414
14.8	572.7	450.8	515.2	144.6	861.3			349.2	54.1	443	768.1	51.5	44.2		286.8	59.7	605.3		45.5													19.531	7.019	7.629	9.766	12.817	7.935			18.005	27.466	7.935	9.766	11.902	9.766		9.155	12.817	21.667
123.4	431.2	22	73.1	52.2	156.5			155	543.5	309.9	261.4	48.3	173.4		1166.8	26.6	651.3		106.9													13.733	11.597	11.597	12.817	14.038	8.24			7.324	22.583	16.785	11.597	7.935	34.485		15.259	10.376	14.038
10.3	690.8	55.5	28.8	72	31.4			238.7	496	323.1	129.8	112.7	809.2		1378.2	69	55.6		109.2													54.932	16.785	21.667	12.817	14.343	14.343			6.409	7.629	14.343	8.85	32.654	9.155		19.226	9.46	12.817
45.9	298.8	436.1	90.1	418.3	83.1			327.9	215.9	122.9	348.1	68.3	337.6		420.4	8.3	125.9		42.6													11.292	26.245	7.019	21.667	11.902	14.343			10.071	20.142	7.629	15.259	7.019	7.629		17.7	14.038	16.479
331.9	167.8	121.2	42.1	285.7	842.5			231.4	318.2	263.4	82.8	332.9	197.8		148.8	15	434.6		125.1													29.297	10.681	6.714	13.428	6.409	7.324			6.409	13.428	8.85	10.986	25.635	25.024		7.935	9.46	12.817
64.4	839.3	60.4	226.5	299.6	317.8			184.2	584.6	228	77.7	77.5	560.1		918.3	22.1	574.8		27.7													16.785	7.935	16.785	18.311	7.324	12.207			7.324	11.902	7.935	13.123	9.155	7.629		11.597	9.766	14.038
106.3	684.7	123.4	355.8	644.9	298.5			97	553.1	29.6	154.8	86.5	220.9		1211.4	72.5	136.7		52.2													11.292	8.545	26.855	9.155	9.46	7.935			7.019	21.057	20.142	9.46	10.071	28.381		24.414	13.733	14.648
58.8	258.4	121.3	24.2	102.3	162.1			1177.3	296	396	429.2	59.7	85.8		942.9	62.3	241.2		248.2													14.343	16.174	26.245	14.648	15.259	7.629			9.155	10.071	8.545	9.766	22.583	10.071		21.973	10.071	18.005
117.3	264.3	138.8	24.8	181.4	1247.5			288.4	268.1	358	250.5	19.9	111		150.8	14.3	372.5		95.3													11.292	8.545	10.071	23.804	8.545	13.123			6.714	7.935	13.123	10.071	7.324	10.681		10.681	11.902	12.512
192.2	274	18.1	84	320.3	985.9			71.5	605	168.4	153	100.6	43.5			223.3	901.2		229.1													19.226	21.057	38.147	22.888	11.292	12.512			7.629	10.681	17.7	9.155	16.785	15.869			9.766	13.123
809.2	597.1	31.5	199.8	211	12.2			320.4	562.3	2281	677.3	230.3	37.1			66	1306.7		235.7													12.817	12.512	10.071	18.921	26.55	13.733			7.935	7.324	13.733	13.428	7.324	14.343			11.292	21.667
31.8	966	148.8	248.8	86	57.2			260.7	693.7	465.7	370.5	134.2	950.6			30.6	21.1		79.9													21.362	22.888	7.629	7.324	7.324	11.292			7.019	9.46	8.24	10.376	10.681	35.095			14.038	21.057
249.9	286.1	15.4	139.8	17.5	39.9			489.3	405.7	297.8	406.5	170.8	111.2			150.9	127.6		337.9													25.635	16.174	10.681	11.292	10.681	9.766			6.714	7.935	21.973	7.629	10.986	9.155			9.46	16.479
162.6	547.8	18.2	470.4	383.9	15.1			32.5	182.3	140.7	384.1	161.3	227.4			112.7	289.9		24.7													16.785	25.33	19.836	10.681	15.259	13.123			6.714	10.071	9.155	10.376	12.512	26.245			15.259	23.499
236.9	431.4	86.3	107.2	39.8	947			52.1	455.2	129.1	125.3	238.3	110.4			521.4	320.7		175.4													16.785	10.071	7.324	8.24	6.409	13.733			7.629	7.324	8.85	9.155	14.954	9.766			13.123	20.447
103	196.3	296	56.1	180.3	43.5			224.3	741.4	653.2	41.4	190	52.4			195.7	45.5		196.1													15.259	8.85	12.207	8.545	23.499	10.986			14.038	13.428	11.597	17.395	13.428	10.681			10.376	18.921
116.9	35.1	210	116.1	111.9	17.5			131.3	831.4	1406.8	126.2	117.8	860.8			54.6	77.2		117.5													14.954	19.836	19.836	7.019	12.817	9.46			6.104	7.324	18.616	27.161	12.207	11.292			9.155	27.161
64.4	304.2	125.6	42	277.6	55.4			228.1	348.8	670.1	77.1	22.9	111			121.6	242.5		653.2													19.226	7.019	13.733	9.46	6.104	8.24			7.324	7.629	10.986	9.46	18.311	8.545			9.46	16.479
190	164.6	46.9	490.5	388.8	47			31.3	131.6	214.5	197.9	23.2	320.8			83.3	380.5		406.1													10.681	7.324	18.005	9.155	8.85	12.817			10.376	8.24	15.869	8.545	10.376	7.935			12.512	15.564
94	160.5	85.4	318.3	53.5	9.2			106.2	950.4	361.9	258.1	64.7	266.5			415.5	700.8		117.7													14.648	8.24	11.292	8.85	14.038	14.954			7.629	7.629	11.597	10.071	22.278	23.193			9.766	19.226
33.9	201.4	143.9	351.5	113	33			198.1	180.4	201.4	771.3	297.7	78.6			50.3	1860		589.2													10.986	12.817	6.714	11.292	7.629	9.155			7.019	7.629	10.376	7.935	8.24	8.545			11.597	12.817
23	19.5	40.8	101.1	168.6	54			362.1	187.3	1106.8	38.5	71.9	120.6			588.3	459.7		360.6													15.869	19.836	10.376	28.076	53.711	11.902			9.766	11.292	11.902	7.935	11.902	7.935			12.817	19.531
36.3	557.7	147.4	186	0.1	171.7			488.2	129.9	3075.3	267.3	479	374.6			330.1	401.7		218.6													12.207	6.714	9.46	11.292	54.016	9.766			15.869	7.324	8.545	7.324	7.629	10.986			32.349	23.193
96.4	1078.7	239.6	23.5	180	37.4			306.9	361.2	575.1	168.9	382.7	334			156.7	955.5		395.1													11.902	15.259	79.041	21.057	15.564	11.292			35.706	15.259	21.973	7.935	36.011	15.259			11.902	18.005
47.7	22.2	28.9	244.7	257.1	30.8			276.2	60.9	758.6	22	186.3	91			175.5	111.7		53.3													10.986	29.297	7.935	21.667	39.063	21.362			11.902	8.85	10.681	7.324	18.616	8.545			10.681	12.512
38.4	1599.1	201.7	161	431.9	103.9			42.4	252.4	1066.3	487	27.7	97.7			17.1	489.8		126.6													56.458	20.142	12.207	20.752	10.681	9.46			10.986	9.766	8.85	14.343	13.428	23.804			10.681	14.343
285	35.7	214.6	41.6	56.4	84.6			24.6	467.3	135.7	437.3	115.6	186.6			93.9	76.1		35.6													32.043	10.071	20.447	13.733	17.7	14.038			14.954	12.817	15.259	11.597	20.447	27.466			8.85	23.193
81.6	239.8	43.1	0	98.6	33			49.1	491.7	53.3	159.4	220.1	1229.1			40	564.1		108.4													20.752	11.597	8.24	13.733	14.343	7.324			8.85	8.85	8.85	9.46	9.46	24.109			8.85	14.038
209.2	108.4	49.7	178.5	304	156.2			1379.6	101.5	453.7	468	351	112.2			13.1	155.4		147.7													18.616	26.55	10.071	13.123	7.324	8.545			6.409	12.207	18.616	8.545	12.512	11.902			8.85	14.648
55.8	622	42.5	573.6	174	30.9			477.2	67.1	364.6	317.6	203.5	414.2			119.6	99.4		193.9													10.376	10.376	12.817	10.986	17.395	11.902			16.174	10.376	10.376	9.155	10.986	25.33			10.071	19.226
318.5	252.5	82.6	239.2	65.5	11.8			107	1495.5	347.9	248.3	84.7	178.6			174	188.6		214.7													30.518	39.673	14.648	14.038	8.24	17.395			10.681	14.038	7.629	16.479	13.733	9.155			9.155	14.648
143.9	84.3	141.5	127.8	15.1	7			17	2139.7	3062.1	133	79.6	285.4			159.7	403		31.4													27.771	7.935	13.123	9.46	16.785	15.564			14.954	7.935	12.817	7.629	9.155	7.935			10.681	16.785
827.8	694.9	216.8	27.6	54.8	90.9			70.5	1720.8	310.6	106.8	254.3	1357.4			15.6	968.1		375.8													20.142	25.94	19.836	13.428	6.104	17.09			9.155	10.681	11.902	9.46	7.629	14.343			9.155	15.869
214.5	151.2	38.8	77.1	73.9	39.4			169.8	220.9	59.1	143.9	62.6	942.1			189.3	224.4		650.1													12.207	18.921	9.766	8.545	9.766	7.629			8.85	11.902	11.292	8.24	9.155	14.343			9.46	15.259
13.1	21.6	128.1	637.5	157.3	212.1			201.3	210.2	266.4	253.2	354.5	547.5			336.9	207.1		63.6													15.564	13.428	25.33	20.752	11.292	11.902			9.46	13.123	9.766	7.935	11.902	7.935			9.766	24.719
314.4	504.9	180.1	195.4	307.4	20.3			206	163.7	1263.6	61.6	393.6	620.7			114.8	93.4		832.5													11.902	16.479	33.264	10.681	19.531	9.766			10.071	7.935	7.935	10.681	14.343	7.019			11.902	14.343
168.6	198	50.1	48	63.4	37.5			150.9	539.4	397.8	284.8	626.2	183.6			302.6	1809.3		317.5													15.869	21.667	17.09	6.714	6.104	10.071			7.629	8.85	14.954	8.545	15.259	8.85			9.155	19.836
185.1	817.5	83.6	20.2	77.5	12.4			32.6	454	1227.2	513.5	49.9	204.7			102.3	267.5		90.4													11.292	18.311	24.414	11.902	11.597	14.954			6.409	10.071	17.7	8.545	10.376	15.564			9.155	13.733
30.9	45.9	40.3	25.1	367.8	13.1			664.3		387.6	120.8	35.6	63.5			509.7	203.1		264.4													18.921	21.667	14.648	10.986	7.324	10.681			6.714		16.174	11.597	20.447	9.155			14.038	16.479
232.3	402.5	19.3	146.9	170.1	19.6			161.1		102.8	40.9	441.4	52			170.5	586.3		147.9													44.556	6.714	18.005	19.836	10.376	11.597			21.667		12.817	8.24	9.766	12.512			15.564	18.005
246.8	188	86.9	239.2	429.5	16.5			160		71.3	118.2	183.3	400.2			836.4	210.8		336.4													43.03	15.869	14.648	12.817	6.409	14.038			12.207		13.123	8.85	7.324	10.986			19.836	15.259
106.4	254.5	320.1	42.9	19.8	65.5			862.7		85.7	91.6	77	809.9			245.1	56.6		37													19.836	18.921	10.986	8.545	17.7	7.935			7.629		8.545	8.85	11.597	14.954			9.766	13.428
108	124.9	198	58.9	134.1	38.5			316.2		533.5	563.3	216.2	841.9			804	174.3		110.2													11.597	8.545	15.259	8.545	6.409	23.804			7.019		30.518	14.343	12.817	14.648			23.804	23.499
95.4	90.7	29	458.8	470.2	7.7			73.4		923.9	60	291.6	1095.1			851.4	888.2		433													14.954	23.193	48.523	14.038	7.629	16.785			10.376		9.766	13.733	20.752	10.986			17.395	15.564
426.8	311.4	581.3	501.3	70.9	39.7			571.5		32.5	92.9	93.7	530.2			198	812.1		697.2													18.311	8.85	33.264	7.019	21.973	13.733			10.376		8.545	8.545	16.174	30.212			13.428	20.142
85.3	189.5	116	404.2	560.7	28.4			89.1		498.2	124	464.3	122.2			684.1	708.7		99.2													10.681	7.324	19.531	10.681	9.155	23.193			6.409		8.24	9.155	9.766	8.24			9.155	18.311
173.1	895.5	206.3	281.9	245	19.1			23.5		1198.6	436.2	591.5	54.5			102.4	235.1		148.2													20.447	8.545	9.766	19.836	6.714	11.597			14.038		17.09	10.376	10.986	10.986			10.376	14.954
119	376.2	10.5	314.7	275.6	161.6			53.3		282.3	685.9	272.2	1031.3			304	113		263.8													12.817	7.629	9.46	11.902	7.935	26.245			11.292		7.629	7.629	8.85	16.479			9.155	13.428
113.2	1.7	97.9	51.9	64.7	67.5			157.5		671.9	319.6	396.1	813.2			182.8	40.1		502.3													13.428	7.935	7.629	11.902	7.935	21.973			7.019		10.681	10.376	7.019	10.986			9.155	14.954
52.5	177.3	177	294.6	99.4	103.4			333.2		746.3	609.6	119.5	348.6			1554.4	604		655.9													13.123	17.09	13.733	8.24	19.226	16.174			6.104		13.123	8.85	9.46	10.986			17.395	21.362
388	547.7	126.7	168.3	61.7	20.5			96.2		201.3	162.8	226.2	677.5			103.9	398.6		54.7													25.635	14.343	17.09	7.324	13.428	20.447			6.409		17.09	14.648	14.648	17.7			8.85	15.564
51.1	812	146.3	632	28	52.9			25.1		463.4	525.6	100.2	386.3			347.9			259.5													9.46	6.714	8.24	14.648	8.24	7.629			6.714		15.869	9.766	7.629	12.207			9.155
349.8	147.4	78	524.3	243.2	47.7			0.9		567	425.3	165.3	67.1			816.5			429.3													13.123	10.376	46.997	8.545	7.019	12.817			7.629		15.564	7.629	10.376	8.545			10.986
110	46.5	204.3	45.9	66.8	14.4			116.8		25.9	184	171.7	1038.5			613.4			119.4													20.447	10.986	9.155	9.766	8.545	13.733			21.362		8.24	8.545	23.193	14.038			17.7
153.1	187.1	152.8	60.5	86.2	194.4			546.9		30.1	395.2	62.7	1180.6			180.9			504.1													14.648	9.766	6.714	21.362	8.545	10.986			17.09		18.616	12.207	8.24	7.019			22.583
18	203.3	30.9	42.4	177.5	91.7			1179.1		48.2	115.2	58.3	40.6			69.7			244.4													35.095	13.428	23.804	23.499	6.714	10.376			6.104		19.226	10.986	8.545	17.395			9.46
183.2	133.6	121	106	212.3	638.3			67.9		1424	135.5	363.8	57.8			396			161.1													14.648	11.597	41.504	16.174	7.019	7.324			7.629		9.46	8.545	8.24	39.063			19.226
91	469	375.3	19.3	261	711			712		570.7	319.9	150.9	595.4			621.9			357.7													10.071	10.071	24.109	6.409	32.959	15.259			7.324		12.817	7.324	17.09	9.46			11.292
152.5	294.8	121.7	805.5	91.9	134.2			160.3		1686.6	312.5	220.4	290.6			651.1			280.5													18.921	7.629	12.512	7.019	7.629	7.935			16.479		7.629	8.24	10.071	28.687			20.142
124.8	53.7	518.9	293.9	144	861.2			102.5		1089	24.2	142.3	284.4			310.3			151.8													20.752	10.986	14.343	13.733	23.193	12.512			6.104		18.921	11.597	14.343	17.7			8.85
24.7	717.3	122.1	19	448.3	206.9			85.6		1046.7	113	57.8	531.4						67													23.804	7.629	19.836	17.7	15.259	16.785			7.019		13.123	9.46	14.343	11.597
215.6	689.3	159.4	56.3	40.3	172.5			352.1		75.2	75.2	147.9	602.2						87.2													14.954	10.071	15.259	33.569	13.428	7.935			12.817		13.123	7.935	18.921	7.324
118.4	35.6	316.9	332.9	93.8	958.9			541.3		739	663.4	1201.5	658.2						212													21.362	18.921	13.428	13.428	10.986	25.635			7.935		13.123	12.207	24.414	9.766
53.3	52.6	161.6	24.5	61.1	96.4			269.3		2350.3	111.5	30.8	753.1						419													25.024	14.343	19.531	13.428	6.714	7.324			37.537		10.986	10.071	7.629	9.155
156.5	138.1	176.7	163.5	613.4	334.6			112.5		1305.1	280.5	207.9	414.9						61.1													15.869	14.954	9.155	7.935	9.766	8.85			29.602		11.597	9.155	20.142	15.564
109.3	19	112.3	38.6	148.5	207.9			233.5		615.9	780.1	43.7	566.7						14.4													40.588	7.324	8.24	8.24	7.019	8.545			8.24		8.24	9.46	7.019	9.155
154.9	240.2	298.9	26.5	576.2	1422.9			236.6		91	221.9	108.7	199.7						374.3													15.869	16.174	10.376	11.597	30.518	8.545			14.954		13.733	10.986	7.629	12.512
110.8	73.7	7.9	169.7	185.6	240.2			104.5		60.7	147.3	405.1	239.1						822.5													9.766	24.414	30.823	16.174	9.46	10.071			6.409		7.935	7.629	8.545	12.207
187	299.4	106.6	57.2	274.9	211			327.8		1384.4	332	30.4	226.3						83.5													20.752	19.836	19.226	9.155	9.155	7.629			10.986		9.46	7.629	11.902	13.428
46.6	87.7	0.7	139	370.6	146.6			321.2		2333.7	151.9	148.2	355.1						170.3													19.226	8.24	19.531	7.935	7.935	24.414			10.681		14.648	13.428	8.545	12.207
30.5	472.4	188	25	48.7	114.3			69.3		84.2	294.1	25.6	269.2						291.1													14.038	28.076	13.428	21.667	6.409	7.324			27.771		15.259	8.24	12.512	11.597
157.2	519.7	140.5	165.8	53.2	651.3			170.8		262.2	55.1	64.8	380						106													12.512	10.376	13.733	20.142	10.376	10.071			6.409		7.629	7.935	7.324	14.343
133.2	542.1	27.9	308.3	89.5	227.2			66.9		910.8	239.9	86.6	226.8						533													19.226	15.259	8.85	8.545	7.019	7.629			6.714		14.954	10.376	23.193	12.207
94.1	402.3	13.7	385.6	18.8	149.3			201.3		1033.5	141.1	475	449.6						277.2													12.817	18.311	7.324	10.986	14.954	7.324			7.935		8.545	9.155	15.869	9.46
537.4	239.7	39.9	32.6	16.5	31.5			87.3		1345.8	366.7	179.6	102.7						15.1													36.316	12.512	7.019	6.714	21.973	8.545			26.855		8.85	11.597	14.343	16.479
158.3	178.4	59.7	390.1	263.1	405.5			126.6		320.1	261.2	119.5	1339.9						806.3													57.678	14.648	14.954	9.155	16.479	10.681			7.019		11.292	8.24	14.038	14.648
53.7	37.4	34.1	447.5	541	168			34.2		35.3	2.3	60.6	383.2						49.2													10.376	17.395	20.752	16.174	7.019	19.836			21.973		16.174	12.512	7.324	12.207
21.7	999.4	44.5	20.6	14.2	491.3			154		337	243.2	164.8	32.7						891.1													13.428	12.512	25.635	8.545	12.207	14.648			7.935		9.766	8.545	11.902	8.24
57.5	202.1	235	44.9	96.8	27.8			16.4		59.5	167.5	39.9	23.4						759.4													17.7	9.155	13.428	16.479	12.207	19.226			6.714		12.817	10.376	14.038	9.46
573.6	619.5	213.7	80.4	161.6	45.5			277.4		1258.8	175.8	100.8	400.2						534.8													15.869	10.681	11.902	10.986	11.597	17.7			14.954		40.894	14.954	14.648	10.071
54.4	865.1	289	38.5	49.5	484.3			505.7		911.7	600	21	674.5						1732.2													12.207	14.648	9.155	9.46	7.629	8.545			6.714		13.123	7.935	7.629	25.94
91.6	850.5	37.2	410.1	62.1	27.3			246.5		937.3	48.5	114.8	187.4						48													12.817	13.123	23.804	8.85	13.123	12.512			8.24		13.123	8.85	12.512	22.888
176.3	299.6	304.2	27.2	585.9	57.7			67.7		148.6	385.7	76.5	480.6						952.9													28.992	7.019	8.24	12.512	11.597	39.063			9.155		9.766	11.292	19.226	9.155
96.5	106.6	141.1	41.8	197.9	237.7			213.8		97.4	272.7	35.9	136.4						75.9													21.362	7.629	53.101	12.207	14.343	10.986			25.33		12.512	14.954	10.376	27.771
12.9	337.1	33.5	16.5	96.5	40.1			220.9		106	187.9	282.2	57.3						302.2													18.005	26.245	10.681	8.85	16.479	22.583			11.292		9.766	8.24	10.376	27.161
385.9	147.7	75.9	140.7	408.7	38.3			294		191.1	433	183.9	194						17.6													20.142	7.019	7.019	17.395	13.428	8.24			11.292		15.259	13.428	8.24	7.019
115.9	514.7	49.4	109.9	294.3	624.4			168		575.6	170.5	21.7	523.1						56.9													11.292	12.817	15.564	12.512	17.09	8.24			9.46		24.109	12.817	7.019	14.954
324.1	179.5	140	60	298.4	1247.9			134.3		318	41.6	246	553.1						83.3													11.902	21.057	25.024	13.123	26.855	8.24			36.316		7.629	7.629	7.019	10.986
93.7	871.9	39	135.5	383	381.2			90		1019	37.8	124.6							123.7													25.94	18.311	13.428	19.226	13.123	8.545			26.55		11.597	8.85	13.123
214.6	190.2	30.4	331.4	259.4	430			142.7		565.5	70.9	65.2							536.9													23.499	22.888	20.142	10.376	7.019	8.545			20.752		8.85	7.629	9.766
154.2	78.8	224.4	104.4	85.4	226.7			54.3		1069.6	252.1	149.1							250.6													14.648	20.447	21.667	10.071	13.123	8.24			7.019		8.24	9.46	14.038
11.4	157.3	145.7	49.2	172.6	191.2			409.2		3400.7	348.9	65.9							472.6													33.264	16.479	11.292	9.46	6.104	8.545			10.376		8.545	9.766	12.817
70.2	171	152.3	220.5	141.3	598			211.2		343.4	143.7	208.6							29.6													18.921	9.766	9.766	9.766	9.766	10.376			6.714		7.629	10.681	20.752
65.7	68.6	82.3	0	88.3	24.2			167.4		20.5	85.4	136.6							104.5													17.7	7.935	6.714	9.766	6.104	11.597			13.123		10.986	7.935	10.986
184	217.2	115.9	73.7	455.3	134.8			15.3		1844.7	192.8	100.7							243.5													9.766	13.123	7.935	6.409	11.902	10.986			7.935		10.681	9.155	19.226
211.4	344.4	76.1	0	492.4	204.9			247.1		146.5	348.1	200.9							398.7													11.902	14.038	19.226	6.409	13.733	7.935			28.687		17.09	7.324	12.207
24.8	42.4	16.4	175.5	505.9	534.5			106.5		1253	179.9	234.1							73.2													17.7	9.46	10.681	11.292	6.714	18.311			6.409		18.311	7.324	10.986
28.1	184.2	45.9	0	297	47.3			271.6		240.6	49.9	31.3							526.3													11.597	9.46	14.648	11.292	23.804	13.123			37.842		7.935	7.935	18.005
31.7	80.1	211.9	65	101.9	140.2			102.7		230.2	310.9	248.6							926.1													24.414	9.155	34.79	12.207	6.714	17.395			22.888		7.935	8.24	14.038
44.7	205.4	191.8	0	35.5	621.3			383.8		308.4	932.8	43.7							116.2													17.395	13.123	7.629	12.207	10.376	14.038			10.681		9.46	15.869	17.395
38.3	142.1	75.5	177.7	257.1	211			123.6		335.2	214.4	154.4							135.3													10.986	7.935	14.038	8.24	29.907	11.292			7.324		8.85	7.324	7.629
101.1	266.9	37.1	0	308.3	94.7			139.5		841.7	154	238.2							129.6													20.752	14.038	28.992	8.24	7.935	11.292			16.479		9.766	8.24	13.733
210.5	179.4	52.4	41.6	127.2	54.9			280.7		150.2	212.2	487.3							463.6													23.499	15.564	7.324	8.545	6.104	20.142			6.104		10.071	17.7	9.155
198.9	413.3	24	0	142.5	305.4			365.6		566.6	398.7	389.3							243.8													46.692	16.479	14.954	8.545	8.24	7.629			9.46		11.292	7.935	7.019
93.9	1077.3	259.8	808.7	691.2	383.8			790		90.7	88.5	123.6							51.4													10.071	9.46	20.447	10.376	6.714	8.85			7.019		8.545	11.292	13.428
281.8	154.1	49.2	98.8	334.5	338.9			29.3		96.1	75.7	55.2							531.4													46.082	25.33	10.986	7.019	8.85	8.85			10.986		14.954	8.24	7.935
50.6	233.7	33.9	446.6	121.3	238.5			618.9		250.8	788.4	97.1							282.7													13.123	9.766	21.362	7.019	10.986	8.24			7.629		14.954	9.155	9.46
82.3	150.8	245.8	41.5	108.8	360.2			125.1		820.8	483.6	90							369.5													11.292	10.986	14.343	14.038	14.343	17.395			12.512		7.629	10.986	27.771
192.3	60.3	15	62.6	100.1	88.3			385.1		139.3	185.9	152.8							619.2													15.564	32.349	20.752	6.409	10.681	22.278			6.104		8.24	8.24	12.817
171.9	124.9	85.9	181.1	115.9	1025.1			261.7		873.9	527.3	198.5							249.4													15.869	6.714	33.264	9.155	10.071	7.324			8.24		18.921	10.376	17.09
156.7	118.5	263.2	37.6	16.3	1403.6			22.5		284.3	266.9	40.8							567.1													20.752	10.071	32.654	11.902	8.24	10.071			28.076		7.629	7.324	8.545
159.2	447.3	96.1	16.3	143.9	1104.4			24.7		958.5	93	275.5							18.5													23.804	18.616	9.155	21.667	6.409	22.278			7.324		7.629	9.155	15.564
35.8	17.1	317.2	463.8	881	125.7			159.5		697.7	244.8	261.8							436.7													26.245	7.324	20.142	10.681	21.973	12.817			41.199		13.428	9.46	25.94
88.2	17.3	19.9	323.1	434	35.7			103.2		2724.8	39.9	103.3							501.1													28.992	29.602	19.836	16.785	6.409	9.155			6.714		7.935	7.629	7.019
126.4	383.9	50.2	45.9	11.3	232.8			210.7		311.4	184.3	82.5							615.8													14.648	15.259	10.071	9.46	31.738	7.629			6.409		11.292	8.545	12.207
260	346.2	236.3	30	157	81			252.2		1687.1	486	618.4							1022.4													20.752	16.174	9.766	7.935	7.324	10.681			7.019		19.531	9.155	11.292
140.7	1027.6	200.4	391.7	177	211.4			219.1		887.5	279.7	136.1							76.1													10.376	25.024	13.733	8.85	11.292	11.597			23.804		13.733	11.902	9.766
19.4	104.2	24	39.6	189.9	490.8			584		225.2	215	34.9							24.4													14.038	8.545	14.038	15.259	12.817	7.935			7.324		16.785	8.545	7.935
59.8	423.7	172.2	137	251.1	802.5			498.1		877.9	122.6	43.8							1477.3													13.733	7.019	29.907	12.512	15.259	7.324			18.005		13.733	8.24	8.24
107.9	116.3	74.2	85.1	713.1	92.7			310.4		131.6	27.4	307.9							324.5													10.376	10.681	42.419	10.681	18.616	10.376			23.193		8.24	8.85	13.428
60.5	67.9	173.8	19.8	135.7	33			31.9		237	226.3	216.4							709.2													23.193	18.921	12.207	12.817	8.545	7.629			37.842		15.869	8.24	18.616
131.7	34.2	108.3	85	24.8	318.1			111.7		41.1	163.1	190.6							187.2													16.479	11.292	12.512	9.766	6.104	8.24			20.752		14.343	22.278	7.935
48	248.5	437.2	783.8	334.9	1022.9			39.5		857.5	155.8	42.5							87.6													40.588	11.597	17.09	12.512	10.376	8.85			18.616		14.343	11.902	9.155
192.5	19	68.8	125.6	719.5	92.5			127.9		2543	155.3	105.5							308.5													19.226	10.681	7.019	13.123	25.33	10.071			9.155		7.629	8.24	7.019
416.6	552.9	19.5	348.4	424.6	47.1			79.5		1198.7	222.2	187.6							426.7													17.09	10.071	6.714	6.714	15.259	15.259			8.85		8.85	8.545	14.954
94.3	441.9	85.6	173.4	23.1	194.8			336.2		241.1	37.9	24.8							195.2													18.311	9.155	12.817	23.804	9.46	7.324			10.681		9.46	9.46	12.512
301.3	1251.5	408.2	153.5	152.1	587.3			22.1		1007.3	845.6	205.6							277.6													16.785	19.226	6.714	8.85	16.479	11.292			6.409		10.986	10.376	11.902
53.3	196.5	129.5	47.2	36.5	42.2			112.4		67.2	30.7	164.6							374.5													13.123	19.226	11.597	10.376	7.629	21.973			36.621		14.954	11.597	8.545
73.4	979	133.2	202	30.7	386.6			258.9		1922.2	382.8	48.1							1066.4													20.142	7.019	26.855	11.902	14.343	29.602			11.292		19.836	13.123	7.629
203.9	266	250.2	248.7	602.4	215			264		205.8	456	34.1							390.7													29.907	10.986	16.479	8.545	6.714	9.766			15.259		9.46	10.071	17.09
217	343.1	68.8	433.8	360.6	200.9			750.7		314.8	106.9	345.9							566.4													22.888	14.954	8.85	9.766	9.46	11.902			8.24		7.935	7.324	13.733
350.2	70.9	10.3	52.5	165.6	115.4			65.6		3046.8	272.9	52.3							726													9.46	7.019	7.019	17.09	8.545	12.512			9.46		7.935	7.935	7.935
48.1	551.6	99	46.8	25.1	45.2			287.3		181	383	99.9							2255.7													17.7	21.057	9.46	9.155	9.155	13.123			8.85		15.564	20.752	18.616
47.9	377.9	76.3	204.2	82.1	212.8			413.5		417.5	218.9	198.1							142.8													16.174	17.09	18.311	21.667	11.597	10.986			7.629		19.836	9.46	7.935
52	55.1	56.3	513	316.8	642.5			55.3		1348.1	572.8	142.7							53.8													12.207	7.324	16.785	8.85	20.447	8.545			11.902		7.935	11.597	10.071
127.9	1180.3	232.3	22.9	194.7	1125.9			174.2		308.1	91.9	874.1							1677.4													24.414	12.207	72.632	11.902	10.071	20.142			7.935		7.629	9.155	11.292
59.2	200.9	718.6	42.8	278	119.2			131		278.8	400.3	160.5							186													28.381	11.902	8.85	12.512	8.545	10.986			6.714		24.414	9.46	9.155
110.2	204.4	20.8	537.8	84	263.4			1103		1821.5	21.3	423.1							169.9													9.46	38.757	30.518	8.545	10.376	15.564			22.583		28.992	9.155	8.545
213.9	155.8	74.3	37.8	61.5	1142.3			252		379.1	101.4	114.8							29.1													14.954	10.376	8.24	20.142	10.071	9.766			10.376		19.226	7.324	31.738
55.4	415.1	24.1	430.7	149.9	34			257.8		242.2	112.4	80.9							243.7													13.733	17.09	6.714	17.09	14.648	13.428			21.973		15.259	10.986	9.766
28.1	220.7	278	247.5	66.5	3071.8			224.2		1922	963.6	157.3							421.3													14.343	14.038	23.804	21.057	17.7	20.447			18.921		14.038	7.935	14.343
145	626.8	17.4	33.4	75.3	509.8			141.2		950.4	142.1	38.6							535.8													14.343	21.362	14.343	13.428	34.18	7.324			7.629		7.629	10.376	7.935
15.8	35.5	231.8	302.6	206.2	373			57.9		5630.8	203.6	147.6							230.7													16.785	16.174	10.986	16.785	7.629	7.629			13.733		10.376	14.648	7.019
244.3	740.9	38.4	132.7	134.8	107.3			251.6		640.7	84.7	238.3							128.3													24.109	10.071	10.986	9.46	13.733	10.681			8.545		7.935	9.766	8.85
53.4	537	41.3	47.2	294.7	864.2			808.6		943.3	103.7	303.4							215													28.687	20.447	8.24	12.207	8.24	28.992			9.46		10.071	9.155	13.428
17.7	72.8	74.4	30.8	30.8	120.2			31		52.9	103.3	27.6							294.1													15.564	6.714	22.583	10.376	14.343	9.766			7.629		8.545	10.071	14.954
298.1	258.2	19.2	303.7	103.2	542			792.3		791.2	414.4	277.1							174.4													11.902	8.545	7.629	8.85	7.629	7.935			21.057		17.09	8.545	17.395
107.2	149.8	188.4	93.3	377.4	179.9			112.7		1233.7	290.5	146.8							80.1													9.46	10.681	16.479	6.714	6.104	20.752			29.297		9.46	13.733	7.629
113.4	525.8	81.5	62.2	394.6	38.8			118.6		346.6	52	72.2							56.2													26.245	24.719	14.038	28.076	6.104	7.324			7.935		10.071	8.545	23.499
146.5	59	15	48.9	81.9	459.7			490.2		220.2	560.4	184.5							642.2													17.09	7.935	9.155	7.019	18.311	9.46			27.466		13.428	7.324	7.019
24.1	342.9	303.4	23.3	96.9	34.3			144.4		281	556.9	75.3							199.9													17.395	9.46	13.428	14.343	6.409	12.207			11.292		9.46	7.935	16.479
293	225.6	127.6	45.3	356.4	788.9			131.5			362	243.2							41.3													22.583	20.752	59.204	10.681	14.954	9.155			7.629			8.85	22.888
126.1	830.4	149.4	212.9	45	36.8			102.8			350.7	30.2							171.7													20.447	32.654	33.264	19.531	9.155	13.428			26.245			9.766	10.681
76.5	932.7	85.7	246.2	38.1	306.1			352			429.5	35.7							258.2													12.207	16.174	7.629	18.311	6.409	18.616			12.817			7.935	29.602
37.3	33.4	66.3	42.7	633.5	25.9			798.4			132.7	73.7							591.1													36.316	9.46	11.292	15.564	6.104	7.324			12.512			8.545	13.733
97.5	185.7	407	30.7	155.5	457.5			155.3			698.9	227.4							108.6													19.531	18.311	7.935	12.817	7.629	19.531			7.324			17.395	9.766
21.6	18.2	241.4	240.1	290.2	35.7			768.4			27.1	23.9							1357.6													13.428	9.46	18.311	13.123	17.395	10.376			9.155			9.766	12.512
251.7	516.8	132.3	472	219.5	428.5			217.8			26.8	38.8							164.7													18.311	12.512	7.935	7.935	6.104	8.24			6.409			7.935	26.245
556.2	548.3	57.4	229.8	660.7	123.1			49.7			332.9	132							156.5													28.076	7.019	9.766	11.902	9.46	7.935			17.395			10.376	12.512
24	102.6	331.7	159.6	976.1	220.9			140.1			259.7	188.1							70.2													11.292	15.564	27.771	9.766	17.395	8.545			22.278			13.428	12.817
275.1	726.2	103.9	87.8	584.9	261.5			189.4			41.6	66.3							567													13.733	20.447	7.935	9.155	23.193	16.479			48.218			10.986	11.292
71.3	657.4	384.9	29.6	68.8	73.7			0.8			461.8	288.5							513.6													23.804	7.629	6.714	10.071	9.46	9.155			49.133			13.123	11.902
12.1	18.9	12.5	147.6	36	1634.4			53			114.8	75.1							87.8													11.597	22.888	14.038	13.733	6.714	11.902			6.714			8.24	13.428
249.6	468.8	16.4	62.9	46.5	47.1			454			161.3	624.7							15.6													21.057	12.512	18.005	27.161	7.019	11.597			6.714			7.324	13.733
162.7	246.1	243.8	54.3	640.6	154.2			60			396.1	312.5							147.6													10.986	14.343	14.954	28.992	12.207	27.161			15.869			7.324	32.654
45.1	122.9	348.4	60.6	671.6	195.1			285			76.9	97.3							435.6													22.278	9.155	6.714	14.954	6.714	12.512			8.545			7.629	10.681
164	271.1	40.3	72.2	936.3	586.4			220.9			198.1	19.5							207.5													15.869	11.597	12.207	14.954	7.324	12.817			7.935			10.986	14.343
277.5	87.5	18.1	46.4	97.8	319.4			398.4			399.8	31.4							206.8													18.311	20.447	28.076	11.597	11.902	10.376			13.733			10.681	12.817
341.3	320.1	35.2	472.4	93.1	142.2			88.6			633.2	81.3							51.3													12.817	18.311	8.24	8.85	7.324	7.629			8.545			11.292	12.817
238.1	155.9	14.9	178.7	257.1	120.2			57.3			344.7	86.8							953.9													42.725	12.512	11.292	14.038	9.155	7.324			6.714			9.155	33.569
58.1	256.9	65.8	220.5	176.4	106.7			130.9			62.7	773.2							143.9													26.245	10.071	28.687	10.681	6.714	8.24			7.935			11.292	31.738
151.5	561.9	28.9	163.5	99.8	99.7			39.7			224.8	63.4							283.1													20.142	11.597	12.817	12.817	7.324	8.545			7.019			12.512	12.207
86.1	252.1	122	51.7	210	101.8			27.8			282.7	219.2							258.2													9.46	11.597	12.817	16.479	9.155	7.935			6.714			9.155	13.428
237	268.5	89.9	64.3	103.3	192			305.7			112.7	297.2							544.9													26.245	11.902	15.869	17.7	6.409	9.155			6.714			8.85	16.174
219.9	58.5	17.3	45.7	551.4	200.6			31.5			480.8	343.4							92.9													22.888	20.447	7.324	7.019	11.902	10.681			6.104			7.324	7.935
158.3	564.5	378	290.6	593.7	2378			91.7			24.7	54							72.9													16.174	20.142	23.193	10.986	8.545	13.733			31.128			9.766	14.648
57.1	147	571.4	20.8	278.5	540.2			107.3			85.5	683.4							114.4													24.719	22.888	20.752	13.123	16.479	8.545			6.714			8.85	18.311
443.1	99.4	12.9	63.4	285.7	526.5			523			290.9	302.1							555.8													17.09	13.733	7.935	22.888	7.019	29.297			10.986			9.155	9.155
43.8	96.9	35.8	62	118.1	1085.7			269.7			197.9	40.6							2455.9													12.512	33.569	7.324	9.766	7.629	13.428			6.104			8.85	10.376
12.3	109	107.2	44.9	158.5	599.8			43.9			255.9	17.7							2105.4													35.706	17.09	7.324	8.85	9.155	20.142			10.071			7.324	16.174
89.9	554.3	40.8	107.5	33.6	267.5			287			700.6	492.6							286.5													27.771	7.324	15.564	19.531	6.104	13.123			9.46			11.597	8.85
74.8	188.6	179.3	114.7	129.8	174.2			1.5			583.3	78.5							538.2													18.005	12.817	10.986	10.071	9.155	22.278			10.376			10.681	12.817
231.9	302.6	18.5	14.2	155.5	553.7			256			82.5	155.5							400.7													29.602	32.654	19.836	15.564	8.545	9.155			18.921			9.155	8.545
85.6	478.8	38.4	264.8	174	26.6			315.5			107.9	29.6							46.6													25.33	9.766	7.935	21.667	19.226	25.024			13.428			8.24	12.207
16.1	116.5	13.7	34.6	132.3	74.6			506.3			578.9	290							68.2													10.986	7.019	15.564	16.174	16.785	8.24			6.104			7.935	14.038
161.7	28.8	46.4	451.7	280.4	123.2			351.5			78.7	214.7							155.7													10.681	28.992	9.155	21.667	7.324	11.597			23.193			8.24	12.817
42.5	339.4	159.7	100.3	280.9	78.6			101			34.7	416.8							600.2													28.992	12.207	30.823	14.343	14.648	7.935			7.629			11.902	7.629
222.4	253.3	46.6	349.5	257	30.1			232.7			591.3	123.8							149.2													24.109	14.954	49.438	11.292	11.902	19.531			16.174			11.292	14.038
278.1	18.8	67	211.7	21.7	586.7			83.3			25.8	174.8							294.3													21.667	28.381	10.986	23.193	9.46	8.85			8.85			11.902	7.935
144.6	135.8	70	20.1	486.4	990.1			48			787	95.7							152.1													27.161	10.071	40.894	15.869	10.071	7.935			20.752			7.324	11.292
243.1	71.2	55	121.6	302.9	805.7			407.5			233.3	48.8							49.6													12.817	21.362	11.597	11.597	13.123	15.564			7.019			7.324	8.24
54.9	249.6	105	325	119.6	113.8			141.7			46.7	76.5							183.1													13.123	9.155	7.324	19.836	11.902	18.311			6.714			16.479	37.537
42.7	23.3	259.5	95.8	220.3	349.6			164			104.1	52.5							306.9													32.959	10.986	9.155	10.376	7.019	11.597			24.414			7.935	12.207
363.9	348.4	94.6	366.7	67.5	472.1			370.9			355.2	395.5							322.1													36.926	13.428	18.616	6.714	23.193	14.038			10.681			9.766	14.038
27.3	160.8	115.2	212.9	45.5	300.5			519.6			1374.4	92.6							21													25.635	22.888	34.18	10.376	6.714	18.311			8.545			9.46	8.24
158.4	135.3	206.9	50	166.5	227.4			193.5			216	83							17.8													15.869	7.324	17.09	21.973	13.428	11.902			18.616			8.24	11.597
13.6	837.2	377.5	23.8	71.1	275.2			89.3			52.5	309.6							107.6													11.902	14.343	25.635	14.954	7.629	9.155			6.714			7.324	9.766
214.7	399.8	124.5	43.3	101.9	295.8			271			35	269.4							187													19.226	41.504	6.714	9.46	20.752	10.071			15.259			7.629	13.428
113.8	985.1	92.7	105.4	350.7	1460.9			192.5			300	255.2							22.8													19.226	12.207	14.343	7.324	11.292	10.986			7.019			8.24	13.428
216.7	36.1	70.7	28.4	111.4	212.7			387			812.5	144.5							100.9													14.343	12.817	6.714	8.24	6.409	23.193			7.019			8.24	7.629
45.3	53	151.2	214.5	338.4	82.8			37.1			210.3	131.5							331.5													9.46	8.545	37.231	15.259	19.836	11.597			9.46			7.935	7.629
301.6	201.6	60.2	38.4	169.7	54			621.7			62.5	37.9							178.8													11.902	8.545	12.512	9.155	9.46	14.648			7.019			7.629	18.616
230.1	102.8	96.5	162.9	22.3	606.7			428.6			99.8	209.5							412.8													17.395	13.123	7.324	9.155	8.24	21.057			11.902			10.681	21.057
52.1	127.4	607.2	84.5	116.2	27.5			207.3			133.4	209.8							27.5													19.531	10.376	14.038	14.954	9.766	10.376			7.629			8.545	8.545
107.3	371.8	427.6	82	34.8	1360.4			858.7			69.9	99.6							820.4													14.954	7.935	15.564	10.071	8.85	12.817			7.324			13.123	26.55
41.6	178.3	83.5	294.4	117.9	278.7			21.5			432.1	249.5							99.7													13.123	17.395	11.292	11.597	6.714	17.7			11.292			9.46	7.019
143	463.8	87.1	114.3	24.3	930.4			343.8			306.2	42.4							99.5													54.321	13.123	40.894	15.564	8.24	9.46			12.512			8.545	10.986
232	96	202	173.3	95.5	1230.5			167.2			351.6	133.8							0													30.212	7.629	14.648	10.071	11.292	15.869			24.109			7.324	7.935
199.4	193.3	165.8	45	399.5	371.1			580			224.7	35.9							89.1													13.733	10.071	14.954	19.836	26.55	13.123			15.564			8.85	12.512
36.1	57.2	40.2	154.8	147.9	1003.6			160.5			476.1	39.1							253.4													10.681	15.869	8.545	10.071	7.629	13.733			21.057			8.24	11.292
265.5	87.7	76.7	110.6	494.5	951.7			302.4			102.2	132.8							101.3													10.376	10.376	45.166	15.259	9.766	7.935			6.409			9.766	36.011
201.5	10.5	259.9	291.1	835	316			328.8			113.2	166.3							64.8													20.447	19.226	8.545	15.259	10.986	8.85			6.104			7.935	11.292
80.3	98.2	54	16.6	278.9	775.2			242.5			233.2	96							19.1													10.681	6.714	19.531	10.681	6.714	7.629			7.019			16.785	9.766
139.7	510.8	49.9	35.5	298.5	67.6			157.5			177.3	138.8							119													20.142	14.038	14.343	12.817	6.714	8.545			8.24			10.071	10.071
254.2	18.6	55.2	270.6	39.6	186.3			521.5			491.6	76.9							201.8													15.564	14.038	18.921	15.259	17.09	21.057			7.935			8.545	15.259
15.1	1341.9	69.7	89	132.8	489.2			52.9			29.4	24.9							64.6													23.804	7.629	12.817	16.785	9.155	7.935			11.292			8.85	23.804
97.6	100.3	65.4	219.2	987.8	205.4			74.4			205.1	72.3							589.6													19.531	6.714	9.46	13.733	6.409	21.973			9.155			8.85	13.428
43.2	93.2	50.7	150.4	190.8	146.5			1			501.5	137.8							90.3													19.531	10.376	12.512	10.681	15.259	10.681			11.902			11.292	14.343
188.3	88.6	56.4	413.6	81.6	312.4			141.7			88.5	45.1							351.9													17.09	16.174	24.414	14.954	14.954	7.629			10.071			8.545	35.095
191.3	1326.2	32.6	76.7	580.8	241.2			46.5			33.4	197.1							348.7													20.447	23.804	12.207	17.7	30.518	13.733			7.019			9.155	10.071
120.8	125.8	82.3	79.6	170.2	133.8			306.5			704.1	223							635.3													9.46	7.935	9.155	8.545	12.207	11.902			14.343			8.24	8.545
198.2	155.6	93.2	305.3	301.6	163			384.5			56.2	158.1							962.5													31.128	14.954	29.297	6.714	6.714	15.259			8.24			13.428	12.207
16.6	477.1	40.1	18	71.4	294.7			25.8			160.7	30.2							1011.7													12.817	9.46	8.24	18.616	7.019	8.85			8.24			10.376	11.292
67.6	52.9	113.3	48	396	989			230.6			381.5	95.8							244.8													15.869	9.766	8.545	10.071	8.85	15.869			6.714			7.629	7.629
27.3	233.7	103.1	101.6	28.7	127.9			181.1			47.3	55.2							384.4													11.292	18.311	19.531	16.174	6.104	7.324			7.324			8.545	7.324
19.8	213.5	206.1	80.8	9	470			36.3			161.4	112.1							544.1													21.057	28.687	48.828	11.902	14.038	13.733			9.46			8.24	8.545
197.8	34.1	2.2	84.8	128.6	1931			119.8			487.2	285.5							871.1													13.428	12.817	75.073	8.85	11.597	9.766			6.104			8.24	19.226
20	701.9	95.8	97.6	163	291.8			142			36.6	78.4							213.6													34.485	29.297	8.85	11.597	12.512	11.902			6.104			11.292	13.733
97.8	717.3	27.4	146	817.9	671.4			105.9			77.3	181.5							751.1													19.531	17.09	64.697	8.545	11.597	11.597			12.207			10.376	8.85
330	111	0.8	17.4	96.6	1.6			605.5			302	88.5							656.9													24.109	13.733	67.444	8.85	8.545	18.616			6.104			8.85	7.324
232.2	439.8	294.8	350.2	277.4	275.4			320.8			54.7	88.5							1562.5													11.292	8.545	13.733	16.785	15.869	7.324			9.46			14.038	9.46
45.2	1255	164.2	49.5	1037.5	99.2			810.4			1362.1	329.1							273													10.986	9.46	15.564	14.038	6.714	7.629			14.038			9.155	15.869
305.8	427.9	247.6	42	318.5	59.4			196.6			803.8	413.9							605.2													9.766	14.343	16.174	8.24	11.597	13.733			8.545			12.207	11.292
27.9	70.3	243.2	270.6	421.5	283.4			430			513.7	207.6							537.2													18.616	11.597	19.836	19.836	11.292	8.85			8.24			12.817	17.7
94.1	257.5	128.1	135.6	153	2701.1			173.2			80.8	131.6							396.6													11.597	14.648	7.019	11.597	12.207	25.024			7.019			9.46	9.155
190.1	383.6	51.7	49	220.1	159.1			84.1			414.8	112.4							278.7													18.921	14.648	9.766	24.719	10.376	9.766			7.019			11.292	8.24
57.2	736.4	232.5	167.2	25.6	206.9			139.1			269	19.7							698.4													14.343	18.616	20.142	17.7	7.629	8.85			6.409			10.986	12.817
18.2	480.9	43.3	25.8	754.1	258.5			348.3			218.5	143.1							96.3													15.259	7.629	8.85	11.902	25.33	7.935			14.954			11.292	7.324
39.9	728	178.7	57.6	185.4	520.3			411.1			654.7	235.3							52.1													39.673	12.817	16.174	21.057	8.24	19.531			7.935			8.545	14.343
150.8	488.4	98.7	327.7	172.7	702.4			282.3			100.4	135.3							82.2													18.311	8.545	11.597	21.667	7.019	18.616			7.324			7.629	13.428
137	381.6	100	301.8	150.7	146.9			165.7			253.8	361.7							916													13.733	16.785	14.038	16.479	14.038	11.292			9.766			7.935	11.902
185	46.2	70.8	265	117.8	183.9			71.1			131.6	149.1							460													10.986	7.629	31.738	8.85	8.85	7.629			8.545			7.324	7.935
59.4	61.6	23.1	55.6	158.2	138.8			338.5			198.5	169.8							232.9													10.376	13.428	12.817	12.512	8.545	7.324			8.24			8.85	11.597
44.4	129.4	154.2	536.8	237.4	1702.9			169.4			272.9	213.5							1015.4													11.597	19.226	18.616	24.719	7.629	7.324			10.376			7.629	7.324
1.9	212.1	163.8	32.8	1095.1	555.3			228.9			630.1	467.6							119.4													15.564	14.038	11.902	12.817	9.766	16.785			18.005			7.324	14.343
219.8	313.2	249.3	23.8	41.1	50			278.9			44	243.3							718.6													11.292	18.311	14.648	7.935	26.55	12.817			27.771			13.428	10.986
57	368.9	60.6	36.5	91.7	40.9			51.6			972.1	15.6							283.9													19.531	8.85	12.512	7.935	6.714	7.629			6.714			10.071	10.376
135.8	69	87.4	150.6	291.3	70.8			378.6			395.7	148.5							261.1													18.921	7.629	30.212	12.817	15.869	11.597			7.019			11.902	13.123
11.3	44.4	104.9	199.6	86.4	847.7			56.6			136.2	39.8							59.9													11.902	12.207	10.986	7.629	10.376	9.766			13.428			8.545	15.564
146.7	132.7	28.4	215	285.2	1014.4			68.3			159.6	213.7							72													18.921	28.992	17.395	7.019	8.545	10.986			16.479			10.681	10.071
233.8	115.3	141.6	121	696.5	917.7			194.1			220.5	43.6							161.3													14.038	22.583	14.038	9.155	11.292	12.817			39.063			7.324	12.207
44.3	472.6	106.5	48.9	36.2	328.2			91.3			287.5	201.9							122.1													23.804	18.921	9.155	16.174	6.104	27.161			18.616			9.155	12.207
79.2	439.4	165.6	395.7	203.4	422.7			53.7			612.2	29.9							71.2													18.005	22.278	11.597	7.629	7.019	22.583			7.935			10.986	8.85
226.2	221.7	324	71	566.8	272.7			321.7			68.8	71.9							160													24.109	13.733	16.174	6.714	8.545	12.817			7.324			10.986	17.7
133.3	294.2	263.5	234.4	636.2	97.1			392.5			375.2	55.1							322													14.648	25.94	14.954	15.564	6.409	8.85			32.959			7.935	8.545
69.7	132.5	68.2	128.7	450.9	97.1			622.9			218.5	383							613.4													11.292	8.545	11.292	7.629	9.155	9.46			36.926			7.629	13.428
170.4	308	106.9	33.2	523.6	55.5			46.2			406.7	228.2							755.8													29.602	15.564	10.071	11.597	14.648	13.428			10.376			8.24	7.324
140.7	110.8	27.6	31.2	83.7	230.5			1.7			170	79.3							232.9													15.259	10.376	12.817	7.935	6.409	17.7			11.597			19.226	10.071
21.1	199	70.5	81.3	16.1	151.1			93			1563.9	158.2							623.6													20.142	7.324	12.207	9.766	9.46	15.259			6.714			7.324	13.123
116.8	254.9	20.3	79.4	48.1	252			764.9			645.3	74.5							66.5													31.128	17.09	8.85	26.55	11.597	14.954			6.409			12.512	7.019
19.1	283.9	158.7	450.9	402.3	759			186.3			300.9	245.8							49.7													19.531	10.071	21.667	33.264	9.46	19.531			8.85			14.648	25.024
84.6	129.2	54.6	112.7	34.8	90.1			279.8			331.6	32.8							154.7													12.817	7.019	11.597	6.409	14.648	10.681			12.512			9.155	8.545
82.1	197.4	134.2	43.9	110	35.8			431.8			354.4	35.2							201													9.46	17.09	7.019	18.921	10.681	9.155			13.123			10.071	14.648
49.9	30.5	51.1	64.6	509.7	118.7			97.2			973.2	223.2							253.3													9.766	14.038	17.395	9.155	6.409	9.46			13.123			8.24	11.597
79.9	29.7	118.1	82	280.1	289.8			26.8			659.6	139.2																				10.986	6.714	10.376	8.545	9.46	10.071			9.766			11.292	7.629
219.1	55.3	26.1	187.2	324.8	436.2			72.5			44.3	156.8																				27.466	15.869	7.324	8.545	8.24	10.071			8.545			14.038	11.292
164.3	418.7	398.2	41.8	208.1	650.9			1060.3			54.2	49.8																				10.986	14.648	15.564	15.259	8.24	7.324			9.46			7.935	21.057
136.7	636.8	16.3	300.8	219.1	573.7			283			83.3	29.6																				13.123	10.071	11.292	13.123	11.292	9.46			10.376			7.935	12.817
177.1	161.8	365.3	453.8	477.7	1033.6			204.6			413.9	105.2																				11.902	7.324	15.259	8.85	16.479	12.817			7.629			8.85	9.155
123	301.3	223.6	35.2	29.5	469.4			135.8			228.1	43.5																				27.771	7.019	15.564	8.85	13.123	10.071			13.428			10.071	10.376
39	591.7	119.1	94.5	161.6	626.1			58.4			681.9	85																				19.531	6.714	17.09	24.414	7.935	8.24			11.292			10.071	29.297
36.3	177.8	76.2	283.7	356.5	330.6			185.2			1261.1	29.6																				10.681	14.954	9.766	11.902	8.85	25.635			32.959			17.395	25.635
194.9	592.4	39.4	43.4	0	145.6			135.7			1189.6	67.7																				20.447	9.766	10.681	9.766	8.85	8.545			6.104			8.24	14.954
153.9	496	138.9	46.6	279	1574.2			127.6			233.9	435																				11.292	23.804	18.616	23.193	6.104	15.869			12.817			7.324	24.719
84.8	245.7	91.5	115.8	153	319.4			47			328.7	55.3																				18.921	15.259	16.785	14.343	16.174	10.376			31.128			11.902	13.733
115.5	646.9	48.8	46.9	821.4	226.5			45.5			155.3	201.3																				23.499	16.479	22.583	12.512	6.714	20.142			21.057			9.766	7.629
108.4	560.3	74.3	20.5	112.2	855.1			51.6			280.1	44.7																				17.395	9.766	20.752	9.46	6.409	7.324			10.071			10.376	9.46
57.1	44.7	35.3	144.4	144.7	669.7			118			57.6	97.3																				18.311	10.681	7.324	12.817	10.376	12.817			7.019			11.902	25.94
221.3	729.7	19.2	87.3	190.3	593.2			50.8			638.6	50.5																				10.376	9.46	6.714	25.33	12.512	13.123			9.155			10.986	13.123
59.2	481.9	78.5	74.5	252.2	52.8			36.6			115.3	40.1																				29.602	7.935	16.785	15.869	11.597	7.629			8.85			8.24	13.428
44.8	85	80	90.2	1026.3	205.9			441.3			344.7	394.6																				17.09	28.076	19.226	12.512	11.902	8.24			6.104			12.207	7.629
324.9	227.6	47.4	170.7	78.7	1345.5			102.1			58.9	24																				11.292	11.292	13.733	12.512	6.714	10.071			7.324			9.766	16.174
38.1	380.2	177.5	180.2	1.6	61.7			228.6			308.4	75.5																				28.687	9.46	18.616	7.935	11.292	10.071			24.719			7.935	11.902
102.1	341.9	34.4	37.2	439.6	749.5			100.9			530.5	298.5																				11.292	13.123	10.071	7.629	7.019	9.155			25.024			10.376	8.85
391.2	43.7	26.6	84.6	318.2	691.2			26			140.2	91.5																				25.024	8.85	11.292	7.629	10.376	12.207			9.46			8.85	9.766
167.2	272.1	17.3	190	174.3	69.6			47.3			305.1	267.1																				10.071	15.564	18.616	13.123	7.935	8.24			25.94			8.24	8.85
70.4	80.1	75.4	302.6	134.2	1017.8			604.1			290.5	218.9																				17.395	19.836	22.278	12.512	12.512	7.629			23.804			9.766	13.733
207.2	139	912.2	93.3	302.9	509.4			291.9			41.4	396.7																				12.207	21.057	28.076	8.24	7.019	7.324			6.104			9.155	12.512
258	60.7	210.2	40.2	299.4	17.7			89			126.9	37.9																				10.071	8.24	22.888	9.46	7.019	7.935			13.123			7.629	9.155
189.4	346	177.8	174.9	243.3	2107.4			107.7			1141	178.5																				14.038	13.123	7.019	11.902	25.024	13.733			16.479			9.155	23.804
38.9	314.9	15.1	119.2	355.2	1275.5			32.5			533.9	175.9																				15.869	8.545	12.512	12.817	14.954	19.226			10.681			8.545	11.597
43.4	37.4	74.3	191.4	230.1	295.2			90.5			47.6	257.9																				20.447	18.616	10.986	7.629	9.155	17.09			7.935			10.681	9.46
261.3	60.5	137.2	265.1	457.6	96.8			177.2			255.6	35.6																				15.869	18.311	10.071	8.24	9.766	9.46			6.409			14.648	15.259
47.8	126.8	53.9	183.3	330.8	451.4			311.3			414.7	160.8																				11.902	14.954	15.564	8.85	9.766	7.324			25.024			7.935	7.935
183.2	259.2	135.5	241.6	268.5	139.3			392.8			262.7	132.5																				35.4	11.902	30.518	7.629	13.123	12.817			6.714			7.629	11.597
179.4	232	58.4	181.9	90.6	582.2			336.7			188	72.5																				23.499	16.479	7.019	7.935	10.986	11.902			7.629			11.292	11.902
34.5	99.3	42.3	429.4	350.6	603.5			86.5			53.9	154.3																				9.766	9.766	15.869	7.935	26.855	23.499			6.714			7.629	24.719
121	266.2	54.1	125.3	103	35.8			332.4			231.7	155.3																				17.395	14.648	8.24	8.545	7.629	14.343			39.063			8.545	31.433
58.3	1100.2	38	172.9	399.9	224.5			74.7			224.9	79																				18.005	9.766	8.85	15.869	11.292	9.155			6.714			11.597	8.85
106.7	471.2	157.2	129.7	202.6	445.4			299.6			43.9	74.6																				26.55	8.545	22.583	25.024	20.447	8.545			7.629			7.935	35.095
58.4	472.3	184.8	193.8	37.3	2521.8			755.8			375.3	164.5																				15.869	8.24	9.155	7.629	7.935	8.24			12.207			10.071	30.823
31.6	337.9	35.1	150.9	817.4	149			258.3			157.6	160.6																				23.499	45.166	14.954	13.123	17.7	8.545			9.155			13.733	9.766
176.5	458.3	99.6	58.5	153.1	229.8			108.7			194	53.5																				18.616	10.376	9.766	7.629	7.019	7.935			7.324			7.629	45.166
43.1	52.7	17	18.9	86.6	203.5			228			15.8	80.9																				12.817	9.46	15.259	7.629	18.921	18.311			6.104			13.123	13.428
55.3	271.3	118.4	57.5	265.9	408.1			272.8			458.9	25.4																				15.564	7.935	13.123	14.648	9.766	12.207			17.09			8.85	14.648
26.1	93.1	67.4	45.9	220.4				230.7			175.1	301.9																				27.771	33.875	9.766	11.597	16.479				7.019			9.766	10.681
204.9	45.8	43.1	132.3	22				744.5			80.2	175.8																				27.161	20.447	14.038	23.193	9.155				6.104			9.155	21.973
105	410.3	84	117.3	349.3				192.3			1112.9	247.5																				17.395	13.428	16.174	15.564	6.104				9.46			7.324	7.324
111.2	178	104.6	340.2	114.7				174.8			268.2	129																				23.804	26.245	23.499	6.409	8.85				14.343			7.629	10.986
94.3	577	37.9	22.6	171.8				358.1			81.5	29.2																				10.681	20.447	13.733	14.954	7.629				20.142			7.629	11.597
132	651.7	100.8	55.6	766.7				100.7			78.6	604.9																				10.681	10.986	14.343	15.564	12.207				23.499			12.207	12.817
219.9	329	88.1	43	131.9				168.9			457.6	16																				18.311	16.174	7.629	7.019	12.512				17.7			11.902	9.766
86.9	53	75.3	489.2	399.9				164.1			145.7	150.9																				20.752	10.681	6.714	9.46	7.629				15.564			12.512	18.921
89.8	504.3	47.2	20.5	310				32.5			381.1	116.3																				22.888	9.46	23.499	12.512	12.207				30.212			9.155	13.123
103.7	242.1	84.1	450.2	144.7				472.5			98.6	80.5																				13.428	9.155	8.545	13.733	6.104				12.207			8.24	23.804
39.6	217.9	95	69.4	368				62.1			134.1	270.1																				22.888	19.836	7.324	14.038	6.409				6.409			7.629	8.24
24.6	54.4	54.3	178.8	18.6				115			43.2	450.6																				22.888	8.85	9.155	7.324	7.019				8.85			8.85	25.024
373.2	124.6	164.5	28.4	130.6				259			127.2	381.3																				11.292	20.447	12.207	7.324	12.512				28.992			8.545	13.123
17	670.2	45.4	142.6	309.7				200.1			529.1	134.2																				21.057	16.785	12.817	16.785	9.766				14.343			9.46	28.992
239.1	180.5	138	101	43.4				81.1			211.1	134.6																				11.292	7.629	11.597	9.155	27.466				7.629			12.512	14.038
266.6	386.4	186	123.7	83.1				428			601.5	86.6																				30.518	9.766	7.935	7.629	9.766				11.292			9.46	7.629
90.6	141.9	33.9	328.5	389.8				1001.6			312.5	363.6																				17.395	8.24	21.362	7.019	25.024				22.583			10.071	16.479
15	351	312.2	27.3	86.9				57.4			47.4	114.1																				21.057	16.785	24.719	11.292	7.935				9.46			7.324	12.817
55.4	1168.7	1.3	171.9	469.5				184.1			292.1	68.4																				58.289	20.447	25.94	14.343	7.324				25.024			10.986	9.766
125.9	183	146.9	16.8	353.1				66.1			38.9	39.9																				21.362	20.142	17.09	20.447	6.714				12.207			9.155	7.324
23.1	370.2	29.4	46.5	81.5				178.3			684.9	131.3																				21.973	10.681	12.817	22.278	7.019				14.954			7.324	14.343
356.6	405.3	58.3	60.7	328.4				23.5			63.1	119																				17.395	13.428	10.681	24.414	7.629				6.104			8.24	10.376
78.8	31.4	48.3	336.9	34.3				111.8			313.4	144.7																				27.161	8.545	12.512	10.376	8.545				8.545			8.85	7.019
29.2	23.5	210.3	197.6	350.8				11.8			219.2	354.3																				15.259	30.212	9.766	7.935	9.46				9.155			10.681	13.428
116.2	549.9	15.6	134.4	348				139.3			1121.2	82																				11.597	8.85	10.986	8.545	7.324				6.104			9.155	8.24
116.4	162	14.1	317.9	117.3				54			77.2	27.8																				30.212	7.935	20.752	10.071	8.24				12.207			7.935	7.629
13.8	83.4	126.9	137.5	270.3				137.4			84.9	299.7																				22.888	15.564	25.33	12.512	14.038				13.428			8.24	10.681
382	32	334	50.7	667.2				212.9			83.4	129.1																				10.376	31.128	14.648	19.836	21.362				7.324			12.817	25.024
67.5		12.6	68.5	79.1				94			840.3	135.8																				14.038		16.785	14.038	11.902				11.292			10.071	9.46
21.1		144.1	336.4	36.3				102.7			43.8	34.4																				9.46		10.681	8.85	7.019				8.85			8.545	10.681
109		161.3	29.8	21.9				157.8			422.4	366.4																				14.648		7.935	22.278	10.376				20.752			10.071	20.142
478.9		55.6	54.7	143.6				75.2			635.6	66.5																				16.479		7.019	9.46	7.324				10.376			11.597	7.324
62		10	68.5	73.5				34.9			264.2	212.1																				31.128		9.155	9.155	6.409				12.817			7.629	14.648
18.3		18	12.3	25.1				107.7			34.7	92.6																				10.376		16.785	6.409	7.324				28.381			8.545	26.245
36.9		75.3	305.6	105.4				124.8			29.8	510.8																				17.395		9.155	17.7	12.817				11.292			12.817	8.545
39.3		151.8	90.7	46.3				142			381.5	81.1																				24.414		11.597	25.024	25.94				7.324			8.85	17.09
35.3		74.3	62.6	348.8				294.8			415.3	283.3																				36.011		18.921	8.24	7.019				6.409			11.902	13.428
59.6		73.2	182.5	524.9				1097.6			40.3	128.7																				20.752		58.289	7.019	7.324				6.714			7.324	16.174
61.9		29.3	67.1	501.1				98.5			178.7	69.4																				36.011		10.986	8.85	11.902				32.349			9.155	10.376
117.6		144.6	295.5	79.5				190.5			190.2	114.6																				21.057		25.024	10.681	7.324				14.343			8.85	49.438
69		202.6	90.9	222.2				87.1			115.1	26.4																				33.569		15.564	7.629	11.292				8.85			8.85	10.986
17.8		248.9	121.9	565.9				23			133.3	406																				23.193		11.292	19.226	14.038				47.913			8.24	7.019
65.3		79.6	34.4	137.8				192.7			88	57.9																				14.343		15.259	9.46	15.869				6.409			8.545	18.616
41.2		239.8	129	172.8				164.5			41.9	169.5																				10.986		14.648	14.343	13.428				12.512			11.902	7.019
60.5		32.2	74.4	78.2				773.3			119.9	23.1																				11.902		65.308	8.545	7.019				9.155			7.935	8.24
234.6		52.1	14.2	58.2				118.9			562.4	111.8																				12.207		27.771	15.564	7.935				18.311			10.681	29.297
193.6		60.8	154.7	319.5				38.5			564.9	176.2																				67.749		9.155	14.038	7.629				13.123			9.46	12.817
75.3		50.6	114.2	348.3				101.6			215.3	185.5																				11.597		7.019	7.019	14.648				7.324			12.817	9.46
251.2		366.4	137.6	401.8				654.6			85.1	106.6																				20.447		18.005	9.155	12.817				7.324			16.174	18.616
42.7		14.6	77.9	42.8				317.5			46.7	158.1																				30.212		15.259	9.155	14.954				6.104			7.324	14.038
66.9		14.7	81.2	31.5				52.5			37.5	321.9																				9.46		9.46	16.174	10.681				14.038			8.545	8.24
131.9		17.9	219.7	131.5				39.8			589.5	176.7																				13.733		16.479	17.09	6.409				7.019			13.733	7.324
14.7		961.4	112.5	76.1				32.4			144.8	52.7																				24.719		7.324	14.648	14.343				15.564			9.155	14.038
143.3		16.8	94.4	270.9				179.2			104.5	74.6																				15.869		39.673	16.174	11.292				8.24			7.935	12.512
24.9		46	142.8	277				267.4			87.8	117.8																				10.681		7.019	10.986	9.766				6.409			7.324	11.902
178.3		137.6	86.9	254.4				397.9			28.9	28.2																				28.381		8.545	20.447	12.207				7.019			9.155	21.667
134.3		211	41.1	297.9				31.2			359.7	456.6																				36.316		15.564	13.428	10.986				21.973			7.629	9.766
118.7		15	229.1	474.7				261.2			817	138																				17.395		10.376	14.954	9.46				24.719			16.174	17.09
129.7		93.8	86	181.4				291.5			800.4	80																				10.986		7.019	16.479	6.104				8.545			14.343	21.667
76		189	73.3	338.4				328.6			734.3	136.7																				27.161		9.766	17.09	11.292				6.409			9.766	9.155
10.8		54	227	46.7				40.5			98.9	846.8																				17.09		25.635	17.7	10.986				7.324			8.545	29.602
110.8		176.6	205.8	216.7				164.5			21.5	352.9																				13.123		14.343	7.324	6.409				8.545			10.071	14.038
79.3		122.8	12	206.9				179.1			132.7	164.3																				10.071		43.64	11.292	10.986				10.071			8.24	14.648
186.7		134	128.6	35.7				401			262.3	23.7																				18.921		10.376	8.545	6.714				8.545			10.071	8.85
128.4		122.5	142.2	99.1				136.1			238.9	64.1																				19.836		8.545	10.376	10.376				14.343			8.24	11.902
205.2		28.4	515	319.6				34.6			168.3	43.7																				13.428		27.161	8.85	11.292				15.869			8.545	14.648
32.9		109.6	186.3	319.3				32.4			258.5	315.5																				10.681		44.556	11.902	7.019				14.954			8.545	14.954
53.2		32.4	22.6	199.6				105.1			252.7	40.6																				14.954		24.414	8.545	8.24				11.597			7.629	14.648
58.8		33.2	101.2	111.2				25.3			109.1	146.1																				22.888		10.986	14.648	9.46				7.324			8.24	7.935
111.3		110.9	463.5	60				70.9			42.4	19.4																				14.343		10.986	10.986	9.46				6.104			9.46	7.324
433.1		161.9	46.1	313.9				285.8			60	684.7																				32.959		18.616	13.428	6.104				9.155			17.09	10.681
496		299.6	22.6	202.8				187.2			411.3	60																				20.752		7.324	8.545	11.902				15.259			8.545	10.681
66.9		108.8	204.5	169				59.5			28	39.8																				15.259		32.043	14.038	8.545				6.409			7.935	15.564
326.3		91.6	207.7	149.3				672.5			397.2	26.4																				23.499		10.681	15.259	16.174				6.409			14.648	13.123
45.1		91.5	25.6	208.4				29.6			168.1	193																				18.311		19.226	9.766	6.714				12.207			17.395	8.545
14.2		348.3	30.4	30.9				62.5			24.9	55.3																				13.428		8.85	11.292	6.714				17.7			7.324	8.85
87.2		62.6	134.7	133.5				175.5			101.9	202.5																				13.733		14.038	10.681	17.7				38.452			10.681	9.155
20.2		640.2	237.4	24.7				251.4			0	54.4																				9.766		25.33	20.752	6.714				21.973			10.681	8.24
320.7		274.3	81.6	383.1				45			165.3	338.8																				12.512		9.155	7.324	25.94				6.409			8.24	7.629
38.8		20.5	117.7	382.1				94.7			629.1	96.2																				17.395		6.714	12.512	8.24				7.019			10.376	9.766
231.5		67.4	297.6	129.5				182.8			74.1	57																				15.869		7.935	21.057	6.714				10.986			10.681	8.545
163.9		94.8	34.3	583.7				312.2			229.3	96.3																				13.733		14.648	8.545	9.766				18.921			12.207	11.292
101.7		85.3	15.3	200.7				214.1			170.1	26.8																				14.038		15.869	8.545	10.681				18.311			12.817	16.785
44.3		190.6	403.9	65.1				226.4			400.2	80.9																				18.616		14.343	10.071	15.564				7.019			7.629	26.245
188.6		241.8	11.3	1246.5				56.9			19.9	229.7																				10.681		13.428	7.324	10.681				18.921			8.85	9.766
66.1		101.2	156.7	157.6				62.9			71.5	139.4																				11.597		14.954	24.109	7.629				7.935			7.629	14.038
132.7		83.8	188.4	233.7				52.8			176.6	43.3																				11.292		7.629	9.155	8.85				37.842			11.292	8.545
65.7		43.3	303.7	372.9				22.9			103.5	140.5																				18.616		14.343	7.629	8.545				13.123			9.46	17.7
24.7		269.7	45.1	180.3				38.9			372.3	261.3																				11.292		15.259	6.409	9.155				17.09			9.155	25.024
164.8		334.6	102.6	94.6				1352.7			392.3	589.6																				16.174		19.836	18.921	27.161				19.226			7.324	11.902
150.6		132.4	117.4	84.6				40.4			154.9	91.6																				23.193		56.152	10.681	6.409				6.409			8.24	12.512
142.4		70.8	595.8	150.7				130.3			68.3	103.6																				13.428		12.817	31.738	8.85				36.926			7.629	11.902
125		189.2	121.9	695.5				342.6			24.6	78																				18.005		18.311	7.324	27.466				10.376			14.648	13.733
113.7		220.2	96.3	88.8				278.9			680.5	209.2																				10.376		35.095	8.545	20.752				6.104			8.85	7.019
88.5		200.4	32.4	241.7				244.3			393.9	70.7																				15.259		12.512	7.019	6.409				8.545			8.24	15.869
37		119.6	13.7	70.5				293.8			841.6	65.5																				10.376		7.019	9.766	7.629				7.629			10.376	13.123
24.2		117.4	34	125.4				64.7			234.2	124.4																				10.071		11.597	9.766	6.104				12.512			7.935	25.94
23.5		88.7	103.4	88.7				107.7			61	92																				16.174		32.959	11.597	10.681				7.019			9.155	9.46
26.9		71.8	0	80				361.6			436.8	127.2																				22.278		15.259	11.597	10.681				10.681			8.24	24.414
18.5		24	554.2	327.2				214.2			58.7	217.4																				20.447		16.479	8.85	13.428				10.986			18.921	13.733
173.5		146.4	162.3	312.5				78.2			185.4	33.4																				22.278		15.259	11.597	17.395				6.714			8.24	15.869
187.3		138.1	13.5	0				83.3			106.2	332.7																				15.259		8.85	10.376	17.395				30.823			12.817	18.616
208.8		229.5	99.8	391.7				81.1			529.6	113.5																				15.259		16.479	14.343	7.019				6.714			7.324	17.09
12.6		46.7	87.4	225.9				266.7			120.5	507.3																				18.311		14.954	6.714	8.545				16.174			8.545	8.85
235.3		113.4	187	317.6				493.1			40.4	80.7																				17.09		9.766	9.46	16.174				17.09			9.155	18.616
136		120.7	153.8	26.2				50.8			216.4	239.7																				14.038		8.85	18.005	6.714				8.24			10.681	8.24
129.8		268.3	163.5	183.7				16.9			476.7	104.3																				27.466		8.24	9.46	7.324				6.714			12.512	14.954
34.5		227.5	59	166.1				97.4			259.3	129.1																				11.292		18.616	14.648	12.207				10.986			9.155	13.123
146.2		1024.3	40.5	741.6				561.7			98.3	130.7																				10.376		9.46	7.324	13.733				10.986			9.155	9.46
16.6		283.2	75	425.4				198.2			72.2	115.1																				12.207		10.376	11.292	7.935				6.104			8.545	36.926
105.9		417.5	71.1	171.5				35.1			157.8	63.5																				16.479		31.433	20.447	24.719				6.104			9.46	8.24
163.7		32.2	128.2	344.7				62.6			152.7	439.2																				13.733		21.973	7.019	21.362				6.104			9.766	10.071
8.2		63.3	37.5	23.6				68.4			327.8	159.4																				12.207		9.46	10.986	8.85				11.292			9.766	12.207
17.7		324.8	209.5	35				410.3			461	88.5																				32.349		10.986	8.85	13.123				6.104			9.155	7.935
32.2		44.2	21.9	54.5				24.5			67.3	26.7																				12.207		10.986	9.155	9.155				15.259			7.629	12.512
87.6		172.2	66.3	50.7				353.9			93.6	511.8																				14.648		7.629	7.324	6.104				7.629			8.24	9.155
75.8		52.1	457.5	241.5				178.8			137.1	197.7																				10.071		37.842	7.935	6.409				6.409			11.902	7.019
465.8		114.5	57.5	654.1				251			197.7	49.8																				19.226		8.85	7.019	17.7				23.499			7.629	9.766
196		36.9	138.5	79.2				118.8			153.3	65																				19.531		15.564	7.324	6.409				8.85			12.207	10.376
84.3		49.7	52.7	400.6				477.4			122.2	325.4																				19.836		18.311	10.071	10.681				6.714			8.85	14.343
185.5		31.1	43.2	264.9				55.9			24.4	109.8																				10.681		59.509	11.292	13.428				8.24			7.629	11.292
22.8		415.8	44.7	335.3				236.2			426.6	106.1																				21.362		20.142	7.629	15.869				19.226			10.071	9.46
84		60.4	117.8	59.2				59.2			72.9	132.3																				27.771		16.785	6.409	11.902				8.85			10.986	7.324
390.6		36.1	21.2	220.5				54.2			454.9	100.7																				23.804		9.155	10.986	7.935				7.324			8.24	18.005
44.9		16.4	49.3	29.4				239.5			412.7	427.6																				25.024		10.071	13.428	6.409				7.019			7.324	27.771
70.8		113.4	105.5	110.3				177.2			218.4	236.7																				16.479		10.681	13.123	7.019				15.869			7.629	10.376
24.9		101.9	131.9	22.3				98.7				496.6																				10.681		18.921	7.324	9.46				11.292				21.667
28.6		44.7	31.1	172.8				92.8				31.4																				14.343		22.583	13.123	28.687				8.24				11.902
444.4		22.8	363.6	0.7				15.8				482.2																				21.667		8.85	8.24	28.992				15.564				20.447
28.4		304.5	66.6	407.5				62.2				33.1																				19.226		25.024	8.85	7.324				7.019				9.155
269.5		87.9	297.4	149				139.5				51.1																				13.733		51.27	10.986	10.071				8.545				12.207
82.2		110.5	37.7	283.3				487.5				241.8																				12.207		7.019	8.24	8.85				8.24				9.766
62.4		38	188.2	114.7				115.4				62.4																				10.986		11.597	15.564	14.343				10.681				7.324
52.5		310.4	20.2	56.2				64				121																				11.902		11.292	12.207	15.564				6.104				8.24
136.6		647.8	204	33.6				433.7				627.9																				11.292		6.714	7.629	8.545				15.564				7.629
14.2		109.6	551.1	180.5				324.3				82.2																				13.428		10.071	11.902	14.038				10.071				11.597
211.5		59.4	380.6	55.7				603.1				55.8																				14.038		17.395	7.019	6.104				6.714				7.935
27.9		19.5	22.2	0				106.5				102.3																				15.869		9.766	6.409	6.104				6.409				11.597
168.6		110.8	433.8	554.1				115.4				320																				11.902		11.292	9.155	6.714				10.986				8.85
59.2		91.8	100.3	17.9				261.2				28.7																				14.343		10.071	8.85	7.324				7.019				10.986
88.4		31.2	95.3	352.2				582.3				84																				22.583		19.531	12.207	7.935				20.447				12.817
41.3		151.7	96.4	250.6				249.6				38.1																				19.531		16.479	7.019	10.071				21.057				13.428
67.8		27.4	124.7	122.5				55.7				86.3																				22.888		20.142	12.817	8.24				11.292				11.902
79.4		322.9	438	254				171.3				22.7																				13.733		14.038	6.714	6.409				7.019				21.667
91.7		56.8	31	296.9				397.4				96																				20.447		15.869	9.155	6.409				6.714				7.324
129.9		12.2	116.4	58.9				348.1				94.4																				13.428		15.564	11.292	7.324				8.545				8.24
30.4		25.3	219	591.7				28.6				75.2																				47.302		7.935	9.46	7.629				6.714				7.019
34.1		207.6	65.1	178.4				68.6				50.6																				24.414		21.667	12.817	7.324				11.902				14.648
315.1		68.7	67.7	244.6				100.9				61.2																				21.973		14.954	7.019	6.409				6.409				15.259
95.8		132.2	20.1	134.7				144.6				19.8																				11.292		13.733	10.986	6.104				16.174				13.123
30.8		555.7	226.7	70.6				206.1				44.5																				18.311		31.128	18.616	16.479				6.409				19.226
8		162.8	99.9	118.1				669.7				163.9																				20.142		18.616	17.09	7.019				9.46				15.564
107.8		12.8	108.1	91.2				673.2				158.3																				24.109		14.648	9.155	11.597				7.935				9.46
23.1		183.1	63	81.5				150				159.7																				9.46		9.766	7.019	14.648				20.142				12.817
225.7		290.7	53.5	112.8				359.3				96.8																				16.785		7.629	7.935	10.071				13.733				9.46
451.2		201.2	35.4	76.9				321.7				208.7																				13.428		20.142	24.414	13.123				6.104				29.297
347.6		501.1	49	223				357.2				66.3																				10.376		12.207	14.648	7.629				23.193				11.292
55.8		245.4	307.2	37.3				101.8				82.7																				11.902		20.142	10.681	6.714				8.85				18.921
71		446.3	195.4	95.5				30.2				169.7																				10.376		17.7	12.817	7.629				39.368				8.85
53.7		23.9	63.9	431				114.6				271.5																				15.259		22.583	21.973	9.766				22.278				8.24
307.8		457.1	37.9	19.4				69.8				114.7																				15.869		8.24	10.071	10.071				6.104				20.752
129.7		59.7	23.9	51.5				19.6				213.3																				15.564		10.376	7.629	6.409				6.714				8.24
22.8		77.5	40.2	32.2				464.7				312.5																				14.648		11.597	14.343	8.545				16.174				13.123
92.3		205.9	354.7	98.7				639.7				219.5																				10.071		30.823	8.85	11.597				6.714				22.888
83		26.8	35.7	112.7				412				40.2																				24.109		7.019	12.207	9.155				7.324				9.155
438.9		429.8	464.3	124.1				49.4				295.6																				9.46		6.714	14.648	9.766				15.869				9.155
30.6		124.3	235.4	237.9				46.2				73.9																				17.7		15.869	11.292	14.954				6.409				12.512
150		159.7	23	113.3				56				75.1																				25.33		10.681	7.019	17.7				15.259				19.531
192.6		103.9	72.4	177.4				499.8				771.9																				9.766		7.629	7.324	8.85				6.104				14.343
31.4		79.5	18.1	97.1				419.4				275.8																				18.005		12.817	17.395	6.714				33.569				11.597
91.7		336.6	226.5	190.9				730.6				347.1																				28.076		28.687	14.038	14.038				6.714				13.428
42.7		73.3	79.9	235.7				29				35.5																				11.902		49.744	9.155	7.324				10.986				14.038
266		146.1	252.1	23.3				81				26.6																				12.512		16.785	10.681	9.766				7.019				9.155
24.5		77.7	128.4	123.2				224.2				685.6																				19.531		21.973	24.719	7.324				8.85				10.376
25.6		253.4	80.7	511.7				263.6				114.6																				13.123		14.343	7.935	8.545				8.545				7.324
149.3		128.1	74.8	120.6				76.9				136.8																				19.531		23.804	20.447	9.155				7.324				7.629
276		392.3	153.6	191.4				438				20.8																				21.667		35.095	10.681	8.24				37.842				14.343
72.8		241.7	147.3	54.1				43.8				83.8																				9.46		17.7	6.714	10.376				6.409				8.545
42		254.3	24.5	496.4				90.9				678.6																				18.311		9.155	10.986	12.207				6.409				16.174
38.1		159.2	360.8	118.9				64.6				168.6																				9.46		12.817	22.583	7.935				16.479				19.531
25.5		28.3	242.8	72.5				70				47.1																				44.25		18.921	6.409	6.409				17.395				8.545
178		309.9	113.9	151.3				152.1				465.3																				13.733		14.954	10.376	8.85				7.629				15.564
232.5		72.9	272	105.1				865.5				60																				21.362		28.687	13.733	18.921				8.24				8.545
171.7		48.4	253.4	182.8				185.4				217.9																				18.921		11.292	9.155	10.376				7.324				7.935
36		61.5	530.2	177.2				414.2				303																				16.785		7.019	13.123	16.785				6.714				12.817
429.8		23.8	62.3	136.2				53.2				193.5																				10.986		19.531	10.681	11.292				37.231				10.681
56		135.6	64.3	258				598.2				33.6																				14.954		12.207	8.85	12.512				28.076				15.259
69.8		13	100	296.6				66.8				201.6																				20.142		12.512	10.376	11.597				6.409				8.24
286.1		74	155.1	122.8				121.7				167.4																				26.855		11.597	15.259	14.954				15.259				8.24
38.3		45.3	82.7	1589.7				129.2				216.3																				20.447		17.395	9.766	11.902				23.499				7.629
77.7		46.7	197.3	61				302.3				77.6																				14.954		11.902	10.071	36.621				9.46				9.155
84.3		522.5	89.7	142.3				65.7				523.6																				10.681		11.597	7.629	12.817				14.648				18.921
39		19.4	39	135.4				0.6				44.5																				20.142		16.479	7.629	16.785				14.954				14.038
37.7		163.8	25.1	115.8				357				296.1																				18.921		14.343	14.038	6.409				25.33				13.428
341.1		54.4	322	146.5				155.6				387.7																				25.33		10.071	11.597	12.512				6.104				8.24
135.8		18.3	22.2	93.9				390.1				186.3																				22.583		10.376	9.155	8.24				16.174				20.447
53.8		126.2	262.6	675.1				82.9				129.5																				9.766		32.654	13.428	12.207				6.409				14.038
258.8		50.3	424.8	450.3				56.6				391.8																				20.752		20.752	22.888	17.395				17.7				7.324
20.9		96.5	394.8	388.6				148.2				19																				20.447		27.466	8.545	6.409				8.24				18.311
84.2		73.7	251.5	344				127				180.6																				19.836		19.836	15.564	10.681				10.681				7.019
145.1		41.6	48.7	194.2				241.9				38.8																				18.921		7.935	6.714	9.766				14.648				27.466
95.2		65.1	35.9	27.7				191				209.1																				12.512		16.479	7.935	15.259				15.259				12.512
102.7		88.7	88.3	76.9				457.3				86.2																				25.33		11.597	10.376	17.09				9.766				33.264
313.4		58.5	33.4	40.5				86.1				223.9																				10.681		7.935	9.766	10.681				6.409				14.648
83.8		338.5	108.7	132.7				86.1				40.8																				17.09		6.714	21.667	7.019				7.629				18.921
21.3		21.3	148.3	151				477.3				112.8																				18.616		15.259	22.278	9.155				40.588				7.324
138.7		71.6	269.2	145.6				255				370.8																				17.7		23.499	9.766	12.512				25.635				11.902
23.4		32.1	177.9	73.9				21.5				72.8																				32.349		19.531	8.24	7.935				6.714				24.719
225		217.6	32.2	146.1				396.8				67																				22.888		30.823	11.902	9.46				10.071				9.46
365.4		29.6	38.5	41.3				937.9				182.3																				25.024		13.733	6.714	18.005				16.174				12.512
295.7		66.2	34.8	32.3				66.1				245.1																				14.038		19.836	7.935	6.104				7.019				10.681
33.8		306.1	84.5	26.9				341.9				34.2																				10.681		12.817	7.629	9.46				7.629				9.766
123.4		317.3	72.6	277.9				766.5				308.1																				28.687		7.019	6.409	26.245				6.104				14.038
44.7		280.7	217.9	354.5				207.3				35																				11.292		16.785	14.648	11.597				25.635				12.207
84.7		29.1	62.3	242				610.6				44																				28.992		14.648	10.071	6.409				6.409				10.071
102		135.8	180.5	360.7				193.6				389.9																				15.259		8.24	11.597	18.311				8.24				23.193
11.7		182.6	272	360.2				30				75.6																				22.583		10.986	7.019	8.24				6.409				7.629
277.4		59.2	234	408.6				697.6				224.3																				13.428		9.766	12.512	9.46				7.629				29.907
45.4		268.5	40.1	450.1				233.6				126.1																				10.986		11.902	12.817	6.409				7.629				15.869
89.9		249.9	59.9	140.3				265.7				94																				27.466		8.24	12.207	10.986				6.714				10.681
51.9		78	19.9	110.6				146.4				420.2																				12.207		32.349	10.376	7.324				7.935				11.292
28.5		263.4	27.2	1428				190.5				294.2																				11.597		21.667	13.123	12.207				7.629				9.155
139.4		755.2	72.9	121.1				245.6				107.1																				13.123		19.836	16.174	19.836				16.785				7.935
40.5		40.9	505.8	385.6				112.7				391.9																				21.973		8.545	12.817	18.005				15.564				17.395
130.5		50.3	128.1	199.3				157.3				59.5																				19.531		8.545	8.545	10.376				9.766				16.479
71.8		34.9	184	408				188.4				415.2																				14.648		12.512	17.09	7.324				12.207				7.935
199.4		77.1	46.1	627.5				164.1				49.4																				10.986		22.888	10.071	7.629				11.597				9.155
167.3		395.5	15.7	377.9				398.1				108.3																				10.986		7.935	7.629	12.512				9.766				7.019
32.1		129.4	138.9	67.8				59.3				416.8																				27.771		6.714	15.564	7.935				7.629				42.419
71.5		175	97.4	399				520.3				897.9																				9.766		22.278	7.019	8.545				9.155				13.733
30		144.3	91.1	853.5				218.2				445.1																				10.071		51.27	10.071	10.376				8.24				8.545
35.2		53.1	74.4	195.3				12.7				276.5																				9.46		31.738	14.648	6.714				11.902				9.766
202		27.5	120.7	192.8				19.1				133																				16.174		18.311	9.766	8.85				7.935				10.071
17		183.6	162.5	58.5				307.6				196.9																				10.071		10.986	15.564	7.629				14.343				10.376
25.9		139.3	359.7	64.5				390.3				32.3																				19.226		7.019	14.648	7.324				6.104				18.311
84.3		170.6	156.2	130.2				161				245.7																				20.752		16.785	6.714	7.324				12.207				11.597
33.3		359.4	92.7	209.9				202.4				34.8																				14.648		17.09	6.714	11.597				6.409				8.24
87.4		116.5	37.6	33.6				754.4				261.2																				25.024		14.954	8.85	8.85				13.428				7.324
87.2		19.9	19.7	469.2				200.7				48.7																				10.376		10.071	9.46	20.752				9.46				13.123
52.5		31.2	390.5	105				18.8				116.7																				20.752		24.109	9.766	14.343				7.324				8.85
70		29.7	67.5	75.2				26.3				304.7																				28.992		7.324	18.311	19.836				10.986				14.954
64.5		126.8	299.6	187.9				372.4				945.3																				10.071		15.259	7.935	26.855				21.973				24.414
27		123.7	46.3	254.5				994.9				166.4																				18.921		12.207	10.071	6.409				16.174				8.85
372.2		347.7	207.3	29.7				747.6				211.7																				31.433		11.902	10.376	7.935				7.324				17.09
20.2		32.1	222.5	81.8				176.9				336.6																				9.766		13.428	9.766	9.766				10.376				13.428
66.5		230.7	127.6	306.1				182.6				103.1																				11.292		15.564	6.409	8.85				9.155				15.564
100.8		117.8	171	148.4				32.1				273.3																				15.564		69.885	7.629	8.85				8.545				10.376
424.8		277.4	192.3	72.7				193.1				277.8																				17.7		12.817	9.766	6.409				9.766				7.324
49.6		168.9	49.2	368.6				150				184.3																				10.071		16.785	9.155	8.545				16.174				7.019
48.3		157.6	504.6	11.3				546.7				50.1																				15.869		15.869	7.324	7.935				7.629				8.545
75.6		243	336.1	272.3				271.6				104.3																				34.18		31.738	9.155	18.616				18.921				28.992
153.2		388.6	282	460.4				49				91.3																				10.071		17.09	10.376	12.207				8.24				7.629
88.9		62.9	13.7	64				281.8				102.9																				12.817		38.147	7.935	10.681				9.46				17.395
147		112.1	44.6	127.2				21.2				223.4																				21.057		13.733	13.733	6.714				6.409				20.752
55		24	184.6	245				462.5				819.7																				9.46		9.155	11.597	16.785				8.545				14.954
404.7		73.6	285.1	49.6				119.2				398.2																				11.902		7.019	17.09	11.597				10.071				10.376
16		43	18.1	520				67.1				86.8																				16.785		8.85	6.714	10.071				8.545				10.986
78.8		250	603.8	29.4				111.2				108.7																				25.635		29.602	9.155	10.681				6.104				7.629
221.6		97.8	124.5	202.5				31.2				46.6																				17.09		8.545	19.226	10.681				7.019				7.629
66.7		75.6	73.6	42.3				169.5				29.4																				27.466		21.973	10.376	10.376				6.714				17.09
31.3		51	117.2	1021				254.3				68.9																				14.038		28.076	6.409	11.902				9.155				14.038
76.3		483	175.1	44.3				31.2				63.1																				21.057		24.109	15.869	9.155				6.714				20.142
76.6		24.9	26.3	69.1				798.6				96.9																				16.479		14.343	21.667	6.104				6.104				10.986
308.4		352.2	217	198.9				1.1				218.9																				14.038		33.875	15.869	16.479				9.46				12.512
34.6		172.6	446.5	277.1				778.1				438.5																				9.46		22.583	21.973	6.104				32.349				8.24
192.5		112.6	145	84.9				202.5				244																				30.823		13.428	20.142	9.46				10.376				11.292
42.4		32.9	77	71.9				163.8				30.1																				25.94		8.24	7.935	7.019				6.714				8.545
120.6		159.2	21.5	27.1				250.9				44.7																				42.419		17.395	7.019	6.714				8.545				24.109
84.5		188.4	87.8	52.6				46.6				306.7																				11.597		17.09	9.46	15.869				6.104				15.259
72.4		35.4	167	157				70.2				117.9																				34.79		7.324	10.376	11.292				6.104				44.861
200.7		122.7	264.7	89.7				470.3				83.8																				16.479		56.152	11.597	7.629				6.104				26.55
48.9		99.4	566.6	174.5				25.3				655.1																				21.057		20.447	13.428	6.714				9.155				30.212
177.4		122.8	36.7	301.4				33.4				28.8																				20.142		21.973	14.343	14.648				6.714				9.766
107.3		653	74.1	300.1				29.5				216.8																				10.986		50.659	12.207	7.019				18.616				10.681
12.5		180.7	56.6	33.2				40.7				615																				9.46		18.311	12.817	6.409				7.629				25.33
31		57.7	200.4	125.8				47.2				144.2																				17.7		9.766	10.376	12.207				6.714				21.362
60.6		91.1	148.3	46.2				334.2				111.7																				12.207		14.954	9.155	13.123				16.479				14.954
162.3		126.8	265.9	206.3				177.7				189.8																				15.564		9.155	11.597	13.123				8.85				19.226
32.3		86.9	158.6	88				402.5				53.6																				9.46		6.714	10.681	7.935				10.681				16.479
[truncated: 1,164 more rows]
[truncated: 6 more columns]

## Sheet: Figure3-Figure Supplement 1C
Resting potential of CeA-SST neurons
[truncated: 30 more rows]

[truncated: 3 more sheets: Figure3-Figure Supplement 1D, Figure3-Figure Supplement 1E, Figure3-Figure Supplement 1F]
