# Supplementary material for: Cellular mechanisms underlying central sensitization in a mouse model of chronic muscle pain
Source: eLife. 2022 Nov 15;11:e78610. doi: 10.7554/eLife.78610 (PMC9665847; doi:10.7554/eLife.78610)
Supplement: Figure 3—figure supplement 2—source data 1. [file elife-78610-fig3-figsupp2-data1.xlsx]

## Sheet: Panel B diary plot
AP (mm)	mouse #1	mouse #2	mouse #3	mouse #4	mouse #5	Ctrl mean	Ctrl SEM	Ctrl mouse number
-0.94	4.3333	3.6667	8.66667	8.33333	2.33333	5.46667	0.3333	5
-1.06	8.75	2	2	23.5	3.33333	7.91667	3.375	5
-1.22	8.5	4.75	15.5	11.5	2.75	8.6	1.875	5
-1.34	24.5	6.5	14.25	17	26	17.65	9	5
-1.46	45.667	26.25	37	40.6667	33.25	36.5667	9.7085	5
-1.58	38.333	34.5	48	33.3333	43.8	39.5933	1.9165	5
-1.7	49.333	29	61.3333	45	55.3333	47.9999	10.1665	5
-1.82	31	29.5	27.5	53.5	28.3333	33.9667	0.75	5
AP (mm)	mouse #1	mouse #2	mouse #3	mouse #4	mouse #5	MP mean	MP SEM	MP mouse number
-0.94	22.333	16.6667	18	9	7.66667	14.7333	2.77717	5
-1.06	33.75	15.6667	55.5	14.667	10	25.9167	9.59516	5
-1.22	30	16.3333	32.5	12.5	35	25.2667	4.94838	5
-1.34	35.5	35.75	50	39	41	40.25	5.00456	5
-1.46	43	36.8	44	48	74.6667	49.2933	4.67645	5
-1.58	49.333	34.6	49	53.333	79.75	53.2032	6.56308	5
-1.7	34.5	36.6	57	90	83	60.22	14.2021	5
-1.82	37	32	50	69.5	72	52.1	10.0734	5

## Sheet: Panel B Bargraph
Group	mean	SEM	mouse #1	mouse #2	mouse #3	mouse #4	mouse #5
Ctrl	197.76	16.5271	210.416	136.167	214.25	232.833	195.133
MP	320.983	30.6445	285.416	224.417	356	336	403.08

## Sheet: Panel C diary plot
AP (mm)	mouse #1	mouse #2	mouse #3	mouse #4	mouse #5	Ctrl mean	Ctrl SEM	Ctrl mouse number
-0.94	1	0.3333	1.33333	1.33333	0.666667	0.933327	0.307326	5
-1.06	1	2	0.25	2.5	0.333333	1.21667	0.709068	5
-1.22	1	1	0.75	1.25	0.5	0.9	0.201556	5
-1.34	2	1.25	0.25	0.2	1	0.94	0.529976	5
-1.46	2	1	0.75	0.666667	2.25	1.33333	0.522082	5
-1.58	0.6667	0.6667	0.25	0	1.8	0.67668	0.487596	5
-1.7	1.25	1.3333	0.666667	1	2	1.24999	0.348607	5
-1.82	1	0.5	0.5	1	2	1	0.433013	5
AP (mm)	mouse #1	mouse #2	mouse #3	mouse #4	mouse #5	MP mean	MP SEM	MP mouse number
-0.94	2.6667	4.33333	1.5	1	1.66667	2.23334	0.590669	5
-1.06	2.25	3.33333	1.5	6	1.66667	2.95	0.827312	5
-1.22	2.25	2	1	2.75	4.33333	2.46667	0.546834	5
-1.34	2.1667	4	1.5	2.25	1	2.18334	0.508538	5
-1.46	1.3333	4.2	0.5	4	8.66667	3.73999	1.429	5
-1.58	1.8333	3.2	3	2	5.25	3.05666	0.610231	5
-1.7	1.75	3.8	0.6667	5	4.33333	3.11001	0.817437	5
-1.82	2.75	2.66667	0.5	2.5	3	2.28333	0.453076	5

## Sheet: Panel C Bargraph
Group	mean	SEM	mouse #1	mouse #2	mouse #3	mouse #4	mouse #5
Ctrl	8.22	1.03691	9.9167	8.0833	4.6	7.95	10.55
MP	22.0234	3.67811	17	27.5333	10.1667	25.5	29.917

## Sheet: Panel D diaryplot
AP (mm)	mouse #1	mouse #2	mouse #3	mouse #4	mouse #5	Ctrl mean	Ctrl SEM	Ctrl mouse number
-0.94	2.6667	4	7.33333	7	1.66667	4.53334	1.79969	5
-1.06	1	6.75	1.75	21	3	6.7	5.86488	5
-1.22	3.75	7.5	14.75	10.25	2.25	7.7	3.56283	5
-1.34	4.5	23.25	14	16.8	25	16.71	5.78718	5
-1.46	24.25	44.667	36.25	40	31	35.2334	5.60472	5
-1.58	33.833	37.667	47.75	33.3333	42	38.9167	4.27366	5
-1.7	27.75	48	60.6667	44	53.3333	46.75	8.71162	5
-1.82	29	30.5	27	52.5	26.3333	33.0667	7.76951	5
AP (mm)	mouse #1	mouse #2	mouse #3	mouse #4	mouse #5	MP mean	MP SEM	MP mouse number
-0.94	19.667	12.3333	16.5	8	6	12.5001	2.54847	5
-1.06	31.5	12.3333	54	8.6667	8.33333	22.9667	8.85318	5
-1.22	27.75	14.3333	31.5	9.75	30.6667	22.8	4.4948	5
-1.34	33.333	31.75	48.5	36.75	40	38.0666	2.97182	5
-1.46	41.667	32.6	42.667	44	66	45.3868	5.52975	5
-1.58	47.5	31.4	46	51.333	74.5	50.1466	6.96466	5
-1.7	32.75	32.8	56.333	85	78.6667	57.1099	11.0171	5
-1.82	34.25	29.3333	49.5	67	69	49.8167	8.1402	5

## Sheet: Panel D Bargraph
Group	mean	SEM	mouse #1	mouse #2	mouse #3	mouse #4	mouse #5
Ctrl	189.61	16.9977	126.75	202.334	209.5	224.883	184.583
MP	298.794	30.9131	268.417	196.883	345	310.5	373.17
