# Supplementary material for: Cellular mechanisms underlying central sensitization in a mouse model of chronic muscle pain
Source: eLife. 2022 Nov 15;11:e78610. doi: 10.7554/eLife.78610 (PMC9665847; doi:10.7554/eLife.78610)
Supplement: Figure 3—figure supplement 4—source data 1. [file elife-78610-fig3-figsupp4-data1.xlsx]

## Sheet: Figure 3-Figure supplement 4A
sEPSC frequency in the CeA-SST-ES neurons										sEPSC amplitude in the CeA-SST-ES neurons
Individual data showing the sEPSC frequency (Hz) of each SST-ES cell										Individual data showing the sEPSC amplitude (pA) of eachSST-ES cell
	Ctrl			MP							Ctrl			MP
	cell 1	1.5345		cell 1	2.87						cell 1	22.05		cell 1	21.803
	cell 2	1.08		cell 2	6.88						cell 2	8.8445		cell 2	13.103
	cell 3	1.4		cell 3	4.27						cell 3	11.1		cell 3	20.058
	cell 4	1.1933		cell 4	1.48						cell 4	16.577		cell 4	10.68
				cell 5	4.28									cell 5	16.206
				cell 6	1.75									cell 6	9.3599
				cell 7	2.17									cell 7	14.486
				cell 8	4.65									cell 8	23.909
				cell 9	3.4724									cell 9	22.346
sEPSC frequency in the CeA-SST-LS neurons										sEPSC amplitude in the CeA-SST-LS neurons
Individual data showing the sEPSC frequency (Hz) of each SST-LS cell										Individual data showing the sEPSC amplitude (pA) of eachSST-LS cell
	Ctrl			MP							Ctrl			MP
	cell 1	1.57		cell 1	2.74						cell 1	11.101		cell 1	8.4448
	cell 2	4.42		cell 2	1.94						cell 2	16.435		cell 2	16.216
	cell 3	2.11		cell 3	5.04						cell 3	18.71		cell 3	13.344
	cell 4	1.0833		cell 4	3.5						cell 4	7.5215		cell 4	12.984
	cell 5	5.0333		cell 5	4.6467						cell 5	21.612		cell 5	16.731
				cell 6	9.1633									cell 6	25.045
				cell 7	13.143									cell 7	21.025
				cell 8	2.8655									cell 8	23.99
				cell 9	6.0793									cell 9	13.471
				cell 10	2.8172									cell 10	19.402
				cell 11	2.29									cell 11	15.397

## Sheet: Figure 3-Figure supplement 4B
	sEPSC frequency in the CeA-PKCδ-ES neurons									sEPSC amplitude in the CeA-PKCδ-ES neurons
	Individual data showing the sEPSC frequency (Hz) of each PKCδ-ES cell									Individual data showing the sEPSC amplitude (pA) of each PKCδ-ES cell
		Ctrl			MP						Ctrl			MP
		cell 1	3.5		cell 1	1.78					cell 1	14.6958		cell 1	11.476
		cell 2	8.66		cell 2	0.35					cell 2	20.1733		cell 2	8.2427
		cell 3	1.35		cell 3	3.6367					cell 3	16.4289		cell 3	12.234
					cell 4	1.8667								cell 4	13.795
					cell 5	0.7625								cell 5	13.186
					cell 6	0.9833								cell 6	17.519
					cell 7	2.7967								cell 7	20.736
	sEPSC frequency in the CeA-PKCδ-LS neurons									sEPSC amplitude in the CeA-PKCδ-LS neurons
	Individual data showing the sEPSC frequency (Hz) of each PKCδ-LS cell									Individual data showing the sEPSC amplitude (pA) of each PKCδ-LS cell
		Ctrl			MP						Ctrl			MP
		cell 1	8.31		cell 1	2.23					cell 1	16.965		cell 1	11.917
		cell 2	5.66		cell 2	3.96					cell 2	17.38		cell 2	17.277
		cell 3	7.67		cell 3	1.69					cell 3	18.079		cell 3	9.9371
		cell 4	4.96		cell 4	4.22					cell 4	14.424		cell 4	13.457
		cell 5	2.8767		cell 5	2.04					cell 5	14.311		cell 5	11.475
		cell 6	2.6		cell 6	3.72					cell 6	16.362		cell 6	15.274
					cell 7	0.56								cell 7	8.8248
					cell 8	3.95								cell 8	21.467
					cell 9	3.15								cell 9	21.95
					cell 10	2.7633								cell 10	13.507
					cell 11	1.9033								cell 11	18.855
					cell 12	3.1067								cell 12	21.374
					cell 13	0.64								cell 13	12.097

## Sheet: Figure 3-Figure supplement 4C
Number of spikes in CeA-SST-ES neurons against injected current																			Rheobase of CeA-SST-ES neurons
Ctrl																			Individual data showing the rheobase (pA) of each SST-ES cell
Injected current (pA)	cell 1	cell 2	cell 3	cell 4	cell 5	cell 6														Ctrl			MP
0	0	0	0	0	0	0														cell 1	70		cell 1	70
20	0	0	0	0	0	0														cell 2	100		cell 2	36
40	0	0	0	1	0	0														cell 3	60		cell 3	25
60	1	0	1	13	9	7														cell 4	50		cell 4	35
80	4	0	1	18	22	16														cell 5	38		cell 5	80
																				cell 6	40		cell 6	15
																							cell 7	42
MP																							cell 8	15
Injected current (pA)	cell 1	cell 2	cell 3	cell 4	cell 5	cell 6	cell 7	cell 8	cell 9	cell 10	cell 11	cell 12											cell 9	21
0	0	0	0	0	0	0	0	0	0	0	0	0											cell 10	28
20	0	4	1	0	0	19	0	7	1	0	3	0											cell 11	24
40	0	3	9	7	0	45	6	15	6	5	21	7											cell 12	19
60	0	3	16	21	0	51	8	13	11	13	32	18
80	1		22	24	5	50	21		15	16	39	21
Number of spikes in CeA-SST-LS neurons against injected current																			Rheobase of CeA-SST-LS neurons
Ctrl																			Individual data showing the rheobase (pA) of each SST-LS cell
Injected current (pA)	cell 1	cell 2	cell 3	cell 4	cell 5	cell 6	cell 7	cell 8	cell 9											Ctrl			MP
0	0	0	0	0	0	0	0	0	0											cell 1	30		cell 1	23
20	0	0	1	0	0	0	0	0	0											cell 2	40		cell 2	36
40	5	12	23	0	0	3	0	0	0											cell 3	70		cell 3	66
60	9	32	26	0	0	16	0	7	7											cell 4	26		cell 4	80
80	16	39	38	2	0	26	0	16	15											cell 5	93		cell 5	62
																				cell 6	37		cell 6	24
																				cell 7	90		cell 7	20
MP																				cell 8	50		cell 8	33
Injected current (pA)	cell 1	cell 2	cell 3	cell 4	cell 5	cell 6	cell 7	cell 8	cell 9	cell 10	cell 11	cell 12	cell 13	cell 14	cell 15	cell 16				cell 9	41		cell 9	50
0	0	0	0	0	0	0	0	0	0	0	0	0	0	0	0	0							cell 10	8
20	0	0	0	0	0	1	0	0	0	0	0	2	0	0	0	11							cell 11	21
40	15	0	0	0	0	15	9	9	0	12	0	12	5	0	0	20							cell 12	73
60	35	9	11	0	0	21	19	18	13	21	0	20	14	7	2	27							cell 13	61
80	41	14	16	8	13	25	25		31	28	2	28	19	22	20	31							cell 14	15
																							cell 15	54
																							cell 16	48

## Sheet: Figure 3-Figure supplement 4D
Number of spikes in CeA-PKCδ-ES neurons against injected current																			Rheobase of CeA-PKCδ-ES neurons
Ctrl																			Individual data showing the rheobase (pA) of each PKCδ-ES cell
Injected current (pA)	cell 1	cell 2	cell 3	cell 4																Ctrl			MP
0	0	0	0	0																cell 1	25		cell 1	86
20	1	0	0	0																cell 2	35		cell 2	100
40	19	6	1	12																cell 3	40		cell 3	29
60	34	10	7	21																cell 4	35		cell 4	50
80	45	15	16	22																			cell 5	50
MP
Injected current (pA)	cell 1	cell 2	cell 3	cell 4	cell 5	cell 6	cell 7
0	0	0	0	0	0	0	0
20	0	0	0	0	0	0	0
40	0	0	0	8	0	2	0
60	0	0	1	13	5	11	12
80	1	0	4	17	10	18	12
Number of spikes in CeA-PKCδ-LS neurons against injected current																			Rheobase of CeA-PKCδ-LS neurons
Ctrl																			Individual data showing the rheobase (pA) of each PKCδ-LS cell
Injected current (pA)	cell 1	cell 2	cell 3	cell 4	cell 5	cell 6	cell 7													Ctrl			MP
0	0	0	0	0	0	0	0													cell 1	10		cell 1	58
20	9	9	0	0	0	0	0													cell 2	12		cell 2	58
40	22	24	12	3	0	1	0													cell 3	22		cell 3	72
60	31	33	26	10	0	7	0													cell 4	56		cell 4	36
80		41	34	17	2	12	6													cell 5	50		cell 5	45
																				cell 6	35		cell 6	27
																							cell 7	30
MP																							cell 8	35
Injected current (pA)	cell 1	cell 2	cell 3	cell 4	cell 5	cell 6	cell 7	cell 8	cell 9	cell 10	cell 11	cell 12	cell 13										cell 9	45
0	0	0	0	0	0	0	0	0	0	0	0	0	0										cell 10	32
20	3	0	0	0	0	0	0	0	0	0	0	0	0										cell 11	36
40	11	0	0	6	0	6	11	6	19	0	0	2	0										cell 12	55
60	17	0	0	15	12	16	21	15	25	7	2	8	0
80		7	2	19	20	20	25	22	32	12	9	12	11
