# Supplementary material for: Cellular mechanisms underlying central sensitization in a mouse model of chronic muscle pain
Source: eLife. 2022 Nov 15;11:e78610. doi: 10.7554/eLife.78610 (PMC9665847; doi:10.7554/eLife.78610)
Supplement: Figure 3—source data 1. [file elife-78610-fig3-data1.xlsx]

## Sheet: Figure 3C
Cumulative probability of inter-event interval in the CeA-SST neurons																																sEPSC frequency in the CeA-SST neurons										Cumulative probability of amplitude in the CeA-SST neurons
Individual data showing the inter-event interval (ms) of each cell																																Individual data showing the sEPSC frequency (Hz) of each cell										Individual data showing the amplitude (pA) of each cell
Ctrl										MP																							Ctrl			MP						Ctrl
cell 1	cell 2	cell 3	cell 4	cell 5	cell 6	cell 7	cell 8	cell 9		cell 1	cell 2	cell 3	cell 4	cell 5	cell 6	cell 7	cell 8	cell 9	cell 10	cell 11	cell 12	cell 13	cell 14	cell 15	cell 16	cell 17	cell 18	cell 19	cell 20				cell 1	1.57		cell 1	2.87					cell 1	cell 2	cell 3	cell 4	cell 5	cell 6	cell 7	cell 8
266.906	530	136.9	1967.7	78.7	649.9	945.2	769.4	363.3		751.7	640.906	1607.1	118.6	181.3	105.5	488.3	62.815	413.312	648	253.4	123.1	86.8	124.5	436.6	31.2	207.6	141.9	348.1	35.9				cell 2	1.08		cell 2	2.74					34.0781	7.629	7.629	8.545	29.602	10.986	7.935	21.057
519.797	1080.2	523.8	130.3	145.6	208.5	178.2	112.7	3828.1		75.8	426.188	29.1	540.2	33.4	105.5	17.8	52.6875	236.875	503.8	67.9	88.9	34.4	124.8	202	143.3	52.8	50.4	16.9	232.7				cell 3	1.4		cell 3	6.88					71.7605	43.03	5.188	11.597	31.128	9.155	6.104	25.33
454	236.1	544.2	210.6	364.3	259.6	238.1	207.8	58.5		769.2	397.703	593.5	66.9	212.8	196.688	44.1	261.594	764.312	227.9	476.1	577.5	209.4	1297.4	441.6	72.6	142.8	78.9	34.9	31.5				cell 4	4.42		cell 4	4.27					10.1524	24.109	21.057	6.104	7.019	23.193	10.681	39.063
1257.89	847.7	560.6	86	34.2	153.7	44.4	67	486.8		135.4	52.297	382.9	218.8	118.1	298.438	145.9	171.219	220.375	150.1	174.6	535.9	80.6	130.3	575.2	320.1	579.3	250	96.2	197				cell 5	2.11		cell 5	1.48					8.97005	13.123	5.798	7.019	5.798	8.545	6.409	12.207
141.906	120.9	1383.8	202.9	56.3	1171.1	172.9	242.9	1227.8		709.3	439.312	253.7	41.6	17.2	387.375	382.9	88.2815	1272	156	17.6	34	99.8	350.1	1910.4	123.6	21.5	84.2	77.5	271.3				cell 6	1.53448		cell 6	4.28					17.9548	8.85	6.409	7.629	6.714	37.231	10.681	18.005
489.906	113	149.4	861.2	78.2	865.7	59.7	186.5	830.1		1256.8	141.094	187.9	394.6	13.4	22	320.1	115.594	34.8125	928.4	832.5	346.5	444.4	169.7	888.9	482.3	129.8	95	144.1	396.3				cell 7	1.08333		cell 7	3.5					32.3991	7.935	4.272	5.493	12.512	8.85	9.155	17.09
401.297	125.6	122.5	69	340.6	2524.9	479.2	43.7	1448.5		164.4	541.203	13.3	148.7	144.1	12.875	636	1.21869	185.312	2495	316	252.3	133.6	42.3	641.2	181.6	127.9	97.4	10.8	63.1				cell 8	5.0333		cell 8	2.17					8.20496	9.46	5.493	8.24	7.324	12.512	7.324	13.428
328.891	189.4	143	46.1	119	124.3	1251.3	51.9	1099		127	710.297	150.8	278.9	42.5	83.3125	60.5	67.5	15.5	760.9	201.2	108.4	229.5	388.4	921.8	413.5	88.7	130.6	31.9	117.8				cell 9	1.19333		cell 9	1.75					32.239	12.207	4.578	14.343	21.973	17.7	6.409	26.55
160.906	88.1	295.4	74.3	117.9	648.5	672.8	204.5	1288.4		314.2	96.2031	61.3	84	74.6	483.438	359.9	266.094	67.875	1221.4	793.9	81.6	47.2	304.3	1605.8	573	198.9	102.8	62.5	123.4							cell 10	2.81724					59.1932	9.766	5.188	7.629	41.199	43.64	7.629	11.292
147.297	198.3	1189.3	566.3	586.4	612.9	225.9	66.2	2031.9		184	413.094	557.4	257.4	327.9	551	236.4	135.188	111.438	548	88.7	403.4	171.9	156.3	625.2	540.6	27.9	16.7	67.2	112.8							cell 11	6.07931					14.2614	15.564	8.545	7.324	8.545	22.888	7.935	11.597
729.203	597.6	1163.3	159.1	216.4	138.1	1539.9	270.9	314.4		678.5	940.906	279.1	115.8	22	146.562	55.4	248.219	420.812	646.3	54.7	236.5	307.2	14.2	243.7	62.6	170.9	56.9	159.4	518.7							cell 12	2.86552					9.72203	7.324	6.714	6.104	28.992	9.46	8.545	32.959
510	1205.8	223.2	134.1	288.2	113.4	564.6	439	936.3		771.9	822	189.8	311.2	137	134.438	289.2	217.781	112.188	333	276.1	51.7	292	228.7	2915.1	285.5	84.6	38.5	16.8	20.8							cell 13	3.47241					9.3345	8.85	4.272	17.395	6.104	8.85	6.409	10.681
251.703	659.2	301.5	275.8	359.6	1215.1	24.9	54.3	731.5		145.7	188.891	217	61.6	128.9	385.75	19.5	68.125	176.875	349.6	479.7	198.8	129.9	199.1	214.3	272.2	302.8	11.2	25	90.3							cell 14	4.64667					14.8006	10.376	5.798	14.038	36.316	23.804	6.714	26.245
414.297	447.2	554.2	700.7	148.5	184.8	919.3	52.7	285.3		63.3003	347.406	1002.4	460.5	96.3	82.9375	198.7	52.875	301.438	1346.6	1606.7	162.8	412	23.2	1480.3	282	158.8	54.3	51	134.7							cell 15	1.94					9.50849	19.836	4.578	9.155	9.46	13.733	9.766	17.395
2288.91	115.3	321.6	193.2	71.9	17.1	72.4	301.2	778.3		371.5	263.703	144	629.7	31.4	347.188	601.6	412.812	430.875	1234.7	193.2	369.7	28.6	141.9	1123.5	997.1	58.8	70.5	148	944							cell 16	2.29					23.9582	9.155	5.798	14.343	10.986	10.071	6.714	11.597
29.3906	488.3	66	1150.4	75.2	14.1	21.1	215.3	29.4		335.7	262.094	178.9	82.1	33.5	167	214.6	469.906	263.125	405.3	108	18.1	17.7	158.9	55.5	81.9	187.8	25.3	13.2	277.8							cell 17	5.04					13.0188	50.964	4.578	8.85	10.071	10.986	6.714	18.311
401.406	208.6	335.1	42.2	36.8	235.8	233.3	789.7	271.3		225.3	981.797	343.1	151.6	107.1	483.375	28.8	15.0938	58.75	532.5	271.5	105.3	24.4	121.6	229.3	205	253.1	102.3	140.8	131.2							cell 18	9.16333					10.7238	7.935	17.09	7.324	8.24	14.648	7.324	13.123
214.297	126.8	879.2	347.9	134.6	159.2	719.9	26.9	369.7		687.8	191	363.3	541.2	57.8	72.5	522.1	155.406	701.312	4872.4	99.9	38.1	19.2	344.9	761.1	176	35.8	39.5	54.3	46.2							cell 19	13.1433					53.0873	18.921	6.409	19.836	20.752	37.537	7.324	15.259
54.9062	37	134.1	1226.4	113.8	746.7	1201.5	91.6	1124.6		334.6	1175.81	425.6	681.2	79.9	112	632.2	139.688	857.688	923.2	10.6	97.6	128.9	634.4	378.5	438.1	242	64.9	82.9	95.8							cell 20	4.65					9.85268	10.986	8.85	6.714	24.414	21.362	6.714	11.597
129.688	315.2	21.1	161	202	372.7	311.3	39	24		1031.9	257.688	30.4	149.6	87.4	84.125	1045.8	125.594	198	222.8	110.8	16.7	294.7	373.6	436.5	154	87.4	57.1	26.9	46.7													39.2422	8.545	4.578	7.629	17.09	11.902	6.409	10.681
17.2031	240	401.6	107.9	789.4	83.8	976.4	71.7	436.9		1165.3	321.203	127.5	657.5	267.9	123.625	551.6	54.625	982.75	151.4	105.7	280.5	607.2	829.2	520.3	18	268.4	80.6	190.4	40.9													8.48317	12.512	4.272	16.785	28.992	33.875	10.986	22.583
262.109	208	237.3	714.1	330.2	1288	735.7	299.7	1160.2		438.3	190.109	311.5	59.6	111.3	52.0625	221.3	98.6875	103.688	1841.5	954.9	132.4	67	1236.3	1100.6	798.9	195.2	239.4	75.2	40.7													18.2798	10.986	16.479	13.428	37.231	8.545	7.019	12.512
474.297	199.9	72.8	93.8	219	347.2	127.5	103.8	1110.2		188.4	88.5938	205.5	53.8	12.2	88.8125	84	113.094	331.812	1739.2	521.3	76.1	40.8	272.4	2219.7	487.8	306.9	109	30.6	166.5													37.4399	10.376	6.104	10.071	9.46	19.836	6.409	26.55
239.391	302.5	300	1074.9	317.5	734.6	657.8	245.8	1064.8		248.2	42.7031	351.9	458.2	110.3	153.875	165.4	417.719	223.188	509.2	388.1	26.1	142	183.8	746	602.4	274.4	239.5	130.6	277.4													19.9584	8.85	5.798	17.7	22.583	9.46	8.85	14.038
161	117.2	164.9	1411.6	57.3	9.1	324.5	224.8	201.5		519.5	854.391	248.3	71.6	38.5	159.75	641	126.281	109.5	503.7	627	430.7	403	366.3	1578.7	136.1	150.5	4.2	68.1	66													14.8463	10.681	4.578	16.174	9.46	9.155	7.324	25.94
624.812	211.5	250.4	512.5	198.5	609.9	282.1	447.9	50.4		118.8	74.4062	52.5	16.3	40.3	238	39.4	36.406	1459.81	480.8	433.7	76	100.2	54.2	1122.9	314.6	593.8	66.8	9.1	80													7.85058	6.714	6.714	9.155	18.005	34.485	6.409	18.311
383.5	43.5	159	243.8	165.2	680.7	68	332.3	71.1		754	264.5	80	147.6	352.8	88.25	565.7	164.188	732	488.4	631	16.2	119.2	599	199.7	17.4	40.5	23.5	34	366.4													24.6771	14.954	4.272	5.798	5.798	27.466	6.104	18.921
211.797	299.3	224.7	141.5	113.1	169.3	19.3	169.8	2590.8		797.5	643.5	274.5	100.8	213.1	199.938	124.6	96.3125	130.5	657.2	1050.3	263.2	30.5	201.7	1950.3	49.7	245	235.2	35.9	428.2													10.0408	7.629	4.272	8.24	12.207	10.071	7.019	39.063
58.2969	564.6	1192.8	202.9	130.1	263	691	176	3457.7		175.9	0.59375	1040.4	310.1	68.1	334.875	362.8	48.5	264.562	525.6	643.3	93.8	130.6	785.9	2036	469.8	452.7	37.3	87.2	154.3													15.8468	14.038	5.188	17.7	14.648	13.733	9.46	13.733
724.094	184.7	321.8	1715.3	196.4	775.8	142.3	80.3	263.7		167.699	134.703	262.8	526.9	26.9	50.125	32.9	284.906	328.5	2269.2	452.3	20.6	109.3	426.5	357.8	39.9	246.1	70.4	48.5	33.9													9.12157	52.49	5.188	22.583	7.019	9.766	6.409	18.005
166.312	148.2	627.4	122.2	22.1	32.8	270.4	641.7	1294.3		127.4	61.2031	57.1	106.6	351.6	88	27.1	282.094	311.625	207.3	1067.6	392.4	147	228.7	126.3	377.9	115.4	97.3	125.5	68.7													9.06129	9.155	7.324	6.714	5.798	16.479	8.24	20.447
360.688	1195.1	902.9	512.9	183	24.4	443.9	343.3	69		53.2998	802.906	793.4	319	231.5	210.062	851.7	67.6875	733.875	2605.3	516.4	120.2	39.3	290.6	310.3	276.4	243.1	56.4	188.9	251.5													73.2716	11.292	10.681	10.376	5.798	10.071	10.376	35.4
1323	503.6	343.9	408.3	133.8	104.2	724.7	886.1	875.2		278	177.188	126.6	416.9	17.4	80.9375	1618.6	215.407	168.938	1484.5	573.8	262.3	21.8	15.3	1147.9	513.5	1231.1	41	22.7	106.8													44.345	7.629	5.188	15.564	34.18	10.376	6.104	51.27
2306.5	767.3	3676.4	1170.9	356.6	698	40.4	135.8	1640.1		39.7002	189.906	251.4	260.5	113.8	128.312	225.5	303.406	2597.88	1068	436.2	960.9	194.5	100.3	1514.8	34.7	307.4	93.7	166.9	160.9													66.4852	19.531	4.883	8.24	6.714	9.46	7.629	20.142
343.109	1302.9	779.4	574.3	299.4	310.9	17.8	150.2	2199.3		319.1	148.594	233.5	526.2	293.9	59.1875	1372.1	172.406	254.5	232.4	2303.3	148.1	68.3	724.8	70.5	67.6	493.4	13.2	37.1	19.4													38.04	29.297	5.798	7.324	7.629	27.466	7.935	21.667
104	210.6	853.9	1719.6	18	84.1	1034.6	32.1	1518.7		89.6006	975	259.2	91	28.3	305.688	658.4	0.28125	255.625	1163.3	949.3	408.9	843	310.3	315.9	523.5	51.6	106.2	34.5	262.6													13.2343	12.512	7.019	19.226	16.479	15.869	7.324	16.479
1414.8	880.2	334.9	823.8	191.1	1039.2	1268.4	318.8	291.8		1.09961	47.1094	533.3	225.1	420.4	260	361.4	127.625	867	349.8	214.1	109.1	99.5	550.7	3269.8	369.9	208.8	266.9	93.3	57.3													65.3566	8.24	5.493	18.921	25.33	10.071	9.46	29.602
1223.3	1245.4	905.3	40.5	104.4	307.3	269.5	123.8	205.2		1125.7	269.297	987.8	380.9	23.6	31.1875	132.4	204.5	83	9465.6	224.7	116.3	310.6	171.3	1906.5	576.6	25.5	207.2	59.3	336.8													14.1886	6.714	8.85	7.935	25.635	18.311	7.324	11.292
430.609	63.5	177.5	59.8	569.1	143.2	176.1	18	94.4		606	198.406	876.6	221.6	342.4	62.625	219.4	217.782	154.5	22.9	77.8	277.1	202.2	507.6	447.5	296.4	12.8	159.8	145.9	731.9													109.939	13.428	6.409	7.629	6.104	10.986	7.629	25.024
39.0938	365.5	1011.2	164.8	27.2	19.7	586.7	252.5	309.6		423	106.891	423.3	131.1	38.5	373.062	417.6	186.906	339.5	74.8	33	85.5	275.3	570.4	443.7	72	45	147.5	56.7	74.3													30.3362	15.564	7.935	6.104	5.798	10.681	6.409	23.804
337.594	163.8	385.4	623.6	381.6	21.1	16.1	422.7	271.2		0.300781	45.5	75.8	241	25.5	180	82.4	286.312	40.5625	106.2	154.3	504.8	228.7	268.2	4027.7	269.9	258.4	78.5	308.7	45.3													10.2966	6.714	6.104	13.733	12.207	12.512	6.714	25.33
1427.7	70.9	29	717.2	32.7	153.2	321.3	327.9	961.6		34.5	685	154.8	142.7	20.9	49.3125	243.1	0.59375	36.8125	784.8	649.5	605.7	188.2	753.2	1133.1	323.9	111.4	242.7	185.9	430.4													11.8515	44.556	4.883	17.7	6.104	11.597	6.409	44.556
399.406	415	332.4	566.9	131.6	256.7	644.9	108.3	817.6		144.898	287	274.5	203.7	361.1	106	826.7	253.594	62.125	1636.5	366.8	23.8	217.1	169.3	485.1	236.5	142.8	209.3	67.8	140.9													75.2281	12.512	5.798	21.057	7.019	8.85	10.681	15.869
93.7031	229.8	148.4	137.9	68.2	562.2	48.5	39.4	574.7		835	31	187.4	31.6	181.9	659.188	262.3	116.812	285.875	111.1	92.9	224	235.2	384.2	66.3	300.7	52.6	103.2	87.1	43.1													12.5062	7.324	9.46	6.714	12.512	8.24	8.85	11.597
915.094	333.5	445.7	835.4	305.5	217.6	152.4	29.5	1142.4		47.9004	78	41.5	110.4	88.2	39.4375	237.4	91.2817	120.688	275.3	1410.3	126.5	104.4	46.6	284.8	237.9	113.3	16.3	149	210													7.91379	16.479	4.883	8.85	21.667	7.935	8.24	27.771
532.094	45.6	384.5	194.4	216.4	16.3	964.3	49	1297.7		132	41.2969	73.2	111	32.9	29.6875	562.7	49.2183	325.625	1640.7	303.3	43.6	355.6	333.7	1034.9	300.7	83.8	124.5	33.6	51.8													11.1918	6.714	7.019	20.752	18.311	10.071	6.409	37.231
53	151.3	994.3	255.3	489.2	117.1	773.3	484.9	66.6		59.2012	836.703	147.6	369.9	419.6	94.3125	113.9	234	162.062	664.5	526.4	11.6	110.2	64.3	771.7	61.7	706.4	20.9	47.8	539.9													28.4571	13.733	9.46	9.766	27.466	32.654	6.104	21.973
1163.41	76.7	37.6	777	168	521.1	2375.6	176.4	158.9		108.799	147.5	66.5	263.8	160.7	134.188	176.4	62.1875	35.9375	416.5	58	654.3	214.8	292.8	63.1	459.2	382.8	20.8	57.8	247.5													31.2691	8.545	5.188	6.409	17.09	54.016	6.409	26.55
219.703	578.3	150.9	1149.7	76.8	135.2	1920	66.2	1010.3		133.801	139.297	154	695.1	32.3	218.625	54.9	189.812	141.312	38.5	175	146.3	100.4	356.9	365.2	217.5	12.6	22.2	7.3	84.3													52.1984	8.545	10.071	13.428	5.798	12.817	8.24	28.992
316.891	434.8	348.8	1949.2	331.1	132.1	258.7	375.3	705.2		134.4	450.703	25	270.5	47.2	116.25	230.3	101	820.875	1243.3	129.6	115.6	156.8	151.1	107.7	95.2	161.1	212	54.4	597.4													18.2324	12.207	8.85	19.531	8.24	8.85	8.85	15.869
231.406	234	47	376.7	31.2	22.4	207.6	341.3	318.3		491.199	616.906	262.7	208.9	49	421.438	21.1	263.688	459.188	475.7	25.7	40.8	94	153.2	833.5	27	166.9	329.5	135.8	68.2													15.3468	7.324	9.766	17.09	5.798	81.177	7.324	29.602
1235.3	1911	338.4	2965.8	87.5	34.6	47.6	431.3	1134.4		435.1	135.891	76.8	34.4	555.2	663	1603.3	155.188	267.188	1045.9	406.5	65.4	342.1	54.6	1348.5	133.7	126.6	18.4	306.8	33.5													8.02265	9.155	18.921	11.597	21.973	10.986	9.46	28.076
214.109	185.7	58.6	541.3	254.6	518.3	805.2	183.1	1680.3		82.8008	233.406	54.8	20.8	45.3	108.312	772.8	51.2188	147	1378	998.3	241.6	94.5	96.3	1679.8	129.3	633	14.7	67.1	56.9													15.8337	9.766	9.46	6.409	20.142	18.616	6.714	22.278
942.891	543.6	511.1	61.7	99.7	114	838.7	389.3	891		196	189.203	158.6	155.8	10.4	386	99.9	50.5	99.125	335.2	361.8	27	225.1	306.4	2493.5	99.3	220.9	36.4	30.9	171.8													14.9994	6.104	23.804	12.512	10.986	19.226	6.104	17.09
1248	337.6	57.6	771.8	100.8	237.3	232.8	408.9	441.8		33.5	228.703	253.6	122.2	434.5	40.5625	350	117	155.312	30	372.3	216.4	278.9	7.1	214.6	255.8	748.7	151.2	8.5	136.4													60.0139	12.207	8.24	15.564	5.798	14.038	6.409	14.343
730	74	624.3	643.9	128.1	697.3	2516.3	66	240.2		36.0996	117.797	47.4	262.3	188.9	128.938	470.6	81.4062	313.875	200.2	777.4	36.5	10.8	37.8	2219.4	187.6	205.7	130.1	66.6	1157.4													12.5199	17.09	4.883	14.648	7.019	11.292	6.714	16.479
213.906	90.1	1787.7	1252.8	229.9	14.6	874.9	306.2	930.4		310	235.797	55.5	100.1	49.1	95.5	30.9	332.594	258	22.6	119.2	235.6	419.6	18.7	914.5	343.2	8	64	319.6	1.2													24.1172	7.935	7.324	16.785	34.79	7.935	7.324	33.264
65.8906	909.9	285.4	602.1	265.3	204.1	78	52.4	1481.1		74.6992	284.094	1701.2	264.9	11	48.75	961.1	100.094	202.312	903.4	71.2	15.6	151.2	254	172.7	447.1	19.6	23.8	98.8	104.5													8.40899	8.85	5.493	7.324	14.648	95.215	7.629	16.785
148.203	47.1	266.9	183.7	196.4	155.5	1443.5	364	1042.3		220.801	292.312	136.6	133.8	136.4	138.938	241.4	83.5938	279.375	1363.5	48.1	88.2	138.6	573.3	1503.3	385.4	188.9	153.4	12.6	92.8													13.8014	7.935	9.46	15.259	10.376	10.376	6.409	36.621
91.7969	350	210.4	122.2	208.7	82.2	526.2	251.5	1.5		278.699	515.797	265.9	103	51.9	35.6875	299	0.40625	1191.44	117.1	39	188.3	222.8	580.5	3353.8	535.6	619.2	59.4	41.6	61.7													13.5146	8.24	6.409	14.648	10.681	7.935	6.104	22.888
264.5	68.7	548.2	381.6	86.7	1412.7	599.4	108.2	84.8		178.701	635.891	590.2	141.5	281.1	417.688	229.2	208.812	867.375	739.6	400.2	103.9	46.7	703.1	953.3	159.6	260.9	270.6	54.9	60													10.9679	6.714	8.545	6.714	24.414	13.123	6.104	38.452
300.703	263.7	996.8	295.9	137.3	104.6	325.7	207.9	53.5		52.1992	294.609	290.8	67.2	151.5	241	361.7	200.781	794.125	2052.3	110.3	327.3	20.2	630.6	455.9	80.2	50.1	244.7	41.9	259.9													13.2947	6.104	4.272	6.714	20.142	17.7	6.714	15.869
337.703	204.2	1524.2	571.4	491.5	1715.4	249.5	197.6	785.5		115.9	318.391	134.4	120.8	15.6	399.5	42.2	273.219	298.062	238.7	206.8	56.1	83.8	371.8	75.9	153.7	69.6	115.4	36.3	461.3													10.662	10.986	5.493	7.324	17.09	10.376	8.545	21.362
70.7031	114.7	667.5	1966	240	566.9	384.1	219.6	47		105.4	48.5	427.3	533.3	17.1	153.625	302.9	251.5	129.312	2404.4	136.6	304.6	669.4	137.8	1923.2	651.6	197.3	175.8	82.6	470.6													16.5478	16.174	7.019	6.104	19.531	21.973	6.714	15.564
1134	847.7	147.9	333.6	292	773.6	0.4	235.1	1537.4		192.799	374.109	249.4	72.2	261.6	613.062	668.2	143.281	992.188	985.4	19.1	462.1	455.5	269.1	230.3	379.6	736.8	312.5	33.1	196.6													42.9145	6.409	9.766	7.935	29.297	9.155	7.019	19.226
1538.2	467.2	358.2	111.4	90.3	149.5	155.9	66.5	170.8		116.301	330.891	214.1	235	49.5	46.4375	131	38.2188	15.125	848.8	641.6	92.2	14.9	127.4	54	193.1	75.8	19.4	55.1	178.7													10.7742	6.409	29.602	6.714	10.681	14.343	7.019	11.292
798	147.7	207.1	19.8	61.2	632.5	701.2	164.8	52.2		98.0996	116.5	279.3	379.6	190.8	114.812	706.6	142.188	121.625	34.8	68.3	740.1	45.7	918.2	260.4	251.9	470.3	63.8	46.9	63.3													19.8093	11.292	4.578	6.714	9.766	15.564	6.104	12.207
152.891	1388.8	1328.9	264.2	274.4	229.1	574.4	173.5	542		338.5	1243.7	207.3	413.9	34.4	184.25	361.6	129.688	61	948.3	265.2	50.7	49.4	393.8	458.7	457.4	64.6	116	25.8	19.3													9.32597	8.85	4.578	6.409	20.752	16.174	6.714	13.733
584.5	385.3	833.6	374.3	32.1	1352.3	476.7	119.4	818.9		237.301	519.5	64	144.5	256	557.438	139.1	34.3125	321.062	1566.4	185.8	374.9	201.9	20.1	200.4	243.1	24.7	295.8	18.7	168.2													11.7129	10.986	6.409	20.142	13.123	10.986	6.409	26.245
143.703	73.4	459.5	146	460.2	372.4	1134	305.4	244.9		112.199	348.5	498.2	421.1	124.6	39.8125	9.8	0.90625	941.625	788.6	430.5	60.6	79	400.2	124.3	137	84.7	59.7	15.8	564.3													16.5682	8.24	10.071	7.629	7.324	10.986	9.46	41.809
1942.59	567.6	207.3	50.7	86.9	17.5	652.4	59.3	1717.9		100	405.609	398.3	201.4	28	184.688	493.9	176.094	230.5	1209.3	759.5	301.7	164.2	309.5	1356.6	402.7	401	90.3	14.1	452.8													51.5828	10.681	7.019	5.493	6.714	34.485	7.019	21.057
90.1094	306.9	789.5	1075.7	73.2	115.2	188.5	455.8	998.3		222.201	35.8906	51.3	87.2	261.2	43.3125	93.5	106.688	312.562	912.6	85.4	141.4	92.4	85.9	1836.6	71.9	79	37.2	36.5	144.1													27.8974	10.071	6.409	8.545	5.798	33.569	8.24	19.226
75.0938	1641.2	61.8	172.2	172.6	431.6	367.1	43.3	628.5		97.2988	353	940.5	607.3	55	181.875	527.5	147.125	133.25	25.7	190.7	417.4	193.6	908	45.3	82.7	371.1	118.7	50.6	91.3													10.3083	7.935	7.935	17.7	11.597	7.324	7.629	18.616
772.703	319.8	828.7	359.7	202.3	43	508.6	163	212.8		212.6	825.609	88.8	142.6	97	72.875	149	84	80.875	752.6	929.4	422.3	521.2	72.2	1623.4	515.6	15.6	85	97.6	520.6													18.3085	11.597	8.85	8.545	40.894	7.935	7.324	36.011
1435.8	1196.2	368.9	263.6	34.8	66.5	30.6	300.3	147.5		124.801	103.688	198.8	77.9	48.8	21.8125	664.4	317.094	143.312	2489.3	725	74.2	284.2	742.7	87.4	452.2	883.2	16.4	23.4	461.3													12.1156	12.512	7.935	7.935	21.057	13.428	6.104	25.024
372.297	23.8	452	48.9	187.9	216.4	600.1	436.7	554.4		316	239.812	215.8	372.6	250.9	60.4375	441.6	243.188	55.6875	10.6	1799.8	286	38.9	155.8	201.5	43.4	433.8	180	22.5	323.8													12.3399	10.681	4.883	9.155	43.945	10.376	6.104	31.128
1345.11	740.2	86.9	1061.2	141.4	75.3	796.2	63.2	54.5		406.301	49.5	958.9	312.8	14.6	155	485.4	34.8125	604.875	2751.3	8.2	63.8	1106.1	121.2	714.8	136.4	9.1	71.9	89.7	305.8													20.7483	6.714	9.766	7.629	6.104	11.292	6.409	17.7
1733.89	146.7	1895.9	66.4	236.7	166.3	269.8	172.6	150.7		52.0996	1598.69	135.4	443.6	75.2	113.875	18.6	86.9062	78.9375	109.5	755.1	322	109.3	914.1	998.8	823.6	187.5	22.4	89.7	31.7													11.1544	7.019	5.188	9.46	11.902	12.512	9.155	21.362
233	1087.5	584.4	225.6	325	178	226.3	29.3	120.7		365	155.609	1124.5	323.1	262.4	190.812	398.7	103.5	408.812	133.4	918.2	16.6	338.9	335.1	5106.9	619.9	636.2	11.6	29.1	147													13.5807	8.85	5.188	15.259	5.493	9.766	7.324	14.038
324.609	163.6	681.9	515.8	75.4	102.6	79.4	38.8	35		351.4	377.703	121	125	38	312.812	169.8	273.188	118.688	630.5	211.2	663.9	88.8	2972.3	112.8	59	101.2	58.2	16.1	60.2													40.263	7.019	7.935	15.259	12.512	72.632	8.545	15.869
78.7031	310.2	257	569.3	36.6	508.2	702.1	78.9	108.7		185.898	596.5	1212.8	78.7	341.4	286.25	1136.7	48.9062	195.375	2041	1305.8	193.5	51.5	765.3	184.3	299.8	246.4	26.3	43.1	201.5													42.5729	9.155	4.578	12.817	12.207	10.071	6.714	13.733
373.188	408.6	2307.4	280.8	266.5	169.4	906.1	39.7	358.3		190.9	1216.39	655.1	407.3	123	72.125	307.3	0.28125	366.125	1134.4	1129.7	38.1	9.6	1889.1	1474.6	913.2	291.4	124.4	28.1	53.4													20.0488	6.714	7.019	14.648	15.564	26.245	6.409	10.681
69.8125	530	678	199.7	348.6	373.4	391.1	65.6	635.8		830.1	1058	403.6	107	425.1	20.125	178.4	0.40625	12	2010.2	686.3	26.4	731.6	213.4	390.5	229.7	74.2	160.2	17.7	39.9													12.7761	15.869	4.578	13.123	42.419	8.24	6.104	27.771
2104.69	72.9	117	1015.3	284.7	1434.1	337.6	11.4	585.7		219.4	155.109	395.7	469.7	165.8	29	282.9	307.594	315.562	907.2	49.5	557.9	292.9	591.1	535.8	378	179.4	95.2	16.6	690.2													7.75969	10.071	10.071	9.766	31.738	9.46	9.46	26.855
0.3125	425.2	294.7	24	14.1	435.8	290.1	30.4	2066.7		51.4004	616	199.6	247.9	179.7	44.0625	217.2	95.5	105.5	2060	118.8	537.6	12.1	99.9	286.7	431.9	106.1	65	143.9	258.8													7.75609	8.24	5.798	7.935	14.343	13.733	7.019	21.057
68.6875	630.5	20	250.3	798.2	474	850.9	503.7	878.9		256	944.188	46.8	45	293	38.125	343.1	829	135.625	988.9	791.9	75.7	212	202.3	205.5	416.7	33.1	107.7	36.1	0.5													16.104	7.324	4.272	12.207	18.005	13.733	8.24	11.597
999.703	429.1	190	11.4	117.2	96.8	449.9	25.5	89.4		184.1	531.906	299.9	225.9	99	137.188	204.3	59.3125	218.375	178.7	42.9	22.3	42.4	157.6	493.7	99.7	140.3	26.2	27.9	171.8													28.1837	7.935	10.376	5.493	8.85	15.564	7.935	11.292
51.7031	68.3	855.6	1000.9	194.4	501.2	530.1	70	641.9		183.4	524.5	155.3	63.8	24.2	381.625	17.4	338.312	875.75	1659	774.4	180.3	106.5	104.7	763.3	443.3	75	20.5	58.5	312.2													10.3001	45.166	5.798	13.428	11.597	12.512	7.629	14.038
3776	489	1171.6	143.2	130.9	244.3	59.7	110.4	1370.7		417.5	723.594	783.2	282.8	67.8	26.0625	1026.1	23.5938	111.188	916.5	812.5	122	215.7	158.1	185.5	309.8	147.4	18.9	47.9	179													16.103	17.09	14.648	7.019	7.324	11.292	7.935	10.681
1667.19	172.3	838.3	317	42.5	965.1	373.2	29.2	53.5		188.801	212.703	70.6	98.9	363.9	32.3125	1205.9	100.688	219.812	294.2	759.8	27.7	67.5	194.3	1200.9	490.7	43	27.4	88.3	565.2													32.802	7.629	4.272	8.85	27.771	12.817	6.714	14.954
166.312	1798	570.4	62.9	185.2	676.4	498.6	236.9	16.1		272	695.797	118.1	217.2	120	45.375	318.3	209.5	181.562	2.3	619.8	133.5	20.7	47.6	369.3	66.7	36.9	144.6	258.5	157.4													10.7554	9.766	6.409	16.174	37.537	8.24	9.155	34.18
1404.31	270.2	417.2	413	409.6	315.7	480.5	130.1	1852.3		146.6	494.812	1088.5	221.3	68.6	227.312	1053.4	91.5	231.688	498.1	235.9	74.5	263.9	100.1	442.5	883.8	130.6	30	154.7	332.2													35.1357	8.545	4.272	15.259	41.504	15.564	6.714	25.024
606.688	346.7	454.8	613.7	272.5	52.6	649.2	235.9	1306.9		315.799	712.688	70.6	67.3	49	41.6875	615.2	480.5	279.5	343.4	213.9	118.1	121.5	140.7	409.3	85.3	413.2	73.4	195.4	34.5													18.4245	11.292	4.578	7.019	12.512	7.629	7.324	11.597
940.094	112.8	739.9	121.2	35.1	128.3	1603.2	44.9	0.4		185.9	350.812	259.2	71.7	61.6	128.312	160.6	66.2188	60.75	600.3	82.1	143.8	171.6	622.7	1259.3	928	284	55.2	122.1	314.2													12.0761	8.85	5.188	6.714	16.479	13.428	6.714	15.259
844.906	17.3	344.9	235	83.2	217.9	628.2	595.3	1399.3		123.301	186.594	212.3	473.2	41.9	173.688	516.6	81.875	50.0625	515.7	805.3	20.4	43.2	364.3	17.5	72.3	318.5	62.6	59.8	350.1													13.2702	6.714	16.479	19.836	19.226	7.935	7.019	20.752
100.094	151.7	652.4	832.1	39.5	47.6	627.3	219.2	291.9		389.4	1443	727.6	269.1	30.2	707.438	40.7	40.125	922.625	501.1	598	89	243.5	1504.9	656.3	113.5	455.5	105	45.4	569													17.9744	7.019	5.188	7.935	9.155	12.207	7.935	16.479
350	348.7	154.6	25.1	83.5	140.9	378.8	0.8	678.6		328.799	711.203	203.5	358.7	26.7	249.5	1068.1	131.781	139.562	18.2	658	170.4	436.5	116.3	2187.6	13.1	486.9	87.5	9.6	13.4													13.6081	7.935	10.986	12.817	7.019	12.817	9.766	16.174
61	433.3	314	407.1	1771.4	67.6	29.8	725.7	2673.2		424.6	1076.5	113.4	373.7	139.7	27.1875	42.3	824.094	157.25	3356.2	209.8	447.5	38.8	18.9	118.1	21.7	44.6	57.6	142.7	752.5													53.0272	10.681	4.883	15.564	9.155	41.504	6.104	29.297
204.812	283.3	532.9	87.8	112.6	176.6	599.9	353.3	857.9		348.602	241.891	323.2	109.5	174.3	477.688	483.2	85.5	88.875	494.4	677.7	130.6	37	85.8	85.9	14.8	131.4	82.5	43	313.5													26.6459	8.85	4.578	6.104	7.019	15.869	6.409	44.861
771.875	282.5	2276.3	150.4	118.1	485.1	646.9	129.2	275.8		133	107.203	344.3	979.3	138.2	101.125	33.4	127.5	39.875	688.7	936.8	305.3	80.8	698.8	454.3	22	1069.8	179.4	136.9	16.7													44.5834	7.324	7.935	16.479	6.714	8.85	6.714	21.667
654.5	147.4	1906	238.7	153.6	329	624.6	561.4	1172.2		437.6	92.7031	491.7	373.4	59.6	55.875	113.8	146.219	111.625	215.3	308.7	129.9	32.3	59.6	454.4	28.2	167.2	18.5	23	358.4													23.1361	7.019	4.578	7.935	16.479	15.869	8.85	14.038
711.907	988.4	540.4	460.9	438.9	137.7	623.5	600.2	803.6		139.1	170.906	17.4	374.4	52.3	604	127.4	185.906	290.875	725.1	333.8	46.5	30.6	53	13	194.3	181.2	102	88.9	116.3													22.9678	9.766	11.902	8.85	36.316	9.46	6.104	41.199
2307.59	1148.2	392.6	130.5	278.8	931.6	204.8	235.5	353		144.4	51.0938	839.3	778.8	164.7	287.625	500.8	83.6875	321	213.8	512	202.4	146.6	397.9	494.8	102.5	264.6	125.5	142.1	163.2													22.9744	8.24	5.188	16.479	19.226	11.597	6.714	12.207
357.219	238.2	203.6	139.4	389.5	207.7	1012.9	148.3	478.8		295.799	344.797	369.2	523.7	105.7	155.688	147	79.5938	166.75	1044.4	351.7	60.9	906.6	236.8	873.7	57.9	30.9	47.5	227.3	200.3													106.881	10.071	14.038	6.714	6.409	8.545	8.24	19.836
367.188	313.2	24.6	1098.7	66.3	85.6	474.9	66.1	18.3		151.5	85.1094	87.1	102.2	337.2	550.188	1458.8	63	863.75	494.2	287.7	303.1	42	155	94.8	58.6	150.1	34.3	116.5	398													9.57285	8.24	7.935	14.648	12.207	20.447	6.409	24.109
0.718262	594.9	318.8	170.1	468.3	94.2	761.8	499.3	1883.7		187.701	853	608.7	124.6	238.7	777.312	1353.4	63.5	391.938	1415.5	23.2	14.8	367.8	14.8	380.3	62.8	225	55	63.5	140.5													9.62868	7.019	5.188	11.292	13.123	17.395	6.714	58.289
4637.78	884.5	1712.6	15.7	80.4	103.4	614.7	326.2	1020		62.2988	46	518.3	1408	16	233.875	1070.5	123.312	601.312	478.9	111.3	150.4	162.5	122.4	180.3	78.9	57.5	57.2	69.9	715.6													11.8159	14.954	5.798	6.714	21.973	13.733	7.019	28.992
70.7188	1066.2	588.3	601.3	200	395.3	365	176.2	56.6		275.701	1731.59	516.8	386.1	55.6	68.125	195.2	689.281	700	369	29.3	260.3	20.6	96.1	755.3	409	155.4	107.6	82.8	148.1													17.2072	7.629	4.883	7.324	13.428	14.343	6.104	46.387
63.875	115.5	797.1	144.2	377.5	24.5	1022.3	195.3	44.1		410.4	245	38.3	562.3	43.2	40.3125	283.7	99	119.25	261	351.5	151.3	41.8	616.6	1360.9	593	112.7	72.1	301.3	699.4													9.92453	8.85	4.883	5.798	11.292	14.648	7.629	12.817
200	348.9	183	532	896.2	12.8	392.5	315.2	166.8		276.6	47.4062	361.7	676.8	121.3	107.062	199.2	12.8125	80.3125	1189.3	2080.2	111.3	76.6	14.2	470.4	90	794.1	261.6	13.4	59													9.01329	8.24	29.602	13.428	24.109	14.648	6.409	22.888
631.625	548.3	614	30.5	290.8	156.9	42.6	437.3	1346.7		78.2988	482.594	20	503.7	116.8	361.25	122.1	281.812	494.438	951.6	78.3	713.5	262.5	154	92.2	391.5	535.6	12.8	87	84.5													7.48386	11.597	13.733	7.935	6.409	13.123	11.292	17.395
307.781	512.1	1501.1	439.3	650.3	683.7	185.7	24.8	749.3		80.1016	231.406	12.5	51.2	151.7	249.875	192.5	53.375	442.75	608	758.3	54.9	30.2	350.6	1408.3	207.4	400.3	111.3	221.9	408.2													17.3543	10.681	7.019	7.935	6.104	9.766	7.324	21.973
351.094	80.8	979.9	1209.3	253.1	2429.8	100	53.8	110		47.3984	65.8906	657.3	609.4	198	159.5	372.4	188.812	171.438	77.8	413.7	463.5	24.6	292.1	659.4	227.2	83.9	42.9	124.6	17.5													15.9694	8.545	5.493	14.648	26.55	19.226	6.104	34.18
209.719	668.3	1661.8	937	228.2	972.9	455.7	50.4	618.6		589.801	150.406	373	107.5	63.9	33	170.6	315.594	645.375	502.2	1277.5	62.9	599.5	980.4	1881.6	32.1	201	113	38.7	288													36.6574	6.104	7.629	16.785	5.493	13.428	6.104	10.681
60.9062	113.8	380.2	412.6	72.3	685.4	724.9	30.5	299.3		454.199	132.094	220.5	1115.1	28.9	105.125	266	257	91.8125	1735.4	273.3	661.1	601.9	130.1	27.6	41.1	354.2	97.9	49.4	124													10.4375	7.019	5.493	7.324	18.311	16.174	8.24	12.817
228.5	868.2	492.1	519.6	43.7	161.5	611.5	21.6	940.8		129.102	414.797	329.2	389.1	132	352.188	435.4	43	178.875	2317.1	47	403.5	98.7	360.6	523.5	279.7	338.2	121.6	56.3	121.4													20.1565	7.019	4.272	5.798	12.512	8.545	6.714	10.681
472	646.3	40.9	1490.6	111.1	736.2	58.2	64	93.9		170.699	437	462.4	263.2	211.2	313.188	665.4	32.5938	113.438	901.5	59	199.3	338.2	195.5	971.6	491.4	122.4	160.7	323.7	527.6													20.0186	9.766	5.798	15.564	15.259	7.324	7.629	10.986
110.375	20.4	21.1	37.6	565.9	873.7	584.5	130	55.4		0.300781	454.609	539.6	110.7	160.6	132.312	474.5	45.5	147.812	44	374.6	27.4	76.2	1200.4	669.4	336.8	46.9	47.8	17.8	998.4													8.35076	8.85	6.714	7.019	25.635	15.259	7.324	17.7
585.906	83.8	1549.4	1330.7	100.1	116.1	584.1	97.6	467.5		657.398	331.203	337.9	347.2	380.3	104.562	28.7	257.312	36.0625	826.7	634.3	400.2	335.8	800.1	1654.2	161.1	112.4	40.1	143.6	141.2													53.8273	7.019	10.071	8.85	10.376	19.226	8.24	37.842
327.906	147.8	476.1	409.8	108	445	57.9	78.8	150.1		529.902	383.797	217.2	102.7	61.3	463.125	298.9	69.1875	167.625	1722.1	1894.7	14.7	282.2	563.8	154.9	463.1	287.1	59.2	42.6	253.2													24.645	10.986	4.578	11.597	7.629	9.46	6.104	21.973
294.688	168.8	502.8	2106.7	64.5	91.9	115.4	37.2	516.9		396.5	513	218.7	116.6	26.8	273.688	92.2	218.219	85	440.8	164.6	107.9	115.2	73.3	1595.8	81.2	547.1	14.9	175.1	323.5													9.87137	24.414	6.714	21.057	17.395	10.681	7.629	10.986
1499.5	12.2	1135.3	613.6	130	1743.7	1059.2	55.1	298.2		140.297	713.203	112.1	25.5	67.9	209.125	141.8	296.5	35.8125	207.8	1254.8	150.2	753.2	356.4	646.9	179.1	261.3	135.6	51.1	271.2													37.4605	45.776	5.188	6.104	11.292	35.706	7.019	19.836
151.312	232.2	629.2	260.1	179.5	649.9	66.8	217.8	787.4		310.102	159.594	484.2	93.2	27.6	372.5	341.6	39.6875	322.688	749.2	96.4	157.1	619.2	143.4	1785.5	254.1	151.8	301.8	155.6	296.8													21.7343	11.292	7.324	11.597	5.798	28.076	7.629	28.992
66.5	107.8	216.3	615.8	62.6	1315.1	135.9	14.2	1496.5		209.898	136.703	174.6	185.3	328.1	614.688	19.6	45.2188	88.5	1357.3	92.5	29.7	91.8	64.9	543.8	38.1	55.1	34.2	51.9	334.8													15.5345	8.545	4.272	9.155	8.545	7.935	7.629	21.973
331.688	433.1	364.8	225.8	205.9	147.5	308.3	22.5	478.7		456.102	500.391	129.2	369.1	33.2	183.812	863.5	75.0938	90.5	916.7	308	85.3	147.6	44.9	212.4	199.2	167.7	64.3	24.9	381.2													13.5272	7.324	5.798	7.629	16.174	18.311	7.629	12.207
58.125	113.9	20.8	1248.3	378.1	30.9	393.3	31.6	36.5		29.3008	282.203	336.2	1178.7	137.4	256.375	472.5	15.4062	191.875	1444.1	257.1	137.1	69.2	848.9	46.7	153.5	389.2	73.2	79.8	60.6													12.506	11.292	5.188	10.071	15.869	17.09	6.104	17.395
463.688	500.4	850.2	509.5	336.5	126.4	315.3	206.9	1037.4		255.098	90.7969	45.2	591	100.5	420.625	57.5	66.7812	301	13.6	57.2	44.3	66.4	615.2	219	473.8	126.6	110.9	17.2	368.4													9.84354	14.648	6.409	9.155	27.161	9.46	7.935	12.817
349.188	894.3	210.8	527.2	78.1	119.1	737.8	126.3	482.2		163	61.5	201	205.4	110.3	61.8125	264.5	436	141.312	273.8	369	115.6	57	160.7	663.4	76.8	59.7	219.7	115.7	163.5													16.6475	7.324	22.278	17.09	13.123	15.869	8.545	32.654
1455.91	26.3	550.3	374.8	1253.8	254.5	238.3	61.9	220.4		211.5	192.703	74.2	87.5	108.3	527.875	21.5	94.8125	163.188	673	434.2	535.3	909	818	495.9	54.6	55.4	201.8	11.6	39.2													109.93	6.714	4.883	6.409	21.667	19.226	8.85	25.024
247.094	384.9	535.5	756.7	127.5	1279.6	711.5	718.8	536.5		105.301	61	177.4	78.4	156.4	427.375	298.6	170.688	167.625	1021.9	155.1	20.4	346.4	382.4	136.7	770.3	29.9	212.6	62.6	36.4													81.6867	6.714	25.635	8.545	5.798	13.428	7.935	18.616
680.906	477.6	791.1	144.8	319.1	370	451	19.5	1431.5		121.699	496.797	347.4	89	93.3	633.625	100.8	123.219	138.375	1660.2	857.7	271.2	120.6	360.9	153.4	116.7	212.1	97.9	55.6	101.7													9.9032	10.986	7.935	7.629	34.79	10.681	7.935	11.597
843.219	445.4	341.8	198.8	464	920.7	714.8	119.1	135		131	1644.31	284.7	62.3	36.2	204.875	1216.6	0.59375	443.688	128.6	770.3	190.3	30.9	883.3	151.7	317.1	62.3	187.7	81.3	191.6													27.0086	6.409	29.297	9.766	34.18	11.902	7.324	19.226
485.5	356.2	349.5	22.6	189.5	267.8	1210.8	75.3	678.2		142.703	88.5	161.3	1297.2	351.8	62	575.8	0.59375	78.4375	266.9	347	0.4	82.5	158.6	171.2	168.7	160.8	127.5	14.9	56.9													21.9991	40.894	6.714	13.733	41.504	17.395	7.629	25.33
0.59375	85.2	865.7	859.1	224.7	38	88	16.5	313.2		526.297	581.891	111	797.1	42.3	66.625	334.2	178.5	490.562	515.3	526.8	113.5	22	69.7	636.1	78.3	173.4	36	110.8	164													22.0666	6.714	6.104	7.629	13.733	12.817	7.324	38.452
234	224.3	1104.7	9.7	30.7	377.1	0.4	94.4	139.3		245.801	942.609	31.2	493.3	101.5	43.8125	37.7	72.3125	81.5	564.8	765.9	13.8	95.9	167.2	1472	87.9	118.7	153.6	27.2	88.6													15.1292	11.292	4.578	8.24	11.902	30.823	7.629	54.321
657.188	955.3	27.3	477.6	340.3	939.7	40.3	768	197.3		91.1992	75.5938	274.8	285	299.9	131.188	281.6	78.5	345.125	462.3	973.2	85.6	7	126.7	81.9	265.2	99	75.4	236.7	363.5													38.2328	8.545	8.545	7.019	21.667	12.512	11.292	26.855
243.406	160.4	100.4	145.2	298	762.5	600	67.4	232.7		268.801	1299.2	342.7	26.8	182.2	145.875	508.5	168	154.375	159.9	347.9	308.6	490	788.7	73.9	112.8	211.4	51.2	53	619.6													9.24245	6.714	11.597	14.038	18.311	10.986	7.019	22.583
926.594	25.3	1227.7	195.4	41.4	214.2	193.9	32	23.6		248.402	232.5	53.8	61.8	146.1	360.312	185.2	240.781	165.5	1141	1064.2	127.3	70.7	377.3	664.8	105.4	1.2	35	221.8	78													11.0384	9.155	4.272	8.545	8.545	11.597	6.104	29.297
254.094	620.5	614	512.4	103.9	255	514.5	71.2	405.2		31.7969	357.891	39.3	106.6	36.7	160.125	261.8	63.9062	53.3125	992.1	554.8	312.9	168.8	501	147.3	117	104.1	12.9	11.7	398.4													11.5261	7.935	4.272	5.493	17.7	7.935	7.019	15.259
115.125	200.4	699.6	113.7	339.9	269.1	287.2	358	980.5		33.8008	53.3125	37.2	446.2	29.9	61.1875	123.9	107.5	45.4375	73.6	611.7	288.9	41.8	186.4	158.4	268.1	136.5	83.9	15.2	469.5													34.9011	6.409	4.272	13.428	19.531	22.278	7.935	23.193
213.281	382.1	841.6	252.2	734.4	45.4	92.4	253.3	438.6		104	590.594	57.9	911.1	43.4	317.188	923	107.594	267.25	114.6	829.2	1254	152.8	133.7	555.5	199.2	116.7	70.6	232.2	69.2													16.8209	7.019	6.104	6.714	14.038	15.259	6.714	32.654
396.594	246.1	3738.6	442.7	140.2	282.5	528.7	416.5	196.2		135.402	1122.91	541.1	70.9	118.1	161.812	114.6	1505.31	178.938	48.2	474.6	185.6	359.9	124.9	115.5	327.1	292	5.8	29.9	301													10.8063	11.292	8.24	8.545	26.55	23.499	7.019	20.447
689.906	1214.7	508.3	626.1	144.5	1026.1	88.1	103.2	1048.1		138.398	1142.09	314.3	937.3	55.7	287.5	53.7	216.594	201.812	1254	836.9	64.2	55.9	62.2	708	481.5	26.5	50.9	98.8	453.3													17.2502	7.629	4.272	6.409	32.349	18.921	6.714	29.297
271.594	208.1	3663.6	180.7	105.3	2188.7	380.8	799.4	292		80.3984	483.688	403	120.3	37.5	165	56.7	176.406	32.5	384.2	906.2	16.6	387.6	168.4	1524.3	428.5	60.8	227.6	117.3	514													16.694	12.207	17.395	17.09	35.4	18.005	7.019	25.635
77.2188	319.1	933.9	18.4	26.9	64.8	2320.6	116	1357.7		48	74.5	53.5	593.8	371.4	26.8125	177.3	58.7812	98.5625	934.7	453.1	28.5	546.8	56.5	114.6	668.1	58.3	45.2	151.9	51													30.0665	8.24	7.019	17.395	66.528	16.785	8.24	28.381
758.281	1610.8	1459.5	178.4	369.4	288.3	87.7	93.9	2212		69.6016	713.125	201.7	275.8	33.5	168.375	23.6	46.4062	273.188	1017	556	45	67.7	77.1	1542.9	111.2	197	103.3	26.6	301.7													7.65208	8.24	10.681	10.071	7.019	26.245	6.409	54.626
1796.41	737	1228.7	67.5	136.3	994.1	671	746.1	980.8		0.300781	200.594	89.2	28.2	58.7	58.1875	90.1	72.5	42.4375	426.8	680.8	113.3	87.3	663.9	720.7	253.8	192.6	48.2	28.5	741.6													16.5816	7.935	5.493	8.545	21.057	12.817	7.324	11.292
58.0938	749.9	406.8	556.3	689	60.4	982.8	191.8	214.8		278.801	123	140.8	360.6	45.6	36.5	65.8	97.2188	217.5	965.2	1523.4	246.4	192	300.6	976.1	244.7	483.6	123	99.7	380.3													10.6055	7.629	4.883	14.343	6.714	14.038	6.714	53.711
1358.31	221	1795.2	169	64.3	457.1	442.6	543.4	265.8		51.6992	545.906	66	202.3	42.2	97.4375	67.4	365.781	159.812	1376.7	249.3	127.5	210.7	404.4	385.2	166.8	36	102	33	467.3													30.7118	7.324	16.479	14.954	9.155	10.986	6.714	29.602
119	302	54.3	594.4	105.1	84.2	806.5	252.1	820.7		228.5	273.594	234.7	269.9	346.6	281.562	160.8	296.594	345.562	713.3	46.8	14.7	36	391.6	302.1	151.7	425.7	177.1	151.5	384.5													20.4595	8.24	7.629	6.104	12.207	10.071	8.85	17.395
1678	433.1	923	743.5	125	974.1	229.7	1.7	104.4		0.300781	1641.78	209.5	314.3	95	120.812	14.8	62.3125	255.688	628.5	1469.3	189.3	168.6	13.5	1627.3	442.4	152.4	35.7	68.1	231.5													14.3494	6.409	42.114	14.343	21.667	8.24	10.986	31.433
1306.69	182.8	1271.2	913.7	326.7	139	1017.9	72.9	196.6		69.7969	784.907	13	33.3	45.6	153.625	355.1	96.5938	74	509.3	1778.9	70.3	215.2	34.7	285.5	219.9	52.6	57.2	76.4	185.7													64.5202	8.545	8.24	15.564	16.479	43.64	6.714	19.836
209.906	113.3	118.9	282.9	322.6	440.7	22.1	66.2	109.4		312	179.5	117.8	246.9	177.9	345.875	114.2	215.094	122.5	575.6	226.5	118	22.3	114.9	1034.2	1096	16.9	76.5	19.5	608.9													17.7747	7.935	5.188	11.902	5.493	10.376	13.733	11.597
1509	533.1	1159	119.1	200.2	26.5	362.7	97.9	479.7		35.2031	417.312	27.2	268.4	105.8	14.4375	488.5	97.8125	523.75	165.8	763.5	363.3	481.6	447	586.3	139.6	208	53	11.3	239													8.65051	8.545	7.629	13.123	25.024	10.681	6.714	17.395
1313.09	705.2	548.2	863.4	385.6	108.5	718.1	45.7	418.5		121	249.5	169.9	351.5	241.5	665.562	256	90.9062	158.5	1517.5	1406.4	115.8	288.6	48.8	89.1	173	472.8	93.9	92.4	101.2													9.22461	8.24	21.362	10.681	14.343	11.597	9.46	21.057
253.406	261.4	271.1	1460.7	435.1	93.8	88.6	133.9	1151.2		209.898	0.59375	135.4	188.2	86.1	16.9375	709.6	494.406	48.5	451.8	39.1	252	106.4	86.5	1030.6	352.1	398.4	97.8	44.9	148.1													12.4756	11.292	5.188	17.395	14.038	7.935	6.409	14.648
571	85.3	17.4	1117.4	496.7	167.2	427.6	61.3	62.9		287.699	817.406	576.8	181.6	776.7	58.5	332.5	482.688	91.25	1352.1	440.7	22.8	232	644.1	16	318.9	170.6	142.4	21.4	107.8													12.397	10.071	5.798	7.019	14.038	12.512	6.714	30.823
1554.22	370.9	372.8	206.5	23.2	247.9	553.1	188.9	1882.7		137.102	141.688	469.9	295.8	62.6	540.25	66.9	187.688	440.438	555	494	518	381.5	70.5	531.1	496.4	19.5	25.6	204	219.3													14.8495	7.629	7.935	8.545	39.978	23.499	6.714	28.076
681.375	570.3	1427.8	21.7	22.3	269.6	181.8	43.8	53.3		56.3008	278.812	157.3	323.4	244.7	112.625	191.1	53.125	643	75.5	129.3	66.4	173.3	749.6	2931.4	14.5	173.9	201.4	107.5	400.7													59.9808	8.24	25.33	7.019	6.409	17.395	6.409	36.926
264.125	558.8	195.7	230.4	86.1	18.9	482.6	122.8	237		119.699	605	130.3	694.7	235.9	244.375	476.4	115.281	96.3125	506.3	219.6	97.7	49.5	342.6	983.1	215.8	613.6	104.3	113.3	227.5													44.3596	9.155	10.071	10.071	10.376	13.733	7.324	36.621
354.875	1191.5	2974.2	1750.8	103.2	5.2	87.7	152.8	238.1		622.801	209.5	46.6	327.4	46.6	28.625	94.3	153.219	849	1066.3	164.4	153.4	259.5	783.9	101.1	679	35	16.1	54	466.4													21.0739	14.648	10.071	6.104	28.381	22.888	6.409	18.005
474	350.7	265	4033.1	407.8	531.5	584.2	271.5	1214.4		197.598	603.781	28.1	1064.8	37.1	342.688	696.2	32.875	150.75	547.9	38.5	106.6	200.9	301.2	78.9	366.8	186	27.5	49	116.8													33.0817	86.06	4.883	6.409	7.324	12.817	6.409	16.479
1356.72	424.4	745.1	38.4	562.1	1041.2	1320.8	31.6	460.6		165	151.906	555.2	625.2	43.5	237	257.4	167.406	38.25	1753.4	734.9	295	145.7	135.8	429.8	150.6	107.3	20.9	30.2	402.7													41.7747	7.935	8.545	7.019	45.166	12.207	6.409	18.921
71.5938	397.1	698.5	77.3	96.5	211.5	496.8	9.3	1360.3		0.402344	33.7188	131.7	346.2	24.4	151.312	538.3	195.312	354.688	319.8	2346.8	119.6	50.2	147.9	645.2	33.4	19.2	21.7	70.8	168.4													24.356	7.935	14.954	6.714	14.648	7.324	6.714	29.297
62.5938	1573.9	714.3	202.2	437	543.8	125.9	155.1	1947.3		343.898	217.781	814.1	75.2	456.6	649.812	356	33.0938	751.312	1650	1234	88.1	44.5	450.2	239.1	164.7	13.8	84.1	134	476													16.2072	23.499	10.376	7.019	20.447	10.986	7.324	29.602
738.312	246.7	105.7	870.9	103.7	389.7	702.2	149.1	1538.6		314.602	30.2188	777.4	1060	104.9	40.6875	89.6	223.312	1109.88	29.6	259.7	1.4	89	512.9	461.9	803.7	176.9	107	57.2	363.4													45.8836	9.155	12.512	11.292	9.46	14.343	8.85	30.518
776.406	483.8	186.5	239.7	407.3	118.9	71.9	85.3	28.4		340.898	159.281	18.7	441.7	224.5	16.625	71.1	121.188	513.688	588.9	114	74.6	171.7	710.4	1502.5	325.3	135.8	110.5	26.3	114.6													14.3832	8.24	5.188	10.376	6.714	10.376	6.409	32.654
157.594	502.5	1706.2	143.8	117.1	632.2	876.2	504.7	29.7		236.199	294.812	953.5	194.6	369.5	304.5	270	1.09375	165.438	793.1	375.1	155.3	512.7	134.8	39.2	363.9	178.5	76.1	44.5	59.8													16.8078	7.324	8.24	6.714	9.46	10.071	8.24	14.954
832.781	548.3	272.6	1862.6	70.1	638	538.2	438	131.5		180.199	643.688	777.6	609.4	157.8	230	1034	103.219	603.188	31.5	329.9	36.5	404.9	320	193.4	262.5	204.6	176	30.5	691.8													10.9687	8.85	14.648	19.531	6.714	18.921	6.714	18.311
185.812	253.9	1912	1054.4	67.5	569.9	258.7	368.6	126.5		35.9023	1204.91	484.3	41.4	59.4	65.875	359.3	558.781	148.562	362.7	308.2	177.2	190.1	103.3	57.6	48.1	40.3	51.5	77.7	475.3													8.99656	7.324	12.512	13.733	7.019	14.648	7.935	11.597
51.9062	434.5	141.7	77.7	184.8	1417.2	271	46.1	1133.4		138.098	782	359.2	176.7	26.6	428.188	143.4	48.8125	412.25	391.8	1053.1	413.9	383.5	194.1	567.1	32.6	105.7	41.7	93.4	214.5													11.3023	6.714	6.104	10.681	21.973	8.545	7.019	16.785
894.281	244.2	3084.9	150.7	17.4	579	418.7	179.3	867.4		307.102	410.688	364.5	92.5	182.5	199.438	185.4	48.1875	621.562	23.5	817.1	68.3	551.9	161.9	67.1	425.3	54.1	76.5	25	221.5													28.1921	7.324	9.46	5.798	8.24	21.973	8.545	42.419
1089.81	709.1	881.2	1009	324.5	303.4	169.5	64.8	705.3		176.699	289.719	75.7	656.9	47.4	293.688	398.3	99	114.812	325.5	762.9	62.8	75.1	1084.7	500.4	228.3	79.3	18.1	109.7	301													15.9151	25.635	28.992	19.226	6.409	15.869	6.714	15.259
0.40625	477.2	1.3	1673.8	325.2	979.6	107.8	143.9	2		372.801	238.281	279.3	492.6	85.2	48.1875	356.8	53.3125	269.375	135	27.8	117.4	339.4	60.8	1744.8	289.5	42.6	8.7	149.7	147													16.066	9.155	32.043	8.24	8.85	13.428	7.019	27.161
752.188	135.6	352.4	896.9	144.8	459.9	597.3	199	570.9		166.199	397	205.9	354.8	270.3	223.375	110.8	156.5	452.812	1425.6	126.6	86.5	226.2	115.8	1224.9	244.8	427.1	6.3	61.7	1015													19.3522	6.714	9.155	6.104	25.024	16.174	7.019	26.245
117.094	2536.4	427.2	1451.7	220.5	2335.1	355.2	112.9	324.2		901.199	153.719	431	185.5	172.8	852.438	583.2	313.5	527.5	492.9	311.5	321.8	402.4	137.3	203.8	213.9	253.6	28.8	45.9	137.3													19.4002	12.817	6.104	6.104	8.24	12.817	7.019	11.292
319	1113.7	441.3	122.4	79.1	682.5	27.1	67.5	583.3		158.402	124.281	744.5	47.7	197.1	53.375	433.9	124.906	1015.69	103	131	711.8	62.5	585.2	279.4	92.3	72.3	93.5	50.3	92.6													20.9591	6.409	20.142	7.629	9.766	12.817	9.155	31.738
895	63.6	300.8	507.8	149.1	87	383.2	272.1	260.4		157.098	24.7188	97.5	245.7	34.9	224.812	128.1	59	216	1971.3	1449.4	22.4	36.5	150.1	377.5	166	55.1	16.6	22.4	168.9													11.905	7.629	7.935	12.512	26.55	18.311	6.409	20.752
158.812	1297.4	312.8	1734.1	72.7	546.5	558.8	554.8	2177		340.203	313.906	574.8	357.2	22.1	123.5	20.7	308.781	251.625	24.8	78.2	79.6	57.8	289.3	2141.4	328	962	110.8	50.1	192.2													10.7515	6.409	5.493	7.324	8.24	22.583	6.409	27.466
548.188	242.7	53.1	185.1	131.3	978.9	387.7	133.9	1334.2		295.199	352	623.7	51	197.1	603.312	59.3	43.9062	1164.31	518.5	311.5	128.8	193.6	46	674.4	48.6	241.2	71.8	113.6	39													16.8835	18.005	12.207	7.935	18.311	7.935	6.104	14.343
57.7188	852.9	1177.7	32.2	289.3	297.7	333.2	46.3	198		309.301	192.094	463.3	42.3	79.4	238	10.3	232.312	122.562	809.1	682.9	159.2	189.4	17.3	648.9	97.9	119	155.8	79	61.4													17.3277	7.629	10.681	19.226	6.104	16.174	7.324	15.259
280.906	295.9	1948.4	1345.6	77	108.6	127.2	604.9	87.7		799.598	98.1875	147.6	528.5	146.8	382.312	61	257.594	121.375	230.6	1928	29.5	88	51	307.9	330.6	293.9	28	93	533.1													19.0311	6.409	10.376	5.493	23.193	14.038	6.104	36.926
248.281	1093.8	104.6	835.2	323	133.8	406.5	286.2	97.9		336.199	57.0938	163.8	146.1	109.2	91.5625	237	359.281	1067.25	195.9	41.6	223.4	49.7	710.7	1441.7	130	46	15.3	26	36.3													9.54452	8.24	7.935	7.629	12.512	37.842	6.714	37.231
316.406	1240	3472.8	840.9	230.4	34.3	296.1	268.3	2764.4		139.203	553.406	35.6	160.5	371.6	145.312	68.7	82.9062	184.5	91.9	296.5	281.5	180.6	401.7	41	1864.2	84.8	136.8	115.7	545.7													35.283	12.817	10.986	18.616	17.7	10.986	7.324	32.654
174.688	695.2	1904.7	237	31.6	2697.7	385.2	127.7	376.9		67.5	72.4062	386.9	922.7	327.2	249.812	33	106.406	88.6875	266.3	163.9	290.7	272.2	55	114.9	291.8	85.6	50.3	156.9	454.4													18.2734	24.109	10.376	8.24	15.564	13.123	7.324	18.311
382.219	826.4	961.2	791.4	182.2	592.2	344.5	31.7	550		197.898	823.812	647.8	341	167.2	56.6875	430.6	76.6875	334.5	201.2	196.3	390.8	282.1	229.6	7.9	1702.3	180.4	16.8	53.1	183.3													14.1621	6.409	7.324	5.798	17.395	48.828	6.104	19.836
366.5	965.4	2638.8	417.3	202.8	344	357.9	121.6	1342.4		625.199	662.688	405	66	337.5	136.812	360.1	221.219	355.562	78.1	420.9	553.9	483.2	418.9	23.9	37.6	69.4	96.1	30.9	128.5													16.9278	10.376	30.518	7.324	13.428	16.785	6.104	27.771
451	350.4	3404.5	189.2	79.9	149.1	145.2	245.6	397.2		411.902	588.688	58.2	83.3	96.7	47	1170.7	82.2812	57.9375	2090.5	238.8	127.5	192.2	249	382.5	405.5	539.7	27	248.8	16.1													12.7761	37.231	8.545	9.155	10.986	12.207	8.85	18.311
107.5	234.7	471.1	2137.7	189.8	209.3	1215.7	343.5	908.3		149.797	112.406	247.4	628.6	92.7	73.3125	1227.5	179.406	1368.38	226.5	100.8	652.2	32.1	326.3	278.1	271.4	102.3	61	161.9	291.6													15.9691	7.324	18.616	12.207	9.155	18.311	6.714	61.035
60	1089.7	10732.9	516.6	438	290.5	38.2	42.4	1401.2		189.703	464.5	296.4	350.9	119.7	204.5	37	30.5938	145.812	395.7	241.3	184.6	170.6	225	679.1	488.5	114.6	33.2	66.9	80.7													23.8264	13.123	5.493	8.545	6.104	10.681	10.376	26.245
36.0938	581.8	281.9	257.8	22.9	560.7	100.7	288.5	598.1		387.297	162.219	645.9	379.6	114.5	61.1875	10.3	294.219	53.3125	567.9	49	32	562.9	575	36.9	174	269.2	41.6	32.6	86.2													11.5786	7.324	5.798	5.798	30.212	7.935	7.324	13.428
79.9062	952.3	2482.3	221.8	311.4	17.7	334.3	89.1	28.7		43.7031	304.281	1075.1	68.9	325.1	80.5	134.4	49	212.562	1007.1	38.6	174.2	42.1	378.6	32.3	370.7	142.2	77.7	27.3	243.4													55.4298	21.973	5.798	5.798	5.493	8.545	6.714	24.109
174.594	404.1	1399.6	933	269.9	50.1	240	602.9	997.3		228.5	130.094	208.5	138.6	121.9	178.5	62.7	207.281	511.812	664.2	426.9	180.2	174.9	187.1	564.2	48.8	63.2	129.9	26.6	314.9													73.4234	6.714	7.629	7.324	12.207	7.935	6.104	14.648
37.6875	1022.3	726.2	2692.2	24	63.2	257.4	66	876.3		67.7969	76.125	329.2	256.7	225.1	386.312	120.6	182.219	281.438	447.3	1243.8	112.2	47.6	126.1	99	155.8	46.6	100.9	55.9	2.4													7.97939	18.616	9.155	7.019	28.381	11.597	6.714	25.635
155.312	79.8	119.4	149.3	192.9	752.3	213.9	320.7	4239.1		157	1086.59	223.7	427	269.5	131.875	72	59	478.062	308.1	937	100	95.1	400.9	547.1	449.9	20.7	20.8	61.5	256.6													9.76343	11.292	7.629	6.104	14.038	10.986	11.292	23.804
1362.5	243	482	1014	225.9	751.6	156.1	117.3	51.3		656.301	190.688	677	105.6	188.8	214.312	577.1	78.9062	382.438	602.9	190.9	148.6	37.2	383.4	1187.2	181.5	125.7	38	64.9	27.8													17.5944	8.85	5.188	23.193	14.648	17.395	7.629	14.648
121.312	1883.4	3152.4	933.4	14.3	1224.7	505.5	1.3	27.9		286	25.3125	107.5	470.2	94.5	320.312	40.4	239.188	101.5	347.6	1586.8	369.8	451.1	93	1082.5	243.1	476	219.2	10.4	273.4													12.4454	11.597	9.155	7.935	27.466	11.902	7.935	25.94
897.375	652.9	67.8	588.7	159	1889.9	49.7	129.5	31.4		55.4023	143.906	1172.6	98.2	444	55.375	171.9	158.188	53.5625	207	600.4	25.6	180	135.4	1744.4	198	42.6	72.1	47.5	195.7													9.41721	8.24	5.798	12.207	18.005	8.85	7.019	41.504
255.219	1483.8	517.8	1436.5	253	659.6	221.4	57.5	251.4		1083.1	165	1264.7	485.9	109.1	322.625	42.2	13.125	140	289.9	404.4	173.8	132.6	788.3	336.9	166	109.5	48.2	96.8	178.6													19.2311	17.09	8.545	18.616	11.597	22.278	6.409	14.038
1503.59	749.5	4501.3	1225.6	970.3	108.5	103	38.3	322.7		410	358	72.9	173.2	11	26.5	262.7	0.78125	434.312	149	704.8	251.9	128.6	533.1	62.6	42.9	333.2	50.5	42.2	605.4													11.2165	8.24	11.597	10.071	42.725	19.531	7.629	36.316
669.812	714.4	640.8	111.9	157.2	369.9	245.3	213.7	2054.2		520.5	63.375	920.4	55.3	11.6	73.875	278.4	111.906	335.625	349.5	1264.2	95.4	38.5	143.9	563.9	745.6	52.5	77.9	33.8	112.3													13.888	9.46	5.493	6.409	7.935	27.161	7.324	29.297
341.375	471.1	72.9	306.2	130	229.1	83.3	63.1	700.9		184.301	58.8125	29	270.8	217.9	240.625	408.6	59.4062	1179.06	1011.4	113.8	443	217.7	400.1	495.9	141.3	15.9	182.3	50.5	136.4													60.1867	9.766	4.883	17.7	29.297	8.545	8.85	10.986
215.406	1145.6	656.8	905	46.2	476.3	55	185.9	627.7		0.398438	0.40625	343	351	116.5	58.0625	559.5	53	182.5	942.7	802.3	80	549.8	145.1	722.5	638.4	119.5	91.4	68.8	468.9													10.943	10.376	8.24	8.24	25.94	8.85	6.104	37.231
83.4062	128.1	3602.9	1427.2	347.4	22.7	517.1	51.3	345.9		138.5	277.281	1010.1	32	284.5	33.1875	610.2	66.4062	482.625	2118.8	355.2	623.7	83.3	43.7	29.7	54.1	156.2	185.1	85.7	231.4													11.4766	55.847	7.019	7.629	9.46	14.343	6.104	44.556
1301.91	334.6	646.1	569.4	572.8	242.9	62.8	49.2	43.4		79.4023	220.5	461.2	252.9	662.3	62.8125	279.7	3.28125	161.312	229.6	325.1	40.6	505.7	68	179.6	131.2	649.7	28.9	21.1	95.6													10.4658	10.681	18.005	6.104	16.479	9.155	7.324	33.264
56.9062	2049.8	149.8	1114.8	302.3	96.4	263.8	400.1	93.8		341.098	251.625	76.7	218.1	56.9	55.6875	229.3	204.5	21.75	1452.9	100.4	190.2	27.5	257	784.2	141.6	400.1	35.2	166.4	179.1													13.9868	10.071	35.095	6.409	21.057	25.024	8.545	58.594
165	133.1	1948.6	1614.9	87.9	76.3	80.1	54.9	430.4		70.8008	147.5	188.2	450.3	195.4	164.5	165.4	363.812	275.812	266.6	417.3	28.8	130.9	663.4	379.3	192.8	12.6	111.9	78.8	107													10.3643	7.629	26.55	8.24	18.921	16.785	6.714	21.057
208.906	542.4	342.2	63.8	185.8	729.5	1064.3	153.2	41.3		105.102	110.188	88.5	77.6	560.1	565.625	46.7	523.188	105.812	2252.5	249.7	114.5	24.8	303.6	158.7	32.8	246.7	80.2	176.3	60.1													11.4234	11.902	10.071	19.226	11.597	14.038	6.409	42.725
1912	97.5	822.8	2020.5	254.4	176.4	818.7	258.4	43.7		110.098	341.5	419.2	394.8	566.9	67.5	547.5	88.8125	615.312	248.4	255.6	42.6	121.4	499.8	504.8	81.2	420.4	292.1	67.9	376.9													13.9076	7.629	9.155	10.681	28.381	13.733	8.24	15.259
740.094	752.2	146.5	1061	165.6	2800.5	257.5	173.2	267.5		413.602	208	76.6	416.2	184.1	179.125	192.2	443.688	718.312	3946.3	834.5	37.6	224.2	15	174.4	3.3	63.3	68.8	59.2	408.7													13.5098	7.019	5.188	6.104	7.019	12.817	6.104	53.101
124.094	50.2	1767.6	667	124.1	151.9	1508.5	19.7	284.5		297.102	1015.19	226.1	513.8	271.2	289.188	74.1	122.312	249	912.5	83.8	115.4	455.5	380.3	205.8	1146.2	30.3	104.4	113.8	685.4													10.0684	17.7	8.545	6.714	9.155	11.292	7.629	16.785
615	1197.4	549.2	70.8	99.3	35.1	90	35	2038.3		492.5	0.40625	82.7	522.9	51.7	261.188	90.5	375.406	37.0625	895.9	1367.6	757.1	64.7	11.5	146.6	318.8	301.6	149.7	92.6	147													10.1142	7.324	10.986	5.798	6.104	23.193	6.104	27.771
503.594	602.7	2004.9	1195.3	388.6	312.6	168.5	115.3	83.7		270.699	403.219	89.1	118.5	64.5	676.375	89.2	0.59375	485.688	146.3	94.1	53.7	391.4	767.8	158.6	61.8	313.8	54.5	2.1	116.2													87.3942	7.629	12.817	7.324	9.155	13.123	6.104	24.414
410.625	1627.4	156.6	642.7	120.2	146.5	622.5	27	273.1		152.301	83.2812	217.8	273.5	64.4	625.438	59.4	122.594	375.812	103.4	467.6	489.7	177	91.1	418.9	125	613	10.6	53.7	448.7													12.4771	7.019	23.804	8.545	15.869	10.986	10.376	20.142
599.782	214.6	870.1	206.1	139.7	2038.1	318.1	54.3	204.7		138	412.219	168	662.2	70.6	447.562	303.2	338.188	82.6875	657	381.9	109	52.6	289.1	264.2	1358	234.1	21.5	69	95.6													33.0205	7.935	22.583	8.545	5.798	8.85	6.104	25.635
575.406	48.8	245.1	548.2	98.2	1657.7	744.7	37.3	1219.1		214.297	1914.69	332.2	332.8	319	71.9375	477.8	129.719	130.312	961.5	171.4	200.2	163.8	412.8	1471.6	685.5	125.2	69.3	51.8	40													75.2998	12.817	9.766	12.207	25.33	12.512	6.104	24.414
224.312	181.8	572.1	236	527.4	281.4	201.6	426.7	131.6		645	1198.5	877	32.2	128.3	45.8125	357.6	77.0938	90	467.4	1158.1	1021	550.7	219.1	76.7	510.1	363.8	41.2	94.9	816.1													8.16489	6.104	5.188	7.324	10.681	19.531	7.935	18.311
434.094	2790.8	1090.8	457.8	89.4	942.3	626.3	35.6	31.9		169.399	345.594	542.1	428.7	29.7	215	299	234	44.4375	2088.7	1877.3	384.4	523.2	0	212.3	141	210.5	245.4	13.8	199													11.8764	8.85	5.798	20.142	14.343	19.836	8.545	13.733
0.59375	113.5	343.9	90.2	140.1	161.5	106.2	15.3	40.6		0.398499	120.906	134.1	1156.4	585.5	149.875	145.4	403.094	330.5	472.6	1949.2	772.7	725.3	0.6	760.8	127.9	169.8	300.5	117.6	200.2													11.6275	11.597	5.493	7.629	14.343	26.245	7.019	12.817
344.5	601.8	1395.2	306	181.1	1320.3	1.1	49.7	119.6		363.602	1486.31	186.4	281.3	47.2	39.375	358	57.0938	849	74.9	58.9	172.5	38.8	19	2183.5	827.3	60.8	54.6	21.9	360.2													11.1043	6.714	10.071	5.493	10.071	24.719	9.46	25.33
498	934.2	2067.1	64.9	115.7	559.5	330.7	130.3	144.9		120.398	697.781	181.8	284.6	296.8	239.125	107	68.2188	281.562	249.9	452.1	478.6	299.9	103.3	538	788.9	275.5	290.6	15.9	474.1													33.0086	20.447	15.564	17.7	5.798	17.7	6.104	27.466
938.188	289.4	7013	47.5	372	252.2	119.6	79.7	2974.2		231.5	930.094	397	357.7	441.2	4.8125	454.3	90.9062	213.812	309.2	821.7	296.3	91.3	349.5	230.9	261.6	264	332.6	65.8	317.3													24.4417	6.409	11.597	5.493	21.362	13.733	7.935	18.005
2025.41	453.3	801	384.7	113	149.6	726.7	163.4	685.5		71.703	682.625	81.3	461.7	168.5	353.812	146.1	35	538.875	1014.3	1163.1	38.7	282.2	268.6	798.9	369.6	248.6	134.8	35.9	252.8													76.8329	11.597	6.104	8.545	27.771	36.316	6.714	52.795
1596.31	410	722.2	895.3	373.7	34	25.2	222.4	601.6		539.102	486.5	181.1	719.7	384	219.188	12.4	189.781	186.5	116.9	95.8	30.1	31.9	348.4	2526	371	278.2	152.4	129	445.1													14.2803	14.343	16.174	16.785	16.479	8.24	8.545	10.986
399.906	1107.2	2230.1	153.5	536.9	50.9	50.5	18.3	24.3		637.297	18.5938	915	309.4	579.2	318.562	301.5	56.8125	595.812	474	544.6	984.6	20.3	254	402.3	272.3	32	446.3	47.8	80.1													11.6512	7.935	6.104	7.019	36.621	19.836	9.46	35.706
126.094	419.2	184.8	1265	118.3	496.1	1108.1	112	352.2		58	67.4062	22.9	189.9	736.4	33.125	38	33.5	662.438	248	344.3	108.7	214.3	174.4	1210.3	333.3	71.8	25.8	93.8	478.2													10.1997	6.409	22.583	6.104	43.945	9.766	8.24	26.855
286.406	218.4	1457.1	653	51.2	828.6	1628.1	562.7	249		47.2031	155.688	309.3	394.5	275	160.125	306.9	107.188	1104.06	816.9	54.1	137	153.9	146.2	314.2	330	674.5	21.4	10.4	157.6													11.9119	7.324	4.272	6.714	28.687	15.869	6.104	29.907
199.281	558.3	805.2	536.1	107.1	511.9	266.3	42.9	120.6		115	59	331.3	1120.9	83.2	94	154.9	1.09375	405.5	1249.5	512.7	12.6	579.5	182.3	250.3	59.4	322.7	92.1	101.4	104													17.6333	15.259	4.578	7.629	13.123	14.343	6.409	21.667
620.812	365.8	52.8	1973.1	93.3	15.8	166.6	196.1	324.8		214.196	168.906	445.3	41.9	370.2	456	108.7	77.2188	1011.5	483.1	1185.1	26.6	66.4	680.8	270.6	1.8	316.5	173	93	101													40.3158	7.324	6.714	7.019	15.869	27.466	6.409	22.583
113.406	160.2	461.3	1056.6	829.3	333.5	792.4	99.1	270.5		262.804	426.781	120.4	917.1	136.1	75.5	181.7	218.906	748.625	1409.4	166	112.6	655.5	38.8	280.8	60.2	150.5	150.3	18.5	539.1													9.06567	6.714	8.545	5.798	10.681	10.986	6.409	37.231
752.094	226.6	1175.6	119	108.1	267.5	211.8	149.5	167.2		366.398	787	185.1	56.1	627.1	176.25	375.6	87	698.688	1602.4	636.6	30.8	485.7	336.9	1123.8	249.4	14	104.4	12.8	135.9													16.6621	7.629	5.493	14.038	10.376	14.038	6.104	32.959
708.688	384.6	302.4	117.1	159.1	1019.3	339.2	23.6	489.8		807.602	179.312	180.6	553.1	175.6	188.438	126.6	109.188	235.312	40	590.2	130.9	332.7	1001.6	1582	370	453.4	35.3	146	83													11.545	8.85	11.597	14.343	5.798	15.564	7.019	27.466
183.719	159.4	71.2	499.5	58.8	551	93.5	99.2	1226		127.102	478.094	24.7	67.3	1121.7	197	203.5	26.5938	137.5	192.9	219.5	153.7	466.7	1280	2331.6	282.3	269.9	31.9	55.4	97.2													12.5004	12.817	7.629	17.395	40.283	13.428	7.019	32.959
221.281	1050.8	251.5	100.8	87.5	267.6	679.1	70.5	438.9		181.5	234.406	101.9	101.7	409.7	502	747.4	154.094	484.062	421.6	255.2	155.3	99.7	321.6	1014.5	110.5	62.7	84.2	64	145.2													11.8762	8.85	7.019	16.479	6.714	28.687	6.714	11.292
1000.91	53.9	307	952.7	18.5	607.8	460.9	25.2	557.6		220.398	475.406	1230.5	486.9	203.3	406.812	259.5	240.219	175.812	227.6	614.1	28.4	681.8	131.4	599.5	124	21.5	9.6	34.7	264.7													22.4043	10.071	7.019	7.324	26.855	26.245	9.155	22.278
159.5	116.5	559.3	438.2	384.8	420.7	74.2	334.7	720.7		118.398	243.781	56.1	546.3	415.6	106.188	122.1	44.6875	1148.31	841	240.7	843	278.9	266.7	183.7	410.7	109.3	16.2	76.8	60.4													18.6371	28.992	8.24	6.409	27.161	18.921	6.104	18.311
270.188	201.5	840.6	624.5	309.1	170.9	250.8	67.4	440.6		321.297	383.906	39.1	187.2	51.2	215.812	152.3	85.9062	717.312	1222	163.3	22.6	443.4	51	1015.6	39.6	175.5	32.6	104.4	233.1													20.0964	9.766	4.578	5.493	6.104	32.349	7.935	18.005
712.812	837.2	673.6	435.3	203.9	34.2	405.1	302.8	93.3		0.601563	59.5938	72.4	35.4	25.4	158.5	7	249.812	76.375	308.9	295.5	246.1	23.2	697.5	936.3	286.3	548.6	131.3	21.8	664.6													26.6296	10.681	6.409	39.673	16.174	11.597	6.714	12.817
1456.59	63.7	270.2	5002.8	18.4	415.8	1.9	88.6	149.9		102.102	236.625	493	41.8	152.9	132.188	290.6	0.59375	80.4375	779.2	368.5	320.1	128	27.9	1020.6	250.6	26.8	59.8	50.2	178.7													7.80006	6.104	12.512	17.7	26.55	86.67	6.409	26.55
469.312	114.4	1583.3	1567.9	167.8	647.6	415.6	369.4	693.3		430.703	88.875	181.1	402.7	159.7	42.875	24.9	138.906	282	804	351.3	362.8	31.1	274	116.5	196.9	68.4	45.7	20.2	108.1													21.4311	7.935	7.935	6.714	14.648	10.071	7.629	14.038
1340.41	492.7	73.4	89.2	149.6	423.7	25.4	24	568.5		274.5	1866	685.1	157.9	37.6	128.125	797.7	207.094	326.688	208.1	196.9	184.7	811.9	149.3	1211	202.7	159.8	187	42.6														48.5997	10.071	7.324	6.104	16.174	25.635	6.409	20.142
546.594	133	1564.2	96	248.8	130.8	661.4	96.8	21.9		167.398	796.906	57.5	207	178	165.875	374.3	1.6875	584.5	462.3	175.9	213.7	15.1	1198.1	536.1	396.2	39.4	110.7	62.4														42.4463	9.155	6.714	8.24	9.766	68.97	6.714	27.161
384.281	82.3	396.8	843.9	155.7	448.8	55.6	193.5	199.7		553.695	164.594	135.3	60.1	24.9	292.938	26.2	91.8125	336.812	941.7	23.4	89.4	23.1	497	398.3	550.9	161.9	76.8	152.8														10.2066	7.629	25.635	11.902	13.123	39.368	10.376	21.973
1133	765.3	4373.4	234.1	225.5	185	317.5	98.6	104.9		138.102	201.812	429.8	65.3	355	15.6875	102.2	180.594	204.875	928.8	1617	309.2	58.8	229.9	1917.2	444	574.9	297.8	16.6														9.00282	7.019	4.578	18.311	21.362	8.85	8.24	50.354
208.312	494.8	229.5	951.6	83.9	545.9	317.1	232.7	676.8		433.102	641	387.3	1311.6	120.3	537.375	786.9	51.1875	733.875	338	68	70.6	59	1493.9	916.4	594.1	49.3	19.6	64.6														74.7974	11.902	17.7	23.499	5.798	9.766	7.019	14.954
1262.69	12.6	1450.5	78.7	317.3	86.9	117	19.7	222.4		200.102	297.188	31.1	100.3	20.3	28.4375	25.8	26	159.312	1138.8	143.3	119	329.9	193.2	1328.3	539.8	720.2	141.5	17.3														135.777	18.005	10.071	10.376	38.147	8.85	8.85	14.954
319.906	501.5	1613.3	347.1	26.3	43.3	754.2	20.6	209.4		323.398	120.219	211.8	322.6	605.7	27.75	20.6	55.625	260.312	22	931.4	247.8	223.6	94.5	506.5	469.5	50.7	36.4	152.9														26.4021	9.155	6.104	14.954	18.311	18.616	8.24	49.133
91.5938	79	2278.1	2230.2	249.7	1284.2	180.8	95.1	1532.2		402.797	82	619.9	592.8	122.6	333	239.9	52.375	966.188	445.6	671.9	473.2	57.6	125.3	115.8	95.2	29	288.9	36.4														29.1598	10.986	4.578	5.493	9.155	9.46	7.019	22.583
36.2188	786.3	912	2723.2	218.3	393.5	460.3	179.9	643.8		235.305	218.906	270.5	177.5	496.5	166.625	390.6	69.3125	1149.5	330.9	70.7	404.1	237.4	236.3	365.5	213.7	73.7	32.7	192.3														15.2165	14.954	6.104	16.479	15.259	32.654	6.714	26.245
649.281	1055.6	2822.3	66.1	104.3	62.6	480.6	22.4	1261.5		47.7969	486.594	384.3	129.4	594.5	121.312	305.3	90.5	101.625	55.2	50.7	300.6	115.6	116	364.6	654.5	542.5	15.6	36.8														8.72725	7.629	5.493	14.343	9.766	17.09	6.104	14.648
93.125	434.3	1570.6	872.3	68	705.5	572.7	22.6	841.8		230.398	96.6875	93.4	100.3	35	293.562	490.2	44.6875	206	840.8	180.1	18.2	190.6	263.3	68.5	243.8	263.1	138.7	78														29.7711	10.986	8.24	15.564	9.155	35.4	6.104	12.817
476.781	628.5	34.9	1017.3	515.5	373.1	1241.5	198.1	308.4		81.6016	91.2188	137.1	134.3	97.3	89.9375	110.3	513.312	312	249.1	506.9	52.1	81	463.8	757	119	433.2	272.8	100.2														15.8926	10.376	6.409	14.343	10.376	21.362	10.376	38.147
244.219	63.8	170.5	308.3	41.9	143.4	260.3	164.3	133.5		842.102	536	240.7	35.7	538.3	33.0625	872.6	191.312	120.875	956.3	108.3	72.1	12	465.4	387.7	76.9	90.6	184.4	24.8														23.2191	9.155	7.324	9.46	20.447	10.986	10.376	19.836
664.875	1233.7	355.4	38.8	453.8	707.5	482.1	612.8	499.5		226.5	426.375	95.5	206.4	106.7	570.125	290.6	59.875	371.438	1945.2	205.1	134.3	278.4	23.7	477.9	554.5	154.5	341.4	32.9														33.8762	13.428	4.578	9.46	17.09	17.395	7.629	12.817
812.719	510.8	722.8	672.7	21.2	888.3	327.2	22	1096.7		81	1396.81	216.1	66.8	973	80.625	178.6	109.719	190.188	432.8	826.4	126.1	274.2	382.7	881.2	815.9	356.1	41.9	100.2														16.8222	12.512	5.493	10.681	20.752	14.648	8.85	23.804
329.688	733.6	219.5	134.9	114.6	0	35.6	34.8	627.6		157.5	1246.09	270.3	758.8	115.6	179.5	1148.2	222	321.188	903.1	173.1	101.4	27	53.2	350.8	42.4	41.6	28.3	11.1														23.2458	12.817	14.954	14.648	16.174	14.648	7.629	14.038
1706.22	1309.3	2685.2	1249	204.8	2971.9	782.3	52.4	193.2		347.797	272.906	1059.6	454.6	246.1	103	126.9	85.7812	125.312	3147.6	235.2	705.9	476	216.1	258.7	46	288.5	227	54.8														13.6889	13.428	6.409	10.071	20.752	13.428	6.409	28.381
1326.59	1615.2	914.2	95.2	120.2	68	1527	274.7	640.9		351.805	872.188	254.2	156.8	98.5	215.5	96	257.625	282.688	1378.5	88.5	168.6	205.2	648.2	106.9	1213.6	360.3	149.3	94.8														18.4764	7.324	5.188	7.935	5.493	10.376	10.071	22.278
271.906	1527.4	139.9	322.4	201.9	70.2	957.9	60.3	880.4		352.695	186.719	272.8	74	456.2	379.062	248.5	479.188	1997.12	363.4	2429.8	168	57.3	238	770.1	128.8	99.7	15	177														20.839	24.414	7.019	18.921	5.493	22.278	11.902	54.932
241.5	773.4	16	364.7	48.5	619.4	219.6	64.4	625.7		240.102	298.406	31.8	132.4	1728.8	34.3125	200	73.5	1357.5	990.5	1292.9	30.3	195.5	121.3	588.5	236.8	225.8	43.9	93.4														36.5765	9.155	14.343	10.071	13.428	11.597	6.104	41.199
188.875	148.1	1259.5	237.9	207	141.7	0.5	308.8	149.2		200	252.781	155.7	55.3	193.2	96.1875	29.9	253.5	284.5	1038.1	1163.2	681	258.2	115	1726.3	661.5	1294.9	66.7	49.7														13.8855	7.629	15.564	7.935	23.499	18.616	7.629	14.343
2144.12	284.2	2051.8	1530.9	190.2	339.2	460.9	44	464.6		510	180.906	47.8	346.8	565.1	297.438	260.5	89.5938	679.5	555.1	24.2	126.2	73.4	223.6	112.7	305.8	132.1	16.8	103.6														9.41184	14.954	4.272	13.428	8.24	13.123	6.104	21.667
1228.5	2759.4	577.3	2352.8	46.8	719	87.6	223.2	384		336.805	132.094	466.7	279.5	2153.4	143.688	114.7	91.4062	413.75	92.1	119.6	280.7	254	140.5	79.4	496.4	416.3	15.2	61.9														9.92345	12.817	4.883	15.869	10.376	10.986	7.324	34.18
862.188	422.1	2542.2	415.9	257.8	39.8	48.6	17.8	94.7		149.594	398.406	351.8	810.9	59	161	79.6	307.594	122.312	698.8	121.5	51.9	43.5	44.2	161.4	201.1	76.4	64.4	25.9														16.8331	10.376	4.272	7.324	7.019	10.376	7.629	21.362
239.906	1250.3	409.2	758.4	218.5	0	422	745.4	483.7		917.805	1393.19	300.4	183	2324.2	98.1875	77.5	49.7188	576.688	523.8	13	51.7	42.3	1298.2	290.7	529.2	320.3	120.7	37.6														29.2348	8.24	6.409	15.564	6.409	10.376	7.019	11.902
269.281	1638.1	1737.3	128.9	138.9	389.7	0.5	85.5	1761.6		44.1953	336	230.8	747.3	561.7	67	103.2	48.375	362.812	63.5	540.2	714.6	58.8	120.6	1182.7	35.3	143.2	305	46.1														8.25433	7.019	14.343	22.278	15.259	18.005	7.019	34.485
1503.62	1012	134.1	289.3	212.4	501.3	1627.3	426.2	510.4		239.203	321.812	765.9	109.4	1157.6	132.125	66.6	0.90625	443.125	822.6	794.3	35.4	14.7	230.1	1272	255.8	299.9	140.3	62.8														26.3974	13.428	9.766	14.343	8.24	36.926	6.714	26.55
145.688	565.5	711.7	761.3	188.2	413.8	193.4	84.2	247.6		106.5	582.906	140.2	1513.2	45.5	152.688	151.9	67	43.0625	1583	710.4	343.2	132.3	171.1	782.8	32.1	41.2	115.6	31.8														19.4371	6.409	8.24	6.714	16.479	13.733	6.104	30.823
1264.5	1624.6	280.2	2740.2	74	1057.3	778.7	13.2	898.7		138.398	477.5	18.4	34.4	23.8	76.3125	78.9	72.8125	316.625	156	419	640.5	215.6	234.5	1347.4	168.1	96.4	29.5	112.2														9.97296	8.24	6.409	5.798	6.104	89.722	6.409	25.94
94.3125	495	3770.2	2972.6	128.5	0.1	206.7	579.7	413.6		83.8984	376.594	199.8	425.4	120.9	74.1875	156.5	100	107.125	1051.3	213.9	282.9	101.4	18.7	276.4	234	785.4	29.4	125.1														25.1294	8.24	6.409	13.733	32.043	91.248	7.324	21.667
407.281	312	894.1	136.7	851.7	85.5	919.9	70.2	1115.7		0.304688	380	900.5	146.1	331.5	206.5	159.2	51.0938	586.188	1058.5	924.3	113	96.9	35.9	2030	1100.2	239.4	395.6	83.1														12.6772	13.123	14.648	12.512	66.834	17.395	6.104	40.283
257.719	144.1	1209.1	1852.9	154.3	1011.9	384.5	62.8	539.1		790.398	693.812	908.9	296	513.3	420.875	102.9	66.6875	72.5	523.1	368.4	94.7	483.1	217.1	281.8	363.7	19.6	128.2	24.5														9.54653	12.207	9.766	6.409	24.414	9.46	6.104	14.648
622.875	209.5	253.1	2223.7	412.3	94.8	148	192.7	745.9		453	198.281	494.3	125	498.4	72.625	342.8	106.125	468.375	385.2	361.1	10.7	65.5	166.3	134.7	260.7	293.5	73.7	96.7														7.99746	8.85	4.883	5.493	15.564	9.155	7.019	17.7
1572.31	504.1	443.3	110.8	80.8	521.3	439.6	49.5	515.2		40	156.906	281.5	230.6	139.9	410.188	89.4	159.094	284.625	1472.3	193.3	182.8	744.8	193	336.4	269.3	27.8	79.3	238.1														8.83865	8.24	4.883	9.766	8.24	14.648	6.104	17.395
168.688	245.3	2323.2	774.7	13.5	302.8	258.4	61.6	1571.4		161	126	630.9	161.1	42.3	136.188	69.9	62.5	376.562	70.8	183.2	263.9	145	1592.1	52.2	373.7	117.1	43.2	60.5														10.9677	6.409	6.409	6.714	5.798	13.733	6.409	40.283
234.906	82.1	70.1	1415	18.6	106.6	202.1	63.5	1770.6		955.602	525.688	267.1	767.8	295.6	222.688	93.9	61.7812	489.438	868.1	522.1	361.8	130.6	17.7	1174.8	157	47.5	85.9	76														11.1733	11.292	10.681	9.46	14.343	10.681	7.324	14.954
227	290.3	3238.3	1163.2	364.4	187.4	2017.4	347.6	1257.9		200.898	95.9062	608.5	282.7	126.2	5.8125	281.5	56.3125	65.1875	493.6	139.1	87.2	101	229	1044.9	925.9	91.6	70.1	68.5														33.3036	7.324	5.798	10.376	19.836	17.09	8.24	38.147
851.312	121.5	752.9	220	340.6	243.9	93.8	207.7	739		29.3984	849.5	244.7	134.6	44.5	408.312	447.4	216.094	155.375	49.4	444.2	26.5	111.4	36.1	652.8	340	0	23.1	18.8														17.3945	8.24	9.766	6.409	16.479	17.395	9.155	12.512
226.5	426.1	1223.9	759.4	84.9	96.4	1220.5	19.6	599.6		69.2031	425	413.8	15.6	67.6	111.375	100.5	313.219	499	354.4	924.1	479.6	150.6	109.8	521.1	56	778	245.7	30.9														13.3386	7.019	9.766	12.512	6.714	10.986	7.019	30.518
1006	638.4	1775.6	1320.1	7.6	51.3	674.1	115.8	1252.4		103.398	38.7188	169.4	93	103.3	221.625	255.8	98.7812	109.812	798.8	307.3	70	32.9	114.3	1450.4	18.1	344.8	196.8	11.9														11.4344	9.46	5.493	6.409	6.714	10.681	8.545	19.226
354.594	268	435.1	292.8	781.9	188.7	23.8	0.9	37.2		758.703	71.6875	484.7	21.4	25.6	233.125	116.1	119.594	601.312	424.2	1029.9	144.4	194.4	671.2	65.2	563.6	101.7	89	119.2														13.6234	18.005	4.883	15.259	18.005	14.648	6.104	23.804
86.1875	89.3	78.5	448.2	111.7	475	279.7	29.1	697		174.297	192.312	48.5	343.5	61.1	36.0625	15	185.812	21.875	492.1	199.7	89.1	58.4	945.2	781.1	245.1	257.1	87.7	44.3														8.77664	9.155	8.85	13.733	22.583	15.259	6.409	19.531
1088.62	201.6	671.8	168.5	29.9	24.2	894.2	93.5	1.3		319.297	220.875	150.6	600	162.1	169	214.4	824.594	516.625	1026.2	397.8	236.3	36.4	761.6	488.1	467.6	294.5	77.4	74.8														36.9117	16.479	4.272	14.648	20.447	11.292	6.714	22.888
299.875	1682.1	23.4	233.2	107.7	20.6	107.9	173.9	1413.7		212.602	112.5	70.7	204.3	118.7	31	112.9	0.40625	1038.5	1074.2	1497.2	105.6	299.1	382	198.9	92.2	42.8	34.7	36.5														14.5883	11.597	5.798	17.09	32.959	10.071	7.629	20.447
588	2002.8	87.6	743.7	743.5	42.1	1.5	16.3	309.2		627.805	517.406	373	426.1	431.6	318.125	110	107.188	366.875	1379.6	1185.6	191.3	131.9	33.3	530.7	410.3	367.4	22.3	15.5														40.1815	7.324	21.057	8.85	13.733	54.932	6.409	36.926
245.125	185.6	3060.5	252.1	46.6	63.1	399.4	195.8	90.1		62.8984	74.5938	190.6	114.4	41.2	305.5	322.5	196	245.125	379.5	265.5	299.4	105.4	19.9	1013.7	479.9	457.3	43.5	59.7														15.4507	10.376	6.104	7.324	15.259	11.292	7.935	26.245
807.375	0.5	71.7	160.4	583.2	193.9	1349	32.2	1138.8		103.602	33.8125	324	603.2	769.5	212.688	23.5	76.125	196.5	82.2	667.4	18.8	168.8	740.6	463.1	34.7	36.1	40.7	13.8														10.6324	9.46	5.798	12.817	16.479	15.564	8.24	19.226
904.5	1572	1867.4	43.4	172.2	1328.2	73.7	340.7	123.6		80.6953	252.781	222.5	129.3	204.4	180.812	138.2	463	575.375	477.9	681.1	72.8	164.3	206.2	877.6	1194.4	270.3	61.6	9.2														12.6588	6.714	16.785	20.142	22.278	30.823	6.714	37.842
443.312	257.5	63.8	1735.8	181.2	292.3	955.4	39.6	260.1		229.602	93.906	22.3	694.4	141.2	348	179.3	262.281	708.625	306.5	236.6	97.8	7.7	345.9	1870.8	18	208.2	68.7	147.9														35.8204	6.714	10.986	6.714	17.09	18.616	7.019	42.419
866.906	791.8	551.4	446.1	10.2	257.6	151.4	248.9	238.3		295.297	130.188	976.1	16.2	204.2	17.1875	61.3	82.3125	829.188	1645.7	243.7	371.3	890.2	437	110.9	242.5	362.7	5.7	21.8														13.3293	6.714	5.798	16.479	14.648	16.174	8.85	12.512
93.0938	564.4	3153.9	1992.2	113.8	146.5	636.6	126.4	38.5		181.102	331.312	420	514.8	82.3	153.688	76.5	106.906	580.812	563.7	896.1	77.2	943.4	667.4	163.3	173.8	488.9	57.8	51.1														16.1838	8.24	14.954	20.752	9.46	29.297	6.104	19.226
1937.09	106.7	901.9	2113.6	65.2	330.7	553	199.7	249.9		169.898	42	61.6	171.8	30.2	228.5	91.5	250.688	236.312	83.3	175.2	32.1	73.7	265.9	764.3	966.8	202.8	39.8	42.9														13.3956	8.24	6.714	7.019	16.479	20.142	6.409	21.667
0.59375	1477.7	908.1	970.1	111.4	96.8	680.7	173.4	2710.5		120.102	43.1875	637.7	337	288.9	68.75	236	79.5	300.5	24	1491.6	192.4	58.9	309.8	1492	55.7	160.5	11.6	26.3														13.7999	7.324	4.272	12.512	14.648	12.207	7.324	11.597
959.719	79.9	746.9	182.8	287.5	511	789.9	144.8	703.9		106.398	278.625	64.7	257	62.5	152.188	400.3	192.812	505.375	975.8	1484.2	55.1	146.6	1136.5	240.3	446.6	523.4	131.3	53.6														15.4604	17.395	4.272	12.817	9.766	12.512	7.629	19.531
931.5	23.6	77.8	565.1	137.8	45.5	338.6	67.3	3110.8		107.703	41.2815	81.7	157.7	131.8	71.1875	24.7	32.6875	279.312	231	567.3	46.5	214.7	374.5	100	474.8	61.3	99.7	173.1														14.0525	7.935	7.935	20.752	28.992	10.986	11.292	19.226
339.688	718.6	2087.8	380.3	197.2	114.5	919.3	90.5	2194.6		1076.1	276.094	15.5	83.9	134.7	843.312	256.9	178.188	299.875	430	863.6	28.8	270.5	769.7	380.8	86.7	69.2	17.1	87.4														16.4708	11.292	12.817	13.733	37.842	12.512	6.104	15.869
586.812	641.9	557.3	757.5	266.5	159.5	945.7	158.4	957.5		266	446.719	936.1	220.3	66.4	363	553.6	366.125	334.812	1135	450.6	36.1	63	13.2	247.1	671.4	445.6	70.3	59.5														17.264	10.071	8.24	10.986	12.817	10.681	6.409	12.207
587.188	74.8	2068.7	328.2	321	365.4	83.4	89.4	14.1		90.6953	0.40625	707.5	83.2	29.4	35.375	400.6	75.2812	39	721.4	337.6	310.7	306	382.4	627.1	28.2	23.6	30.4	64.1														21.4698	7.019	8.24	6.409	18.311	12.207	8.545	54.626
838.312	190.7	1246	662.9	90.7	74.7	248.8	236.9	448.4		185.805	355.594	1042	622.8	299.6	196.125	56.2	52.3125	500.312	107.6	1424.5	359.1	395.8	456.4	307.7	58	225.4	96.1	13.9														23.8009	11.597	36.926	15.259	40.283	9.766	9.155	34.79
299.875	59.6	102.3	2281.9	94	81.1	2.1	55.1	0.4		78.5	43	596.2	470.8	227.2	366.188	368.5	144.281	518.688	500.6	263	266.2	423.9	32.1	440.6	171.1	127.5	13.5	14.4														46.7677	8.24	4.272	18.311	7.324	13.428	6.409	21.667
334.5	1174.7	916	2453.3	60	261.6	232.4	32.5	1337.1		339.898	640.688	715.3	839.7	39.5	306	95.3	68.7188	349.812	252.7	1236.9	242.3	17.3	106.4	1064.1	281.6	619.6	74.2	63.3														9.48775	8.545	6.409	11.597	15.869	12.817	6.104	45.471
504.406	76.6	3726	499.6	47.8	672	610.2	152	1172.9		200.602	179.594	36.1	801.7	70.8	216	181.7	789.781	73.1875	3113.3	1895.5	154.9	127.3	277.3	521.2	1157.6	437.6	56	229.5														21.9575	10.376	5.188	9.155	12.207	13.733	6.714	36.621
432	323.9	1115.1	1791	142.6	0	542.6	71.3	1789.5		66.5	48.7188	25.4	216.7	1518.2	625.312	206.8	394	806.625	970.6	417.4	86.6	557.7	218.8	359.3	15.9	89.2	173.5	207.9														10.1483	14.954	6.104	16.785	8.85	13.733	6.409	32.654
919.093	532.2	373.4	851.4	164.1	32.1	1037.2	99.4	637.2		656	46.9062	43.7	33.7	205.9	20.0625	455.3	116.812	354.312	518.8	141.1	100.5	262.7	238.5	96.6	158	249.7	16.8	39.8														11.9352	7.324	8.85	8.85	16.479	12.512	7.935	42.725
80.7188	596.1	3184.5	173.5	233.8	0	349.5	242.7	830.8		34.7969	129.875	343.8	84	35.8	62.8125	95	154.812	162	1412.3	705	241.5	117.7	97.1	865.5	422.5	582.2	31.1	6.5														20.8115	8.24	4.272	8.545	31.128	12.512	6.714	13.123
393.406	734.8	1792.5	256.4	23.8	88	131.8	32.5	1.4		693	751.719	138.7	212.9	141.8	486.938	562.5	44.7812	281.375	422.7	280.9	181.2	112.9	80.9	135.9	1212.9	772.8	41.1	109.5														11.303	7.935	4.272	5.493	16.785	11.292	6.714	25.33
1178.09	316	4890	277.7	75.8	0	773.2	35.2	704.5		149.305	512.406	932.7	1208.8	164.2	183.688	64.6	115	500	630.6	156.7	136	240.5	221.8	802	345.7	80.6	54	72.3														38.2287	6.104	7.019	8.24	8.85	11.292	6.104	31.128
111.781	435.9	40.3	1233.9	89.2	70.9	111.5	87.6	1909.3		1034.09	47.1875	121.8	433	75.6	179.375	37.2	85.4062	40.5	81	48.1	38.6	323.9	234.1	213.8	403.5	314.4	56.4	44.1														32.6091	9.46	7.324	7.324	34.485	17.7	6.714	14.343
1173.91	880.3	1095	56.3	55.1	0	1103.8	42.4	273.6		45.4062	60.8125	108.5	183.8	123.5	47	446.4	210.312	522.312	248.8	9.8	149.7	481	58.3	177.7	323.3	463.1	12.2	66.4														8.38856	10.071	4.883	12.512	39.978	17.7	6.409	17.09
35	318.9	1046.3	1140.2	230.8	97.2	24.7	176.9	0.4		35.1953	156.188	49.3	1100.9	197	17.125	263.6	84.875	112.812	1921.2	790.4	202.3	93.9	672.5	191.7	653.9	222.6	462.3	45.2														10.0601	9.766	4.272	7.324	20.447	11.292	8.85	25.024
2996.81	3737	182.2	239.4	47.2	75.4	540	77.4	645.6		277	855.688	29.3	564.1	380.6	37.3125	313.7	12.8125	90.75	14.6	1042.2	534.9	57.1	141.8	438.3	106.2	41.7	116.2	36.1														20.185	7.324	5.188	6.104	25.94	12.817	12.512	38.452
373.094	393.9	309.5	2999.3	52.2	19.4	109.7	29.2	1012.3		326.398	490	455	142.1	136.4	244.062	386.2	273.188	136.812	387.8	1287.2	51.7	217.9	22.7	942.1	460.9	557.5	32.9	24.5														9.7254	12.817	5.188	8.85	9.46	14.648	6.104	17.395
560.906	602.6	1402.7	995	147.8	85.9	251.9	20.7	151.9		91.6016	77.7188	63.8	29	57.9	171.688	357	128.906	500.938	266.8	1032.4	466.8	649	358.4	159.5	854.6	312.7	96.9	213.1														84.2865	7.019	5.493	7.935	13.733	10.071	7.324	38.147
2262.91	4301.9	2533.3	122.5	95.6	45.4	520.8	60.2	560.9		418.898	288.188	232.9	144.2	515.7	38.25	53.8	50.0938	1016.69	937.2	6.5	0.3	20.7	177.4	1184.5	168.1	1266.3	139.3	102.7														12.1271	6.714	7.935	23.499	17.395	10.681	8.24	28.687
365.688	118.6	83.1	462.4	107.3	50.9	359.3	91.8	194		135.305	503.312	461.8	270.7	10.8	563.25	235.1	49.4062	669.5	95.5	550.9	14.4	184.7	14.4	43.9	600.9	348.8	362.6	7.4														11.7434	6.714	6.104	14.343	10.986	9.155	6.714	30.212
273.188	1068.9	560.6	215.7	9.9	117.8	451.3	76	404.5		186.297	99.5	51	223.5	153.6	693.625	45.9	269	559.875	307.5	895.9	267.2	229.9	585.7	236.6	133.4	263.4	71.8	65.4														11.7621	9.155	5.493	7.935	13.733	12.207	7.629	25.635
1109.12	536.2	1526.7	165.4	21.7	104.6	783.1	14.2	1565.2		469.805	584.781	786.5	195.9	79.8	142.812	48.3	266.406	78.3125	987.8	233.5	230.5	19.4	369.1	848.7	314.6	76.3	37	27.4														66.1157	6.409	5.493	6.104	23.499	12.207	6.104	11.597
427.875	1327.1	861.8	1504.9	58.5	11.3	1221.1	78.1	733.2		355.797	237.407	358.5	209.5	51.7	21.3125	700.7	54.4062	1308.31	370.3	1352.8	243.5	188	379.4	343.1	22.4	276.1	75.4	64.7														17.7325	7.629	5.493	18.616	14.038	14.954	7.324	14.954
1430	1207.1	96.7	521.8	75.5	412.4	349.3	10.7	685.9		60.1016	722	185.6	325.1	311	193.188	73.9	218.094	1769.19	580.6	26.3	414.1	487.8	48.2	600.2	38.5	224.3	11.5	225.2														26.6806	21.667	5.188	11.292	13.428	24.109	6.409	17.395
757.125	444.7	1753.8	1124.3	389	128.3	215.2	138.8	637.6		794.195	233.5	391.7	630.5	25.1	608.062	244.3	361.406	384.188	882.7	1518.9	103.6	180.4	344.1	34.4	227.6	380.2	96.4	22.9														19.9093	8.545	9.46	5.798	19.836	19.226	7.324	54.626
376.781	915.5	269.9	1528.1	194.8	121.1	33.2	201	353.7		122.602	314.719	330.5	292.1	361.7	728.25	33.8	15.1875	29.625	656.9	848.7	148.3	14.9	463.6	229.6	949.1	413.2	50.4	9.6														16.7889	7.324	4.578	13.428	10.681	11.292	8.85	24.109
147.312	2752.3	592.2	1258.1	63.6	391.5	51.5	55	1314.7		301.898	87	215	569.5	49.9	371.375	631.6	73	583.25	768.9	602.6	87.8	343.2	248.7	183.5	341.9	209	242.9	32.4														15.2145	7.629	6.104	12.817	14.954	21.973	10.376	22.888
502.781	2956.5	453.7	513.5	71.9	55.2	189.7	53.4	1133.3		668.805	353.781	143.3	617.1	28.1	242.875	328.6	177	975.812	145.1	586.9	145.1	545.1	52.2	118.6	312.9	236.2	69.3	50.4														18.0194	12.207	4.578	9.155	15.869	12.207	6.104	35.706
551.625	795.2	2154.2	2356	23.4	403.6	618.6	90.1	1202		126.602	419.094	214.3	281.5	139.8	461.625	844.6	110.094	387.625	1470.1	549.8	197.1	433.8	67.1	87.9	1102.1	79.1	21.6	63.1														31.4511	18.921	5.493	7.324	10.071	15.869	8.24	30.518
1435.28	1325.8		670.8	69.2	266.6	615.7	105	44.3		114.898	69.625	327.1	1231.9	194.3	385.625	120.8	65	161.5	810.7	126.4	190.3	125.3	79.5	531	112.9	9.8	116.3	91.1														16.397	8.24		13.733	52.185	27.466	6.104	16.785
356.594	597.9		229.6	201	119.3	99.8	96.9	786.5		156.102	192.594	897.6	737.9	12.7	47.375	398.3	101.125	1665.06	354.6	557.8	266.8	495.2	1808.9	372.1	265.9	108.9	115.8	6.7														15.2811	7.324		14.954	13.733	11.902	9.766	34.79
685.5	70		2664.2	110.9	81.9	753.6	50.4	269		525.695	484.781	303.3	757	425.6	26.1875	30	56.2812	1161.62	179.8	1228.4	444.1	166.9	326.2	285.8	538.5	389.7	96.4	68.2														11.5086	10.681		14.954	9.155	15.564	9.46	14.343
3254.91	125.9		657.8	41.5	577.5	461.3	112.8	295.8		71.2031	157.125	288.5	473	120.6	259.938	285.8	44.4062	1401.5	249.4	638	99.5	88	9.3	428.9	1179.2	46.3	179.9	29.5														16.4892	7.629		7.629	6.104	14.343	7.019	18.005
264.219	95.5		1148.2	68.1	218.8	387.3	92.4	2.1		425.102	595.688	139.2	320.4	207.3	371.062	328	72.5	1109.12	996.1	386.1	39.3	320.9	319.9	283	61.6	196.1	72	33.6														40.4604	8.85		18.005	11.597	8.85	6.409	20.447
1125.69	894		60.3	113.1	29.1	692.8	76.3	1176.1		83.3984	103.906	453.4	241.5	23.4	200.5	56	151.906	61.0625	1558.1	415.3	233.6	221	229.1	140.6	41	238.2	82.5	122.6														9.74025	19.531		6.104	8.545	10.986	7.935	46.692
975.906	389.3		423.6	137.5	35.8	932	151.7	14.2		135.398	789.781	130.8	328.2	66.1	47.625	71	121.094	247.938	154.7	1388	92.2	206.2	609.4	616.2	2214.8	34.7	71.7	27.2														13.3356	7.019		9.155	12.207	17.395	7.019	29.907
581.781	1684.8		623.5	62.3	577.2	1024.7	229	83.2		480.797	161.625	796.8	253.1	47.2	87.375	83.9	83.0938	1519.06	851.5	371.6	125.4	63.8	71.8	546.8	570.3	150.7	210.3	36.7														13.1768	7.019		15.259	7.324	10.376	8.24	24.719
1295.91	53.1		713.1	152.6	146	246.4	10.2	44.9		284.906	645.594	444.7	404.1	122.5	27.1875	393.2	47.7188	35	148.1	954.2	43.8	238.4	140.7	839.1	675.1	82.7	35.7	174.1														15.1125	7.324		22.583	11.902	10.071	9.155	22.583
347.094	1190.3		766.4	279.4	192.7	54.4	41.3	307		527.094	172.281	590.3	27.7	50.5	128.125	143.4	264.688	842.938	24.5	704.3	45.6	37.6	108.6	81.5	1183.7	81.7	55.7	32.9														17.1011	10.071		16.479	18.005	11.902	7.629	36.316
1249.91	746.8		31	81.9	148.1	175.6	48	70.9		282.703	479.312	280.1	61.3	126	510.688	514	360.188	438	23.2	2011.5	222.8	286	671.7	29	202.5	163.3	66.9	47.9														30.3016	7.324		16.785	7.019	18.005	7.019	16.785
459.312	4322.3		3077.4	107.8	234.9	522.4	12.4	1441.1		182.602	1721.5	395.2	579.1	95.3	33.4375	541.3	119.219	226.188	868.7	432.7	265.8	124.9	699	90.1	1814.1	133.9	3.1	54.1														27.5087	7.019		6.104	10.986	10.681	7.629	33.875
460.781	1266.8		248.4	38.7	420.2	376.2	42.9	168.1		61.1016	89.9062	1359.8	62.5	281.3	26.6875	63.9	8.28125	621.188	231.5	74.6	327.6	168.2	12.8	214.2	131.4	234.3	63.6	82.3														9.60338	10.376		7.324	5.493	18.616	6.714	19.836
1251.81	1569.2		4363.4	45.4	78.6	273.6	107	188.5		48.0938	535.406	71.8	41.7	80.4	64.375	230.5	176.125	97.8125	911.1	42.9	427.7	448.5	482.7	286.7	36	474.9	118.1	80.2														17.7718	6.714		14.343	11.292	12.817	6.104	33.264
322.188	1615.7		406.3	71.7	158.8	734.8	288.7	203.6		244.406	240.094	140.8	292.5	92.6	137.812	805	382.094	721.188	25.2	204.9	78.9	242.1	158.8	376.1	41.9	470.6	285.6	291.8														13.6936	8.24		7.019	9.46	10.986	6.409	22.583
338.5	477.9		197.7	19.2	355.7	1220.3	309.2	660.2		1015.4	452.094	94.5	206.2	169.2	15.1875	140	51.0938	718.812	243.7	1977.5	0	314.4	408.2	43.6	211.5	127.1	36.5	133.4														10.2855	24.719		5.798	9.766	11.292	8.85	36.011
107.906	1357.9		125.1	77.8	41.8	1088	95.3	234.5		73.7969	149.094	55.8	601.1	68.4	106	238.3	42.9062	239.812	694.1	378.6	72.5	149.4	448.3	115.4	343.4	184.5	132.8	73.2														33.4282	10.071		10.376	9.46	12.512	7.935	57.068
2335.09	98.4		344	53.2	455.5	149.8	62.8	70.5		287.703	741.094	372.4	101.4	179.6	72.125	259.2	93.0938	133.375	66.2	915.2	146.2	162.2	212.9	324.5	364.7	122.4	93.9	221.1														75.4857	6.714		18.616	11.292	11.597	6.714	26.245
238.625	2604.5		97.8	45.1	148.8	383.5	94.7	435.2		554.898	318	172.5	1122.5	21.9	129.688	217.2	189	1012.19	1119	729.4	367.5	185.4	55.4	79.3	307.9	30.2	370.2	45.2														13.6604	6.714		10.376	30.212	10.986	9.155	33.264
127.5	507.3		680.4	476.3	594.8	430.5	93.3	539.3		0.398438	82.625	82.7	354.4	161	50.1875	143.7	72.1875	215.438	507.4	762.5	120.4	153.7	337.1	148.8	906.5	9.4	16.7	5.4														26.7343	7.019		8.24	6.104	12.512	7.935	23.499
200.188	36.2		551.2	339.2	301.8	15	190.2	925.6		732.703	204.5	1017.2	220.9	67.9	30	145.8	67.7188	285.562	170	240.3	29.3	438.2	259.8	141.9	382.1	347.6	11.1	74.5														23.9884	6.104		15.259	16.174	9.46	8.24	36.011
2481.81	18.5		1869.2	24.7	272.8	11.9	140.3	3127.1		91.5	186.781	195.8	2408	110.5	437.625	338.9	147.688	590.625	603.2	218.5	227.6	46.9	238.8	131.7	34.5	105.5	209.2	12.1														46.254	8.545		19.531	14.648	12.817	9.46	10.681
601.094	725.2		877.7	146.1	220	705.3	63.3	1846		538.797	423.406	556.1	92.5	96.9	414.062	143.4	33.0938	1385.69	272	136	88.9	169.7	336.7	64.1	356	109.2	168.9	28.1														17.7634	9.155		15.869	11.902	11.597	6.714	25.635
203.094	180.9		285.4	653.2	950.4	313.9	14.1	1247		153.602	172	103.5	610	128.8	221.438	206.1	40.9062	75.125	3199.3	459.8	43.1	71.4	43.5	527.2	649.4	119.4	295	34.4														8.86358	6.714		5.798	18.921	18.616	6.409	30.823
403	586.7		342	55.3	381.4	599.5	11.4	648.8		508.102	1024.41	152.7	166.9	42.6	167.312	93.1	323.5	121.062	56.8	364.5	80.8	191.5	79.1	82.4	1.3	88	75.5	52.8														60.386	8.545		7.324	13.123	10.071	7.019	49.133
114.688	573.8		168.5	92.9	41.2	1029.8	167.3	819.4		90.5	47.5	451.1	719.2	96.2	34.875	272.6	130.812	732.5	406.4	241.3	11.6	200.9	127.8	319.8	71.2	84.3	32.1	35.1														14.8995	8.85		8.24	11.597	17.09	6.409	22.278
753	1248.7		2332	312.5	237.5	1181	111.1	153.3		168.695	504.906	605.7	806.1	107.4	153.875	467.9	64.9062	190.312	338.5	570.6	108.7	706.9	460.9	576	168.8	590.7	8.4	41.1														9.60524	7.629		16.174	11.597	13.123	11.902	52.185
561.125	260.4		48.6	15.8	64.4	467.7	37.8	184.5		544.5	56	28.3	193.2	76.8	47.25	823.5	75.5	827.312	18.6	521.1	212.8	174.7	449.6	543.4	201.8	154.9	35.5	41.4														15.4317	6.409		6.409	17.09	18.921	6.714	19.836
256.688	803.5		2861.5	141.5	77	367	78.9	58.4		452.805	76.7812	304.1	84.3	43.8	39.375	518.1	0.78125	941.688	442.6	1320.8	474.9	310.8	689.3	186.3	220.4	402.2	107.6	149.8														14.0667	7.019		5.493	13.733	23.499	6.104	26.55
754.312	296.8		1239.6	570.8	23.8	220.3	136.1	923.5		72.8984	95.5	78.4	107.5	57.9	106.875	280.7	63.9062	406.5	313.5	317.2	491.8	232.9	128.3	118	594.5	69.6	101	64														15.7986	6.409		11.292	14.343	16.785	8.545	30.212
435.5	96.5		1444.9	748.2	1099.7	542.1	53.6	536.1		594.5	321.5	2133.4	140.8	242.4	33.3125	222.1	449.906	878.812	279.8	275.7	263.4	138.2	47.7	35.6	53	155.7	14.4	49														40.0201	9.766		16.174	7.935	8.24	6.409	26.55
178.688	984.1		490.9	188.9	33.3	19.9	34	228.1		275.297	240.406	32.3	157	171.5	301.438	58.5	66.9062	1631.81	206.5	122.6	112.2	535.3	131.9	69	99.7	18.5	13.9	13.4														13.9477	8.85		12.207	5.493	21.973	6.714	30.518
117.094	1039.4		40.5	178	632	59.5	34.8	1704.7		145.602	159.594	437.4	637.3	65.5	275.75	624.8	66.7812	139.75	152.5	89.6	117.3	78.9	684.9	40.7	93.2	114.8	101.5	21														75.5945	7.629		12.512	21.057	13.733	7.935	12.817
575	101.7		501.5	571.1	177.5	65.6	201.8	1335.8		163.805	145.219	1006.5	1372.4	225	67.4375	13.7	263.406	46.3125	416.5	55.5	29.1	439.3	557	351.3	164.2	59.1	45.6	38.6														7.86614	10.986		16.479	14.954	23.193	6.104	25.94
303.719	1238.4		560.1	388.5	578.9	1235.5	107.7	438.5		208.695	252	506	354.1	49.7	21.3125	36.1	79	307.625	201.6	15.5	110.5	705.8	46.4	45.8	398.9	87.9	161.7	87.4														16.8125	7.935		8.545	11.597	34.79	7.019	11.292
305.688	2345.2		192.8	139.7	458.6	210.5	41.2	697.9		236.602	51.6875	506.2	302.8	63.9	398.375	200.6	312.906	52.375	234.9	292.7	54.8	411.7	531.2	531.4	412.3	148.2	186.8	29.6														11.9386	9.155		9.766	13.428	14.038	6.104	29.602
763.5	326.9		317.6	145.9	203.4	1274.8	24.6	494.4		114	809.188	302.2	1356.4	223.5	129.312	200.7	143.094	433.625	451	135.2	80.5	15.4	514	621.1	47.8	261	154.3	20.7														8.43441	8.85		7.019	10.071	14.343	7.324	10.986
99.5938	112.8		1319.1	419.7	919.4	892.9	48.5	508.1		968	810.219	86.5	41.5	18.9	88.375	702.1	153.312	806.812	372.5	268	201.6	338	249.9	454.7	7.9	211.9	272.2	48.3														9.61685	7.935		14.954	8.545	13.733	6.714	21.362
1011.09	71		1955.7	63	40.8	472.1	11.6	796.9		134.898	239.5	313.8	272.8	214.6	266.938	46.4	269.094	66.875	1104.7	568.5	118.8	133.8	244.2	255.5	442.8	35.2	325.1	82.4														18.4562	10.986		14.038	16.479	16.785	8.24	15.869
1525.81	2286.4		705.2	577.1	337.1	228.7	68.1	2241		171.5	348.406	198.4	31.3	160	74.0625	802.2	51	1135.38	412.5	527.3	64.1	95.8	617.8	42.6	285.7	88.8	7.6	90.1														8.97925	8.85		15.564	12.817	19.836	7.324	15.564
760.406	484.1		3161	246.5	614.9	491.5	24.3	634.3		162.102	307.781	204.9	727.3	51.9	1061.81	1225.4	49.7812	396.938	281.2	587.3	706	405.7	50.7	579.9	288.7	27.5	226.3	8.5														14.1755	14.343		16.174	27.466	24.109	7.935	15.869
966.688	869		117.9	196.2	666.2	50.7	75.8	268.2		408.102	292.094	525.1	767.7	250.6	64.6875	384.2	0.21875	65.8125	90	490.5	92.2	89.7	99.3	810.3	541.2	659.8	5.8	48.6														57.858	10.681		12.207	18.311	18.005	7.324	41.809
282.406	1239.9		1373.8	308.9	774.8	588.8	24.6	2859.3		341.297	322.219	319.8	63.3	59.1	708.188	956.2	0.28125	1807.56	197.2	1465.1	66.8	83.8	179.4	646.4	190.8	107.5	195.5	431.5														9.96329	10.071		17.7	7.019	10.681	9.155	10.681
2946.41	214.1		483.2	1247.5	271.2	1003	68.1	1439.1		393.602	248.094	16	39.3	210.1	15.4375	107.2	33.2188	646	205.3	460.3	25.3	706.5	81.6	243.6	322.1	162.1	72.2	44.2														19.444	7.019		6.409	25.635	18.311	6.409	11.597
72.2812	1036.7		417	237.7	373.9	33.6	122.2	1341.7		294.102	1210.41	61.2	555.3	194.3	115.188	68.8	1.28125	445.438	1441.9	43.3	116.5	585	311.7	310.4	570.6	92.6	193.8	36.7														21.3537	9.155		7.324	9.155	13.123	7.019	28.076
488.219	52		119.7	63.8	210.8	95.9	20.3	1585.2		355.398	105.781	1063.8	645.6	180.3	293.5	183.9	83.625	351.5	624.1	66.6	153.7	290.5	17.9	111	191.4	132.3	191.6	147.5														11.2781	6.104		14.954	22.278	12.817	7.629	24.719
274.188	785.9		411.8	85.3	61	1487.7	97.3	104.4		284.398	177.312	279.6	77.3	256.1	87.8125	407.8	54.2812	172.25	33.9	92.4	527.6	44.4	110.5	363.4	345.2	586.5	37.9	141.9														10.7775	10.986		15.259	12.512	20.447	8.24	16.479
85.8125	298.2		1842.5	194	169.8	371	11.2	2390.5		241.5	322.688	176.5	542.3	30.4	98.0625	108.2	354	147	56.4	246.5	40.3	468.4	19.6	391.6	325.5	746	83.2	18.1														10.5496	10.681		7.935	9.155	17.395	7.019	22.583
1653.09	467.9		411.4	22.6	441	1940.5	42.5	914.1		369.398	920.906	701.4	657.6	93.1	20.4375	49	299.719	461.812	141.3	553.6	15.7	490.1	160	13	106.8	57.7	118.3	113.7														11.8302	9.766		5.798	25.94	18.921	6.714	21.667
1638.59	248.7		209.6	142.6	463.1	1327.9	100.9	288.6		293.406	92	129.4	583.7	381.6	143.188	88.6	215.375	346.5	1017.4	452.8	189.3	197	725.5	29	576.9	23.9	80.8	7.9														29.0517	10.376		16.785	15.869	12.512	7.019	23.499
546.812	589		359.9	48.6	50.5	81.3	20.1	91.8		327.695	48.8125	57.5	333.9	144.6	367.625	61.2	215.125	670.188	114.8	292.4	459.6	373.1	86.7	154.8	28.5	153.6	43.7	22.5														125.793	34.18		7.935	6.714	11.902	10.681	33.569
172.688	1807.2		433	13.3	420.2	95.5	95	282.3		192.602	131.094	13.9	270.6	100.7	158.875	72.5	161.688	75.4375	108.7	408.2	78.2	48.6	77.8	13.1	32.2	595.6	249.7	134.2														11.9012	7.629		14.954	29.602	7.324	6.714	20.752
957.594	135.2		2096.3	383.6	52.3	261.3	46.2	252.5		0.398438	210.406	595.9	869.2	40.2	326.312	268.5	64.6875	1564.5	75	2071.7	185.1	853.4	366.2	39.5	115	414.2	25.4	82.2														13.0227	10.376		8.545	22.278	11.292	6.714	29.297
1498.59	2613.1		580.6	66.4	547.3	202.3	34.3	428.6		119.305	603.094	383.8	129.5	14.6	52.3125	397.3	115.719	937.188	98.4	722.2	194.9	148.1	828.4	19.5	242.8	47.9	18.1	13.6														7.91045	9.46		11.597	35.4	15.564	7.629	23.193
183.219	300.8		302	53	132.4	0.9	54.4	735		858.195	431.812	67.9	160.6	106.2	36.0625	102.9	165.812	243.5	222.7	206.6	223.3	193.4	65.3	28.4	502.3	72.7	166.5	23.9														20.2053	8.24		15.869	6.714	14.038	6.409	28.076
847.594	1263.2		688.9	333.8	682.6	2600.4	9.1	166.7		163.805	220.781	52.4	104.1	102.4	502	470.8	42.6875	296.875	840.8	254.7	301.7	120.9	37	75.4	433.8	22.5	262.8	30														24.9171	7.629		11.597	7.324	8.85	6.409	15.259
660.406	361.2		7.2	108.5	529.8	196.5	62.3	902.7		32.5	21	236.8	73.9	179.9	398.312	28.6	75.6875	233.75	32.1	11.2	118.9	256.2	162.9	33.9	597	651	115.8	36														14.8702	8.24		8.85	16.785	32.959	8.85	12.207
1010.5	726		1066.9	412	781.6	1341.4	0.9	1481.4		1243.5	299.812	230.8	206.3	49.6	245.688	548.7	102.906	103.75	586.3	343.9	167.9	28.7	828	46.9	261.1	287.7	17.4	46.5														18.2032	11.902		14.954	19.531	8.545	7.324	18.005
1641.59	261.8		212.3	28.5	211.7	248.8	71.1	360.7		101.695	99.1875	526	47.6	78.6	120.625	104.2	50.7185	180.938	232.9	376.6	433.9	362.7	97.1	131.9	466.5	42.4	204.9	166.9														10.9397	12.207		7.935	8.85	14.038	6.104	23.499
409	513.9		1013.8	74.1	31.2	208.1	45.4	573.2		174.203	461.906	204.1	30.4	216.4	74.1875	209.6	240.875	90.8125	754.7	82.7	47.7	88.8	246.3	108.1	479.5	31.3	50.5	37.9														10.7309	9.155		10.681	22.278	9.155	7.629	12.207
395.812	124.1		1641.8	250.4	30	953.3	14.8	581.8		231.898	813.188	853	40	158.2	137	280.8	148	280.75	23.8	102.7	122.9	162.6	93.7	40.6	288.9	132	107.7	41														26.4671	10.071		7.935	7.629	11.292	6.409	27.466
773.781	2918.2		247.5	260.5	38.6	1812.7	204.7	360.5		137.797	908.312	395.9	305.2	163.9	15.1875	373.9	29.125	152.125	130.5	873.4	133.3	342.9	248.3	93.1	103.4	80.4	76.6	23.4														11.7702	8.24		7.019	21.973	12.817	6.409	26.55
1103.41	1384.8		689.2	69.1	548.6	279.7	44.1	767.4		409.805	802.312	292.1	96.6	92.7	196.312	384.3	160.375	599.312	624.2	318.7	21.5	624.3	1077.9	27.8	305.2	203.5	13.6	155.7														14.5453	9.46		11.902	11.902	21.667	6.409	45.471
1126.09	1480.3		135.3	233.4	42.4	1522.8	35.9	777.5		545.797	374.594	55.5	424.2	358.5	147.625	37.7	157	330.688	210.3	479	132	92.8	602.4	37	425.2	679.9	171.8	29.4														20.088	9.46		10.986	17.09	50.049	7.935	26.855
34.2188	914.9		798.5	23.7	783.3	863.2	30.5	19.5		312.398	189.094	95	739.3	189.9	107.25	168.6	115.125	961	31.6	197.7	73.5	467.6	367.8	13.2	187.2	296.6	34.4	88.2														48.979	7.629		15.564	10.986	19.531	7.324	14.954
1015.88	1101.4		62	351.4	140.2	1032.4	147.8	1450.8		75.7031	66.6875	124.6	687.3	58.4	134.25	676.5	110.875	449.812	157.7	539	158.4	115.5	139.5	16.9	0.6	347	16	81.6														15.3227	8.85		7.324	6.714	9.46	6.104	16.785
507.906	1369.9		205.6	395.7	375.6	2609.5	28.3	1806.4		187	125.5	125.9	66.3	89.7	285.25	180.1	32.5	447.688	150.5	402.4	79.4	822.6	399.9	11.2	72.6	72.8	72.9	41.8														21.3065	17.395		13.428	27.161	12.817	6.409	21.362
595.312	399.7		307.2	25.7	575.4	431.8	98.2	1138		190.102	376.125	328.1	334.9	209.3	342	37	110.719	727.688	116.8	97	93.3	569.4	437.1	20.5	178.1	377.1	85.5	94.5														13.0972	11.902		5.493	10.986	10.071	6.104	27.161
254.688	2128.7		912	56	340.4	589.2	69.3	2392.8		78.6953	617.875	1316	438.4	135.3	57.625	90.6	115.688	1160.44	1342.8	356.2	45	89.3	18.3	12.2	56	635.7	224.3	222.1														8.93293	8.24		6.409	7.629	28.076	10.071	19.836
37.0938	693.4		981.1	70.9	55.8	472.4	40.2	575.3		449.602	884.906	1247.4	98.9	19.8	33.8125	913.3	305	458.75	378.1	321.7	122.3	246.4	757.6	37.1	183.7	143.4	44.3	46.4														38.4271	8.545		6.409	15.259	17.395	7.324	11.902
387.125	2221.6		300.6	149.5	350.8	58	2.9	595.6		59.2031	474.094	440.6	945.3	157.5	115.5	18.7	172.312	483.125	507.6	132.6	64.6	73.7	58.8	63	26.3	112.3	95.6	35														9.68014	9.46		17.395	7.019	31.128	6.104	40.894
56.6875	3900.2		1050.5	78	1193.9	307.5	70.9	1109.8		309.398	159.625	460.8	313.1	72.9	493.875	108.7	160.094	1370.69	243.4	2324.6	118.5	18.1	393.8	627.2	493.4	42.9	79.5	13.2														21.3232	6.104		6.409	10.681	16.174	8.24	30.212
77.1875	659.3		187.6	97.6	342.8	580.8	25.7	1347.6		93.8984	88.5938	29	249.6	79.7	214.312	440.9	108	284.812	919	33.7	199.9	573.3	52.3	351.4	466.8	281.2	24.9	88.6														39.0158	8.545		11.902	12.207	32.349	9.155	19.836
953.406	87.2		101.8	67.5	682.5	253.5	169.7	135.3		234.703	151.281	0.6	346.6	390.7	11.6875	77.9	251.094	50.5	221.3	391.7	81.5	181.2	170.9	132.7	978.6	33.5	84.7	158.3														13.6432	6.714		14.038	16.174	18.921	8.24	10.986
688.594	237.9		391.5	217.6	98.7	255.9	90	826		55.1953	233.219	681.1	2577.7	35.4	201.438	340.7	50.2185	1312.62	75.9	117.8	208.8	575.4	169.6	630.6	355.2	165.3	112.1	241.1														10.4283	11.597		6.714	13.733	10.071	7.629	21.667
326.406	1686.2		4245.1	238.4	83.4	413.3	2	1533		98.8047	371.906	142.4	74.4	48.8	51	797.6	135.781	182.688	153.7	130.7	324.5	328.3	1771	303.5	175.6	226	20.6	137.9														13.1302	7.324		21.667	13.123	22.278	9.155	32.654
37.2188	381.2		205.7	89.5	82.2	2174.9	81.3	567.9		378	96.0938	211.1	1871.2	310.2	99.75	121.9	78.3123	840.188	1037.3	1218.7	14.5	107.5	302.4	39.9	512.7	297.4	149.4	57														8.46573	8.545		6.104	11.597	17.395	7.935	13.428
1354.59	78.9		678.8	47.6	38.6	963.8	8.8	2546.7		77.2969	57.7812	985.2	309.8	79.7	141.5	122.8	72.9062	514.625	479	46.8	137.9	159.6	889.3	193.9	83.2	17.1	115.5	9.6														17.2107	9.155		13.733	30.518	28.381	6.409	28.687
1568.41	1273.2		2009.2	89.1	283.9	334.8	21.5	453.1		83.8047	1004.41	338.7	30.6	108.1	386.438	114.4	60.2815	490	213.9	215.4	353.7	62.8	228	220.4	253.8	264.2	230.7	70.5														13.9484	8.545		13.123	14.954	21.973	7.019	26.55
1156.69	397.1		160.3	66.2	1364	315.8	13.8	47.7		252.398	218.719	211	596	20.1	12.3125	36.1	19.8123	468.875	104.6	156	318.2	345.9	815.8	12.1	550.5	460.4	60.3	138.7														25.9559	10.376		7.324	14.648	31.128	6.714	51.575
558.5	841.6		82.3	70.3	108.8	1810.2	40.3	636.7		97.1016	240.5	206.9	147.5	118.2	101.375	310	74.5	1043.5	489.3	1387.9	110.1	38.3	633.5	1042.2	57.6	314.3	453.4	35.5														12.8302	12.207		15.869	21.667	14.038	7.629	17.7
1246.81	483		2109.2	333.3	33.8	3373.4	32.9	1584.9		118.094	516.094	104.3	32.3	292.7	880.375	89.8	150.281	518.188	503.8	556	120.7	322.8	207	497.9	679.9	446.6	8.6	24.4														13.1971	7.629		6.104	13.733	10.376	6.409	12.512
2597.28	114.5		925.1	170.1	655	191.9	30.9	520.9		515.406	544.094	229.7	142	220.1	75.3125	16.9	165.719	390.938	37.8	78.4	18.8	83.8	1620.4	26.7	302.2	30.6	21.8	38.5														10.4599	7.629		14.038	13.123	96.436	10.376	20.447
1174.91	903		1442.6	22.9	329	337.9	155.4	1.9		227.797	138.312	340.4	291.6	30	300.938	15	194.188	328.75	697.2	282.3	99.8	94.8	448.9	334.4	76.7	181	37.6	68.6														7.72166	18.005		7.935	36.621	22.583	6.409	37.537
1439.59	343.5		708.3	79.3	98.3	73	29.1	657.4		234.602	52.875	37.3	347	274.4	50.25	384.1	194.406	397.312	121.7	417.3	17.4	102	169.2	341.3	82	222.2	102.1	103.5														13.1738	11.597		8.85	18.921	19.531	7.324	14.343
171.5	385.8		320.7	134.4	599.2	500.6	78.5	2533.6		130.797	373.906	18.3	440.2	18.4	89.625	95.9	170.406	207.688	59.8	202.1	65.7	83.1	266	80	27.5	15.4	55.3	30.5														11.7812	16.479		18.311	7.935	20.447	6.409	39.978
695.219	34.5		905.4	19.7	179.3	273.3	42.1	130.4		136.305	124.5	157.5	82.3	28.2	19.125	236	83.9062	210.938	498.5	1153.5	64.2	75.3	117.9	542.9	598.8	41.7	35.4	86.2														30.3012	16.785		6.104	19.531	26.55	6.714	25.024
1306.59	338.6		1571.4	515.4	1140.3	1042.5	128.2	442.8		357.797	1606.81	403.2	98.5	417.7	121.5	29.1	138.094	817.875	401.2	198.3	92.3	193.5	1403.2	27.4	299.3	451	40.3	42.8														35.6306	8.24		17.09	21.667	30.518	6.409	34.18
223.094	333.8		1072.8	244.1	1751.7	855.9	39.1	2826.2		277.898	76	147	804.8	16.6	397.75	248.2	89.5	37.6875	93.9	416.4	66.5	464.3	206	407.4	116.7	133.8	117.3	11.5														15.7821	29.297		16.479	19.226	22.888	9.155	24.719
1626.81	242.2		565.2	73.6	1153.5	1481.3	21.8	1724		378.5	785.5	356.5	467.9	183.4	108.438	1104.9	48.4062	901	210.7	185	109	100.3	65	531.4	116.9	463.5	421.4	37.2														65.9141	7.629		10.071	10.986	24.414	6.714	12.207
4352	51.2		1598.8	45.6	1684.4	569.6	13.6	1402.8		397.305	307.688	351.2	198.4	186.4	48.875	274.5	144.375	194	70.4	111.6	55.6	133.6	1191.5	133.1	582.1	244.6	62.1	40.3														10.0947	7.629		18.005	6.714	26.855	6.104	39.368
149.562	1287.2		1311	74.5	545.5	172.1	71.5	111.2		64.1953	120.312	27.1	1207.2	158.8	280	447.2	182.719	117.125	664.7	91.3	334.1	266	179.3	347.4	324.9	262.9	45.9	169.7														27.2041	7.935		6.714	27.466	18.311	9.766	41.504
1649.94	481.5		159.9	91.3	562.8	600.9	102.3	418.9		245.805	236.906	1394.2	662.5	67.6	322.312	94.2	82.5	502.812	122.8	65.4	5	116.3	918.3	205.3	571.7	49.9	43.4	61.2														10.8086	9.766		5.798	15.259	32.043	7.324	26.245
473.312	251.6		777.6	96.1	1788.6	807.3	52.4	200.4		35	273.188	214.4	233	124.9	122	163.7	553.406	1590.69	516.7	224.1	213.5	669.7	85.5	30.9	25.5	329.5	79.2	168.3														14.1737	8.545		13.428	15.259	19.226	12.512	19.836
1153.19	845.5		340.2	36.1	89	29	139	511.5		436.398	501	7.2	400.8	63.2	78.3125	124.4	110.282	437.875	783	679.4	60.7	314.7	73.9	99.7	35.7	46.1	33	52.2														11.4831	9.46		5.798	7.019	21.973	6.714	46.997
793.188	1611.3		1694.9	258.1	1239.8	609.6	41.7	1198		585.695	106.594	281.1	439.8	109.2	15	598.1	100	144.125	397.6	447.3	305	49.8	113	483.7	68.7	358.9	344	18														11.213	9.46		12.207	29.602	16.174	8.24	10.986
80.875	572.2			112.2	898.4	638.8	84.4	61.9		143.102	289.219	159.4	154.5	155.3	414.875	759.3	54.312	531.812	813.9	221.8	95.2	435.3	212.5	927	29.1	99.8	78.5	34.8														14.7538	8.24			13.123	16.174	7.629	25.635
2684.31	374			55.5	75.7	212.3	9.1	234.8		333.203	191	261.9	1802.3	26.5	167.5	215.3	134.594	284.312	431.9	1176.7	111	164.9	142.7	345.8	352.4	90.1	17.1	165.8														10.0772	7.935			6.714	29.297	7.019	15.259
1324.5	763			25.5	528	353.1	117.8	272.8		469.5	973.594	150.7	162.4	281.8	235.938	101.1	379.312	99.375	65.8	1229.5	48.2	71.7	0	346.8	273	490.9	153.7	39														56.4582	11.902			13.733	16.174	6.104	36.011
168.938	250.8			410	56.9	355.8	166.7			961.797	98.1875	143.4	1188.4	116.5	106.5	442.7	7.875	86.5	62.6	1065.4	41.1	199.6	1607.4	111.2	74.4	174.6	92	58.2														15.5254	6.714			5.798	17.7	6.409	40.894
398.25	409.6			208.9	23.9	640.5	121.8			231.797	0.40625	240.2	420.4	21.2	113.562	446.5	115.219	611.812	0.7	108.7	464.3	32.4	350.1	53.8	650.4	266.9	123.4	23.6														27.2862	11.292			16.785	12.207	9.155	28.992
365.125	1122.5			86	118.3	227.8	51.2			536	100.094	114.2	65.9	164.6	85.1875	123	258.5	518.188	710.6	1221.3	404.9	184.8	1133.9	456.4	26.9	49.9	100	55														8.31232	7.629			6.409	20.752	6.409	20.142
924.875	582.2			146.6	722.3	320.4	83.3			310.406	689	45.5	38.2	184.6	80.9375	298.6	86.188	242.812	327.5	1486.4	81.8	204.4	157.8	74.8	74.2	44.8	21.5	23.1														24.1153	12.512			9.766	17.7	8.85	37.537
296.312	689.3			171.7	1643.4	1252.9	21.9			17	251.406	218.8	278	123.5	86	224.3	92.5933	960.5	255.3	406.2	253.1	203.6	864.5	110.9	164.4	73.5	19.9	43.5														10.1148	15.259			7.629	21.667	7.019	10.986
149.625	236.3			301.9	32	602.9	1.6			67.594	58.9062	29.3	544.7	14	70.0625	216.6	173	554	531.1	1351.3	54.8	596	1522.4	37	113.7	229.7	20	56														13.7044	9.766			21.057	14.954	6.104	22.583
254.312	595.7			35.8	314.8	1685.9	111.5			70.1091	995	325.4	527.5	19	192.938	21.6	126.5	172.812	206.8	3715.7	366	372.1	125.8	110.8	150.4	384.2	12.5	35.7														15.3655	8.85			10.376	16.785	6.714	17.395
1799.75	192.6			274.6	2159.9	2018.3	147.5			553.594	229.5	116.7	228.2	13.6	94.5625	23.5	40.7188	164.812	79.7	254.4	454.4	57.1	665.6	76	56.1	95.8	141.8	161.5														12.7287	10.986			5.493	12.817	6.104	22.583
644.75	533.2			229.1	18.2	673.3	67.3			204.609	286.406	141.2	194.3	60.7	125.312	54.2	34.9062	328.25	181.7	44.1	20.8	0	101.9	237	305.4	261.9	72	127.2														14.532	9.766			11.597	50.659	6.714	39.063
125.062	326.7			95.6	294.7	2979.7	187.5			27	62.0938	87.4	228	141.9	131.438	201.4	145.375	114	408.1	553	78	528.7	147.3	121.8	330.7	125.9	112	172.3														14.4111	36.621			8.24	34.18	8.85	25.024
102.938	464.7			136.7	117.3	445	27.8			1055.19	92.4062	31.5	253	39.1	222.375	70.5	135.5	98.8125	98.8	665.7	289.4	242.1	49.9	644	20.1	205.8	32.5	99														15.4493	12.207			7.935	16.174	6.409	12.817
524.688	1262.2			11.1	1846.2	959.9	26.8			42.8123	152.5	174.7	1008.3	29.1	239.625	428.3	140.5	204.438	93.6	264	11.8	14.8	21.4	245.2	253.5	135.3	7.4	16.3														13.3474	13.428			10.071	12.817	6.104	32.043
1301	657.7			99.6	276.3	321.7	102.7			177.891	237.375	91.5	440.6	128.5	24.6875	41.7	132	163.875	186.3	141.8	114.6	472	61.6	189	170.6	266.7	118.7	68.2														26.2971	7.629			6.104	17.7	8.85	34.485
2317.19	406.2			199.9	276.1	744.7	171.9			130.406	125.5	283	211.2	51.8	69.0625	463.3	254.719	173.125	276.3	133.8	33.5	392.8	384	793.8	61.5	319.6	149	73														16.734	9.155			36.926	10.986	6.104	35.095
1120	2312.8			383.2	574	515.1	87.5			126.594	0.40625	594.6	755.7	79.5	139.125	69.6	416.188	759.188	436.8	258.2	65.4	128.1	273	138.7	269.5	279.6	131	87.9														10.3987	10.681			8.24	21.973	9.155	27.161
192.5	465.1			193.9	3351.1	1069.4	21.5			0.40625	161.594	70.6	1.9	154.3	23.8125	292	80.4062	263.188	134.6	396.6	230.3	192.8	148.9	100.6	73.2	167.5	16.4	59.1														10.9412	9.155			5.798	21.973	6.714	18.616
134.375	1150.7			107.1	328.4	166.7	109.5			265.703	47.9062	93.1	272.3	94.6	105.062	242.3	224.312	102.875	574.8	85.3	39	89.3	137.3	496.4	255	151.1	44.5	77.4														44.322	8.85			36.316	11.292	10.376	42.725
201.75	182.2			83.7	252.6	1921.7	27.3			130.594	1938.31	191.7	117.2	48.5	102.438	171.7	0.28125	205.75	25	255.7	197.2	170.2	53	99.4	163.4	29.3	15.7	18.8														14.675	10.376			12.512	20.752	8.24	14.038
1035.25	1548.4			437.9	745.2	1118.7	182.6			447	84.1875	92.5	312.5	45.5	337.562	54.9	0.59375	180.25	211.9	242.7	68.5	252.6	607.3	217.3	723.5	283.4	81.2	51.4														9.48039	7.324			6.714	14.648	6.104	26.55
255.75	835.4			85.3	324.1	1286.8	69.4			228.297	71.5938	130	358.3	35.2	181	39.5	311.812	1602.5	688.3	931.1	639.5	29.6	519.6	555.4	128.9	488.7	44.6	60.5														11.0901	14.038			43.335	18.311	6.409	47.607
418.875	217.7			267.5	216.8	5727.7	0.7			448.109	701.312	47.3	378.9	92.2	122.75	135.6	116.094	205.938	2185.1	108.7	136.8	101.7	131.8	18.7	171.8	259.1	40.9	52.3														9.31217	7.324			14.038	26.55	7.019	50.964
85	804.2			780.8	573.6	7.2	25.5			81.188	276.594	1119.8	533.1	33.5	208.375	397.3	18.5938	515	37.9	830	62	549	579.6	19.5	55	275.7	161.4	136.5														78.2168	7.324			7.324	25.635	7.019	18.616
	625.1			132.7	922	1104.3	40.6			79.7026	43.2188	512.6	236.8	45.8	109.688	766.6	39.5	603.375		1110.7	187.7	252.1	1252.5	273.3	190.4	37.7	322.3	201.3															6.104			10.681	10.681	8.24	24.414
	1554.4			64.8	472.6	455	71.2			90.6094	545.375	678	255.9	196.5	20.3125	69.4	1.71875	41.6875		95.6	191.6	801.8	340.6	150.4	153.8	300.7	240.4	85.1															7.019			5.493	12.512	6.104	38.452
	14.4			28.8	661.7	164.2	121.5			90.688	375.812	233.4	660.7	153.8	74.5	6.3	47.6875	616.625		164.9	522.3	108.2	805.7	246.5	103.1	76.5	54.4	29															8.24			6.104	12.512	10.681	40.894
	42.5			17.6	1030	3708.8	146.6			396.609	418.812	152.5	797.1	83.8	168.812	31.4	444.594	324.625		1199.7	46.7	22.3	741.8	23.4	111.3	573.6	140.3	18.9															9.766			8.85	35.4	7.324	14.954
	275.3			271.3	16.7	1224.1	125.3			250.5	928.781	116.4	20	55.2	152.375	5.5	18.3125	1231.38		252	10.5	27.5	230.1	256.4	249	80.6	11.3	29.2															14.038			6.104	17.395	6.714	21.973
	1758.5			176.4	226.3	858.5	13.9			245.391	25.4062	22.6	880.2	211.5	64.5	53.4	1.09375	34.3125		94.3	167.4	70.4	624	33.6	481.5	394.5	119	19.1															6.714			18.311	28.381	6.409	12.512
	576			291.3	700.7	1339.2	61.6			287.406	1400.19	406.1	1071	99.3	139.188	31.9	179.312	156.312		395.2	138.3	417.5	329.6	698.1	299.6	138.3	144.7	70.3															10.986			16.174	13.733	7.019	21.057
	1403.9			163	2699.9	1102.1	143.5			588.797	83.5	106.2	464	129.6	218.812	7.5	417.688	721.062		357.5	154.4	51.2	7.8	400.2	83.1	476.1	7	81.1															9.766			18.616	18.311	6.104	32.654
	692.7			183.7	306.4	160.2	247.8			426.797	665.906	555.4	688.6	231.6	221.188	21.1	171.219	181.625		133.5	299.4	66.5	821.9	66.1	89.1	529.1	419.9	80.2															8.24			9.46	19.836	7.019	14.038
	1098.8			39.8	327.3	180.7	1.9			681.906	97.5938	165.8	3187.7	22.1	23.9375	12.2	38.6875	90.0625		77.4	284.2	401.8	163	295	332	86.6	117.9	14.7															8.85			7.629	9.46	7.935	23.804
	509.7			427.8	936.6	1048.8	28.4			158.594	37	335.7	750.7	20.2	220.5	10.6	65.9062	515.5		228.9	160.6	336.1	167.6	283.4	145.4	337.9	312.3	23.7															11.292			10.681	36.011	7.019	22.888
	248.3			212.9	234.9	1308.3	24.2			203.203	64.9062	293.2	296	30.5	93.875	30.5	187.594	383.25		118.4	41.9	395.4	596.1	36.4	351.2	196.2	24.9	23.4															6.714			20.142	63.171	7.629	15.259
	111.6			177.6	200.8	152.1	40.6			1221.7	269.188	2095.4	1727.7	36.3	101.688	8.7	87.9062	292.562		183.6	152.4	323.8	36.9	1410.6	253	107.6	194.9	26.2															6.409			7.935	31.128	6.104	32.959
	908			136.8	741.1	692.8	109.1			584.797	101.812	483.7	1007.5	50.7	136.75	18.9	42.0938	92.8125		1804.6	37.4	51.8	653.4	170.5	32.2	89.9	96.3	49.4															7.629			10.376	26.855	6.104	21.973
	19.9			290.5	113.1	1278.5	19.6			290	293.781	635	465.6	167.4	507.562	8.5	91.1875	114.875		1251.1	124.1	199.4	179.3	372.5	394.1	252.4	101.4	48.4															7.629			27.771	15.564	6.409	20.752
	499.6			66.7	60.2	513.2	191.1			316.109	322.906	201.7	457.4	90.8	138.812	31	69.625	890.812		428	25.4	91.7	234.1	87.9	97.3	78.1	16.9	65.2															11.597			6.104	13.733	8.85	32.959
	468.1			199.2	590	616.5	252.6			129.391	86.3123	392.7	155.4	305.5	165.625	15.6	827.188	129.688		92.8	16.7	98	117.2	1070.9	39.3	165.8	224	61.4															9.46			27.771	20.447	6.104	21.973
	410.5			465.2	1023.5	3537.7	10.5			35.7969	268.688	58.3	618.8	46.2	25.0625	22.1	230.188	1124.62		505.2	261	236.5	310.1	211.1	22.4	100.5	89.3	41															9.46			26.245	10.071	7.019	10.986
	85			220.8	899.6	935.1	108.3			1712.31	43.8123	492.9	139.7	183.9	306.625	27.1	232.812	96.625		187.7	360.1	80.6	281.6	473.3	106	88.8	132.7	19.5															7.324			10.071	13.123	8.24	20.142
	2455.1			237.6	1032	2052.1	16.4			463.297	333.906	923.1	886.7	87.7	155.812	11.4	173.5	164.562		409.1	266.6	167.4	108	679.9	435.5	306.4	316.6	17.5															11.292			7.019	16.174	6.409	36.011
	1315.8			54.1	1476.4	116.7	67.5			251	169.5	342.7	514.1	16.4	204.375	14.8	166.5	561.125		543.7	712.2	303	109.9	889.1	104	328.9	61.2	25.4															13.123			17.09	20.447	6.409	23.193
	1282.4			357.4	74	1317.1	188.5			156.703	697.282	210.7	241.4	94.2	21.8125	13.8	42.1875	432.375		336.5	79	28.1	136.8	432.4	215.5	202.6	94.1	116.8															7.324			10.071	17.7	7.324	55.237
	100.2			164	390.9	698.3	72.8			38	104	96.4	180	118.5	102.812	20.7	9.5	490.188		91.5	168.5	98.8	158.8	364.7	464.3	100.3	122	12															11.902			26.245	20.447	7.935	39.978
	1691.5			304.4	1133	1499.9	386.9			107.094	69	664.4	182.7	66.4	26	9.4	40.3125	211.25		925.9	93.2	295.1	125.9	49.3	122.2	274.8	112	28.6															7.935			11.902	16.785	7.935	17.7
	79.6			308.4	194	1	28.1			94.5	202.219	126.5	772.4	134.2	231.062	9.1	355.688	802.5		103.5	90.6	43.4	457.9	272.1	40.1	74	18.9	67.2															9.155			23.193	29.297	6.714	10.986
	110.9			258.6	187	838.1	11.5			222.203	130.594	34	147.6	38.4	137.438	13.9	311.625	295.562		213.6	205.3	44	134	179.6	359.9	76.7	180.9	28.9															8.24			7.324	15.869	6.714	13.428
	1517.2			12.2	1902.2	187.5	8.4			253	620.906	402.6	577.8	158.9	184.25	28.3	163.5	110		466.8	403	332.4	129.3	263.6	173	352.5	252.4	65.4															102.844			10.986	19.531	6.104	10.681
				138.1	865.8	551.9	31.4			134.594	829.375	624.6	561.8	154	177.25	43.9	272.281	143.938		684.4	38.4	140.9	718.4	358.5	57.8	60.5	54.6	22.3																		18.005	27.771	6.409	29.602
				31.4	606.4	1210.2	221.9			237.297	634.312	275.3	602.4	206.5	164.062	11.6	350.406	407.688		777.8	302.8	9.1	1186.1	144.2	745.4	295.3	76.4	207.2																		19.836	11.292	7.629	34.79
				858	2734.9	2804.9	112.5			1275.5	54.1875	139.3	508	24.5	232.812	22.6	0.90625	694.812		416.7	14.5	560.4	752.2	629.5	20.1	79.1	277.6	56.2																		18.921	10.986	7.629	46.997
				720.5	1156.6	116.9	43.1			42.5	722.219	110.3	354.1	28.2	659.312	32.2	117.594	236.875		417	181	155.8	621.1	16.8	11.6	476.7	28.7	65.8																		14.343	18.616	6.104	16.174
				35.1	573.7	47.6	24.9			468.703	99.9062	876.1	80.9	19.4	218.688	27.7	184.094	1365.12		29	64.4	205.7	515.9	679.2	130.4	135.2	96.5	379.5																		33.875	47.913	8.85	48.828
				37.6	1240	360.4	59.5			499.297	74.6875	171.7	671.5	40.9	212.125	20.6	114.812	166.562		259.2	138.9	160.2	59.4	687.9	113	21.5	209	26.6																		10.071	16.479	6.104	17.7
				38.8	1779.4	296.3	81.5			732.203	302.406	184.3	616.4	175.2	351	13.5	67	78.125		205.9	174.8	613.1	36.6	333.7	124.6	80.1	35.7	142.2																		7.935	24.109	6.714	13.428
				12.8	145	1694.6	203.7			34.7969	502.906	39.5	1478.4	54.4	137	23.8	440.594	774.5		726.9	26.2	189.7	378.1	853.7	691.8	28.9	69.5	1.6																		13.733	14.038	9.155	16.479
				450.5	163.7	264.3	49.8			23.4062	137.594	1292	806.7	27.3	120.5	18.4	68.1875	308.812		549	254.1	46.7	665.6	616	84.5	261.1	33.6	43.3																		12.817	18.311	8.24	51.27
				186.3	834.1	1275.1	75.1			1.29688	639.281	533.8	645.5	111.4	159.5	20.5	160	55		225.4	202	45.8	50.4	29.4	490.3	335.2	154	21.4																		17.395	17.09	6.409	19.531
				38	249.2	183.6	76.6			198.109	91	162.1	198.1	48.6	296.688	11.2	83	350		549.9	155.5	226.1	85.5	660.7	66.8	311.7	151.1	73																		15.259	18.005	9.155	12.817
				18.2	472.8	647.9	28.3			209.688	129.907	137.4	45.3	8	78.875	69.1	38	446.25		80.2	38.6	180.7	112.5	550.9	260.7	68.6	276.9	32.2																		13.123	22.888	7.019	24.719
				418.5	341.3	364.5	133.8			50.2031	370.218	36.7	101.1	26.3	234.812	9.9	256.219	119.125		698.6	133.4	144.2	550.8	92.1	37.6	25.7	43.3	112.3																		18.311	17.7	6.104	14.343
				70.8	258	574.1	89.2			824.406	378.875	20.5	47	114.7	179.875	16	87.0938	646.625		722.6	92.1	128.4	194.2	462.3	180	65.3	157.7	204.9																		25.635	12.817	6.104	17.7
				23.1	116	1169.9	39			270.5	16.125	70.2	2103.8	26.9	13.5	55.1	196.406	411		23.1	48.7	68.7	38.9	1045.8	663.8	264.5	307.3	158.3																		25.635	20.142	7.019	23.193
				559.2	297.7	2685	197.7			0.59375	539.594	313.4	577.5	128.2	29.5	15.5	100.906	503.062		566.8	33.6	118.1	33.3	483.7	434.5	63.6	218.4	292.9																		25.94	10.681	6.409	30.212
				80.7	633.1	3468.8	23.5			145.297	130.906	5.9	219.4	87.5	170.625	21.6	210.688	656.625		308.8	50.5	810.9	337.7	1611.5	42.4	174.6	47.4	318.7																		14.954	9.155	6.104	45.471
				329.8	1053.9	534.8	24.8			0.3125	941.375	22.6	253.3	90.3	319.375	77.4	120.906	252.688		1601.5	165.7	249.9	177.4	108.7	14.4	658	266.1	8.7																		7.629	24.719	6.409	13.428
				961.8	451.4	7721.5	50.7			956.391	65.625	312.8	338.2	22.7	122.625	23	257.781	285.188		130.8	144.3	119.6	472.6	406.6	125	695.5	103.3	28.9																		8.545	13.123	8.24	27.466
				394	928.5	1073.6	75.7			118.797	85.375	765.2	1164.2	98.1	232.688	13.5	145.719	425.688		269.1	424.8	542.5	817.2	818.1	74.9	253.5	26.4	191.8																		11.292	8.545	10.376	13.733
				14.2	1146.3	0.6	168.8			574.609	78.4062	475.5	60.8	88.5	142.438	14.3	183	351.312		554.4	769	173.7	308.9	142.1	345.3	146.3	248.5	21.5																		26.245	10.681	6.409	37.537
				1189.8	645	330.7	55.8			307.391	218.812	291.5	187.8	372.8	228.75	17.4	271.688	1204.94		529.8	214.1	25.4	44.9	289.3	335.2	44.3	101.2	138.1																		7.629	39.978	7.629	16.479
				29.8	1281.7	4086.9	106.1			130.812	265.406	167.4	87.9	49.4	36.3125	86	107.406	197.25		1278.3	1.2	130.8	286.8	191.3	120.1	19.1	548	59.2																		8.24	9.766	6.104	23.499
				262.2	417.8	127.8	27.3			88.3906	33	847.9	173.9	15.4	23.5	48.2	199.312	103.812		230.8	68.3	217.6	1240	878.3	175.4	125.6	81.9	144.2																		6.714	22.278	6.104	33.875
				22.8	352	85.5	52.2			485.109	145.188	196.1	940.3	33.3	253.125	15.2	30	315.312		256	37	175.2	199.3	247.5	140.9	85.1	12.3	18.4																		6.714	15.869	7.019	11.597
				50.2	462.8	604.8	2.3			100.094	609.906	784.1	125.4	30.4	227.375	29.1	73.5938	55.875		238.2	102.3	13.2	238.7	1611.3	178.5	53.1	267.7	37.4																		27.771	20.752	8.545	33.875
				97.3	630.4	622.1	96.2			311.703	556.594	231	30	61.8	14.9375	8.4	0.40625	221.938		90.1	43.8	265.3	369.9	677.5	623.8	77.7	41.8	114.9																		26.855	16.174	10.986	28.381
				26.1	136.8		86.6			590.5	642.5	238.4	761.6	168.4	332.062	14	106.875	628.5		385.8	242.7	210	213	842.9	84.1	99.5	114.2	18.7																		14.038	36.011		17.09
				16.5	140.6		67.4			164.297	37.0938	203.8	732.2	89.2	632.812	53.1	258.906	273.688		899.7	147.1	238.2	632	1455.2	364.3	447.4	140.5	21.4																		15.869	17.09		22.583
				157.1	836.7		12.2			189.203	375.594	560	470	42.2	400.5	22.1	400	860.875		1984.7	199.5	521.8	270.7	815.2	137	341.5	127.7	210.3																		9.766	10.681		33.264
				391.4	2057		90.1			311.891	302.719	410.3	214.2	77.5	175.875	88.2	97.7188	176.312		67	85.8	938.5	258.6	664.4	343.5	280.4	719.4	153.5																		18.616	33.264		23.193
				233.2	29.8		168.5			424.406	143.688	190.7	100.7	41.9	395.625	69.2	42.0938	67.625		216.4	230.7	137	469.6	819	134.8	222.4	29.9	26.4																		11.292	13.123		21.362
				236.6	40.4		142.1			429.297	132.406	74.6	75	100.2	143	21.8	26.1875	394.312		185.4	23.9	182.3	209.9	195.2	138.2	13.9	169.9	54.2																		5.493	12.207		25.635
				46.7	90		21.3			202.906	296.188	462.1	323.2	47.4	252.812	25.7	48.5938	105.25		82.6	91.1	34.1	33.6	375.1	1061.9	176.2	156.1	128																		21.362	12.207		10.681
				193.4	93.7		89.6			452.703	136.312	134.7	33.9	43.3	7.8125	74.4	76.7188	99.25		504.7	83.9	72.1	149	1780.1	34.8	971.4	31.5	53.3																		6.409	14.648		34.79
				242.6	526.3		39			192.094	244.094	345.2	352.1	84.8	115.188	22.1	73.7812	161.25		730.7	98.4	171.6	1410.5	841.9	205.6	83.8	39.3	34																		11.292	23.804		22.278
				293.6	244.4		9.7			241.703	268.719	526.8	326.2	35.8	44.5625	20.8	309.812	100.75		39.8	406.6	420.3	225	53.6	262.8	22.6	8.9	70.8																		18.005	14.954		20.447
				62.6	145.3		184.6			191.797	81.6875	142	699.3	30.7	64.125	50.5	168.406	320.688		62.9	162.5	299	726	1727.8	268.4	37.8	105.3	16.1																		15.564	32.959		41.504
				73.1	242		146.4			248.594	161.906	232.6	21.2	26.7	173.688	30.3	50.5938	673.812		180.6	449.2	43.8	49.9	83.9	282.1	282	133.3	22.6																		18.616	13.733		16.174
				334	371		66.3			53.1094	645	276.3	254	47.1	134.688	10.7	73.6875	67.0625		759	546.5	180.4	182.9	2803.1	61.1	276.9	123.6	9																		10.986	23.499		18.616
				125.4	72.2		220.8			77.7969	252.688	187.4	153.2	61.4	241.312	16.5	52	159		46.5	248.3	71.1	74.7	41.9	589.6	523.1	56.7	129																		10.986	9.46		25.94
				329.1	933.3		99.9			205.703	67.2188	103.9	132.4	57.3	20.3125	58.1	180.312	1172.5		812.4	216.6	205.4	81.1	1882.1	159.9	202.8	13.4	27																		9.46	24.109		23.804
				241.3	1852.4		41.2			821.391	969.688	56.4	853.5	25.5	141.312	17.9	111.594	169.812		762	115	65.2	754.4	1583.2	176.1	268.7	193.3	29																		15.259	9.155		11.597
				380.4	2483.7		113.4			310	481.094	128.8	115.7	57.3	54.5625	8.7	54.2188	299		93.6	33.8	39.2	63.7	191.6	370.1	350.8	99.9	28.2																		16.174	24.719		14.038
				309.6	509.4		70.6			38.7031	182.812	108.4	839.2	21.5	133.125	9.9	0.59375	1159.19		798.1	244.7	297.8	393.6	463.5	187.7	74.8	171.6	27.7																		7.019	20.752		25.024
				309.6	21.1		34.7			64.2031	76.5	435.7	150.6	15.4	146	43.5	101.406	157.625		500.5	189.6	106	421.2	1096.6	204.8	62.5	11.5	41.1																		30.823	30.212		10.681
				146.1	893.5		21.6			0.296875	162.906	192.3	417.5	39.8	186.875	8.4	85.375	118.375		2326.8	46.7	99.1	639.5	241.8	604	601.2	105.5	14.9																		10.986	13.428		14.343
				31.5	624.6		35.5			172.5	130.5	321.6	271.2	82	184	16.4	77.4062	574.438		1804.7	180.4	77.2	1056.2	530.8	157.3	707.4	119.1	22.9																		28.076	15.259		18.616
				45	355		74.7			438.797	318.188	582.4	1053.5	58.7	281.25	39	244.812	355.188		21	36.1	58.5	621.6	1319.1	72.9	449.6	145.5	136																		10.376	23.499		20.752
				60.5	369.5		70.1			160.312	47.8125	47	185.2	12.3	122.188	11.5	211.688	1197.19		1100	379.9	717	28.2	481.5	135.5	375.6	135.6	36.7																		6.409	15.564		12.512
				98.8	279.2		89.1			121.391	160.375	59.1	1666.3	40.4	159.562	26.6	1.09375	453.625		719.9	103.7	121.3	68.6	893.4	309.4	777.6	76.4	88.6																		35.4	17.395		32.043
				46.4	689.1		61.3			643.797	44.2188	318.2	260	43.3	15.625	24.6	115.406	44.1875		164.5	96.8	162.2	721.8	190.6	387.7	705.8	150.6	58.5																		10.071	8.545		11.597
				107.4	299.3		60.9			333.609	54.5	471.1	396.8	61.7	160	13.8	322.219	595.312		1733.2	353.1	487.3	576.2	36.7	165.9	122.5	89.8	169.5																		32.043	19.531		14.038
				281.9	70.7		18.6			151.594	412.688	185.2	474.1	91.1	287.375	14.6	169.281	81.5625		296.3	230.7	144	308.7		249.5	235.1	244.9	47.4																		7.324	10.681		26.245
				40.8	274.9		58.9			50.4062	99.0938	285.4	198.5	63.6	558.938	25.8	668.719	103.312		119.2	68.3	722.5	251.5		105.9	204.8	87.8	35.5																		34.18	17.09		23.193
				79.2	677.9		160.2			704.297	631.125	1072.8	26.2	38.3	64.875	22.1	510.188	87		95	86.2	177	174.7		45.2	163.4	106	30.1																		21.667	10.986		24.414
				156.4	564.8		74.8			31.7031	109.594	667.9	717.3	47.8	404.625	6.7	838.5	1136.12		640.5	36	285.6	60.4		33.7	58.1	103.2	34.4																		7.019	17.7		25.33
				252.6	2857.6		191.8			231.797	35.5938	28.6	163	10.6	65.375	13.3	97.6875	68		793.1	42.7	20	121.1		130.4	66.1	1.4	42.5																		29.907	25.635		50.049
				222.9	816.5		18.5			41.7969	49.5	22.5	47.3	31	32.5	71.2	131.812	244.25		248.3	102.9	567.8	300.6		586.2	268.5	43.4	24.5																		55.542	19.836		16.785
				89.5	735.2		1.5			63.7969	78.0938	254.2	317.8	49.2	132	10.9	87.9062	571.5		513	532	137.2	106.4		683.6	462.9	85.7	26.1																		35.095	14.954		44.861
				1058.9	718.2		129.3			461	110.219	321.4	111.1	165.8	106.188	24.4	194	1233.94		481.2	261.5	69.7	179.6		87.1	165.3	49.1	125.7																		21.057	57.068		20.447
				172.4	1331.4		243.4			104.406	173.5	144.9	115.6	12.4	13.8125	11.4	0.78125	529.062		1233.4	95.9	127.4	155.3		234.7	106.7	17.4	57																		15.564	11.597		13.733
				367.9	1081		49.3			419.594	35.5938	480.9	101.9	52.7	144.5	22.2	118.625	39.9375		341.4	114.9	24	378.8		47.5	358.7	591.5	0.8																		12.817	16.174		10.681
				147.1	379.8		84.2			271.406	154.406	87.7	28.6	31.4	1071	6.1	76.7812	202.562		224	98.7	670.4	523.7		16.9	373.8	91.3	31.8																		29.907	21.973		20.447
				391.5	386.4		63.8			520.406	18.2812	429.9	523.8	18.7	62.6875	9.7	73.4062	812.938		553.6	102	85.8	62.8		21.4	367.3	187.2	66.3																		8.24	30.823		24.414
				11.8	355.1		401.2			425.5	89.5	242.1	577.2	19.8	27.8125	35.7	149.188	14.0625		939.8	433	1054.4	137.6		18.1	163.1	69.2	25.7																		8.85	23.499		20.752
				25.9	127.2		83.8			162.797	47.5	479.8	128.7	22.1	99	27.1	372.719	33.125		1540	645.3	30	24.4		425.6	91.6	122.8	31.9																		17.09	20.752		29.297
				56.9	504.6		29.1			259.891	171.594	141	115.6	116.5	38.125	9.6	210.5	134.875		204.8	44.3	213.9	286.2		250.8	164.1	55.9	139.8																		17.09	14.038		33.569
				63.8	53.7		75.6			181.703	120.625	539.6	257.9	219.1	94.6875	24.4	212.688	170.75		295.1	28.6	86.8	87		218	126.1	379.5	58.4																		5.798	20.447		33.569
				242.2	907.7		17.8			205.297	617.875	553.8	222.5	90	58.875	23.6	121.719	63.6875		256.5	26.7	57.7	312.6		663.7	223.3	61.2	48.2																		7.324	18.921		34.79
				77.7	3042.1		143.3			116.703	98.625	1407.2	221	6.8	148.75	25.8	135	136.375		388.8	122.2	164.8	48.9		48.6	48.5	252.9	174.5																		10.681	17.09		14.648
				54.7	1485.8		49.2			188.109	191.875	134.1	194.2	77.1	180.188	26	280.5	210.5		870.9	154.3	202.1	623		204.7	8.1	106.2	16.1																		26.55	24.719		12.817
				71.7	1217.1		34.2			343.594	58.9062	184.1	36.5	20.8	144	12.9	71.875	13.6875		75.6	66.2	611	127.2		117.5	181.1	92.6	82.9																		22.888	14.038		41.504
				296.2	138.6		117.3			138.906	32.2188	482.8	607.4	23.8	81.5625	17.1	311.5	47.25		299.9	87.1	100.9	381.8		119.7	481.8	268.2	56.5																		32.349	37.842		25.024
				37.6	385		265.2			417.391	56.5938	500.3	318.2	21.2	135.75	17.5	101.812	571.75		24.5	212.1	204.4	82.9		336.8	46.3	263.5	47.4																		13.428	18.311		32.349
				36.4	373.9		58.4			398.906	87.9062	247.4	801.1	14.5	47.25	19.3	684.188	153.75		1725.8	231.2	468.2	119.8		105.3	220.9	273	72.7																		7.324	11.597		12.512
				23.2	2639.5		13.2			229.391	249	547.2	120.6	16.3	49.9375	23.9	136	214.688		341.5	429	13.4	344.5		148.9	161.6	82.2	105.8																		15.564	15.869		15.564
				248.8	266.6		45.1			80.4062	972.594	211.7	29.7	36.3	31.3125	20.3	369.406	703.312		224.8	337.7	135.3	291.4		42.1	143.2	12.2	89.5																		10.071	28.992		12.817
				48.6	105.8		65.8			148.406	364.5	143.1	594.4	21.8	221.688	12.1	0.3125	151		546.8	41.4	594.2	932.6		397.8	111.5	109.2	64.1																		12.207	18.921		14.648
				990	855.6		56.5			124.688	0.28125	374.4	921.8	89.3	267.562	39.8	46.6875	286		440	412.8	224.8	289.3		144.9	228.1	255.3	255.6																		14.343	14.648		10.681
				337.7	55.1		40.2			785.5	142.719	17.7	204.9	77.1	172	59.5	83	206.188		166.5	167	196.2	33.4		35.7	408.4	410.2	11.3																		31.738	10.376		32.349
				370	121.3		80.9			295	366	113	1280.1	211	311.5	19.2	152.312	550.812		1030.4	76.8	416.3	124.6		62.7	154.5	150.9	63.9																		15.259	12.817		10.681
				70.1	11.5		24.3			110.812	1131.5	135.6	341.1	42.8	29.9375	23.3	110	433.375		53.2	382.2	175.5	880		160.8	269	83.3	13																		12.207	11.597		20.142
				209.2	317.6		159.3			0.6875	1388.5	289.2	426.5	25.3	65.5	15.5	101.281	478.312		143.2	840.9	15.9	219.8		104.7	152.5	204.9	274.1																		19.226	16.785		33.264
				15.6	662		85.7			142.203	117.688	20.8	1089.9	105.4	151.562	27.7	61.2188	126		135.3	33.3	98	147.5		694.5	135.1	42.6	149.7																		58.289	29.602		21.362
				113.3	2380.5		68.3			18.2031	45.5938	58.2	295.6	73.5	46.5	165	36.5	738.188		44.8	743.1	280.5	148.1		643.1	65.9	16.5	33.3																		19.226	18.311		35.4
				353.2	823.8		75.2			173.703	1938.31	541	332.6	13.2	24.9375	8	0.78125	734.688		1753.6	91.6	61.8	907.1		367	11.1	93.8	75.3																		24.719	16.174		12.207
				342.5	211.8		28.8			206.094	103.688	210	379.5	22.8	67.875	35.4	181.125	230.125		463.2	162.3	240.7	23.3		516.6	36.1	21.4	27.4																		11.597	9.46		35.706
				50.1	176.8		51.9			489	155.219	220	115.3	178.9	34.3125	33.3	93.875	210.5		77	101.5	56.4	75.7		786.3	427.1	131.7	81.3																		15.564	22.583		14.343
				248.6	206.5		103.8			800.703	302.406	12.6	317.5	18	79.1875	33.6	151.625	783.062		164.6	32.9	734.2	18.5		215.2	31	87.2	68.2																		6.409	32.043		12.512
				87.8	105.5		49.7			102.906	264.594	360.1	1538.2	21.4	146.312	66.7	127.875	1149.31		110.5	72	101.3	762.8		1056	337.2	22.1	70.3																		7.935	16.479		23.499
				122.7	279.1		121.6			202.391	231.406	743.8	224.7	102	51.3125	11.7	255.125	132.812		39.4	44.8	46.7	877.7		171.8	156.4	10	106.2																		30.212	13.428		20.447
				78.3	336.8		43.5			690.109	121.188	240.2	673.5	85	73.875	57.8	194.594	39.375		659.8	414.2	295.9	1003.6		92.7	100.8	196.7	219.4																		7.324	26.55		13.428
				339.7	319.3		8.9			581.688	202.906	129.7	527.1	51.1	29.6875	18.9	339.688	229.312		448.4	390.9	19.2	105		274.3	724.9	43.6	19.1																		7.935	29.907		15.259
				117.9	188.2		90			417.609	51.4062	63.8	390.2	34.3	332.312	15.3	278.812	143.125		69.9	459.4	88.4	248.5		0	49.6	120.5	88.1																		10.071	12.512		15.259
				1527.1	56.2		1.7			373.094	50.1875	487.2	40.1	58.9	84.125	34.2	33.5	403.062		404.6	162.4	27.6	315.3		230.2	361	43.4	88.5																		23.499	21.057		16.785
				207.7	16.2		16.6			293	266	682.2	366.5	33.5	139.562	16.9	253.406	293.5		44.3	341.8	61.8	629.5		247.5	91.5	18.6	38.5																		15.869	13.733		18.311
				127.5	133.3		87.7			63.6094	219.312	557	275.4	69.4	22.25	14.4	401.281	163.25		107.6	180.4	613.6	75.5		521.4	37.2	116	18.5																		29.602	12.512		14.038
				268.8	56.2		36.6			50.7969	64.5	1.7	251.7	73	295.75	114.5	128.5	302.688		283.9	228.4	407.3	502.3		135.6	265.9	169.8	158.4																		41.504	11.902		22.583
				480.1	76.4		348.7			279.203	59.6875	108.1	52.4	80.5	107.438	86.9	280.219	76.375		370.1	354	93.2	149.9		167.7	102.4	534.9	62.5																		28.381	14.954		63.477
				129.4	268.3		114			106.797	364.812	247.2	1292.8	21.8	169.375	15.9	147.375	174.125		258.5	203.4	18	568.7		55.5	321	37.1	44.7																		30.518	15.869		45.166
				207.1	233		76.8			845.594	219.094	251.9	89.1	32.5	29.125	15.3	88.3125	452.688		572.3	197.2	32.7	552.2		543.5	56.7	216.3	56.2																		19.836	32.654		23.193
				301.9	149.8		99.5			185.609	78.0938	335.7	238.2	49.7	26.8125	12.4	227.688	255.375		88.3	321.1	239.7	383.3		292.4	20.9	111.9	32.2																		11.292	30.823		14.954
				32	719.8		141.7			449.188	312	75.3	983.4	145.6	116.188	15.3	76.625	344.5		201.5	211.2	179.8	134.1		149.9	58	16.2	21.9																		41.809	12.817		29.297
				635	107.6		43.5			106	57.3125	228.3	401.2	36.1	162.812	12.2	0.59375	325		43.6	140.2	50.7	234.1		75.6	226.4	169.7	203.6																		7.935	12.512		11.597
				104.5	383.5		6.4			118.203	522.688	128.7	1633.9	68.5	25.5625	28.1	280.5	239.812		529.9	204.6	349.5	1025.8		347.1	304	17.9	15.2																		5.493	24.109		15.869
				800.2	23.6		34.1			60	70	53.4	259.5	0.9	45.625	15.8	179.406	63.5		165.9	115.2	100.6	123.8		43.8	58.3	324	75.1																		19.836	27.466		21.057
				45	769.2		229.2			655.609	402.312	340.6	146.9	76.5	464.5	54.5	155.094	103.125		360.3	123.4	213.6	468.3		185.5	47.3	73.9	13.3																		10.071	13.428		17.7
				83.1	110.8		18.2			396.188	229.5	41.2	49.5	15.5	92.1875	16	172.906	194.5		332.9	28.2	28.7	3195.4		14.3	99.3	91.7	128.6																		25.024	25.33		38.452
				216.3	58.4		109.7			226	144.188	63.5	537.8	41.3	250.812	120.7	71.875	78.5		961.6	81.2	304.2	367.6		63	36.5	213.5	15.7																		18.311	13.733		17.395
				298.7	353		169			158.703	855.094	829.7	68.2	46.3	14.5	10	192.719	43.8125		487.4	117.4	106.2	232.6		410.1	208	59.7	120.6																		10.376	24.719		19.531
				52.8	393.7		159.5			671.797	67.0938	569.5	235	34.1	139.188	43.9	147	734.562			88.4	174.7	201.9		433.8	211.9	24.9	60.2																		20.142	10.681		31.433
				457.5	351.1		16.8			532.703	326.5	145	706.4	70.1	133.812	28.6	0.28125	44.75			158.3	163.5	151.8		519.7	105.5	66.3	57.6																		12.512	13.428		25.33
				336.1	161.2		53.5			570.109	561.719	305.6	233.2	78.1	175.688	53.2	0.71875	224			598.7	10.9	29		73.1	162.1	532.3	7.6																		19.226	18.311		14.038
				54.2	581.9		147.8			722.797	292.906	114.5	1955.3	92.5	150	109.8	81.5	355			32	79.7	185.8		111.5	130.6	177	121.2																		19.226	12.817		34.485
				38	306.7		163.1			0.296875	352.688	1406.4	95.9	12.5	375.312	19.7	82.0938	233.25			393	1301.4	289		552	192.6	207	68.7																		19.226	15.869		18.005
				23.2	211.4		62.6			653.094	187.188	1537.4	66.8	82.8	31.5	15.5	528.094	217.75			133.4	970.2	158.2		75.9	300.5	10.7	0.4																		27.466	15.259		14.038
				129.9	57.8		151.7			43.1094	422.219	549	1609.6	28.4	127.812	31.7	198.406	192.125			30.1	71	1467.8		204.2	133.6	77.8	92.1																		10.681	18.616		10.986
				208.7	39.1		13.8			50.8906	639.281	521	331.8	40	73.5	66	192.906	268.875			73.2	178.6	52		161.6	248	25.6	29.5																		9.46	19.226		12.207
				20.5	655.2		118.4			644	0.40625	92.9	69.6	64.2	61.75	152.3	83.9062	356			583.5	78.3	693.4		254.5	417.1	105.5	153.3																		9.46	14.954		39.673
				410.1	734.2		241.2			361	152.594	324.4	231.5	23.7	427.5	87.1	92.5938	279.5			8.7	116.6	542		349.7	23.6	74.5	27.7																		10.071	13.733		12.512
				182.5	370		20.2			195.609	619.312	162.4	415.5	33.1	491.5	96.9	314.094	353.125			21.3	159.9	164.4		305.5	167.6	28.3	181.3																		28.687	22.888		19.226
				67.1	97.8		22.5			163.797	15.0938	38	195.9	59.8	117.25	37.2	209.406	121.875			186.4	24.6	53.7		373.2	25.4	115.3	70																		15.564	23.499		22.888
				137.6	301.8		407.2			76.5	54.0938	284.6	447.7	21.2	193.5	38.6	140	42.125			415.9	87.2	462.7		475.7	117.1	247	83.7																		16.479	11.902		49.438
				37.6	414.9		440.8			524.906	92.625	421.7	687.2	66.1	95.1875	15	0.40625	732			100.7	35.6	140.9		94.7	115.5	227.3	15.6																		23.804	7.935		13.733
				788.3	354.2		107.6			966.797	220.781	375.9	28.3	86.7	94.375	9.3	316.281	49.125			50.2	229.2	661.3		58.2	0	22.3	133.1																		17.7	26.55		30.823
				413.3	50.3		103.3			262.203	264.812	645.2	327.6	31.5	75.1875	28.7	294.594	202.25			446.4	372	513.2		88.5	581.8	20.7	7.7																		32.959	8.85		23.193
				93	961.8		501.2			224	650.906	442.2	418.9	63.8	92.3125	11.2	133.719	229			266.8	420.2	750		148.6	74.6	22.9	79.8																		18.311	20.447		25.33
				87.3	183.4		17.5			184	126.688	235.5	91.7	51.5	15	95.7	32.5938	48			73.5	528	235.1		245.7	375.2	34.7	78.3																		21.057	13.123		13.123
				284.8	146.8		124.9			305.797	585.312	32	213.2	27.3	17.9375	16.3	201	299.875			244.3	227.4	514.7		407.8	79	209.3	16.1																		6.104	25.33		40.588
				706	639.3		208.2			312.094	34.5	461.2	493.9	7	448.562	63.7	228.094	99.125			441.4	22.6	464.9		133.8	171.8	41.1	109.8																		17.7	22.583		19.836
				275.4	680		290.6			1596.41	145.781	94.4	1005.2	67.7	193.125	22.5	53.0938	485.5			143.7	247.6	622.2		162.4	54.8	150.6	59																		14.343	12.512		29.907
				633.2	854.6		144.4			169.594	541.219	24.5	385.3	52.9	201.875	13.4	773.906	131.875			120.3	74.3	161.7		95.9	39.1	37.5	52.3																		11.902	29.297		13.733
				64.7	1382.5		41.9			556.203	484.281	368.8	293.8	85	210.5	51.1	102.5	107.75			27.7	366.6	1125.8		296.3	37	70.9	61.1																		10.681	16.174		18.616
				111.7	398.8		206.7			165.406	1008	73	152.5	59.9	43.625	15.3	96.2188	866.75			145.5	205.9	290.1		78.8	165.6	219.7	50.2																		14.343	10.071		16.785
				53.9	259.4		104.7			163.797	104.812	263.1	187.2	13.6	414.562	23.9	198.375	745.25			28.5	18.2	2095.8		990	130.4	11.4	17.4																		28.381	16.479		16.174
				227.9	884.7		17.9			365.5	55.0938	74.6	143.8	69.7	143.312	39.7	37.8125	209.5			339.4	121.6	86.6		205	158	144.2	50.3																		8.85	14.038		11.902
				152.4	64		233.7			315.891	368.188	104.2	868.6	31.3	206.5	51.6	226.188	374.625			40.2	232.5	812.2		567.7	18.1	47.1	27.3																		31.738	26.245		27.771
				581	236.2		134.4			285.5	229	296.2	720.8	56.5	191.438	14	84.9062	229.25			57.5	191.2	194.1		328.4	169.1	96	58.5																		24.109	37.231		13.123
				37.5	484.9		641.9			151	350.625	136.6	95.3	42.9	68.75	13.6	296.5	420			514.5	209.7	170.5		129.2	68.8	64.1	98.3																		10.071	21.973		22.278
				206.6	223		70.6			52.6094	274.594	130.7	645	32.7	82.125	155.1	431.812	194.5			317.1	171.8	315.4		121.7	427.5	130.4	16.9																		13.123	25.024		18.311
				67.6	109.4		225.1			52.3125	273.406	211	98.6	60.2	300.188	84.7	48.5938	715.375			96.9	450.6	261.6		216.6	205.6	89.3	45.4																		5.798	24.414		19.836
				26.1	1301.3		14.6			606.188	248.688	44.5	442.9	117.8	251.438	11.4	209.188	202.25			227.3	236.8	534.7		110.5	54.8	115.4	24.4																		11.902	40.283		24.109
				207.3	179.9		2.4			876.906	470.188	220.2	272.9	14	25.375	32.1	80.5	257.125			269.3	366.9	235.9		163.7	73.4	37.2	58.3																		8.24	38.147		31.738
				101	104.6		37.9			32.6877	219.812	1154.3	1141.1	55.5	645.188	51.5	150.719	90.875			20	64.9	1214.8		418.9	53.6	37.9	188.9																		6.714	13.123		33.875
				77.9	1582.2		138.2			206.5	81.5	1187.7	327.1	288.3	369.5	30.9	54.5	50.625			7.3	34.4	704.9		432.4	221.8	69.5	22.4																		32.349	13.428		23.804
				248.7	129.2		114.7			781.093	1751.31	292.6	89.9	29.5	114.5	17.2	391.906	140.125			21	41.7	59.4		135.8	293.1	38.4	76.2																		35.095	12.817		32.349
				94.3	1256.6		273.2			349.312	472.781	232.1	530.6	81.7	290.938	66.3	56.5	371.125			66	88.7	40		140.8	170.1	116.3	72.9																		26.855	16.174		18.616
				233.1	1348.3		37			0.40625	0.40625	1566.8	113.5	57.3	19.1875	27.3	74.375	66.5			271.1	64.3	611.9		238.7	120.5	26.2	150.2																		15.564	12.817		12.817
				405.5	161.5		198.5			113.5	315.812	212	999.7	91.5	103.188	7.8	176	36			37.2	205.3	30		539.9	223.2	454.4	32.8																		23.804	31.433		45.166
				29.9	844.4		51.8			79.5	767.5	1389.9	318	35.1	437.688	114.3	538.219	156.375			191.9	141.7	1373.2		242.5	81.1	179.9	60.7																		5.493	13.733		37.231
				451	1059		284.1			505.5	892.875	51.7	179	41.3	177.812	111.8	550.094	492.875			127.7	356.1	183.4		94.1	581.8	111.2	55.5																		20.447	12.207		20.752
				93.4	1328.7		404.5			44.7812	695.406	556.3	174.5	52.4	422.375	42.7	188.312	71.75			66.3	35.1	177.3		67.6	613.9	60.8	126.2																		12.817	18.311		28.687
				77.7	1087.4		329			488.719	232.219	21.3	546.8	64.9	8.3125	14.1	657	16.375			323.8	438.6	122.4		454.4	46.6	54.3	80.9																		29.907	14.648		24.414
				275.1	31.7		175.3			200.781	184.5	147.9	28	43.8	344.312	34.7	223.375	123.25			303.6	222.6	583.2		151.5	144.5	156.1	91.4																		14.343	17.7		15.259
				22.9	1027.9		282.1			61.3125	898.688	42.4	24.6	36.1	25.5	11.8	78.8125	132			212	436.3	53.4		141.8	96.9	175.1	68.4																		7.019	16.785		27.771
				201	993.3		24.7			329.812	94.5938	634.3	267.5	77.2	186.375	142.9	213.812	112.125			207.1	266.7	280.9		1353.9	206.6	86.8	67.6																		28.687	15.259		34.485
				68.5	114.3		184.2			204.282	39.5938	300.7	66.3	15.3	466.25	82.6	414.5	74			39	392.3	334.4		487.5	81.6	36.7	74.5																		15.259	22.583		34.79
				124.9	434.7		273.4			95.5933	583.312	54.8	469.8	74.1	637.375	16.4	154.375	161.375			388.2	348.2	718.9		277.1	91.7	115.9	69.4																		10.071	19.531		10.681
				467.6	50.3		568.5			590.219	626.5	257.1	65.7	15.3	196	80.9	69	8.125			197.8	47.1	397.9		289.4	176.7	83.9	18.8																		19.226	39.368		26.855
				165.9	10.7		281.3			266.5	470.406	359.7	667.2	68	137.312	46.3	90.8125	109.125			416.9	474.7	1820.7		334.1	80.5	231.2	163.1																		7.324	14.343		29.907
				77.3			17.4			207.5	504.688	397.3	1304.8	19.3	41.375	10.2	163.812	36			96.4	527.5	721.1		43.9	101.7	87.5	36.4																		13.123			17.395
				197.6			203			194.094	471.594	887.6	304	94	70.9375	43.2	167.188	59.125			339	28.4	1120.7		1252.8	248.3	33.6	214.9																		11.597			30.212
				339.8			213.2			269.594	138.625	251.8	434.2	27.7	265.5	10.8	93.5	39.75			314.8	413.9	31.1		260.8	174.2	734.1	91.7																		7.935			20.447
				123.1			39.4			260.218	31.0938	204.9	944.3	133.5	148.062	53.8	264.906	281.75			56.3	171.1	456.2		248	6	169.7	38.7																		24.719			10.986
				59.2			52.1			127.5	44.2812	73.2	89.6	79.2	402.312	66.4	0.6875	104.75			35.7	295.6	488.7		201.7	491	16.2	69.2																		7.629			20.447
				228			62.3			184.094	269	291.5	68.3	30.8	220.812	27.6	66.9062	36.125			237.3	60.9	406.1		85.8	188.7	104.7	133.7																		14.954			12.207
				350.7			104.9			78.188	347.812	157.8	41	43.9	569.875	69	214.094	202.75			142.4	204.5	1088.4		321.7	96.5	52.6	42																		11.902			17.7
				297.8			40.8			207.312	811.5	1117.1	135	17.7	202.938	234.1	201.906	89.875			208.4	142.9	567.4		644.6	198.5	348.4	95.4																		35.095			16.785
				48.6			223.7			326.906	281.812	27.6	110.4	35.2	79.5625	79.4	0.90625	108.625			58.6	340.2	52.6		45	193	39.8	94.6																		29.297			32.349
				157.5			59.4			336.782	40.0938	172	368	101.9	130.938	27.4	273	59.875			60.7	553.2	737.7		63.6	47.2	106.6	83.6																		19.531			39.368
				396.2			72.4			379.406	0.59375	91.9	1420.9	67.3	283.25	79.6	412.406	41.625			148.5	1216.5	269.2		234.8	92.1	110.3	42.4																		7.019			47.607
				398.4			86.6			33.1875	55.5	606.9	60.1	24.7	152.812	104.5	66	313			206.8	45.1	80.8		274.6	243.9	40.7	148.1																		14.648			24.109
				414.5			92.6			46.2188	167.312	189.1	919.9	26.5	146.125	293.8	171.375	69.375			310	139.2	684		171.8	78.2	31.3	69.1																		10.376			11.292
				156			172.3			93.7812	296.188	89.6	260.7	166.7	211.875	471.1	750.719	189.875			72.2	41.2	133.2		46.8	312.5	44.6	45.6																		30.823			23.804
				18.7			113.2			117.125	155.5	384.3	812.6	61.6	289.938	134.9	61.5	102.5			91.4	362.7	33.9		113.5	180.6	19.4	11.8																		19.226			21.667
				90.3			18.5			28.6875	636.812	58.5	662.1	64.7	254.062	84.4	95.7812	120.625			29.7	244.8	236.1		177	157.6	397.5	24.4																		5.798			17.395
				323.3			28.6			326.406	193.875	443	394.4	31.5	40.1875	35.1	447.406	37			293	217.9	351.2		107.1	87.2	18.3	95.8																		9.46			43.64
				244.4			535.5			19	146.5	694	462.7	106.9	15.75	5.8	160.719	93.5			95.7	11.3	149.1		1017.4	13.7	23.1	103.9																		21.667			47.607
				269			164.1			184.094	282.812	486.4	993.6	16.3	39.0625	563.4	37.875	76.125			296.1	128.4	862.2		321.1	268.3	119	49.8																		16.174			27.771
				32.2			183.3			149.5	511.094	106.5	1036.1	151.2	63.8125	335.4	84.125	494.375			224.3	211.1	60.5		367.7	142.2	156.8	35.9																		15.564			20.752
				26.7			58.6			1236.41	132.906	872.9	321.6	79.5	183.312	78	103.375	66			89.9	358.8	229.4		351.5	205.6	109.4	30.7																		26.245			20.142
				497.7			428.7			459.688	130.406	639.5	22.5	42.9	63.6875	226.5	305.625	70.5			37.9	29.4	616.2		562.2	371.7	11.3	113.3																		16.785			31.128
				23.2			115.1			443.812	316	1186.1	77.4	143	267.875	57.9	120.875	148			92.4	157.2	871.1		211	83.5	11.2	36.2																		16.174			14.038
				948			118.4			377.906	232.688	542.5	893.3	46	223.25	187	354.719	281.75			337.8	225.6	1329.5		336	6.8	154.6	64.6																		8.545			33.875
				181.2			22.7			228.5	57.406	63.9	91.1	90.6	396.875	138.3	72	567			30.5	378.2	211.9		246.1	157.9	72.8	19.1																		17.395			18.005
				192.4			56.2			123.375	300.906	138.1	152.6	10.1	409.812	146.9	46.5938	393.75			25.2	375.2	195.4		2280.2	72.4	171.4	65.6																		22.278			21.667
				795.9			64			118.812	47.9062	75	649.6	155.4	272.062	50.8	1.40625	42.875			329.7	138	136.8		656.4	74.7	202.7	39.6																		7.629			27.771
				50.1			100.3			166.688	53	1156.5	200.8	42	34.5	189.5	117.594	93			69.1	123.7	589.2		312.8	58.5	16.7	44.2																		21.362			18.005
				369.3			33.7			256.312	34.5	556.7	75.3	19.8	31.125	29.1	118.406	401.25			20.7	1008.7	70.1		665	854.6	171.8	26.5																		12.817			14.648
				149.9			318.1			312.188	218.375	164.5	81.5	13.9	85.125	116.7	120	1055			71	379.6	1294.1		0	32.3	90.4	85.1																		6.409			20.752
				27.4			78.2			305.312	16.625	606.2	153	23.4	80.5625	117.5	64	206.5			89.2	1330.9	914.6		1.4	430.4	397.2	23.7																		7.629			13.123
				268.7			1.2			347.5	135.5	147.2	799.9	46.8	385.5	107.7	75.6875	511.375			340.6	76.8	802.5		506.1	193.6	386.9	11.1																		9.766			18.921
				238.2			158.5			125.594	232.094	1135.4	359.2	74.7	420.938	114.2	244.219	834.5			154.5	9.6	446.8		85.3	33.2	27.1	31.2																		11.292			10.681
				169.9			189.8			383.5	210.094	218	149	11.7	150	96.5	332.594	171.5			598.9	116.8	270.7		350	721.3	202.3	59																		5.493			12.817
				21.9			366.7			182.812	169.688	45.8	1066.6	98.2	224.75	58.7	91.2812	118.25			81.6	243.2	328.3		302.8	299.4	118.2	98.6																		32.959			32.959
				649.8			119.7			421.406	444.219	412.4	41.1	73.4	54.3125	1113.3	200.219	146			105.2	358.9	187		123.4	263.5	11.8	29.8																		25.635			10.986
				441.8			240.9			217.781	0.40625	413.2	132.5	17.9	50.9375	0.5	147.406	77.75			70.3	17.4	320.5		59.7	106.9	171.4	225.4																		5.798			14.954
				218.1			72.1			442.594	324.688	1696.5	318.1	15.5	44.75	17.5	284.281	77.625			18.9	145.2	337.4		343.6	119.3	166.6	95.3																		6.714			33.569
				123.1			40.3			75.625	723	83.5	126.3	179.4	91.9375	9.4	152.094	378.5			53.3	92.6	225.1		107.1	210.2	527.8	212.3																		31.433			14.954
				136.5			122			61.875	544	272.3	464.9	54.2	37	110.2	185.312	529.625			73	51.6	290.6		807.4	826.3	41.1	137.9																		24.719			11.597
				263.2			43			633.219	173.406	64.1	153.1	62.6	61.8125	423	196.812	986.375			17.9	351.9	522.1		563.4	105.3	184.2	19.4																		17.395			19.226
				37			50.4			117.406	98.2812	123.8	1971.3	56.9	200	58.1	345.875	305.375			157.4	78.7	322		494.2	85.1	127	17.2																		16.785			27.466
				38.8			427.5			22.5	59.9067	609.9	87.1	45.8	347.688	19.8	237.406	57.375			284.8	76.8	374.1		236.1	77.8	67.4	98.2																		12.817			17.395
				89.1			411.5			207.594	398.093	1496.8	436	133.3	142	55.8	50.9062	165.875			84.8	180.4	165		188.4	81.7	67.9	144.2																		13.428			14.954
				9.8			16.1			741.594	77.3125	469.3	46.1	108.4	892.188	286.1	159.5	80.75			69.5	80.3	143.9		518.8	325.7	36.7	35.8																		10.681			20.142
				98.1			298.7			318.688	224.312	383.9	1066.8	98.5	55.1875	84.1	57.5938	583.125			75.7	22.6	364		126.3	733	84.3	4.7																		28.992			11.902
				98.8			285.8			38.4062	185.094	417.1	186.7	64.4	226.312	57.5	270.219	50			19.2	180.3	20.7		35	64.6	97	19.1																		7.935			28.992
				99.2			80.9			278.906	405.781	26.4	1240.3	65.1	31.875	21.7	224.875	193			22.4	133.6	306.5		302.8	462.6	10.9	60.5																		5.798			18.616
				390.2			124.7			127.906	349.625	341.9	37.2	44.8	62.9375	638.5	40.4062	305.75			125.4	16.2	108.6		79.3	12.9	344.2	16.1																		13.123			16.479
				206.5			28			51.7812	699.688	38.7	672.4	67	20.875	94.2	0.3125	142.75			51.1	92.4	432.2		442.7	56.7	56.4	23.8																		17.7			44.25
				206.9			167.6			464.219	33.5942	1278.4	915.2	42.3	68.9375	13	0.40625	787.875			179	195.9	62.9		26.7	203.1	80.4	134.6																		11.902			14.648
				262			485.5			188.188	180.218	497.6	345.4	130.4	237.25	138.1	375.188	98.375			682.8	106.3	131.1		47.6	45.2	49	67																		20.752			22.278
				463.5			31.8			238.312	89.0938	634.9	672.2	42.7	348.25	146.2	52.4062	696.625			16.5	328.2	21.4		100.3	362.2	254	12.8																		17.395			15.869
				30			131.9			12.5938	0.687988	267.4	324.7	62.8	153.188	37.4	200	78.625			118.9	87.9	185.4		203	359.8	137.1	83.2																		7.629			21.362
				87.8			246			87.9062	76.5933	93.1	127.2	125.5	107.562	493.9	185.594	120.625			634.4	216.4	420.7		353.6	97.4	175.9	10.3																		11.597			29.907
				166.9			143.8			91	0.71875	731.2	90.5	113.3	90.8125	77.4	107.5	75.875			506.8	20.6	23.7		0	215.6	18.9	20.9																		9.155			21.667
				274.4			251.2			1226.59	231.188	164.3	249	74.7	142.625	232.3	300.094	1318.12			17.2	332.8	183.9		173	153	70.9	26.7																		25.635			13.123
				749.5			178.3			411.406	426.218	273.3	260.4	149.2	92.5625	77.9	305.219	180			556.5	189.3	282.8		298.5	256.6	244.1	27.9																		13.428			13.733
				260.3			59.7			45.4062	676.594	36.9	422.6	160.3	188.438	111.7	197	57.25			108	182.5	384.6		228	136.5	273.2	150.5																		9.155			22.888
				64.5			378.7			404.5	71.7812	774.4	564.4	40.7	332.375	68.5	312.5	528.625			248	273.5	608		1113.5	55.4	333.7	42.2																		8.24			22.278
				451.4			21.7			80.2812	200.219	41.8	295.1	98.5	8.5	618.1	166.094	435.625			35.5	236.1	266.3		630.8	64.1	19.7	84.3																		26.855			17.395
				222.8			109.7			117.406	669.688	2016	119.5	24.1	14.1875	240.1	8.6875	338.75			608.9	65.1	1140.2		263.4	148	23.7	24.2																		8.85			33.264
				303.1			271.4			648.406	0.40625	205.3	65.5	31.9	14.9375	100.1	113.719	270.5			51.3	36.5	1282.6		443.2	34.3	197.5	71.8																		10.071			17.395
				108.8			55.7			520.406	136.188	39.6	616.6	74.6	90.8125	11.9	191.375	551.375			90.4	146.8	44.6		74.4	74.3	17.9	78																		30.823			38.452
				687.3			26.4			45.6875	175.719	75.7	122.7	191.5	140.062	73.4	246.312	33.625			291.5	10.9	244.8		331	203.9	219.6	56.6																		28.076			10.681
				967.4			122.2			446.312	119.281	91.4	283	57.1	28.1875	230.7	116.406	52.625			110.7	266.8	1678.3		1196.6	188	761.7	22.8																		14.343			13.733
				99.2			324.8			38.2812	87.3125	244.4	774	117.2	308.5	315.3	158.688	280.5			75.5	291	498.7		463.8	13.8	111	36.6																		14.038			20.752
				400.4			50.4			120.219	468.312	326.9	97.6	48.2	45.9375	120.5	1106.59	118.375			340.6	117.1	88.1		1209.1	269.8	325.4	181.7																		20.447			15.869
				183			207.3			120.375	214	182.9	445.4	31.2	70.8125	71.8	95	38.5			24.1	38.6	65.1		48	74.1	109.7	43.8																		13.123			22.583
				199.9			150.8			69.7188	143.875	1771.2	61.9	57.8	106.562	86.7	474.906	261.375			670	163.9	1844.7		37.3	704.8	20.5	219																		8.85			20.447
				273.7			48.9			530.688	429.906	274.5	68.3	67.4	158.625	199.9	104.594	958.625			318.1	103.4	571.5		936	111.1	66.1	99.2																		21.973			25.024
				90.4			39.5			406.812	468.5	112	40.3	52.1	242.688	272.4	143.312	690			74.9	358.6	325.1		88.9	509.8	47.4	56.9																		50.049			57.983
				141.3			429.6			106.406	438.812	436.5	351.2	44.1	175.875	198.1	252.312	479.25			61.8	161	1001.1		227.4	691.1	40.7	151.8																		16.785			18.616
				31.4			287.6			52.5	118.781	57	61.3	77.5	47.4375	48.8	80.375	654.5			173.6	139.7	496.7		240.8	234.5	76.8	21.2																		18.921			11.597
				431.4			17.2			311.188	69.3125	36.9	27.9	38.3	65.3125	452.4	45.2188	792			19	166.8	404.7		246.4	260	155.2	101.4																		22.278			28.992
				52.9			434.5			143.594	103.094	167.5	539	132.7	31.5625	207.2	208	89.375			114.1	33.7	278.1		448.2	351.9	51.7	50.3																		61.951			29.907
				145.5			160.2			57.2188	168.406	156.8	385.2	163.8	154	29.8	235.688	122.375			175.4	939.2	712.2		127	131.8	32.1	28.3																		11.902			13.123
				57.6			384.4			387.281	178	296.1	226.8	258.1	66	547.1	159.406	267.125			38.5	235.8	117.6		198.1	12.5	32.6	35.2																		14.954			12.207
				751.4			642.8			35.5938	466.906	115.9	48.9	18.8	29.625	417.9	43.9062	71.875			394.8	62.6	17.8		665.1	155.3	81.5	50.9																		17.395			16.479
				26.1			44.6			1004.5	322.781	203.5	242	50.6	192	193.1	416	87.875			103.7	400.4	402.9		257.3	587.8	98.5	84.9																		11.902			31.738
				166.5			190			334	124.312	451.7	137.4	15.6	161.312	54.2	62.2812	178.625			270.9	23.7	893.4		401.8	474.8	77.3	150.6																		13.428			15.564
				86.1			108.1			640.312	278.906	206.8	1001.4	57.7	307.562	363.7	240.125	292.875			32	405.1	774.6		44.9	140.8	120.9	74.4																		18.005			54.016
				54.9			462.6			318.594	84	469.4	254.9	53.4	77.3125	493.8	118.781	799.5			27.2	234.4	1021.6		316.9	633.3	85.6	19																		7.019			14.343
				760.5			74.7			30.7188	511.5	507.1	158.6	127.5	210.625	65.5	108.812	281.625			211.5	88.5	20.4		269.1	14.3	73.7	132.1																		14.038			14.343
				784.7			283.5			317.281	39.4062	1043.8	21.1	110	518.062	174	146.5	112.375			100.8	189.1	647.6		309.7	527.1	52.6	84.4																		10.986			23.804
				634.5			36.9			294.219	68.5938	45	163.8	39.8	22.625	7.7	251.781	731.125			85.5	94.1	140.4		342.5	103.6	158.8	37.2																		12.512			13.428
				460.5			255.4			178.594	361.281	465.9	284.9	89.7	251.188	512	76.5	812.25			142.8	144.5	829.8		89.3	58.6	16.1	36.6																		6.714			50.659
				130.4			66.4			289.594	47.7188	1250.8	1292.6	161.9	221.125	29.1	96.594	111			524	91.4	25.3		48.4	256.3	36	369.4																		26.245			21.057
				78.6			175.8			200.906	92	195.4	45.7	109.6	263	35.7	0.218498	207.375			75.5	348.2	2478.9		83.8	255.9	99.9	108.5																		6.714			14.038
				591.3			498.7			49.0938	478	28.9	323.8	75	75.5	264.2	1.0937	97.375			80.7	29.9	409.6		121.7	1020.9	85.3	41.8																		13.733			16.174
				159			142.5			199.312	84.5	221.1	560.7	159.3	341.75	107.3	0.687805	120			212.7	87.2	105.2		55	112.4	142.5	101.6																		11.292			28.992
				62.8			185.7			55.375	52.7812	272.8	58.8	62.5	162.438	32.8	150.812	321.625			254.2	499.8	52.2		316	96.4	77.2	76.7																		7.019			11.902
				113.9			377.3			12.4062	51.7188	213.4	303.3	34.4	96.6875	62.1	1.5938	45.25			46.8	382.9	76.8		794.8	563.9	379.5	59.1																		13.123			12.817
				743.3			277			184.594	284.688	607.3	276.7	76.3	106.5	251.9	71.6875	329.625			104.3	210.5	43.2		81.7	88.2	262.2	25.2																		8.24			25.024
				1232.8			27.7			232.406	210.594	627.4	212.2	56.7	208.625	24.6	202.219	289			382.3	47.4	240.5		473.9	41.1	86.5	14.3																		10.071			22.888
				8.5			37.6			83.2188	304.812	874.4	187.1	83.4	37.375	228.2	92.2813	145.25			273.2	348.3	289.3		854	65.5	24.3	56.5																		18.616			31.128
				64.9			455.8			138.594	50.9062	178.9	1041.6	43.8	263.688	48.2	628.625	171.625			105.8	376.4	620.7		439.3	91.4	53.3	85.4																		6.714			27.466
				33			10.4			105.781	532.906	109.9	1019.2	51.7	40.9375	21.8	202.594	276.5			19.8	126.5	392.3		1141.2	64.6	153.3	173.2																		5.798			20.752
				242.2			260.5			67.7188	895.281	295.2	93.7	130.3	364.375	69.5	309.281	291.125			67.7	78.2	137.7		250.4	129.7	214.3	196.5																		34.79			30.212
				183.1			92.6			79.2812	338	177.9	741.4	116	12.125	162.7	64.4065	246.375			26.5	382.3	270.6		262.7	187.2	52.6	14.6																		23.499			11.902
				70.2			5.9			133.625	301.5	208.6	144.9	44.9	50.375	170.6	178	397.875			42.9	273.7	956.1		0	132.4	10.6	14.8																		7.324			12.207
				437			255.3			154.375	455.406	904.8	49.5	57.2	68	42.8	258.219	137.375			79.9	161.9	160.5		974.6	483.6	29.7	28.5																		17.7			15.259
				273.3			249			67	282.094	35.6	93	73.8	82.875	37.4	174.094	239.875			131	38.4	1009.2		241	51.8	55.3	35.7																		18.005			17.7
				154.6			25.3			284.5	65.2188	107.9	141.7	223.4	74.25	76.6	346.5	407			89	754.7	57.4		802.5	66.4	29.7	151.5																		15.564			11.292
				217.3			68.9			538.312	429.875	211	181.5	19.3	392.375	78.7	371.906	289.5			109.7	30.7	59.1		396.1	472	112	123.1																		15.869			11.597
				69.8			375.8			435	249.406	364.5	73.2	43.5	100.125	192.1	185.5	170.25			636	129	955.8		354.1	284.2	8.2	39.3																		23.193			30.212
				241.7			35.6			49.9062	90.8125	211.5	29.4	139	144.25	104.6	171.375	170.125			699.7	232.9	478.7		615	183.2	19.2	56																		28.076			15.869
				171.8			812.4			139.594	53.1875	103.5	154.1	73.6	143.438	186.5	1.40649	468			310.5	22.6	248.6		514.7	164.7	140.1	77.3																		14.648			50.049
				273.5			421.6			525.5	119.5	114.6	641.4	46.5	27.5625	36.2	250.5	67.375			58.9	402.2	672.5		167.9	0	171.2	33.6																		14.038			11.292
				266.7			25.5			235.094	116.906	592.7	385.2	33.8	22.25	124.2	79.3123	79.25			249.6	22.3	168.5		68	83.1	191.7	49.7																		23.804			11.902
				34.2			80.3			38.3125	54.5938	205.8	680.9	67.1	39.6875	350.7	37.4062	337			316.4	372	132.7		1273.4	317.6	43	28.8																		10.071			37.537
				10.5			198			357	36.0938	572.7	285	163.3	41.6875	205.8	92.875	34.25			563.2	97.5	38.3		151.1	148.4	193.2	54.2																		9.46			38.757
				117.2			259.3			559	301.5	263.7	552.3	60.4	112.5	345.1	291.219	324.75			107.8	81.6	1385.3		37.2	1032	45.5	77.9																		20.142			34.79
				359.3			361.4			580.906	275.906	164.3	21.4	100	248.812	51.2	193.188	207.375			126.9	96.1	178.1		404.4	620.1	45.3	65.4																		37.231			11.902
				225.6			61			64.6875	889.219	723.4	211	51	130.812	17.6	117.718	56.125			26.7	276.4	46.1		347	946.6	13.2	15.6																		6.104			12.207
				140.8			170.7			40.8125	723.188	310.3	125.1	120	175.562	182.7	132.094	74.75			36.6	254.3	36		323.2	524.8	61.7	38.5																		21.667			26.855
				369.9			97.5			321.594	97.9062	941.3	112.8	66.5	329.125	151.6	130.281	139.75			26.5	124.3	69.8		604.2	166.9	239.9	37.7																		10.681			11.597
				41.4			165			821.688	424.094	117.6	377.6	81.4	68.375	493.6	70.7188	17.625			225.6	292.1	590.7		20	38.9	31.1	17.9																		22.278			106.201
				316.8			127.8			355.312	90.0938	66.7	51.9	55.7	43.8125	87.8	284.906	166.875			26.4	17.8	914.2		683.7	142.1	132.3	13.7																		8.545			14.954
				221.9			128.7			178.781	528.312	134	505.5	37.1	275.5	51.8	56.5938	99.625			136.4	14.5	973.7		740.3	317.5	88.7	35.9																		50.964			51.27
				3.6			351			118.406	870.094	389.1	352	57.4	30.625	51.3	86.688	60.875			131.9	286.7	559		1801.1	64.7	224.7	62																		33.264			37.231
				280.2			135.3			79.0938	224.812	1076.8	88.7	70.2	82.1875	57	1.31201	598			127.9	177.3	478		120.1	92.8	39.1	8.1																		10.681			20.142
				171.4			29.5			0.21875	114.188	1087.2	17.6	128.8	96.5625	38.2	100.188	248			510.7	68.1	39.4		200.5	526.6	323.9	24.1																		9.46			38.452
				94.2			52.4			141	145	1363.2	1111.8	73.8	70.75	12	99.4058	33.5			194.5	33.9	523.4		108.2	292.2	133.4	121.9																		5.493			17.395
				169.5			131.6			329.688	113.812	30.7	31.6	41.8	227	24.3	157.5	65			256.5	57	191.3		257	388	142.6	148.7																		6.409			22.583
				222.8			53.8			552.219	76	72.7	219.9	28.6	289.562	31.7	67.6875	74.875			311.9	143.4	409.8		217.3	169	141.3	73.3																		16.785			13.733
				68			85.2			125	212.188	287.1	64.7	85.8	28.9375	299.2	69.4067	134.75			71.9	162.2	125.8		145.8	186.6	287	258.9																		22.583			28.687
				131.4			50.6			474.281	796.188	142.4	388.3	24.9	213.5	70.4	0.812012	1251.38			110.9	347.9	110.2		457.5	309.9	55.9	37.1																		14.343			11.292
				30.4			17			107	103.5	124	331.8	30.1	29.75	131.1	99.4062	33			212.7	211.2	199.6		398.8	149.1	146.2	6.9																		9.155			17.395
				187.3			28.7			296.906	386.125	192.3	152	66.9	226	285.3	92.375	223.875			329.7	48.4	178.2		149.9	306.1	42.7	263.4																		10.986			11.902
				156.2			185.8			517.094	205.594	29.3	85.6	281.3	77.3125	51.6	44.4067	81.5			507.8	953.1	80.6		1188.5	228.4	8.8	15.4																		10.376			10.681
				157.1			140.9			181.219	169.906	542.5	225.4	51.8	218.312	75	0.405762	811.375			198.7	46.3	668.4		89.2	145.8	10.8	71.5																		15.869			15.259
				177.3			209.6			363.375	951	283.2	100.8	80.2	236.5	586.4	137.812	178.375			674.6	522.3	988.7		86.4	236.5	93.7	16.8																		20.142			27.466
				92.1			43.7			214.625	584.281	155.3	427.7	49.3	28.1875	13.9	145.282	587			283.5	65.6	67.7		40.6	75.2	57.5	67.5																		11.597			28.381
				389.1			125.7			197.281	132.094	231.3	83	25.2	55.9375	491	17.4058	139.625			635.7	751	128.9		377.6	35.3	19	36.9																		14.648			11.902
				28.9			142			669.219	827.125	309.7	532.2	69.1	147.688	89.8	309.5	335.5			91.7	200.5	446.3		395.2	112.6	180	72.4																		11.597			14.343
				79.9			170.7			38.1875	174.188	75.5	228.8	51.2	95.0625	304.6	184.312	401.25			209.5	9.2	236.3		97.6	57.6	27.2	32.8																		14.954			24.109
				98.2			46.8			559.906	66.1875	105	484	62.4	36.625	73.8	217.282	245.75			244.6	37	89.9		573.8	50	30.2	23.1																		7.935			16.479
				99.3			33.7			521.188	482	332.3	306.9	82	359.625	68.1	33.312	57.875			607.3	848.1	50.4		297.9	52	392.5	94.2																		9.155			12.817
				342.1			209.7			1000.91	128.312	336.7	276	24.8	18.1875	249.3	164	452.875			11.5	110.3	67.5		814.4	161.2	91	85.9																		6.714			12.207
				94			182.4			253.406	556.5	80.4	419.6	144.8	76.875	181.3	163.094	138.625			15.7	317	92.1		486	56.6	206.7	36.2																		9.766			10.681
				289.5			309.6			709.906	77.8125	291.3	222.1	44.7	169.688	216.1	281.594	446.25			60.8	470.1	152.9		143.4	37.8	15.1	13.3																		8.85			10.681
				277.7			137			335.594	61.6875	393.4	155.4	72	73.125	9.1	208	206.625			710.5	313.5	530.9		260.9	34.4	39.2	39.8																		11.597			12.512
				121.9			32.5			239.594	156.906	51.8	153.8	102.5	194.375	114.3	117.5	64.5			11	41.6	395.9		125	114.8	171.5	31																		6.104			38.757
				172.5			285.1			34.4062	32	352	131.1	80.6	51.8125	160.5	65.9058	111.75			776.2	164.5	488		148.8	71.9	256.1	58.3																		7.629			18.005
				126.7			46.2			181.406	359.094	874	131	68.8	244.688	197.6	47.6875	154.375			88.7	217.3	361.9		76	19.6	43.2	46																		9.155			22.583
				331.9			317.5			190.688	373.312	59.7	79.9	154.8	179.25	258.7	198.5	149.625			90.9	496.7	316.4		117.8	14.1	106	25.1																		9.155			22.278
				77.3			60.9			290.688	269.094	255.8	164.5	167.8	93.5	287.2	387.719	141.25			114.1	552.6	834.6		237.6	0	144.7	121.3																		10.376			10.681
				598.6			447.2			59.8125	743.094	125.9	199	144.1	161.688	31.2	452.781	397.625			421.1	218.6	981.9		479.7	37	313.7	34.3																		11.902			18.005
				85.3			247.4			107.312	62.9062	185.3	220	111.6	178.312	432.9	82.4062	9.875			185.8	40.1	260.1		93.6	12.1	332.8	70.6																		22.888			17.395
				149.6			685.9			142.594	196.906	137	120.1	134.5	53.0625	1.3	43.5938	375.875			290.3	167.2	75.8		94.1	151	121.8	53.5																		21.667			11.597
				881.1			21.8			145.688	837.875	332.8	30.5	47.8	53.4375	116.1	0.21875	53.875			600.5	223.3	354.6		414.3	81.1	233.6	27.4																		7.019			34.485
				366.2			26.3			283.5	631	271.2	47.9	20.4	331	217.6	71.5938	157.5			406.1	495.1	8.3		316.4	57.3	256.3	23																		37.842			28.992
				89.4			223.2			738	221.438	733.6	230.3	131.2	162.688	127.8	281.812	122			236.7	401	231.1		536.7	208.1	255.9	67.1																		17.09			21.362
				77.2			87.7			806.406	365	392.3	23.9	66.6	62.6875	69.7	235.5	356.625			592.2	39.9	1049.4		291.2	13.4	138.2	11.5																		38.757			29.907
				42.1			147.6			102.406	375	1017.5	217.3	110	697.688	173	136.781	201.25			125.9	130.7	80.2		130.4	267.9	71.6	150.7																		10.071			26.55
				475.4			510.8			715.188	597.5	75.3	246.5	74.6	19.125	101.7	302.219	65.625			147.6	146.2	96.7		123.1	27.5	101.6	24.2																		15.564			24.414
				69.7			50.9			83.3125	32.5	135.8	159	171.8	201.688	775.4	36	43.875			16.3	182.7	104.3		177.4	171	55	22.7																		7.935			26.245
				91.4			681			338.906	1693.19	464.3	349.9	11.5	105.188	257.2	94.5	132			151	312.9	42.6		129.7	29.9	54.2	7.7																		50.964			35.706
				290.8			1.7			50.5	900	1086.3	56.4	64.8	24.3125	54.3	106.281	180.375			290.1	75.2	1726.7		635.4	81.7	70.5	26.9																		9.766			42.114
				262.9			212.6			50.0938	890.062	202	32.5	53.7	81.1875	168.6	173.312	98.25			211.4	75.8	300		244.3	58.4	79.3	41.7																		25.33			30.823
				162.8			228			216	202.312	529.3	61.4	198.4	43.125	22.8	68.5938	119.25			112	142.3	42.1		53.4	256.6	24.5	16.8																		12.817			10.986
				134.7			658.5			202.281	473.938	115	179.1	37.5	99	134.2	19.1875	51.5			130.1	225.5	479.9		152.5	288.2	170.6	66																		22.583			54.321
				80			76			741.906	33.5	1322.6	123.2	47.1	432.062	387.8	145.312	411.5			619.2	328.1	182.4		374.2	10.2	16.3	27.8																		19.226			39.063
				181.6			105.3			184.719	277.562	278.5	102.7	130.4	50.3125	295.9	230.094	253			49.6	666.9	295.6		126.7	13.2	40.5	51.2																		10.376			10.681
				91.7			13.2			299.594	33.5	334.3	573.2	114.2	6.4375	200.2	1.21875	162.5			346.2	29.4	534		461.8	81.2	246	24.9																		16.479			12.207
				153.6			47.7			199.5	344	590.9	381.3	66.6	63.1875	324.9	264.875	83.875			195.3	100.3	85.1		621.5	428.1	35.5	163.8																		21.362			10.681
				411.2			30.4			416	58.3125	19.3	104.4	15.3	58.3125	101.1	82.4062	205.5			216.3	806.2	124.4		393.9	57.6	49.8	45.2																		6.714			25.024
				60.8			226.2			44.5	204.688	771.1	184.2	43.6	578.875	117.8	121.094	82			232.1	261.9	18.7		14.5	213.2	153.1	33																		7.019			11.292
				39.3			100			170.594	506.688	173.4	470.1	16.5	57.6875	66.7	213	106			223	315.5	816.5		145.2	87.9	47.6	33.9																		12.207			24.414
				447			71.3			140.594	236.625	73.5	265.2	195.5	33.125	249.9	107.5	241.75			519.5	208.9	353.3		572.4	106.7	152.5	66.4																		13.123			16.479
				26.7			12.6			830.219	58.625	666.1	122.3	99.5	103.688	194.6	68.125	94.875			128.9	678.8	995.2		530.7	109.8	141.4	89.5																		12.817			10.681
				138.1			99.7			806.094	592.25	311.2	186	215.2	52.1875	29.5	53.2812	216.375			44.9	68.3	259		22.4	130.5	60.5	33.1																		23.499			12.512
				185.5			65			135.5	267.5	180.5	72.4	72.6	457.5	877.4	322	87.875			910.3	1269.5	79.9		22.2	19.4	85.7	17.3																		34.79			11.597
				624			205.3			372.594	236.625	95.8	434.6	23.2	139.688	319	206.812	338.125			241.8	605.1	33.3		215.8	327.6	113	43.9																		35.4			10.986
				393.1			80			447.812	254.5	797.3	247.3	64.7	120.812	91.2	322.688	20.125			458.1	146.4	48.1		97	145	87.3	18.7																		20.142			26.855
				109.8			397.9			50.5	331.688	68.2	636.7	97.7	261.625	52.1	376.812	119.875			24.7	559.7	11.7		284.1	415.5	138.5	11.2																		6.104			12.817
				212.7			265.6			512.188	871	1089.9	470.9	25.9	23	314.2	135.906	876.875			295.7	297.1	950.5		286.7	198.5	26	21.5																		7.935			13.123
				488.8			49			74	91.1875	223.8	14.6	15.9	84.875	70.3	10.0938	195.75			108.1	97.5	36		60.1	72.1	312.8	12.9																		12.512			42.725
				162.5			29			746.406	201.812	21	263.8	22.6	38.125	59.1	451.594	55			62.8	42			158.9	81.2	49.4	113.6																		22.888			31.128
				344.5			36.2			666.5	186.438	92.8	276.8	30.6	394.062	312.4	27.5938	28.375			137.7	95			39.9	24.5	55	34.8																		23.804			54.016
				431.3			127.3			107.906	39.0625	384	98.4	87.6	87.3125	377.2	292.812	577.875			64.2	32.3			61.6	286.9	47.1	17.5																		15.259			24.719
				205.8			85.9			263	182.438	809.9	63	49.4	125.688	21.6	174.5	118.625			112.5	187.8			11.6	292.8	251	20.8																		10.376			25.94
				549.3			122.6			88.5	500.188	193.4	353.3	328.5	203	59.7	236.5	433.5			109.7	363.8			36.8	24.6	56.8	40.8																		19.531			11.902
				132.4			96.5			1076.5	363.188	417.3	823	21.9	180.25	430.3	184.594				77.8	395.7			294.4	36.3	241.3	118.9																		19.226			31.433
				424.1			0.7			162.5	94.375	47.3	381.7	19.2	279.688	88.5	1.09375				57.6	73.3			71.2	541	77.3	17.3																		13.733			32.959
				685.3			16.9			158.875	365.812	329.5	110.2	79.1	74.5	67.8	0.59375				115.4	52.3			364.1	304	427.3	14.2																		7.935			31.433
				28			318.7			139.5	146.938	337.4	237.8	54.5	43.3125	113.5	82.8125				67.8	129.7			59.8	0	101	39.9																		17.09			15.259
				39.6			206.2			0.593994	392.688	198.8	25.5	135.1	44.1875	66.6	356.906				365.5	55.2			45.7	33.1	21.2	33.6																		14.343			18.005
				121.4			445.7			631.718	489.875	935	33.6	112	228.812	97.9	33.2812				219.9	354.9			243.8	233.6	258.4	189.9																		18.311			19.836
				35.5			86.2			193.781	116.938	49.4		29.4	62.6875	208.8	480.812				68.2	443.3			264.6	223	43.6	10.3																		14.648			28.687
				72.2			320.5			762.093	25.0625	192.5		201.7	21.3125	84.2	269.906				44.5	112.9			46.1	56.8	302.2	12.7																		35.4			14.343
				121.4			29.4			243.406	117.188	20.1		192.9	139.062	224	138.094				820.8	232.4			89.3	36.2	29.2	9.9																		20.142			11.597
				53.2			74.7			141.406	293.938	43.6		141	229.188	132.4	216.688				492.8	569.8			132.3	161.9	220.1	60																		8.85			21.973
				123.5			251.5			119.5	230.188	359.4		415.6	33.125	78.9	132.312				120.4	82.1			251.5	47.4	115.8	28.4																		13.123			15.869
				318.7			323.5			2086.91	372.688	99.4		85.1	135.812	68.8	163.406				78	923			327.8	146.2	17.9	6.9																		14.954			10.681
				159.1			93.9			60.7812	49.625	270.8		41.9	260.188	435.2	186.094				54.8	70.9			126.4	74.3	154.6	27.9																		5.798			14.648
				554.4			3.1			253.407	277.875	1042.2		43.3	139	116	110.188				245.8	25.9			32.5	90.4	197.8	169																		33.569			60.73
				301.8			24.6			57.2183	231.625	240.1		58.5	19.375	400.9	202				115.4	262.4			115.8	43	190.3	100.4																		24.719			12.512
				158.5			157			1182.19	76.0625	107.3		130.1	35.625	95.7	169				373.5	26.9			113.6	430	19	105.9																		14.343			30.823
				106.1			130.8			314.312	129.438	191.6		139.8	393.5	212.9	290.719				63.8	190.6			41.5	353.1	48.8	5.4																		14.343			23.499
				104.3			8			337.5	23	462.9		11.1	487.125	243.3	158.688				173.2	278			554.8	146.8	722.4	111.8																		8.545			13.428
				149.8			60.1			1129.69	940.375	611.5		141	39.0625	63	537.219				24.7	517.8			34.5	14.8	232.3	89																		22.583			10.681
				389			58.2			340.688	210.5	302.2		103.4	14.4375	213.5	0.78125				44.4	25.9			235.8	632	25.3	106.6																		17.09			10.986
				242.8			60.6			278.219	39.125	226.1		280.6	97.5625	300.2	169.719				420.2	66.6			103.3	248.1	296.2	12.6																		14.343			12.207
				276.8			247.3			80.1875	57.375	472.9		59.2	226.5	106.1	168				218.3	15.8			174.2	66.2	36.2	17.4																		14.038			32.349
				555.4			446.2			147.5	200	331.3		141.9	165.125	495.5	2.875				121.7	249.6			255.7	170.5	316.2	38.2																		12.817			11.597
				270.9			100			309.594	89.625	330.7		13.5	206.312	63.2	340.312				171.4	97.2			133.9	40.1	44.8	223.1																		15.564			14.954
				318.7			130.7			60.4062	24.6875	123.4		98.6	36.5	202.5	292.906				64.3	128.1			238.4	18.2	202.9	31.6																		9.155			11.902
				229.1			191.8			69.9062	550.188	403.3		58.3	93.5625	45.8	81.6875				534.7	256.7			95.1	40.6	146.5	40.9																		6.104			11.292
				601.7			12.1			37.0938	333.5	800.5		36.2	65.6875	463.9	0.3125				207	36			118.9	30	217.4	89.3																		8.24			16.479
				26.2			46.4			144.312	438.812	252.8		139.9	69.3125	37.6	74.0938				192.5	337.7			229.8	107.1	111.4	34																		38.757			19.531
				209.5			33.8			668.5	122.188	470.9		58.2	307	525.1	264.5				248.5	25.6			46.6	56.4	170.2	72.5																		23.804			21.667
				46.9			21.2			511.406	158.938	49.8		240	234.188	501.1	97.5				171	26.8			173.9	327.1	252.2	17.3																		25.024			35.4
				75.7			36.9			123.5	121.75	566.5		132.2	85.9375	24	14.0938				147.5	282.4			607.1	211.8	114.2	172.3																		8.24			22.583
				204.2			19.3			310.781	137.312	287.8		121.5	76.8125	230.5	1.8125				136.2	611.7			471.5	60.5	34.6	174.6																		7.935			21.973
				614.8			27			102.594	185.125	93.6		7.9	287.5	155.7	349.281				1115.5	581			48.1	170.9	169	155.6																		11.292			10.986
				71.6			136.3			489.906	763.062	433.9		51.5	157.75	103.6	1.40625				389.1	330.7			245.7	148.3	93.3	47.9																		8.85			36.011
				278.4			134.5			489.812	58.9375	471.4		116.7	70.75	206.8	2.8125				19	186			297.1	140.3	49.3	33.9																		16.174			21.973
				77.4			279.1			35.1875	431.812	1401.6		36	137.75	26.2	97.6875				293.9	14.7			458.9	125.2	56.8	50.1																		7.019			13.428
				92			313.4			102.406	66.875	1969.7		90	8.125	81.6	388.719				57.8	10.2			12.8	288.9	107.5	66.2																		12.512			12.817
				230.9			89.9			670.5	215.188	1647.2		82.9	75.875	51.7	53.6875				102.9	68.6			117.1	81.4	202.4	32.3																		5.493			27.161
				119.5			29.2			147.5	30.3125	147.1		180.1	48.5	158.5	71.1875				274.4	71.7			119.9	184.2	15.1	48.5																		12.207			42.114
				11.2			139.8			120.5	699.5	129.6		99.5	98.75	1718.3	526.625				147	142.2			297.8	463.4	99.8	12.9																		14.648			50.354
				11.4			34.3			274.812	998.875	389.4		32.8	22.1875	51.2	67.2812				44.2	332			117	32.5	59.6	13.2																		11.292			17.395
				326			42.7			137		257.2		102.5	125.875	211	0.40625				62.7	240.2			72.6	75.7	21.2	260																		10.071			13.428
				182.6			57.1			192.688		874.6		21.2	100.188	381.2	273.812				113	222.1			85.1	43.5	109.5	24																		32.349			10.681
				70.6			372.3			298.688		993.7		237.9	229.125	174.6	34.5938				244.6	243			66.4	48.3	92	116																		11.597			23.193
				352.7			119			672.5		966.4		127.2	311.625	211.1	205.094				247.1	285.4			313.2	47	218.9	43.6																		34.485			11.597
				776.2			97			217.812				33.9	66.1875	126.4	377.594				60.5	276.3			418	161.6	30.3	28.7																		7.019			12.512
				231.6			132.9			117.688				187.5	53.875	290.2	47.2188				98.8	24.4			38.5	139.4	75.9	27.5																		14.343			14.954
				378.2			39.7			50.4062				140.6	28	315.8	28.7812				98.3	265.6			349.7	57.1	69.9	47.1																		18.005			14.648
				516.6			135.1			248.406				96.3	59.1875	28.2	169.406				172.7	77.3			345.2	131.3	84.5	49.7																		13.733			35.095
				390.2			48.2			752				60.4	45.125	280.4	65.5938				12.3	133.2			183.5	42.3	181.6	21																		10.681			11.292
				419.9			251			218.594				59.4	195.5	487.6	55.9062				229.5	466.9			205.4	360.4	46.5	40.8																		8.24			29.602
				39.4			1082.3			170.094				69.5	235.188	441.9	171.5				140.5	43.6			318.9	49.1	446.4	126.4																		6.104			14.648
				440.7			237.6			347				147.5	160.938	116.1	59.8125				85.2	357.7			60.3	23.1	44.4	203.4																		32.349			14.343
				165.2			162.6			705.5				47.8	86.1875	193.8	210.594				51.1	324.8			125.2	96.8	88.1	41.1																		18.616			10.986
				600.5			187.9			163.125				173.3	349	402	41.0938				118.8	397.9			39.4	222.7	100.1	388.5																		7.629			31.738
				141.6			148.5			34.5938				147.7	178.5	644	146.5				88.8	155.8			406.4	516.1	51.6	26.2																		30.212			29.602
				80.9			283.3			819.906				55.8	247.188	37.8	462.5				427.2	40.3			312.6	68.7	11.6	256.6																		18.311			21.057
				176.9			404.1			697.688				123.3	58.125	38.7	53.9062				52.7	111.4			102.1	231	255.9	76.4																		24.109			12.207
				468.2			272.1			802.312				35.2	52.25	123.7	140.406				30.4	129.6			38.8	30.2	141.7	163.9																		6.714			21.362
				591.4			153.7			38.875				102.5	15.5	243.9	94.875				0.7	124.9			126.7	169.1	109.8	119.4																		8.545			37.231
				30.3			206			263.406				18	16.8125	242.3	714.719				56.3	2.7			679.5	166.8	58.2	10.3																		6.714			23.804
				73.7			48.4			465.812				66.6	76.625	552.4	106.688				649.6	103.3			481.4	95.8	25.4	64.4																		31.738			25.94
				261.5			85.4			182.781				53.1	292.812	320.9	178.312				91.2	13.2			98.5	188.6	108.3	106.5																		35.706			11.292
				171.1			410.5			283				47.3	477.688	213	1.1875				186	90.8			97.2	45.8	61.4	21.3																		25.635			20.142
				331			323.5			662.5				66.5	482.812	234.2	38.5				133.1	376.6			310.3	20.1	136.4	15.1																		16.479			24.719
				373.8			80.5			51.4062				39.1	185.562	178	258.5				171	23			11.4	56.1	97.1	38.7																		30.823			19.836
				49.8			99.9			328.094				49.3	306.125	81.3	164.094				149	71.1			360	42.4	102.3	75.3																		27.771			23.499
				158.4			11.4			93.8125				76.8	448.188	176.7	124.812				20.7	329.2			463.8	70.8	42	66.6																		22.888			14.648
				54.4			239.9			47.6875				243	96.625	65.7	266.094				63.9	144.9			39.4	46.8	24.8	15.6																		8.85			14.038
				17.9			398.6			0.40625				32	173.188	242.9	807				168.7	120.9			170.2	306.9	131.7	33.2																		15.564			12.207
				263.8			122.1			98.8125				56	166.812	209.9	70.4062				420.3	60.2			28.4	130.4	214.1	46.4																		16.174			12.512
				160.1			12.8			290.688				203.7	24.1875	1331.8	70.6875				194.8	179.6			259.8	114.9	86.2	53.4																		13.123			27.161
				103.7			158.7			628.812				50.6	20.5	26.5	67.7188				193.5	420.9			0	56.9	22	25.8																		11.292			33.569
				536.3			338.3			108.594				92.3	336.812	188.5	69				126.2	282.4			134.2	53.5	16.4	18.6																		5.798			11.597
				58.8			87.9			0.59375				211.2	239.25	97.9	1147.78				193.6	122.5			67	80.9	21.8	25.4																		17.7			12.207
				348.6			208.9			86				16.1	422.938	369	126.812				73.8	96.1			356.6	272.7	108.5	77.2																		9.766			28.992
				147.4			13.7			0.40625				171.2	20.5625	1027	53.9062				14.7	25.8			77.9	139.7	48.9	92.6																		28.687			15.564
				165			18.1			2202.41				80.7	52.75	264.8	690				363.3	91.1			188.2	27	71.1	20.9																		25.33			31.128
				14.3			35.6			54.5				174.8	61.875	135.3	171.281				591.5	41.5			697.8	196.2	391.6	93.8																		21.057			12.512
				148.2			118.5			1616.91				204.2	66.625	49.4	132.406				62.1	280.5			73.4	29.4	73.8	27.5																		8.24			16.785
				71.9			524.4			43.6875				26.2	30.375	455.2	220.812				291	93.4			468.1	88.1	41.2	54.1																		35.706			13.428
				127.6			18.4			32.6875				133.7	225.625	45.1	170				20.2	259.2			61.9	110.4	69	110.6																		21.057			14.038
				307.5			244.5			215.812				44.3	257.75	195.6	357.594				22.1	122			537	175	147.3	28.9																		12.817			14.038
				266.9			240.2			473				118	155.938	211.2	127.906				193.8	46.5			40.7	142.8	166.6	37.6																		13.733			14.648
				109.8			609.9			90.6875				74.8	65.6875	362.4	121.594				170.8	113.2			76.1	223.4	78	93.8																		5.798			11.902
				189.5			98.5			322.812				79.7	281.375	64	238.188				236.6	104			64.6	94.8	31.6	182.2																		7.629			25.024
				1031.5			110.4			122.312				244	76.625	66.9	485.219				218.3	63.7			108.9	206	278.8	264.8																		23.804			30.518
				57.9			96.5			400.188				69.8	41.8125	167.2	114.5				125.7	565.3			189	295.9	124.1	43.4																		9.155			20.142
				148			28.8			212.406				150.6	40.3125	400.3	207.188				126.7	249.5			219.8	177.5	55	10																		23.499			22.583
				248.4			382.1			725.781				22.2	193.062	117.5	160.219				134.9	160.3			66.3	386.2	18.5	165																		26.855			10.681
				166.5			208.9			291.125				36.1	39.4375	46.3	358.5				234.9	210.8			76.9	251.9	18.7	125.3																		42.725			19.836
				185.2			251.9			14.0938				32	83.1875	16.3	194.375				268	312			11.3	257.6	18.8	258.4																		30.212			22.278
				57.4			195.3			37.5				164.1	211.875	42.9	280.406				25.4	1080.2			132.2	30.8	104.4	42.1																		10.681			14.343
				1010			50.2			500.188				331.8	147.188	22.3	178.219				71.5	14.8			388.4	107	11.3	23.8																		6.104			10.681
				75.7			876.8			240.594				235.5	738	114.3	129.094				290.3	34.6			98.7	45.8	171	24.3																		32.043			18.005
				0.5			106.3			831.406				26.5	283	722.5	259.5				170.8	18.5			75.8	40.7	126.3	121.6																		32.959			34.485
				115			168.4			404.094				91.7	55.9375	44.1	162.188				29.8	128.8			26.1	128.3	192.8	13.5																		24.719			23.193
				241.8			446.1			369.719				250.4	4.5625	273	71.9062				483.9	492.3			147.8	104.1	101.9	89.6																		17.7			13.733
				176.3			62.1			884.688				117.7	19.8125	334.9	230.188				118.3	175.3			557.3	760.7	72.6	57.8																		22.583			15.869
				113			45.4			131				40.3	42.8125	186	43.7188				92.2	774.9			188.8	185.1	114.9	105.2																		14.954			35.095
				180.8			68.6			584.906				115.4	29.8125	338.7	0.28125				133.9	354.9			549	49.4	264.5	104.7																		35.095			12.817
				52.5			261			111.906				242.1	243	93.4	0.71875				300.6	18.5			71.8	45.8	26.7	107.5																		14.954			15.869
				53.1			185.8			142.594				101.2	983.562	43.4	307.406				50.1	297.4			35.5	68.5	82.9	30.3																		21.973			14.954
				499.7			39.7			243.094				22.5	212.938	106	94.2812				306	200.4			488.1	64	129.9	7																		7.935			16.479
				64.3			43.1			470.812				188.1	180.688	208	93.0938				66.9	1114.4			148.1	275.9	38.6	65.2																		14.954			16.785
				321.6			19.6			326.781				301.3	70.3125	40.5	145.219				60.6	446.9			129.7	139	205.8	10.8																		12.512			27.466
				271.2			70.9			328.219				51.7	301.688	85.7	0.40625				15.4	254.3			23.5	36.2	94.9	23.9																		8.545			16.479
				16.5			33.7			677.906				204.6	96.3125	520.4	195.188				30.4	64			85.7	160.1	168.1	16.2																		21.973			18.005
				181.3			79.3			369.375				231.3	70.8125	92.9	35.875				38.3	517.2			173.5	304.7	288.9	68.4																		9.766			11.902
				21.2			30.2			102.719				781.9	261.875	180.9	95.5				467.1	243.6			75.7	81.8	161	110.7																		9.46			11.597
				713.7			123			142.688				537.7	220.375	607.3	239.75				281.4	115.4			40.4	190.6	91.5	67.7																		25.635			19.531
				162.9			34.1			195.5				212.7	38.4375	112.5	21.6875				582.5	205.7			21.2	62.5	215.7	78.1																		13.733			12.817
				274.9			59.5			562.812				91.3	68.5625	176.6	901.5				94.8	325.2			128.2	261.1	61.4	177.7																		16.785			12.817
				37			26.4			69.5938				52.8	105.75	114.5	441.062				59.5	75.6			236.6	428.3	151.5	127.2																		12.512			14.648
				388.7			169.8			423.688				62.7	600.75	123.2	173.438				43.2	154.7			388.5	168.2	76.2	75.4																		7.629			28.076
				228.6			82.2			94.625				18.1	110	527.5	229.5				365	248.5			161.8	657.7	25.5	37.2																		13.123			15.564
				324.2			270.4			263.688				237.6	149.312	130.8	86.3125				18	379.8			317.7	338.7	44.2	83.9																		6.409			15.564
				141.4			324.5			185.094				121.2	323.125	130.1	372.062				94.3	96.4			104.3	237.8	124.6	109.6																		32.654			12.817
				44			45.3			430.812				87.7	109.688	98.8	25.125				13	347.8			136.2	288.7	127.6	223.3																		6.409			11.597
				307.1			365.9			105				324.9	324.312	343.3	167.812				169.3	221.6			17.9	387.5	182.5	88.9																		32.654			24.414
				785.4			151.8			163				23.1	356.688	1387.2	60.375				502	80.8			232.1	196.6	147.1	85.2																		25.635			11.292
				147.7			170.4			36.9062				53.8	83.5	778.6	166.812				159.5	259.4			274.6	34.5	106.2	146.5																		26.245			13.428
				67.5			89.1			154				52.4	42.8125	97.6	158.812				248.7	97.6			347	92.8	12.6	96.1																		5.798			10.986
				60.3			31.6			1041.28				49.8	23.875	188.3	92.5625				215.2	173			244.8	280.5	307.9	19																		8.545			11.902
				1284.9			2.4			224				298.8	168.5	418.1	211.438				133.7	224.5			92.3	108.2	29.5	36.8																		10.376			25.33
				593.6			51.4			155.812				21.1	116	12.7	238.688				19	136.2			181	469.3	111.4	134.2																		28.381			35.4
				91.4			252.2			150.594				68.3	501.625	321.8	43.8125				94.4	59.4			783.6	107.8	76.8	40.4																		16.785			12.817
				121.4			45.9			61.4062				200.1	271.5	179.9	14.5625				79.3	136.2			39.2	36.1	24.5	50.9																		6.409			11.292
				201.9			78.7			143				44.5	224.875	180.5	150				122.6	195.2			483.4	269.7	72.4	184.7																		21.973			28.381
				19			33.6			173				76	361.188	50.2	167.688				43.9	122.7			923.1	42.5	47.2	214.4																		28.381			14.648
				223.7			474.5			358				27	22.625	786.9	121.75				299.3	413.9			819	31.1	32	14																		7.019			15.564
				11.8			154.3			111.594				15.4	71.375	97.4	428.75				148.9	79.9			44.6	580.8	64.1	134																		7.935			13.123
				152.7			137			59.8125				71.1	67.25	299.6	159.812				10.9	336.4			469.2	339.3	191.2	105.8																		14.648			10.986
				243.3			160.4			69.0938				43.5	470.5	9.6	73				50.3	115.8			206.6	163.2	221.2	113.3																		20.142			11.597
				376.7			7.9			116.094				315	330.875	120.5	34.625				21.3	253.4			462.8	57.2	39.2	104.3																		22.583			12.207
				216.1			58.6			171.5				407.3	596	717.8	111				312.4	257			22.6	163.6	231	106.3																		26.855			21.362
				211			229			632.406				43.8	164.688	229.1	463.875				477.1	391.8			275.9	561.8	369.1	87																		7.324			16.174
				293.8			659.7			179.406				58.5	112.812	760.5	662.688				378.1	37.3			124.5	524.1	112.1	43.1																		17.7			14.343
				46.7			118.4			233.375				58	362.625	141.9	96.4375				388.8	52.9			235.8	124.1	310.4	9																		7.324			25.94
				18.1			62.5			103.219				397.9	22.6875	161.3	988.688				142.2	34.3			423.9	51.9	52.4	33.7																		15.869			11.597
				244.5			5.6			68.7812				660.7	168	335.2	316.625				364.6	259.4			793.5	429	112.4	146																		8.24			17.395
				27.3			397			411.625				17.9	91.375	152.6	389.25				504.4	382.5			59	428.5	14.2	26.3																		24.719			47.607
				299.3			94.4			193				114.8	537.5	387	288.25				64.3	214.1			324.4	125.2	52	100.2																		9.46			17.7
				52.4			109.5			773				276.3	164.375	37.4	194.875				209.8	477.5			392.8	168.4	251.5	30.8																		33.569			18.616
				226.6			230			334.375				225	136.75	204.2	211.812				325.9	50.5			91.5	205.6	89.7	79.6																		9.46			21.973
				270.8			266.1			230.625				181.1	35.25	172.7	58.375				110.1	37.1			426	101.3	22.7	57.9																		5.493			11.597
				46.2			195.7			228.094				9.4	95.5	231.9	108.5				87	20.7			388.3	178.3	38.3	48.3																		21.973			10.986
				47.7			320.6			334.094				389.6	282.625	157.4	68.8125				208.4	85.9			21.3	76.1	123.4	121.1																		7.324			10.681
				561.6			58.1			626.688				120.5	16	142.4	528.625				30.3	39.4			55.8	75	29.2	66.4																		7.019			14.648
				524.9			414.1			17				32.2	146.375	331	342.562				177.6	490.8			127.2	392.7	83.1	43.5																		10.986			15.564
				16.3			15.2			239.719				391	17.4375	258.9	162.938				392.3	60.4			187.9	27.6	94.6	15.9																		28.076			43.03
				470.5			72.9			81.1875				261.3	75.8125	681.8	49.5625				127.1	908.5			148.6	249.3	67.5	21.7																		12.207			27.466
				287.9			75			180.406				623.9	327.25	166.9	125.312				188.7	33.6			98.2	107	138.9	129.9																		28.076			39.063
				751.2			94.9			849.688				16.5	273	107.5	217				293	152.4			177.8	288.7	12	11.4																		8.24			11.292
				279.9			125.7			326.625				144.8	76	1058.9	172.625				12	606.7			68	81	40.6	86.8																		20.447			16.785
				161.9			77			43.1875				422.8	224.938	58	76.0625				311.5	308.1			374.2	1088.3	55	9.2																		11.597			20.752
				78.4			223			37.4062				16.8	58.0625	504.1	121.188				97.4	15.9			89.6	114.8	274	17.5																		9.766			30.212
				34			74.9			151.688				89.7	312	293.1	104.438				328.1	450.3			47	155.3	62.5	93.5																		15.869			21.057
				122.3			238.3			521.312				380.2	77.25	132.7	181.5				52.1	245.8			215.7	49.1	107.4	70.6																		29.297			13.123
				449.9			29			286.406				92	128.188	48.8	41.375				359.3	222.8			261.5	690.5	226.1	55.2																		7.629			14.648
				91.6			260.3			307.281				34.6	269.312	1702.3	96.5				190.1	133			253.2	102.3	54.9	25.5																		18.616			17.09
				276.5			302.6			92.8125				216.5	190.25	154.4	35.125				290.9	136.6			187.2	125.7	133.2	56																		6.409			14.648
				490.3			12.9			403.281				269.5	292.438	41.8	483.062				524.5	662.2			305.5	494.1	202.7	77																		31.128			63.782
				910.1			132.7			103				228.6	46.3125	90.8	86.625				51	437.5			275.5	236.1	45.1	67.4																		17.09			13.123
				469.4			128.9			223.312				241.8	564.688	44.6	243.312				305.9	448.3			209	462.9	58.8	113.3																		8.545			12.207
				288.6			115.4			122				37.8	753.812	290.3	454				80.2	21.5			26.8	301.2	52	16.9																		12.817			10.681
				0.6			25.7			500.906				71.7	68.6875	228	161.312				361.9	340.9			69.7	478.5	24.1	87.3																		13.123			44.861
				26.2			59.7			410.5				48.8	11.3125	347.5	130.688				179.7	793.6			631.1	172.2	32.7	13.8																		29.907			11.597
				24.6			171.7			187.188				502.9	146.188	347.3	654.688				331.8	15.3			716.5	23.2	18.1	116.1																		12.512			14.648
				483.9			38.8			411.312				509.9	419.188	62.8	33.375				33.4	337.6			313	476.2	59.7	29.7																		10.071			21.973
				80.7			35.6			0.59375				174	410.5	160.7	116.625				207.6	270.5			215.1	49.1	24.2	33.9																		5.798			15.869
				115.5			69			358.906				46.7	67.875	198.7	311.125				454.1	49.7			43.8	690	31.2	56.2																		5.493			26.245
				195.9			34.6			221.406				131.8	1123.44	305.4	160.25				209.7	54.7			682.7	160.7	82.2	204.7																		22.888			43.03
				67.4			334			115.094				147.4	24.875	34.1	638.5				88.6	95			186.7	21.2	385.8	478.3																		13.123			26.245
				156.3			476.8			340				49.9	77	56.1	90				188.4	328.5			300.9	29.5	45.4	259.5																		9.766			28.076
				267.7			51.4			668.406				414.4	91.3125	166.4	65.9375				314	404.7			115.2	47.9	80.6	50.1																		11.597			10.681
				211.4			31.2			97.6875				37	42.6875	80.1	346.062				56	157.3			304.4	61.8	83.3	41.3																		14.954			15.869
				98.8			365.2			230.594				414.7	338.5	17.4	186.5				374.2	136.8			65.1	129.9	21.8	46.7																		20.752			39.673
				81.6			282.3			78.0938				23.7	171.812	52	307.5				180.2	112.5			107	209.1	32.7	24.5																		17.395			12.207
				81.1			154.7			580.5				116.4	26.3125	66.8	58.75				15.6	521.2			169.4	209.4	96.9	1.3																		18.616			13.733
				222.8			59.9			150.812				116.7	410.875	115.6	323.188				68.2	486.3			247.6	196.1	92	224.8																		17.395			10.681
				23.5			275.3			146.812				530.4	78.9375	78.4	49				162.4	501.7			73.1	58.7	131.9	98.9																		13.428			14.038
				589.2			137.1			172.094				317.7	26.25	131.5	226.5				98.7	301.5			53	185	141.7	64.3																		18.616			16.174
				110.1			145.7			148.406				292.9	33	454.5	69.8125				60.7	128.1			42.7	91.2	42.8	10.2																		11.292			21.667
				13.8			327.7			184.188				50.4	649.625	174.1	54				360	95.4			86.7	85.8	137.2	82.6																		35.095			15.259
				657.5			309.1			66.1875				103.6	700.312	76	480.188				136.3	114.3			85.5	70.1	49.5	159.2																		9.155			44.861
				148.8			514.6			172				755.8	52.1875	108.4	818.688				342.3	263.7			473.7	150.9	36.4	80.5																		16.785			11.292
				101.7			60.1			427.406				271.9	515.812	145.1	257.812				60.9	33.3			69.1	462.7	7.1	16.5																		18.311			15.259
				47.1			163.9			1020.91				107.9	694.312	128.5	324.812				156.8	40.3			136	200	25	34.2																		14.648			25.024
				267			549.5			170.688				178.9	50.0625	72.6	356.25				208.7	289.1			141	172.1	48	18.6																		7.629			31.433
				106.9			232.6							232.3	39.3125	26.7	94.625				140.2	351.6			62	28.3	19.9	66																		15.259			54.016
				180.8			191.4							244	437.625	87.6	200.5				19.9	230.1			91.9	137.5	150	325.3																		28.381			11.292
				92.5			193.6							21.8	266.5	295.5	251				177.2	285.2			19.7	73.4	134.1	81.9																		11.597			21.057
				402.5			150.3							43.1	518.5	222.8	142.875				219.6	113			7.2	121.7	146.5	46.3																		15.564			23.193
				53.3			167.4							559.9	216.062	70	170.75				226.6	102.9			131.3	34.2	37.3	19.5																		6.714			14.648
				45			105.5							30.3	602	71.7	202.25				202.7	113.2			239.9	150.9	39.1	46.1																		26.245			23.193
				298			355.5							128.7	16.125	386.8	75.8125				112.8	564.7			890.4	144.5	112.7	227.3																		15.564			48.218
				72.1			495.9							457.3	237.062	16.1	174.188				287.2	196.2			71.6	0	74	11.8																		12.512			13.733
				102.3			82							36.3	201.938	86.9	209.312				117	1272.6			894.2	172.5	153.9	112.9																		5.493			28.076
				124.8			292.8							267.8	629.812	220.8	384.312				364.2	719.2			112.7	345.4	179	38.6																		9.155			29.297
				242.9			230.7							309.6	320.25	485.6	50.3125				80.1	135.7			233.6	44.7	24.5	25.6																		10.986			26.55
				370.6			106							268.1	53.9375	18.1	50.8125				42.9	413.8			91.9	42.3	68.6	81.1																		15.564			19.226
				590.2			905.8							154.1	155.375	360.5	198.062				535.9	448.1			66.7	117.1	28.7	26.6																		20.752			51.575
				282.9			213.7							89.5	112.438	566.7	358.688				16.4	226.1			889.5	247.1	42	169.3																		14.343			27.161
				105.2			902.3							189.3	155.875	257.5	65.625				27.6	684.7			133.9	146.9	46.1	14																		41.504			20.752
				391.4			16.6							68.4	30.875	245.4	155.625				303.6	7.5			276.4	72.5	44.8	21.7																		9.155			32.043
				145.4			82.7							159.9	40.5	228.1	1005.88				37.9	1030.6			332.3	170.2	134.6	61.7																		12.817			18.005
				40.9			197							212.5	119.438	78.4	245.188				157.3	106.5			117.4	176.4	140.2	28																		21.667			32.959
				221.5			80.4							56.4	448.812	84.3	206.688				121.1	399.4			35.3	37.5	131	7.1																		22.278			28.076
				111.7			389.5							150.6	169.375	702.6	110.25				329.4	201.1			767.8	88.3	15.8	25.9																		16.785			27.161
				140.8			561.7							952.9	162.625	332.1	452.562				99.8	518.6			237.2	193.5	106.8	35																		19.836			20.447
				25.7			14.1							253	323.375	191.9	31.9375				28.6	75.9			268.2	215	49.1	31.9																		32.349			11.597
				202.2			14.6							74.1	31.5	317.6	187.312				162.1	158.7			105.7	168.6	433.5	30.9																		8.545			51.575
				163.9			23.4							155	459.875	390.5	20.3125				255	322.8			181.5	40.7	23.3	56.5																		26.245			35.095
				274.2			330.7							156.2	211.812	401.9	108.75				206.4	36.1			159.9	616	12.5	22.4																		28.992			27.771
				244.1			375.1							19.8	128.188	45.6	321.75				329.4	598.7			531.7	317.9	52.7	312																		11.902			14.954
				512.9			147.2							410.4	85.3125	67.1	155.062				280.7	647.3			217	346.9	136	21.9																		12.817			19.226
				213.4			565.5							105.4	103.438	384.7	116.125				349.1	595.2			537.1	40	45.9	0.6																		24.109			11.597
				116.3			106.5							646.9	592	594.7	55.3125				25.9	225.3			101.3	128.9	208.5	48.9																		11.597			13.428
				170			17.7							614.2	195.75	45.2	212.25				19.5	34.6			388.6	100.4	309.2	77.1																		10.681			15.869
				603.4			312.2							468.4	305.5	287.8	526.25				221.6	498.6			1554.7	515.4	146.3	97																		24.719			15.259
				64.1			137.5							441.2	59.625	24.3	181.688				71.1	83.5			1.3	84.6	48.3	69.5																		5.798			15.869
				578.9			97.9							221.9	457.125	52.2	13.5				33.3	242.7			1.2	458.8	39.5	22.6																		7.629			36.926
				105.3			113.6							135.2	314.875	232	316.562				0.9	52			176.5	68.5	203	32.3																		19.531			12.512
				112			568.3							500.3	444.688	195.1	71.625				301.6	32.1			190.2	601.2	20.4	10																		15.259			16.174
				135.8			89.3							53.7	499.125	434.2	65.5				356.9	253.7			438.6	41.9	16.2	30.9																		13.428			11.292
				141.2			74.6							1508.5	22.375	198.8	65.3125				74.9	169.9			455.3	160.1	20.9	198.5																		28.992			12.817
				50.7			249.7							108.5	471.188	136.4	416.562				680.6	1051.1			412.1	162.4	91.1	206																		17.7			27.466
				189.6			591.6							200.5	407.438	231.4	13.625				196.5	332.9			336.7	69.1	24	0.1																		6.714			19.531
				377.1			163							39.4	242.875	177.4	106.5				125.4	73.3			79.3	323.3	68.5	288.6																		6.409			25.33
				57.7			577.7							317.5	253	34.5	88.625				94.7	52.1			331.1	344.2	54.9	13.6																		8.24			15.869
				475.2			52.3							214.1	104.438	334.7	210.875				427.3	121.8			251.7	49.7	112.2	73.9																		13.123			27.771
				27.8			47.2							480.8	16.75	388.8	835.312				269.5	140.5			281.3	372.1	74.9	11.5																		14.648			61.646
				155.8			167.4							376.8	80.625	245	65.875				122.4	1520.7				48.6	78.2	60																		6.409			17.09
				572.1			48.7							496.3	50.625	81.2	196.938				1039.2	154.1				108.4	401.5	229.6																		10.986			13.733
				151.9			281.5							502.9	342.75	30.4	36.875				58.7	310.2				513.6	74.1	117.2																		13.428			10.681
				317.3			149.7							73.6	876.812	607.9	450.312				81.2	121.4				17.7	37.7	47.8																		15.259			10.681
				325.4			64.7							68.1	345.812	493.9	119.562				568.6	1165				21	270.8	26.2																		20.142			11.597
				75			87.1							498.1	23.875	85.9	117.25				126.7	453.8				190.6	73.1	89.4																		21.667			21.667
				400.8			30.3							95.8	319.312	662.8	838.688				186.9	28.4				103.4	48.4	200.2																		41.504			29.907
				682.6			164.1							85.9	136.812	74.6	11.6875				351.5	27.2				155.1	39.4	102.5																		6.104			12.512
				44.8			50.1							269.6	371.5	33.2	837.625				194.6	263.2				270	306.2	53.7																		7.019			25.024
				80.6			126.1							27.7	106	172.6	162.875				246.5	127.3				218.9	56.8	11.3																		16.785			16.479
				842.9			41							315	287.312	1678.9	787.188				19.5	11.6				29.6	121.9	33																		12.512			21.362
				50.7			21.3							101.8	237.375	59.6	123.938				154.8	316.1				100.6	47.5	63																		18.005			14.954
				109			225.6							109.5	286.438	534	593.062				704.7	187.6				24.8	116.8	39.2																		8.24			16.785
				523.7			249.2							27.3	116.688	240.3	122				369.8	127.1				1180.2	153.1	86																		19.836			14.343
				282.9			380							11.4	44.1875	49	260.938				57	149.3				305.4	70.2	55.1																		24.109			11.902
				34.8			284.1							141.8	537.875	164.9	778.688				381.6	234.8				15.2	113	61.6																		5.493			23.499
				301.6			221.3							148.4	173	56.2	175.688				259.1	684.1				20.2	155.2	32.3																		28.687			13.428
				267.1			19.8							106.5	283.25	65	166.188				86.8	18.6				157.5	34.6	64.2																		7.324			32.654
				375			501.7							23	221	386.4	1651.19				530.8	100.6				131.1	27	97.2																		31.128			65.308
				270.1			468.6							71.9	178.875	168.6	854.125				68.2	215.5				235.1	52	99.3																		7.019			17.7
				75.2			281.4							267.3	148.312	98.3	588.312				207.5	225.4				29	13	276																		6.409			36.926
				171.1			93.2							70.3	507	1354.9	61.6875				23.8	67				154.5	21.6	50.5																		6.104			14.954
				239.4			619.4							47.6	66.3125	26	16.875				42.1	91.3				45.6	31.7	7.6																		13.733			13.123
				247			296.7							0.4	22.75	224.2	100.938				107.1	266.9				644.7	38.9	61																		6.104			11.597
				291			97.4							292.6	130.938	232.3	217.312				281.3	361.4				91.8	208.3	97.1																		13.428			16.174
				197.4			43.9							420.1	452.875	602.6	62.25				52	404.6				228.9	84.7	77.2																		18.005			18.005
				89.6			498.1							138.5	56	268.1	367.125				163.5	270.5				75.7	17.7	23.5																		37.537			40.894
				408.6			126.6							71.7	305.188	114.7	192.375				56.7	21.4				328.8	144.2	19.9																		25.33			12.512
				80.2			261.5							108.3	24.125	72.7	108.25				84	32.3				380.1	68	37.4																		6.714			19.226
				53.1			539.9							15.5	998.5	179.9	142.562				405.5	116.8				129.3	36.6	112.1																		15.869			14.343
				380.7			71							40.6	178	372.2	258.688				377.2	126.6				163.2	440.1	102.3																		9.155			46.997
				47.6			21.4							40.8	149.688	13.6	483.75				35.1	47.1				120.7	283.7	14.6																		17.7			38.452
				65.1			221							143.1	39.1875	263	366.062				38.2	350.6				319.4	60.9	97.6																		6.104			28.992
				335.4			323.9							165.1	514.75	106.3	63.3125				127.6	133.7				66.5	39.1	157.4																		17.7			19.531
				180.7			189.9							316.5	117.062	293	75.375				323.9	19				56.7	20.8	86.1																		13.123			17.7
				590.7			106.8							21.9	367.125	191.7	844.5				305	566.1				142.8	70.6	232.9																		13.428			18.311
				152.7			183.9							274.7	873.188	68.8	570.5				493	352.2				229.4	79.7	52.2																		12.207			23.499
				190.8			591.6							229.5	111.375	36.5	161				65.1	469				251.5	45.7	15.9																		6.714			15.869
				197.7			195.9							110.6	197.5	683.4	420.25				234	107.7				33.1	484.3	21.8																		10.986			16.479
				10.8			455.9							406.5	64.625	832.1	672.25				141.8	43				193.2	13.2	51.2																		28.076			16.785
				181.9			125.8							135.9	116.125	977.1	541.125				157.7	101.7				994.3	26.6	49.1																		12.817			15.564
				656.8			529.4							126.8	15.5	181.4	106				393.2	27.6				171.4	92.5	19.7																		21.362			11.292
				245.9			74.8							369.5	56.1875	28.3	173.125				276.6	272.8				672.1	118.1	162.4																		21.667			16.174
				20			124.4							67.3	214	105.6	92.1875				164.8	135.7				88.8	10.9	120.4																		16.479			12.512
				851.4			99.9							62.1	539.188	1090.5	228.688				736.2	602.7				258.6	63.4	104.3																		7.629			11.292
				78.7			181							173	17.6875	671.3	205.312				224.3	96.2				123	275.9	151.7																		16.785			18.311
				82.9			49.2							261.4	649.312	70.1	272.312				30.8	71.7				121.7	34.3	262.9																		19.531			35.095
				239.3			184.5							56.4	178.5	105.2	342				43.1	32.5				238.1	49.6	52.8																		12.817			34.18
				173.1			696.9							220.1	59.125	50.6	229.062				301.8	504.6				2	159.3	59.9																		30.823			17.7
				284			255.9							259.6	616.062	596.4	283.938				243.1	329.4				296.8	7.2	26.4																		19.226			27.466
				183.9			373.2							646	246.438	140.2	193.688				167	566.5				378.3	90.6	14.2																		37.537			17.7
				98.3			144.3							330.4	133.062	660.1	206.062				309.4	211.5				7.1	242.9	10.4																		30.518			24.719
				43.1			71.7							181.9	395.188	194.8	29.625				39.7	173.2				75.1	81.7	75.6																		7.019			22.278
				449.9			183							436	24.9375	98.9	122.312				170.9	277.7				237.3	89.8	57.9																		29.602			14.648
				16.3			205.2							177	590.312	376.9	227.812				459.7	236.7				257.5	79	108																		6.714			28.076
				59.7			190.8							54	60.5	6.4	132.188				86.9	39.5				209.3	216.5	90.2																		13.428			45.776
				159.4			132.1							117.5	373.25	108.5	74				218.7	13.4				70.8	85.8	7.3																		10.071			11.597
				168.3			147.8							202.6	805.75	103	114.188				52.6	549				35.8	88.6	74.8																		32.959			15.259
				143.5			238.3							30	114.875	24.9	751.375				245.6	844.5				764.9	64.7	27.9																		9.46			17.395
				249.1			313.8							137.7	73.625	177	274.625				380.5	535.8				153.9	71.5	77.7																		27.771			28.687
				31.4			202.7							134.9	31.75	416.4	83.5				196	910.6				139.3	87.4	53.3																		14.648			15.869
				525.3			93.8							580.8	269.125	379.7	133.625				135.7	210.7				523.4	12	38.8																		7.629			23.804
				152.9			35.3							621.5	221.312	258.7	306.062				92.7	128.9				617.2	20.9	8.3																		14.648			17.395
				119			26.4							377.6	274.875	34.3	109				312.5	64				383.2	16.6	34.4																		8.545			10.681
				351.3			421.7							39.5	87.9375	459.9	358				225.7	105				174.8	23.3	51.1																		35.095			43.64
				889.1			47.3							208.9	55.1875	52.7	320.938				91.4	97.2				733.7	31.5	181.3																		10.986			53.711
				69.2			0.6							226.2	27	55.5	131.188				329.9	327.6				28.4	57	207.9																		11.292			54.932
				106.3			288.7							41	166.812	16.2	156				130.2	120.7				55.9	25.3	13.8																		24.109			10.986
				60.6			94.9							158.5	202.062	328.9	439.312				768.2	651.3				207.9	74.8	51.1																		18.005			26.245
				320.8			124.9							221.8	94.125	405.9	293.562				24.2	11.4				444.1	20.4	104.8																		5.798			13.428
				441.8			6.3							168.9	120.5	27.2	2463.5				45.8	295.3				36.2	125.5	88.2																		10.071			18.005
				387.1			156.9							158.3	101.688	34.5	398.312				166.9	296.5				75	421.7	32.7																		10.071			19.531
				156.5			19.4							369.5	43.8125	910.3	191				196.8	278.4				355	143.5	37.4																		16.174			25.33
				460.6			232							294.1	188.062	106.8	172.375				190.6	273.1				311.5	116.3	36																		11.902			68.665
				157.1			321.7							26.7	5.9375	825.9	22.5				22.3	461.8				146.4	139.1	308.8																		7.019			13.428
				89.9			61.1							28	104.062	123.5	309.25				149.7	306				63.6	62.5	58.4																		16.174			15.869
				534.5			134.8							177.3	540.312	360.8	177				116.6	614.5				50.5	62.5	248.3																		37.842			14.954
				26.3			153.7							304.9	137	86.8	357.562				412.5	58.4				614.4	133.5	117.8																		20.752			23.804
				180.2			1.7							392.1	267.125	750.5	262				109.2	343.5				594.5	107.1	29.3																		15.259			34.79
				49.8			222.3							18.2	81.8125	208.3	101.125				272	24.3				58.6	26.7	50.3																		37.537			19.531
				631.5			496.9							272.4	291.5	15.3	477.188				750	1105.7				283.9	236	84.4																		10.681			31.128
				85.4			264.9							405.6	135.875	23.8	415.188				86.9	133.3				682.3	66.2	63.4																		5.798			18.616
				36.6			28.9							377.1	545.125	302.7	38.9375				49.6	58				97.7	179.7	161.1																		12.207			17.09
				266.3			49.3							180.2	213.062	19.5	979.062				132.4	263.8				211	7.9	86.7																		21.667			13.733
				497.4			120.7							267.3	186.312	296.8	478				211.3	228				111.5	359	32																		9.766			21.667
				575.4			32							440.7	159	79.3	633.438				208.8	1257.7				138.6	52.7	45.4																		10.681			12.512
				145.2			13.2							153.5	139.312	279.2	750.062				91.7	294.2				201.2	15.8	8.9																		18.005			14.038
				210.9			630.7							149.8	63.5625	635.1	239.812				340.2	300.9				22.8	101.4	120.7																		16.785			15.564
				891.2			38.6							295.3	328.438	664.3	68.8125				719.2	265.9				286.9	264	60.5																		19.836			16.785
				376.2			15.8							166.3	59.3125	332.6	430				548.4	319.2				47.2	82.7	61.5																		6.714			10.986
				663.4			33.7							23.5	135.75	740.6	32.375				119	152.3				147.5	57.8	93.6																		13.123			16.174
				728.1			855.1							19.5	451.438	574.7	97.8125				17.4	272.7				812.2	23.7	63.7																		20.142			20.447
				91.5			308.1							291.6	102.562	141.1	56				30.3	77.7				36.8	69.9	56.9																		6.104			13.428
				261.3			651.9							80	150.312	400.6	390.625				532.3	303.9				88.7	311.9	66.8																		5.798			44.861
				20.6			216.9							58.6	64.6875	66.5	33.1875				99.4	86.8				19.7	242.2	28.2																		35.4			13.428
				213.5			75.9							116.8	600.438	91.2	373.375				63	105.4				633.6	8.5	49.9																		15.869			16.479
				39.8			245.8							121	323.312	512.3	120.812				35.7	181.7				19.1	37.6	28.8																		21.057			15.564
				54.7			30.8							59.4	236.25	30.3	285.5				415.9	109.4				472.8	140.8	30.9																		14.343			21.362
				76.5			156.8							251.7	470	75.7	202.375				363.6	29.3				178.4	87	159.5																		24.719			18.921
				159			1153.6							116.2	3.9375	71.5	408				115.4	39.6				35.8	142.9	41.7																		15.564			14.648
				31.1			400.6							127.2	316.875	119.5	189.25				114	162.7				518.2	166.7	81.1																		14.954			10.986
				52.5			248.2							236.8	318.312	806.5	532.188				778.4	250.1				68.7	324	64																		17.395			14.343
				1191.3			207.9							159.5	122.375	75.3	136.062				448.3	54.9				217.5	75.6	256.9																		6.104			18.921
				230.4			889							114.2	268	54.2	30				148.9	306.4				776.7	188.5	169.9																		12.512			30.212
				249.2			54.8							74.7	595.312	553.3	399				402	395.9				145.6	145.9	133.5																		26.55			10.681
				92			36.3							64.8	322.438	161.2	603.5				56.2	272.6				296.9	84.9	15.5																		21.667			13.123
				72			49.1							24.7	228.375	732.8	455.438				523.3	110.4				580.8	129	90.5																		25.94			19.531
				169			13.2							56.6	103.125	1.2	262.188				557	243.6				89.8	33.3	19.4																		5.493			12.512
				167.8			14							282.5	47.25	89.5	349.5				82.3	104				357.5	111.6	60.7																		9.766			11.902
				155.9			54.4							144.4	267.812	250.8	168.875				1502.2	471.6				430.4	9.9	75.3																		7.019			17.395
				41.1			42.9							133.7	104.625	442.3	79.3125				102.2	136.9				18.6	55.3	1.8																		23.499			14.038
				407.3			298.6							165	160.562	116.7	113.938				341	145.6				70.2	87.8	135.5																		28.381			10.681
				391.5			23.2							159.2	97	12.9	38				213.6	249.7				239.6	45.2	11.7																		8.85			19.226
				196.7			54.5							124.3	119.438	101.2	102.062				907.3	108.5				138.3	43.6	17																		15.564			12.817
				51.9			289.4							363.4	32.6875	75.3	996.125				388.7	89.7				267.6	127.9	127.6																		6.409			16.479
				110.2			299.4							9.3	430.125	11.6	551				94.4	215.1				117.5	106.2	48.4																		15.259			11.292
				261.8			22.3							19.5	643.5	191	154.062				54.3	12.8				249.4	55.5	128.6																		8.545			10.681
				37.6			23.9							37.9	85.75	17.9	301.25				286.3	21.8				165.1	125.8	37.7																		39.673			13.123
				196.4			150.3							159.7	335.25	202.7	402.75				314.9	34.9				289.8	25.4	80.5																		8.85			30.518
				265.6			105.2							192	268.875	110.5	130.125				53.3	172.5				79	86.8	40.1																		6.104			27.161
				132.6			156.8							26.6	345	920.1	283.188				52.2	435				501.4	236.6	13.3																		13.123			34.485
				194.2			283.9							131.6	102.5	159.1	134.938				104.5	84.7				197.1	78.5	26																		10.376			28.992
				112.2			287							72.6	528.188	45.2	627.25				140.4	27.9				47.1	10	83.7																		13.733			11.292
				68.7			117.3							68.2	51.125	44.3	195.125				67.9	493.1				212.9	151.7	68.3																		21.973			26.855
				276.5			692.4							171.9	19.5	132.9	95.1875				24.3	184.1				18.1	262.3	116.8																		8.24			12.512
				355.8			220.9							17.4	31.1875	407.9	526.125				130.1	338.7				49.6	238.4	33.3																		60.425			27.771
				103.5			541.9							101.4	360.688	151.6	108.375				65.9	217.2				77.4	172.1	40.4																		9.155			14.038
				23.1			252.4							126.2	331.188	359.6	74.4375				86.1	459.8				51.4	76.3	97.4																		8.24			20.752
				108.9			676.7							65.6	77	79.2	130.75				366	56				128.4	105.8	51.6																		14.038			17.7
				149.2			152.6							113.4	331.5	184.5	75.75				58	26.1				51	86.5	41.7																		17.395			23.804
				912			137.6							65.9	72.75	143.8	230.062				53.9	362.2				70.7	75	35.4																		6.104			12.207
				1370.2			0.8							189.2	173.062	398.9	1302.5				265.2	189.5				386.8	126.1	5.7																		17.395			11.597
				591.8			127.8							194	15.5	860.2	291.5				22.8	52.1				815.5	114.4	21.1																		14.954			10.681
				154.2			29							139.4	49.9375	933.1	713.125				485.2	161.1				314.8	9.4	121.7																		16.785			13.123
				546.9			940.9							367.1	17.75	11.3	129				331.9	0				53.1	110	23.9																		25.33			26.55
				221.6			160.5							39.8	363.25	75	417.375				41.6	56.9				192.3	61.1	51.6																		21.362			19.836
				359.1			531.2							90.7	89.375	61.8	225.5				202.9	104.7				50.4	93.7	14.6																		13.733			27.161
				25.8			302.6							14.2	179.188	366.7	203				108	561.8				250.6	20.2	78.8																		19.531			10.681
				90.8			833							257.3	55.125	535.9	366.438				54.3	168.1				83.3	100.8	81.6																		15.564			22.583
				73.7			215.8							34.6	170.5	115	79.75				171.3	45.4				24.1	272.6	136.6																		6.714			27.466
				79.8			260.7							91.5	134.562	293.4	287.438				222.5	11.8				357.3	198.4	101.6																		18.005			25.024
				1492.2			335.7							199.5	285.125	181.8	432.562				223.2	226.2				204.8	14	75.4																		6.409			15.564
				290.3			304.2							21.2	123.5	69.4	86.8125				126.9	231.2				97.4	94.4	33.5																		12.817			20.447
				121.4			7.8							101.7	104.688	1183.6	461.438				492.9	189.3				723.2	108.2	101																		7.935			24.719
				27.9			1.7							148.7	119.5	381.5	34.0625				120.2	192				424	55.2	8.1																		9.766			36.011
				133.3			146.2							237.7	311.312	85.6	309.938				67.1	383.8				303.6	73.3	28.3																		29.907			14.038
				113.6			86.5							65	359.125	93.1	130.5				113.6	256				61.2	226.1	49.1																		7.019			42.725
				189.2			259.9							109.9	204.25	411.5	487.5				66.2	106.8				267.1	135.3	37.4																		22.583			41.199
				68.8			61.4							66.1	100.938	816.6	151.375				184.1	48.4				212.7	257.1	68																		29.602			28.381
				325.5			145.1							41.3	120.312	57.9	159				196.3	42.4				42.9	46.2	44.6																		39.368			11.292
				559			402.1							13.6	324.875	356.2	280.812				762.5	37.7				67.9	53.3	16																		13.428			15.259
				513.9			940.9							81	240.5	350.9	177.562				833.3	140				369.7	77	26.3																		14.648			40.894
				34.9			54.1							19.5	226	24.3	104.25				484.1	11.9				1187.8	132.5	50.6																		6.714			12.207
				16.6			245.5							97.3	57	30.7	335.562				1048.8	338.1				167.1	24.6	21.3																		14.038			11.902
				36.1			651.1							184	125.188	315.8	889.938				357.1	317.1				198	356.8	89.2																		11.597			15.869
				386.8			50.7							65.8	283.812	721.1	101.375				530.4	77.2				523.8	48.9	82.1																		16.785			15.564
				181			319.3							68.9	80.6875	166.6	340.5				158.7	140.3				490.6	90.8	59.6																		9.155			20.752
				67.3			63.2							48.3	285.812	539	246.5				202.1	509.2				349.9	60.1	58.5																		7.935			25.635
				522.4			207.8							135.1	119.812	532.5	117.625				280	424.5				22	111.1	68.5																		21.057			11.902
				96.6			86.6							64.3	109.562	212.1	65				179.1	133.1				364.1	39.8	95.9																		16.479			12.817
				126.6			149.8							77.2	262.812	283.3	32.6875				179	50.9				160.7	21.6	13																		26.855			27.161
				53.4			103.1							6.1	18.3125	586.6	88.875				116.1	260.3				135.5	99	33.9																		19.531			20.142
				505.5			630.5							95.7	199.812	217.6	181.5				961.3	50.4				53.7	212.2	176.9																		14.343			42.419
				347.2			110.5							65.4	59.5	358.9	402.625				490.4	29.6				275.7	231.6	63.6																		7.324			30.518
				95.2			63.4							196	64.875	834.7	380.375				106.4	263.2				579.4	44.1	8.7																		17.09			14.038
				157.9			79.3							115	74.25	111.3	390.688				85.1	149.7				143.8	137.1	35.7																		19.836			11.292
				115.5			28.9							30.6	20.875	132.5	349.625				378.5	13				85.9	53.6	45.2																		7.019			37.842
				47.7			134.4							310.6	285	175.6	336.688				72.6	175.7				99.7	167.6	112.9																		8.24			47.607
				385.3			29.5							67	250.25	158.4	40.5				187.5	308				431.9	35.9	67.7																		6.104			42.114
				46.5			163.4							140.9	27	605.1	28.125				32.6	297.2				45.3	41.7	38.6																		6.104			25.635
				47.3			57.3							101	16	155.3	117.688				77	109.9				362.1	67.8	104.3																		15.259			30.212
				820.3			142.6							42.4	86.75	185.8	284.625				498.7	190.6				28.2	206.6	102.6																		15.564			45.166
				77.4			0.6							68.5	29.5	210.3	132.375				17.8	144.1				182.3	15.3	29.2																		41.504			45.166
				319.3			113.5							49.6	158.25	640.3	24.6875				106.2	276.9				123.2	40.6	11.1																		7.629			21.362
				169.2			116.6							29.7	148	1364.2	116				56.7	207				572.6	109.4	132.3																		6.409			31.128
				43.3			80.3							55.6	158	128	302.5				511.5	159.6				299.6	99.5	249.7																		23.193			11.597
				1488.1			24							143.6	168.875	1331	150.812				178.9	63.7				95.5	202.2	34																		5.493			14.038
				176.5			301.7							76	182.375	352.1	286.625				1104.8	527.6				127.8	237.5	44.7																		21.362			21.667
				262.6			324.5							369.1	14.75	1029	411.875				155.7	136.5				59.3	78.1	12																		5.493			43.335
				85.1			252.6							27.8	89.5	45.7	381.625				638.7	467.8				293	28.9	98.3																		7.629			27.161
				367.2			285.9							51.3	94.75	1114.4	411.188				324.9	534.2				543.1	166.6	32.2																		6.104			32.959
				300.3			586.3							196.1	48.5	192.8	52.3125				219.4	73.3				34.4	235.2	166.9																		10.376			11.292
				72.2			421.4							66.4	160.625	112.5	219.562				319.5	162.5				521.2	500.6	73.5																		7.935			15.564
				98.5			252.2							33.5	19.625	1001.6	197.188				205.3	460.7				590.4	221.4	18.9																		7.324			13.428
				86.1			117							85.2	151.625	290.4	281.312				63	1011.5				333.6	47	120.6																		24.719			10.681
				875.7			177.8							24.1	204.875	596.6	39.125				242	49.6				346.6	464.7	75.6																		7.629			36.316
				292.7			226.2							59.5	109	48.9	119.312				464	275.3				51.2	98.9	52.1																		15.869			21.973
				524.3			76.3							157.3	61	16.2	971.188				477.7	111.6				156.4	131.1	28.1																		26.855			11.597
				432.4			129							109	113.5	123.6	40.875				94.3	210.2				305	32.6	58.1																		11.902			23.499
				200.3			425.8							338.3	22.625	303.5	144				232.8	360.2				143.7	145.2	29.4																		14.648			15.869
				10.5			50.1							143.8	149.375	528.6	131.938				37.4	631.9				68.4	26.7	35.3																		23.804			24.719
				326.7			78.8							17.5	70.25	474.1	768.375				161.5	320.1				93.8	19.5	115.3																		7.324			25.33
				147.6			168.2							67.7	39.375	44.4	449				18.6	392.2				27.9	115.3	85.1																		11.902			10.681
				225.4			257.7							34.5	22.875	158.1	45.375				779.6	67.5				1463.9	253.4	117.7																		17.395			15.869
				393.4			46.1							217.4	77.25	758.6	108				344	13.1				85.4	62.9	30.3																		7.935			13.733
				34.3			781.1							23.6	127.875	1461.2	47.3125				319.5	1061.3				515.8	50.8	92.4																		15.869			30.212
				390.9			384.2							86.4	45.5	202.3	125.688				134.1	346.2				213.8	273.1	275																		17.09			38.147
				529			25.4							86.4	106.375	327.3	530.312				212.9	106.4				12.8	47.7	31.2																		14.648			13.733
				57.2			25							154.9	121	89.1	200.938				687.7	508				94.1	250.3	34.9																		6.104			31.738
				50.3			37.7							87.1	53.625	224.2	9				41	226				261	38.8	133.5																		7.629			15.259
				41.2			133							67	13.375	351.9	355.5				213.9	179.1				252.4	117.2	90.6																		14.954			37.231
				78.6			392							121.9	125.25	654.7	332.188				241.2	677				606.7	47	115.3																		8.85			16.174
				45.5			39.3							76.5	216.625	230.1	60.5				87.3	408.1				345.8	62.7	86.5																		27.771			21.362
				65.8			117.5							371.7	420.625	392.9	1004.88				319.4	367.6				97.3	206.4	47.6																		7.629			33.264
				403			163.6							47.8	50.5	122.2	702.812				29.2	24.7				43.2	32.9	61.1																		20.142			21.057
				170.5			265.3							102.4	182.375	811.4	77				52.7	69				48.8	180.1	7.5																		7.629			14.954
				256.8			241.9							170.3	87.625	126.7	54.3125				61.6	384				261.3	112.3	14.3																		7.935			32.654
				31.4			36.4							175	14	1529.7	237.188				43.5	222.7				155.2	40	15.3																		7.019			25.94
				456.4			299.5							29.1	46.5	131.1	66.875				420	257.3				80.4	82.3	35.1																		27.161			32.043
				843.4			50.6							132.9	82	63.6	36.125				61.1	799.6				136.9	400.7	127.9																		19.836			15.259
				178.8			114.5							319.9	104.625	135.1	449.688				33.9	514.6				49.4	138.8	49																		25.94			16.479
				822			87.7							69.1	66.875	112.3	1402.12				405.8	154.4				49.7	84.5	49.8																		5.493			14.343
				147.3			465.1							10.3	202.25	10.8	123.188				476.1	109				75.4	215.1	2.2																		7.935			24.414
				262.7			109.5							161.3	296.25	92.4	872.125				117.8	835.7				59	56.5	76.3																		12.512			29.907
				277.2			1790.8							181.4	138	471.3	95				81.6	566.3				1499.7	128.1	192.3																		39.063			14.954
				26.8			462.4							41.5	40.5	155.4	199				426.5	44.7				831.8	19.2	38																		19.226			25.94
				271.2			184.9							203.8	19.875	230	38.6875				124.3	62				15.5	130.5	186.9																		14.038			11.292
				467			519.9							96.5	78.625	189.4	411.062				19.7	37.6				47.9	21	203.7																		6.714			17.7
				209.2			48.6							241.5	242	169.7	187				352.5	33.3				37.1	40.3	33.1																		13.733			14.343
				59.1			603.7							78.9	135.5	179.5	373.438				175.6	142.2				60.9	38	137																		16.785			39.978
				25.5			104.6							172.4	153	406.3	577.312				277.4	39.1				417.4	32.6	22.9																		14.954			11.597
				48.5			603							37.4	34.5	1185.8	136.688				310.1	167.2				37.1	35.7	9																		10.376			11.597
				158.2			59							399.4	33.125	186.8	414.375				339.7	196.8				207.9	43.5	115.6																		25.94			11.902
				937.3			190.8							66.4	138.875	651.7	143.125				56.1	131.9				57.8	85.3	94.6																		12.512			18.311
				22.5			214.2							158.3	339.125	342	91.5				38.1	283.4				172.4	33.7	157																		15.564			24.109
				164.2			25.3							144.5	233.25	117	207.312				301	57.6				337	61.7	29.7																		11.292			18.616
				2232.2			663.8							79.4	30	983.9	321.562				319	404.9				90	25.8	2.4																		13.428			25.635
				292.9			63							177.7	44.625	412.5	636.5				80.2	60				498.8	621.9	24.1																		10.986			11.292
				116.8			233.9							52.6	31.625	218.4	185.438				198.5	665.2				85.2	103.3	67.3																		116.577			14.038
				223.1			945							201.3	229.5	152.7	178				195.4	456.5				760.2	49	80.4																		28.076			29.602
				147.3			40.1							234.4	33.375		412.75				453.6	1583.8				56.8	115	154.9																		5.798			49.438
				65.6			694.7							173.3	104.625		285				270.2	36				971.6	76.4	34.5																		16.785			28.687
				215.7			125.9							72.7	30.25		37.5				532.9	56.2				42.7	96.2	69.7																		17.09			28.076
				619.7			80.5							10.7	110.625		84.75				40.3	134.4				344.6	166.1	37.8																		27.466			25.635
				380			219.7							37.5	174.375		167.375				410.7					369.9	53.2	31.4																		19.836			45.471
				340.2			515.5							230.3	317.625		347.188				129.5					53.9	93.6	23.9																		11.292			14.648
				45.2			120.4							229.1	117.75		364.812				232.2					425.2	114	29.5																		36.621			18.311
				137.3			40.7							52.1	165.25		33.625				274.6					218	210.3	173.7																		14.954			21.057
				56.7			44.5							146.2	52.875		1010.56				54.1					17	174.5	56.8																		52.49			17.395
				86.4			57.2							176.8	139.625		1165.44				54.6					208.1	153.9	100.9																		16.479			10.681
				296.9			148.1							34.8	98.5		38.875				72.6					41.6	27.4	16.8																		40.894			20.447
				340.2			287.5							128.4	183.5		167.375				189.4					20.3	271	36.6																		7.019			18.005
				515.2			68.6							302	33.5		543.5				27.9					396.3	97.6	63.1																		15.564			17.395
				105			341							34.7	69		57.9375				195.9					39.5	251.4	45.3																		28.381			42.114
				453.5			272							92.4	35.75		50.875				172.7					18.7	18.8	49.7																		17.09			10.681
				131.3			242.7							80.5	30.5		331.312				195.1					934	145.2	264																		17.7			23.499
				369.6			109.3							74.3	117.75		169.5				292.3					262.8	217	104.5																		7.324			19.531
				78.1			20.3							193.5	88.25		300				263					415.7	47.7	57.3																		18.311			11.597
				255.6			429.6							21.3	104.25		229.312				36.5					311.8	111.1	98.7																		19.226			14.954
				213.5			426.9							98.9	178.5		419.875				83.4					1062.1	110.8	17.5																		9.155			23.193
				913.7			119.6							142.3	34.75		620.688				171.4					29.7	120.1	12.8																		21.973			26.855
				149.8			410.9							96.1	30.625		880.812				178.6					105.1	337.5	76.7																		7.019			17.395
				434.2			666.3							99.8	141.375		874.312				53					273.9	365.8	80.6																		7.935			22.583
				15			2.4							49	152.75		69.875				374.3					140	76	97.1																		11.597			52.49
				95.6			119							193.4	21		218.438				380.9					358	249.4	123.7																		6.104			13.733
				275.4			53.1							89.4	36.5		364.188				124.6					519.3	197.4	122.3																		25.33			22.278
				180.2			243							55.9	96.125		99.5				21.1					43.2	136.3	84.1																		7.629			13.428
				30			268.6							75.9	44		390				42.1					315.7	203.2	22.7																		8.85			10.986
				320			34.3							138.3	106		531.375				274.8					164.6	35.3	37.1																		5.493			13.428
				121.3			287.2							132.9	85.125		75.125				29.3					93.7	39.6	81.9																		7.324			10.986
				44.9			416.7							43.7	136.75		415.188				11.1					79.2	167.5	29.8																		13.733			20.447
				943.9			69.1							41.6	103.375		108.938				207.7					194	77.8	28.5																		32.654			23.193
				486.1			72.2							253	30.25		89.5				154.1					176.9	70.5	70.8																		7.629			13.123
				239.1			59.8							26.3	55.25		286.688				380.2					62.7	108.7	42.7																		24.414			36.926
				367.4			420.9							148	15.125		357.875				295.4					807.2	301.4	20.6																		5.493			28.381
				77.1			31							28.7	98.625		234.188				60.1					127.1	185.5	23.5																		17.7			18.311
				142.8			156.8							43.4	23.25		34.5				165.5					60.8	67.7	0.4																		18.921			13.733
				63.8			203.4							38.6	119.625		677.75				113.5					175.2	98.5	19.1																		10.071			10.681
				213.4			0.9							306.4	134.125		401				208.7					336.7	163.4	84.7																		27.466			15.564
				391.5			219.4							97.5	20.625		379.25				271.3					520.4	260.7	16.5																		26.855			22.278
				51.1			12.4							35.6	25.625		96.75				200.8					298.5	27.3	171.7																		18.005			14.038
				47.9			226.9							111.5	150.625		584.25				423.1					103.6	115.6	77.8																		36.316			20.142
				31.5			444.2							63.3	167.375		1703.81				302.3					38.4	235.8	15.1																		14.038			12.817
				116.7			255.1							147.5	124.125		181.688				101.4					118.3	88.4	120.2																		48.218			20.142
				29.6			327.7							88.5	287.25		218				27.7					213.3	128	8.4																		18.005			12.512
				113.4			176							128.2	58.25		464.812				27.2					27.3	17.1	51.3																		6.409			22.278
				57.1			64.9							94.2	99.875		32.625				24.6					128.9	10.6	44.2																		16.479			10.681
							37.1							105.6	206.125		84.3125				155					210.3	137	24.4																					14.954
							51.6							22.7	15.875		204.5				95.9					448.9	63.8	37.6																					16.174
							552.4							117.9	201.125		295.75				12					351.8	112.4	67.8																					35.095
							115.9							60.5	26.125		354.125				80.8					208.8	39.8	127.4																					19.226
							478.6							126.2	338.875		981.375				65.1					403.6	12.8	60.7																					34.485
							252.4							39.3	187.25		326.312				39.4					446	47.9	17.6																					18.616
							120.4							136.3	83.375		319.125				76.9					231.3	313.2	38.9																					22.278
							448.3							69.2	21		75.6875				51.7					334.4	108.3	87																					11.292
							65.5							201.8	40.625		50.5				106.2					78.8	234.6	29.1																					11.597
							22.6							21.7	131.25		379.375				896.8					144	49.7	174.8																					13.123
							347.3							38.3	349.25		82.625				223.1					113.1	122.2	69																					11.292
							39							137	68.875		196.5				45.6					292.2	228.6	53.1																					31.738
							109.9							83.6	195.875		150.688				42.2					170.9	262.1	28.3																					21.057
							246							67.4	85		119.438				226.3					463.9	75.9	71.3																					35.095
							690.1							15.4	176.5		94.75				98.7					443.3	45	251.9																					37.537
							135.6							78	72.5		173.5				357.3					2.7	146.8	34.6																					12.207
							251.2							431.1	127.625		246				127.6					352.9	148.9	18.3																					12.512
							48.7							66.1	193.125		135.812				141.1					162.1	8.8	19.2																					13.428
							17.6							98.5	26		185.688				28.4					138.9	173.5	96.7																					17.395
							566.4							41.1	87.625		495.5				90.4					426.2	166	32.4																					28.076
							178.1							250.5	72.125		366.625				288.5					489.8	94.6	8.7																					20.447
							135.1							53.1	338		477.375				118.9					40.7	100.5	63.1																					22.278
							276.6							468.7	62.375		72.4375				344					83.8	38.6	96.7																					15.259
							57.4							121.5	118.625		173.688				35.4					226.1	107.4	59.1																					11.292
							94.2							531.9	101.625		54.375				36.1					318.6	105.8	1.2																					24.414
							715.7							76	61.75		683.812				17					31.6	146.2	60.7																					14.038
							273.6							16	127.75		314.812				195.4					90.6	122.6	25.9																					13.428
							51.1							28.4	48.375		68.1875				63.8					297.4	15.3	51.5																					23.804
							39.7							233.1	378		60.4375				191.1					25.3	45.1	28.8																					21.057
							62.6							40	78.75		52.75				162.4					413.4	74.7	95.1																					34.79
							231.4							309.8	59.75		30.4375				31					82.8	28.5	129.4																					21.973
							23.9							35.5	17		689				634.8					157.1	53.6	47.1																					17.09
							46.1							80.2	15		353				74.3					317.3	45.1	25.9																					26.245
							41							170.8	258.5		523.062				109.3					73	61.4	31																					36.926
							46.6							55.1	216.125		77.4375				630.6					42.5	16.6	25.2																					14.343
							23.8							228.3	71.125		35				123.8					21.2	42.8	163.3																					12.817
							813.7							49.1	132.75		473.375				36.2					343.8	290.7	58																					16.785
							113							33.9	98.125		539.188				265.1					53.4	91	47.8																					19.836
							72.3							29.4	176		63.625				360					266.1	377.5	60.3																					25.635
							327.5							31.3	155.625		61.6875				180.8					187.8	9.2	49.8																					11.597
							106.4							59.9	2.625		139.688				55					72.5	224.5	33.4																					11.902
							8.6							15.3	33.875		104.438				0					243.7	41.9	50																					27.771
							126.2							36.4	105.125		139.062				100.5					85.2	342.9	104.1																					22.583
							151.1							31.7	30.375		51.125				69.8					722	19.5	191.5																					11.292
							349.5							14.4	79.5		539.875				113.8					214.3	513.3	70.2																					23.804
							9.3							41.8	30.25		130.938				72.3					167.8	155.3	45.3																					11.292
							98.7							255.1	18.5		90.5625				223.5					239.6	95.4	299.3																					23.804
							220.7							544.8	213.875		19.125				157.5					205.7	58.5	51.3																					10.986
							427.3							168.6	47.625		65.875				62.1					135.7	275.6	64.7																					20.752
							526.9							89	116.625		154.125				42.4					123.2	69.3	92.4																					18.005
							219.1							121.3	3.875		88				225.7					120.8	16.2	24.1																					37.231
							31.9							49.2	40.75		905.812				306.9					456.9	19	147																					19.226
							107.6							128	72.25		151.562				383.3					66	18.1	147.5																					28.076
							305.8							76.3	291		165.438				79.7					537.4	164.3	111.8																					20.752
							261.1							109	76		121.312				199.7					237.4	273.4	82.2																					12.207
							19.8							93.9	18.375		76				103.9					25.3	140.1	43.6																					21.667
							324.9							182.8	185.625		69.375				462.2					97.4	180.7	92.9																					11.902
							35.8							127.5	189		286.5				44.4					97.4	52	85.2																					13.733
							217.6							270.4	28		277.812				553.8					191.2	145.6	57.2																					14.954
							86.7							177.3	90		119.688				0					96.9	132.4	50.4																					19.531
							402.8							59.8	139.5		16.6875				112.8					80.2	26.7	347.9																					13.428
							962.4							23.7	80.25		539.625				24.9					112.3	269.1	49.4																					17.09
							73.6							79	80.375		83.875				389.2					240.3	73.6	116.8																					23.804
							81.9							65.7	108.375		122.938				219.3					44.8	53.2	27.3																					43.03
							112.5							106.8	22.375		109.75				73.2					239.4	43.1	41.4																					25.33
							173							156.9	105		495.938				455.5					1045	60.7	51																					38.757
							624.1							285.2	199.25		134.5				218.3					260.4	22.5	214.4																					13.123
							414.1							107.6	20.625		637.875				268.5						286.6	20.4																					30.823
							121.1							30.4	149.25		84.3125				195.5						25.3	72.6																					18.616
							120.4							33.9	115.125		256.625				87						29.4	44.2																					12.512
							90.4							132.1	160.375		18.0625				23						56.7	180.9																					19.226
							132.6							494.3	33.25		540.688				49.7						174	66.8																					23.193
							487.8							146.2	149.375		67.5				489.2						56.1	64.7																					24.109
							388.7							214	18.125		335.812				447.5						68.9	111.1																					27.161
							65.4							118.3	102.875		286.5				142						144.2	109.5																					18.005
							25.6							33.2	282.75		72.6875				220.8						635.3	157.5																					18.311
							28.5							101.3	105.5		258.25				63.4						21.1	112.8																					11.597
							134.5							144	56.5		79				9.8						85.8	52																					19.226
							2.1							93.3	81.75		351.562				100.6						18.4	128.5																					32.959
							488.9							83.1	102.625		240.688				45.8						10.4	67.8																					43.03
							731.1							41.6	69.75		115.938				106.8						15.5	88.2																					16.785
							108.3							144.7	257.25		51				219.4						85.8	80.8																					47.913
							85.6							21	171.75		152.875				153.1						112	79.5																					26.55
							157.2							194.2	52.125		154.812				48.3						128.6	116.9																					31.433
							132.6							34.7	18.125		54.1875				17.8						198.3	54.3																					12.207
							212.2							99.5	56		124.938				11.4						28.5	50.5																					27.161
							207.1							136.6	128		114.25				408.4						41.1	31																					28.076
							98.6							59.3	102.625		133.312				68.9						23.1	57.9																					13.733
							111.2							27.7	146.75		313.188				69						41.4	57.3																					17.395
							714.7							35.5	198.875		88.25				106.3						13.9	22.9																					26.855
							2.1							129.5	64		334.062				312.3						189.6	26.8																					43.335
							56.9							112.5	12.5		286.438				283.9						382.3	70.9																					12.512
							1110.4							83.2	40.75		446				962.3						13.1	34.6																					42.419
							321.8							61.1	99.25		38.875				35.1						21.2	9.9																					10.986
							494							40.9	100.25		118.125				35.3						84.9	97.2																					14.648
							299.8							27.3	23.75		52.6875				41.8						35	17																					14.343
							779.2							386.6	36.75		140.375				85.9						232.9	173																					14.648
							23.4							160.5	70.625		422.438				415.4						52.8	64																					14.648
							69							63.6	102.625		727.25				223						33.5	22.4																					27.161
							43.8							118.3	98.375		88.4375				32.4						29.6	17.7																					12.512
							192.4							31.8	243.625		146.375				320.4						79.3	20.6																					31.433
							312.6							27.4	66		245.812				138						237.5	29.7																					10.986
							49.3							229.5	180.375		85.3125				45.8						23	47.2																					17.09
							426.4							148.2	77.625		591.562				44.6						12.5	19																					24.109
							601.4							191.9	5		66.5				77.7						8.7	59.7																					25.635
							67.9							148.3	139		41.25				270.8						79.5	37.3																					56.458
							282.2							70.9	250.75		508.562				225.3						47.1	89																					38.452
							355.6							25.9	57.625		905				223.1						188.8	156.1																					16.785
							88.2							36.6	63.5		142				368.7						73.3	48.8																					16.785
							283.2							1.7	118.5		249.938				43.2						103.6	1																					36.316
							29.6							160	274.125		610.5				88.4						71.6	41.8																					52.185
							83.4							212.1	181.875						262.7						83.2	353.6																					13.733
							171.6							25.3	26.125						165.4						277.9	29.4																					40.588
							15.1							143.2	22.25						149.5						129.1	72.7																					18.616
							201							60.1	101.125						171.2						3.8	36																					22.278
							236.7							58.5	80.375						176.1						42.2	20.6																					24.719
							451.7							280.4	29.375						13.8						18.3	49.4																					14.954
							20.2							92.4	96.125						35.1						27.7	25.8																					11.902
							89.1							243.7	102.125						144.7						103.7	106.2																					37.537
							17.6							16	46						36.8						189.5	40.3																					25.33
							415.9							104	148.625						73						10.5	85.4																					19.531
							253.4							44.7	80.75						235.7						110.7	76																					10.986
							111.2							208.5	46.25						456.6						12.2	104.7																					13.123
							57.3							74.3	47.25						168.2						56.7	11.2																					10.681
							264.4							108	22.625						273.5						260.5	12.9																					24.414
							382							72.8	157.125						418.5						91.5	119.3																					45.166
							448.8							85	212.75						123.5						9.9	173.2																					26.55
							330.3							190.6	178						266.7						290.9	243.8																					36.926
							153.9							92.1	298.75						23.6						54.6	153.7																					23.193
							870.3							328.3	81.5						45						21.5	169.1																					12.207
							289							353.2	30.875						229.8						26	110.2																					21.667
							4.2							254.7	73.125						52.1						54.5	122																					26.245
							58.7							28.2	109.5						316.3						293.5	332.4																					32.043
							190.7							114.5	100.125						173.3						189.9	69.1																					20.752
							62.2							290.6	55.75						176.6						131.7	106.5																					22.888
							185.2							113	120.625						33.7						123.8	203.1																					30.823
							105.9							197.7	27.25						203.3						19.1	67.7																					17.09
							59.3							137.5	20.75						60.4						137.9	24.8																					12.512
							23.2							101.2	179.5						100						317.9	90.3																					52.795
							47.7							85.6	110.5						275.4						15.2	43.1																					21.667
							480.8							30.8	83.5						691.7						41.1	113.9																					20.142
							11.3							54.5	157.375						448.8						38.3	101.4																					18.005
							16.6							129.8	80.875						84.6						350.1	19.2																					11.292
							346.6							19	100.875						181.2						85.7	91.6																					11.902
							87.4							329	53.5						69.7						286.1	23.9																					15.869
							200.4							199.3	99.375						388.6						44.7	55.6																					16.174
							328.3							124.2	209.125						27.2						109	80.6																					11.902
							2.2							146.9	11.125						202.1						107.3	15.8																					14.343
							461.1							251.4	412.75						89.5						96.2	40.6																					18.616
							200.5							125.9	63.375						100.7						24.8	34.7																					18.311
							26.4							89.9	45.75						48.4						69.5	34.1																					25.024
							275.9							283.1	131.875						168.4						39.7	39.4																					11.902
							42.8							58.8	49.25						253.9						53.3	63.7																					12.512
							8.1							18	71.75						97.5						102.9	44.5																					27.771
							194							26	78.25						306.1						18	63.9																					14.648
							42.8							112.3	28.625						32.9						185.9	42.8																					16.174
							120.6							143	194.125						163.1						67.6	155.8																					15.564
							149.3							66.1	19.375						351.9						179.5	49.4																					31.128
							968.2							60.8	335						137.6						22.2	76.4																					15.259
							726.2							70.7	53.375						36.2						16.1	75.4																					14.038
							262.9							200.2	191.375						93.7						99.7	33.5																					28.992
							147.6							70.9	300.75						542.4						137.9	98																					18.005
							10.1							39.7	15.875						21.8						26.8	14.2																					12.512
							54							30.5	21.875						469.3						159.6	78.5																					20.142
							379.9							97.3	387.375						131.5						38.3	33.6																					15.259
							218.6							208.8	33.25						40.3						189.6	83.6																					13.123
							26.9							273.8	254.75						122.2						197.3	42.4																					36.621
							146.3							66.5	102						388						32.7	65.8																					19.531
							140.6							40.3	134.625						53.2						40	49.5																					19.226
							84.9							21.1	18.375						110.3						109.1	98.1																					21.973
							136							45.2	23.25						69.5						127.8	43.4																					32.043
							193							63.2	296.125						477.8						77.3	145.6																					18.616
							241.7							66.6	158.875						129.9						20.2	44.2																					12.207
							620.5							14	231.5						37.5						23.5	195.6																					27.466
							475.6							69.9	45.25						33						34	132.3																					12.207
							23.5							22.7	33.5						55.6						46.8	58.3																					25.635
							330.6							209.3	123.375						42.3						103.1	52.3																					21.667
							229.8							212.8	47.875						49.6						98.8	5																					18.921
							126.4							58.5	24.375						90.3						187.4	113.1																					12.207
							526.9							13.3	162.125						298.3						142.5	83.7																					26.55
							97.9							268.5	72.375						123						206	94.1																					12.817
							14.9							211.4	108.875						110.9						23.8	54.9																					43.03
							195.4							279.2	218.625						75.5						151.7	168.5																					17.7
							131.5							376.1	80.125						37.7						65.8	92.2																					10.681
							47.4							164.8	118.25						98.2						40.9	120.8																					26.855
							788.1							34.6	118.5												179.5	78																					16.785
							79.5							80.3	29.625												122.8	55.4																					28.076
							48.6							96.6	56.625												9.5	158.9																					11.597
							117.8							30.8	79.25												88.5	86.4																					16.479
							223.6							62.9	26.875												55.5	43																					13.123
							288.4							81	173.375												23.9	111.2																					25.33
							91.8							20.4	177.75												20.4	39.7																					17.09
							110.1							364.3	22.125												192.2	13.5																					33.264
							64.9							64	277.875												15.3	30.2																					19.226
							32.6							59.1	92.375												198.2	76.4																					29.602
							62.4							127.1	364.75												33.9	34.5																					30.212
							129.4							29.3	71												46.7	109																					15.564
							475.4							112.9	269.875												78.1	165.6																					23.499
							30.5							141.6	100												45.6	11.1																					30.212
							38.1							109.2	176												11.4	9.4																					17.09
							195.8							81.2	16.625												19.3	16.4																					18.005
							237.6							168.8	38.875												23.1	334.7																					11.902
							64.2							47.6	18.5												10.5	15.8																					10.681
							202							34.4	31.875												89.4	26.9																					23.193
							461.4							122	43.375												35.1	114.8																					21.973
							37.9							188.3	19.75												43.5	49.3																					15.259
							107.8							146.4	151.125												87.3	269																					14.038
							2.3							667.7	252.875												168.2	16																					18.616
							92.3							35.3	69.75												80.8	48.9																					13.733
							114							43.6	38.75												117.5	246.6																					17.7
							23.4							47.5	35.5												36.7	459.1																					10.986
							646.5							66.6	120.25												34.4	191.1																					18.005
							71.2							427.4	123.25												28	28.6																					20.447
							126.1							228.7	286.5												428.3	21.6																					18.311
							77							37.9	21.5												12.6	84.8																					21.973
							197.9							140.2	161.375												117.4	79.1																					20.447
							372.2							72.2	164.625												110.3	46.2																					23.499
							215.1							241.4	20												212.7	99.5																					32.043
							132.2							165.6	66.375												65.1	78																					16.174
							243.5							148.2	34												67.1	40.2																					12.207
							71.3							111.5	125.125												312.1	59.3																					11.902
							19.1							171.4	17.75												82.9	36																					19.836
							306							18.2	138.75												99.6	188																					32.043
							133.5							42.2	35.25												43.1	217.5																					37.231
							264.4							125.1	269												30.3	39.3																					12.207
							688							10.9	178.25												74.3	32.3																					14.343
							39.7							500.3	26.875												54.8	127.7																					10.986
							290.9							301.2	17.625												85	54																					25.635
							239.3							26.3	87.75												121.1	32																					25.94
							69.3							240.2	214.25												46.3	137.3																					16.174
							46.5							206.6	183.5												34.3	23.1																					23.804
							96.2							88.7	156.75												89.9	16.6																					18.005
							710.7							259.3	84.875												83.9	135																					31.433
							877.5							97.7	128												29.1	36.2																					18.616
							141.3							14.1	148.375												84	79.2																					21.057
							833							102.8	45												58.4	60.4																					20.142
							173.4							266.5	45.375												79.9	18.4																					18.005
							743							30.7	102.125												85.4	25																					17.7
							47.2							15.5	60.25												236.3	50.3																					10.681
							130.1							131.2	147.75												76.5	49.9																					14.343
							388.6							43.7	178.625												132.9	32.6																					11.902
							428.3							344.1	243.875												109.5	334.9																					12.512
							414.2							73.3	81.25												35.9	121.7																					13.123
							263.5							40.6	125.25												58.8	130.9																					19.226
							149.4							39	68.75												16.5	64.2																					61.035
							273.7							63.8	247.25												246.2	178.3																					36.011
							76.9							20.9	119.75												170.5	27.2																					14.954
							33.4							24.9	36.75												150	128.6																					12.207
							46.1							109.7	66												37.6	32.4																					10.681
							12.1							28.3	15												12.8	64.8																					10.986
							208.1							143.3	235												82.5	38.9																					26.855
							107							169.4	188												48.4	22.7																					39.063
							228							101.9	95.5												16.1	103.6																					21.057
							11.7							12.6	45.25												119.5	116.1																					25.635
							194.6							27	162.375												42.7	42.4																					14.343
							396.8							51	106.375												304.9	134.8																					36.926
							164.1							165.2	52.5												42.4	77.6																					20.447
							10.8							125.8	91.375												82.3	129.6																					32.959
							62							59.4	322.125												12.5	1.4																					15.564
							211.9							98.2	20.375												36.2	95.4																					20.752
							184.6							289.3	11.25												15.4	58.4																					73.547
							170.4							148	48.875												26.4	57.1																					12.512
							145.4							76.7	160												81.6	58.1																					46.082
							455.6							147.2	97.75												86.9	162.9																					16.479
							41.6							369.1	45.25												37.2	67.7																					27.466
							25.2							105	62												36.4	17.6																					19.836
							512.1							43.3	151.5												72.9	21.9																					12.512
							87.2							28	58.25												138.1	27.8																					13.428
							143.2							37.6	85.125												143.4	97.7																					21.057
							201.2							151.6	180.875												111	42.1																					19.836
							41.2							37.4	122.875												96.2	78.9																					23.804
							89.4							242.4	94.5												20.4	44.4																					14.038
							172.6							16.4	47.375												92.9	54.2																					29.297
							58.5							228.8	93.5												113.5	49.8																					10.681
							136.7							85.6	14.625												21.6	45.3																					11.902
							10.5							148.1	205.625												36.9	150.1																					50.659
							202.5							118.8	81.25												180.2	158.6																					33.569
							223.2							42.7	307.875												438.7	171.6																					14.648
							201.4							292.6	90												33.9	61.9																					26.55
							229.5							88.3	194.875												17.7	245.7																					34.18
							168.7							125.6	144												114.8	14.2																					15.869
							149.1							40.7	65.25												90	47.4																					13.123
							398.2							75.5	14.875												125.7	55																					10.986
							244.7							27.6	53.25												19.3	38.2																					11.292
							82.4							163.9	89.375												20.4	69.7																					38.147
							94.7							283.1	98												142.9	119.9																					14.648
							339.9							22.6	347.125												121.4	52																					12.817
							289.7							14.1	77.25												58.4	24.2																					11.597
							37.6							70.6	108.125												112.9	114																					21.667
							39							30.6	136												43.1	155.2																					14.343
							1.6							210.8	10.625												13.9	21.7																					18.616
							422.7							153	0.75												147.3	39.1																					14.343
							13.1							41	79												80.1	41.5																					22.583
							91							32.2	64												66.4	51.7																					36.926
							297.9							15.2	25												35.4	57.8																					21.057
							542							124.2	30.125												223.1	66.7																					10.986
							191.1							271.3	218.625												54.2	13.3																					19.226
							24.6							37.2	78												245	20.5																					11.597
							119.3							39.2	195.125												20.1	19.5																					25.635
							86.7							57	199.375												95.2	34.3																					40.588
							99.9							28.3	149.875												60.4	34.1																					11.597
							30.3							103	22.5												34.2	10.4																					12.207
							29.9							250	38.25												26.7	36.5																					12.512
							59.4							48.9	23.625												110.1	10.5																					32.654
							82.2							41.1	50.5												27.5	142.5																					17.09
							190.9							172.8	154.625												105.5	9.9																					14.648
							384.9							67.9	143												26.2	52.8																					21.362
							437.2							71.4	110												132.5	25																					10.681
							61.5							62.3	182												470.4	64.1																					10.681
							62							80.5	95												39.4	18.9																					28.992
							242.1							185.9	61.75												123.8	114.3																					23.804
							146.9							384.2	3.25												17.7	63.9																					14.038
							5.8							43.5	78.75												83.1	184.5																					10.681
							365.3							71.9	51.5												219.6	156.2																					33.264
							332.6							86.7	52.5												45.9	42.6																					26.245
							185.4							34.1	136.25												20.7	12.5																					38.452
							320.4							156.6	76.125												56.3	21																					11.902
							348.9							51.9	159.5												59.1	59.6																					24.719
							109.1							258.1	37.375												15.5	44.2																					28.687
							19.4							39.8	33.625												361.8	120.3																					25.94
							330.7							48.9	42.25												106.8	21.7																					16.479
							317.2							101.2	60.625												29.7	20.6																					18.616
							96.4							30.6	98												125.9	17																					12.207
							51.6							236.2	110.125												47.9	26.1																					15.564
							30							48.6	72.25												50.7	42.5																					38.757
							39.2							170.4	82.5												165.5	15.7																					15.564
							36.9							116	27												58.8	86.4																					20.447
							358.6							9.5	148												19.2	11.3																					26.55
							522.2							34.2	55.875												31.5	41.8																					20.447
							417.3							225.7	57.5												145.9	43.7																					22.888
							291.2							470.2	32.375												78	41.4																					10.986
							126.1							88.2	19.875												30.4	78.7																					11.292
							53.7							132.8	41.625												43.3	34.7																					12.207
							881.8							118.9	133												7	88.9																					14.343
							112.7							47.4	64.5												200.6	107.2																					20.142
							373.8							29.2	50.125												15.4	32.5																					14.038
							118.4							249.6	56.75												226	57.2																					11.597
							59.7							42.3	39.125												37.3	22.2																					30.518
							276.8							291.1	114.125												44	12.7																					28.687
							30.6							72.6	121.25												81.8	171.4																					10.681
							369.8							19.9	173.75												79.3	87.9																					19.226
							182.1							138.6	213.75												7.9	78.3																					14.343
							38.6							25.8	224.75												254.1	50.2																					15.869
							81.1							169.8	98.5												34.5	8.1																					29.907
							1037.8							111.9	44.75												6.7	55.3																					26.855
							68.8							145.2	151.375												242.7	23.8																					17.7
							221.2							89.2	295.875												31.4	70.4																					33.875
							123.4							166.4	401.875												167.1	104.8																					25.024
							63.1							74.5	58.25												86.4	10.4																					16.479
							331.7							50.2	120.375												90.7	16.5																					16.785
							12.2							145	18.375												196.8	24.1																					27.771
							273.7							12.3	107.875												28.3	67.2																					16.174
							268.8							176.7	48.875												14.8	93.4																					14.648
							301							336.7	28.875												42.8	17.5																					12.207
							83.7							187.5	147.5												124.1	85.2																					21.057
							147.5							36.4	226.75												95.4	51.1																					62.561
							488.3							17.3	80												83.9	93.3																					15.259
							115.5							132.9	24.5												13.4	95.9																					15.259
							34.8							8.5	22.75												107.5	91.5																					47.607
							465.6							325.1	181.875												36.1	18																					21.362
							70.1							544	17.375												20.3	9.6																					20.142
							442.9							86.8	31.625												20.8	38.7																					21.667
							166.9							48.9	69.875												86.2	68.4																					47.913
							105.4							41.4	41												49	98.6																					14.954
							76.1							209	30.25												295.1	104.2																					21.362
							450.4							120.9	162.125												159.1	103.8																					11.597
							149.3							210.1	156.25												27.3	17.3																					19.226
							1.2							259.1	1.75												81	75.3																					29.907
							64							91.5	196.125												34.1	190.3																					14.954
							23.6							93.4	3.625												360.5	80.8																					29.907
							25							120.4	110.875												300.7	89.4																					32.959
							1.2							839.2	52												75.6	58																					34.79
							178.2							106.6	96.5												225.9	33.8																					25.024
														254.2	66.375												214	27.7
														30.5	158												40.4	43
														235.3	38.625												107.6	121.8
														126.7	51.875												43.3	53.1
														135.1	411												30.9	377.5
														441.8	27.125												292.1	35.9
														48.9	48.875												184.8	43.7
														13.2	3.25												29.7	328.4
														171.2	15.375												107.3	10.9
														370	413.625												179.5	29
														213.5	14.375												5	95.4
														296.5	60.25												211.8	244.5
														89.6	80.875												40.1	50.3
														99.8	60.125												192.6	34.6
														447	116.125												29.1	46
														696.5	42.625												20.1	17.2
														123.2	220.5												42.1	98.8
														332.3	152.875												93.8	98.6
														20.8	37.25												25.8	284.4
														153.8	55.375												139.9	21.1
														47.4	34.875												51.4	13.3
														142.6	9.75												37.2	52
														378	28.25												23	62.4
														53.9	84												139.1	25.1
														1.8	140.375												35.5	45.6
														202.5	54.75												149.1	154.7
														28.4	92.25												188.8	109.1
														151.3	130.25												49.4	62.5
														26.1	115												188.3	53.4
														374.3	63												229.1	231.1
														11.1	143.25												36.1	243.8
														250.3	17.25												91.9	43.2
														225.4	88.25												26.8	85.5
														116.1	213.5												65.6	65.7
														15.7	149.75												70.3	22.1
														127.7	61												116.7	69.8
														52.3	118.25												58.2	81.8
														176.5	195.25												320.6	135.9
														89.5	18.625												143.7	30.4
														66.4	51.875												34.5	322.1
														199.3	101.125												63.9	45.7
														310.4	157												55.4	5.9
														97.7	157.875												305.7	39.9
														214.7	74.875												81.2	70.9
														94.8	104.5												137.6	30.2
														43.3	128.625												212.7	111.8
														122.5	40												110.7	22.5
														13.3	27.75												24.2	110.7
														77.7	88.375												42.2	223.6
														281	51.875												18.1	44.9
														63	188.5												8.8	9.6
														122.2	38.5												88.9	147.3
														13.9	69.125												145.4	28.1
														41.1	34.375												112.8	49.4
														34.8	60.875												58.3	61.6
														58.8	224.25												64.5	82
														125.4	53.75												18.6	96.8
														71.5	28.5												20.9	52
														26.5	94.875												105	45
														43.7	92.25												16.9	215.5
														57.6	52.375												35.8	54.7
														8.8	117.375												44.4	285.5
														177.6	42.75												246.8	10.3
														122.9													151.8	28.4
														80.9													121.3	67.4
														73.2													82.5	17.1
														200.1													27.3	26.1
														56.9													102.2	108.2
														101.5													49	35.4
														112.2													6.8	85.6
														86.2													59.5	84.1
														1.4													527.1	39.5
														70.8													63.8	74.2
														43													226.9	55.3
														122.4													178	7.3
														92.3													341.5	17.5
														54.3													35.6	152.1
														131.4													631.2	9.6
														76.4													29.1	170.4
														41.9													55.3	36.7
														166.4													475.6	10.5
														81.1													164.6	33.3
														54.1													278.4	74.5
														40.7													73.3	140.2
														72.9													130	12
														64.7													72.5	103.7
														96.5													90.6	119.2
														75													256.2	17.8
														75.5													103.5	54.7
														131.5													35.7	78.4
														55.3													12	79.1
														203.9													31.2	37.2
														204.6													144.5	104.2
														136.6													19.4	66.7
														49													100.9	124.4
														82													156.3	167.8
														57													16.2	42.5
														60.4													39.6	29.9
														217.9													175.7	11.1
														342.8													33.1	137.7
														56													28.3	6.6
														293.1													172.6	58.4
														103.4													59.8	174.4
														58.4													150.4	154.7
														187.1													70	24.5
														72.9													75.3	45.2
														461.5													25.2	90.3
														15.9													257.6	29.5
														216.9													61.9	80
														145.8													117.1	54
														15.2													161.8	12.5
														106.9													79.6	81.9
														70													44.4	19.1
														31.5													101.9	18.6
														84													52.9	16.7
														112.7													166.3	71.7
														45.5													159.9	77.4
														47.7													72	77.1
														37.4													151.3	90.8
														121.8													131.5	132.2
														211.1													111.6	88.9
														163.2													110.7	62.8
														22.3													125.3	469
														98.9													27.8	60.4
														53.3													79.9	163.1
														68.3													223.2	63.1
														37.4													295.7	86.6
														213.1													67.6	44
														13.7													104	36.8
														60.6													477.7	32.6
														351.5													70.9	132.9
														145.2													95.6	69.5
														196													87.4	47
														22.5													289.7	61.7
														120.8													83.4	28.2
														32.4													53.4	94.2
														26.4													255.8	139.2
														48.6													146	10.3
														231.8													109.5	11.1
														49.3													113.7	136.1
														70.2													65.6	12.8
														270.9													324.6	36.9
														55													42.4	71.8
														75.8													179.7	24.2
														185.5													39.5	27.1
														25													193.9	135.4
														58.7													45.2	93.4
														35													260.1	59.6
														44.1													62.9	17.2
														145.6													9.4	69.4
														152.6													179.7	62.7
														225.3													56.5	100.9
														27.3													207.2	10.7
														41.2													233.3	28.1
														82.6													110.3	35.6
														194.3													13.7	32.6
														127													79.6	85.2
														158.2													218	76
														248.6													137.7	173.5
														128.3													37.5	68.8
														189.5													98.6	98
														250.8													129.1	178.5
														139.5													128.1	36.9
														207.8													52.7	33.2
														84													42.6	8.2
														68.2													35.3	42
														160.3													134.1	60.3
														44.9													27.2	21.7
														229.2													40.5	63.3
														52.4													72.5	44.6
														50.4													36.9	14.8
														149.2													107.2	161.5
														345.1													288.5	14.6
														33.7													54.3	30.1
														53.6													200.2	96
														69.8													93.7	76.5
														240.3													359.3	30
														44.9													22.4	93.7
														152.7													91.3	50
														42.2													300.4	71.9
														214.6													210.5	14.5
														62.9													191	92.6
														171.4													354.7	92.9
														37.4													66.3	17.1
														28													64.3	95.1
														216.2													235.4	11
														329.3													43.7	119.1
														8.7													91.4	91
														213.5													26.2	36.4
														171.1													158.5	130.3
														135.1													82.9	41
														59.1													113.2	9.4
														37.8													308.2	180.1
														37.1													412	55.5
														31.6													49.5	20.8
														627.2													7	27.6
														62.9													77.7	17.6
														18.5													180	39
														89.7													81	55
														55.8													22.3	20.2
														152.2													27.1	129.8
														246.3													99.3	9.5
														12.5													60.9	121.6
														25.9													65.7	16
														303.3													30.6	32.5
														256.7													56	34.5
														19.5													85.6	79.3
														201.5													58	265.8
														485.7													46.4	43.3
														33													15.4	79.8
														185.6													177.2	80.5
														905.8													37.6	189.1
														40.6													58.6	20.4
														57.9													179	39.9
														305													32.1	24.4
														108													101.1	51.4
														80.5													68.8	78.5
														83.5													248.5	5.6
														37.6													36.3	33.7
														117.6													69.5	109.9
														29.6													15.1	63
														26.3													46.2	99.9
														366.7													214	20.4
														234.4													91.3	68
														241.3													26.7	104.9
														184.9													7.1	26.4
														149.3													125.3	143.8
														179.8													99.2	10
														159.1													11.7	36.3
														12.6													274.9	26
														624													455	75.1
														174.9													225.8	74
														90.3													44.3	70.9
														418.4													152.2	107.4
														167.7													101.1	177.6
														101.2													299.5	25.1
														16.5													190.7	107.2
														10.9													150.6	86.3
														210.3													11.9	167
														206.2													122.7	57.4
														260.1													18.6	429.9
														153.7													214.1	142.4
														130													15.6	40.1
														8.2													18.7	91.7
														45.5													102.3	46.9
														79.5													5.8	203.6
														155.5													212.4	12.4
														303.3													234.4	27
														153.9													64.5	37.6
														38.7													73.4	12.4
														27.5													186.1	12.6
														577.5													153.9	46
														96													37.8	67.5
														6.2													21.5	11.1
														13.6													137.3	190.3
														279.6													38.9	59.9
														33.3													72.9	41
														134.2													110.2	152
														366.4													14.6	93.6
														47.5													226.1	159.7
														52.5													116.2	40.9
														131.6													171.1	39.4
														484.7													85.4	105.3
														410.1													195.2	155.4
														259.6													272.4	61
														68.7													12	196.9
														273.1													246.9	27.6
														156.5													99.3	30.2
														130.4													15.9	104.8
														463.1													35.4	40.7
														270.3													26.8	35.9
														180.8													71	31.2
														394.6													28.3	105.4
														715.7													52	28.4
														100.7													83.3	20.4
														223.5													52.6	34.2
														1377.8													50.4	32.1
														232.4													17.6	154.3
														753.1													53.3	1.2
														151.1													17	41.9
														295.9													7.8	30.6
														524.9													63.9	142.2
														843.9													19.7	303.7
														967.7													87.2	263.6
														139.2													46.9	28.2
														153.2													88.6	29.6
														489.1													84.1	100.6
														20.9													248.1	61.8
														205													119.3	142.7
														233.1													58	77.1
														115.2													9.9	46.8
														89.8													176.2	50.7
														347.8													82.5	26.8
														92.3													24.6	8.4
														477.6													18.4	19.8
														46.6													152.6	75.1
[truncated: 2,124 more rows]
[truncated: 25 more columns]

## Sheet: Figure 3D
Cumulative probability of inter-event interval in the CeA-PKCδ neurons																																sEPSC frequency in the CeA-PKCδ neurons										Cumulative probability of amplitude in the CeA-PKCδ neurons
Individual data showing the inter-event interval (ms) of each cell																																Individual data showing the sEPSC frequency (Hz) of each cell										Individual data showing the amplitude (pA) of each cell
Ctrl										MP																							Ctrl			MP						Ctrl
cell 1	cell 2	cell 3	cell 4	cell 5	cell 6	cell 7	cell 8	cell 9		cell 1	cell 2	cell 3	cell 4	cell 5	cell 6	cell 7	cell 8	cell 9	cell 10	cell 11	cell 12	cell 13	cell 14	cell 15	cell 16	cell 17	cell 18	cell 19	cell 20				cell 1	8.31		cell 1	0.64					cell 1	cell 2	cell 3	cell 4	cell 5	cell 6	cell 7	cell 8
57.5	620.2	17.3	52	881.3	56	76.7	2381.5	44.4		72.6	120.1	842.3	789.4	650.8	3395.3	177.9	217.1	1089.9	7847	163.1	163.1	686.8	377.7	1408.9	223.4	509.2	421	94.2	723.9				cell 2	3.5		cell 2	2.23					11.597	14.038	22.583	11.597	23.193	15.259	14.648	8.545
28.7	109.9	82.1	96.5	512.7	48.5	546.5	519.5	719.9		37.4	188.2	457.1	531.7	281.7	746.8	265.6	404.6	313.4	76.8	203.5	60.1	161.4	752	1248.5	38.3	498.4	103	106.8	207.5				cell 3	4.96		cell 3	3.96					14.648	7.629	21.362	28.076	9.46	17.7	9.46	8.24
488.9	126.4	43.6	45.4	209.5	286.9	314.8	502.8	867.7		706.3	94.3	3650.4	1474.5	198.6	2239.5	643.9	524.5	1000.9	513.6	286.2	45.4	732.7	48.3	297.3	196.6	1757.4	15.7	315	648.5				cell 4	8.66		cell 4	1.69					16.785	16.785	28.992	18.005	11.597	12.207	22.888	8.24
98.7	107.8	60.3	26.5	51.7	32.8	83	212.5	13.3		132	98.5	833.3	985.5	59.3	135.4	741.8	85.4	299.4	7348.2	471.7	439.6	48.2	301.7	1008.8	241.2	227.1	80.1	93.6	360.8				cell 5	2.6		cell 5	2.04					25.024	7.324	13.428	7.935	12.207	10.986	9.155	10.986
125	491.4	96.1	71.4	82.2	358.5	2433.2	607.1	479.4		525.1	197.5	77.5	282.4	109.6	1224.9	469.1	194.2	2817.4	3091.1	145.3	218.6	230.4	507.8	743.6	197.4	1388.9	59.2	234.6	189.6				cell 6	1.35		cell 6	3.72					13.733	23.499	23.804	70.496	16.785	39.063	33.264	10.071
118.7	176.1	92.3	353	173.8	15.9	217.1	1562.4	19.8		766.4	751.1	250.5	455.5	199	2447.9	830.8	34.7	679.2	4059.3	269	196.5	546.2	249.5	181.4	1079.2	466.9	682.1	975	357.1				cell 7	5.66		cell 7	0.56					22.888	7.629	11.292	12.817	13.123	11.902	18.005	9.155
243.9	1009.7	49.7	38.6	172.4	39.8	241.8	305.9	228		499.3	453.9	2191.2	158.6	147.7	776.3	414.4	955.2	777.4	2593.1	119.1	74	1066.2	377.8	745.6	95.6	1223.1	236	77.4	1394				cell 8	7.67		cell 8	3.95					12.817	17.09	10.071	19.836	9.46	13.733	10.376	9.155
21.6	13.5	143.6	163.9	19.9	63.5	873.6	126.2	749.7		100.3	479.8	282.5	769.2	147.1	1241.5	57.9	19.2	83.2	105.4	265.9	395.6	1309.7	525.3	1637.8	17.2	888.6	421.9	202.1	373.3				cell 9	2.87667		cell 9	1.78					10.376	7.935	20.447	26.245	10.986	20.752	22.888	10.681
180.6	394.8	91.7	49.4	189.4	40.2	184.7	976.2	549		412.2	475.5	648	747.5	578.1	801	850.7	170.6	3945.4	3473.3	142.6	394	133.3	606.8	709.4	555.6	56.6	155.3	98.1	104.1							cell 10	4.22					12.512	7.935	12.817	10.071	9.155	20.447	11.292	55.237
78.8	894.9	91.1	79.7	45.9	170.9	861.5	793.1	239.6		116.5	57.3	744.4	1064.9	58.2	997.1	1508.4	154.4	523.6	2835.3	105.1	45.5	685.7	393.5	1544.2	1230.7	1044.5	86.9	1285.2	168.3							cell 11	3.63667					15.564	16.479	21.057	22.278	14.648	21.973	8.85	42.419
108.6	145.6	326.3	20.3	304	175.8	494.1	1012.1	138.2		151.6	56.6	740.6	307	358.2	1751.6	307.7	256.9	1189.9	5337.5	71.7	124.3	240.3	408.7	1005.9	302.5	631.5	103.3	1312.1	437							cell 12	3.15					11.597	18.921	11.902	13.428	12.512	9.766	11.292	8.545
203	826.9	87.9	114.2	1232.8	58.8	652.3	194.3	467		148.5	39.6	156.6	192.1	792.2	185.1	245.5	203.1	573.9	1230.4	789.7	165.5	1646.1	265.5	1243.1	260.2	428.7	309.2	999.4	129.4							cell 13	1.86667					22.583	16.785	24.109	19.836	8.545	12.512	29.297	19.531
341.6	876.6	159.5	97.2	100.6	36	35.6	96.7	104		208	153.1	138.1	449.6	60	1459.3	115.7	300.4	91.1	1651.3	123.7	435.7	1069.1	685	126.9	619.4	4806.4	21.1	652.3	751.1							cell 14	0.7625					13.733	7.019	12.817	21.362	6.714	9.155	9.155	10.376
58.5	425.3	112.3	331.6	510.1	128.3	276.6	1946.9	78.2		166.7	39.6	138	186	873.3	550.5	102.7	22.3	34.7	934.6	44.7	124.7	254.3	1109.5	40.6	152.5	704.3	34.3	41.6	224.7							cell 15	2.76333					15.259	11.597	21.973	14.954	8.85	36.011	15.259	14.343
108.1	269.9	120	116.6	133.3	1.1	34	51.1	178.6		751	121.7	608.6	353.3	42	859.2	322	195.4	359.1	171.3	32.2	61.4	86.9	30.7	927	34.1	10.1	653.8	1883.5	301.1							cell 16	0.98333					11.597	8.24	12.512	8.545	16.174	36.621	10.071	16.479
80.7	357.6	27.5	103.8	1567.1	31.2	116.5	1958.1	1999.5		119.4	283.3	280.2	318.5	694.2	22.8	131.2	53.2	1987	8526.7	119.8	632	57.3	1008.8	394.3	578.3	410.6	384.3	755.8	350.7							cell 17	2.79667					14.954	10.376	13.123	18.005	11.902	16.479	11.902	13.733
88.9	201.7	353.6	98	83.9	95.4	336.9	610.3	249.7		93.1	14.7	542.3	654.7	11.7	1716.6	345.9	74.7	402.5	5016.5	243.5	141.3	34.5	1140	450.5	527.2	569.7	184.4	400.3	152.6							cell 18	1.90333					11.292	6.714	7.019	10.986	16.785	18.005	9.155	10.681
46.4	432.6	12	148.6	95.6	16.5	27.3	698.8	52.9		146.4	49.7	825.5	628.4	121.5	499.5	164.4	19	614.5	9017.7	226.5	53.7	161.2	90.2	750.5	378.7	59.3	124.3	252.2	187.3							cell 19	3.10667					12.207	11.902	20.752	20.447	8.85	21.057	8.85	8.24
18.3	537.9	167.8	27.6	422.3	71.3	51.6	433.8	115.1		152.3	98.6	414.4	228.4	775.8	1858.7	23.6	38.4	3152.6	2254.5	74.4	127.9	665.7	63.5	539.8	558.3	390.6	489.3	884.9	543.3							cell 20	0.35					9.46	23.804	8.545	21.362	8.545	18.921	13.428	8.24
4.8	462	324.3	58	480.9	435.3	143.3	852.9	121.2		32	266.1	407.4	1315.9	95.1	1577.3	33.3	220.9	3409.7	9738.1	257.5	254	354.3	93.8	2501.5	286	2196	429	892.4	233.8													13.123	14.038	27.771	26.855	21.667	16.174	13.733	10.376
29.4	120.5	161.9	0.1	111.9	99.1	310.5	211.6	347.8		73.3	624.7	147.5	1240	68.4	95.7	393.5	47	764.6	5512.8	313.4	25.8	59	2314.5	2994.5	857.3	2192.6	61.4	715.6	113.9													13.733	7.629	14.038	26.855	26.55	15.564	33.264	17.7
90	229.1	44.4	90.4	142.7	150.8	116.5	390.3	147.5		229.2	57.3	69.2	346.6	499.6	290.8	955.4	46.9	25.8	3408.5	468.4	78.8	1625.3	151.2	1309.7	725.7	2853.4	259.5	9.9	174.6													9.766	13.733	23.193	10.986	8.85	18.005	18.616	7.935
209	10.1	97.6	140.7	268.4	90.4	563	149.4	602		230.5	94.5	1042.1	437.8	170.9	1163.1	327.9	180.6	209.9	228.2	1121.1	67.5	1023.6	49.1	1603.8	233.5	117.1	203.5	485.2	123.3													12.817	26.245	7.019	15.564	11.292	14.954	8.85	9.46
24.6	160.2	33.2	57.4	486.7	178.6	64.6	1263	665.3		474.5	417.9	4507.3	1731.3	238	2289.2	84.3	51.8	951.3	302.3	31.3	473.5	417.2	823.5	246.1	262.9	99.8	133	841.8	91.9													10.681	9.155	35.095	10.986	19.226	25.635	25.33	9.46
94.6	67.5	77.3	156.9	1161.5	33.6	145.4	1428.9	204		367.7	708.6	84.1	504.2	241.8	478.5	262	178	378.8	706.4	23	78.3	130.9	285	97.3	586.2	418.7	463.2	1216.2	48													25.33	25.33	19.836	28.687	12.207	18.616	16.479	96.741
78.5	1143.5	128.4	123.9	95.1	119.7	320.8	1527.3	247.4		397.1	314.6	377.8	497.1	277	418.7	990.5	1247.5	554.3	909	235	269.6	94.1	335.6	112.8	445.9	482.4	289.4	180.9	512.3													18.311	14.648	20.142	52.49	12.817	14.648	10.071	10.071
41.5	307.7	131.9	23.7	84.3	32.2	220.2	721.7	65.7		764	447.4	921.8	66.7	312.5	456.9	879.9	477.8	24	311	142.5	283.4	312.8	147.2	37.3	412.2	770.4	559.3	34.7	37.4													9.766	17.7	12.207	28.687	6.714	20.752	10.071	8.24
57.6	246.7	20.6	577.9	129.8	177.6	431.5	1547.2	404.3		78	40	361.9	797.8	282.3	3324.3	134	122.7	331.1	389.9	139.3	702.8	167	388.3	150.3	533.2	217.5	47.2	294.4	21.9													48.218	12.207	11.902	21.667	14.648	24.414	21.362	26.855
79.2	157.3	33.4	88.4	169.9	116.1	15.9	502	125.4		176.4	517.4	142	216.2	119.6	141.2	40.1	302.8	432.7	2465.5	215.8	75.5	251.7	1023.4	137.4	136.5	1168.4	132.6	1015.3	95.6													11.902	11.292	22.278	12.207	9.155	13.733	19.226	11.292
427.4	63.3	101.9	257	160.6	102.3	1923.9	279.9	318.8		67.9	243	653.9	13	64	506.1	33	111.5	1835.8	4012.9	240	512.5	2057.7	220.2	232	213.8	80	39.1	788.4	14.5													10.986	8.85	8.24	28.992	9.155	28.381	14.343	14.038
16.5	257.5	35.2	147.1	107.8	276.7	439.1	71.9	932.7		19.7	63.8	175.6	249.2	327.6	966.9	765.5	70.7	2696.6	1125.1	37.3	119.7	114.7	718.6	626.5	482.1	3151.4	235.6	546.4	28.1													17.09	9.155	11.597	8.85	21.362	11.902	18.616	14.648
44.2	437.7	119.1	49.3	49.8	256.2	1344.7	600.5	263.3		613.8	371.2	1160.9	322.6	169.3	921.8	243.6	1052.6	995.5	4524.9	20	49.8	463.2	156.7	3923.1	197.6	249.7	941.1	2236.6	259.9													12.512	10.986	13.428	10.986	8.85	9.155	22.278	11.902
7.3	632.8	29.4	346	483	94.2	38.2	190.6	34.5		120	630.7	302.5	59.1	430.8	943.4	56.7	106.9	3036.6	332.2	230.8	23.9	128.5	222.2	1572.6	2078	205.5	67.3	82.1	882.5													14.648	9.46	14.648	15.564	10.071	23.193	14.343	18.311
84.2	71.5	23.9	21.2	203.4	191.9	248	1712.9	87.5		590.4	246.1	916.3	113.5	999	383.8	459.7	301.2	2327.6	1624.2	206.2	163.9	92.7	742.2	395.8	1215.1	85.7	99.5	200.5	227.9													13.733	10.071	18.921	38.147	18.921	22.888	31.128	13.733
144.3	155.5	206.7	38.3	154	57.8	64.3	89.2	308.2		117.1	31.7	1157.5	1038.4	24.4	109.3	718	296.4	1436	1110.5	73.1	89	679.4	426.3	3412.9	447.9	480.1	930.8	60	491.4													31.738	19.226	19.836	12.207	8.85	9.155	30.212	10.376
242.6	36.4	151.6	107.7	228.2	246.9	255.3	288.6	49.4		108.3	436.4	729.5	922.2	550	865.3	97.8	168.5	586.1	1468.5	238.4	23.3	71.9	703.2	602.9	213.3	1441.3	111.1	70	498.3													11.292	16.174	8.24	20.142	14.648	20.142	19.531	13.733
355.8	234.3	26.3	188.8	132.7	107.1	148.3	1769.6	75		97.3	262.5	427.4	421.4	184	99.1	505.2	58.9	196.7	2494.5	189.9	101.3	226	391.1	1102	1270.2	70.8	200.1	433.9	529.1													30.212	7.629	7.935	27.161	18.005	21.362	17.395	10.986
179.2	36.7	42.8	210.8	157	206.1	224.9	158	610		21.8	179.7	815.3	406.1	386.3	221.1	688.6	304.9	2450.7	1775.8	45.4	111.7	396.7	1167.9	6222.3	364.9	1047.9	197.1	2125.9	99.1													10.376	11.292	8.545	18.616	6.714	14.954	19.836	17.7
28.7	146.5	62.2	17	482.2	16	103.9	97.2	800		392.1	48.1	498.1	317	630	4825.7	916.4	33.1	1632.9	1322.4	109.9	234.1	61.9	270.2	687.4	244.5	4211.4	326.3	505.2	19.4													16.174	11.597	29.907	25.635	31.128	15.869	9.155	10.071
90.2	717.8	38.8	103	862.6	230.8	554.9	1171.5	159.2		78.1	132.7	1022	1292.7	345.6	3443.3	253.1	12.4	1816.7	8020.4	17.3	139.6	2316.7	18.8	1077.4	487.5	48.8	304.6	180.8	32.8													10.071	12.512	9.766	16.479	13.428	16.479	13.123	11.597
106	880.6	206.3	223.8	286.8	359.7	587.6	137.9	293.8		645	300.7	126	170.4	231.7	430.9	129.5	322.3	112.3	1640.4	354.6	62.8	411.4	1419.9	2077	324.7	143.4	295.7	2183.4	511.7													16.785	18.616	10.071	75.073	8.85	25.94	15.564	8.24
282.9	198.6	62.1	167.6	156.1	27	66.7	269.7	687.1		53.4	556.9	336.3	1032.3	178.8	1316	131.2	865.8	1183.2	3802.2	152.2	62.8	244.4	252.2	2291.8	592.5	157.5	1187.5	191.2	261.4													15.564	14.954	7.629	8.545	7.019	16.479	10.986	25.94
29.8	268.5	80.6	201.6	417.6	301.4	13.3	173.7	273.5		17.8	728.5	1468.3	162.3	298.2	599.8	121.2	225.9	296.5	2307.9	405.8	137.1	225	234.8	6797.6	210.4	2328.2	306.8	317.8	39.8													15.869	18.311	25.635	21.362	7.019	28.687	11.597	9.155
96.8	452.5	110.4	54.5	297	16.8	275.9	2660.2	424.1		120.6	25.1	1717.4	236.3	253	1130.2	198.4	239.1	175.5	5052.6	15.1	696.4	595.5	215.9	2113.7	104.1	4466.7	227.9	213.6	124.4													9.46	11.902	15.869	14.648	6.714	27.466	14.954	8.545
26.7	277.6	27	39	98.5	79.7	311.8	407.2	450.6		626.1	18.2	901.1	28.7	89.4	1270.8	844	232.9	2086.5	863.5	45	128.4	924.1	586.1	253.1	233.8	1640.6	71.6	1022.3	21													27.771	13.123	24.109	14.038	13.123	26.55	36.926	21.362
39	42.4	38.4	204.5	75.1	41.6	240	631.2	169.2		423	416.7	719.7	1939.6	97.3	136.9	576.8	806.1	92.1	1159.7	256.7	80.7	845.4	132.3	180.8	442	542.7	54.2	2464.3	803.6													31.128	17.09	11.597	11.292	8.24	14.038	13.428	65.002
250.3	237.3	11.4	138.3	326.9	141.4	24.7	938.9	84.8		285.4	40	478	419.5	504.4	647.1	167.3	130	544.4	2387.5	484.4	85.7	847.1	28.5	1675.3	275	5145.7	485.5	289	204.1													13.733	13.428	8.545	31.128	17.395	27.161	9.766	10.986
184	148.6	375.8	117.8	473.8	79.4	57.2	628.1	1015.6		85.2	375.3	195.5	690.7	242.1	2719.6	293.1	121.8	1104.1	2236.8	137.6	45.2	1601	1016.9	429	41.9	59.5	110.1	386.4	263													26.55	9.155	7.935	23.193	10.376	14.343	15.564	47.302
63.4	218.2	13.6	240.1	71.3	162.5	341.6	1682.1	93.6		287.5	14.7	757.7	1078.9	250.4	354.4	53.8	290.1	3058.2	251.2	69.9	807.7	141.2	121.3	557	128.1	994	16.9	239	320.4													14.648	17.09	12.207	11.597	17.09	16.785	11.902	8.545
98.7	171.6	284.8	37.1	271.6	182.4	129.1	263.9	340.8		188.7	840.7	150.5	590.5	951.1	844.4	59.3	197.5	5990	404.6	127.4	42.2	58.8	1042.1	161.5	589.1	204.6	477.6	659.4	45													9.766	42.419	13.123	22.888	7.019	14.648	8.85	8.24
72.9	357.8	54.3	174.2	149.1	34.8	271.8	1568.1	74.1		499.4	197.5	204.4	229.8	46.4	403	518.4	296.9	201	918.8	500	92	492.2	970.7	1814.3	431.2	1061.4	91.1	98.3	958.6													10.986	27.771	11.597	14.038	9.766	22.278	21.973	11.597
86.1	451	57.7	199.1	352.7	17.5	462.5	895.6	246		137.7	17.6	849.8	1145.5	181.3	1055.8	59.5	302.3	38.1	462.1	291.7	26.4	129.1	362.2	1244.1	69.8	1211.4	459.9	1272.3	342.9													9.766	8.85	36.011	8.24	6.714	13.733	16.479	8.545
23.9	146.5	182.5	88.9	195.7	145.6	420.3	834.4	46.5		1129.6	41.7	1684	363.7	20.8	176.8	822.9	660.9	660	1481.9	367.4	209.6	475.4	451.8	331	75.9	729.3	606.6	459.6	271.7													9.46	13.733	39.063	20.752	7.019	20.752	9.766	9.766
152.7	230.9	160.2	101.2	689.5	63.9	315.1	634.1	127.7		462.6	192.6	300.7	1860.3	26.4	256.9	297.4	120.2	21.3	422.8	236.1	57.2	310.3	1172.2	262.5	577.1	1048.8	324.3	1482.9	146.1													10.071	23.499	10.986	17.7	24.414	18.616	17.7	7.935
143.4	159.6	214.6	67.5	170.4	104.9	36.5	14.9	1091.1		64	695.1	48.6	905.3	1021	1243.9	66.6	36.7	128.1	134.9	40.5	83.7	234.8	756.2	359.5	101.7	69.9	61.2	176.7	255.6													18.616	12.207	11.292	20.142	7.019	19.226	8.85	16.479
68.4	934.3	382	60.6	150.1	57.8	796.4	396.8	112.3		162.1	693.4	723.6	122.3	460.4	18.6	515.6	239.1	300.6	64.7	34.2	72.7	561.7	186.1	333.4	464.7	730	676.2	1252.2	252.9													22.583	9.766	20.142	24.109	11.597	16.785	12.207	8.24
18.6	43.8	868	114.8	270.4	26	216.5	1154.9	124.8		757.2	152.1	1100.3	1209.8	459	3056.7	69.4	278.2	869	603.3	225.9	59.6	252.7	507.2	1887	216.8	1739.7	102.8	1760.6	227.6													12.817	16.174	18.005	23.804	12.512	16.785	30.823	11.292
72.4	17.7	60.3	80.7	472.9	150.3	99.4	131	11		25	1246.4	28.3	2049.4	265.6	888.6	670.3	652	743.2	1876.9	288.9	575.9	188.7	344.3	229.4	238.9	4493.2	30.8	949.7	842.9													12.817	17.395	14.954	13.428	14.648	28.687	13.428	15.564
95.6	1260.2	635	262.9	119.5	12.9	573.5	1431.6	47		188.8	239.6	337.5	214.5	96.4	3973.3	208.2	679.3	749	4257.1	803.7	38.8	126.5	94.7	499.7	314.9	2335.1	552.1	297.7	196.2													11.292	9.155	8.24	14.648	16.174	16.785	16.479	15.869
51.4	184	46.1	45.3	153.9	38	564.7	575.2	47.2		271.6	586.3	1540.6	179.9	1322.8	970.5	51.5	140.9	1664.7	5283.1	211.5	95.7	924.5	635.9	287	414.7	2249.9	176	183.3	149.8													10.071	7.019	17.7	20.447	14.648	19.226	31.433	11.902
144.2	162.7	59.6	235.7	266.4	37.9	58.6	15.7	338.8		49.1	221.8	1161.3	599.2	680.5	1849.8	26.9	219	7965.6	1064.3	98.1	23.5	801.8	25.3	1093.5	210.4	7203.1	854	311.5	165.6													12.207	11.902	30.518	16.479	18.616	27.161	20.142	8.545
56	416.8	515.4	28.7	356.8	149.4	1200.9	1505.3	875.9		98.9	70.3	816.7	418.1	496.6	5489.4	152.6	1001.2	254.4	3722.7	97.3	210.4	587.1	280.6	243.3	85.3	2697.8	31.6	1348.7	298.9													11.902	8.85	27.161	14.343	7.019	17.09	9.766	18.311
58.6	458.7	368.7	70.8	268.4	269.5	1176.3	136.6	168.5		704.5	346.4	351.1	23	88.4	2005.5	310.4	52.5	178.7	7786.8	763.5	45	652.4	731.8	1011.7	154	3780.1	1375.3	64.4	180.9													15.564	15.869	19.836	17.09	35.095	11.902	22.278	8.545
30.4	95.1	149.3	153.6	251.9	66.2	625	1520.1	58		87.9	644.5	1452.7	481.7	97.7	1764.8	576.8	371.6	4157.7	4269.4	69.1	104.4	2177.2	384.6	824.4	348	992	64.1	1024.4	351.1													10.376	10.376	12.512	18.616	16.479	16.479	12.512	10.986
9.4	380.7	138.5	147.5	30.8	34.9	140.7	3233.7	233.7		26.4	257.1	139.5	552.7	112	172	242.5	132.2	3683.9	1878.2	11.5	86.5	136.6	412.8	2369.1	358.4	194.1	1171.9	472.6	69.4													14.648	21.057	17.7	10.986	18.311	9.155	19.531	8.85
437.4	319.2	179.8	148.1	101.7	24.6	164.1	390.1	236.9		89.7	721.6	515.6	402.6	158.4	242.8	348	600	330.1	311.1	1324.3	44.1	301.2	1283	1643.8	312.5	182	815.5	1856.4	470.2													15.869	12.817	11.292	13.428	10.681	14.343	10.376	22.888
118.1	381.7	17.5	328.5	240	11.3	695.5	1154.9	592.9		112.6	264.6	282	605.7	110.3	853.1	547.5	67.5	612.3	12938.3	34.4	301	116.4	240	928.7	394.6	908.6	318	445.3	522.4													21.362	9.46	19.226	44.25	13.428	10.986	16.479	8.24
206.2	233.7	197.8	140.7	51	112.3	83.9	826.2	87.2		622.9	127.7	187.6	442.9	133.7	299.4	123.6	678.7	66.7	8504.9	551.6	160.1	1921	98.2	865.4	157.4	666.3	111.4	482.4	130.6													30.212	14.343	12.817	13.733	16.479	14.954	13.428	9.766
137	33.7	205.4	118.1	446.5	18.2	248.5	1419.5	90.8		475.2	34.1	293.8	686.7	20.3	317.1	1457.4	91.3	528.6	2173.5	405.8	271.6	59.7	197.9	764.9	169.6	51.2	535.7	867.1	129.6													15.259	23.804	9.766	11.597	7.629	26.245	39.368	10.071
88.2	182.3	202	155.9	436.7	47.8	769.9	210.2	304.5		1.3	314.6	321.4	93.5	181.6	5310.1	215.5	437	621.2	669.9	31.4	121.9	186.3	207.8	3538.9	341.3	404.8	84.8	16.5	373.9													15.869	12.207	7.324	7.629	17.09	28.076	23.193	15.564
219.3	359.9	25.8	985.8	73	14.9	715.1	2373.2	250.3		167.2	301.2	361.6	312.2	1936	5191.5	51	23.4	2333.8	2475	175.6	126.4	284.6	439.7	5471	24.9	1114.3	76.8	378.7	537.2													20.752	9.46	41.809	10.376	8.24	23.193	31.128	13.123
69.3	217.1	267.6	18.4	32.1	8	255.8	639	627.6		150.2	234.4	87.8	565.9	43.4	49.9	122.6	551	8530.7	2269.9	252.9	59.8	168.2	446.5	525.4	590.4	3195.3	302	121.8	117.4													13.123	16.479	8.24	13.733	7.324	23.804	8.85	8.85
10.1	873	322	98.4	273.8	167.9	67.3	213.2	141		126	26.7	1070.2	1177.5	171.8	2916.4	32.9	319.5	2029	2483.4	59.3	364.3	1261.5	739.6	3570.2	1952.1	140.1	245.2	1528.1	337.5													16.785	28.076	7.629	7.324	24.719	39.063	15.259	12.207
222	105.3	118.5	170.6	211.8	301.5	655.5	421.4	63.3		436.7	28.7	32	28.1	120.1	535.9	407.5	88.5	6401.4	3000.7	171.2	208.5	365.8	1089.5	139.8	285.9	150.5	760.9	138.7	76.6													14.648	10.986	18.921	23.804	21.057	36.316	31.738	16.174
32.8	423.3	99.1	66.8	113.3	49.8	579.3	343.3	587.4		67.8	151.3	958.2	396.7	697.3	2478	1037.7	45.3	2020.9	1578.2	595.2	48.8	350.4	144	796.3	25.2	92.7	482.6	58.3	270.6													9.766	12.817	14.954	29.907	8.545	32.959	12.207	8.24
40.6	325.4	74.8	86.9	110.9	20.1	549.5	1356.7	868.1		446.9	793.7	168.3	791.9	644.1	4236.5	23.2	162	2935.2	9593.4	577.2	50.6	1312.7	248.9	7838.3	539.9	2339.9	353.6	173.7	281.1													20.447	8.85	10.681	9.46	12.207	17.09	23.193	9.46
147.2	342.7	499.3	185.7	145.6	59.4	140	1824	1067.7		53.9	475.4	344.5	246.3	633.9	805.5	277.7	67.2	1407	1	304.3	211.2	169.8	2713.7	597	302.5	168.4	296.4	829.1	377.4													14.954	8.85	7.629	22.583	32.959	17.7	15.259	45.166
67.4	145.4	22.9	129	61.1	209.7	799.3	807.8	216.4		283.4	193.5	335.7	741.7	345.8	1168	2042.2	110.1	113.8	2140.8	331.8	55.8	151.6	521.5	355.4	322.6	1040.4	1089.9	1947.7	1520.8													14.343	18.005	10.071	9.155	8.545	20.142	34.18	8.24
30.7	73.3	16.3	177.3	759.1	25.8	1192.7	3777.6	594.2		422.4	79.7	573.9	1174.5	97.5	1188.2	1007.2	517.4	320.7	3340.3	1038.7	117.1	278.7	808.9	1300.1	1176	92	169.8	188.8	141.9													14.954	12.817	14.954	19.226	14.343	18.311	9.155	15.869
153.6	619.1	226.5	215.4	373.4	26.9	36.3	510.5	232.8		52.7	76.6	126.1	183.8	149.3	191.6	176.5	423.5	2315.3	3350.8	84.3	321	295	41.5	1196.4	281.9	15	55.7	227.4	1344.2													10.071	23.193	16.785	10.986	21.362	14.343	15.564	8.85
527.6	328.8	371.4	378.7	971.5	135.8	204.8	1357.2	591.8		183.5	78	483.9	860.4	382.4	950.5	355.9	458.4	1646.8	1974.5	84.2	39.5	1106.6	286.3	355.6	792.9	333.1	329.2	102.6	313.1													23.499	14.648	17.09	21.362	14.343	10.681	26.55	13.123
26.9	213.1	253.7	526	302.6	122.3	114.6	222.4	40.3		1114.7	46.9	1020	1349.7	62.3	960.6	608.6	313.4	7086	7174.1	59.7	356.3	334.5	78.3	1092.4	179.1	138.8	369.9	203	559.5													19.531	19.531	16.785	32.349	11.292	9.155	15.564	13.733
152.9	439.4	307	83.3	14.7	93.2	64.3	359.7	20.7		314.8	46	762.2	164.3	256.9	120.6	341.1	323.6	2323.8	3647	69.6	426.4	51.9	19.7	3001.8	102.1	342.2	467.6	1148.4	552.4													30.823	12.207	16.174	9.766	21.057	15.259	40.283	10.071
39.7	78.8	132.8	30.7	84.2	64.6	463.1	880.1	127.6		415.4	144.2	414.7	736	11.7	1454.4	177.8	422	1770.1	5124.2	405.4	20.9	85.2	419.7	741.2	677.5	144.6	164.3	472.9	1578.6													19.531	20.447	13.733	11.597	7.019	23.804	15.259	13.733
290.7	270.6	88.6	212.6	23.7	50.4	126.5	20.9	111.3		19.1	281	745.3	206.8	38.5	407.6	209.2	146.4	437	400.7	34.1	371	1171.2	98.5	577.3	629.6	875.8	775.2	972.8	99.2													24.719	10.986	21.057	10.071	19.226	18.921	9.155	13.733
131.5	129.5	113.1	51.7	32.5	24.5	346.9	580.4	578.8		237.1	129.4	69.4	254.3	1029.3	1144.9	728.7	408.2	285.9	7771.4	230.3	110.6	292	717.7	258.8	43.3	157	193.4	1102.9	925													30.518	16.479	10.681	18.311	14.038	19.226	29.297	23.804
62.4	384.7	90	46.5	60	171.7	660.9	715.4	49.1		85.6	904.3	170.6	107.4	337.5	1455	492	130.5	812.3	1756.6	248.1	373.3	553.4	1102.9	106.4	171.2	1173.4	671.1	393.3	772.4													21.057	27.466	7.935	11.292	20.752	10.071	9.46	13.123
68.8	298.1	87.3	381.1	348.4	11.2	433.5	2774.4	380.8		318.6	30.8	152.5	254.6	339.9	2072.2	274.2	138.1	2452.3	374.9	83.2	302.6	118.1	752.6	1683.3	348.2	633.8	386.9	550.6	81.6													12.817	19.836	26.55	11.902	15.259	13.123	17.09	16.174
33.8	1270.1	154.5	56.8	749.2	67.6	334.7	1244	904.3		30.8	318.1	1078	1287.6	278.7	37.1	448.8	113.3	462.5	7077.1	135.9	453.5	67.7	297.9	2940.3	221.9	1196.4	125.7	342.3	641.7													19.836	11.902	30.518	8.545	32.959	26.55	11.902	10.986
98.6	26.7	64.5	117.5	251.4	59.9	721	101.3	24.1		121.8	92.4	161.1	79.4	101.1	48.6	165	19.8	820.2	1954.1	541.9	166	564.5	711.2	290	463.3	204.9	378.7	562.2	306.5													19.836	8.545	9.155	11.902	9.155	11.292	11.902	10.071
17.3	153.7	321.3	98.2	568.7	36.7	452.6	1109.1	10		351.2	192.4	84.9	79.1	948.1	36.3	26.4	375.6	1458.8	2370.9	40.4	337.4	131	162	284.7	105.6	413	24	163.2	507.8													11.292	7.935	16.785	12.207	11.292	14.343	10.681	12.207
80.5	643.6	27.1	619.8	11.7	33.7	393.5	104.7	34.6		152.8	324.9	64.7	1249.8	531.6	200.5	179.5	1172.2	290.8	3826.7	616.9	106.9	255.7	413	3541.5	459.3	2080.2	17.9	193.8	114.9													10.071	11.597	7.629	13.428	9.155	13.428	14.648	38.452
95.8	446.6	130.2	71	214.1	69.3	296.1	2093.6	674.9		25.4	732.3	297.5	792.9	103	2186.9	38.1	60.4	572.6	2758.8	99.3	568.9	985.3	33	452.8	365.5	2152.7	248.2	329.5	324.3													20.142	20.447	12.512	18.921	14.038	10.376	10.681	10.376
377	53	71.4	69.7	481.2	83.8	800.8	353.9	63.9		130.7	305.7	43.1	454.4	1309.9	132.6	444.3	307.2	1279.4	2045.4	277.7	139.7	478.3	278.5	568.8	147.9	364.2	936.5	571.4	216.9													14.038	35.706	19.531	12.207	29.602	14.648	10.986	9.155
20.2	287.3	20.5	40.4	55.1	239.8	349.4	31.4	117		76.8	42.5	665.5	151.3	349	135.6	233	264.1	195.4	6649.9	164.8	115.4	1013.6	30.4	293.7	196	198.7	198.8	241.8	52.5													34.79	43.335	20.752	17.395	15.564	19.836	13.428	18.616
349.2	517.3	155.9	62.5	178.7	11.8	168.5	598.6	242.4		184	80.8	156.2	651.3	67.2	2139.5	300.2	105	3136.5	2360.2	82.6	815.8	1976.3	205	780.4	191.6	327.4	40.5	211.7	185.6													25.33	11.292	7.629	13.428	22.278	19.531	25.024	8.85
179.9	119.3	112.6	175.9	58.6	50.3	967.7	201.7	197.4		306.1	124.3	776.4	91.1	73.7	2573.5	192.3	530.6	197.9	426.5	530	83.2	917.1	661.8	463.7	98.3	1276.1	750.9	101.6	263													10.071	20.752	9.766	17.09	8.545	9.766	17.09	70.801
117.3	29.6	40.2	329.1	967	64.2	323.9	651.6	70.7		98.5	180.8	1147.9	960.8	137.5	153.7	586.8	141.1	7612.9	723.8	719.8	376.7	157.4	887.2	3161.2	633	312.1	544.5	882.7	763.7													13.123	8.85	8.24	37.842	7.935	11.292	12.512	9.766
27.5	166.7	51.9	75.6	418.9	162.7	13.6	840.2	157.7		231.1	104.2	67.3	317.1	200.4	1637.9	176	57.8	10484.8	317.1	14.2	212.7	2159.5	819.2	929.2	374.7	45.2	675.5	75.6	104.9													9.46	6.409	7.629	10.376	9.766	19.226	22.583	8.545
112.4	786.9	27.8	553.7	424.1	15.5	65.4	85.9	369.2		467.5	294.3	377.5	60.3	205.1	741.8	66.1	121.7	4430.5	629.3	148.2	32	511.5	146.3	148.5	174.3	418	821.7	425	173.6													18.616	12.512	14.954	21.057	10.986	37.231	9.46	9.155
504.3	43.7	16.1	99	401.6	48.1	41.2	2653.3	100.6		20	137	60.2	127.2	725.6	597.2	109.7	137.4	452.2	310	292.6	221	423.8	534.6	1496.7	407.3	33.3	216.2	287.1	100.4													14.954	12.207	15.259	21.057	10.376	12.817	11.292	12.207
91	101	132.7	243.2	195	11	56.4	977.1	153.7		1396.8	611	665.6	79.7	221.8	772.5	912.1	32.5	1029.9	3099.4	77.5	178.1	422.9	489.7	293.5	965.8	491.9	517.6	44	440.7													11.292	18.005	13.428	23.193	15.259	15.259	16.174	8.24
36.1	281	68.9	79	364.6	53.7	129.5	31.4	1259		13.2	21	316	47.2	261.3	2406	131.5	328.7	5828.9	960	51.3	136.6	202.9	604.2	661.1	455.6	876.3	72.1	155.6	929.3													12.207	12.207	11.292	10.681	10.071	20.447	20.752	9.155
223.9	99.9	53.6	37.5	86.2	157.7	151.9	847.9	14.4		1147.6	60.1	793.9	686.3	330.7	51.9	138.7	302	4147	366.8	181	124.5	380.4	46.9	532.5	12.2	562.5	161.6	1291.2	1007.1													18.005	9.766	8.545	41.199	8.85	9.155	12.512	39.673
79.9	137.6	237.9	744.9	176.2	157.9	69.4	474.1	46.8		296.7	350.5	2320.9	736.9	381.8	431.3	934.6	115.2	18.6	2618.6	386.8	302	207.5	149.9	3247.5	83.5	1805.3	26.8	1009.7	114.8													11.902	9.766	7.629	7.629	7.935	12.512	9.46	19.531
18.7	81.2	314.6	123.6	233.6	201.7	446.8	350.2	77.8		670.3	36.1	133.4	551.8	650.5	1309.7	148.6	324	1594.8	5140.5	310.8	53.3	143.1	507.7	126.7	438.4	223.6	577.9	805.6	327.1													12.207	21.057	13.733	10.376	8.545	12.512	16.479	7.935
60.3	407	74.8	38.4	200.1	22.8	742.9	533.5	207.1		181.8	409.8	185.5	48.4	478.7	413.2	1039.5	277.8	1026.8		87	528.6	27.7	68.4	1252.1	416	75	20.2	642.2	955.3													15.259	11.292	14.954	26.855	8.545	21.057	14.343	8.24
184.9	323.6	96.5	68.2	93	53.1	97.5	565.5	233.3		230.8	99.6	222.8	165.8	989.2	2518.4	632.5	753.7	92.8		868.3	136.3	714.8	452.1	1515.6	1379.4	305.3	347.5	85.2	1020.1													10.071	18.616	7.324	31.128	8.85	17.7	18.616	10.376
66.9	96	20.2	382.3	468.2	70.3	785.5	1052.2	396		417.1	528	30.1	2960.7	537.7	1307.5	78.4	644.4	1440.5		193.5	164.9	501.2	621.6	189.4	409.2	139.9	431.7	65.8	58.8													12.512	13.123	13.123	19.226	13.733	28.076	9.766	8.85
191.4	63.7	231.8	49.7	158.2	143.3	392.3	811.2	1216.2		86.3	253.5	311	890.9	282.7	3595.8	557.5	50.5	252.7		489.6	162.6	1010.4	686.6	571.7	633.7	41.3	571.1	133.4	348.6													12.207	23.193	33.569	19.226	17.09	35.095	20.142	8.24
58.7	206.5	568.9	229.6	44.6	199.1	680.4	934.4	419		120.8	608.8	653.2	1000.4	170.5	222.7	400.3	201.5	3452.9		168.1	341.4	171.6	1429.5	605.9	648.5	99.5	257.4	249.4	478.2													10.376	17.395	21.973	21.362	7.324	20.142	11.292	7.935
35.1	426.7	57.6	82.8	22.8	50.8	298.9	538.5	365.2		368.9	87.1	2267.7	941.5	210.4	596.6	128.5	242.8	297.4		385.7	130.7	866.4	74.4	2412.3	1034.1	491.2	144.2	1716.1	589.3													18.005	7.019	16.479	13.733	11.292	14.343	14.648	10.376
402.9	25.2	141.5	145.3	672.7	67	52.1	228.4	704.4		269	107.3	357.4	947	502.7	968.4	202.3	325.9	837.5		68.7	146.4	104.9	356.8	1707.5	141.4	1291.3	866.9	151.9	200.5													11.597	22.278	10.681	23.193	6.714	14.343	8.85	30.518
84	57.2	224.8	21.9	28.1	24.1	155.6	519.4	214.6		55.5	54.6	796.1	619.4	158.5	329.2	364.5	352.5	1932.6		495	513.1	199.3	40.4	84.2	109	1757.1	336.5	1016.2	116.3													15.259	10.681	18.311	7.935	9.46	24.719	22.583	16.785
47.3	715.9	242.1	130.6	35.4	23.9	431.3	1602.7	128.1		856.6	82	297.8	906.9	239.5	143.3	399.9	16.9	1092		293.4	225.7	211.9	524	571.2	31.3	109.8	555.5	589.3	557.4													19.531	13.733	8.85	7.935	13.428	15.869	18.616	12.817
350.3	43.4	139.9	68.6	33.9	61.3	642.1	504.9	330.8		72.7	110.2	78.8	500.7	398.1	1274.6	517.5	482.7	997.9		245.6	169.2	254.6	390.3	73.5	332.4	317.9	675.6	76.7	99													13.428	21.973	10.681	7.324	10.986	17.7	9.766	9.46
39.7	106.1	69.5	320.6	287.9	30.9	173.4	80	213.3		201.2	849.8	780.7	78	37.3	1140	122	195.3	12.4		90.7	63.3	581.7	297.6	1111.3	334.4	239.6	74.4	2736.7	344.8													9.766	6.409	26.55	19.531	8.545	14.038	9.46	17.7
89.3	84.8	173.9	314.5	553.9	111.5	231.7	1617.6	45.5		27.5	641	497.7	1002.6	418	149.9	194.4	137.9	266.9		318.8	713.5	120.8	687.2	1238.1	211.3	1010.4	62.2	242.8	46.8													21.973	15.259	25.024	11.902	6.714	18.005	17.7	15.259
58.8	448.8	174.3	17.2	256.3	25.5	170.9	940.9	193.3		535.2	216.6	1065.4	463.4	235.5	1010	122	70.4	1294.3		236.6	162.5	331.5	397.3	226.4	426.2	144.2	499.1	1538.6	198													9.766	20.142	44.556	31.128	17.395	21.667	14.343	9.46
61.2	107.5	98.6	464.9	325	93.6	44.5	536.5	62.5		253.9	190.4	1782.2	639.2	208.4	663.5	335.2	467.9	110.6		34.8	465.3	102.5	2057.8	589.1	241.1	176.5	405	265.5	215													10.376	26.55	9.155	30.823	7.629	12.207	25.94	13.733
20.6	130.5	131.5	95.5	103.5	139.5	549.9	1382	168.2		521	224.1	930	448.6	88.9	2288.3	257.7	1818	83.2		213.1	65.3	389.8	641.6	1411.7	1374.3	347.2	1118.5	1198.1	27.3													17.09	17.09	14.343	15.564	29.297	18.921	10.376	8.545
58.2	163.3	451.8	27.9	119.6	193.5	298.2	947.7	676.8		145.1	0.1	231.1	30.2	335.4	1987.1	781.7	68.9	286.7		327	449.4	383.9	441.1	2022.6	310	38.2	615.1	617.3	187													15.564	13.123	36.011	9.155	11.292	32.654	9.46	8.24
437.9	65.8	229.3	78.3	156.8	219.5	363.6	2340.3	54.5		403.9	178.3	198.5	315.3	365.4	1613.2	301.4	43.6	4343.5		648.2	325.6	170.5	179.5	271.5	597.9	929.7	606.6	176.6	246.6													22.583	18.311	12.512	11.292	20.142	11.597	13.428	13.428
119.9	386.6	259.2	179.9	532	45.2	554.8	135.5	100		444.5	130.1	516.9	224.3	528.3	916.5	298	788.9	1769.5		169.3	181.9	324.7	239.4	385.9	1329.1	184.8	286.1	1201.9	515.3													15.869	9.766	14.954	25.94	12.817	26.855	10.071	13.733
104.7	81.7	233.2	122.2	183.4	70.3	766.3	333.5	382.4		23.8	487.5	1276.1	611.1	343.2	1489.5	86.1	1417.4	5543.5		400.1	91.1	722	380.8	272	457.8	145.1	137.5	428.9	686.9													31.128	9.46	40.283	7.629	26.245	39.673	18.311	8.545
161.8	77	148	97.4	278.6	140.8	345.8	2259.3	96.3		187.8	28.5	629.7	460.2	650.2	125.6	320.8	161.8	199.1		832.4	461.6	762.8	17.9	212.8	1469.6	279.5	723.9	620	32.7													25.024	7.324	14.343	26.855	10.986	15.564	12.512	25.94
39.9	312.7	126	72.1	195.9	124	62	171.3	364.3		9.8	489.6	475.6	288.4	452	1631.2	21.2	559.4	388		162.1	356.3	372.5	73.4	3150	58.6	1366.3	119.3	653.6	829.8													15.259	10.986	13.123	7.629	17.7	16.785	22.888	20.142
440.5	398.3	57.7	29.2	321.6	87.4	191	1156	72.8		68.3	126.4	334.5	328.7	114.3	1062.5	747.6	442.3	152.1		216.2	229.9	260.8	53.4	441.3	327.6	618.9	266.1	393.9	1256.9													10.071	14.343	7.629	28.381	10.071	15.564	9.155	9.766
7.3	377.9	252.9	84.5	139.3	379.2	190	611.8	456.6		17.2	122.9	574.8	60.2	152.1	255.9	16.5	482.4	2415.3		128	265.5	72.2	600.3	590.1	205.4	418.1	616.4	262.2	280.1													21.362	22.583	15.564	46.082	12.817	9.46	16.174	20.752
85.9	456.4	17	328.1	33.1	89.9	219.8	1473.8	52.7		1268.2	37.3	692.8	483.8	26.2	1514.4	836.4	184.8	345.1		127.5	1340.5	156.4	963.8	1352.9	420.9	454.8	87.4	417	82.6													34.18	7.324	32.043	10.986	8.545	22.583	15.564	8.545
220.6	54.1	440	238.5	536.1	39.4	177.4	345.8	338.3		185	591.6	721.1	335.4	151.1	1900.3	728.4	80.4	3441.7		194.1	54.5	143.8	350.9	192.2	83.8	440.7	1215.3	1057.4	1598.9													9.766	8.545	9.46	23.499	18.005	24.109	10.071	19.226
235.3	53.7	455.1	171.8	256.4	246	353.3	463.5	928.7		450.5	422.1	2799.9	477.5	456.3	1686.6	140.5	486.8	548.7		100.9	271.6	545.1	16.1	338.9	901	211	189.3	1480.4	915.4													30.518	9.46	27.161	20.447	7.935	11.292	10.071	9.766
262.6	8.7	36.9	56.7	123.4	131.8	821.5	630.5	172.3		1677.5	274.1	116.9	392.7	177.8	503.9	182.8	364.5	141.5		75.4	484.1	1817.1	1247.4	851.6	904.6	673.1	362.6	541.1	2155.8													14.954	12.207	25.024	12.207	9.155	33.875	13.428	11.597
14.5	91.2	224	132.7	25.7	61.9	551.1	1355.4	143.6		44.7	128.6	433.2	1373.8	361.2	390.9	44.6	122.4	386.1		279.2	75.7	257.5	1672.6	1123.3	604.1	1176.9	206	94.5	214.9													10.071	17.09	25.94	13.428	29.297	31.433	9.155	14.648
75.7	80.9	16.6	7.3	314	26.9	36.4	1374.4	216.4		457.5	332.8	476.6	1141.8	22.1	409.2	148.8	357.4	8450.7		881.4	1430.6	164.4	1459.9	1959.5	46.3	2392.3	770.1	1111.3	120.2													17.7	32.043	18.616	9.46	24.719	23.499	10.376	9.46
98.9	48.9	114.6	198.4	216.5	33	151.4	1324.8	71.4		919.1	20.8	602.8	268.9	135.5	2273.6	274.5	165.4	1607.4		39	1371.4	66.9	85.9	1204.6	1007.5	143.6	140.8	307.7	403.3													13.123	10.681	10.376	10.986	8.24	27.466	18.921	10.376
118.5	326.3	64.3	148.5	101.9	100.7	207.5	545.1	767.9		390.4	143.9	442.6	113	297.7	1170.6	84.8	396.9	3340		65.4	484.3	500.7	41.4	2124.7	29.9	198.5	734.9	673.6	245.4													11.292	13.123	35.4	15.564	13.123	19.226	21.057	12.512
240.8	393.8	390.4	73.2	427.8	98	1540.6	1175.9	216.3		592	196.9	72.7	139.6	234.1	461	528.4	52.9	2071.6		76.5	594	197.7	586.1	87.1	261.5	86.2	136.7	339.8	289.1													21.667	21.362	14.343	66.834	8.24	14.954	30.823	9.766
438.6	326.7	69.9	82.3	122.2	217	235.8	762.1	720.8		484.1	909.5	477.4	256.3	251.9	107	68.5	305.7	787.4		210.2	324.1	20.4	123.4	588.1	1300.5	1560.6	103.1	707.2	587.1													27.466	17.395	13.123	25.024	31.128	9.46	8.85	39.063
64.1	671.8	53.3	45.2	312.8	31	165.7	166.5	186		148.7	54.9	38.3	367	24.4	244.3	31.5	808.8	2419.2		75.6	46.8	576.6	155.5	2574.2	55	64.5	958.2	816.6	232.8													21.057	7.324	22.583	7.629	19.531	16.785	9.155	12.817
248	207.6	326.1	44.9	319.3	30.4	92.6	434.5	91.6		447.2	1000.6	1038.4	333.6	596.6	1118	1026.1	165.9	936.2		35.7	188.9	213.4	974.6	288.1	13.5	1183.7	476.4	479.2	80.8													37.842	27.161	14.648	14.648	7.629	14.343	13.428	10.376
166.4	899.4	19.4	58.4	99.4	23.8	115.9	254.4	129.3		1110.5	76.4	62.3	758.1	71.1	1277.9	223.2	741.9	2212.8		47.9	57.2	711	121.7	1382.4	160.3	37.7	109.8	305.5	692.3													18.311	10.071	12.817	10.376	8.85	23.193	14.343	13.428
111.6	247.8	186.7	137.6	265.5	287.3	77.6	491	635.7		2354.2	176.9	566.3	866.3	498.5	179.7	571.8	155.1	6632.6		147.6	140.3	48	212.6	845.7	517.7	557.3	22.7	883.3	65.3													14.954	11.902	16.479	12.207	22.278	9.155	12.512	14.648
84.6	231.4	19.8	42.3	224.7	7.8	460.6	894.6	267.9		451.5	24.3	645	2709.6	717.1	3055.9	192.1	502.7	1590		397.5	74.9	156.9	1030.7	1647	35.1	1088	174.4	260.9	1172.4													11.902	22.583	20.752	14.648	42.419	15.564	19.226	24.719
61.4	205	98.1	228	148.4	11.6	46.8	952.9	6.2		3195.5	90	769	261	60.2	397.8	144.5	55.2	367.7		45.5	33.9	997.3	515.4	10214.6	313.8	657.7	50.9	294.9	121.5													18.005	10.071	15.259	15.259	7.019	15.259	10.681	9.766
92.4	216.6	135.4	161.9	158.2	31.2	1341.3	391	638.1		429.8	51.6	356.3	431.3	329.5	3037.1	150.3	93.6	2944.1		140.9	144.7	190.4	2029	3832	533.6	227.2	1690.2	239.1	1015.3													19.226	12.817	9.46	26.245	11.597	16.174	34.79	33.264
271.8	282.6	232.9	94.7	251.7	14.6	66.3	2548.6	87.5		829.1	951.8	586.7	872.8	45.2	2599.6	292	103.5	5122		240.4	61.7	797.2	1002.9	1255.8	2241.8	609.5	384	50.4	17.2													10.376	28.381	13.733	13.428	8.85	16.785	14.343	8.24
75.9	554.7	159.2	347.1	16	89.3	221.7	363	198.1		348.5	245.8	122.8	159.5	9	6581.3	589.1	71	2667.5		242.5	92.2	175.9	146.6	82.3	1590.6	21.6	188.5	74.9	32													11.292	7.935	70.19	14.954	6.714	14.038	13.428	20.752
458.6	194.6	111.1	79.5	191.6	62.2	268.1	3028.1	77		1407	451.1	876.5	423.7	25.6	978.6	263.8	55	5391.9		123.7	363.1	1143.3	30.8	333.2	574.8	30.1	390.9	1026.4	286.6													15.869	21.362	18.005	9.46	15.259	30.518	14.038	44.25
108	69.5	56.8	168	804.1	81.3	183.9	462.9	115.6		1003.5	1352.9	267	244.6	171.3	6919.2	712.8	347	5972.1		403.8	265.5	335.4	1105.2	1944.7	787.3	1235.6	317.7	951.1	289.8													10.071	10.071	18.616	12.817	11.597	45.776	21.057	10.681
151.2	55.8	419.6	176.9	628.5	244.6	179	491.6	455.3		901.8	451.1	908.6	355.4	579.7	2754	38.8	220.5	182.4		207.5	255.2	46.2	14.9	1957.9	289.5	2012.2	27.7	1398.1	333.4													20.142	13.733	14.038	11.902	21.057	16.785	16.785	52.795
340	29.9	46.4	233.1	79.5	39.6	875.6	1450.6	84.3		116.1	251.9	830	159	220.9	3136.9	92.9	152.7	3756.5		629.1	117.2	51.2	363.8	460.5	16	679.1	273.3	71.5	937.8													11.292	17.09	78.43	11.597	8.85	21.667	11.902	9.46
344.1	262.6	611	172	188.9	209	65.8	189.4	86.8		334.4	314.9	643	160.2	70.1	217.1	147.8	84.2	1289.5		183	49.7	715.7	533.5	1919.5	242.4	156.2	153	1030	19.5													11.292	11.597	33.875	16.479	10.071	36.621	14.038	18.311
37.3	168.8	402	56.2	644	137.4	448.8	453.8	377		190.8	298.8	1406.4	737.7	150.3	1775.9	409.3	678.1	79.2		127	331.1	129.7	1109.7	191.2	26.5	23.8	638.5	497.8	563.1													10.071	12.207	24.109	8.85	31.738	16.785	15.869	10.071
16.6	41.2	103.8	388.5	298.7	259.2	236.9	527.6	27.4		216.5	61.4	173.2	38.8	176.1	853	385.5	374.6	594.5		272.6	355.8	136.3	515.2	1578.3	596.8	27.3	117.9	72.2	121.2													11.292	10.071	13.428	15.869	19.531	15.869	14.343	9.766
117.1	511.5	215.5	488.9	123.5	61.7	146.6	407	94.2		29	52.6	377.5	514	9.2	309	406.8	45.6	1720.9		52.9	61.9	40.8	1440.3	1318.1	111.7	2322.5	679.1	373.7	555.3													9.766	15.259	25.33	11.902	32.654	35.4	10.376	15.869
72	350.1	31.4	34.3	349	100.9	231.4	330.2	53.3		929.3	392.5	90.6	163.7	202.3	1257.2	1168.7	192.8	901.8		376.3	380.6	288.3	480.3	2090.9	220.8	1892.7	164.8	137.8	323.1													22.888	7.935	21.057	15.869	9.155	16.785	10.681	13.123
19.3	70.6	674.4	175.3	653.8	73.6	254.3	47.9	741.2		549.8	616.2	1339.1	507.7	268.5	1075.4	1194	118	6277.5		247.4	768.6	872.7	255.1	796.2	387.4	1555.2	298.1	339.4	536.4													18.005	35.4	10.986	16.479	7.935	12.207	17.395	11.902
71.2	446.2	60.8	219.8	38	232.3	287	1924.1	166.7		132.4	97.4	408.3	226.5	34.6	2030.3	434.1	374.3	6694.1		507.3	265.5	286.5	731.2	618.1	1020.7	14.9	397.2	517	328													11.902	8.85	20.447	9.155	11.902	19.531	12.512	15.869
62.2	255.3	37.1	140.2	25.8	285.3	357.6	389.7	211.4		374.7	129	505.4	46.6	150.6	888.4	372.2	199.5	2494		71.6	586.3	565.5	1081.6	674.4	285.2	350.9	923.3	365.4	658.3													42.419	17.09	27.771	14.038	36.011	15.869	14.343	8.85
59.9	239.4	390.1	188.6	124.7	83.2	322.5	1362.4	119.2		203.7	223.8	210.9	162.8	525.1	342.8	31.5	276	4475.2		469.7	336.9	149.2	14.2	649.9	171.2	476.4	59.3	3444.9	86.2													17.395	7.019	33.264	29.602	8.24	12.817	8.85	13.123
109.8	34.6	47.1	31.5	319.9	27.7	269.2	822.7	423.1		677.7	151.5	283.8	110.1	394.4	1331.5	340.1	305.9	1278.5		41.4	560.6	442.5	795.9	740.5	126.3	114.6	467.5	463.8	236.6													16.785	9.766	21.362	18.616	15.259	14.648	16.174	14.343
75.4	14	129.1	232	67.2	47.8	286.2	720.3	395.8		257.7	157.7	146.9	352.2	279	3794.4	741.2	454	29.7		108	203.8	192.3	34.4	949.4	176	587.5	442.2	1095	95.3													20.447	14.954	13.733	8.85	7.629	9.766	10.681	13.123
29.8	259.7	104.1	54.1	88.3	157.6	94.5	61.4	305.2		922.1	539.2	1170.9	287.5	611.9	499.9	334.6	408.9	2981.3		40.9	82.1	151.3	364.7	150.9	59.2	2033.2	444.2	2763.6	234.4													28.992	8.545	24.109	13.123	10.071	23.193	18.005	33.264
198	42.3	47.1	59.3	100.5	40.3	22.5	605.3	517.6		961.2	430.8	537	740.5	197.3	1267.6	417.4	514.6	1418.6		169.2	1840.4	1048.1	69.3	4549.7	955.3	66.1	711.2	365.3	562.7													10.071	18.311	10.376	16.479	11.292	14.648	8.85	22.278
479.1	152.1	57	26.3	26.5	250.7	102	416.3	527.4		441.2	118.8	1542	855.2	61.9	464.7	98.3	38.9	124.4		226.8	63.5	172.1	514.3	2413.2	389.6	431.6	307.5	177.6	502.9													16.479	12.512	17.395	14.954	37.842	19.226	12.817	8.85
243.9	221.4	572	188.1	237.3	163.9	132.9	30	372.5		743	555.8	126.3	748.1	933	7915.8	719.6	48.9	645.3		489.7	681.2	63	125.8	7126.8	201.8	805.6	522	705	18.1													21.667	11.292	12.512	62.866	8.24	17.395	9.766	8.24
68.9	56.7	565.3	527.1	597	225.9	206	29.1	250.5		829.3	186	226	31.6	240.8	6368.8	984.3	80.5	5020.3		175.4	109.4	427.5	814.6	495	79	119.1	795.2	801.7	343.3													11.902	14.343	18.005	20.142	9.155	32.349	14.038	22.583
140.8	204.2	403.2	48.9	30.3	160.7	103.5	399.9	351.6		183.6	154.8	494.1	600.1	68.3	953.3	2637.2	330.3	101.6		290.2	122.9	365	583.5	54.6	284.2	811.2	1053	348	171.7													21.667	9.155	7.629	10.071	10.376	9.766	11.597	24.414
251	12.8	290.5	57.7	49.6	83.7	323.3	187.2	194.3		335.8	240.4	301.7	322.3	86	3313.6	239.8	211.6			428.5	970.2	810.7	416.3	4340.5	13.5	1980.6	77.1	731.3	432.9													9.766	14.648	8.85	36.621	11.597	21.057	29.907	11.902
37.5	217.3	30.5	357.2	477.8	74.8	41.4	714.5	813.7		821.3	289.9	283.6	67.5	184.3	1453.3	732.4	1204.3			93.2	394.5	148.6	55.1	828.1	388.2	179.5	421.2	448.6	783.6													28.076	26.855	17.09	14.038	10.071	13.733	15.564	8.24
140.8	48.4	89.1	177.6	145.2	78.5	624.9	1414.4	194.3		469.2	107.3	324.9	365.1	16.4	860.3	420.5	80.1			97	155.6	117.6	146.4	3126.5	1222.9	222.5	99	919.3	376.1													29.907	6.409	16.174	8.85	21.973	23.499	9.155	30.212
32	216.5	66.5	540.8	194.7	100.3	177.5	1185.6	1076.5		486.2	829.2	173.8	167.5	885.8	4240.9	746.1	19			243.6	374.7	127	1582.8	753.7	179.8	538.5	51	957.2	469.1													29.907	21.667	9.766	32.043	14.648	14.343	11.292	9.766
121.1	763.5	241.1	166.3	396	70.4	88.1	230.3	468.1		322.3	55.5	172	382.8	199.3	2798.8	126.4	134.1			104.3	128.6	30.8	133.1	134.6	934.8	73.6	411.9	44	841.7													23.193	11.902	20.447	10.071	10.376	13.123	10.376	53.711
363	299.6	1046.5	89	132.3	79.4	262.3	311.1	168.6		446.5	210.3	321.8	29.8	346.7	4428.7	863.8	145.8			99.3	157.3	248.1	15.2	3514.4	391.4	923.8	277.4	383.7	253.2													21.362	18.921	18.616	24.414	12.817	14.343	24.109	9.155
209.3	247.3	260.6	135.2	357	165.4	262.2	140.1	31.3		238.7	37.8	57.4	12.3	17.9	314.2	147.1	159.1			109.3	120	510.7	213.1	466.3	548.5	775.3	58.2	212.5	521.1													9.46	9.155	21.057	28.992	8.85	15.564	10.681	42.419
96.9	220.8	103.4	115.4	250.7	90.8	208.9	1267.7	117.3		273.6	130.7	65.1	333.3	157.9	3044	225.6	19.8			57	282.1	126.2	984.7	1052.8	77.7	687.2	652.8	94.5	972													20.447	9.46	17.395	25.635	15.259	32.349	11.292	10.071
153.2	215.9	163.5	290.4	378	135.9	114.2	184.5	101.8		16.8	170.8	343.8	982.7	785.1	764.5	128.1	318			82	257.8	562.6	208.6	1949.2	323.3	2265.8	203.3	343.6	293.8													10.681	10.071	33.264	12.207	8.545	19.531	12.207	10.376
126.8	71.5	95.4	216.3	11.9	45.7	282.4	2541.7	17.3		365.2	1079.2	360.4	619.4	422.7	2732.6	153.2	306.5			642.4	76.7	315.8	1182.5	2130.9	97	198.2	125.8	800.9	262.8													23.804	21.057	10.986	21.667	8.24	13.123	14.954	7.935
26	314.8	115.7	149.4	121	8.7	175.2	530.5	204.2		142.7	605.1	1026.9	159.3	367.9	1847.5	32.8	43.5			69.9	220.1	443	392.5	1419	177.2	22.3	513.5	1852.6	192.8													17.395	11.902	11.597	18.921	10.376	24.414	9.46	9.155
112.7	69.4	138	118.1	161.3	74.8	501.9	203.8	92		154.9	22.6	283.5	1222	525.5	2354.6	158.8	362.1			55.5	123.7	50.8	363.8	279.1	320.1	1618.1	692.5	249.3	249.1													15.259	29.907	16.174	18.616	26.55	19.531	24.719	9.766
105.8	551.9	85.7	81.4	192.8	50.7	1439.2	52.2	529.1		27.2	186.3	1081.5	670.1	145.2	3255.3	433.2	240.8			925.6	456.3	95.4	502.9	55.7	380.6	3424.1	245.5	224.4	348													15.869	8.545	26.855	13.123	10.986	28.992	10.376	16.785
10.7	153.1	348.5	15.1	380.9	119.4	534.7	944.6	330.3		187.3	324.9	1481.1	335.4	588.7	464.6	118.1	41.1			382.7	167.3	396.4	185.5	3820.9	460.8	637.9	25.7	507.3	101.9													21.667	6.409	13.428	53.406	11.902	9.155	20.752	30.212
29.8	214.7	132.6	596.5	379.9	77.1	870.3	266	306.3		622.3	97.5	1499.8	180.2	132.2	3744.3	144.9	175.2			107.7	238.8	765.3	22.9		300.1	455.3	667.3	330.6	72.4													20.447	11.902	28.687	15.259	20.447	18.005	12.817	9.766
95.9	197.7	335.9	80.3	85.8	10	179.9	98.3	355.8		188.6	305.1	474.5	384.2	703.2	6294.6	281.5	95			533.2	31.9	694.8	1553.9		90	799.3	319.8	339.1	313													13.428	15.259	23.499	14.343	7.324	20.142	21.973	8.24
206	57.1	563	21	72.2	38.2	94.6	643.4	615.3		754.5	610.2	141.7	276.4	380.7	4744.3	52.3	250.6			96.8	338.6	769.5	107.3		96.3	455.3	117.5	891.3	536.3													16.479	18.005	10.376	19.836	12.817	9.155	10.071	80.261
206.1	333.2	255.4	77.8	119	10.4	686.7	756.7	895.2		136.4	607.4	373.7	679.7	79.5	1591.7	72.6	942.2			271	72.5	118.3	1115		334.9	633.3	225.2	929.6	184.6													10.986	14.648	14.343	10.071	16.479	31.738	10.376	13.123
147.8	312.9	765.1	445.5	877.7	101.3	10.2	525.5	446		23.8	385.9	47.9	573.5	198.8	8577.8	195.3	81.2			57.2	90.1	890.4	47.2		419.8	969	226.4	66.9	321.6													14.954	25.94	22.278	9.46	17.7	13.733	10.376	12.512
201.1	163.8	354.2	193.7	367.6	12.4	431.4	128.8	323.8		36.7	140.4	236.3	47.9	221.8	364.1	165.5	1688.2			187.5	212.4	46.9	453.3		239.2	516.4	253.4	1023.8	102.6													10.376	8.85	9.155	8.545	7.629	11.902	9.46	9.766
104.6	43.6	158	54.6	256.7	18.3	541.9	155.9	355		300.5	913.2	157.6	409.9	85.1	884.7	120.7	205.6			81.2	245.1	946.1	429.1		366.7	664.1	276.5	771.5	1117.7													17.7	11.902	16.479	16.174	11.292	13.733	13.733	11.597
163.2	106.5	110.8	69.6	44.5	138.1	5.7	925.9	395.9		1415.5	42.4	445.8	911.5	322.1	5957.8	32.2	95.3			261	1944.4	568.9	466		298.1	2862.1	80.8	314.7	1270.7													12.512	12.207	14.648	15.259	10.681	11.902	25.635	10.376
13.9	89.3	251.1	36	350.5	46.9	342.4	255.3	853.4		319.2	112	2157.8	46.8	281.6	7158.2	34.6	139.6			280.8	667.5	309	141.4		162.2	93.3	359.5	662.2	330.8													24.109	11.597	20.142	9.46	14.038	10.986	9.766	13.428
584.2	391.7	84.3	218	210.1	242.6	564	66.5	128.2		497.8	26.8	222.5	603.9	549.1	1107.8	366	332.7			87	908.7	510.2	69.8		121.3	279.6	304.4	81.9	964.8													12.512	7.019	24.719	26.245	13.428	17.395	9.766	10.071
9	125.3	137.2	148.4	339.5	99	202.3	14.7	181.9		435.8	38.4	48.7	387.6	16.1	307.2	365.1	515.4			777.6	142.6	1215.5	307.9		1011.5	417.5	878.9	299.7	398.7													13.123	6.409	12.817	32.654	13.123	16.785	12.207	8.85
37.9	81.1	268.1	160.7	42	160.5	1289.3	412	1504.7		690.4	311.2	159.9	244.3	550.4	67.2	354.6	318.2			32.7	90.9	149.9	1032.1		414.3	222.3	88.4	1321.5	25.4													12.512	14.954	12.207	14.954	30.518	29.297	10.681	77.82
32.9	8.1	210.8	226.7	645.9	115.4	29.8	1555.6	161.2		242.4	23.8	30.4	696	592.4	2086.1	868	41.6			355.9	95.7	372.9	603		1144.4	1918.3	378.5	42.7	63.9													15.869	10.376	13.428	14.343	8.85	10.681	13.733	10.376
14.9	338.4	31.8	81.5	143	68.5	955.5	490.2	139.2		115.3	33	1513.9	145.9	438.7	300.8	378.7	18			75.2	304.5	43.1	718		996.3	419.6	41	114.9	18.2													9.766	9.766	17.7	33.569	6.714	13.428	32.349	11.597
18.7	407.1	24.6	32.9	130.5	387.5	12.7	270.3	1190.9		540	482.6	954.2	110.5	34.3	1817.1	724.8	332			100.8	792.7	202.8	379.5		359.6	312.2	129	255.9	1165.8													14.648	19.531	8.24	16.479	14.038	21.667	32.959	9.46
30.6	443.5	188.3	91.6	269.9	158.5	79.2	94.6	74.1		413.1	134.7	1346	101.1	621.9	1097	814.9	258.9			82.6	548.2	549.5	196.8		136.9	858.8	325.6	405.1	381.4													14.954	8.24	7.629	20.447	29.297	18.005	11.292	18.005
20	380.3	192.8	13.1	521.5	20	649.4	655.6	569.8		127.8	103.8	54.2	564.6	434.2	560.4	95.4	492.3			301.5	557.2	61.3	532.7		54.8	3891	560	640.4	97.5													10.986	9.155	14.648	47.607	14.038	14.648	17.7	13.428
78.4	18.9	269.2	246.1	292.8	235.6	921.6	625.4	263.9		970.7	302.5	348.5	551.9	166.3	2415.1	447.7	1237.4			115.9	96.1	45	781.2		400.7	473.6	283.6	1233	137.4													18.005	14.954	9.46	7.324	6.714	20.447	8.85	15.869
10.4	365.7	170.4	98.2	77	385	119.1	1543.7	67.8		26.3	63.7	52.3	156.4	135.6		46.5	39.3			551.2	152.9	73.9	450.9		47.1	3837.5	441.7	1161.8	323.9													18.616	18.616	18.616	18.311	14.343	24.414	71.411	32.043
155.3	195.5	155	135	56.1	218.5	81	195.8	328.3		49.4	58.6	1481.5	573.1	496.5		72.8	21.2			164.2	361.2	405.3	615.2		351	1043.9	98.4	532	813.6													38.757	19.226	8.85	45.166	7.324	18.005	24.109	12.207
305.3	29.3	531.8	0.2	75.3	242.4	380.4	1892.8	235.5		92.9	299.3	1065	1967.8	371.7		1060.3	103			154.1	256.7	57.6	1275.6		159.6	1057.4	561.9	106.6	128.4													41.504	34.18	31.738	45.776	10.986	19.531	10.071	8.545
44.3	344.2	584.6	20.6	295.8	40.6	282.3	1313.6	453.4		107.4	488.8	357.9	857.1	473.5		754.8	213.7			137.9	1343.6	120.2	279		36.3	258.1	1375.4	198.8	265.3													15.564	6.409	12.817	20.752	9.766	13.733	9.46	12.817
61.3	403	303	253.7	257.4	27.4	279.3	653.3	924.3		308.1	208.4	1173	252.3	55.7		186.3	888.6			649.9	37	334.7	720.1		127.7	90.7	42	130.2	227.8													10.071	16.479	23.193	15.564	7.629	17.395	13.123	18.616
47	59.3	311.7	172.9	26	95.7	159.7	1178.1	136.7		1004.4	55.8	449.1	262.3	216.5		763.4	608.9			119.9	106.2	315.4	209.8		693.5	1027.5	96.9	377.2	572.8													15.869	14.038	12.207	7.935	6.714	13.733	17.7	12.817
43.6	39.3	113.8	27.1	294.6	75.2	93.2	3172.8	243		57.1	553.4	366.7	1033.7	673.1		229.5	47.8			47.3	506	220.7	180.9		213.9	156	39.5	83.5	53.7													12.512	6.409	27.466	19.226	22.583	12.817	9.766	8.85
126.7	354.9	116.2	194.1	425.9	53.4	65.3	1211.3	67		203.1	35.6	327.2	41.5	158.9		32	351.6			115.9	76.1	504	145		241.3	41.2	1117.4	955.6	51.4													12.207	7.935	14.954	27.466	18.921	27.771	9.766	14.648
170.5	34.9	151.3	103.1	254	41.9	226.7	221.8	334.4		39.7	151.8	1546.6	484.4	469.4		333.2	65.6			81.7	123.7	26.2	151.7		119.7	829.6	50.7	3515.7	734													11.292	21.057	13.428	21.057	7.935	10.681	8.85	21.973
87.7	101.4	227.9	10.7	468.5	222	330.3	3312.4	21.5		891.8	182.4	432.2	488.9	364.1		178.1	461.1			113.1	633.5	584.9	899.7		663.1	24.8	292.8	28.7	22.7													14.648	10.986	9.46	25.635	9.46	15.869	10.986	25.33
37.1	53	276.5	117.8	313.9	91.4	151.2	2155.4	40.3		45.9	172.9	195.7	494.9	727.1		727	67.9			66.2	309	393.3	48.9		271.8	1242.8	15.7	922.8	27.1													21.973	22.583	10.376	7.324	12.512	32.349	24.719	14.954
53	29.2	56.4	49.4	355	57.3	368	733.5	106.2		1286.5	263.6	184.4	571.2	519.4		790.2	81.1			194.3	83.8	519.6	131.4		237.7	3642.6	174.8	101.6	763.8													21.667	20.752	18.311	18.616	7.324	14.343	20.447	24.109
65.1	236	349.7	37.9	265.2	119.8	25.3	621.7	36.4		15.8	207.4	37.1	297.7	123.4		902	442.2			140.4	829.4	408.9	569.2		455.7	3474.8	61.3	497.7	618.9													9.46	7.935	33.569	21.362	26.245	32.959	9.46	14.648
113.6	585.7	75.2	45.9	40.9	15.2	785.3	226.8	158.5		285	498.5	135.1	131	47		586.7	370.3			206.5	65.2	287.3	564.5		492.4	12944.9	87.7	1242.2	1865.7													11.902	18.005	13.123	25.94	8.85	28.992	9.46	10.986
52.6	65.5	14	18.7	84.3	98.1	1489.8	51.7	183.3		43.8	235.2	573	1168.6	277.5		829.9	840.8			445.2	644.2	240	222		379.8	191.1	515.7	493.5	435.7													21.973	16.479	17.7	19.836	11.902	12.207	12.512	8.545
39.2	15.2	200.5	98.5	130	138.9	583.3	631.5	34.2		644.4	824.5	118	679	130.5		742.4	499.7			99.8	356.5	707.3	258.2		564.2	295.4	69.1	359.7	598.6													16.174	26.55	19.836	9.766	17.395	31.433	25.94	34.18
40.2	241.5	41.9	102.5	479.3	276	268.2	179.7	31		311.7	294.4	993.9	261.1	110.4		79.8	179.5			59.1	31.6	256.9	353.2		643.3	3083.4	50.7	275.2	94.9													13.733	10.986	8.85	19.531	19.836	16.174	9.766	11.292
74.2	109.5	87.6	179.6	81.2	147.4	318.5	21.6	149.1		332.5	123	282.5	68.3	260.9		166.7	179.6			107.2	200.7	136.9	828.6		66.1	732.6	17	545.8	223.9													10.986	7.324	17.09	9.766	14.038	31.433	12.512	24.109
46.4	9.9	473.7	140.4	38.9	40.5	93	39.9	0.1		719.5	191.3	143	567	765.8		1111.9	325.7			450.8	368.8	923	507.2		130.8	592.4	330.9	1600.4	943.2													16.174	8.85	7.324	8.24	8.24	19.531	14.648	14.343
146.3	29.6	169.1	239.2	146.3	101.1	842	300.5	41		80.1	74.8	187.1	195.8	109.1		1206.9	219.5			226.9	50.8	22.4	258.1		572.9	2932.6	84.8	375.7	413.3													10.071	13.428	11.902	24.109	10.071	14.343	17.395	7.935
111.6	104.4	33.5	114.7	261.7	432.9	1113.7	756.1	333.6		33.1	194.6	237.2	640.1	108.4		177.5	353.6			343.1	82.9	138.1	781.2		772.6	149.1	55.4	1281.1	136.6													18.005	9.766	10.986	13.428	14.648	9.766	23.804	10.071
40.1	634	185.4	73.7	70.3	49.1	295.9	624.2	10.6		428.8	60.3	154.2	227.4	32		263.1	127.9			238.1	151.4	83.9	124.3		150.5	1258.1	160	917.6	252.8													10.071	16.785	43.945	14.343	11.902	10.986	20.142	8.24
68.6	173.9	469.9	302.2	77.8	18.6	264	1019.7	82.1		38.8	386.5	1218.7	24	240.4		180.9	69.8			623.8	58.1	150.6	115.5		122.9	3673.7	38.9	1199.7	118													18.921	17.395	9.155	37.231	12.512	20.142	12.207	8.85
78.2	44.3	844	104.5	662.1	11.2	924.7	478.7	24.5		105.2	256.9	35	2968.4	166.7		447.1	72.3			257.9	114.1	588.1	401		61.4	179.7	188.4	1746.3	597													10.071	9.766	7.629	13.733	14.648	29.907	10.986	16.785
58.3	368.2	180.9	34.8	247.6	155.9	46.7	695.9	24.4		187.1	79.2	58.8	98.4	123.2		63.9	47.3			246.8	501.3	517.1	219.4		391.7	1195.9	28.2	769.1	649.1													18.311	7.019	28.381	18.311	7.629	26.245	12.207	9.766
17.3	138.5	219.1	46.9	253.3	27.6	97.2	373.1	871.8		248	20.3	339.7	69.9	78		99.6	124.5			167.2	692.8	494.2	376.8		153.9	673.4	148.8	1014.4	599.4													29.297	16.785	22.278	15.869	7.324	19.836	9.46	10.071
46.9	50.4	58.5	117.1	27.4	114.1	85	3394.2	289.8		377.2	746.7	285.7	132.4	34.3		369.7	366.5			112.8	383.3	1370.4	782.4		305.2	856.6	232.3	407	83.2													12.817	15.564	26.855	33.264	10.681	17.395	14.343	14.038
38.9	131.7	118.8	42.9	737.5	101.1	497.4	67.9	58.3		794.9	339.4	145.9	1317.1	343		761.9	258.2			62.8	101.9	53.1	470.8		48.8	478.2	205.2	915	131.2													46.387	8.85	44.861	17.7	9.46	13.428	23.499	13.123
14.8	40	174.1	143.4	126.6	21.8	1581.7	356.5	26.2		519.7	114.8	141.6	58.1	497.3		242.8	718.8			388	285	209.1	239.6		441.7	71.2	721.5	297.3	51.6													14.648	16.785	32.349	11.902	17.395	14.038	11.292	8.545
107.2	47	296.6	339.3	14.5	17.3	101.9	648.8	192.8		12.2	552.1	141.4	1533.4	17.8		988.6	449.4			694	157.1	757.8	181.9		20	853.5	334.7	446.5	306.5													11.902	9.46	16.785	17.395	10.376	9.155	38.452	44.25
27.7	104	13.9	447	110.5	54.4	389.1	1455.5	27		74	85.3	373.8	632.7	229.7		611.3	227.9			315.7	36.7	807.3	234.3		57.6	3115.9	83.2	819.1	465.7													18.616	12.817	11.292	24.414	8.85	26.245	22.583	7.935
234.9	519.8	240.1	46.7	315.6	92.1	356.2	159.2	164.9		30.2	124.2	1353.6	1213.6	479.3		66.2	49.8			55.2	239.4	120.4	257.7		62.6	299.2	338	43.3	704													23.193	21.057	12.817	8.24	7.935	13.123	14.648	8.24
134	168.8	132.1	156.6	22	101.7	140.2	269.9	237		384.7	268.3	639	138.8	319.2		2531.9	213.7			181.9	1129	600.4	451.4		388.9	1005.5	605.6	16.7	126.9													20.142	8.545	36.926	11.292	25.635	21.362	14.343	15.869
71.9	180	31.4	137.7	23.9	41.9	942.3	216.9	39.1		235.5	1240	216.9	317.9	189.6		1091	864.4			80	310.4	28.8	70.4		211.2	832.4	123.3	767.1	1068.4													21.362	9.766	93.689	20.447	35.4	12.512	11.902	54.932
765	494.9	171.6	22.2	196.1	14.9	187.3	396	660.4		209.8	435.7	474.3	1017.7	267.3		739.2	1437.7			81.1	262.7	125.7	750.6		103.4	20.6	448.3	196	16													11.292	22.888	9.46	10.986	7.935	18.005	14.954	9.155
39	412.9	300.3	546.7	704.1	44.2	28.7	1647.1	523.5		193.9	578.6	993.3	1213.4	383.6		2114.2	20.9			355.5	72.5	183.8	587.9		64.8	200.2	271.3	187.1	665.7													10.071	17.7	8.545	13.733	7.324	26.855	10.071	8.545
42.3	306.4	216.1	70.8	431.8	57.1	642.4	605	373.8		290.9	342.8	618.1	272.6	204.6		97.4	11.9			855.6	130.1	902.5	245.5		84.1	70.4	674.9	122.5	476.4													16.785	10.376	28.076	16.174	9.155	13.428	16.479	7.935
46.7	234	208	154.4	126.7	182.1	464.5	217.3	72.4		191.5	495.3	199.2	232.9	55.5		228.9	114.6			1101.8	299.9	541	662.8		761	914.5	641.4	579.8	65.9													25.94	9.766	65.918	11.292	21.667	31.738	18.921	13.428
109.6	32.3	89.4	182.2	214.3	19.5	1638.8	235.3	117.1		319.4	388.1	173.2	1512.6	1032.4		434.6	32.1			379.9	427.6	848.7	326.1		127.1	1503.4	195.6	66.1	348.9													15.259	14.954	13.123	21.973	33.569	17.395	11.902	9.766
23	30.6	283.5	143.8	195.9	113.3	470.7	295	176.2		30.1	168.1	557	202	583		957.9	158.9			322.9	97.4	101.5	141.3		106.1	967.5	533.8	835.4	31.9													14.648	23.193	16.785	28.076	11.597	32.349	10.071	11.597
48.5	50.8	22	61.3	233.4	35.2	660.4	1554.4	691.9		102.4	52.4	790.4	468.4	226.7		992.4	736.3			313.3	35.7	105	244.6		252	711.2	263.5	576.2	50.1													11.597	9.155	10.681	31.128	9.155	14.343	12.512	9.46
134.8	32.3	139.1	93.2	206.8	24.9	854.2	1297.8	35.1		251.1	227.2	233.2	96.8	1003.1		423.4	23.6			312.8	21.3	240.2	204.3		535.1	360.3	687.6	116.6	46.8													11.292	11.597	12.207	15.259	9.46	18.616	10.986	60.12
136.5	69.6	54.5	121.5	86.1	28.2	820.5	617.1	17.7		223.3	95	192.5	582	468.1		1503.3	43.4			266.5	198	179.5	497.9		651	1074.9	534.3	0	94.8													10.071	14.343	24.109	12.512	8.85	10.071	27.161	8.24
81.2	71.2	692.5	513.7	1283.1	30.2	949.9	28.8	331.1		740.3	746.4	164.6	1269.4	109.1		1254.2	124.3			643.1	209.5	124.8	201.7		88.9	751.6	246.7	256.9	768													26.245	14.954	8.85	21.973	10.681	13.123	9.155	14.648
163.3	116	34.5	26.5	286.5	103.2	340.8	1318.3	171.9		448.4	508.6	183.5	140.7	139.4		155.5	17.1			91.3	216.7	462.1	562.1		396	1012.7	24.8	0	61.5													17.09	18.311	14.038	14.343	11.292	22.888	19.531	14.343
112.1	414.5	236	50.1	504.5	24.7	39.8	514.7	148.2		376.9	225	545.7	88.5	339.8		195.9	279.6			623	326.2	122.1	707.6		740.7	324.5	301	198.7	284.2													14.038	30.518	10.986	7.935	16.174	10.071	10.376	14.343
64.3	99.4	143.9	223.9	180.3	271.6	616.8	419.7	223.9		738.2	116.5	753.7	275	655.3		1016.3	210.5			225.6	82.8	407	89.5		174.3	510.1	202.1	0	281.7													13.428	18.921	22.583	10.681	15.564	17.09	15.564	10.071
63.1	9.7	121.7	41	157.1	150.5	230.7	225.4	37.6		49.1	270.8	154	864.1	314.2		312.4	63.6			456.4	225.3	737.3	234		372.5	4123.9	131.4	841.8	228.7													10.376	9.766	12.207	10.376	8.85	12.207	19.226	8.85
13.6	15.9	239.8	48.1	68.2	19.1	22.2	361.2	215.3		61.8	505.2	299.7	650.1	32.6		40.7	556.9			471.1	362.7	189.2	465.2		69	388.5	358.3	347.4	425.8													10.071	6.409	12.207	10.986	21.667	33.264	10.681	10.376
346.4	62.4	77.5	642.5	2310.9	142.8	287	1406.4	83.3		1149.2	570	1129.2	170.3	75.7		983.8	622.4			244.8	20.1	354.9	37.9		797.8	2058.5	79.2	86.5	495.3													13.733	13.123	23.804	9.766	7.935	10.376	15.564	18.616
176	303.8	44	42.3	224.4	215.4	207.5	108.5	193.5		39.3	716.7	334.1	2279.5	316.2		203.6	165			401.5	330.3	918.7	528.6		51.2	176.8	163.4	139.8	103.5													16.174	7.935	23.499	14.954	35.095	45.471	13.428	12.512
317.5	717.9	38.9	52.4	170.6	113.8	19.7	290.5	1087.8		368.4	389	162.4	16.8	161.2		696	51.3			115.3	62.9	255.1	115.6		242.1	2664	193.1	127.1	708.3													10.071	18.311	21.973	9.766	15.259	21.362	13.123	21.973
130.4	42.1	20.2	119.3	151.4	101.7	415.6	645.1	140.9		162.8	397.3	408.7	323.7	1117.8		1465.7	149.4			49.4	307.9	335	450.4		42.6	333	336.9	611.1	18.8													11.902	24.719	8.85	10.071	91.858	53.101	27.771	36.926
32.6	133.6	39.2	59.5	85.5	124.5	137.2	1686	522.6		194.8	54.1	393	437.1	313.9		418.4	329.4			71	30.6	416.5	267.7		82.1	397.6	186.1	361.5	75.3													18.005	6.714	19.531	10.071	7.324	23.499	18.311	10.376
29.8	339.3	185.5	661.4	306.7	107.5	552	932.6	132.2		963	289.5	277.6	948.9	518.4		51.7	76.8			99.2	471.3	263.2	150.2		276.1	867.1	14.2	346.6	63.7													19.226	13.733	11.292	14.343	33.264	17.7	27.466	11.292
206.9	172.5	161.9	25.3	84.4	121.6	136.9	737.2	761.7		373.7	48.1	528.1	1062.6	68.4		2049.4	201.6			235.3	244	131	204.6		54.2	2645.9	618.8	20.9	105.2													29.907	10.376	24.414	9.766	18.921	12.817	10.986	7.935
89.3	493.9	120.3	314.6	560	79.6	60	779.3	126.3		268.7	35.1	408.5	302	413		35.6	129.5			391.2	1139.8	526	577.4		110.7	229.4	570.3	296.6	150.2													17.09	20.752	30.518	19.226	12.207	18.616	10.681	15.259
238.3	421.5	103.4	120	461.1	35.2	191.3	193.4	637.5		835.6	693.5	1138.7	2076.1	706		1397.7	24.9			45.1	139.5	196.5	649.3		1249.4	827.8	421.3	275.6	158.5													28.992	18.616	21.973	11.902	8.24	18.616	20.142	14.648
330.9	151.2	274.2	64.8	504.8	29.3	531.3	576.3	12.3		93.2	290.4	64.9	20	25.3		268.9	161.9			200.1	223.7	398.5	403.3		341.8	1326.5	51.4	92.8	476.4													13.428	24.719	17.395	24.109	7.324	49.744	28.992	8.24
39.7	57	206.4	43	109.5	64.1	91.2	194.9	36.4		1122.9	59.6	403.3	203.5	53.6		126.4	69.7			157.6	391.2	459.1	31.8		119.5	2332.8	483.6	272.3	32.3													15.869	17.7	15.259	8.24	15.869	25.33	42.114	42.114
253.1	67.1	235.8	106.1	70.4	100	164.5	199	73		369.2	62	646.4	369	31.1		34.8	114.4			1337.4	343.2	736.5	229.7		241.7	120.3	663.1	183.8	384.8													11.902	17.395	85.449	28.992	13.428	45.471	14.038	19.226
48.8	91.6	159.6	166.7	1.8	32	77.2	202.9	292.5		90.4	179.3	357.1	1198.9	40.3		1110.2	235.3			346.2	550.5	43	882.9		209.9	407.6	136.2	13.6	257													32.043	11.292	7.935	18.005	21.057	45.776	25.33	15.869
317.4	407.1	9.7	45.2	157.9	100.7	602.2	1055.3	177.2		312.4	790.3	272.7	375	39.3		524	77.6			51.6	453.9	134.4	63.3		366.9	352.2	66	286.7	18.6													11.597	8.24	8.24	15.564	11.902	12.512	9.46	19.531
199.7	802.6	32.1	277.1	23.7	57.2	321.9	915.9	202.7		764.5	239.1	72.6	19	794.7		37	97.3			267.7	155.7	481	78.2		74.1	1526.4	130	859.4	455.7													11.902	12.207	15.259	11.597	24.719	9.46	8.85	9.46
24.4	311	118.8	136.1	184.1	91.5	195.2	119.6	1173.4		148.7	194	289.4	492.1	364.4		908.7	159.8			799	158	607.3	161.7		505.7	555.8	107.4	183.1	62													17.09	16.785	8.85	9.766	7.629	14.648	10.681	12.512
17.6	37	157.1	253.6	719.8	129.4	266.8	374.3	123.7		199.7	55.6	1313.9	512.8	298.5		370.9	157			33.6	458.2	342	257.8		176.6	197.5	603.4	149.9	311.7													13.123	14.954	19.531	12.207	17.09	18.616	10.071	9.46
61.7	54.6	89	15	104.5	10.3	156.6	52.1	241.5		165.8	61.5	351.3	531.9	71.1		43.4	137.4			50.9	312.5	384.9	331.2		47.2	912.6	31.4	22.2	477.9													21.973	11.902	7.629	7.324	27.771	19.836	13.428	7.935
205.6	13.4	645.9	302.7	43.6	83.5	152.8	467.8	37.2		354	305.8	153.5	974.6	177.7		639.2	98.6			310.2	30.3	491.3	1114.4		839.6	202.7	281.3	732.9	1285.2													10.681	16.785	16.479	8.85	7.324	12.817	30.518	10.681
132	418.2	381.6	106.6	120.4	92.4	588.5	1200.1	77.1		271.4	44.7	1106.9	902.9	229.8		729.4	117.4			41.9	41.9	209.8	958.9		90.4	1053.9	273.5	373.6	338.3													14.343	9.46	36.621	15.869	7.935	9.766	9.46	9.155
48.5	269.2	274.8	42.2	695.4	22.2	45.6	749.7	339.1		131.3	209.5	850.8	654.4	116		1131.5	328.6			54.5	247.2	53.5	1023.2		168.8	2406.7	163.2	58.5	1036.7													9.46	11.902	13.428	11.597	37.231	19.531	12.817	7.935
17.2	12.3	62.8	245.5	165.7	286.4	171.7	70.7	222.2		1946	168.4	153.4	722.2	280.2		2208.5	243.4			269.9	37.1	26.5	64		245.7	3887.8	113.2	665.5	559.2													9.46	8.85	19.531	20.142	9.46	10.986	29.297	9.155
50.4	32.6	35.3	55.3	438.7	69.4	36	27.5	356.3		89.2	139.2	546.3	487.8	162.4		64.7	361.5			47.3	176.8	29.6	133.2		396.9	801.5	239.7	744.5	956.6													14.343	25.94	19.531	16.479	11.597	32.654	9.155	9.766
35.2	158.7	121.7	105.9	304.8	672.5	328.3	508.4	500.2		988.8	213.2	857.1	51.9	37.4		639.8	154			126.2	164.5	290.3	1957.3		234.2	3717.5	142.3	353.3	180.5													13.733	11.902	7.935	8.545	15.564	11.902	12.817	26.855
24.7	95.1	155.4	18.8	382.3	27.3	116.4	142	1159.1		464.1	121.9	69	121.6	209.6		358.5	240.6			235.8	728.3	209.6	565.7		724.4	262	752.3	50.6	329.3													22.278	15.259	9.46	33.264	32.043	17.395	27.771	8.85
35.6	45.4	74.1	126.8	305.8	318.4	79.5	102.1	125.8		216.5	285.1	62.8	186.3	400.5		264.3	369.9			123.4	294.1	845.1	95.8		425.7	1223.8	10.4	187.9	414.6													12.817	17.09	9.155	7.935	6.714	20.447	12.512	34.485
57.1	122.2	206.4	228.5	472.8	37.3	416.9	495.9	199		41.6	57.9	56.6	605.4	54.3		252.3	65.6			437.7	602.1	414.7	506.4		512.9	1608.2	451.1	208.2	81.8													10.376	7.019	7.629	13.123	13.123	11.292	23.193	18.005
62.8	247.2	15.3	24.9	277	80.2	313.1	3467.1	750.9		303.4	24.2	2109.7	85.4	480.5		183.7	454.5			59.5	24	185.6	846.7		406.5	3688.4	187.1	40.8	89.2													10.376	21.973	16.479	12.207	8.545	15.869	16.174	7.935
35.4	133.8	943.5	93.9	25.5	152.2	221.8	919.1	131.2		2334.2	109.3	571.4	1282.9	103		42.4	576			442.1	140.6	479.7	154.1		186.8	47.5	79.7	811.9	755.6													19.226	20.752	28.687	19.531	10.376	14.954	15.259	16.174
41.3	252.2	258	134.3	140.7	65.1	1278.4	578.9	110.6		918.6	1092.2	539.7	2809.2	345		90.3	91.6			420.4	190.7	49.3	350.7		338	589.9	381.4	405.9	70.5													15.259	7.324	7.935	7.324	7.324	26.855	26.245	17.7
9.7	41.3	108.9	285.4	15.3	64.4	52.9	1075.1	312.1		413.6	134.7	406.8	120.6	530.9		460.7	42.1			519.6	205.9	285.1	518		189.7	1221.1	1769.4	237.5	342.2													10.071	19.836	14.648	15.869	6.714	23.193	28.992	7.935
78.7	285.7	97.7	131.1	599.6	162	141.2	103.7	345.3		488.2	191.5	397	431.4	794.7		360.2	18.8			19	214.7	152.7	961.3		676.6	1763.9	338.2	1455.4	271.8													31.738	14.954	7.019	11.597	10.986	27.161	10.071	11.292
109.5	15.2	37.7	166.2	440.7	57.8	252.8	431.8	268.9		765.6	350.5	151.4	128.7	347.1		254.3	512.6			366.8	46.9	915.9	753		67.6	2843.6	34.8	81.8	42.6													24.109	31.128	43.335	8.24	7.324	9.155	13.733	10.681
194.4	19.7	169.2	102.5	853.5	81.7	703.3	731	344.5		463.6	42.2	122	1841.5	169.4		247	65.2			271.6	633.2	77.1	1800.2		40.3	485.1	276.1	87.4	308.2													9.46	11.597	10.376	12.817	7.324	10.986	9.766	10.681
13.6	73.4	77	242.5	135.9	65	53	498.7	101.5		1298.3	241.9	262.5	1053.1	239.8		51.7	884.2			93.1	289.4	135.3	320.9		220.8	1143.7	44.3	777.3	391.1													13.123	18.005	8.545	17.09	7.629	18.005	31.433	22.278
45.1	626.6	38.9	120.1	56.6	140.5	78.6	209.7	187.8		392.7	619.8	166.8	352.3	22.3		400.1	297			245.5	396.8	172.8	733.2		341.9	1073.3	65.4	73.3	335													22.278	27.466	20.447	17.7	24.109	15.259	30.518	9.155
141.1	48.9	256.3	17.1	287.5	46.8	262.2	1528.3	319.3		517	120.2	199.2	252.9	142.5		258	345.5			12.7	189.4	2253.4	1238.7		223.9	140.5	256.5	286.8	138.9													10.681	12.207	15.869	30.518	13.123	11.902	16.479	10.071
16.7	130.7	232.9	18.3	33.6	85	307	1468.8	95.8		257.7	65.4	63.4	528.6	130.9		774.3	425.7			224.6	1453.3	148.5	349.8		41	2132.5	364.2	497.7	30.5													10.071	15.869	13.428	56.152	7.324	20.447	9.766	7.935
8.2	23.7	256	47.4	265.3	139.2	45.1	599.8	281.7		390.8	635.2	1679	284.8	48		879.2	83.3			407	520.2	556	1832.8		142.5	412.4	129.4	61.7	131.7													19.836	28.992	8.545	14.648	10.071	57.678	14.954	17.09
489.8	290.1	46.5	91.7	556.2	17.4	195.1	731.9	36.7		426.7	248.4	564.8	420.7	195.6		1823	105.6			69.9	194.5	308.2	114.4		84.1	210.6	214.9	38.2	222.6													9.766	9.155	7.019	34.79	12.207	21.667	14.343	9.46
186	395.7	173.5	18.9	264.2	37.1	67.4	190.3	1307.9		145.4	338.5	137.7	355.1	69		1324.4	299.3			161.1	461	757.7	21.8		36.3	463.8	378.7	97.6	70.2													25.94	20.447	20.752	8.24	20.752	12.512	18.616	13.428
43.3	52.4	408.4	92.1	494.9	42.1	297.8	466.3	442.7		231	82.8	944	880.5	14		1091.2	641.5			293.8	628.4	281.8	2001.4		180	2462.2	326.9	180.9	488.9													14.648	16.174	25.33	10.071	12.817	21.362	24.109	20.752
85.9	143.7	495.8	84	248.7	36.8	80.6	1254.6	20.3		214.6	407.9	872.6	433	276.4		203.4	200.3			88.2	348.4	346.3	1031.1		600.3	1821.3	368.1	1289.9	184.4													15.259	13.428	27.466	26.855	16.785	13.733	12.512	25.635
125.2	44.2	151.4	113.2	52.6	324.8	604.7	345.6	58.5		62.3	381.2	47.9	776.3	257.6		50.9	209.8			93.7	97.8	45.8	1258.2		135	139.7	19.1	42.5	325.5													18.311	19.531	21.667	8.24	10.071	16.479	10.376	8.85
86.4	125.8	504.2	169.3	88.8	19.6	482.6	77.1	1454.1		622.9	328.1	23.9	505.1	402.1		530	272.8			207.4	370.5	540.9	508.6		605.2	1581.5	188	455.4	329.5													10.071	14.648	12.207	21.973	9.766	11.292	15.869	8.545
615.1	67.8	85	710.7	240.2	10	490.8	98.7	945.1		492.8	12.7	77.7	392.2	413.5		152.7	718.9			63.5	327.3	82.9	264.9		136.6		75.4	28.8	804.5													21.667	14.954	17.395	32.654	8.24	17.395	16.174	24.719
190.9	67.1	129.4	187.5	51.5	142	63.9	279.1	787.4		269.9	38.7	427.5	21	30.7		855	118.2			394.7	283.7	106.3	452.8		178.7		417.4	33.7	194.5													16.479	10.681	15.869	11.292	9.155	14.648	10.376	12.817
269.1	22.5	56.2	477.5	41.8	35.6	16.5	2563.5	65.4		287.6	92	361.7	111.5	106.5		615.7	211.2			206	30.7	386.7	33.2		368.6		204.5	79.6	61.8													11.902	12.512	7.935	15.564	16.479	20.447	22.278	14.648
12.8	319.2	219.4	216	23	174	225.3	585.4	165.2		595	229.3	899.3	307.2	58.3		991.9	23.9			122.8	96.9	174.6	12.2		137.8		69.1	210.6	147.6													23.193	7.629	35.706	9.155	17.395	48.523	16.174	17.09
35.4	390.3	169.4	307	202.3	151.6	298	147.8	423.7		272.9	725.6	1007.6	191.3	23.3		1266.8	322.5			81.4	371	28.2	102.4		208.6		217.1	1280	691.5													9.766	16.174	8.545	24.414	10.986	25.024	10.681	13.733
13.6	164.3	139	429.7	488.9	463.1	107.2	681.8	651.3		85.8	632.7	300.5	323.1	49		745.5	146.4			526.3	178.4	1566.1	247.9		669.9		141.3	200.8	620.6													17.7	20.447	15.564	10.681	11.597	27.771	17.09	9.46
216	78.1	22.4	16	142.9	28.6	728.2	2059.6	97.7		484.2	88.7	668.6	51.5	349.8		33.8	198			21	56.3	947.1	94.8		263.7		613.5	515.7	795.4													9.766	16.174	15.869	10.681	7.019	32.043	22.888	10.986
138	470.2	48.9	168.1	234.1	36.5	246.8	379.8	179		72.4	371.2	828.2	534.5	179.9		555.1	125.7			880.6	274.3	45.7	2248.5		232.8		173.6	63	105.3													24.414	19.531	18.005	19.836	10.986	10.986	19.531	7.935
141.8	168.2	452.7	263.3	476.2	125.1	691.4	142.2	97.3		331.2	231	410	256.3	181.8		787.4	187.4			78.6	60.4	420.5	97.4		248.9		411.6	1604.5	24.7													30.212	18.005	19.531	7.324	7.935	19.531	17.09	12.207
328.1	350.8	370.4	50.4	61.3	252	232.6	175.2	305.8		129.6	95.9	511.9	685	158.5		156.8	109.8			239.9	566.9	381.3	61.6		217.2		371.1	1059.2	523.1													10.376	7.935	16.785	18.005	8.85	42.725	11.902	46.082
149.3	22.3	72.7	312.4	38.4	149.1	61.3	87.6	335.7		766.5	233.2	247.8	482.8	206.1		778.4	718.3			89.1	338.9	517.2	722.6		243.8		49.2	767.5	76.5													12.512	24.414	38.452	11.597	12.207	18.921	13.428	10.376
170.9	58.2	144.8	99	118.7	297	144.4	2449.8	48.9		299.5	327	440.4	564.9	154.8		689.2	1143.2			246.2	233.4	256.5	211.8		229.9		27.8	1490.9	797.1													13.123	20.447	8.85	26.245	6.714	16.174	25.94	9.46
6.5	243.4	50.4	174.9	152.1	194.3	60.8	341.7	213.9		20.9	810.8	115.7	90.1	48		1022.4	63.1			171.9	67.7	818	279.2		258.1		117	2432.8	153.9													16.174	25.024	32.043	18.616	17.09	10.071	20.447	14.954
28.8	48.1	109.7	102.3	355.8	32.7	337.3	2152.8	125.3		46.2	606.1	871.2	369	934.3		24.5	222			37.3	24.5	126.4	59.3		309.6		393.1	711.9	154.5													14.343	13.733	57.678	20.447	19.836	9.155	9.46	12.817
8.5	74.6	132.7	335.4	26.2	167.4	13.1	547.6	654		282.7	141.4	367.5	694.9	269.9		211.2	122.8			278.2	107.4	128.4	193		336.7		195.9	108.2	136.3													12.817	43.945	24.414	30.212	45.776	26.855	10.681	9.766
21.9	196	63.3	131	121.5	20	306	2281.5	106.2		415.3	296.4	379.4	16.2	227		196.8	288.4			375.5	275.2	628.7	361.3		24		165.9	71.9	23.1													18.311	21.057	11.902	15.869	7.629	10.376	16.785	9.155
694.7	194.9	474.4	72.3	327.4	333.1	85.5	647.3	366.1		644.3	54.9	272.9	133.1	704.7		1864.6	378.3			422.2	82.5	702.8	1466.8		842.8		101.2	170.2	250.5													13.123	12.207	13.123	10.681	7.935	15.869	16.785	8.85
153.2	101.3	238.2	14.7	26.8	71.2	1282.5	75.7	621.5		210.8	1222.6	1778.8	786.9	799.4		215.5	403.4			453.3	579.6	501.2	78.5		490.6		1008.9	905	347.5													9.766	13.123	14.648	7.324	21.362	16.174	26.855	9.155
282.3	64.5	185.2	30.8	472.2	68.7	244.1	254.7	104		655.3	288.1	340.8	143.1	114.4		1378.3	49.4			279.5	29.9	390.1	191.3		135.2		833.6	744.9	451.5													23.499	29.602	9.766	23.804	23.193	31.738	17.395	29.602
258.7	116.7	85.9	59.7	198	45.5	382.7	255.7	140.6		188	16.7	474.1	467.2	160.2		410.8	297			693.1	212.6	289.4	861.1		89.5		559.9	206.2	129.4													13.428	14.343	24.109	12.817	10.986	12.817	17.395	8.85
146	252.2	478.3	89.4	118.2	71.3	140.5	1216.2	153.6		201.5	421.7	353.3	359.1	460.5		17	49.8			92.9	214.9	183.8	951		245.4		204.3	412.9	357													13.123	9.155	16.479	37.537	11.292	31.128	19.226	13.428
8.2	146.5	72.1	141.8	31.1	199.2	1008	2381.8	135.3		172.6	637.5	609.1	1718.9	475.4		838.3	76.2			135.2	29.2	470.7	114.1		21.6		1888	237.3	80.8													15.869	11.597	9.155	21.057	10.071	20.142	25.024	14.648
57.3	38.4	96.2	61.8	160.6	5.8	456.4	322.4	51.8		454.4	119.8	877.7	226.1	101.1		335.6	103.9			530.2	158.8	315.1	570.9		94.7		479.1	17.6	305.9													17.395	19.226	19.226	17.7	10.071	18.616	11.902	14.038
37.1	31	112.5	382.9	21.7	98.9	33.5	1297.6	87.5		175.4	267	265.6	1438	333.6		36.2	208.9			546.3	718.8	1393.5	1104.5		38.5		381	248	260.4													11.292	9.766	14.954	12.817	7.019	25.33	11.902	10.681
67.8	164.7	66.9	99.7	137.3	51.9	912	1211.7	441.9		137.4	151.1	345.6	3279	294.6		189.1	175.6			105.9	122.3	859.6	1380.1		176.5		74.4	613	68.6													11.902	15.564	15.869	7.935	15.869	26.245	21.057	9.46
105.3	33.6	416.7	38.5	179.8	81.7	138.9	1921.4	110.3		184.9	48.4	91.5	949.2	253.3		602.5	83.3			278.9	126.2	155.8	1209.3		2555.7		15.6	137.1	722.4													13.428	13.733	16.174	9.46	19.226	15.869	17.7	56.152
147.6	93.5	318.2	72.8	228.1	530.3	494.9	772.2	103.1		507.8	359	54.8	747.7	512.7		114.9	168.5			515.8	94.3	414.9	25.7		1450.6		536.7	157.7	243.4													12.207	15.564	14.343	10.376	27.771	14.648	8.85	8.85
53.1	182.4	37.1	395.7	135.8	361	23.6	284.3	963.2		341.5	698.1	721.8	616.7	322.7		170.9	881.5			31.5	50.6	182.3	56.1		72.9		625.5	506.4	294.8													12.817	12.207	13.428	20.447	13.428	10.376	10.681	13.123
61.8	147.7	80.4	418.9	100	46.7	458.3	133.5	152.9		532.1	612.5	802.9	102	282.5		851.7	17.1			109.6	54.5	353.6	281		354.4		204.3	166	288.2													17.395	9.155	21.667	7.324	24.719	38.452	13.428	17.395
152.2	98.5	80.1	392.6	33	341.8	982.5	312.5	1596.2		558.4	132.4	56	135.1	120.7		235.2	300.5			119.4	80.5	36.3	272.3		47.7		784.6	277.4	376.9													13.123	11.292	7.935	7.629	11.902	17.395	10.681	10.986
152.1	28.3	113.2	27.8	391.1	93.3	112.6	2028.9	34.8		298.9	315.6	172.8	475.3	551.4		161.4	232.2			25.5	42.5	65.9	556.7		1842		156	33.3	353.7													14.038	7.019	33.264	8.24	7.019	64.697	9.766	15.869
313.4	329.5	74.5	214.4	176.1	94.7	97.4	1534.8	310.8		1213.8	99.5	257.6	379.5	165.7		97.2	126.3			728	109.2	95.3	230.9		875		77.2	158.5	88.6													14.954	8.545	18.005	11.292	20.142	14.648	13.733	10.681
148.4	215.5	117.3	88.9	385.2	13.1	575.1	438.4	448.5		109	435.2	206.6	705.3	33.5		1651.7	171.3			376.1	40.8	357	1498.5		175.2		135.9	233.8	418.3													21.362	10.071	38.147	9.766	9.46	12.512	15.869	17.7
36.4	247.6	39.5	279.7	93.4	211.6	950.3	944.1	93.1		90.1	140	24.9	1536.3	58.4		538.8	417.1			52.8	317.3	2245.1	403.7		123.5		368.6	350.3	256.5													9.46	15.564	16.785	18.616	14.343	9.766	24.414	11.902
139.8	40.2	81.7	294.9	304.8	20.4	40.9	252.3	107.9		141.4	30	134.7	254.5	287.1		57	747			228.3	101.3	390.2	252.1		272.6		720.3	210.4	237.5													9.766	16.785	11.597	18.616	10.376	12.817	12.207	33.264
47.5	175.1	237.3	123.8	234.5	32.5	1036.3	2802.5	144.3		153.1	170.7	551.8	820.6	70.8		603.4	321.4			48.1	157.1	659.8	504.3		556		484.7	25.3	483.3													10.681	6.714	18.005	12.817	9.46	22.888	29.602	14.343
70.6	75.7	147.8	137.5	564.1	9.4	18	177.3	109.2		155.4	122.6	48.6	537.9	142.3		412.4	233.8			21.2	301.9	395	232.5		173.8		228.7	45	918.2													13.733	20.447	11.902	27.161	12.512	29.602	10.376	15.259
43.8	139.7	28.8	68.5	81.5	25.6	424.9	7.5	314.3		22.5	128.7	989.9	966.2	139.1		101.9	670.9			78.2	308.1	162.8	151.4		24.2		338.9	234.5	593.5													10.071	25.635	22.888	24.719	11.902	38.147	15.564	12.817
119.7	96.2	75	183.1	557.1	315.9	310.9	235.2	138.9		658.5	276.2	190	160.1	190.4		201.1	110.9			187.9	804.1	622.8	428.1		669.9		1218.5	169	59													10.071	7.935	20.142	7.324	12.207	22.583	8.85	59.509
62.6	47.1	68.6	104.9	117.4	287.5	61.5	671.3	386.4		2263.7	288.2	416.3	199.5	596.4		282.8	200.1			386.1	131.6	628.6	323.5		82.3		473.4	515.5	87.7													21.057	17.395	15.259	28.381	9.766	42.114	16.479	11.902
212.8	252.6	118.5	129.4	136.8	69.9	699.2	421.3	374		323.5	232.5	448.1	526.2	102.1		134.8	42.9			191.1	134.5	603.6	601.9		153.5		299.5	269.2	573.8													15.564	7.324	18.616	26.855	7.629	12.817	11.902	8.85
58.3	124.3	328.7	166	26.7	325.8	633.1	181.4	837.6		2406.4	157.5	428.5	2261.9	308.9		146	225.5			372.2	200.2	520	275.3		831.3		70.2	100.3	20.9													13.123	14.343	30.212	11.292	17.7	21.362	14.648	13.123
20.8	582.2	102.1	378.9	62.1	97.4	69.9	1060.6	347		1144.4	351.9	22.1	831.4	176.3		73.1	749.5			428.6	74.6	89.9	543.6		496.7		419.6	1213	318.4													16.785	15.259	7.019	69.58	14.343	14.954	9.46	25.33
14.1	276.5	15	1	531.7	60.6	152.5	106.6	226.3		673.2	682.9	383.6	366	73.3		394.1	151.3			478.9	148.9	1328.1	102.5		698.6		71.6	777.4	410.5													25.635	25.94	20.447	67.139	7.019	10.681	18.616	15.259
77.9	645.9	105.3	61.4	270.9	18	448.7	1028.6	589.2		534.6	139.7	112.9	397.1	265.3		255.2	226.1			105.3	668.9	296.6	107.6		407.4		65	127.5	206.6													26.245	9.155	11.292	17.7	11.597	10.376	21.667	8.85
200.8	129.3	11.1	46.5	258.8	113.5	688.2	240.5	391.3		63.6	194.4	119	704.8	386.4		397	45.7			193.8	259.7	227.7	503.1		191.6		226	27.3	458.3													26.855	7.629	28.992	10.376	18.311	32.654	11.292	30.823
42.9	360.3	450.6	26.3	52.8	66.4	382.3	1469.9	828.7		1258.5	1292.6	743.1	328.4	113.4		112.2	602			83.7	451.6	46.4	650.2		397.1		26.9	516.1	1680.3													22.888	19.531	13.733	17.395	16.785	12.512	32.959	14.038
46.5	204.5	779.9	144.7	244.8	175.7	34.7	1563.4	1377.1		76.5	642.9	193	1783.2	106.6		82.4	155.5			84.8	678.7	166.2	437.1		605.1		241.8	411.3	392.5													29.907	31.738	16.479	8.24	11.292	20.142	14.038	8.85
141.7	253.6	192.6	21.9	29.6	21.6	963.2	89.3	803.2		11	43.4	66.7	1019.5	65.6		931	149.1			230	121	390.1	90.6		151.4		284.8	978.9	359.2													9.766	11.597	28.381	10.071	12.207	11.902	25.33	15.564
227.4	179.4	71.4	205.1	427.6	134.4	632.4	310.6	66.1		33.1	463	407.5	1025.1	359.1		178.4	86.2			110.6	437.5	434.8	290.6		318.7		1026.6	649.5	108.8													13.123	16.174	18.005	30.518	7.019	22.888	36.316	7.935
104.9	122.8	19.2	81.3	23	66.3	683.9	1836.5	845.7		74.1	41.8	461.1	434.3	31.1		646.8	160.9			364.2	1181.9	25.7	139.8		54.7		287.3	183.3	785.4													13.733	23.499	8.24	18.311	21.973	19.226	15.564	8.24
99.6	62.6	74.7	587.3	41	53.9	209	231.5	332.7		489.4	122.7	26.6	235.5	72.3		124.3	350			48.4	53.6	485.9	342.7		84.7		248	123	236.4													14.954	18.921	20.142	15.869	7.019	11.902	18.005	12.512
526.3	216.9	345.5	59.5	446.2	87.1	283.6	171.4	658.6		334.5	37.6	219.6	186.4	182.8		1019.6	105.3			389.4	543.4	23.9	229.4		511.4		270.5	171.8	336.8													22.888	8.24	24.414	9.155	15.259	34.485	17.395	8.85
51.6	92.6	18.7	291.6	504.1	41.9	315.4	1721.1	114.8		392.8	719.9	2065.6	367.6	39.3		186.3	10.2			301.1	782	268.1	840.2		941.2		620.7	1006.5	352.8													13.733	14.038	15.869	10.071	7.629	18.005	38.147	28.076
138.3	56.2	151.3	269.9	47.4	472.7	40.7	1882.8	271.3		414.6	663.9	156.6	207.7	303.8		501.4	157.4			43.9	381.1	17.6	64.9		155.6		449.1	179.1	71.7													13.428	20.752	21.667	30.212	7.629	12.817	9.155	13.733
151.4	62.1	790.7	193.4	280.3	28	251.5	403.2	369		623.4	68.5	1458.2	515	1635.7		973.3	73.3			818	940.1	150.5	58.5		1163.7		44.7	611.3	352.8													14.343	7.019	27.161	62.256	38.757	13.733	10.986	7.935
107.1	153.8	529.2	0.6	216.8	186.4	9.1	1165.5	251.3		916	65.5	37.6	1053.3	244.3		624.2	195.4			39.3	109.9	863.8	43.6		938.1		52.1	88.9	77.9													12.512	12.817	9.155	64.697	9.155	14.343	9.46	9.155
32.2	390	32.8	482.6	511.1	22.3	198.9	128.5	44.4		848.2	307.9	250	337.5	185.8		84.9	452.4			590	208	41.5	108.9		978.4		116.5	279.6	384.9													25.635	13.733	8.85	14.954	23.193	9.155	10.681	10.071
42.1	311.2	52.3	57.1	595.5	24.1	323.4	43.2	294.6		280.1	277.7	217.4	518.1	23.5		147.2	510.5			364.4	632.2	723.9	39.2		41.9		255.6	179.4	178.9													10.681	16.785	14.038	21.973	7.935	21.973	26.55	14.648
98.6	118.3	79.6	140.1	310.4	27.2	784.8	99.9	1410.6		664.1	65.6	159.9	731.6	542.3		714.5	234.8			210.9	296.5	127.2	486		44.5		91.4	281.4	174.1													12.207	18.616	8.545	9.155	14.954	16.174	8.85	9.766
23.8	142.9	311.1	108.6	118.6	33.6	62.9	1037.3	139.4		774.7	49.7	813.4	881.2	1154.5		509.3	350.3			808.3	357.1	613	111.3		66.5		365.1	411.5	63.1													12.817	25.33	7.935	39.978	11.902	24.719	27.771	9.155
152	29.9	33.1	135.4	161.3	51	116.1	596.2	136.6		174.2	48.5	390.3	373.5	63.8		100.8	166.3			136	353.3	490.3	175.1		52		462.3	519	790													10.376	18.311	11.597	23.499	16.174	19.226	23.804	18.005
394.5	156.8	352.1	35.2	283.4	122.4	135.5	322	223.9		473.7	210.6	1260.7	89	767.4		110.5	341.1			416.9	125.1	302.3	20.9		615.2		355.2	422.6	83													24.414	6.714	10.071	9.155	14.954	17.395	22.583	18.616
73.9	457	156.2	58.5	74	172.8	1154.3	885.8	32.3		141.2	162.7	543.1	433.6	73.8		312.6	539.6			352	290.9	233.3	131.5		451.8		151	381.8	182.3													10.071	7.019	10.376	24.109	13.123	19.836	16.174	7.935
21.7	206.8	108.2	220.2	47.2	54.5	320.5	863.9	619.5		596	194.7	241	159.3	292.5		541.6	165.2			319.1	134.6	623.9	332.1		133.8		602.8	149.9	152.2													19.836	8.85	8.545	41.504	7.935	18.921	9.766	22.583
142	19.6	179.5	196.2	235.8	35.9	211.6	768.2	216.6		231.7	542.4	185.3	1596.2	22.6		796.2	374.3			286.9	610.9	348.8	31.1		29.7		449.5	886.9	17.6													17.09	37.231	10.681	7.324	15.869	17.7	8.85	17.09
105.2	29.7	382.9	68.9	77	153.1	454.6	825.2	604.7		308.1	125.7	559.9	178	175.6		19	118.3			306.3	126	1077.2	265.4		105.9		647.6	520.2	371.5													14.954	21.362	8.545	11.292	13.123	30.518	28.076	11.597
334.2	53.1	192.5	113.7	48.5	86.2	1304.7	94.4	305.3		46.5	503.9	252.1	561.5	517.7		1603.3	106			224.5	419	162.2	47.4		273.1		981.1	328.4	124.7													14.038	10.681	14.954	26.855	8.24	10.681	11.292	34.79
267.8	387.7	33.7	64.1	152.7	56.1	35.1	686.5	40.5		58.7	258.2	2423.5	119.2	224.4		415.6	307.9			137.5	324.2	380.1	167.5		74.5		117.1	2510.4	159.6													16.174	16.174	7.324	10.986	10.681	16.174	11.292	20.447
7.8	38.2	91.4	59.3	49.4	12.1	255	408.7	848.8		123.6	498.3	54.6	913	260.7		1583.9	48.8			518.3	111.8	147.8	1017.9		168		717	726.4	288													10.986	8.85	9.46	21.362	11.597	13.733	10.986	11.292
475.7	40.2	84.9	44.1	208.6	105.6	820.1	169.4	67.2		249.8	13.3	22	845.5	179.7		117.2	40.3			287.5	431.3	954.3	519.6		205.1		83.3	90.7	1025.1													10.681	8.545	9.766	7.629	20.752	58.289	24.719	7.935
102.7	12	30.9	199.5	892.5	150.3	373.1	16.8	14.6		302.8	199.3	1233.7	317.3	205		631.3	218.4			74.1	136.6	288.5	43.3		1902.4		303.8	368.5	260.4													11.292	37.537	11.292	8.545	9.155	17.395	14.648	8.545
13.7	78.4	116.4	281.5	108.7	34.1	318.2	87.6	48.5		280.4	27.7	83.8	975.9	118.2		86.9	35.7			133	100	117.5	344.5		635.5		230.1	3082.6	234.8													9.766	15.259	10.986	11.902	18.616	15.869	12.207	9.155
41.6	66.9	18.4	41.9	712.1	223.6	902.3	124.5	533.5		62.7	240.7	871.4	631.9	79.8		216.3	100			28.5	331.3	298	302.7		95.7		506.4	205.8	141.1													21.667	18.005	21.057	9.766	9.155	11.597	32.654	14.648
113.6	369.4	584.5	66.8	142.7	307.9	424.6	260.3	346		94.2	78.4	1420.5	216.3	49.2		93.2	18.9			106.3	107.9	1277.8	280.4		986.1		131.2	385.3	309.3													31.128	32.654	11.292	14.954	50.964	46.997	25.635	9.46
26.6	141.5	41.7	511.5	430.4	146.3	1587.6	1969.1	204.6		1600.9	375.4	888.2	380.2	38.4		968.5	191.4			33.3	934.1	171.2	43.7		1368		546.3	344.9	23.8													18.616	13.733	8.545	10.376	10.986	14.038	9.46	9.46
99.5	299.9	262.7	130.1	16.5	150.4	362.3	608	980.6		179.8	87.8	1683.1	2069.4	138.9		109.7	76.3			425	283.3	463.6	142.3		277.5		9.2	339.7	434.2													11.292	14.954	12.512	20.752	7.629	20.142	25.024	8.24
168.4	320.6	33.1	391.4	418.1	60.3	508.2	1410	136.7		276.2	208.3	144.7	23.2	57.9		196.5	338.4			212.4	110.7	159	189.5		12.2		228.1	576.8	452.4													10.376	13.733	10.071	8.85	19.226	16.479	11.292	8.545
182.3	168.9	35.4	152.8	109.2	153.5	190.6	61.2	162.1		13.8	107.3	1661.8	590.3	106.9		141.2	90.8			134.7	249.6	45.7	757.1		116.3		80.5	398	127.2													23.193	23.193	7.935	12.512	17.395	16.174	16.174	30.212
97.3	83.3	152.9	323	281.8	38.5	158.4	502.8	74.9		215.5	224.7	59	109.3	246.4		16.9	119.5			179.5	76.2	136.9	705.6		75.4		35.7	269.3	188.9													13.428	21.667	15.259	9.766	13.123	11.292	31.128	8.85
63.9	128.8	210	237.9	313	107.8	243.5	345.5	149.7		357.4	148.8	896.2	660.7	130.1		1215.2	73.8			247.8	633.8	140	286.6		11.4		1010.6	430.5	536													13.733	17.395	7.324	25.024	15.564	18.921	12.207	13.123
98	134.3	207.7	199.8	125	51.9	45.7	265.2	663.5		659.3	177.2	1378.2	422.6	251.2		3009	129			87.9	672.6	772.8	292.7		85.4		579.2	106.1	357.5													19.836	21.973	24.719	8.24	7.324	10.376	12.817	87.891
212.7	547.8	1277.1	178.2	174.3	114.5	67.4	378.1	56.9		341	77.9	1586.3	68.3	259.1		27.4	63.9			192.6	100.5	657.4	12.3		180.9		147.8	169	143.9													24.719	7.019	14.343	13.733	13.428	17.7	10.681	89.417
96.7	18.1	37.8	30.1	418.7	134.6	72.7	62.2	22.4		130	372.1	202.3	247	205.9		147	998.9			98.1	56.9	89.6	44.6		819.3		29.9	393.5	28.9													23.193	10.681	8.85	15.869	10.681	22.583	8.85	7.935
22.7	264.2	484.7	223	16.9	488.9	40.1	409.6	35.4		796.6	183.5	1039	329.2	167.2		95	477.9			615.3	369.4	473.2	183.5		13.2		375.1	1150.1	310.4													11.902	18.005	11.292	26.55	13.428	14.343	10.071	9.766
41.7	119.7	108	29.1	537.8	56.6	140.1	120.6	537.5		383.2	171.4	93	1154	44.1		439.4	129.3			167.7	372.9	91.5	413.5		69.7		849.9	1305.9	444.5													22.583	18.005	14.038	15.259	10.071	17.7	15.259	8.24
76.6	221.4	90.9	364.4	229.1	16.5	271.1	998.6	13		613.5	20.4	50.3	272.8	453.9		259.1	59.9			1113.4	576.5	676.4	648.9		574.6		357.3	3119.4	644.4													12.817	11.597	21.973	15.564	17.09	11.292	15.869	9.46
56	662.3	127.9	150.7	312.3	86	345.6	354.8	226.2		328.8	130.4	375.4	131	118.9		885.8	88.7			101.8	509.2	274.5	706.9		120		1168.8	178.5	248.7													11.902	13.733	7.629	31.738	7.324	20.447	18.921	48.523
34.1	356.9	92	76.9	106.4	99.8	62.8	449.8	335.4		426.1	808.7	100.8	93.5	284.8		142.5	64.7			86.9	272.4	283.1	81.9		110.5		381.8	13	326													14.648	10.376	7.019	23.804	8.85	20.752	10.986	7.935
62.6	48.2	418.3	43.7	610.7	275.1	95	333.6	1070.3		101.2	953.5	3603.9	674.5	118.6		94.5	315.7			194.2	194.8	530.8	66.9		283.9		607.8	362.2	197.6													22.888	30.518	12.512	12.817	15.564	16.174	9.155	11.292
389.3	44.1	85.5	379.9	605.2	33.5	178.1	405.3	842.6		777.7	239.7	296.5	1573.3	129.8		37.1	120			1259.4	210.5	167.7	177.3		201.5		822.3	108.6	188.7													11.292	27.771	12.512	23.499	9.155	19.226	8.85	10.376
89.7	626.5	780	409.5	308.4	58.5	20.3	1434.4	142.7		141.6	191.3	956.9	466.9	21.3		197.8	269.6			159.7	42.1	859.6	286.3		35.8		546.3	183.3	189.9													32.959	19.836	7.324	7.324	17.7	14.343	27.466	9.155
94.9	935.4	94.8	304.7	43.9	64.1	279.6	426.4	161		564	668.6	141.4	502.3	555.2		555.5	830			147.8	119.7	320.1	289.7		369.1		66	204.9	56.4													15.564	13.428	10.376	8.545	17.395	21.973	13.123	80.872
90.7	27.4	162.9	100.9	44.1	33	185.4	898.2	61.1		747.1	131.3	120.9	59.6	126.6		1084.4	135.4			92.5	96.3	201.3	229.4		147.2		434.8	785.9	74.9													20.142	25.33	15.564	14.648	14.954	12.817	18.616	46.082
25.5	461.6	42.9	283.3	478.7	102	252.7	506.2	57.6		83	358.8	548.3	341.5	47.4		1231.8	77.5			30.6	529.7	429.5	238		621.4		379.4	68.5	318.7													11.597	36.316	31.738	15.564	25.635	26.855	10.376	9.766
173.9	422.8	69.3	326.6	304.2	139	27.8	701.1	75.9		215.8	40.5	130.5	964.1	44.9		350.8	35.9			144.9	43.3	377.6	97.8		251.9		464.9	857.4	274.9													14.954	6.409	9.766	31.738	11.597	14.038	9.46	7.935
43.7	189	58.1	86.7	78.2	32.7	322.3	507.8	463.1		1939.1	22.5	825	322.5	120.7		249.3	414.9			556	274.9	66.9	895.7		794.1		200	810.5	646.9													18.311	35.706	9.46	14.038	8.85	10.376	28.381	37.537
39.3	886.7	53.9	58.1	98.1	311.2	144.6	174.7	49		95.3	72.2	550.6	10.9	115.7		148.8	152.1			107.1	70.9	912.5	1026.1		939.2		1508	614.4	131.4													14.648	6.409	9.155	7.935	11.597	12.817	10.986	9.766
60.2	265	76.7	102.5	224.6	83	909.4	1361.8	190.6		2257.2	63.5	562.4	239.4	457.7		1336.7	427.6			228.9	59.8	161.6	1915.8		595.5		122.7	653.6	40.4													9.766	12.207	28.992	20.142	21.057	18.311	20.447	17.395
39	265.5	220.9	33.6	32.4	169.9	320.5	573.2	417.5		354.9	272.6	2543.3	396.8	507.5		359.8	509.9			309.5	327.7	942.9	371.1		14		43.9	159	192.2													16.479	16.479	21.667	10.376	28.076	17.7	20.447	11.597
37.8	269.8	119.5	82.3	518.1	16.8	468.5	902.5	42.1		856.9	98.6	1205.6	96.8	90.9		390.5	196.1			189.3	251.3	54.5	54.7		161.8		30.3	807.6	383.6													13.428	8.545	13.733	9.766	12.817	11.902	26.55	8.85
36.1	40.3	378	117.7	170.9	11.1	216.9	237.4	172.3		370.6	19.3	811.7	1269.1	125.5		550.3	456.8			209.4	267	441.4	542.4		173.2		195.1	489.5	19.8													16.174	6.409	15.259	16.479	23.804	21.667	16.479	50.659
147.6	132.6	44.8	118.9	296.6	149.6	62.9	560.1	52.1		1097.9	200	338.3	726.4	175.1		605.9	465.9			43	186.1	483.8	876.1		117.3		668.4	21	73.2													15.259	13.428	7.019	22.583	7.935	28.381	9.46	10.376
91.6	189	93.4	163	203.5	339.2	389.9	315.1	1017		1300.5	59.9	922.8	696.3	193		99.7	399.5			403.2	573.1	630.7	728		22.3		117.7	243.9	243.2													10.986	15.564	8.24	30.212	26.55	18.616	8.85	9.46
173.2	128.9	401.3	230.8	94.6	41.2	404.7	644.8	46.2		794.7	44.7	2152.1	893.7	276		1781.2	513.2			47.2	310	158.2	360		53.3		344.4	32.4	532.4													18.616	25.635	24.109	24.109	36.011	14.343	22.888	16.785
94.1	332.7	79.5	140.3	25.3	23.8	121.4	295.6	281.4		126.1	287.6	252.6	562.4	585.2		323.9	264.1			31.7	71.2	404.9	1119.9		17.2		913.8	568.1	117.5													26.855	24.719	9.155	9.46	9.155	12.817	18.311	11.292
64	274.1	112.6	7	125.9	131	339	166	1077.6		1624	375.5	197.1	184.7	198.3		187.7	112.5			64.5	239.3	360.7	412		226.6		371.6	1355.1	224.4													14.954	16.479	23.499	8.85	8.545	9.155	19.836	40.283
68.9	863.5	210.5	50	64	136.7	253.4	330.6	503.5		73.2	24.5	138.4	164.4	189		173.7	410.7			140.1	89	56.4	259.1		593.8		679.3	344.8	94.6													11.597	32.654	28.076	16.785	7.324	9.766	10.376	17.7
37	410.5	92.9	60.1	283	46.8	296	50.4	1838.4		426	164.4	268.6	112.9	170.4		1394.1	241.7			1544.9	272.6	187.8	924.4		54		137.8	134.4	144.7													21.973	22.888	11.292	23.499	13.428	12.817	13.428	21.057
84.9	198.7	25.1	127.7	76.2	190.9	307.3		95.7		739.4	187.7	1415.3	170.8	33.3		67.6	33.9			106.1	876	115.3	37.1		830.6		610.5	323.3	269.1													21.362	15.564	7.629	28.076	14.648	10.986	27.771
33.7	37.5	18.7	25.9	135.9	89.5	44.4		150.8		367.1	247.3	639.3	115.9	226.6		1542.7	271.5			26.1	682.7	378.1	556.2		132.9		163.7	353.8	354.4													18.005	12.512	11.902	8.85	10.681	12.817	21.057
60.5	623.9	71.5	108	178.9	16.5	151.4		564.5		586.9	803.4	26.2	748.3	143.2		440.9	259.5			632	34.6	403.4	147.3		234.5		1086.8	1172.6	384													28.992	8.24	15.564	22.278	14.343	12.817	10.071
305.7	214.9	59.9	39.1	180.2	49.3	258.9		422.4		248.7	34.3	316.1	430	683.3		1492.8	376.8			149.6	1166.6	67	136.8		521.2		155.2	735.7	184.9													9.766	25.024	8.545	7.629	15.564	15.564	9.155
47.7	815.6	54.8	103.3	236.4	21.5	240.7		351.2		1286.7	97.7	659.8	1257.9	175.6		123.7	247.2			58.7	167.7	47.6	604.8		1115.3		147	1023.2	256.2													19.836	13.733	10.986	11.292	8.545	43.945	18.311
19.7	388.9	68.1	78.6	27.7	46.3	370.2		356.3		296.6	27.5	729.3	1590	13.4		141.2	122.6			209.1	215.8	117.7	210		17.9		435.9	159.4	270.1													15.564	6.409	11.292	28.992	10.986	9.155	8.85
162	457.7	440.7	50.7	59.7	115.4	50.9		273.1		40.4	487.5	323.5	940.8	94.4		352.1	158.3			12.8	77.1	102.8	431.5		300.2		393.5	1240.4	144.9													14.038	13.428	14.954	26.55	19.836	20.752	25.33
71.9	13.3	42.8	0	49.1	201.6	906.7		23.8		1288.1	444.6	292.7	111.1	65.9		1381.8	471.5			230.7	115.9	403.8	70.8		44.5		488.5	54.7	371.4													15.869	18.921	28.381	26.55	14.038	19.531	28.381
166.4	141.5	186.7	442.3	179.4	41.3	124.3		1197.5		127	51.4	409.4	125	270.6		304.9	860.2			422.6	192.2	68.9	240.5		427.1		398.4	268.8	34.2													27.466	11.902	10.681	18.005	14.038	31.128	19.531
38.4	3245.1	156	20.7	138.9	171.7	42.3		262.5		166.8	31.2	240.2	652.4	87.5		334.5	666.3			109.3	114.8	120.1	361.6		67.5		478.6	821.5	129.8													9.766	21.667	8.85	10.681	24.414	10.071	36.621
239.7	340.2	416.7	66.3	18	82.3	328.3		631.4		984.4	76.2	2213.8	559.9	462.8		199.5	153.5			173.4	221.2	100	694.5		657.3		367.2	827.8	869.1													9.46	7.935	22.583	9.155	33.875	17.09	25.33
38.3	123.1	110.3	85.6	474.5	252.3	36.5		885.9		497.8	75.2	3668.6	320	113.4		135.6	86.7			41.5	39.3	174.3	100.1		337.7		209.4	120.7	319.7													9.766	10.376	13.733	12.512	18.005	11.292	13.733
158.8	646.3	223.2	32	297.5	16.7	375.1		426.6		488.4	225.9	90.6	56.8	91		100.9	1389.1			25.2	277.3	19.2	434.1		371		496.8	183.1	38.4													24.719	11.902	20.142	11.597	6.714	17.09	10.376
23.8	127.3	141	44.2	142.4	55.4	292.3		157.3		578	77.3	337.9	16.5	12.4		497.7	217.6			344.9	325.1	138.6	736		227.1		33.3	205.1	33.4													24.414	7.019	7.019	15.564	7.935	22.278	11.597
467.2	462.6	206.2	260.2	170.2	13.7	337.3		687.4		71	65.3	647.8	108.1	418.1		171.6	69.7			441.1	143.3	138.5	184.9		418.4		145.8	191.8	257.8													12.512	8.85	14.954	20.447	7.324	14.648	10.986
249.1	316	971.1	175.3	129.8	117.9	92.4		717.8		66.6	94.7	510.8	154.1	55.6		54.4	126.5			1175.9	79.7	628.2	42.5		893.7		312.4	297.6	538.1													10.071	6.714	18.616	10.071	7.935	15.259	23.804
57.1	68.7	288.7	34.6	294.1	36.4	1009.2		563.7		335.5	322.7	1233.7	446.4	19.6		789.1	186.5			127	92.2	25.5	737.6		79.3		25.1	36	327.7													10.986	28.992	19.836	14.038	13.428	27.161	22.583
47.6	166.9	24.2	24.9	226.9	124	236.6		887.8		2046.1	86.1	57.9	514.3	227.2		184.7	333.5			504.3	137.4	164.7	196.9		255.6		145.5	165.8	453													12.817	24.719	25.635	26.55	9.155	10.681	15.259
58.3	336.7	192.8	70.7	786.7	112.1	534.8		366.1		376.2	34.9	288.8	259.4	29.6		43.3	115.2			274.8	684.8	124.9	743.1		326.5		815.5	1063.2	1149.6													15.564	19.531	15.259	23.804	7.935	18.005	23.193
30.8	466.9	38.7	435.4	63.4	26.1	427.5		444.9		454.9	69	264.4	1087.7	154.5		337.4	172.1			268.4	189.1	187.5	284.5		120.6		232.2	566.6	273.1													13.428	8.24	13.733	22.888	9.46	43.03	9.766
76.1	260.8	238.1	129.8	352.7	172.5	211.6		434.3		225.9	515.4	31.3	19.9	112.5		496.5	116.1			45.5	481.1	183.4	2610.3		663.6		1230.7	177.8	86.7													39.978	11.292	7.935	12.207	14.038	19.226	10.071
73.7	64.8	423.2	192.4	240.3	268.9	147.4		253.7		780	116.4	194.9	19.3	56.3		545.3	349.5			540.5	307.4	14.9	1677.4		430.4		32.8	26.4	541.2													13.733	23.193	8.545	34.79	17.395	11.902	29.602
73.5	567	589.7	49	384.7	362	448.2		158.1		95.8	94.3	828	311.3	44.3		702.4	399.7			360.1	94.4	434.2	388.2		361.8		441.6	205.5	49.5													11.597	20.752	21.973	12.207	12.512	20.142	8.85
157.7	801.6	225.4	141	40.9	104.4	872		170.1		926.8	401.5	254.9	326.8	55.4		541.8	11			765.5	106.1	212.6	127.4		421.3		43.5	335.3	55.2													25.024	13.428	21.362	13.123	23.499	33.875	11.902
61.1	52.2	48.2	93.3	44.6	513.6	344.5		179.6		59.6	63.8	693.3	81.9	60.7		341.3	245.3			157.8	1304.4	313.1	1139.7		278.7		482.7	93.5	44.9													10.376	7.935	10.071	10.681	7.629	35.4	30.823
53.4	467.7	85.7	135.6	261.8	106.4	142.8		320.2		124.7	282.1	232.7	881.4	171.9		140.4	177.1			790.5	474.1	73.8	119.6		480.6		1358.5	1049.1	253.2													10.071	22.583	16.479	28.381	11.597	43.335	24.719
13	64	146.7	59.3	115.5	87.3	746.8		79.5		825	295.3	828.4	218	187.8		742.8	58.6			238.6	78.6	26.8	95.6		727.4		62.9	14	197.3													15.564	9.155	21.973	10.071	7.935	10.071	9.46
57.3	479.8	251.6	85.1	105.3	132.6	146.2		62.5		955.2	74	2941.3	264.8	175.5		2211.2	59.8			269.6	25.1	37.7	1259.6		516.9		182.4	106.6	43.3													14.648	14.038	10.681	9.766	33.264	14.343	20.447
124.2	94.1	82.7	141.6	150.1	112.8	379.8		498.2		578.1	362	802.8	711.5	153.3		2325.7	231.5			22.6	571.7	97.3	1720.8		17.3		84.3	723	175.8													13.123	7.324	7.324	36.926	14.343	16.785	18.311
59.6	670.7	273.9	88.9	58.4	9.2	119.4		87.1		2101.5	194.9	1575	124.4	71.1		441	355.5			527	163.9	90.3	323.9		182.6		1178.5	27.8	74.4													9.766	7.019	7.324	18.616	9.155	10.376	24.414
83.7	29	249.5	39.7	452.8	141.1	68.4		9.7		198.5	85.1	72.1	1666.4	24.6		170	184.9			153.9	117	27.8	2050.9		89.1		142.8	756.9	51.2													14.954	24.109	26.55	19.531	17.395	51.88	24.414
151	389.9	358.1	293.3	171.5	19.2	35.7		37.9		104.3	39.5	891.4	1027.5	33.6		151.1	76.6			164	150.2	39.9	1056.6		100.8		926.2	169.8	288.5													9.46	16.174	7.019	20.447	14.038	20.447	12.207
36.3	344	356	68.2	47.9	209.3	776.9		562.7		1311.7	79.6	305.8	2080.8	153.1		396.7	117.6			66.8	174.1	645.8	115.4		625		284.8	1329.9	303.7													34.485	12.512	28.381	14.954	9.46	16.479	24.414
71	101.9	250.4	122.4	125.9	159.3	181.1		112.9		345.9	51.3	353.6	1571.3	40.9		76.4	192.6			232.3	149.1	41.4	52		318.6		62.2	600.8	566.5													15.869	36.621	14.343	8.85	15.564	15.564	31.433
32.6	98.6	599.1	98.1	950.8	16.3	902.4		237.7		1334.2	201.3	561.8	227	47.1		173	627.3			792.2	337.1	56	805.1		117.3		305.2	579.4	123.8													18.616	25.024	22.583	20.447	18.311	18.616	16.785
37.4	153	204.9	176.7	72.8	498.6	300.1		514.1		142.7	45.3	238.9	135.1	53.8		223.5	154			186.1	240.6	115.7	1733		759.8		130.2	309	23.9													13.428	9.155	13.428	8.85	8.24	11.902	9.155
90.2	267.1	77.6	293.6	205.6	92.8	169.3		606.9		71.5	42.3	310.2	182.7	321.5		166.4	188			186.7	136.3	40.3	136.9		59.7		469.8	567.6	555.4													11.902	15.869	15.259	74.463	14.648	28.992	15.564
21.9	300	97.7	36.3	43.3	197.6	242.3		111.6		670.7	148.9	291.9	405.4	232.1		100.4	75.5			49.5	402.8	125.5	167.4		147.1		34.7	13	52.4													19.226	14.038	11.902	21.667	7.324	25.635	20.447
16	232.7	209.4	45.2	63.4	126.8	270.3		624.8		1027.1	843.8	530.7	190.1	51.1		210.1	764.5			505.7	174.3	125.9	725.7		425.6		891.6	78	39													14.954	44.25	12.207	25.33	13.123	20.447	16.785
179.3	322.9	22.4	37.5	17.1	63.5	608.3		617.6		196.3	299	1201.3	65.6	120.1		918.2	134.4			449	84.1	182.2	318.6		1103.2		585.7	1317.9	121.6													11.292	11.292	32.349	7.935	25.33	23.193	9.46
18.2	330.8	144.8	173.1	458.7	96.7	27.3		142.1		1558	239.8	300.5	917.7	40.7		38.2	224.6			515.1	245.2	115	1370.2		215.7		88.9	1821.9	462.3													12.207	10.681	15.259	14.648	26.855	10.376	12.817
108	305.7	64.3	162.1	16.9	38.2	528.4		77.4		774.1	122.7	273.7	191.9	29.1		144.7	396.3			39.9	411.7	28.4	282.8		272.2		237.8	809.3	117													16.479	13.733	10.681	12.512	14.648	34.18	21.362
19.3	9.5	105.7	180	419.9	28.3	684.2		41.2		81.3	301.1	49.1	1292.2	209.7		1355.5	308			23.7	82.4	102.5	751.3		47.8		130.3	366.9	311.2													17.395	7.629	18.311	8.545	8.24	36.316	32.654
86.6	39	284.4	108.4	18.5	12.6	159.8		274		819.7	252.4	154.7	846.9	47.7		993.4	49.6			352.7	189.3	175.3	1157		26.6		634.3	21.8	1118													13.123	12.207	16.785	19.531	6.714	20.142	14.954
23.9	64.3	19.7	64.2	43.3	18.5	1149.1		622.3		262.8	347.7	1159.9	647.1	44.4		559	583.7			488.9	835.7	23.7	379		867.5		403.2	317.4	240.3													9.766	7.629	9.46	25.94	6.714	9.46	12.512
153.4	168.2	30.9	68.8	98.3	42.4	1204.6		123.7		275.5	63.6	257.6	1522.8	158.9		54.4	132.4			123.6	55.6	40.3	1274.3		93.8		569.9	174.9	394.2													10.376	12.512	10.681	17.395	11.597	23.499	26.245
88.4	274.4	136.7	24.6	35	56.6	282.2		64.9		288.2	37.8	206.4	1.2	235		934.8	436.1			31	53.2	321.5	63.7		182.7		576.7	303.5	46.2													22.888	12.207	14.648	19.531	13.733	12.207	36.621
15.2	340.9	168	36.8	370.5	661	112.1		94.4		638.6	22.3	1263.9	1133.6	32.2		1789.7	69.1			123.3	871.2	391.7	314.7		439.3		173.8	244.6	46.2													9.46	12.207	9.155	16.785	8.85	32.654	11.902
320.5	196.9	12.1	127.8	177.6	41.1	206.7		67		24.4	184.9	227.9	47.5	212.5		555.8	1245.4			303.6	104.6	141.1	664.7		53.8		16.5	878.4	151.9													10.681	12.817	11.597	18.311	11.292	10.071	9.155
32.6	119.4	136.9	511.4	132.8	15.9	63.2		25.6		241.8	66.3	684.9	984.1	31.1		399.3	155.8			563.4	162	83.1	1425.6		46.6		91.4	39.2	643.6													22.278	19.836	25.94	37.842	14.038	17.395	10.071
37.4	24.1	72.6	139	78.5	338.3	507		431.3		378.3	227.7	303.5	393.8	86.7		867	733.9			304.5	277.1	343.5	2157.3		249.9		87.7	641.5	190.8													16.479	8.545	7.629	10.986	9.155	12.207	13.428
38.6	331	222.1	10.2	226.5	98.7	909.6		689.3		504.6	154.8	2261.9	1413.1	73.6		331	101.6			289.4	118	138.1	750.5		419.5		613.6	214.8	65.4													16.479	21.973	16.785	14.648	10.376	12.207	15.869
37.7	375.9	193.2	48.5	153.5	287.7	171.2		114.1		82.1	11.2	998.9	76.6	109.5		1202.5	53.3			282.5	127.6	233.3	119.3		291.2		639.3	2166.9	393.3													9.46	14.343	29.297	12.207	7.324	14.343	10.681
84.9	119.4	149.1	83.2	248	53	703.6		348.9		942.5	305.9	124.3	744.6	46.2		471.2	25.2			679.6	110.7	315.5	1142.4		1378.9		26.5	240.7	44.5													10.986	25.024	11.292	23.193	9.155	12.207	16.785
159	49.9	101.2	42.5	17.1	12.4	425		84.3		53.5	259.3	169.9	54.5	121.5		74.1	908.7			104.9	463.6	240.7	827.2		107.1		194.6	472.8	557.9													21.973	8.85	25.94	17.09	11.292	25.024	29.907
14.4	111.3	41	94.5	170.4	37.9	409.6		186.4		164.9	287.3	65	124.6	225.3		166.8	1170.1			181	149.8	81.8	158.1		193.1		1290.7	118.3	57.2													12.817	12.512	8.545	22.278	11.902	18.616	9.155
140.8	131	88	75.1	71.5	68.4	289.7		91.3		167.2	506.3	516.3	197.6	33.3		239.4	527.6			164.8	510	81.6	300.5		313.3		319	933.8	73.2													17.7	19.531	8.24	17.09	14.038	17.09	25.33
85.5	180.1	29.2	23	681.6	125.5	131.8		20.7		81.5	261.5	233.4	136.1	343.6		620	44.3			678.9	108.9	71.2	802.9		19.6		183.7	601.1	100.8													20.752	9.155	9.766	7.324	15.869	13.123	9.155
111.5	229.5	80	21.5	28.2	134.5	1037.2		239.3		113	111.4	922.8	375	383.4		640.9	87.2			1001	186.2	68.1	1434.1		608.7		125.4	836.3	78.2													15.869	17.395	11.597	32.349	18.311	9.46	17.09
128.5	639.9	323.7	63.1	28.2	409.9	201.6		536.3		96.4	414.2	2205.3	154.1	40.2		105	201.3			170.6	282.1	0.7	828.9		211.4		93.6	17.2	190.4													23.804	16.785	15.259	11.902	9.46	18.921	17.09
438.3	149.8	443.6	85.4	218	168.9	236.5		143.3		1146	328.3	640.9	133.7	166.9		323.9	100			159.7	245.8	89.2	893.3		133.1		1006.5	317.6	136.1													12.512	10.986	18.311	7.629	8.85	21.973	34.485
61.3	1185	557.6	15.6	14.5	399.2	118.2		40		201.7	87.2	97.9	389.3	169.8		67.1	52			409.4	61.6	298	1081.4		334.8		437.5	460.2	171.7													11.597	13.428	13.428	17.09	12.817	25.33	11.292
128.3	203.4	90.4	379.1	55	18.5	374.5		382.4		838.5	134.1	683.6	747.1	78.4		71.7	379			71.6	197.8	56.1	713.6		92.5		588.4	196.6	557.6													9.46	17.09	9.766	7.935	7.629	34.18	10.071
109.6	33.5	451.4	47.2	393.1	11.7	437.3		374.9		634.3	543.4	402.1	532.6	38.2		49.9	44.5			212.4	117.9	137.6	274.6		39.1		72	150.2	186.5													16.479	7.019	14.343	14.343	14.954	22.278	12.207
289.7	263.4	740.2	17.8	21	408.1	130.5		76.1		954.4	25.7	1379.8	517.5	201.9		2111.7	268.1			183.1	264.5	88.1	618.2		100		449.7	310.6	73.3													15.564	8.24	13.428	8.545	7.935	12.817	12.512
76.1	23.1	99.4	376.4	377.5	179.4	791.5		952.5		171.5	297.2	254.9	1059.3	80.2		128	153.2			26.8	544.3	294.5	167.7		15.6		40.7	52	43.8													26.245	7.019	29.297	10.986	23.499	18.616	25.33
99.4	1290.1	111.1	29.9	183.7	93.1	603.7		226.1		158.3	169.7	1437.1	276.4	73.8		94.3	20.7			270.7	213.1	74.8	1901.2		181.2		75.6	840.7	93.8													16.174	30.518	7.629	14.343	10.071	9.766	9.155
31.6	148	46.5	98.2	91.3	14	311.3		33.2		311.6	667.1	79.3	49.8	112		775.9	59.2			507.9	418.3	34	790.7		282.5		459.6	888.7	142													11.597	18.311	13.428	10.071	7.324	27.161	17.09
22.8	1038.6	186.4	300.9	78	38.1	562.3		353.9		320.8	129.3	722.2	898.7	204.8		1650.1	55			297.3	52.9	0	34.8		440.3		400.6	459.1	26.8													10.071	7.935	14.038	10.681	19.531	20.752	9.46
120	374.6	241.9	67.8	435.5	337.6	581.1		236.5		276	100.8	1417.4	445	111.4		122.8	756.9			111.1	319.7	207.9	1322.5		532.8		11.9	58.2	121.4													14.038	12.817	9.46	10.681	20.752	12.512	9.155
177.6	225.6	163.6	529.7	211.8	433.3	113.4		262.7		521.5	220.5	159.2	336.2	95.9		433.2	67.1			43.1	446.8	79.9	620.2		420.9		11.8	184	72.5													10.986	12.817	40.894	15.869	8.85	13.123	10.376
38.6	10.5	84.9	166.8	361.8	368.4	657.9		185.6		545.3	541.4	579.8	448.4	213.2		44.5	532.2			323.6	223.7	79.3	147		956		66.6	261.6	60.8													10.681	7.629	19.226	78.125	9.46	15.259	14.648
48	56.2	21.3	53.7	52.8	146	336.2		48.3		393.2	25.7	58.5	911	84.5		836.7	171			360.3	30.6	87.6	1117.3		542.7		69.9	84.4	34.1													11.902	17.395	12.207	15.564	16.174	33.569	21.667
102.3	11.9	508	117.3	325.8	567.4	323		572.2		161.7	249	365.3	3811	387.2		1081.5	39.5			104.2	288.2	104.7	1020.6		443.1		24.5	52.7	181.1													46.997	21.973	12.512	10.986	7.324	22.583	11.902
160.4	125.4	133.1	33.5	37	22.6	113		181.1		182.5	25.8	199.8	230.5	47.9		363.4	837.4			210.4	383.9	12.6	2320		112.1		32.9	261.3	741.2													19.836	19.531	28.381	25.635	12.817	19.226	17.395
66	33	298.8	102.3	68.6	406.3	1298.4		150.1		1170.6	36.7	293.1	1463.5	149.2		97.3	189			104.3	130	33.2	340		30.3		236.9	456.5	223.8													20.142	8.24	11.597	15.564	14.343	18.005	16.479
129.5	354.6	95.4	459.2	501.8	15.6	9.5		138		150.8	407.2	559.7	376.6	54.1		331.8	44.9			329.5	135.9	122.1	319.8		309.2		1041.2	2203.8	157													17.09	9.766	18.311	18.005	9.155	53.406	14.954
75.5	704.4	59.9	42	480.5	53.5	199.5		38.9		875.1	120	2100.7	377.2	55.3		158.9	102.9			5.6	583.2	719.4	1742.9		121.9		1610.3	847.1	78.6													13.428	12.817	27.466	13.733	20.142	21.973	21.973
40	47.9	173.2	354	341.2	227.4	305.6		79.3		1051.5	87.5	1468	521.9	51		136.7	100.8			283.2	358.6	69	229.2		88.5		29.4	971.7	51.8													15.564	27.771	22.888	16.174	30.212	12.817	21.973
239.8	44	45	62.5	186.4	59.3	88.7		135.3		279.4	139	36.3	265	16.1		60.5	77.5			448.4	121.1	31.7	47.6		772.5		68.5	16.6	457.5													11.292	12.817	13.428	8.24	13.733	38.757	18.921
308.3	202.8	246.9	40	166.2	45.9	161.2		283.9		220	199.7	53.7	1339.5	407.4		390.4	225.3			127.4	152.6	134	625.5		41.7		95.5	451.3	173.1													10.681	9.766	12.512	77.209	30.823	24.414	13.428
29.9	44.6	118.5	45.2	28.7	155.7	267.1		46.3		99.2	184.3	1097	658.2	76.6		279.7	30			62.7	94.1	31.5	873.4		1060.7		909.1	37.2	378.8													21.057	32.959	8.545	15.869	14.038	22.888	26.245
117.7	1159.4	327.3	47	969.4	56.1	59.9		539.7		1001.4	159.8	375.8	493.1	179.2		226.1	489.3			439.8	284.1	374.3	392.1		971.3		806	668.5	43.7													9.766	8.545	8.85	37.231	11.292	31.433	20.752
25.2	32	95.7	61.1	122.3	54.2	829.4		39.7		145.9	85.6	358.7	1290.8	102.6		344.1	38.2			128.6	50.4	46.9	32.1		62.6		373.6	100.9	73.8													13.428	14.343	10.071	14.954	18.616	25.635	9.766
100.3	501.1	328	137.9	433.2	86.1	492.5		15.8		1612.2	301.8	86.4	520.2	94.1		141.5	68.7			498.7	494	447.1	1703.8		127		16.1	159.9	509.3													9.766	8.24	14.648	33.875	36.316	11.902	8.85
169.5	281	430.9	370.3	112	25.1	794.7		49.2		87.9	576.5	432.1	287.3	210.3		403.3	410.2			273.7	82.1	374.4	286.8		48.1		113	136.8	34.8													10.071	11.292	18.921	7.629	39.978	21.362	26.55
167.6	18.3	280.7	22.3	115.9	189	737.6		121.4		696.3	692.8	127.2	416.9	242.3		801.8	82.1			298	44.7	283.1	495.4		95.1		969.4	352.8	125.4													24.109	11.902	12.512	9.46	29.602	21.057	10.681
191.8	285.9	427.6	22.4	304.7	196.3	58.6		66.8		204.9	100.9	1039.3	105.1	58.4		90.1	314.4			73.3	90.3	404.3	91.5		97.9		118.8	1062.5	73.1													11.902	41.809	12.817	25.024	10.071	18.311	10.986
71.4	225.8	36.7	82	621.8	157.2	202.3		523.5		726.3	428.5	836.5	603.7	132		63.4	91.9			76.4	484.2	656.9	140.9		15.6		253.3	129.2	22.7													35.706	7.629	8.545	9.46	47.607	20.752	14.648
31.6	41	94.3	55.8	1.3	54.4	37		231.6		19.8	620.4	2874.8	477.1	127.4		1371.3	312.5			274.3	188.6	149	671		521.7		176.1	1582.8	88.9													13.428	12.512	38.757	14.648	58.899	15.869	22.583
69	712.7	485.4	79.4	141.8	179.4	442.3		101.9		320.1	123.5	2073.8	217.3	111.9		622.8	561.7			1236.8	215.4	145.8	915.3		271.1		295.2	340.9	263													21.667	18.311	8.24	10.376	12.207	14.648	36.316
121	350.6	111.1	141.6	119.2	156.9	598.7		382.6		935.9	960.1	1134.2	582.8	82.5		11.6	994.7			805.4	44.3	38.5	216.3		1101.7		450.9	581.6	325.1													15.564	9.766	7.324	10.071	17.09	15.259	28.076
17.2	591.9	162.9	179.2	63	151.2	253.9		357.6		391	83.9	139.7	532.5	20.6		609.5	197.5			70.7	36.5	288.9	530.7		528.3		285	431.6	246.8													22.888	14.954	7.935	28.076	14.954	20.142	18.921
285.5	27.3	130	207.1	285	79.3	42.6		48.8		257.3	22.6	589.9	928	41.3		483.4	208.5			41.8	227	214.1	275.9		65.1		550.6	102.8	37													18.616	6.409	20.142	7.324	45.471	29.907	13.733
78.2	324.8	466.5	67.8	1	127.6	653		25.1		626	238.1	4253	122.9	51.5		721.7	84.6			142.2	71.7	90.8	1174.6		384.3		234	360.1	104.9													24.414	32.654	17.09	12.817	49.133	35.095	10.986
94.7	25.9	23	181.9	99.7	108.4	97.3		136.4		428.5	389.2	762.2	315.7	154.6		90.9	146.8			191.3	209.2	275.9	438		468.8		197.9	715.6	23.4													19.836	12.512	15.869	21.362	13.733	15.869	9.46
174.9	142.3	78.5	242.6	852.8	228.9	180.9		79		324.5	52	430.3	481.3	245.7		398.9	11.4			137	108.8	30.4	533.3		821.9		191.6	522	44.2													17.09	24.414	15.259	9.155	12.512	19.531	16.174
16.8	309.7	68.2	36	257.8	275.5	434.9		58.9		480.2	39.7	1111.4	190.8	158.1		3894.1	558			78.6	190.2	74	176.8		559.2		14.5	117.2	71													12.817	18.311	12.512	14.648	21.362	15.259	9.766
16.5	23.1	16.2	143.4	202.4	111	324.2		22.2		2080.2	771.4	270.9	540.8	182		1294.8	30.2			214.2	281	303.2	893.3		332.2		522.5	280.2	468.4													27.466	28.992	8.545	51.27	46.082	19.226	15.564
144.6	103.5	67.4	204.8	370	37.6	396		142		508.1	411.9	629.3	497.5	89		184.6	868.4			24.8	68.8	186.3	124.1		184.1		17.8	809.1	233.5													44.861	15.259	13.733	7.935	20.142	12.207	29.297
30.6	268	18	359.3	261	188.9	204.8		140.8		297	413.9		45.4	140		40.3	442			508.5	521.4	82.2	330.6		37		27.7	171.3	30.6													25.024	16.785	7.019	65.613	38.452	9.766	21.057
59.7	979.6	116	40	31.1	23.9	47.1		63.2		295.7	91.9		198.4	14.9		419.5	461.5			572	31.9	36	977.6		94.1		200.9	368.9	100.4													15.259	6.714	14.648	10.681	14.343	22.278	14.343
85	548.9	289	26.9	419.3	110.8	1304.5		200.4		171.3	113.8		209.6	148.7		1128.5	279.3			43.1	77.6	82.9	403.4		1700.9		50	700.5	250.4													10.681	7.019	10.376	16.479	12.817	20.447	19.836
70.4	21.6	131.1	68.2	134.9	83.1	288.5		172.4		864.2	390.6		245.9	80		862.1	49			142.6	253.4	15.6	50.2		81.9		135.2	278.8	404.6													25.635	9.766	11.597	17.7	22.583	15.869	20.447
121.4	726.1	128.5	166.7	30.5	154.9	158.9		33.8		243.6	793.6		130.2	327		717	28.8			23	62.8	46.3	1150.9		249.8		149.8	1038.9	305.8													11.902	7.629	14.648	17.7	7.324	12.207	12.512
94.7	91.8	162	41.1	23.7	64.4	829.7		45.8		248	191.7		242.5	128.8		755.6	81.7			271	61.4	256.9	63.4		145.9		584.9	136	374.6													24.109	42.114	8.545	60.73	20.142	21.362	9.155
45.9	1131.6	77.6	206.3	134.4	20.2	73.3		23.7		293	49.7		165.7	119.5		788	52.4			42.2	299.9	22.6	603.5		825.4		23.6	400.5	213.5													12.207	6.409	32.043	16.785	23.193	38.147	11.597
44.1	551.3	368.5	18.8	135.2	27.5	339.8		35.7		467.7	275		306.8	76.4		63.9	273.9			65.6	241	672.8	1652.2		324.9		372.7	1112.6	246.4													11.597	14.648	9.46	21.973	21.362	50.049	13.123
170.8	676.8	366.8	125.6	884.2	50.4	139.1		828.9		164.1	1394.1		21.3	21.7		836.4	1149.6			18.9	331.5	122.3	1405.4		213.5		513.9	72.8	1091.5													24.414	10.681	18.921	10.071	27.161	35.706	19.226
94	100.5	36.6	56.5	273.5	229.3	1565		395.1		1325.2	107.7		3882.6	37.9		1816.2	334.9			374.8	116.1	133.2	837.3		17		605.5	257.8	87.2													10.071	13.123	21.667	49.744	31.128	20.447	20.752
264.8	385.3	63.7	171.5	100.2	148.9	648.4		934.5		42.9	467.5		77.1	365.7		129.3	318.5			112	175.9	20.7	1466.2		205.8		604.4	566.8	19.6													10.071	8.85	9.46	14.648	9.155	19.226	21.973
215.7	23.2	30.2	36	218.5	87.9	803.1		141.8		716.8	82		251.4	51.8		1019.9	281.7			127.2	94.8	488.6	1269.6		207.4		119.9	307.6	188.5													10.376	14.648	9.766	11.597	7.935	9.46	22.583
33.5	390.6	355.5	917	324.4	127.2	43.9		286.1		464.2	129.3		2366.2	190.3		1265	105.6			319.1	211	66.1	587.9		657.8		153.7	26.7	543.6													15.259	11.902	7.324	23.193	17.395	33.569	10.681
191.9	726.2	111.1	499.4	292.5	472.4	752.2		389.7		737.2	41.7		474.3	60.9		582.7	236.5			33.8	287.2	147.2	1277.1		436.5		227	350.8	31.4													10.681	19.836	15.564	12.817	7.629	17.7	24.109
63.3	248.9	175.6	100.7	379.8	17.6	75		188.3		49	59.9		20.4	92		306	336			822.8	200.6	77.1	49		730.7		96.5	619.7	386.2													15.564	8.545	10.986	10.681	18.616	21.667	10.071
51.8	23.3	404.2	263.3	194.1	224.8	584.5		199.4		974.3	687.7		497.8	51.1		72.1	198.7			101.3	172.4	21.4	501.6		2337		89.7	532.4	984.7													16.785	19.226	17.395	28.076	16.785	30.518	9.766
232.9	27.2	103.4	26.7	133	15.7	516.2		166.2		58.4	147.7		407.9	195.9		191.3	406.1			99	153.5	298.8	1860.1		432.1		292.5	61.1	717.2													17.7	25.33	18.005	16.785	12.207	11.597	9.46
38.6	144.3	39.5	204.9	54.5	150.5	319.9		226.7		35.8	347.8		660.8	51.5		778.1	217			312.6	128.4	355.2	126.7		201.2		212	236.2	237.7													11.902	12.512	9.766	13.123	8.85	10.681	18.005
178.3	514.2	243.8	382.6	129.9	176.5	1001.5		70.4		2033.7	35.2		824	130.9		253.1	417.7			92.9	243.5	88.9	1622.9		271.9		123.2	14.7	140.1													18.311	9.155	32.959	11.292	12.512	15.869	9.766
330	26.5	121.2	172.3	224	34.3	134.4		113.7		444.1	50.1		718.7	30.7		462.1	194.3			207.7	236.5	53.8	1155		389.5		277.2	530.5	132.5													14.648	10.071	10.071	18.311	23.499	34.79	10.071
61.5	439.4	16.9	82	343.3	136.2	131.9		167.8		19.2	236.6		987.4	109.5		118	44.2			235.3	346.8	213.9	708		90.3		462.8	118.9	117.3													11.292	10.376	16.785	46.387	13.733	20.142	15.869
90.2	79	67	209.2	152.1	82.5	731.7		304.4		652.5	367		119.6	319.5		307	836			81.1	67.6	286.1	648.4		206		742.3	386.4	372.9													10.071	7.324	9.766	8.24	10.376	24.719	15.259
45.4	201.6	71.8	14.3	27.4	13.5	836.7		87		252.2	124.1		40.4	227.5		174.1	792.6			110.5	72.3	25.8	338.4		240.7		670.2	2229.1	279.1													10.986	6.714	28.687	13.733	16.785	9.46	10.071
124.5	753.5	59.8	369.8	228.4	187.3	24.5		129.1		28.2	367.3		724.7	79.9		1084.8	92.9			365.8	299.2	176.6	354.9		54.1		427.2	586.5	917.3													13.428	12.512	10.986	15.869	11.597	9.766	18.616
101.4	200.8	29.1	61.7	57.4	30.3	124.5		716.4		463	129.6		256.9	515.5		500.4	441.2			190.4	41.8	41.7	1141		168.6		164	38.4	221.8													12.817	8.24	7.019	18.921	8.24	20.447	12.817
253.4	159.8	239.4	437.2	656.6	43.5	154.8		209.3		110.2	142.1		112.6	192.3		529	333.3			238.8	499.4	399.9	443.2		265.9		192.1	372	123.5													13.733	18.616	18.616	28.076	11.597	13.733	16.785
16.1	65.3	140.4	60.8	148.1	29.2	588.3		127.1		884.3	153.9		77.2	14.3		168.9	275.9			79.2	516.3	22.1	56.8		134.5		581.2	129.9	331.9													14.343	11.292	9.155	19.226	7.629	24.109	21.973
36.2	164.8	287	230.9	53.4	229.9	562.3		393.8		416.5	995.5		192.2	82		135.7	128.4			323.3	229.7	300.6	84.6		1189.8		69.2	193.3	428.9													13.123	9.46	15.259	10.681	14.038	10.986	16.174
34.9	177.1	17.3	315.6	91.1	56.2	140.6		468.8		857.4	95.5		1365.5	99.8		195.4	0			779	153.3	287.3	198.1		1178.3		20.2	763.3	32.5													10.071	6.409	15.869	14.343	7.019	23.193	13.428
103.4	80	306.1	192	102.8	235	39.1		360.4		163.9	414.6		2657.1	86		207.5	107.5			459.2	248.1	36	145		114.3		613.7	349.7	65.9													9.46	24.109	14.648	35.4	18.921	9.766	25.635
179.7	50.8	249.1	46.6	95.8	520.6	29.7		426.6		283.7	48.7			572.1		465.4	148.3			352.3	888.8	249.3	38.1		122.7		172.3	389.9	17.9													14.648	7.324	18.311	12.207	12.207	13.733	18.005
40.1	73.9	227.3	200.2	396.1	32.5	30.1		108.4		62	822			123.1		1265	251.3			624.6	613.2	143.9	1661		590.8		284.6	1061.8	372.4													16.479	9.766	13.733	10.071	16.785	32.349	34.485
119.6	349.9	222	25.9	462.2	100.1	45.6		91.8		760.8	42.3			131.5		49.3	117.1			246.2	749	60.7	69.5		409.4		190.8	660.5	55.7													12.817	7.935	8.85	32.349	7.935	14.038	9.155
220.5	59.1	61.9	16.2	502.7	30.2	177.3		336.7		536.2	38.1			57.6		771.8	287.6			99.1	340.3	394.5	470.3		1653.2		54.4	231.5	98.3													10.376	10.071	11.292	9.766	10.681	9.46	11.902
34.6	0	599.5	405.4	72.3	67.8	1836.8		447.3		831.2	359.4			548.9		30.2	270.1			280	62.3	52.5	66.1		347.8		482	210.3	644.9													9.766	10.071	19.836	25.024	17.09	44.861	11.597
133.9	107.9	61.6	62	552	169.7	395.2		42.5		499.9	829.2			16.3		456.6	711.3			225.9	76.5	172.2	1842.2		271.6		171.4	17.9	64.2													24.109	11.292	16.785	9.46	14.038	11.902	29.907
33.1	250.5	175.2	43.2	178.3	217.2	292.3		830.6		322.7	259.4			23.9		583.9	71.6			584.5	83.2	188	51		249.8		250.3	204.3	531.5													17.7	25.33	10.986	28.381	9.155	25.635	11.902
405.8	224.7	71.7	24	76.2	210.7	526.1		865		174.8	103.9			175.1		492.8	26.4			58.3	70.9	183.8	905.3		420.7		141.3	418.1	97.3													32.349	6.714	32.043	22.583	24.109	10.071	12.512
65.8	90.9	79.4	385.4	449.5	129.6	1022.7		269.8		67.9	543			55.7		85.1	112.6			401.3	124.7	35.1	1947.7		255.5		121.9	481.4	105.2													13.428	53.101	7.935	26.55	25.33	23.193	10.376
183.2	456.8	9.8	231.8	131.7	179.9	778.4		266.9		447.6	78.9			217.7		422.2	266.9			48.1	73.6	246.6	160		250.1		428.2	380.8	197.9													9.766	10.986	17.7	14.954	10.986	9.46	10.071
111.5	233.7	28.3	226.3	744.3	40.8	123.5		263.5		524.4	72.8			47		107.1	118.3			70	55.6	24.5	784.1		16.1		53.5	1054.3	246.8													11.597	25.94	8.545	25.635	18.005	28.687	11.902
100.6	319.9	32.3	77.5	138.2	70.3	52.9		156.1		784.8	130.1			51.4		531.2	338.8			408	70.6	709.7	895.4		375.9		1556.3	110.2	58.3													15.259	7.324	23.804	16.479	10.071	10.986	24.719
45.4	154.1	146.9	230	116.4	40.7	229.3		123.6		348.5	626.6			93.2		245.5	201.5			214.7	571	204.9	363.9		36		105.9	116.4	103.9													14.343	7.629	9.46	18.616	8.85	16.174	8.85
23.2	11.3	437.5	134.5	18	52	659.8		287.2		111.8	62.3			213.5		647.1	236.9			443.2	290.2	439.4	105.5		31.5		70.2	1251.4	14.8													25.33	7.019	16.174	19.226	20.752	45.776	18.616
96	291.6	136.8	24.3	58.6	138.7	87.8		85.4		385.9	631.3			127.8		97.1	200.2			22.1	418.1	369.6	1564.2		126.9		205.7	101.2	101.3													13.123	21.667	18.921	9.155	10.071	26.245	10.681
44.7	819.4	159.2	180.3	282.3	333.8	104.6		629.8		226.2	486			99.5		807.4	21.1			217.4	136.6	301	1621.8		158.5		593.3	146.8	27.7													26.855	10.376	21.362	28.992	10.376	9.155	12.207
199.7	169.9	31.9	23.1	284	18.5	204		124.1		107.1	383.3			226.7		282.5	672.9			372.2	150.3	391.2	551.5		216.3		262.5	151.4	385.8													11.902	11.292	11.902	24.109	15.259	28.992	13.428
22.8	350.9	79.1	209.8	126.1	188.1	113.3		96.8		1079	27.1			132.8		51.3	389.8			70.6	297.6	393	925.8		202.7		1389.4	664	141.2													15.259	9.155	21.057	13.428	16.174	20.447	18.921
29.2	117.1	13	296	32.9	258.8	269.8		119		957.4	13			40.4		324.1	147.4			18	411	83.4	3268.7		109.2		30.7	397	184.9													10.681	13.123	24.414	17.7	7.629	16.174	16.479
19.8	92.4	315.3	38.9	16.8	50.3	164.6		2002.7		943.3	130.9			130		1152.5	119.3			267	121.8	674.2	644.8		157.4		500.7	767.5	241.6													30.212	7.629	10.071	10.071	10.986	15.564	10.986
149	49.7	602.4	279.1	522.6	62.7	92.5		208		102.7	389.1			141.3		145.2	355.4			35.9	426.9	71.8	110.5		121.6		1088.1	671.6	158.5													20.142	30.518	7.935	7.629	9.155	19.836	10.986
5.4	899.1	40.4	40.6	382.8	434.5	114.4		189.7		594.8	193.5			255.8		296.6	33.8			350.9	216.7	218.4	515.3		178.3		170.9	360.5	432.7													18.005	10.986	7.629	10.986	10.071	12.512	8.85
12.2	758.3	179.8	33.1	247.7	32.9	19.3		487.9		847.9	327.4			66.7		1870.9	429.6			12.1	51	39.6	410.3		868.7		530.2	516.5	398.7													12.817	10.986	22.888	24.414	10.376	28.381	11.902
92.2	78.1	77.2	113.7	41.1	206.7	134.3		275.1		97.4	159.4			54		166.3	280.6			188.2	206.4	97	313		33.7		124.6	440.7	361.3													49.133	12.817	16.174	7.935	9.46	14.038	8.85
157.5	826.6	361.7	15.1	69.1	17.9	1015.1		707.9		148.7	264.5			80.9		353.1	238.6			58.6	28	68.6	1005.9		106.8		214.6	913.6	234.4													15.259	12.512	13.733	11.902	8.24	14.038	19.226
161.2	100	56.5	346.7	291.7	141.5	126.3		23.6		159.5	77.2			176.7		221	315.9			186.5	25.7	43.7	721.2		88.9		140.5	150.8	294.1													9.766	7.629	17.395	36.926	12.512	15.869	13.428
138.7	109.8	236.1	153.7	174	34.4	311		155.6		126.4	181.2			65.3		204.1	278.2			22.2	353.3	70.5			506.4		581.3	451.7	105.6													10.986	25.024	16.174	9.46	14.038	29.602	10.376
0.6	156	745.4	265.5	210.8	76.7	919.9		934.2		251.8	374.9			159.8		509.7	28.8			303.2	81.1	1162.2			52.2		342.9	134.1	172.9													14.038	13.428	11.902	77.515	29.907	10.376	20.447
199.4	594.9	242.6	158.8	241.2	54.5	1095.1		245.9		325.3	198.3			79.9		244.5	906.9			185.2	355.1	120.4			82.1		69	1452.7	271.3													11.902	9.766	16.174	14.038	27.161	14.954	22.278
29.4	405.4	27.8	222.7	489.4	414.1	40.3		1638.7		535.6	185.3			412.1		753.9	226.8			120.7	214.1	18.2			111.9		468.7	91.3	183.7													10.986	9.155	22.583	27.771	12.817	19.836	23.499
55.1	294.7	25.3	85.3	71.9	143.7	354.4		335.2		76.3	196.1			27.6		937.9	234.4			1436.9	53.9	176.7			511.7		85.7	1687.9	278.4													11.292	10.071	20.142	8.24	10.071	10.071	17.09
29.7	346	49.6	15.5	172.6	73.5	631.3		341		115.7	20.4			221		199.4	291.4			778.6	382.3	236			340.6		15.9	201.7	49.1													14.343	20.142	11.292	16.479	17.7	9.46	11.902
48.2	276.9	73.6	223	139.8	110.3	664.3		151.4		633.9	497.7			52.8		595.1	160.8			249.6	172.6	235.3			19.8		79.6	101.1	68.5													14.954	10.681	8.85	20.142	22.278	57.983	21.057
52	131.1	209.3	32.7	37.4	29.7	261.5		695.6		1452.8	16.1			98.9		222.8	16.6			210.9	339.3	98.4			200.8		825.3	487.1	20.5													24.109	8.24	13.123	10.071	18.005	12.817	29.907
18	518.4	509.4	232.1	178.1	23.1	738.9		108.3		420	129.9			54.8		737.2	223.5			665.8	462.8	275			1155.9		183.5	741.8	224.2													10.376	21.057	16.174	18.311	20.447	12.207	16.785
56.1	138.2	99.4	214.8	453.9	172	33.7		19.3		48.3	420			242.4		112.5	464.6			18.7	299.9	615.2			370.3		368.1	158.1	267.9													10.376	19.531	12.512	9.766	12.512	17.7	14.038
15.4	303.1	263.2	297.3	157.4	284.4	38.1		205.4		656	496.9			199.3		1348.5	314.5			282.2	538.3	46.3			1553.3		59.2	43.4	63.9													16.785	12.512	12.512	17.09	14.038	22.278	36.926
110.2	315.4	55.6	72.3	87.2	43.3	473.8		198.6		193.6	125			671.6		315.3	569.4			132.7	149.9	87.1			190.8		299		137.9													19.836	9.46	7.935	40.894	13.733	21.057	10.376
25	250.8	130.2	40.9	194.8	357.9	533.2		273		1784.6	180			101		815	443			216.6	276	101.8			151.7		127.8		87.4													9.46	12.817	14.954	20.142	8.24	10.986	9.46
9.3	412.8	25.2	110.1	32.3	106.2	560.3		673.6		153.4	127.7			660.1		655.7	481.9			122.9	285.9	105.8			777		131.2		162.9													36.011	12.207	18.616	11.292	14.954	17.395	9.46
42.9	48.5	226.3	148.5	236	163.4	730.9		309.5		543.6	776			302.8		804.1	274.2			931.8	207.7	411.5			249.7		781.4		242.8													15.564	7.629	18.311	9.46	19.226	18.921	10.071
90.3	33.7	204	141.2	164.9	524.4	53.6		38.7		1076.5	83.4			721.2		193.3	29			452	447.2	592.7			889.1		284.6		297.4													11.597	15.869	16.174	10.986	15.564	14.343	10.071
32	127.5	196.7	384.4	42.6	65.5	61.4		825.6		380.1	379.7			107.4		1128.4	39.1			556.6	335.8	850.5			1021.2		889.6		138.9													11.902	7.629	25.94	8.545	8.545	21.973	12.207
134.3	30.1	168.1	226.9	559.5	105.2	1962.9		71.9		35.7	51			584.1		1828.3	130.6			38.3	340.8	342.8			573.8		175.8		798.9													14.343	20.752	25.33	14.648	16.479	29.297	12.207
59.1	72.2	367.8	38.2	32.8	27.3	91.2		132.1		383.8	25.1			145.4		1497.6	139.6			24	65.6	450.8			44.8		224.1		259.5													21.973	16.479	28.992	9.766	10.986	19.836	9.766
25.4	121.2	169.4	104.2	186.5	190.6	830.2		208.7		529.4	905.7			367.5		627.9	150.1			325.4	214.3	710.9			891.1		233.8		20.8													10.986	8.24	9.766	7.629	17.09	27.771	9.46
284.2	25.7	47.6	108.8	368.5	282.4	286.5		489.1		740.2	161.6			149.2		223	35.5			86.3	148.8	78.3			24.8		388.2		446.5													29.907	18.616	21.057	16.785	7.324	28.381	20.447
129.2	61.3	47.6	13.9	212.6	88.3	126.1		191.5		479.9	103.5			306.4		1633.2	155.6			114.8	245.6	119.7			361.8		1052.3		80.7													17.7	11.292	8.24	12.207	18.616	12.512	12.512
62.5	143.3	62.6	26.6	132.7	162.4	142.2		550.5		310.7	2			238.2		400.5	78.1			234.8	197.4	102			119.8		83.3		14.5													15.259	6.409	11.902	14.648	10.681	12.817	32.043
150.7	193	42.6	18.1	82.2	58.7	92.4		757.1		640.2	620.8			239		550.6	138			50	230.3	175.4			76.7		94.8		547.5													15.564	7.629	20.752	9.46	24.719	21.362	15.564
40.3	104.8	359.4	16.2	128.6	133.4	242.1		291.2		279.8	250.1			35.6		775.3	99.1			269.7	117.6	59.9			73.2		433.2		247.4													13.123	10.071	8.85	21.362	9.766	20.447	18.921
107.3	461.1	269.2	70.7	94.3	171.4	639.7		199.6		388	505.9			128.3		1483.4	81.8			488.4	37.3	691.4			25		18.9		208.1													24.719	18.311	14.038	15.869	7.324	37.231	10.986
21	220	23.8	26.4	35	333.9	471.8		282.2		692.4	397.8			73.8		61.3	78.2			267.4	635.1	47.7			271.8		171.8		79.2													13.733	13.123	9.766	10.681	7.629	10.681	8.85
239.7	71.2	56.3	127.1	44.3	20.3	628.4		842.8		1007.5	61.3			1354.9		414.9	64.3			261.7	558.9	223			33.9		565		16.3													10.071	9.155	16.479	8.545	7.935	13.733	10.986
22.9	134.5	36.7	62.7	126.7	106.9	263.1		247.3		480.2	258.1			517.4		1371.6	101.3			130.8	552.7	1220.6			1286.7		612.4		698.8													10.986	20.142	22.888	30.212	11.902	11.292	10.681
249.2	209.6	116.8	277.9	54.5	84.8	132.6		1411.4		189.2	889.5			373.2		139.6	87.3			210.5	176.7	84.7			370.2		624.1		120.3													10.071	21.667	8.24	23.499	9.155	9.766	10.681
175.6	202.2	269.3	47.6	632.5	62.3	680.9		263.9		896.4	634.4			246.5		1409.5	314.7			897.4	834.2	331.3			508.1		212.8		300.3													10.376	11.597	18.616	7.324	8.24	33.569	10.071
13.7	146.4	144.6	91.4	202.3	11.8	171.2		272		1390.6	441.8			298.9		548.8	115.9			853.8	468.9	191			1299		73.6		142.7													14.648	20.142	9.46	12.207	25.024	37.537	33.264
11.3	461.2	35.8	388.4	537	313.2	311.7		460.9		560.6	34.3			124.2		1171.6	125.8			189.7	36	60.8			310		628.7		348.8													11.292	8.85	12.817	7.935	19.836	9.46	20.752
302.5	326.3	279.5	147.4	361.7	39.4	40.1		366		287	122			46.2		979.2	155.1			399.6	581	119.8			19.5		1324.8		87													19.836	13.428	16.479	14.648	19.531	10.986	11.902
15.8	328.4	75.8	40.6	32.4	406.4	420.1		77		100.6	163.4			84.5		202.4	1142.5			190	167.3	74.5			92.4		654.2		251.9													29.907	8.85	16.785	15.564	23.499	20.447	18.616
19.4	95.6	234.2	88.6	23.1	120.7	53		957.6		74.4	23.1			45.4		576.7	353.5			326.3	122.8	29.5			291.8		205		875.7													12.817	20.752	15.259	20.752	28.076	31.128	35.4
151.9	56.3	166	185.5	135.7	22.2	481.4		52.5		101.1	46.3			1267.5		113.9	252.5			214.6	343.8	35.2			173.2		43.4		28.1													18.311	46.997	14.343	10.681	8.85	10.376	26.55
195.2	648.7	245.6	19.5	290.1	98.2	323.8		1465.2		586.7	614.3			137		163.6	74.3			1289	163.1	315.2			174.5		1152.7		34.1													9.766	16.479	10.986	40.283	46.082	26.55	12.207
47	300.8	403.7	91.1	295	171.3	94.4		203.9		558.4	66.2			12.3		40.5	39.8			61.3	373.2	85.6			350.6		401.3		301.4													14.343	8.24	7.935	19.836	40.894	16.479	8.85
53.8	33.3	87.4	10.5	177.2	8.6	678.2		876.4		55.9	90.3			517.1		532.6	78.9			974.6	68.2	64.7			267.1		450.2		696.5													10.681	11.292	17.7	42.419	10.071	16.785	9.46
50.5	669.8	66.8	84.6	257.6	154.2	165.9		194.9		158.1	95.2			20.3		245.4	579			72.5	181.4	129.8			1143.4		124.4		109.9													10.376	35.706	11.597	17.7	8.24	26.855	10.071
145.1	205.7	54.6	108.9	390.2	47.3	728		52.1		256.5	132			98.1		242.2	17.2			514.1	208.7	799.9			107.6		169.7		411.9													21.667	24.719	10.681	20.447	32.959	16.479	10.681
154.2	20.9	180.8	24.7	275.2	102.4	375.2		288.5		655.2	88.6			148.2		138.1	23.3			694.2	57.5	22.4			159.1		86.4		204.8													15.259	12.512	21.362	16.174	16.479	9.46	35.095
52.3	288.5	30.8	104.3	257.2	91	798.3		526.4		998.5	304.1			373.3		2022.1	149.9			367.8	118.3	510.1			483		40.3		121.2													11.902	10.681	20.142	11.292	12.512	38.757	18.005
48.6	68.3	31.5	66.3	318	101	1904.4		352.1		82.2	121.5			15.1		369.8	26.4			36.7	98.4	423.9			179.1		357.1		109.6													11.902	9.155	13.733	14.038	13.733	26.855	9.766
46.2	775.6	305.9	35.5	327.5	67.5	303.9		214.7		493.6	586.7			67.3		90.4	251.1			594.2	78	334.1			559.1		63.3		104.5													19.836	17.7	17.09	7.935	6.714	17.395	30.212
473	859.9	363.9	108.9	12.9	130.2	330.8		122.5		40.5	427.8			627.6		710.8	526.4			92.3	93.9	205.4			505		814.5		67.4													10.681	14.648	15.564	46.692	19.836	19.226	16.174
38.9	21.9	243.8	1.7	214.9	80.4	709.3		101.2		656.8	433.8			86.4		842	654.3			130.4	290.2	316.9			3219.6		141.6		308.5													10.376	11.902	16.479	49.438	36.011	15.259	20.142
292.3	24.5	63.6	40.7	481.6	100.4	381.5		178.7		152.6	22.6			164.9		197.9	40.1			801.3	813.7	43.8			127		77.5		452.6													15.869	8.545	11.902	10.986	18.311	15.259	21.973
57.4	243	336.9	41.6	800.5	201.1	467.8		217.9		814.7	69.4			568.9		1928	35.5			352.2	77.1	400.5			38		840.9		54.6													18.921	15.564	11.597	15.869	13.428	11.902	11.292
11.4	188.8	413.2	131.6	59.8	13.1	107.5		274.7		340.8	272.7			53.3		264.4	45			455.8	29.8	53.2			104.6		1228.4		468.3													19.531	12.512	11.292	11.292	18.616	27.161	10.376
145.5	1056.8	173.9	30.8	231.4	162.3	333.9		44.9		2406.8	202.7			210.9			80.6			24.8	206.4	796.5			1754.2		263.8		135.3													30.212	9.766	10.986	12.817	9.766	50.659	22.278
296.1	48	45.2	290.7	134.5	310.6	361.3		8.4		982.4	229.7			682.9			144.9			1140.3	54.2	225.6			326.3		30.4		309.6													14.343	15.869	21.057	10.681	10.986	10.986	22.278
266.2	333.1	341.7	37	572.7	280.6	405.3		86		464.6	29.2			236.8			232.1			399	131.1	272.5			391.2		56.4		204.3													10.071	16.479	12.207	10.071	26.855	11.902	21.362
69.7	650	91.1	17.1	121.6	387	433.8		1635.3		164.2	53.9			75			40.4			341.3	122.6	299.3			88.6		664.4		20.8													20.142	8.24	7.629	11.902	13.123	46.387	14.648
[truncated: 1,982 more rows]
[truncated: 25 more columns]

## Sheet: Figure 3F
Number of spikes in CeA-SST neurons against injected current
[truncated: 14 more rows]

[truncated: 2 more sheets: Figure 3G, Figure 3H]
