# Supplementary material for: Cellular mechanisms underlying central sensitization in a mouse model of chronic muscle pain
Source: eLife. 2022 Nov 15;11:e78610. doi: 10.7554/eLife.78610 (PMC9665847; doi:10.7554/eLife.78610)
Supplement: Figure 4—figure supplement 1—source data 1. [file elife-78610-fig4-figsupp1-data1.xlsx]

## Sheet: Figure 4-Figure supplement 1B
The percentage of the colocalized cells			Distribution of colocalized cells along the AP axis
Individual data showing the colocalized percentage of each slice			Individual data showing the colocalized percentage of each slice
SST+mCherry/SST	SST+mCherry/mCherry		AP	SST+mCherry/SST						AP	SST+mCherry/mCherry
0.737	0.754		-1.22	0.609	0.565	0.763	0.756	0.393		-1.22	0.748	0.678	0.935	0.891	0.767
0.788	0.82		-1.34	0.737	0.788	0.95	0.649	0.52		-1.34	0.754	0.82	0.932	0.857	0.719
0.747	0.801		-1.46	0.747	0.644068					-1.46	0.801	0.77551
0.95	0.932		-1.58	0.23	0.648148	0.478				-1.58	0.842	0.68	0.685
0.23	0.842		-1.7	0.645	0.714	0.618				-1.7	0.833	0.833	0.791
0.644068	0.77551
0.648148	0.68
0.609	0.748
0.649	0.857
0.565	0.678
0.645	0.833
0.763	0.935
0.52	0.719
0.714	0.833
0.478	0.685
0.756	0.891
0.618	0.791
0.393	0.767
