# Supplementary material for: Cellular mechanisms underlying central sensitization in a mouse model of chronic muscle pain
Source: eLife. 2022 Nov 15;11:e78610. doi: 10.7554/eLife.78610 (PMC9665847; doi:10.7554/eLife.78610)
Supplement: Figure 4—figure supplement 2—source data 1. [file elife-78610-fig4-figsupp2-data1.xlsx]

## Sheet: Figure 4-Figure supplement 2B
Suppression of CeA-SST neurons increased the withdrawal threshold in MP mice
Individual data showing the PW threshold (g)
hM4Di-ipsi
Days	mouse 1	mouse 2	mouse 3	mouse 4	mouse 5	mouse 6	mouse 7	mouse 8	mouse 9	mouse 10	mouse 11	mouse 12	mouse 13	mouse 14	mouse 15	mouse 16	mouse 17	mouse 18	mouse 19	mouse 20	mouse 21
BL	0.4	0.4	0.4	0.4	0.4	0.4	0.4	0.4	0.4	0.4	0.4	0.4	0.4	0.4	0.4	0.16	0.16	0.4	0.16	0.4	0.4
4hr	0.04	0.04	0.04	0.04	0.04	0.04	0.04	0.04	0.04	0.04	0.04	0.04	0.04	0.04	0.04	0.04	0.04	0.04	0.04	0.04	0.04
1	0.07	0.07	0.07	0.04	0.04	0.04	0.04	0.04	0.04	0.04	0.04	0.04	0.07	0.04	0.04	0.07	0.07	0.07	0.16	0.04	0.04
3	0.16	0.4	0.4	0.16	0.16	0.16	0.4	0.4	0.4	0.4	0.4	0.4	0.16	0.04	0.04	0.4	0.16	0.4	0.4	0.16	0.16
4hr	0.04	0.04	0.04	0.04	0.04	0.04	0.04	0.04	0.04	0.04	0.04	0.04	0.04	0.04	0.04	0.04	0.04	0.04	0.04	0.04	0.04
4	0.04	0.04	0.04	0.04	0.04	0.04	0.04	0.04	0.04	0.04	0.04	0.04	0.04	0.04	0.04	0.04	0.04	0.04	0.04	0.04	0.04
6	0.04	0.04	0.04	0.04	0.04	0.04	0.04	0.04	0.04	0.04	0.04	0.04	0.04	0.04	0.04	0.04	0.04	0.04	0.04	0.04	0.04
10	0.04	0.04	0.04	0.04	0.04	0.04	0.04	0.04	0.04	0.04	0.04	0.04	0.04	0.04	0.04	0.04	0.04	0.04	0.04	0.04	0.04
14	0.04	0.04	0.04	0.04	0.04	0.04	0.04	0.04	0.04	0.04	0.04	0.04	0.04	0.04	0.04	0.04	0.04	0.04	0.07	0.04	0.04
15	0.16	0.4	0.4	0.04	0.16	0.16	0.04	0.16	0.4	0.16	0.4	0.4	0.04	0.04	0.04	0.04	0.04	0.04	0.16	0.4	0.4
16	0.04	0.04	0.04	0.04	0.04	0.04	0.04	0.04	0.04	0.04	0.04	0.04	0.04	0.04	0.04	0.04	0.04	0.04	0.04	0.04	0.04
17	0.07	0.4	0.16	0.07	0.16	0.16	0.16	0.07	0.16	0.16	0.16	0.16	0.4	0.16	0.4	0.16	0.16	0.07	0.4	0.4	0.4
18	0.04	0.04	0.04	0.04	0.04	0.04	0.04	0.04	0.04	0.04	0.04	0.04	0.04	0.04	0.04	0.04	0.04	0.04	0.04	0.04	0.04
21	0.07	0.4	0.16	0.04	0.07	0.07	0.07	0.16	0.16	0.07	0.16	0.16	0.4	0.16	0.4	0.16	0.07	0.04	0.07	0.16	0.16
Days	mouse 22	mouse 23	mouse 24	mouse 25	mouse 26	mouse 27	mouse 28	mouse 29	mouse 30	mouse 31	mouse 32	mouse 33	mouse 34	mouse 35	mouse 36	mouse 37	mouse 38	mouse 39	mouse 40	mouse 41	mouse 42	mouse 43
BL	0.4	0.4	0.4	0.4	0.4	0.4	0.4	0.4	0.4	0.4	0.4	0.16	0.16	0.4	0.4	0.16	0.4	0.4	0.16	0.4	0.4	0.4
4hr	0.04	0.04	0.04	0.04	0.04	0.16	0.04	0.04	0.04	0.04	0.04	0.04	0.04	0.04	0.04	0.04	0.04	0.04	0.04	0.04	0.04	0.04
1	0.04	0.04	0.07	0.04	0.04	0.07	0.07	0.04	0.04	0.04	0.04	0.04	0.04	0.04	0.07	0.04	0.04	0.07	0.07	0.07	0.16	0.04
3	0.16	0.04	0.4	0.4	0.07	0.4	0.4	0.16	0.4	0.4	0.4	0.4	0.4	0.4	0.16	0.04	0.04	0.4	0.16	0.4	0.4	0.16
4hr	0.04	0.04	0.04	0.04	0.04	0.16	0.04	0.04	0.04	0.04	0.04	0.04	0.04	0.04	0.04	0.04	0.04	0.04	0.04	0.04	0.04	0.04
4	0.04	0.04	0.04	0.04	0.04	0.16	0.04	0.04	0.04	0.04	0.04	0.04	0.04	0.04	0.04	0.04	0.04	0.04	0.04	0.04	0.04	0.04
6	0.04	0.04	0.04	0.04	0.04	0.16	0.04	0.04	0.04	0.04	0.04	0.04	0.04	0.04	0.04	0.04	0.04	0.04	0.04	0.04	0.04	0.04
10	0.04	0.04	0.07	0.04	0.04	0.4	0.04	0.04	0.04	0.04	0.04	0.04	0.04	0.04	0.04	0.04	0.04	0.04	0.04	0.04	0.04	0.04
14	0.04	0.04	0.04	0.04	0.04	0.16	0.04	0.04	0.04	0.04	0.04	0.04	0.04	0.04	0.04	0.04	0.04	0.04	0.04	0.04	0.07	0.04
15	0.16	0.16	0.4	0.16	0.16	0.4	0.4	0.16	0.04	0.16	0.4	0.16	0.4	0.4	0.04	0.04	0.04	0.04	0.04	0.04	0.16	0.4
16	0.04	0.04	0.04	0.04	0.04	0.16	0.04	0.04	0.04	0.04	0.04	0.04	0.04	0.04	0.04	0.04	0.04	0.04	0.04	0.04	0.04	0.04
17	0.16	0.04	0.4	0.4	0.16	0.4	0.16	0.16	0.16	0.07	0.16	0.16	0.16	0.16	0.4	0.16	0.4	0.16	0.16	0.07	0.4	0.4
18	0.04	0.04	0.04	0.04	0.04	0.16	0.04	0.04	0.04	0.04	0.04	0.04	0.04	0.04	0.04	0.04	0.04	0.04	0.04	0.04	0.04	0.04
21	0.16	0.16	0.4	0.4	0.16	0.4	0.16	0.07	0.07	0.16	0.16	0.07	0.16	0.16	0.4	0.16	0.4	0.16	0.07	0.04	0.07	0.16
hM4Di-contra
Days	mouse 1	mouse 2	mouse 3	mouse 4	mouse 5	mouse 6	mouse 7	mouse 8	mouse 9	mouse 10	mouse 11	mouse 12	mouse 13	mouse 14	mouse 15	mouse 16	mouse 17	mouse 18	mouse 19	mouse 20	mouse 21
BL	0.4	0.16	0.4	0.4	0.4	0.4	0.4	0.4	0.4	0.4	0.4	0.4	0.4	0.4	0.4	0.16	0.04	0.4	0.4	0.4	0.4
4hr	0.07	0.16	0.4	0.04	0.04	0.16	0.04	0.04	0.04	0.04	0.04	0.04	0.04	0.04	0.04	0.04	0.04	0.04	0.04	0.04	0.04
1	0.07	0.16	0.4	0.07	0.04	0.04	0.04	0.07	0.04	0.04	0.04	0.04	0.07	0.04	0.04	0.07	0.07	0.07	0.16	0.04	0.04
3	0.16	0.16	0.4	0.4	0.4	0.4	0.07	0.4	0.16	0.4	0.16	0.16	0.4	0.04	0.04	0.4	0.16	0.4	0.4	0.16	0.16
4hr	0.04	0.04	0.04	0.04	0.04	0.04	0.04	0.04	0.04	0.04	0.07	0.04	0.04	0.04	0.04	0.04	0.04	0.07	0.04	0.04	0.04
4	0.04	0.04	0.04	0.04	0.04	0.04	0.04	0.04	0.04	0.04	0.04	0.04	0.04	0.04	0.04	0.07	0.07	0.16	0.04	0.04	0.04
6	0.04	0.04	0.04	0.04	0.04	0.04	0.04	0.04	0.04	0.04	0.04	0.04	0.04	0.04	0.04	0.04	0.04	0.07	0.04	0.04	0.04
10	0.04	0.04	0.04	0.04	0.04	0.07	0.04	0.04	0.04	0.04	0.04	0.04	0.04	0.04	0.04	0.04	0.04	0.04	0.04	0.04	0.04
14	0.04	0.04	0.04	0.04	0.04	0.04	0.04	0.07	0.04	0.04	0.04	0.04	0.04	0.04	0.04	0.16	0.04	0.04	0.04	0.04	0.04
15	0.16	0.16	0.4	0.04	0.4	0.16	0.04	0.04	0.16	0.16	0.16	0.16	0.04	0.04	0.16	0.16	0.04	0.04	0.16	0.07	0.16
16	0.04	0.04	0.04	0.04	0.04	0.04	0.04	0.07	0.04	0.04	0.04	0.04	0.04	0.04	0.04	0.04	0.04	0.04	0.04	0.04	0.04
17	0.4	0.16	0.4	0.07	0.4	0.4	0.04	0.16	0.16	0.07	0.07	0.07	0.4	0.07	0.07	0.4	0.04	0.4	0.16	0.07	0.16
18	0.04	0.04	0.04	0.04	0.04	0.04	0.04	0.04	0.04	0.04	0.04	0.04	0.04	0.04	0.04	0.04	0.04	0.04	0.04	0.04	0.04
21	0.4	0.4	0.4	0.07	0.4	0.16	0.04	0.16	0.16	0.04	0.16	0.16	0.4	0.16	0.4	0.16	0.04	0.07	0.07	0.16	0.16
Days	mouse 22	mouse 23	mouse 24	mouse 25	mouse 26	mouse 27	mouse 28	mouse 29	mouse 30	mouse 31	mouse 32	mouse 33	mouse 34	mouse 35	mouse 36	mouse 37	mouse 38	mouse 39	mouse 40	mouse 41	mouse 42	mouse 43
BL	0.4	0.4	0.4	0.4	0.4	0.4	0.4	0.07	0.4	0.16	0.4	0.4	0.4	0.4	0.07	0.07	0.16	0.04	0.4	0.4	0.4	0.4
4hr	0.04	0.07	0.16	0.04	0.04	0.16	0.04	0.04	0.04	0.04	0.04	0.04	0.04	0.04	0.04	0.04	0.04	0.04	0.04	0.04	0.04	0.04
1	0.04	0.16	0.16	0.04	0.04	0.07	0.07	0.04	0.07	0.04	0.04	0.04	0.04	0.07	0.04	0.04	0.07	0.07	0.07	0.16	0.04	0.04
3	0.16	0.07	0.4	0.4	0.07	0.4	0.4	0.07	0.4	0.16	0.4	0.16	0.16	0.4	0.04	0.04	0.4	0.16	0.4	0.4	0.16	0.16
4hr	0.04	0.07	0.07	0.04	0.04	0.07	0.04	0.04	0.04	0.04	0.04	0.07	0.04	0.04	0.04	0.04	0.04	0.04	0.07	0.04	0.04	0.04
4	0.04	0.04	0.07	0.04	0.04	0.16	0.04	0.04	0.04	0.04	0.04	0.04	0.04	0.04	0.04	0.04	0.07	0.07	0.16	0.04	0.04	0.04
6	0.04	0.04	0.07	0.04	0.04	0.16	0.04	0.04	0.04	0.04	0.04	0.04	0.04	0.04	0.04	0.04	0.04	0.04	0.07	0.04	0.04	0.04
10	0.04	0.04	0.07	0.04	0.04	0.07	0.04	0.04	0.04	0.04	0.04	0.04	0.04	0.04	0.04	0.04	0.04	0.04	0.04	0.04	0.04	0.04
14	0.04	0.04	0.16	0.04	0.04	0.04	0.04	0.04	0.07	0.04	0.04	0.04	0.04	0.04	0.04	0.04	0.16	0.04	0.04	0.04	0.04	0.04
15	0.16	0.16	0.16	0.16	0.16	0.4	0.16	0.04	0.04	0.16	0.16	0.16	0.16	0.04	0.04	0.07	0.16	0.04	0.04	0.16	0.07	0.16
16	0.04	0.07	0.07	0.04	0.04	0.07	0.04	0.04	0.07	0.04	0.04	0.04	0.04	0.04	0.04	0.04	0.04	0.04	0.04	0.04	0.04	0.04
17	0.16	0.16	0.16	0.4	0.07	0.4	0.4	0.04	0.16	0.16	0.07	0.07	0.07	0.4	0.07	0.07	0.4	0.04	0.4	0.16	0.07	0.16
18	0.04	0.07	0.07	0.04	0.04	0.16	0.04	0.04	0.04	0.04	0.04	0.04	0.04	0.04	0.04	0.04	0.04	0.04	0.04	0.04	0.04	0.04
21	0.4	0.16	0.16	0.4	0.16	0.4	0.16	0.04	0.16	0.16	0.04	0.16	0.16	0.4	0.16	0.4	0.16	0.04	0.07	0.07	0.16	0.16
