# Supplementary material for: Cellular mechanisms underlying central sensitization in a mouse model of chronic muscle pain
Source: eLife. 2022 Nov 15;11:e78610. doi: 10.7554/eLife.78610 (PMC9665847; doi:10.7554/eLife.78610)
Supplement: Figure 4—figure supplement 3—source data 1. [file elife-78610-fig4-figsupp3-data1.xlsx]

## Sheet: Figure 4-Figure Supplement 3B
The effects of CNO treatment on PW threshold in Ctrl mice
Individual data showing the PW threshold (g)
mCherry-ipsi												hM4Di-ipsi
Days	mouse 1	mouse 2	mouse 3	mouse 4	mouse 5	mouse 6	mouse 7	mouse 8	mouse 9	mouse 10		Days	mouse 1	mouse 2	mouse 3	mouse 4	mouse 5	mouse 6	mouse 7	mouse 8	mouse 9	mouse 10	mouse 11	mouse 12	mouse 13	mouse 14	mouse 15
BL	0.4	0.4	0.4	0.4	0.4	0.4	0.4	0.4	0.4	0.4		BL	0.4	0.4	0.4	0.4	0.4	0.4	0.4	0.4	0.4	0.4	0.4	0.4	0.4	0.4	0.4
4hr	0.4	0.4	0.4	0.4	0.4	0.4	0.16	0.16	0.4	0.4		4hr	0.16	0.4	0.16	0.07	0.04	0.4	0.4	0.4	0.4	0.16	0.16	0.07	0.4	0.4	0.4
1	0.4	0.4	0.4	0.4	0.4	0.4	0.16	0.4	0.4	0.4		1	0.4	0.4	0.4	0.4	0.16	0.4	0.4	0.4	0.4	0.4	0.4	0.4	0.4	0.4	0.04
3	0.4	0.4	0.4	0.4	0.4	0.4	0.4	0.4	0.4	0.4		3	0.4	0.4	0.4	0.4	0.4	0.4	0.4	0.4	0.16	0.4	0.4	0.4	0.4	0.4	0.4
4hr	0.4	0.4	0.4	0.4	0.4	0.4	0.4	0.4	0.4	0.4		4hr	0.16	0.4	0.4	0.4	0.16	0.4	0.4	0.4	0.4	0.4	0.4	0.16	0.16	0.4	0.16
4	0.4	0.4	0.4	0.4	0.4	0.4	0.4	0.4	0.4	0.4		4	0.4	0.4	0.4	0.4	0.16	0.4	0.4	0.4	0.4	0.4	0.4	0.16	0.4	0.4	0.16
6	0.4	0.4	0.4	0.07	0.4	0.4	0.4	0.4	0.4	0.4		6	0.4	0.4	0.4	0.4	0.16	0.4	0.4	0.4	0.4	0.4	0.4	0.16	0.4	0.4	0.4
10	0.4	0.4	0.4	0.4	0.4	0.4	0.4	0.4	0.4	0.4		10	0.4	0.4	0.4	0.4	0.4	0.4	0.4	0.4	0.4	0.4	0.4	0.4	0.4	0.4	0.4
14	0.4	0.4	0.4	0.4	0.4	0.4	0.4	0.4	0.4	0.4		14	0.4	0.4	0.4	0.4	0.16	0.4	0.4	0.4	0.4	0.4	0.16	0.16	0.16	0.16	0.4
15	0.4	0.4	0.4	0.4	0.4	0.4	0.4	0.4	0.4	0.4		15	0.4	0.4	0.4	0.4	0.4	0.4	0.4	0.4	0.4	0.4	0.4	0.4	0.4	0.4	0.4
mCherry-contra												hM4Di-contra
Days	mouse 1	mouse 2	mouse 3	mouse 4	mouse 5	mouse 6	mouse 7	mouse 8	mouse 9	mouse 10		Days	mouse 1	mouse 2	mouse 3	mouse 4	mouse 5	mouse 6	mouse 7	mouse 8	mouse 9	mouse 10	mouse 11	mouse 12	mouse 13	mouse 14	mouse 15
BL	0.4	0.4	0.4	0.4	0.4	0.4	0.4	0.4	0.4	0.4		BL	0.4	0.4	0.4	0.4	0.4	0.4	0.4	0.4	0.4	0.4	0.4	0.4	0.4	0.16	0.4
4hr	0.4	0.4	0.4	0.4	0.4	0.4	0.4	0.4	0.4	0.4		4hr	0.4	0.4	0.4	0.4	0.16	0.04	0.4	0.4	0.4	0.07	0.4	0.4	0.4	0.4	0.4
1	0.4	0.4	0.4	0.4	0.16	0.4	0.4	0.4	0.4	0.4		1	0.4	0.4	0.4	0.4	0.4	0.16	0.16	0.4	0.4	0.16	0.4	0.4	0.16	0.4	0.4
3	0.4	0.4	0.4	0.4	0.4	0.4	0.4	0.4	0.4	0.4		3	0.4	0.16	0.4	0.6	0.4	0.16	0.4	0.4	0.4	0.16	0.4	0.4	0.4	0.4	0.07
4hr	0.4	0.4	0.4	0.4	0.4	0.4	0.4	0.4	0.4	0.4		4hr	0.4	0.16	0.4	0.6	0.4	0.16	0.16	0.4	0.4	0.16	0.4	0.4	0.4	0.4	0.4
4	0.4	0.4	0.4	0.4	0.4	0.4	0.4	0.4	0.4	0.4		4	0.4	0.4	0.4	0.4	0.4	0.4	0.4	0.4	0.4	0.16	0.4	0.4	0.4	0.4	0.16
6	0.4	0.4	0.4	0.4	0.4	0.4	0.4	0.4	0.4	0.4		6	0.4	0.16	0.4	0.4	0.4	0.4	0.4	0.4	0.4	0.16	0.4	0.4	0.4	0.4	0.4
10	0.4	0.4	0.4	0.4	0.4	0.4	0.4	0.4	0.4	0.4		10	0.4	0.16	0.4	0.4	0.4	0.16	0.4	0.4	0.4	0.16	0.4	0.4	0.4	0.4	0.4
14	0.4	0.4	0.4	0.4	0.4	0.4	0.4	0.4	0.4	0.4		14	0.4	0.4	0.07	0.4	0.4	0.4	0.04	0.4	0.4	0.07	0.4	0.4	0.16	0.4	0.4
15	0.4	0.4	0.4	0.16	0.4	0.4	0.4	0.16	0.4	0.4		15	0.4	0.16	0.4	0.4	0.4	0.16	0.16	0.4	0.4	0.16	0.4	0.16	0.4	0.4	0.4

## Sheet: Figure 4-Figure Supplement 3C
The effects of CNO treatment on open-arm time and total distance
Individual data showing the open-arm time (%) of each mouse
mouse	mCherry		mouse	hM4Di
1	21.3376		1	24.67
2	17.4615		2	17.23
3	24.5463		3	14.34
4	4.10365		4	19.46
5	24.6		5	16.84
6	35.6817		6	25.1
			7	18.93
			8	17.1767
			9	18.2217
			10	18.75
			11	16.9039
			12	15.2413
			13	25.3225
			14	24.672
Individual data showing the total distance (m) of each mouse
mouse	mCherry		mouse	hM4Di
1	22.9678		1	19.2447
2	22.4673		2	16.316
3	18.9829		3	19.0785
4	17.9285		4	20.7734
5	27.8988		5	22.1119
6	13.6635		6	25.9689
			7	18.0558
			8	17.1204
			9	18.198
			10	25.1349
			11	21.1936
			12	18.1033
			13	17.4476
			14	22.3795

## Sheet: Figure 4-Figure Supplement 3D
The effects of CNO treatment on the number of transitions and total distance in Ctrl mice
Individual data showing the number of transitions of each mouse
	mouse	mCherry		mouse	hM4Di
	1	22		1	34
	2	35		2	30
	3	24		3	38
	4	26		4	30
				5	30
				6	34
				7	18
				8	36
Individual data showing the total distance (m) of each mouse
	mouse	mCherry		mouse	hM4Di
	1	18.506		1	22.238
	2	22.566		2	23.466
	3	17.057		3	8.15
	4	16.53		4	25.428
				5	29.431
				6	22.876
				7	21.599
				8	30.542

## Sheet: Figure 4-Figure Supplement 3E
The effects of CNO treatment on the number of buried marbles in Ctrl mice
Individual data showing the number of buried marbles of each mouse
	mouse	mCherry		mouse	hM4Di
	1	13		1	4
	2	10		2	4
	3	6		3	3
	4	7		4	7
				5	9
				6	6
				7	4
				8	7

## Sheet: Figure 4-Figure Supplement 3F
The effects of CNO treatment on the relative time of immobility in Ctrl mice
Individual data showing the relative time of immobility (%) of each mouse
	mouse	mCherry		mouse	hM4Di
	1	63.5159		1	55.28
	2	47.8547		2	51.89
	3	55.0644		3	54
	4	44.8707		4	47.38
	5	55.7594		5	53.83
	6	60.189		6	45.4489
	7	65.5824		7	48.4603
				8	53.1972
				9	33.1547

## Sheet: Figure 4-Figure Supplement 3G
The effects of CNO treatment on the social-zone time in Ctrl mice
Individual data showing the social-zone time (%) of each mouse
mouse	mCherry		mouse	hM4Di
1	51.6593		1	53.72
2	41.1357		2	57.7225
3	63.4271		3	48.32
4	79.0675		4	46.53
5	46.2323		5	53.1492
6	57.9899		6	40.5112
			7	54.0215
			8	30.9628
			9	45.7232
			10	56.2844
			11	63.2293
			12	74.2207
			13	52.1818
Individual data showing the total distance (m) of each mouse
mouse	mCherry		mouse	hM4Di
1	17.713		1	33.0336
2	15.4302		2	27.0104
3	15.1511		3	28.6645
4	14.5084		4	24.7205
5	22.1866		5	20.4933
6	31.9783		6	20.3801
			7	25.4723
			8	13.8116
			9	12.1174
			10	19.7405
			11	21.5806
			12	12.1752
			13	18.2877
