# Supplementary material for: Cellular mechanisms underlying central sensitization in a mouse model of chronic muscle pain
Source: eLife. 2022 Nov 15;11:e78610. doi: 10.7554/eLife.78610 (PMC9665847; doi:10.7554/eLife.78610)
Supplement: Figure 4—figure supplement 4—source data 1. [file elife-78610-fig4-figsupp4-data1.xlsx]

## Sheet: Figure 4-Figure Supplement 4B
The percentage of the colocalized cells			Distribution of colocalized cells along the AP axis
Individual data showing the colocalized percentage of each slice			Individual data showing the colocalized percentage of each slice
PKC+mCherry/PKC	PKC+mCherry/mCherry		AP	PKC+mCherry/PKC						AP	PKC+mCherry/mCherry
0.241	0.568		-1.22	0.361	0.394958	0.328	0.397	0.372	0.182	-1.22	0.512	0.5875	0.633	0.455	0.593	0.727
0.428	0.602		-1.34	0.241	0.217	0.344	0.302	0.435		-1.34	0.568	0.565	0.6	0.559	0.833
0.541	0.82		-1.46	0.269	0.317	0.398				-1.46	0.657	0.65	0.62
0.361	0.512		-1.58	0.541	0.304348	0.274	0.41	0.257		-1.58	0.82	0.7	0.537	0.743	0.662
0.269	0.657		-1.7	0.428	0.391					-1.7	0.602	0.551
0.394958	0.5875
0.304348	0.7
0.217	0.565
0.328	0.633
0.397	0.455
0.274	0.537
0.317	0.65
0.372	0.593
0.182	0.727
0.344	0.6
0.302	0.559
0.41	0.743
0.257	0.662
0.435	0.833
0.391	0.551
0.398	0.62

## Sheet: Figure 4-Figure Supplement 4C
Normalized firing frequency in both hM3Dq(+) and hM3Dq(-) neurons
Individual data showing the normalized firing frequency of each cell
hM3Dq(+)								hM3Dq(-)
Time (s)	cell 1	cell 2	cell 3	cell 4	cell 5	cell 6		Time (s)	cell 1	cell 2	cell 3	cell 4	cell 5
0	0.933336	0.813953	0.999999	1.14286	1.4	0		0	0.511361	0.684411	0.998403	2.14285	0.508474
30	1.2	0.813953	0.928571	1.42857	1.8	0		30	0.511361	1.10266	0.990415	1.60714	0
60	1.13334	1.16279	0.999999	1.14286	1.2	0		60	0	0.836499	1.10224	1.25	0.677965
90	0.733336	1.24031	1.14286	1.42857	0.399999	0.121951		90	0.511361	0.836499	0.982428	1.42857	0.338982
120	0.800002	1.12403	0.857142	0.285714	1.2	0		120	0	1.21673	0.982428	1.07143	1.35593
150	0.866662	1.12403	0.999999	1.14286	1.6	0.487805		150	0.511361	1.14068	1.01438	0.535713	1.18644
180	1.06666	1.08527	1.21429	0.857143	0.399999	1.70732		180	1.13636	0.988594	0.958466	0.178571	1.35593
210	1	1.00775	0.999999	1.14286	0.599999	3.04878		210	3.40907	1.21673	0.990415	0.714284	1.8644
240	0.866662	0.813953	1.07143	0.285714	0.599999	3.41464		240	2.27271	0.874526	1.02236	0.535713	1.18644
270	1.4	0.813953	0.785714	1.14286	0.799998	1.21951		270	1.13636	1.10266	0.958466	0.535713	1.52542
300	1.2	0.930233	1.14286	0.571429	0.399999	2.19512		300	2.27271	1.40684	1.00639	1.07143	1.8644
330	1.06666	1.00775	1.07143	1.14286	1.4	2.31708		330	3.97725	0.988594	0.910543	0.535713	1.69491
360	1.2	0.968992	1.28571	1.71429	1.8	2.07317		360	1.13636	1.29277	0.926518	0.535713	2.03389
390	1.46666	1.08527	1.5	1.71429	2.4	3.41464		390	0	1.21673	1.01438	0.178571	1.52542
420	2.86667	1.20155	1.07143	13.4286	1.2	12.6829		420	0	1.36882	1.00639	0.714284	2.54237
450	2.86667	1.24031	1.42857	13.1429	3.19999	17.8049		450	0	0.988594	1.04633	0.714284	1.35593
480	3.20001	1.27907	0.928571	10.8571	2.4	17.8049		480	0.511361	0.988594	0.974441	0.178571	1.01695
510	3.53334	1.62791	0.999999	8.28571	2.59999	25		510	1.70454	1.02662	1.01438	0.535713	1.01695
540	3.20001	1.47287	0.928571	9.42857	2.2	27.9269		540	0	1.17871	1.00639	0.178571	1.01695
570	3.26667	1.27907	0.999999	9.71429	3.39999	33.6586		570	3.40907	1.10266	0.86262	0.535713	0
600	3.60001	1.62791	1.14286	10.8571	3.39999	29.8781		600	2.27271	1.06464	0.926518	0.357142	0.338982

## Sheet: Figure 4-Figure Supplement 4D
The effects of CNO on PW threshold in hM3Dq-MP mice
Individual data showing the PW threshold (g)
mCherry-ipsi							hM3Dq-ipsi
Days	mouse 1	mouse 2	mouse 3	mouse 4	mouse 5		Days	mouse 1	mouse 2	mouse 3	mouse 4	mouse 5	mouse 6	mouse 7	mouse 8	mouse 9	mouse 10	mouse 11	mouse 12	mouse 13
BL	0.6	1	0.6	0.6	0.6		BL	1	1	0.6	0.6	0.6	1	1	1	1	0.6	1	1	0.6
4hr	0.16	0.6	0.07	0.04	0.07		4hr	0.16	0.16	0.04	0.16	0.07	0.4	0.4	0.04	0.07	0.07	0.16	0.07	0.07
1	0.6	0.6	0.16	0.4	0.4		1	0.6	0.6	0.4	0.4	0.4	0.6	0.4	0.16	0.4	0.07	0.07	0.16	0.07
3	1	0.6	0.6	0.4	0.6		3	0.6	0.6	0.6	0.6	0.6	1	0.6	0.4	0.4	0.16	0.4	0.4	0.16
4hr	0.16	0.07	0.16	0.04	0.4		4hr	0.07	0.07	0.04	0.04	0.04	0.4	0.16	0.07	0.04	0.07	0.07	0.04	0.07
4	0.16	0.07	0.07	0.16	0.07		4	0.6	0.04	0.04	0.04	0.07	0.16	0.07	0.04	0.04	0.04	0.04	0.04	0.04
6	0.4	0.04	0.07	0.07	0.07		6	0.6	0.07	0.04	0.04	0.04	0.16	0.16	0.07	0.04	0.07	0.04	0.07	0.07
10	0.16	0.16	0.16	0.04	0.16		10	0.16	0.04	0.04	0.16	0.04	0.16	0.4	0.07	0.04	0.07	0.07	0.04	0.07
14	0.4	0.04	0.16	0.07	0.16		14	0.4	0.04	0.07	0.07	0.07	0.04	0.07	0.04	0.07	0.07	0.04	0.04	0.04
15	0.4	0.16	0.07	0.16	0.07		15	1	1	0.6	0.6	0.4	0.6	1	0.4	0.6	0.6	0.6	0.6	0.6
mCherry-contra							hM3Dq-contra
Days	mouse 1	mouse 2	mouse 3	mouse 4	mouse 5		Days	mouse 1	mouse 2	mouse 3	mouse 4	mouse 5	mouse 6	mouse 7	mouse 8	mouse 9	mouse 10	mouse 11	mouse 12	mouse 13
BL	1	0.6	0.4	1	0.6		BL	1	0.6	0.6	0.6	0.6	0.6	1	1	1	0.6	1	0.6	0.6
4hr	0.16	0.04	0.04	0.16	0.04		4hr	0.6	0.07	0.07	0.16	0.04	0.16	0.4	0.04	0.04	0.07	0.4	0.04	0.04
1	0.6	0.4	0.6	0.6	0.6		1	0.6	0.6	0.4	0.4	0.4	0.4	0.6	0.16	0.07	0.07	0.6	0.07	0.4
3	0.6	0.6	0.16	0.6	0.16		3	1	0.4	0.4	0.6	0.6	0.6	0.6	0.4	0.4	0.4	1	1	0.6
4hr	0.07	0.07	0.16	0.16	0.16		4hr	0.6	0.07	0.07	0.04	0.16	0.04	0.07	0.04	0.07	0.16	0.16	0.16	0.16
4	0.16	0.16	0.16	0.4	0.16		4	0.6	0.16	0.4	0.04	0.07	0.04	0.04	0.07	0.04	0.16	0.07	0.04	0.07
6	0.16	0.07	0.04	0.4	0.04		6	0.6	0.07	0.07	0.04	0.07	0.04	0.07	0.04	0.04	0.07	0.07	0.07	0.07
10	0.4	0.07	0.04	0.16	0.04		10	0.6	0.04	0.07	0.16	0.04	0.16	0.04	0.04	0.04	0.16	0.16	0.07	0.04
14	0.16	0.07	0.04	0.4	0.04		14	1	0.04	0.04	0.07	0.07	0.07	0.07	0.04	0.04	0.16	0.07	0.04	0.04
15	0.16	0.07	0.07	0.4	0.04		15	1	0.6	0.6	0.6	0.4	0.6	1	0.4	0.4	0.6	1	0.6	0.6

## Sheet: Figure 4-Figure Supplement 4E
The effects of CNO treatment on open-arm time and total distance
Individual data showing the open-arm time (%) of each mouse
mouse	mCherry		mouse	hM3Dq
1	30.0378		1	18.6979
2	25.984		2	31.962
3	27.298		3	6.51282
4	8.54648		4	17.7972
5	13.6518		5	3.34685
6	10.267		6	13.7885
7	4.447		7	11.7889
			8	3.98154
			9	15.2765
			10	15.959
			11	6.21664
			12	23.4054
			13	12.41
Individual data showing the total distance (m) of each mouse
mouse	mCherry		mouse	hM3Dq
1	16.4989		1	24.2688
2	18.5954		2	19.4906
3	22.4751		3	17.6889
4	23.4511		4	22.318
5	20.6408		5	15.285
6	18.816		6	21.7779
7	10.8126		7	18.6462
			8	12.3946
			9	21.3584
			10	29.6669
			11	15.059
			12	24.3265
			13	20.6314

## Sheet: Figure 4-Figure Supplement 4F
The effects of CNO treatment on the number of transitions and total distance
Individual data showing the number of transitions of each mouse
mouse	mCherry		mouse	hM3Dq
1	17		1	19
2	30		2	4
3	29		3	35
4	33		4	39
5	38		5	44
6	28		6	58
7	38		7	29
8	10		8	54
9	40		9	40
10	34		10	48
11	15		11	46
12	28		12	29
Individual data showing the total distance (m) of each mouse
mouse	mCherry		mouse	hM3Dq
1	14.105		1	8.501
2	16.769		2	23.256
3	20.039		3	23.483
4	17.573		4	11.519
5	23.471		5	10.401
6	19.446		6	15.647
7	20.418		7	8.354
8	12.601		8	11.752
9	21.417		9	12.036
10	16.786		10	12.542
11	2.539		11	12.703
12	7.148		12	18.802

## Sheet: Figure 4-Figure Supplement 4G
The effects of CNO treatment on the number of buried marbles
Individual data showing the number of buried marbles of each mouse
mouse	mCherry		mouse	hM3Dq
1	11		1	16
2	12		2	10
3	20		3	17
4	18		4	4
5	12		5	18
6	16		6	10
7	18		7	15
8	18		8	21
9	17		9	15
10	16		10	19
11	15		11	19
12	16		12	17
			13	19
			14	21
			15	20

## Sheet: Figure 4-Figure Supplement 4H
The effects of CNO treatment on the relative time of immobility
Individual data showing the relative time of immobility (%) of each mouse
mouse	mCherry		mouse	hM3Dq
1	0.5944		1	0.6694
2	0.3333		2	0.55
3	0.5944		3	0.7139
4	0.5556		4	0.538889
5	0.538889		5	0.777778
6	0.494444		6	0.711111
7	0.519444		7	0.4722
8	0.613889
9	0.505556
10	0.408333

## Sheet: Figure 4-Figure Supplement 4I
The effects of CNO treatment on the social-zone time and total distance
Individual data showing the social-zone time (%) of each mouse
mouse	mCherry		mouse	hM3Dq
1	27.74		1	38.09
2	33.026		2	63.97
3	41.0552		3	40.31
4	46.7825		4	42.69
5	37.1561		5	38.99
6	33.0426		6	39.49
7	33.688		7	42.09
			8	38.23
			9	33.09
			10	38.88
Individual data showing the total distance (m) of each mouse
mouse	mCherry		mouse	hM3Dq
1	27.9952		1	21.0066
2	23.712		2	18.6468
3	25.1607		3	24.195
4	25.5225		4	17.4404
5	26.4474		5	20.9492
6	30.3315		6	23.5796
7	22.8543		7	24.0655
			8	38.7168
			9	44.3946
			10	40.371
