# Supplementary material for: Cellular mechanisms underlying central sensitization in a mouse model of chronic muscle pain
Source: eLife. 2022 Nov 15;11:e78610. doi: 10.7554/eLife.78610 (PMC9665847; doi:10.7554/eLife.78610)
Supplement: Figure 4—source data 1. [file elife-78610-fig4-data1.xlsx]

## Sheet: Figure 4C
Normalized firing frequency in both hM4Di(+) and hM4Di(-) neurons
Individual data showing the normalized firing frequency of each cell
hM4Di(+)
Time (s)	cell 1	cell 2	cell 3	cell 4	cell 5	cell 6	cell 7	cell 8	cell 9	cell 10
0	0.555556	1.01064	0.84507	0.578457	1.02823	0.756173	0.927419	0.826087	0.697279	0.676923
30	0.384615	1.01064	0.809859	0.625	1.00806	0.679012	0.927419	1.13044	1.10544	0.815385
60	0.769231	1.21676	1.37324	0.771277	0.725807	0.817901	0.645161	1.17391	1.29252	0.846154
90	0.641026	1.10372	1.12676	0.890957	0.584677	0.848765	0.645161	1.1087	0.969388	0.876923
120	1.11111	1.04388	0.84507	0.924202	0.100806	0.87963	1.73387	0.76087	0.935374	0.830769
150	0.940171	0.990691	0.68662	0.957447	0.262097	0.833333	1.85484	0.869565	0.969388	0.815385
180	1.53846	0.837766	1.19718	1.06383	0.504032	0.817901	1.25	0.891304	1.17347	1.38461
210	1.66667	1.02394	0.809859	1.01064	0.604839	1.38889	0.524193	0.652174	1.68367	0.938461
240	1.41026	0.724734	1.12676	0.957447	1.10887	0.941358	2.8629	0.434783	1.36054	1.01538
270	2.17949	0.571809	0.84507	1.01064	1.06855	1.01852	1.93548	0.391304	0.79932	0.846154
300	2.17949	0.239362	1.25	0.784574	1.25	0.848765	0.766129	0.521739	0	0.553846
330	0.34188	0.259308	0.352113	0.0465426	0.967742	0.555556	0.887097	0.434783	0	0.507692
360	0	0.398936	0	0	0.544355	0.509259	0	0	0	0.384615
390	0	0.3125	0	0.0132979	0	0.231482	0	0	0	0.138461
420	0	0.378989	0	0	0	0.138889	0	0	0	0.0923077
450	0.25641	0.3125	0	0.0265958	0	0.0925926	0	0	0	0
480	0	0	0	0.0332447	0	0	0	0	0	0
510	0	0	0	0.0398936	0	0	0	0	0	0
540	0	0	0	0.0199468	0	0	0	0	0	0
570	0	0	0	0.0265958	0	0	0	0	0	0
600	0	0	0	0.0398936	0	0	0	0	0	0
hM4Di(-)
Time (s)	cell 1	cell 2	cell 3	cell 4	cell 5	cell 6	cell 7	cell 8	cell 9	cell 10
0	0.38806	0.548926	0.7	1.59836	0.706806	0.87156	0.854167	0.782313	1.37931	0.364583
30	0.477612	0.620525	0.74	1.43443	0.759162	1.19266	0.9375	0.748299	1.33621	0.3125
60	0.597015	0.668258	0.7	1.31147	0.837697	1.19266	1.16667	0.748299	1.12069	0.208333
90	0.641791	0.75179	0.74	1.18853	0.916233	1.65138	1.10417	1.39456	1.2069	0.338542
120	0.880597	0.775656	0.86	1.31147	0.890052	1.23853	0.9375	1.32653	1.16379	0.286458
150	0.970149	0.680191	0.92	0.860656	1.06021	0.550459	1.22917	1.08844	1.2069	0.364583
180	1.13433	0.692124	0.88	0.942623	1.08639	1.10092	1.35417	1.29252	1.03448	1.06771
210	0.597015	0.739857	1.6	1.10656	1.00785	1.14679	1.52083	1.08844	0.991379	0.807292
240	1.16418	0.835322		0.860656	0.968586	1.37615	1.45833	0.918367	0.948276	0.859375
270	1.13433	0.871122		1.22951	0.876964	0.825688	0.979167	0.884354	0.818966	0.911458
300	1.07463	1.01432	1.44	1.31147	0.955498	0.963303	0.75	1.66667	0.775862	1.35417
330	0.970149	1.13365	1.7	1.55738	1.02094	1.46789	0.895833	1.15646	0.818966	1.27604
360	0.835821	1.14559	1.42	1.47541	0.981676	1.65138	1.02083	1.4966	0.991379	1.5625
390	0.910448	1.13365	1.16	1.55738	0.968586	0.59633	1.02083	0.476191	1.12069	2.63021
420	0.791045	1.10979	1.42	1.43443	0.981676	0.504587	1.16667	0.476191	0.862069	1.06771
450	0.716418	1.09785	0.88	1.43443	1.09948	0.917431	0.875	0.476191	0.991379	0.911458
480	0.671642	1.24105	1.02	1.59836	1.00785	1.2844	1	0.408163	0.948276	0.677083
510	0.656716	1.21718	1.18	1.47541	1.04712	1.2844	1.10417	1.59864	0.862069	0.755208
540	0.761194	1.31265	1.08	1.55738	0.929319	1.10092	1.16667	0.782313	0.818966	0.598958
570	0.597015	1.56325	1.12	1.43443	0.968586	1.46789	1.22917	0.816327	0.431034	0.989583
600	0.507463	1.58711	1.2	1.39344	0.929319	1.10092	1.47917	1.2585	0.775862	1.06771

## Sheet: Figure 4D
The effects of CNO treatment on day 3 on PW threshold
Individual data showing the PW threshold (g)
mCherry-ipsi							hM4Di-ipsi
Days	mouse 1	mouse 2	mouse 3	mouse 4	mouse 5		Days	mouse 1	mouse 2	mouse 3	mouse 4	mouse 5	mouse 6	mouse 7	mouse 8	mouse 9
BL	1	1	1	1	1.4		BL	0.6	0.4	0.6	1	0.6	1	1	0.6	1
4hr	0.16	0.16	0.04	0.04	0.07		4hr	0.07	0.07	0.4	0.16	0.16	0.04	0.4	0.07	0.07
1	0.6	0.6	0.4	0.6	0.6		1	0.4	0.4	0.6	0.4	0.6	0.6	0.6	0.4	0.4
3	1	1.4	1	1	1.4		3	0.6	0.4	0.6	1	0.6	1	1	0.6	0.6
4hr	0.4	0.16	0.04	0.04	0.04		4hr	0.6	0.6	0.6	1.4	0.6	1	1.4	0.6	1
4	0.4	0.16	0.07	0.04	0.07		4	0.6	1	0.6	1	0.6	1	1	0.6	1
6	0.6	0.4	0.04	0.07	0.04		6	0.6	1	0.6	1.4	1	0.6	1.4	0.4	1
10	0.4	0.16	0.04	0.04	0.07		10	0.6	0.6	1	1	0.6	1	1	0.6	0.6
14	0.4	0.07	0.04	0.04	0.04		14	0.6	1	0.6	1	1	1	1	0.6	1
mCherry-contra							hM4Di-contra
Days	mouse 1	mouse 2	mouse 3	mouse 4	mouse 5		Days	mouse 1	mouse 2	mouse 3	mouse 4	mouse 5	mouse 6	mouse 7	mouse 8	mouse 9
BL	1	1	0.6	1	1		BL	0.6	1	0.6	1	0.6	0.6	1	0.6	1
4hr	0.16	0.16	0.04	0.04	0.07		4hr	0.16	0.4	0.04	0.16	0.16	0.4	0.4	0.04	0.4
1	0.6	0.6	0.4	0.6	0.6		1	0.4	0.6	0.4	0.4	0.4	0.6	0.4	0.4	0.6
3	1	0.6	0.6	1	1		3	0.4	1	0.4	0.6	0.6	0.6	1	0.4	1
4hr	0.4	0.16	0.04	0.04	0.04		4hr	0.6	1.4	0.6	1	1	0.6	1.4	0.6	0.6
4	0.4	0.16	0.07	0.04	0.07		4	0.6	1	0.6	0.6	1	0.6	1	0.6	1
6	0.6	0.16	0.04	0.07	0.04		6	1	1.4	1	1	0.6	0.6	1	0.6	1
10	0.4	0.16	0.04	0.04	0.04		10	0.6	1	0.6	1	1	0.6	1	1	1
14	0.4	0.16	0.04	0.04	0.04		14	1	1	0.6	1	1	0.6	1	0.6	1

## Sheet: Figure 4E
The effects of CNO treatment on day 15 on PW threshold
Individual data showing the PW threshold (g)
mCherry-ipsi												hM4Di-ipsi
Days	mouse 1	mouse 2	mouse 3	mouse 4	mouse 5	mouse 6	mouse 7	mouse 8	mouse 9	mouse 10		Days	mouse 1	mouse 2	mouse 3	mouse 4	mouse 5	mouse 6	mouse 7	mouse 8	mouse 9
BL	0.4	0.4	0.4	0.4	0.4	0.4	0.4	0.4	0.4	0.07		BL	0.6	0.4	0.6	0.6	0.6	0.6	0.6	1	0.6
4hr	0.04	0.04	0.04	0.04	0.04	0.04	0.04	0.04	0.04	0.04		4hr	0.07	0.07	0.04	0.04	0.16	0.07	0.04	0.16	0.04
1	0.16	0.07	0.07	0.07	0.07	0.07	0.07	0.04	0.16	0.04		1	0.4	0.16	0.16	0.16	0.16	0.4	0.4	0.07	0.4
3	0.4	0.16	0.4	0.4	0.4	0.4	0.4	0.4	0.4	0.07		3	0.6	0.6	0.4	0.4	0.4	0.6	0.6	0.6	0.4
4hr	0.07	0.07	0.07	0.04	0.04	0.04	0.04	0.04	0.07	0.04		4hr	0.04	0.04	0.04	0.04	0.04	0.07	0.07	0.04	0.16
4	0.07	0.07	0.04	0.04	0.04	0.04	0.04	0.04	0.07	0.04		4	0.04	0.04	0.04	0.04	0.04	0.07	0.16	0.04	0.04
6	0.07	0.04	0.07	0.04	0.04	0.04	0.04	0.04	0.07	0.04		6	0.04	0.04	0.04	0.04	0.04	0.07	0.07	0.04	0.04
10	0.04	0.04	0.04	0.04	0.04	0.04	0.04	0.04	0.07	0.04		10	0.04	0.04	0.04	0.04	0.16	0.07	0.07	0.04	0.07
14	0.04	0.04	0.04	0.04	0.04	0.04	0.04	0.04	0.07	0.04		14	0.16	0.4	0.04	0.04	0.04	0.07	0.07	0.04	0.04
15	0.04	0.04	0.04	0.04	0.04	0.04	0.04	0.04	0.07	0.04		15	1	0.16	1	0.6	0.6	0.4	0.4	0.4	0.6
mCherry-contra
Days	mouse 1	mouse 2	mouse 3	mouse 4	mouse 5	mouse 6	mouse 7	mouse 8	mouse 9	mouse 10
BL	0.4	0.4	0.4	0.4	0.4	0.4	0.4	0.4	0.4	0.07		hM4Di-contra
4hr	0.04	0.04	0.07	0.04	0.04	0.04	0.04	0.04	0.04	0.04		Days	mouse 1	mouse 2	mouse 3	mouse 4	mouse 5	mouse 6	mouse 7	mouse 8	mouse 9
1	0.07	0.07	0.07	0.07	0.07	0.07	0.16	0.07	0.16	0.04		BL	0.6	0.4	0.6	0.6	0.6	0.6	0.6	1	1
3	0.4	0.4	0.4	0.4	0.4	0.4	0.4	0.4	0.4	0.07		4hr	0.07	0.16	0.04	0.04	0.16	0.4	0.4	0.16	0.4
4hr	0.07	0.07	0.07	0.04	0.04	0.04	0.04	0.04	0.07	0.04		1	0.4	0.4	0.4	0.16	0.4	0.6	0.6	0.4	0.6
4	0.04	0.07	0.04	0.04	0.04	0.04	0.04	0.04	0.07	0.04		3	0.6	0.4	0.6	0.4	0.6	0.6	0.6	0.6	0.4
6	0.07	0.04	0.04	0.04	0.04	0.04	0.04	0.04	0.07	0.04		4hr	0.04	0.04	0.04	0.04	0.04	0.16	0.07	0.04	0.16
10	0.04	0.04	0.04	0.04	0.04	0.04	0.04	0.04	0.07	0.04		4	0.04	0.04	0.04	0.04	0.04	0.07	0.07	0.04	0.04
14	0.04	0.04	0.04	0.04	0.04	0.04	0.04	0.04	0.04	0.04		6	0.04	0.04	0.04	0.04	0.04	0.07	0.07	0.07	0.04
15	0.04	0.04	0.04	0.04	0.04	0.04	0.04	0.04	0.04	0.04		10	0.16	0.04	0.04	0.04	0.16	0.07	0.07	0.04	0.04
												14	0.04	0.04	0.04	0.04	0.04	0.07	0.07	0.04	0.04
												15	1	0.16	0.6	1	0.6	0.16	0.16	0.4	0.6

## Sheet: Figure 4F
The effects of CNO treatment on day 15 on open-arm time and total distance
Individual data showing the open-arm time (%) of each mouse
mouse	mCherry		mouse	hM4Di
1	23.4785		1	17.35
2	15.8377		2	21.6
3	2.14635		3	39.4
4	15.6917		4	18.6
5	18.5498		5	26.03
6	20.1235		6	20.2
7	17.3432		7	13.7428
			8	17.2335
			9	32.7432
			10	33.9434
			11	18.6277
			12	31.2278
			13	30.6828
			14	35.0417
Individual data showing the total distance (m) of each mouse
mouse	mCherry		mouse	hM4Di
1	22.0532		1	14.4157
2	14.7828		2	23.0652
3	15.5441		3	17.6319
4	23.8724		4	18.0906
5	19.5012		5	21.3726
6	17.9188		6	24.0757
7	17.1992		7	17.2957
			8	18.3186
			9	25.4601
			10	19.9313
			11	19.7572
			12	19.2716
			13	17.9504
			14	18.7811

## Sheet: Figure 4G
The effects of CNO treatment on day 15 on the time in light zone, number of transitions and total distance
Individual data showing the number of transitions of each mouse							Individual data showing the time in light zone (s) of each mouse
mouse	mCherry		mouse	hM4Di			mouse	mCherry		mouse	hM4Di
1	31		1	22			1	199		1	361
2	24		2	36			2	271		2	399
3	28		3	30			3	293		3	183
4	27		4	24			4	268		4	154
5	19		5	31			5	87		5	176
6	16		6	25			6	278		6	172
7	30		7	28			7	218		7	249
8	24		8	38			8	267		8	225
9	26		9	36			9	162		9	153
10	22						10	192
11	18						11	167
12	31						12	143
13	20						13	174
14	15						14	149
Individual data showing the total distance (m) of each mouse
mouse	mCherry		mouse	hM4Di
1	21.416		1	23.477
2	15.043		2	27.561
3	19.074		3	11.569
4	20.86		4	22.43
5	13.823		5	25.369
6	36.421		6	24.602
7	12.7		7	23.599
8	14.807		8	25.764
9	17.439		9	20.16
10	17.811
11	16.485
12	22.864
13	19.554
14	31.662

## Sheet: Figure 4H
The effects of CNO treatment on day 15 on the number of buried marbles
Individual data showing the number of buried marbles of each mouse
mouse	mCherry		mouse	hM4Di
1	20		1	4
2	22		2	5
3	20		3	4
4	16		4	11
5	12		5	12
6	10		6	11
7	13		7	9
			8	14
			9	9

## Sheet: Figure 4I
The effects of CNO treatment on day 15 on the relative time of immobility
Individual data showing the relative time of immobility (%) of each mouse
mouse	mCherry		mouse	hM4Di
1	69.0946		1	40
2	70.9573		2	58.67
3	59.6701		3	53.67
4	62.4595		4	47.28
5	62.0424		5	54.56
6	53.5446		6	54.1639
7	57.9557		7	59.3917
8	55.917		8	57.3461
9	60.25		9	60.2278
10	63.888		10	62.4121
11	70.8		11	48.8686
12	50

## Sheet: Figure 4J
The effects of CNO treatment on day 15 on the social-zone time
Individual data showing the social-zone time (%) of each mouse
mouse	mCherry		mouse	hM4Di
1	62.1233		1	74.67
2	40.0897		2	65.7821
3	56.4384		3	71.1706
4	31.5051		4	66.34
5	52.0393		5	43.4
6	35.8932		6	52.16
7	44.0282		7	70.47
8	51.7951		8	37.4798
			9	64.0946
			10	49.9278
			11	60.9499
			12	67.9205
			13	65.8944
			14	49.4341
Individual data showing the total distance (m) of each mouse
mouse	mCherry		mouse	hM4Di
1	13.3905		1	12.0356
2	15.2199		2	21.6192
3	16.4592		3	19.4574
4	17.6068		4	35.8903
5	18.2887		5	33.8246
6	20.3104		6	16.389
7	21.7603		7	15.4435
8	24.8102		8	31.9988
			9	21.7798
			10	17.4135
			11	10.6861
			12	19.1809
			13	19.9641
			14	21.6819
