# Supplementary material for: Cellular mechanisms underlying central sensitization in a mouse model of chronic muscle pain
Source: eLife. 2022 Nov 15;11:e78610. doi: 10.7554/eLife.78610 (PMC9665847; doi:10.7554/eLife.78610)
Supplement: Figure 5—figure supplement 1—source data 1. [file elife-78610-fig5-figsupp1-data1.xlsx]

## Sheet: Figure 5-Figure supplement 1C
The percentage of EPSC inhibition of Ctrl and MP group
Individual data showing the EPSC inhibition (%) of each cell after PGB application
	Ctrl			MP
	cell 1	12.8191		cell 1	25.3447
	cell 2	39.8868		cell 2	24.365
	cell 3	17.6988		cell 3	26.5049
				cell 4	46.0195
				cell 5	50.8504

## Sheet: Figure 5-Figure supplement 1D
The normalized EPSC over time of Ctrl and MP group
Ctrl					MP
Time (min)	cell 1	cell 2	cell 3		Time (min)	cell 1	cell 2	cell 3	cell 4	cell 5
0	1.07686	1.05509	1.02216		0	0.950821	0.931865	1.14061	1.14498	1.15825
1	1.00743	0.989769	0.982066		1	0.894343	1.16957	0.920731	1.05488	0.97387
2	0.890458	0.997723	0.941885		2	1.05883	0.868369	1.16482	1.02361	0.984106
3	0.834312	0.896848	0.982534		3	0.844609	1.07046	0.960704	0.889998	1.12982
4	1.1552	1.06057	1.07135		4	1.13872	1.05579	0.907779	1.09676	0.921989
5	1.03574	1.08189	0.922508		5	1.11268	0.903938	0.905355	0.789784	0.831963
6	0.948031	1.03225	0.946624		6	1.08932	0.799979	0.912286	0.742244	0.475656
7	0.80423	0.969941	0.938891		7	0.853542	0.832309	0.970518	0.600582	0.568032
8	0.656295	0.975315	1.04789		8	0.97999	0.777418	0.810854	0.595987	0.360315
9	0.846281	0.907956	1.0064		9	0.990854	0.734469	0.792264	0.607093	0.600753
10	0.786819	0.995187	0.856059		10	0.754608	0.759283	0.672379	0.501968	0.604988
11	0.860404	0.874289	0.803052		11	0.731011	0.793246	0.668331	0.419282	0.544298
12	0.847397	0.872534	0.780314		12	0.808043	0.717153	0.734375	0.906387	0.572578
13	0.750172	0.860066	0.908941		13	0.811652	0.726558	0.729661	0.452789	0.493132
14	0.753308	0.723394	0.788743		14	0.959929	0.688876	0.702235	0.658268	0.509068
15	0.714403	0.704995	0.802003		15	0.702336	0.646321	0.593291	0.643061	0.452748
16	0.894535	0.57576	0.821942		16	0.895475	0.729632	0.909703	0.466715	0.608326
17	0.732545	0.533385	0.669927		17	0.628616	0.796119	0.823833	0.637581	0.540536
18	0.946619	0.616878	0.692121		18	0.834407	0.798337	0.643967	0.383845	0.433506
19	0.693206	0.550471	0.953186		19	0.68577	0.698491	0.794696	0.558508	0.427628
20	0.874064		0.745645		20	0.678838	0.921679	0.772797	0.731886	0.485089

## Sheet: Figure 5-Figure supplement 1E
The paired-pulse ratio before and after PGB application
Individual data showing the paired-pulse ratio of each cell
		BL	PGB
	cell 1	0.171712	0.209577
	cell 2	0.528511	0.592201
	cell 3	0.406885	0.419556
	cell 4	0.266099	0.518908
	cell 5	0.312246	0.272903
	cell 6	0.538467	0.887135
	cell 7	0.665419	0.753492
	cell 8	0.539922	0.584415
