# Supplementary material for: Cellular mechanisms underlying central sensitization in a mouse model of chronic muscle pain
Source: eLife. 2022 Nov 15;11:e78610. doi: 10.7554/eLife.78610 (PMC9665847; doi:10.7554/eLife.78610)
Supplement: Figure 5—figure supplement 2—source data 1. [file elife-78610-fig5-figsupp2-data1.xlsx]

## Sheet: Figure 5-Figure supplement 2A
The EPSC amplitude recorded at PBN-CeA-SST neuron synapses in Ctrl and MP groups
Individual data showing the EPSC amplitude (pA) of each cells
	Ctrl			MP
	cell 1	51.2697		cell 1	43.6297
	cell 2	95.1974		cell 2	61.118
	cell 3	54.8533		cell 3	161.228
	cell 4	112.466		cell 4	81.3336
	cell 5	41.858		cell 5	216.506
	cell 6	175.271		cell 6	116.918
	cell 7	33.9845		cell 7	120.719
	cell 8	26.0686		cell 8	84.2822

## Sheet: Figure 5-Figure supplement 2B
The paired-pulse ratio recorded at PBN-CeA-SST neuron synapses in Ctrl and MP groups
Individual data showing the paired-pulse ratio of each cell
	Ctrl			MP
	cell 1	0.680419		cell 1	0.613318
	cell 2	0.498052		cell 2	0.641284
	cell 3	0.772419		cell 3	0.555426
	cell 4	0.560482		cell 4	0.462133
	cell 5	0.644443		cell 5	0.66
	cell 6	0.853671		cell 6	0.66
	cell 7	0.541074		cell 7	0.596236
	cell 8	0.631071		cell 8	0.577829

## Sheet: Figure 5-Figure supplement 2C
The EPSC amplitude recorded at PBN-CeA-PKCδ neuron synapses in Ctrl and MP groups
Individual data showing the EPSC amplitude (pA) of each cells
	Ctrl			MP
	cell 1	119.809		cell 1	31.3623
	cell 2	146.439		cell 2	118.492
	cell 3	78.6337		cell 3	147.156
	cell 4	197.13		cell 4	50.0202
	cell 5	164.7		cell 5	100.823
	cell 6	84.5362		cell 6	52.062
	cell 7	123.686		cell 7	55.872
	cell 8	196.137		cell 8	50.0124
	cell 9	106.734
	cell 10	124.049

## Sheet: Figure 5-Figure supplement 2D
The paired-pulse ratio recorded at PBN-CeA-PKCδ neuron synapses in Ctrl and MP groups
Individual data showing the paired-pulse ratio of each cell
	Ctrl			MP
	cell 1	0.427889		cell 1	0.987489
	cell 2	0.337936		cell 2	0.750303
	cell 3	0.762854		cell 3	0.244081
	cell 4	0.641037		cell 4	0.518812
	cell 5	0.83503		cell 5	0.422875
	cell 6	0.751314		cell 6	0.402775
	cell 7	0.521089		cell 7	0.389161
	cell 8	0.507608		cell 8	0.469567
	cell 9	0.848291
	cell 10	0.558259

## Sheet: Figure 5-Figure supplement 2E
The EPSC amplitude recorded at PBN-CeA-SST neuron synapses and PBN-CeA-PKCδ neuron synapses in Ctrl mice
Individual data showing the EPSC amplitude (pA) of each cells
	CeA-SST neurons			CeA-PKCδ neurons
	cell 1	51.2697		cell 1	119.809
	cell 2	95.1974		cell 2	146.439
	cell 3	54.8533		cell 3	78.6337
	cell 4	112.466		cell 4	197.13
	cell 5	41.858		cell 5	164.7
	cell 6	175.271		cell 6	84.5362
	cell 7	33.9845		cell 7	123.686
	cell 8	26.0686		cell 8	196.137
				cell 9	106.734
				cell 10	124.049

## Sheet: Figure 5-Figure supplement 2F
The EPSC amplitude recorded at PBN-CeA-SST neuron synapses and PBN-CeA-PKCδ neuron synapses in MP mice
Individual data showing the EPSC amplitude (pA) of each cells
	CeA-SST neurons			CeA-PKCδ neurons
	cell 1	43.6297		cell 1	31.3623
	cell 2	61.118		cell 2	118.492
	cell 3	161.228		cell 3	147.156
	cell 4	81.3336		cell 4	50.0202
	cell 5	216.506		cell 5	100.823
	cell 6	116.918		cell 6	52.062
	cell 7	120.719		cell 7	55.872
	cell 8	84.2822		cell 8	50.0124

## Sheet: Figure 5-Figure supplement 2G
The PPR recorded at PBN-CeA-SST neuron synapses and PBN-CeA-PKCδ neuron synapses in Ctrl mice
Individual data showing the PPR of each cells
	CeA-SST neurons			CeA-PKCδ neurons
	cell 1	0.680419		cell 1	0.427889
	cell 2	0.498052		cell 2	0.337936
	cell 3	0.772419		cell 3	0.762854
	cell 4	0.560482		cell 4	0.641037
	cell 5	0.644443		cell 5	0.83503
	cell 6	0.853671		cell 6	0.751314
	cell 7	0.541074		cell 7	0.521089
	cell 8	0.631071		cell 8	0.507608
				cell 9	0.848291
				cell 10	0.558259

## Sheet: Figure 5-Figure supplement 2H
The PPR recorded at PBN-CeA-SST neuron synapses and PBN-CeA-PKCδ neuron synapses in MP mice
Individual data showing the PPR of each cells
	CeA-SST neurons			CeA-PKCδ neurons
	cell 1	0.613318		cell 1	0.987489
	cell 2	0.641284		cell 2	0.750303
	cell 3	0.555426		cell 3	0.244081
	cell 4	0.462133		cell 4	0.518812
	cell 5	0.66		cell 5	0.422875
	cell 6	0.66		cell 6	0.402775
	cell 7	0.596236		cell 7	0.389161
	cell 8	0.577829		cell 8	0.469567
