# Supplementary material for: Cellular mechanisms underlying central sensitization in a mouse model of chronic muscle pain
Source: eLife. 2022 Nov 15;11:e78610. doi: 10.7554/eLife.78610 (PMC9665847; doi:10.7554/eLife.78610)
Supplement: Figure 5—source data 1. [file elife-78610-fig5-data1.xlsx]

## Sheet: Figure 5C
The percentage of EPSC inhibition of Ctrl and MP group
Individual data showing the EPSC inhibition (%) of each cell after PGB application
	Ctrl			MP
	cell 1	35.3942		cell 1	16.096
	cell 2	18.5575		cell 2	26.3093
	cell 3	20.875		cell 3	46.3953
				cell 4	23.0588
				cell 5	38.6899

## Sheet: Figure 5D
The normalized EPSC over time of Ctrl and MP group
Ctrl						MP
Time (min)	cell 1	cell 2	cell 3			Time (min)	cell 1	cell 2	cell 3	cell 4	cell 5
0	0.874487	0.914495	1.12696			0	0.926557	1.16372	1.13955	1.0283	0.831903
1	1.13857	0.966224	0.910377			1	1.11529	1.03527	0.99743	1.01692	1.01167
2	1.10088	0.967614	0.945929			2	1.01984	1.03058	0.970452	0.916776	1.08471
3	0.94521	1.1269	1.0754			3	0.93855	0.894593	0.981102	0.984019	1.03384
4	0.94085	1.06986	0.94133			4	0.99976	0.875837	0.911464	1.05399	1.03789
5	0.948138	0.959233	1.20298			5	1.15325	0.873959	0.891993	1.08998	1.02097
6	0.710733	0.957857	0.986951			6	0.925442	0.866662	0.981289	0.878234	1.08657
7	0.691588	0.991699	0.934843			7	1.06467	0.819532	0.848682	0.838161	1.14131
8	0.877163	0.969843	0.92041			8	0.782169	0.822958	0.693807	0.909857	1.08823
9	0.582104	1.03797	0.90326			9	0.989621	0.744857	0.747416	0.814101	1.14211
10	0.656667	1.11025	0.765236			10	1.03182	0.664139	0.63523	0.884869	1.18864
11	0.681991	0.99925	0.91387			11	0.758454	0.594913	0.639976	1.06269	1.10613
12	0.586553	0.882039	0.916073			12	0.848839	0.656125	0.588586	0.945862	1.0249
13	0.650404	0.815986	0.926356			13	1.04403	0.679358	0.6064	1.13733	0.683871
14	0.506595	0.809781	0.708336			14	0.673894	0.685267	0.587349	1.13045	0.611158
15	0.746357	0.857507	0.675248			15	1.01015	0.793664	0.55619	0.872322	0.635619
16	0.557896	0.837724	0.847914			16	0.780336	0.772814	0.525716	0.826815	0.565301
17	0.579157	0.769136	0.925547			17	0.65416	0.660408	0.492903	0.71984	0.666811
18	0.580158	0.826615	0.812745			18			0.541952	0.701937	0.663579
19	0.563386	0.84095	0.701528			19			0.564528	0.704408	0.650322
20	0.512836	0.817169	0.758609			20			0.578563		0.772525

## Sheet: Figure 5E
The paired-pulse ratio before and after PGB application
Individual data showing the paired-pulse ratio of each cell
		BL	PGB
	cell 1	0.680419	0.791449
	cell 2	0.498052	0.528566
	cell 3	0.560482	0.597416
	cell 4	0.613318	0.762586
	cell 5	0.641284	0.747712
	cell 6	0.462133	0.532928
	cell 7	0.596236	0.644955
	cell 8	0.577829	0.614469

## Sheet: Figure 5H
The effects of PGB treatment on the calcium event frequency and amplitude in the CeA-SST neurons
Individual data showing the event frequency (Hz) of each cell before and after PGB application
		BL	PGB			BL	PGB
	cell 1	0.019444	0.002778		cell 24	0.030556	0.025
	cell 2	0.022222	0.011111		cell 25	0.030556	0.008333
	cell 3	0.016667	0.013889		cell 26	0.016667	0.013889
	cell 4	0.025	0		cell 27	0.019444	0.013889
	cell 5	0.019444	0.038889		cell 28	0.019444	0.019444
	cell 6	0	0.002778		cell 29	0.011111	0.002778
	cell 7	0.041667	0.013889		cell 30	0.013889	0.027778
	cell 8	0.044444	0		cell 31	0.005556	0.005556
	cell 9	0.0222	0.03		cell 32	0.011111	0.002778
	cell 10	0.019444	0.033333		cell 33	0.038889	0.030556
	cell 11	0.025	0.025		cell 34	0.005556	0.05
	cell 12	0.019444	0.002778		cell 35	0.027778	0.041667
	cell 13	0.011111	0.044444		cell 36	0.052778	0.019444
	cell 14	0.072222	0.044444		cell 37	0.038889	0.002778
	cell 15	0.072222	0.002778		cell 38	0.069444	0.061111
	cell 16	0.025	0.025		cell 39	0.058333	0.027778
	cell 17	0.038889	0.083333		cell 40	0.030556	0.005556
	cell 18	0.058333	0.05		cell 41	0.058333	0.038889
	cell 19	0.055556	0.044444		cell 42	0.052778	0
	cell 20	0.105556	0.055556		cell 43	0.041667	0.013889
	cell 21	0.086111	0.005556		cell 44	0.05	0.002778
	cell 22	0.072222	0.025		cell 45	0.033333	0.002778
	cell 23	0.016667	0.055556		cell 46	0.041667	0.052778
Individual data showing the event amplitude (ΔF/F) of each cell before and after PGB application
		BL	PGB			BL	PGB
	cell 1	29.7103	13.9698		cell 24	26.664	41.7546
	cell 2	101.391	17.3145		cell 25	16.1144	14.2928
	cell 3	19.3485	13.4839		cell 26	28.3896	16.524
	cell 4	32.9942	0		cell 27	24.1408	33.7618
	cell 5	38.1693	48.5279		cell 28	46.1743	17.7088
	cell 6	0	11.9735		cell 29	16.677	11.1337
	cell 7	37.9024	54.9415		cell 30	54.9421	25.3726
	cell 8	24.928	0		cell 31	36.4273	16.9092
	cell 9	59.0682	90.2304		cell 32	89.3964	27.5434
	cell 10	15.9091	30.4317		cell 33	26.0561	20.5113
	cell 11	35.5703	43.0255		cell 34	79.2453	34.7581
	cell 12	29.7103	13.9698		cell 35	21.9252	34.3544
	cell 13	20.4789	32.166		cell 36	23.7373	19.3061
	cell 14	24.9474	20.0936		cell 37	19.131	11.1799
	cell 15	40.7484	65.4039		cell 38	31.9637	37.3624
	cell 16	27.5219	21.6213		cell 39	28.0475	19.0185
	cell 17	63.4773	36.7687		cell 40	26.9987	16.9866
	cell 18	25.5306	35.7009		cell 41	33.6235	28.5439
	cell 19	36.3947	18.7319		cell 42	25.2418	0
	cell 20	47.9634	76.8375		cell 43	44.8026	18.6972
	cell 21	26.1048	25.777		cell 44	28.6031	14.1278
	cell 22	21.3024	23.2543		cell 45	32.3637	10.5584
	cell 23	18.5256	23.5268		cell 46	29.5938	28.2909
